# Supplementary material
Source: Research Square preprint supplement (doi:10.21203/rs.3.rs-6009404/v1)
Supplement: Supplementary file 1 [file 02dbe81a34881ed4466d6b6f.xlsx]

## Sheet: genes signature
Gene set
Matrix stiffness signature relative genes	Cancer_stemness(Mirandaa_2019PNAS_cancer_stemness)	Pan_stemness (Palmer_2012GB_stemcell)	Sense Mechanical stimuli (GOBP_DETECTION_OF_MECHANICAL_STIMULUS)
LOX	DNMT3B	DNMT3B	ADGRV1
TGFB1	PFAS	MCM6	ANO3
PLOD2	XRCC5	CDC25A	ASIC2
HIF1A	HAUS6	PFAS	ASIC3
SMAD1	TET1	MCM4	BACE1
P4HA1/2	IGF2BP1	XRCC5	CAV3
ROCK2	PLAA	HAUS6	CDH2
TNC	TEX10	TET1	CHRNA10
ZEB1	MSH6	IGF2BP1	CHRNA9
TWIST1	DLGAP5	PLAA	COL11A1
VCL	SKIV2L2	DEPDC1B	CSRP3
TLN1	SOHLH2	TEX10	CTNNB1
TLN2	RRAS2	CCDC99	CXCL12
PXN	PAICS	MSH2	CXCR4
SNAI1	CPSF3	BUB1B	FYN
SERPINH1	LIN28B	MSH6	HPN
LOXL2	IPO5	DLGAP5	HTR2A
LOXL3	BMPR1A	SKIV2L2	ITGA2
Piezo1	ZNF788	CENPE	JUP
TRPV4	ASCC3	CHEK2	KCNA1
YAP1	FANCB	SOHLH2	KCNK4
TAFAZZIN	HMGA2	CCNB1	KCNQ1
TEAD1	TRIM24	RRAS2	KIT
TEAD2	ORC1	PRIM1	LHFPL5
TEAD3	HDAC2	PAICS	MKKS
TEAD4	HESX1	CCNA2	NTRK1
MMP2	INHBE	CPSF3	PDZD7
MMP9	MIS18A	NUSAP1	PHF24
COL1A1	DCUN1D5	LIN28B	PIEZO1
COL3A1	MRPL3	IPO5	PIEZO2
ITGAV	CENPH	KIF11	PJVK
ITGA5	MYCN	BMPR1A	PKD1
ITGB1	HAUS1	NDC80	PKD1L1
RHOA	GDF3	BCAT1	PKD1L2
RAC1	TBCE	CCNG1	PKD1L3
CDC42	RIOK2	ZNF788	PKD2
	BCKDHB	ASCC3	PKD2L1
	RAD1	FANCB	PKD2L2
	NREP	MCM10	PKDREJ
	ADH5	HMGA2	PTK2
	PLRG1	SKP2	SCN11A
	ROR1	TRIM24	SCN1A
	RAB3B	ORC1	SCN9A
	DIAPH3	HDAC2	SERPINE2
	GNL2	HESX1	STRC
	FGF2	C1orf135	TCAP
	NMNAT2	INHBE	TMC1
	KIF20A	MIS18A	TMC2
	CENPI	DCUN1D5	TMEM120A
	DDX1	POLE2	TNF
	XXYLT1	MRPL3	TRPA1
	GPR176	CENPH	TTN
	BBS9	MYCN	WHRN
	C14orf166	HAUS1
	BOD1	GDF3
	CDC123	TBCE
	SNRPD3	RIOK2
	FAM118B	BCKDHB
	DPH3	RAD1
	EIF2B3	NREP
	RPF2	ADH5
	APLP1	PLRG1
	DACT1	ROR1
	PDHB	RAB3B
	C14orf119	LOC285431
	DTD1	DBC1
	SAMM50	KIF23
	CCL26	DIAPH3
	MED20	GNL2
	UTP6	FGF2
	RARS2	TARDBP
	ARMCX2	NMNAT2
	RARS	ZNF167
	MTHFD2	KIF20A
	DHX15	CENPI
	HTR7	DDX1
	MTHFD1L	XXYLT1
	ARMC9	GPR176
	XPOT	FBXO22
	IARS	BBS9
	HDX	C14orf166
	ACTRT3	BOD1
	ERCC2	CDC123
	TBC1D16	SNRPD3
	GARS	FAM118B
	KIF7	DPH3
	UBE2K	EIF2B3
	SLC25A3	KDELC1
	ICMT	RPF2
	UGGT2	APLP1
	ATP11C	DACT1
	SLC24A1	PDHB
	EIF2AK4	C14orf119
	GPX8	DTD1
	ALX1	SAMM50
	OSTC	CCL26
	TRPC4	C4orf52
	HAS2	CCDC90B
	FZD2	MED20
	TRNT1	UTP6
	MMADHC	RARS2
	SNX8	KIAA0020
	CDH6	ARMCX2
	HAT1	RARS
	SEC11A	MTHFD2
	DIMT1	DHX15
	TM2D2	HTR7
	FST	HIST1H4C
	GBE1	MTHFD1L
		ARMC9
		XPOT
		IARS
		HDX
		ACTRT3
		ERCC2
		TBC1D16
		GARS
		KIF7
		UBE2K
		SLC25A3
		ICMT
		UGGT2
		ATP11C
		SLC24A1
		EIF2AK4
		GPX8
		ALX1
		OSTC
		TRPC4
		HAS2
		FZD2
		TRNT1
		MMADHC
		SNX8
		CDH6
		HAT1
		SEC11A
		DIMT1
		TM2D2
		FST
		GBE1
