# Supplementary material
Source: Research Square preprint supplement (doi:10.21203/rs.3.rs-6009404/v1)
Supplement: Supplementary file 2 [file 05b7f126929b0f78fcc65357.xlsx]

## Sheet: DNA Pull down MS
IQGAP3 promoter region DNA Pull down MS
name	ID	Region1._vs_control._p.val	Region2._vs_control._p.val	Region1._vs_control._log2FoldChang	Region2._vs_control._log2FoldChang
DLAT	P10515	6.09e-06	1.23e-05	8.47	7.3
NCAPD2	Q15021	0.000755009	0.000551822	7.4	7.93
RBM3	P98179	1.53e-06	1.94e-06	6.86	6.53
TLK2	Q86UE8	1.06e-05	1.28e-05	6.78	6.51
CASKIN2	Q8WXE0	2.58e-05	0.0729004	6.46	0.937
CARS1	P49589	0.000104933	5.75e-05	6.26	7.12
MGME1	Q9BQP7	4.82e-06	3.3e-06	6.25	6.76
TLK1	Q9UKI8	9.98e-06	1.09e-05	6.23	6.12
DOCK7	Q96N67	0.00252455	0.00274582	6.2	6.08
CNBP	P62633	0.000133369	7.69e-05	5.9	6.64
SRCAP	Q6ZRS2	0.00144009	0.127203	5.9	1.65
KCTD14	Q9BQ13	1.73e-06	9.34e-07	5.89	6.7
APOE	P02649	8.48e-05	8.93e-05	5.8	5.73
RRM1	P23921	6.32e-06	6.24e-06	5.78	5.8
PCBP4	P57723	3.16e-06	4.11e-06	5.72	5.41
SMARCAL1	Q9NZC9	0.000270377	0.000331188	5.63	5.39
NCAPH	Q15003	0.00033948	0.000221306	5.61	6.16
TOP3A	Q13472	2.07e-06	2.32e-06	5.6	5.47
GABPA	Q06546	8.19e-06	2.45e-06	5.59	7.2
FLNA	P21333	0.000139752	0.00016262	5.32	5.15
TGIF1	Q15583	4.78e-05	5.48e-05	5.32	5.17
MPG	P29372	0.000182416	0.000147168	5.24	5.49
GABPB1	Q06547	1.61e-05	5.17e-06	5.22	6.64
ITPRID2	P28290	0.00244327	0.00247175	5.18	5.16
NDUFAF7	Q7L592	2.04e-05	3.13e-05	5.16	4.71
RBPMS	Q93062	5.24e-06	5.01e-06	5.15	5.2
SPTBN2	O15020	0.000912361	0.00101503	5.14	5.02
DNM2	P50570	3.71e-05	1.89e-05	5.12	5.92
DAZAP1	Q96EP5	0.00251771	0.0024243	5.12	5.16
NT5E	P21589	2.57e-05	2.9e-05	5.1	4.97
SEPHS1	P49903	2.21e-05	1.26e-05	5.05	5.68
DDB2	Q92466	0.000118677	0.000115454	5.03	5.06
IMPDH1	P20839	0.000425645	0.000615902	5.01	4.61
MRPS36	P82909	0.000108037	9.38e-05	4.96	5.12
APOBEC3C	Q9NRW3	0.00571304	0.00538311	4.96	5.03
HMCES	Q96FZ2	6.74e-06	7.28e-06	4.94	4.86
RECQL	P46063	5.68e-05	5.84e-05	4.94	4.91
FBH1	Q8NFZ0	0.000527109	0.000579474	4.94	4.84
HDLBP	Q00341	0.019379	0.0217155	4.92	4.77
NAB2	Q15742	6.95e-05	5.05e-05	4.9	5.25
MND1	Q9BWT6	0.00331409	0.0100351	4.9	3.73
PURB	Q96QR8	0.000127778	0.000147886	4.88	4.73
TDP1	Q9NUW8	0.00132192	0.00163686	4.88	4.65
FNDC3A	Q9Y2H6	2.76e-05	2.83e-05	4.83	4.81
NCAPG	Q9BPX3	8.59e-06	4.71e-06	4.82	5.46
THUMPD1	Q9NXG2	0.000124747	0.00017828	4.82	4.46
FLNB	O75369	0.00560518	0.0068746	4.82	4.58
NMD3	Q96D46	9.95e-06	1.01e-05	4.81	4.8
FAM98B	Q52LJ0	9.24e-05	6.54e-05	4.79	5.15
CDK4	P11802	0.000842391	0.00087921	4.78	4.73
PARP14	Q460N5	0.000405002	0.000396868	4.76	4.78
MSH6	P52701	1.95e-05	1.63e-05	4.74	4.93
CDC23	Q9UJX2	0.000326937	0.000667798	4.7	4.02
NAB1	Q13506	1.07e-05	9.24e-06	4.66	4.81
PRDM2	Q13029	0.000767705	0.00100282	4.65	4.38
RSPRY1	Q96DX4	0.00430847	0.00448774	4.63	4.58
ACLY	P53396	0.00176117	0.00228615	4.62	4.35
TRMT1L	Q7Z2T5	0.00329815	0.0022798	4.62	5.03
MRE11	P49959	0.000105556	0.000100156	4.61	4.66
MEIS1	O00470	0.000633641	0.000898357	4.6	4.25
NELFB	Q8WX92	7.43e-05	6.34e-05	4.58	4.73
NOVA1	P51513	0.000120927	0.000762324	4.58	3.06
ABCB7	O75027	0.00423359	0.00762768	4.58	3.97
LGALS3BP	Q08380	0.0112576	0.0397819	4.58	3.21
CUL4B	Q13620	0.0119607	0.0104093	4.56	4.72
PML	P29590	0.000429493	0.000973849	4.56	3.8
MSH2	P43246	6.94e-05	5.5e-05	4.55	4.78
RMI2	Q96E14	2.77e-05	3.61e-05	4.54	4.3
ACTN1	P12814	0.00450698	0.00489994	4.54	4.44
LRRFIP2	Q9Y608	0.00139004	0.00127249	4.53	4.62
HPF1	Q9NWY4	2.49e-05	1.18e-05	4.51	5.28
RBPMS2	Q6ZRY4	3.43e-05	3.42e-05	4.5	4.5
WDR1	O75083	0.0429372	0.0420612	4.48	4.51
GAS7	O60861	3.91e-05	6.73e-05	4.47	3.98
PURA	Q00577	0.00246728	0.00325442	4.45	4.17
TRIM9	Q9C026	8.19e-06	9.67e-06	4.42	4.27
CIRBP	Q14011	0.000170192	0.000192835	4.41	4.29
EFR3B	Q9Y2G0	0.000149155	0.000118551	4.41	4.63
FSD1	Q9BTV5	3.8e-05	2.26e-05	4.4	4.91
MYO5B	Q9ULV0	0.000114603	0.000257094	4.4	3.69
KDM2A	Q9Y2K7	6.62e-05	3.66e-05	4.39	4.98
PBX1	P40424	0.000768135	0.00196966	4.38	3.54
MRPL49	Q13405	0.0312427	0.0811886	4.33	3.17
LGALS3	P17931	2.59e-05	1.34e-05	4.32	4.96
PDHX	O00330	1.86e-05	0.000114361	4.32	2.93
MPDZ	O75970	0.000113484	0.000115822	4.31	4.29
ZBED1	O96006	5.75e-05	1.55e-05	4.31	5.69
KRT87P	A6NCN2	0.0415533	0.0339836	4.31	4.58
CFL2	Q9Y281	0.00207763	0.00228971	4.29	4.19
RAB29	O14966	3.65e-05	3.54e-05	4.27	4.3
NEXN	Q0ZGT2	0.000448106	0.000508975	4.26	4.15
SOX9	P48436	0.000252044	0.000476636	4.26	3.7
POLE2	P56282	1.12e-05	7.59e-06	4.25	4.61
SMAD4	Q13485	0.000123207	7.19e-05	4.25	4.77
ZNF143	P52747	0.000126214	1.59e-05	4.25	6.6
PTK2	Q05397	0.00198488	0.00233631	4.24	4.08
WDHD1	O75717	0.000267933	0.000338146	4.24	4.03
CASK	O14936	0.000123474	0.000104442	4.22	4.37
POLM	Q9NP87	1.23e-05	2.98e-06	4.22	5.68
SSBP1	Q04837	0.000175694	0.000215739	4.21	4.03
AKAP2	Q9Y2D5	2.51e-05	2.79e-05	4.2	4.1
DDB1	Q16531	2.64e-05	2.54e-05	4.2	4.24
SPTAN1	Q13813	3.61e-05	3.62e-05	4.2	4.19
PCBP3	P57721	0.00134697	0.00165374	4.19	4
UTP25	Q68CQ4	0.00327372	0.00420577	4.16	3.92
AGO2	Q9UKV8	0.000275654	0.000299879	4.15	4.08
CUL4A	Q13619	1.2e-05	8.85e-06	4.14	4.42
SPTBN1	Q01082	0.000161737	0.000173285	4.14	4.07
CSDE1	O75534	0.0178997	0.0192192	4.14	4.06
ITPR2	Q14571	0.0176431	0.0158198	4.14	4.27
CDKN2A	P42771	3.38e-05	3.46e-05	4.13	4.11
EFHD2	Q96C19	0.00451869	0.00588835	4.13	3.87
TWF1	Q12792	0.00213104	0.00193762	4.13	4.22
SEPTIN11	Q9NVA2	3.78e-05	7.8e-05	4.12	3.53
PCBP2	Q15366	0.000289111	0.000463137	4.12	3.72
SEC23B	Q15437	1.46e-05	2.03e-05	4.11	3.83
E2F1	Q01094	6.06e-05	4.58e-05	4.1	4.35
ACOT9	Q9Y305	0.00304087	0.00107112	4.1	5.21
INTS15	Q96N11	0.000540421	0.000366272	4.1	4.47
NCAM1	P13591	0.000653581	0.000577757	4.1	4.21
NHEJ1	Q9H9Q4	5.11e-05	2.16e-05	4.09	4.91
RFX5	P48382	0.006558	0.0058178	4.09	4.21
UBE2D3	P61077	0.000817592	0.000666694	4.09	4.28
TWF2	Q6IBS0	0.000319893	0.000266	4.08	4.24
UNC45A	Q9H3U1	0.0102029	0.0160029	4.07	3.61
CKAP5	Q14008	1.63e-05	8.23e-06	4.06	4.69
TP53BP1	Q12888	3.36e-05	4.2e-05	4.06	3.87
UBASH3B	Q8TF42	0.000142372	0.000180738	4.06	3.86
LRCH3	Q96II8	0.00096768	0.00134641	4.06	3.77
ALKBH2	Q6NS38	2.06e-05	1.23e-05	4.04	4.51
SEPTIN2	Q15019	0.00200675	0.0032549	4.04	3.61
PTPN11	Q06124	1.37e-05	1.65e-05	4.03	3.88
RNASEH1	O60930	0.000116911	6.84e-05	4.03	4.52
CSRP2	Q16527	2.67e-05	3.28e-05	4.02	3.85
DBN1	Q16643	0.000112036	0.000116166	4.02	3.99
LIMCH1	Q9UPQ0	0.000157972	0.000184392	4.02	3.89
ANLN	Q9NQW6	0.00163147	0.00145686	4.01	4.12
MTCL1	Q9Y4B5	0.069832	0.0969243	4.01	3.55
RSRC2	Q7L4I2	0.00656597	0.0149514	4.01	3.25
UBTD1	Q9HAC8	0.000476766	0.000563658	4	3.86
RAB34	Q9BZG1	0.000515124	0.000515412	3.99	3.99
GRAMD1A	Q96CP6	1.85e-05	1.81e-05	3.98	4
GNAZ	P19086	0.000392196	0.000425717	3.98	3.91
KMT2B	Q9UMN6	0.000220299	0.000130614	3.97	4.44
HSPA14	Q0VDF9	0.00405551	0.00392493	3.96	3.99
COL5A2	P05997	3.51e-05	2.81e-05	3.95	4.14
RRAS2	P62070	0.000116598	0.000267849	3.94	3.29
DLG1	Q12959	0.00105459	0.00148117	3.94	3.64
FSCN1	Q16658	0.00296297	0.00521543	3.94	3.44
PRDX1	Q06830	0.000120928	0.000100081	3.93	4.09
FYN	P06241	0.00583118	0.00549968	3.93	3.99
PGK1	P00558	0.031567	0.420253	3.93	1.15
GSK3B	P49841	0.000364832	0.000351407	3.92	3.96
POT1	Q9NUX5	0.000387886	0.000245341	3.92	4.33
CORO1B	Q9BR76	0.000192247	0.000203409	3.9	3.85
TOMM34	Q15785	0.0207723	0.0338304	3.89	3.38
ACACB	O00763	0.000121748	8.8e-05	3.88	4.16
SNAP23	O00161	0.000904898	0.000952935	3.87	3.83
YBX3	P16989	0.0347802	0.0367734	3.86	3.79
COPS4	Q9BT78	0.00061897	0.000327878	3.85	4.43
CD59	P13987	3.87e-05	4.38e-05	3.84	3.74
CLASP2	O75122	0.0379901	0.0105574	3.84	5.5
ZMAT3	Q9HA38	0.000948077	0.000885365	3.84	3.9
ERLIN1	O75477	1.44e-05	1.28e-05	3.83	3.93
CORO1C	Q9ULV4	4.34e-05	4.04e-05	3.82	3.88
DCAKD	Q8WVC6	0.0120271	0.00726028	3.81	4.34
ACTR10	Q9NZ32	0.000181711	0.000184176	3.8	3.78
EDC4	Q6P2E9	0.00309842	0.00276834	3.79	3.9
SEPTIN10	Q9P0V9	0.000737104	0.000900169	3.79	3.62
USP48	Q86UV5	0.00313632	0.0111932	3.79	2.77
CTNNB1	P35222	0.028998	0.0307496	3.78	3.72
SMARCAD1	Q9H4L7	0.00122132	0.000921837	3.77	4.02
MUTYH	Q9UIF7	0.000136258	9.26e-05	3.76	4.08
NABP2	Q9BQ15	2.64e-05	3.21e-05	3.76	3.61
GSN	P06396	0.00176256	0.00524852	3.76	2.9
GNAO1	P09471	7.68e-05	7.75e-05	3.75	3.74
SOAT1	P35610	6.97e-05	7.16e-05	3.75	3.73
PRRX1	P54821	0.015378	0.0166466	3.75	3.67
LYN	P07948	0.00101375	0.00120064	3.74	3.6
COA8	Q96IL0	0.000580868	0.000391126	3.73	4.07
DSTN	P60981	0.000404932	0.000334218	3.73	3.89
TELO2	Q9Y4R8	0.0267956	0.0789189	3.72	2.62
TRIM24	O15164	2.34e-05	2.1e-05	3.69	3.77
GNA11	P29992	0.00256779	0.00245106	3.69	3.73
SPOP	O43791	0.00197894	0.00180058	3.69	3.77
RMI1	Q9H9A7	3.32e-05	4.82e-05	3.68	3.4
XPA	P23025	0.000904714	0.000998651	3.68	3.6
POLE	Q07864	1.59e-05	1.07e-05	3.66	3.98
ERLIN2	O94905	0.000246922	0.000201915	3.66	3.83
IRF2BPL	Q9H1B7	0.00708016	0.0168526	3.66	2.92
UBE2N	P61088	0.000284742	0.000638846	3.66	3.06
RFTN1	Q14699	0.000148601	0.000196593	3.65	3.43
MPC2	O95563	0.00263109	0.00237106	3.64	3.73
NFATC1	O95644	0.000831734	0.00069688	3.64	3.79
ARNT2	Q9HBZ2	0.000425542	0.000315459	3.63	3.88
PSMC3IP	Q9P2W1	0.0353529	0.0420079	3.6	3.42
KIF4A	O95239	7.86e-05	5.23e-05	3.59	3.92
SMCHD1	A6NHR9	6.94e-05	5.09e-05	3.59	3.84
CCT8	P50990	0.000114245	0.000275102	3.58	2.96
AHCYL1	O43865	0.000117296	0.000104325	3.57	3.66
E2F4	Q16254	0.000101485	1.89e-05	3.57	5.11
LIN54	Q6MZP7	5.59e-05	1.02e-05	3.56	5.11
RPA3	P35244	2.49e-05	2.64e-05	3.56	3.52
VRK3	Q8IV63	3.86e-05	3.35e-05	3.56	3.67
UNG	P13051	0.000742747	0.00085089	3.55	3.45
BMAL1	O00327	0.0265701	0.0270082	3.54	3.52
RBM4	Q9BWF3	2.14e-05	1.35e-05	3.52	3.87
MAP4K5	Q9Y4K4	0.000899904	0.000856654	3.52	3.56
NDUFS3	O75489	0.00646457	0.00548791	3.51	3.65
TNC	P24821	0.00503614	0.00419962	3.51	3.67
KIF5B	P33176	0.0127344	0.0110823	3.5	3.63
HSD17B4	P51659	5.14e-05	6.76e-05	3.49	3.29
MAPK1	P28482	0.000110846	9.37e-05	3.48	3.61
MAML2	Q8IZL2	0.000348158	0.000165337	3.46	4.07
CNTNAP1	P78357	0.010281	0.0181208	3.46	2.97
FN3K	Q9H479	0.00404432	0.00314863	3.46	3.67
ZSCAN20	P17040	0.000646627	0.000573234	3.45	3.54
E2F2	Q14209	0.00014891	5.18e-05	3.44	4.31
POLR3F	Q9H1D9	0.000160689	0.000108299	3.44	3.74
COPG2	Q9UBF2	0.00098746	0.00104883	3.44	3.39
COLGALT1	Q8NBJ5	0.000868926	0.0014856	3.43	3.04
EIF5	P55010	0.00121847	0.00145396	3.43	3.29
TUBGCP2	Q9BSJ2	0.00411734	0.00233449	3.43	3.92
HNRNPK	P61978	2.28e-05	3.09e-05	3.42	3.2
ERI3	O43414	0.000315071	0.000393656	3.42	3.25
ORC3	Q9UBD5	0.0698022	0.0654276	3.42	3.5
PRPS1	P60891	0.000116017	0.000104203	3.41	3.49
VPS39	Q96JC1	0.000103611	8.54e-05	3.41	3.56
DOCK11	Q5JSL3	0.000812889	0.000525554	3.41	3.75
GRSF1	Q12849	0.00347609	0.00326344	3.41	3.46
RBMS1	P29558	0.0143573	0.0206503	3.41	3.08
GLIPR2	Q9H4G4	0.000262507	0.000265837	3.4	3.39
VPS35	Q96QK1	0.00467715	0.00629797	3.39	3.15
CHMP4B	Q9H444	4.25e-05	1.72e-05	3.38	4.1
EFR3A	Q14156	0.000625565	0.000498032	3.36	3.54
ETFB	P38117	0.00080389	0.000749684	3.36	3.42
CLPX	O76031	0.00436387	0.00381813	3.35	3.46
NFS1	Q9Y697	0.00196805	0.00268644	3.35	3.11
PRPF18	Q99633	0.0177149	0.0189054	3.35	3.29
SRP54	P61011	0.000811156	0.000939451	3.35	3.24
XPO5	Q9HAV4	0.0118182	0.0127569	3.35	3.28
PBX2	P40425	3.16e-05	7.41e-05	3.34	2.79
SEPTIN9	Q9UHD8	7.37e-05	0.000140413	3.34	2.91
YEATS2	Q9ULM3	0.000140051	0.00053971	3.34	2.49
RBM6	P78332	0.0117949	0.012001	3.34	3.33
DENR	O43583	0.000145208	0.000128965	3.33	3.42
SMTN	P53814	0.00753661	0.00856262	3.33	3.22
RFXANK	O14593	0.000154045	0.000149876	3.32	3.34
INF2	Q27J81	0.00312235	0.00431012	3.32	3.07
MORC2	Q9Y6X9	0.0741132	0.402325	3.32	1.34
PAXX	Q9BUH6	0.00133248	0.000416654	3.32	4.31
COL4A1	P02462	0.00477188	0.0055378	3.31	3.19
GART	P22102	0.00286642	0.00183446	3.31	3.68
KCTD10	Q9H3F6	0.00280236	0.00309705	3.31	3.23
WRN	Q14191	0.000143981	0.000216913	3.3	3.02
ITPR3	Q14573	0.000224014	0.000245097	3.3	3.24
EFHD1	Q9BUP0	0.000769246	0.000796041	3.29	3.26
PBX3	P40426	0.000318224	0.00165734	3.29	2.28
UBE2I	P63279	0.00289292	0.00222868	3.29	3.49
GIT1	Q9Y2X7	0.000256639	0.000295076	3.28	3.18
SLC25A32	Q9H2D1	0.00184836	0.0015784	3.28	3.4
TRMT6	Q9UJA5	0.0150031	0.0160419	3.28	3.22
ANAPC1	Q9H1A4	0.000308523	0.000219063	3.27	3.52
FERMT2	Q96AC1	0.0122004	0.0122428	3.27	3.26
RPA2	P15927	0.000486974	0.000658156	3.27	3.06
FASTKD5	Q7L8L6	0.000141555	0.000190991	3.26	3.06
AMPD2	Q01433	0.0353164	0.897956	3.26	0.152
PNKP	Q96T60	0.00141276	0.000692947	3.24	3.81
COX6C	P09669	0.000342982	0.000196729	3.23	3.65
RPA1	P27694	0.000225094	0.00026111	3.23	3.13
COL5A1	P20908	0.000184017	0.000296768	3.22	2.9
LIMA1	Q9UHB6	6.84e-05	7.52e-05	3.22	3.16
POLR3GL	Q9BT43	0.000156131	5.92e-05	3.22	3.96
TPR	P12270	3.18e-05	2.83e-05	3.22	3.3
FADS1	O60427	0.026686	0.0436923	3.22	2.77
ANKLE2	Q86XL3	0.000785647	0.000849964	3.21	3.16
DYRK1A	Q13627	0.013237	0.156426	3.21	1.41
FLII	Q13045	0.000227023	0.000207833	3.21	3.27
MFGE8	Q08431	0.000254952	0.000264348	3.21	3.18
BRAP	Q7Z569	0.00135546	0.00391216	3.2	2.5
STAT1	P42224	0.000650326	0.000877452	3.2	2.99
ARNT	P27540	0.000102763	7.57e-05	3.19	3.41
RARA	P10276	0.00013337	1.86e-05	3.19	4.85
ANKRD28	O15084	0.000991957	0.00087725	3.19	3.28
ERCC6L	Q2NKX8	0.000333433	0.000243415	3.19	3.42
MSH3	P20585	3.73e-05	4.29e-05	3.18	3.09
PPM1G	O15355	0.000314019	0.000182116	3.18	3.58
NDUFA5	Q16718	0.000761938	0.000488639	3.17	3.5
PSMC2	P35998	0.000889646	0.00112763	3.17	3
DNMT1	P26358	0.000130156	7.45e-05	3.16	3.56
ACSL4	O60488	0.00588182	0.00646877	3.16	3.09
MRPL17	Q9NRX2	0.00339814	0.00329065	3.16	3.19
E2F3	O00716	7.35e-05	3.89e-05	3.15	3.61
CGN	Q9P2M7	0.000293867	0.000359755	3.15	3.01
GFPT1	Q06210	0.0279239	0.0281323	3.15	3.14
KDM3A	Q9Y4C1	0.00788269	0.00721217	3.15	3.22
MYO6	Q9UM54	0.000340322	0.000387486	3.15	3.06
THY1	P04216	0.000307261	0.000301092	3.15	3.17
ITPR1	Q14643	0.0027783	0.00391497	3.14	2.9
RXRA	P19793	0.0032793	0.000688415	3.14	4.49
USP3	Q9Y6I4	0.000134954	0.000122414	3.13	3.19
CCDC82	Q8N4S0	0.00346096	0.00168903	3.13	3.71
NOTCH3	Q9UM47	0.000409681	0.000172527	3.11	3.76
OTUD6B	Q8N6M0	0.000121299	9.65e-05	3.11	3.27
APEX1	P27695	0.000732527	0.00063817	3.1	3.19
CCNY	Q8ND76	0.00482927	0.00449907	3.1	3.16
SACM1L	Q9NTJ5	0.00164356	0.00150565	3.1	3.17
CYB5R3	P00387	0.0233701	0.0812762	3.09	2.07
EDC3	Q96F86	0.00108287	0.00170086	3.09	2.79
ERBIN	Q96RT1	0.00300873	0.00556559	3.09	2.67
S100A10	P60903	0.00364978	0.00371243	3.09	3.08
CAND1	Q86VP6	3.66e-05	6.51e-05	3.08	2.72
IMPDH2	P12268	6.89e-05	8.67e-05	3.08	2.93
ARVCF	O00192	0.00604599	0.00384013	3.08	3.44
SEPTIN5	Q99719	0.00285502	0.00402346	3.08	2.84
HNRNPD	Q14103	4.08e-05	7.9e-05	3.07	2.66
PLOD3	O60568	0.000563355	0.000921217	3.07	2.75
RNF20	Q5VTR2	0.00219678	0.00359357	3.07	2.74
RTCA	O00442	0.00851545	0.0094142	3.07	3
MRPL39	Q9NYK5	0.00233447	0.00605685	3.06	2.44
NDUFS1	P28331	0.000893991	0.000838684	3.06	3.1
OGT	O15294	0.0104363	0.00471423	3.06	3.73
ZNF383	Q8NA42	0.000368926	0.000344846	3.06	3.1
CPT1C	Q8TCG5	0.00682898	0.0074202	3.05	2.99
PICALM	Q13492	0.0133518	0.0139778	3.05	3.02
TRIP6	Q15654	0.00170578	0.00103859	3.05	3.42
PDHB	P11177	0.00670553	0.0393308	3.04	1.87
RFX4	Q33E94	0.000453716	0.000338651	3.04	3.25
DDX1	Q92499	3.7e-05	4.48e-05	3.03	2.91
OGDH	Q02218	0.000158233	0.000130694	3.03	3.16
GNG12	Q9UBI6	0.0304935	0.00904877	3.03	4.23
INTS5	Q6P9B9	0.00659827	0.00766333	3.03	2.91
PIN1	Q13526	0.00107802	0.00119123	3.03	2.96
DLST	P36957	0.000102729	9.77e-05	3.02	3.06
GNAI3	P08754	8.53e-05	0.000100422	3.02	2.92
DIP2C	Q9Y2E4	0.00246151	0.00265012	3.01	2.96
NDUFS8	O00217	0.0249871	0.0302595	3.01	2.85
SIRT6	Q8N6T7	0.00588396	0.00380709	3.01	3.35
SYMPK	Q92797	0.0667621	0.0696053	3.01	2.96
TMX3	Q96JJ7	0.0115547	0.0208369	3.01	2.57
UQCRQ	O14949	0.152134	0.150112	3.01	3.03
ANXA5	P08758	0.000212524	0.341053	3	0.316
DOK1	Q99704	0.0450196	0.301696	3	1.29
GRK2	P25098	0.00307535	0.0016239	3	3.48
LMO7	Q8WWI1	0.00292488	0.00492747	3	2.65
NAA35	Q5VZE5	0.0123917	0.0364353	2.99	2.2
PIAS2	O75928	0.00333256	0.00305651	2.98	3.05
ACTN4	O43707	0.000154037	0.000147792	2.97	3
GLE1	Q53GS7	0.000938616	0.000926099	2.97	2.98
HDGF	P51858	0.000280399	0.000352805	2.97	2.82
NBN	O60934	0.000496647	0.000772412	2.96	2.68
PSMA2	P25787	0.180398	0.120839	2.96	3.55
GNPAT	O15228	7.75e-05	5.16e-05	2.95	3.22
INTS3	Q68E01	6.92e-05	7.46e-05	2.95	2.9
CWF19L1	Q69YN2	0.0197657	0.0503257	2.95	2.23
EIF4E	P06730	0.000428795	0.000461706	2.95	2.9
PKNOX1	P55347	0.00294865	0.00860426	2.95	2.27
ZHX1	Q9UKY1	0.00335032	0.0017791	2.95	3.42
MCTS1	Q9ULC4	0.000766474	0.000465322	2.94	3.28
FLOT2	Q14254	0.000122808	0.000118964	2.93	2.95
NDUFS2	O75306	7.71e-05	0.000205737	2.93	2.37
LIN37	Q96GY3	0.00326963	0.000544133	2.93	4.41
LANCL2	Q9NS86	0.00191769	0.00142252	2.92	3.13
PTPRS	Q13332	0.000501281	0.000895119	2.92	2.56
GTPBP1	O00178	4.41e-05	2.9e-05	2.91	3.18
SHOC2	Q9UQ13	0.000103673	0.000102552	2.91	2.92
CDC27	P30260	0.000845827	0.00125813	2.91	2.66
GLDC	P23378	0.00829714	0.00214843	2.91	4.04
MAX	P61244	0.0376624	0.0544593	2.91	2.59
MYO18A	Q92614	0.00021502	0.000202989	2.91	2.94
NUDC	Q9Y266	0.00256968	0.00632808	2.91	2.34
SEPTIN7	Q16181	0.000283194	0.000843876	2.91	2.28
TRAP1	Q12931	0.00840489	0.0405337	2.89	1.87
CACYBP	Q9HB71	6.07e-05	5.66e-05	2.88	2.92
FHL1	Q13642	0.045668	0.0813887	2.88	2.36
POLG2	Q9UHN1	5.19e-05	4.57e-05	2.87	2.95
USP22	Q9UPT9	0.0158548	0.0271331	2.87	2.47
MYCN	P04198	0.00343372	0.00216617	2.86	3.19
NFATC2IP	Q8NCF5	0.0101579	0.0079987	2.86	3.04
RTCB	Q9Y3I0	0.000111708	0.00013136	2.85	2.75
CNN3	Q15417	0.0344885	0.0495112	2.85	2.55
DOCK5	Q9H7D0	0.119181	0.593697	2.85	0.86
LRCH4	O75427	0.00875717	0.00768357	2.85	2.95
MTIF2	P46199	0.0045886	0.00420171	2.85	2.91
RAD18	Q9NS91	0.102687	0.263033	2.85	1.79
SMAD2	Q15796	0.00955944	0.0163969	2.85	2.47
CCNA2	P20248	0.000145662	5.36e-05	2.84	3.52
NUP85	Q9BW27	0.000176165	0.000170965	2.84	2.86
SACS	Q9NZJ4	5.23e-05	8.64e-05	2.84	2.55
PTGES3	Q15185	0.00685663	0.0151147	2.84	2.32
RP2	O75695	0.00389474	0.00301928	2.84	3.02
CYB5R1	Q9UHQ9	0.0196352	0.0234789	2.83	2.69
NOTCH2	Q04721	0.0293631	0.0216681	2.83	3.09
E2F7	Q96AV8	0.00926514	0.00448488	2.82	3.37
ECH1	Q13011	0.00659251	0.0178694	2.82	2.17
GNAI2	P04899	0.000383503	0.000449574	2.82	2.72
MAT2A	P31153	0.00597647	0.00460977	2.82	3.01
COPS3	Q9UNS2	0.000154394	0.000185267	2.81	2.7
SERBP1	Q8NC51	5.58e-05	5.42e-05	2.81	2.82
BAG5	Q9UL15	0.00454421	0.00840694	2.81	2.41
CCM2	Q9BSQ5	0.000330297	0.000469573	2.81	2.61
PNPT1	Q8TCS8	0.000216774	0.000309845	2.81	2.6
ZMYM2	Q9UBW7	7.76e-05	6.6e-05	2.8	2.9
AFG2A	Q8NB90	0.0159105	0.0102297	2.8	3.14
CHTF18	Q8WVB6	0.000913259	0.0013886	2.8	2.54
MRPL53	Q96EL3	0.0053231	0.00269359	2.8	3.29
GMPS	P49915	0.0044824	0.0042103	2.79	2.84
PDIA6	Q15084	0.011269	0.0291726	2.79	2.15
HMGB3	O15347	0.000254755	0.000143393	2.78	3.15
CRIP2	P52943	0.00033414	0.000301369	2.78	2.85
GNAQ	P50148	0.00684306	0.00350369	2.78	3.27
SLC4A4	Q9Y6R1	0.0760328	0.420603	2.78	1.09
SUPT5H	O00267	0.0518812	0.0568921	2.78	2.69
ZRANB3	Q5FWF4	0.0172218	0.0228141	2.78	2.57
BANP	Q8N9N5	0.00396551	0.000498194	2.77	4.46
PDK3	Q15120	0.00128805	0.00160259	2.77	2.64
ZBTB17	Q13105	0.000470998	0.0004569	2.76	2.78
YES1	P07947	0.00242461	0.00305715	2.75	2.61
MCCC1	Q96RQ3	0.000145082	0.000891613	2.74	1.84
MCM6	Q14566	0.000258378	0.000109034	2.74	3.31
NUP37	Q8NFH4	0.0751702	0.126684	2.74	2.23
THYN1	Q9P016	0.00495959	0.00190414	2.74	3.44
EMC3	Q9P0I2	0.0550783	0.0867596	2.72	2.31
FLOT1	O75955	0.000141525	0.000156959	2.71	2.65
PPP2R2A	P63151	0.000108174	0.000112288	2.71	2.69
ACADM	P11310	0.0106808	0.00757473	2.71	2.96
HIP1	O00291	0.000261236	0.0004541	2.71	2.4
PALM	O75781	0.00419139	0.00516319	2.71	2.58
COBL	O75128	0.00591853	0.00615836	2.7	2.67
DYNC1H1	Q14204	0.0015088	0.00176204	2.7	2.6
STT3A	P46977	0.00152162	0.00439436	2.7	2.1
LIG4	P49917	0.000121393	4.3e-05	2.69	3.36
HNRNPLL	Q8WVV9	0.000540039	0.000871846	2.69	2.42
RAVER1	Q8IY67	0.000453494	0.000499949	2.69	2.64
DDX6	P26196	0.000142645	0.000146971	2.68	2.66
EEPD1	Q7L9B9	6.68e-05	0.000101084	2.68	2.45
MTFR1L	Q9H019	0.000115673	0.000160953	2.68	2.49
AFAP1L1	Q8TED9	0.00093077	0.00111408	2.68	2.57
EHD2	Q9NZN4	0.00350632	0.00458908	2.68	2.51
KIAA1549	Q9HCM3	0.000255318	0.205933	2.68	-0.406
TAF15	Q92804	0.00602184	0.00580462	2.68	2.7
GARS1	P41250	0.000125434	0.000129015	2.67	2.65
AASS	Q9UDR5	0.018992	0.0244238	2.67	2.49
SCYL1	Q96KG9	0.00429533	0.00268844	2.67	2.99
THAP12	O43422	0.00124984	0.000779011	2.67	2.97
GNB1	P62873	0.000236738	0.000237871	2.66	2.66
PSME2	Q9UL46	0.00125982	0.00101925	2.66	2.79
SAMD1	Q6SPF0	0.00836035	0.00184236	2.66	3.83
MTG1	Q9BT17	0.00013141	0.000110604	2.65	2.76
DOCK6	Q96HP0	0.00486218	0.0155737	2.65	1.97
MTARC1	Q5VT66	0.0316588	0.00927559	2.65	3.71
AGO1	Q9UL18	0.000345255	0.000313102	2.64	2.7
CS	O75390	0.000338373	0.0012713	2.64	1.97
HAT1	O14929	0.000173831	0.000242688	2.63	2.45
RCC2	Q9P258	0.000200745	0.000175754	2.63	2.7
ACTR2	P61160	0.00614691	0.00907184	2.63	2.38
ARL8A	Q96BM9	0.000331286	0.000569951	2.63	2.33
MTHFD1	P11586	0.000236414	0.000374301	2.63	2.38
DR1	Q01658	0.000867254	0.00064311	2.62	2.81
NUP98	P52948	0.00339354	0.00410586	2.62	2.51
RTRAF	Q9Y224	0.000323772	0.00028955	2.62	2.68
TIA1	P31483	0.00104459	0.000973966	2.62	2.66
NSF	P46459	0.000144181	0.000122239	2.61	2.71
POLR3H	Q9Y535	8.93e-05	5.05e-05	2.61	2.95
SKI	P12755	8.05e-05	2.36e-05	2.61	3.39
DPYSL2	Q16555	0.0151628	0.0145064	2.61	2.64
ELF2	Q15723	0.00183468	0.000721459	2.61	3.22
FAN1	Q9Y2M0	0.00596779	0.00595027	2.61	2.61
NFYC	Q13952	0.0155721	0.0196478	2.61	2.45
RNH1	P13489	0.00706568	0.00917062	2.61	2.45
TMOD3	Q9NYL9	0.000237591	0.000233318	2.61	2.62
UHRF2	Q96PU4	0.00249966	0.00152646	2.61	2.93
DNAJC2	Q99543	0.000101009	8.77e-05	2.6	2.68
EHD1	Q9H4M9	0.00916679	0.00911784	2.6	2.61
NUCB2	P80303	0.00618457	0.00945275	2.6	2.33
ZNF521	Q96K83	0.00267688	0.00314868	2.6	2.5
GPX4	P36969	0.000370828	0.000286071	2.59	2.74
MCCC2	Q9HCC0	0.000294278	0.00626931	2.59	1.28
MOV10	Q9HCE1	0.0611852	0.0419174	2.59	2.93
ORC6	Q9Y5N6	0.0126094	0.0113975	2.59	2.66
PCMT1	P22061	0.00163585	0.00140522	2.59	2.68
RANGAP1	P46060	0.00133588	0.00182325	2.59	2.41
TAP1	Q03518	0.00130867	0.00180501	2.59	2.41
TCEA1	P23193	0.00217865	0.0024559	2.59	2.52
ZHX3	Q9H4I2	0.0405667	0.0323261	2.59	2.78
MMAA	Q8IVH4	0.00320905	0.00291025	2.58	2.64
PEG10	Q86TG7	0.000504119	0.000359577	2.58	2.78
TRIM32	Q13049	0.00913062	0.00528161	2.58	2.95
USP5	P45974	0.00607217	0.00590303	2.58	2.6
COP1	Q8NHY2	0.0827626	0.0989426	2.57	2.4
EIF2AK2	P19525	0.000291979	0.000245757	2.57	2.67
GNB2	P62879	0.00651602	0.0103929	2.57	2.28
HK2	P52789	0.00357364	0.00271735	2.57	2.74
RFXAP	O00287	0.0230675	0.0289426	2.57	2.41
RHOJ	Q9H4E5	0.00268243	0.00244756	2.57	2.63
DDX3Y	O15523	0.0151294	0.0156699	2.56	2.54
UGP2	Q16851	0.000276384	0.00213777	2.56	1.62
ADRM1	Q16186	0.00717887	0.00776685	2.55	2.5
ALDH18A1	P54886	0.00962226	0.00531281	2.55	2.96
CLIC1	O00299	0.0235092	0.0682164	2.55	1.83
CPNE2	Q96FN4	0.0794438	0.323222	2.55	1.26
CTNND1	O60716	0.00409215	0.00436843	2.55	2.51
DNMBP	Q6XZF7	0.00835813	0.00713662	2.55	2.66
EIF4G1	Q04637	0.0264147	0.0286775	2.55	2.49
INCENP	Q9NQS7	0.00283133	0.00198171	2.55	2.77
CTBP2	P56545	0.0039944	0.00344673	2.54	2.63
FABP7	O15540	0.0180815	0.11462	2.54	1.39
GMEB1	Q9Y692	0.00492117	0.000526866	2.54	4.24
HMG20A	Q9NP66	0.000633759	0.000701772	2.54	2.49
IDH3B	O43837	0.00106996	0.00108756	2.54	2.53
NPM3	O75607	0.00309916	0.00420087	2.54	2.36
RBL2	Q08999	0.0355305	0.00451291	2.54	4.4
YBX1	P67809	0.000677174	0.000654532	2.54	2.56
ZW10	O43264	0.0766274	0.074049	2.54	2.58
DOCK1	Q14185	0.000277361	0.00011663	2.53	3.06
ANXA2	P07355	0.00055817	0.000509032	2.53	2.58
POLE3	Q9NRF9	0.000604676	0.000389674	2.53	2.78
NUP155	O75694	9.34e-05	0.000109763	2.52	2.43
ACBD5	Q5T8D3	0.0100509	0.0490088	2.52	1.61
MCAM	P43121	0.00192312	0.00110258	2.52	2.87
PRKAA1	Q13131	0.00557518	0.00913973	2.52	2.23
BRWD1	Q9NSI6	0.00317875	0.00579218	2.51	2.18
CCNB1	P14635	0.000822153	0.00044519	2.51	2.88
SLC12A2	P55011	0.0172622	0.0275712	2.51	2.2
NPAS3	Q8IXF0	0.000100062	5.71e-05	2.5	2.82
ACACA	Q13085	0.00023127	0.00203731	2.5	1.54
GNAS	Q5JWF2	0.000537024	0.000390738	2.5	2.68
PA2G4	Q9UQ80	0.00037962	0.000571233	2.5	2.29
SARS2	Q9NP81	0.000211292	0.000566367	2.5	2.01
XRCC4	Q13426	0.00881898	0.00527091	2.5	2.84
MTHFD1L	Q6UB35	0.000408363	0.000678512	2.49	2.23
TTF2	Q9UNY4	0.00530215	0.00194328	2.49	3.16
TIPIN	Q9BVW5	0.00267276	0.000738956	2.48	3.32
UMPS	P11172	0.000640455	0.0187496	2.48	1.1
EIF5A	P63241	0.000145333	0.000178192	2.47	2.36
CPNE1	Q99829	0.00511143	0.00287677	2.46	2.83
MYH14	Q7Z406	0.000271772	0.0003941	2.46	2.26
PPP4R3A	Q6IN85	0.406224	0.80381	2.46	0.709
SMPD4	Q9NXE4	0.00373637	0.00274673	2.46	2.65
TARDBP	Q13148	0.000177716	0.000113535	2.45	2.7
BCKDK	O14874	0.00904904	0.00561601	2.45	2.76
DAB2IP	Q5VWQ8	0.000580187	0.00157846	2.45	1.95
DCUN1D1	Q96GG9	0.037548	0.557382	2.45	0.541
DTX3	Q8N9I9	0.0008378	0.00100803	2.45	2.35
FASN	P49327	0.000279749	0.000713953	2.45	1.99
MMGT1	Q8N4V1	0.000437275	0.000415006	2.45	2.48
RABL3	Q5HYI8	0.0071023	0.154277	2.45	0.921
B2M	P61769	0.0269071	0.0911597	2.44	1.63
CAMK2D	Q13557	0.192972	0.0620829	2.44	3.91
DAAM1	Q9Y4D1	0.000854923	0.000765725	2.44	2.5
NFRKB	Q6P4R8	0.00106618	0.000607518	2.44	2.77
PNPLA1	Q8N8W4	0.00659696	0.0100861	2.44	2.19
STXBP3	O00186	0.00155485	0.00134377	2.44	2.52
CAPN5	O15484	0.000227626	0.000232132	2.43	2.42
FAM120C	Q9NX05	0.00926638	0.00469788	2.43	2.88
LMNA	P02545	0.000156461	0.000194571	2.42	2.31
POLB	P06746	0.000111355	2.85e-05	2.42	3.23
BHLHE40	O14503	0.000570664	0.00108697	2.42	2.1
PRRC2A	P48634	0.00270698	0.00256011	2.42	2.45
ATRIP	Q8WXE1	0.000645594	0.00184355	2.41	1.9
HIRIP3	Q9BW71	0.00747181	0.00433246	2.41	2.76
POU2F1	P14859	0.00904966	0.027915	2.41	1.78
PTPRZ1	P23471	0.00126012	0.00177203	2.41	2.23
RBM4B	Q9BQ04	0.0035599	0.00348715	2.41	2.42
SMAD1	Q15797	0.00413607	0.00126724	2.41	3.18
ARRB1	P49407	0.114939	0.0952209	2.4	2.59
VPS50	Q96JG6	0.0104193	0.00720895	2.4	2.64
POLG	P54098	0.000114232	0.000119625	2.39	2.36
C3orf38	Q5JPI3	0.00210398	0.00095889	2.39	2.86
INTS8	Q75QN2	0.0083485	0.00731965	2.39	2.47
PFN2	P35080	0.0127644	0.0152538	2.39	2.28
PLEC	Q15149	0.000738881	0.00232321	2.39	1.84
RFX2	P48378	0.24444	0.858979	2.39	0.337
ACAD10	Q6JQN1	0.321453	0.41997	2.38	1.9
ATAD2B	Q9ULI0	0.000568305	0.000260932	2.38	2.82
CCNE1	P24864	0.0034344	0.000385123	2.38	3.92
CHD1L	Q86WJ1	0.000212459	0.000199537	2.38	2.41
FOXJ3	Q9UPW0	0.00918482	0.0151563	2.38	2.09
TPM1	P09493	0.000891369	0.00107118	2.38	2.28
TRMT61B	Q9BVS5	0.00651446	0.00267269	2.38	2.95
ZNF8	P17098	0.302741	0.409277	2.38	1.86
ATM	Q13315	0.0581138	0.0711556	2.37	2.21
EIF3G	O75821	0.000743375	0.00125913	2.37	2.1
GAP43	P17677	0.00539228	0.00429044	2.37	2.51
GNB4	Q9HAV0	0.00583318	0.00454809	2.36	2.51
PRORP	O15091	0.00269456	0.0031511	2.36	2.28
ELMO2	Q96JJ3	0.016134	0.0132268	2.35	2.48
LMNB2	Q03252	0.000638914	0.0012059	2.35	2.04
TOP3B	O95985	0.000362452	0.000254541	2.35	2.54
UQCRC1	P31930	0.00320839	0.0119162	2.35	1.7
GLI3	P10071	0.00178566	0.000625489	2.34	2.96
LMNB1	P20700	0.000215783	0.000296236	2.34	2.19
MAPK3	P27361	0.000777406	0.0153003	2.34	1.14
PIAS3	Q9Y6X2	0.00440589	0.00489928	2.34	2.28
SCRIB	Q14160	0.00109218	0.00101081	2.34	2.38
TFRC	P02786	0.0427911	0.056496	2.34	2.13
C8orf82	Q6P1X6	0.00359412	0.00118471	2.33	3.01
COPS2	P61201	0.00370955	0.00317134	2.33	2.42
ECM1	Q16610	0.00811156	0.0130927	2.33	2.06
EMC2	Q15006	0.00261992	0.00290557	2.33	2.27
FOXJ2	Q9P0K8	0.00430183	0.00953433	2.33	1.91
INPPL1	O15357	0.000364714	0.000307441	2.33	2.42
PDIA4	P13667	0.0161468	0.457783	2.33	0.517
ZBTB10	Q96DT7	0.00643295	0.0104168	2.33	2.07
MACROD1	Q9BQ69	0.00778227	0.00296374	2.32	2.93
ZZZ3	Q8IYH5	0.1105	0.184248	2.32	1.84
RBM12B	Q8IXT5	0.000141317	3.26e-05	2.31	3.16
EIF3A	Q14152	0.00241811	0.00311232	2.31	2.18
MTHFD2	P13995	0.0080025	0.00500042	2.31	2.59
PSMA7	O14818	0.0011692	0.00100406	2.31	2.39
UBAP2L	Q14157	0.0134295	0.0315925	2.31	1.81
ARHGEF7	Q14155	0.0727007	0.155997	2.3	1.68
EEF1G	P26641	0.000658479	0.000324998	2.3	2.69
RBM23	Q86U06	0.0136057	0.016258	2.3	2.19
USP34	Q70CQ2	0.0479214	0.414773	2.3	0.778
ATF3	P18847	0.0105649	0.00403066	2.29	2.91
CTNNA1	P35221	0.0011146	0.00161767	2.29	2.1
EARS2	Q5JPH6	0.154155	0.103172	2.29	2.73
MORC3	Q14149	0.0155339	0.0175717	2.29	2.21
RACK1	P63244	0.00160254	0.00200851	2.29	2.18
SETD1A	O15047	0.00240454	0.000672787	2.29	3.06
VPS51	Q9UID3	0.00318171	0.00284802	2.29	2.35
GTF2I	P78347	0.000254771	0.000136716	2.28	2.61
CDC45	O75419	0.0115664	0.0105546	2.28	2.33
DNAJB1	P25685	0.000726921	0.000378972	2.28	2.64
ITCH	Q96J02	0.103839	0.0824716	2.28	2.49
LIG3	P49916	0.000672035	0.000657041	2.28	2.29
MLEC	Q14165	0.00755248	0.008392	2.28	2.22
NLE1	Q9NVX2	0.0526749	0.0842801	2.28	1.94
NPM1	P06748	0.000319549	0.000665988	2.28	1.94
TOR1AIP1	Q5JTV8	0.05973	0.101713	2.28	1.87
TP53	P04637	0.000402126	0.000442364	2.28	2.23
ZNF217	O75362	0.067026	0.103352	2.28	1.94
COQ5	Q5HYK3	0.0433565	0.0367078	2.27	2.39
ZNF134	P52741	0.0193703	0.0223126	2.27	2.18
ACSL3	O95573	0.000647271	0.000826035	2.26	2.14
CDC16	Q13042	0.00505863	0.0092066	2.26	1.94
KLC1	Q07866	0.000669857	0.000571237	2.26	2.34
RALGAPA2	Q2PPJ7	0.171133	0.749915	2.26	0.475
RNF40	O75150	0.00274369	0.00380246	2.26	2.09
ARPC1B	O15143	0.00238227	0.00214187	2.25	2.31
C5orf24	Q7Z6I8	0.163461	0.136062	2.25	2.44
EEF1B2	P24534	0.0071527	0.00372795	2.25	2.64
OAS3	Q9Y6K5	0.00221798	0.00243532	2.25	2.2
PRRC2C	Q9Y520	0.0351495	0.0297123	2.25	2.36
RTF2	Q9BY42	0.0120666	0.00895084	2.25	2.43
LIN9	Q5TKA1	0.00101664	0.000147214	2.24	3.43
ATXN10	Q9UBB4	0.011574	0.016114	2.24	2.05
HOXA3	O43365	0.0140258	0.00890651	2.24	2.52
INTS14	Q96SY0	0.000280119	0.00026144	2.24	2.27
CYP51A1	Q16850	0.157212	0.21836	2.23	1.89
KLF16	Q9BXK1	0.00632088	0.00365124	2.23	2.55
LDB1	Q86U70	0.132749	0.109719	2.23	2.41
PDHA1	P08559	0.0119678	0.0822593	2.23	1.24
CHMP2A	O43633	0.0476428	0.0638587	2.22	2.01
KCTD15	Q96SI1	0.00174145	0.000585924	2.22	2.84
NUP88	Q99567	0.00016365	0.000138771	2.21	2.29
ACAA1	P09110	0.0283186	0.0275076	2.21	2.23
CTNNA2	P26232	0.000722819	0.000965056	2.21	2.07
MRPL50	Q8N5N7	0.0783841	0.0881587	2.21	2.12
PSMC4	P43686	0.0299804	0.0353151	2.21	2.1
TMPO	P42166	0.00588501	0.00836329	2.21	2.03
WASF1	Q92558	0.00979325	0.0064801	2.21	2.45
YLPM1	P49750	0.00492596	0.000818441	2.21	3.35
ABCF3	Q9NUQ8	0.000661129	0.00153626	2.2	1.82
ATF1	P18846	0.0358838	0.01474	2.2	2.84
DNA2	P51530	0.00533771	0.0106393	2.2	1.85
GSTP1	P09211	0.0514008	0.400913	2.2	0.787
POLR3G	O15318	0.0026262	0.00245053	2.2	2.24
RBL1	P28749	0.000313855	7.88e-05	2.19	2.95
CEBPB	P17676	0.087192	0.273269	2.19	1.27
ELMO1	Q92556	0.000558981	0.000258254	2.19	2.59
HRAS	P01112	0.00191146	0.000692943	2.19	2.76
NUP93	Q8N1F7	0.00340256	0.00689412	2.19	1.84
AGPS	O00116	0.00383594	0.00471952	2.18	2.07
CCDC127	Q96BQ5	0.402869	0.294604	2.18	2.8
ETV1	P50549	0.0152629	0.195006	2.18	0.889
G3BP2	Q9UN86	0.000201489	0.000313492	2.18	1.98
IPO4	Q8TEX9	0.00462668	0.00680124	2.18	1.98
NIPSNAP2	O75323	0.000204731	0.000214291	2.18	2.16
OPHN1	O60890	0.00119077	0.0012988	2.18	2.14
QSER1	Q2KHR3	0.000886269	0.00155455	2.18	1.92
SH3PXD2B	A1X283	0.0017405	0.000675445	2.18	2.7
TWNK	Q96RR1	0.0362044	0.187643	2.18	1.16
NRF1	Q16656	0.000319215	0.000331028	2.17	2.15
SPTA1	P02549	0.167399	0.26775	2.17	1.67
POLR3C	Q9BUI4	0.00111372	0.000504715	2.16	2.58
POR	P16435	0.0306662	0.0461712	2.16	1.91
EMC8	O43402	0.00246173	0.00165001	2.15	2.36
HES1	Q14469	0.0453074	0.0261833	2.15	2.54
LSM14B	Q9BX40	0.12899	0.323518	2.15	1.29
TTC7B	Q86TV6	0.00532845	0.00668766	2.15	2.03
ARPC1A	Q92747	0.00548718	0.0148367	2.14	1.66
ATL3	Q6DD88	0.107456	0.142705	2.14	1.9
EIF3E	P60228	0.03818	0.13988	2.14	1.33
GIGYF2	Q6Y7W6	0.000404507	0.00120125	2.14	1.68
NUP133	Q8WUM0	0.000306441	0.000284908	2.14	2.17
SDC1	P18827	0.00784867	0.0313302	2.14	1.47
TEAD3	Q99594	0.00272824	0.00511185	2.14	1.84
TFEB	P19484	0.00153333	0.00151843	2.14	2.15
NUP58	Q9BVL2	0.000217527	0.000163864	2.13	2.26
ARHGAP26	Q9UNA1	0.0291922	0.0315705	2.13	2.08
ILKAP	Q9H0C8	0.00383347	0.00344707	2.13	2.19
PIAS1	O75925	0.0145252	0.0110573	2.13	2.29
PSMD11	O00231	0.00862894	0.0486675	2.13	1.31
RANBP2	P49792	0.000443305	0.000467946	2.13	2.11
EIF4E2	O60573	0.000904934	0.00277442	2.12	1.64
FN1	P02751	0.109768	0.0757421	2.12	2.44
FOXRED1	Q96CU9	0.0810916	0.088552	2.12	2.05
PRKAR1A	P10644	0.0304873	0.028009	2.12	2.17
SPECC1	Q5M775	0.00406655	0.0353558	2.12	1.19
ACTR1A	P61163	0.00568609	0.00648365	2.11	2.04
CLPB	Q9H078	0.00591509	0.0089855	2.11	1.9
CUL5	Q93034	0.00630485	0.00684303	2.11	2.07
G3BP1	Q13283	0.0033075	0.00647728	2.11	1.79
TCF12	Q99081	0.000404021	0.000215676	2.11	2.42
EIF3CL	B5ME19	0.00129907	0.000946096	2.1	2.25
EML3	Q32P44	0.00100873	0.000446583	2.1	2.52
INTS13	Q9NVM9	0.000311125	0.000360397	2.1	2.04
NUP188	Q5SRE5	0.00245719	0.0019017	2.1	2.23
PPIA	P62937	0.00171977	0.00360463	2.1	1.76
RFX1	P22670	0.00497903	0.00910979	2.1	1.81
SEC23A	Q15436	0.000684912	0.00101901	2.1	1.92
ATP6V1A	P38606	0.0671	0.126378	2.09	1.64
MVK	Q03426	0.0326798	0.0166014	2.09	2.53
POLE4	Q9NR33	0.0504915	0.0335854	2.09	2.37
TOMM7	Q9P0U1	0.00967969	0.00251799	2.09	2.9
AASDHPPT	Q9NRN7	0.134536	0.282417	2.08	1.4
BIN3	Q9NQY0	0.0156661	0.00481713	2.08	2.81
FUS	P35637	0.00933648	0.0124119	2.08	1.93
PCBP1	Q15365	0.00048277	0.00085556	2.08	1.84
PSMD7	P51665	0.0840396	0.086184	2.08	2.07
PSPC1	Q8WXF1	0.000459668	0.000397468	2.08	2.15
QKI	Q96PU8	0.000269591	0.000197879	2.08	2.23
DTX3L	Q8TDB6	0.00649731	0.00633332	2.07	2.08
MTX1	Q13505	0.000673185	0.000634399	2.07	2.1
MVB12A	Q96EY5	0.00477407	0.0013337	2.07	2.8
MYBL2	P10244	0.0045962	0.00178043	2.07	2.58
TBC1D24	Q9ULP9	0.00524003	0.00119812	2.07	2.93
EIF3B	P55884	0.0133031	0.0480784	2.06	1.42
KCTD1	Q719H9	0.00957884	0.00111249	2.06	3.44
MRPL13	Q9BYD1	0.00523597	0.00328319	2.06	2.31
PLAA	Q9Y263	0.0736731	0.0764144	2.06	2.04
SNX27	Q96L92	0.0256599	0.0359127	2.06	1.87
SUB1	P53999	0.00219263	0.00153634	2.06	2.24
DCUN1D5	Q9BTE7	0.00468036	0.00752518	2.05	1.82
ORC2	Q13416	0.00157437	0.000931778	2.05	2.31
RPS21	P63220	0.00103955	0.00160941	2.05	1.86
SAMD9	Q5K651	0.00482226	0.00203374	2.05	2.51
VPS28	Q9UK41	0.00369734	0.00349039	2.05	2.08
XRCC1	P18887	0.000546512	0.000293714	2.05	2.35
GPI	P06744	0.00270623	0.218758	2.04	0.509
LAP3	P28838	0.133411	0.115385	2.04	2.17
PAXIP1	Q6ZW49	0.0103526	0.00781375	2.04	2.19
TFAP4	Q01664	0.000618427	0.000650031	2.04	2.02
USP10	Q14694	0.000451533	0.000448186	2.04	2.04
ECI2	O75521	0.000476891	0.00106143	2.03	1.7
EZR	P15311	0.0195081	0.0457798	2.03	1.58
LDB2	O43679	0.00176501	0.00115617	2.03	2.23
MT-ND1	P03886	0.09245	0.411329	2.03	0.869
NDUFA10	O95299	0.0206971	0.0335431	2.03	1.76
NFAT5	O94916	0.0984409	0.0285645	2.03	3.08
PACSIN3	Q9UKS6	0.00397248	0.00621393	2.03	1.82
RAC1	P63000	0.000755727	0.000584202	2.03	2.15
EIF3H	O15372	0.0402154	0.0419758	2.02	1.99
G6PD	P11413	0.0203243	0.316826	2.02	0.661
LASP1	Q14847	0.0416157	0.197807	2.02	1.09
NUP42	O15504	0.000370051	0.000359128	2.02	2.03
PIAS4	Q8N2W9	0.0148975	0.010891	2.02	2.2
PROX1	Q92786	0.000771525	0.00102739	2.02	1.89
SLC25A24	Q6NUK1	0.00393764	0.00400662	2.02	2.01
WARS1	P23381	0.00758087	0.054898	2.02	1.15
HMGB2	P26583	0.000725514	0.000229247	2.01	2.59
HUWE1	Q7Z6Z7	0.0012224	0.0100248	2.01	1.21
INTS10	Q9NVR2	0.000350187	0.000286943	2.01	2.1
NTHL1	P78549	0.0150739	0.00864652	2.01	2.32
OGG1	O15527	0.0029741	0.000591512	2.01	2.91
PSMD3	O43242	0.0213082	0.0522552	2.01	1.53
SEC24C	P53992	0.00108877	0.000761631	2.01	2.18
TIMELESS	Q9UNS1	0.0023057	0.000794009	2.01	2.57
TNPO1	Q92973	0.029795	0.022686	2.01	2.18
TBX2	Q13207	0.00125075	0.000179473	2	3.08
COL4A2	P08572	0.00160965	0.000786226	2	2.35
KRT6B	P04259	0.269676	0.601236	2	-0.896
MTM1	Q13496	0.0541392	0.0336093	2	2.33
NME1	P15531	0.00629356	0.0117791	2	1.7
NUP210	Q8TEM1	0.000322569	0.000246251	2	2.12
OLIG2	Q13516	0.00075559	0.000308502	2	2.44
PSMC3	P17980	0.00977225	0.029155	2	1.49
RBX1	P62877	0.0884254	0.0773965	2	2.1
TFCP2	Q12800	0.000369987	0.000102146	1.99	2.64
AAAS	Q9NRG9	0.009901	0.0119385	1.99	1.9
AARS2	Q5JTZ9	0.256046	0.835317	1.99	0.339
DECR1	Q16698	0.000855887	0.000763922	1.99	2.04
KDM2B	Q8NHM5	0.00542398	0.00249303	1.99	2.39
KHSRP	Q92945	0.00221872	0.00340944	1.99	1.8
METTL15	A6NJ78	0.000581076	0.000390899	1.99	2.17
PAICS	P22234	0.0097366	0.00609217	1.99	2.24
PTPRG	P23470	0.00422068	0.00461849	1.99	1.94
RPSA	P08865	0.00126124	0.00235571	1.99	1.72
TRIM33	Q9UPN9	0.0115387	0.0106379	1.99	2.03
PRKRA	O75569	0.00304958	0.00156382	1.98	2.31
SOX6	P35712	0.0199993	0.0865568	1.98	1.24
ANAPC7	Q9UJX3	0.000519208	0.000583743	1.97	1.92
DOCK9	Q9BZ29	0.0052013	0.0060177	1.97	1.9
MRPL37	Q9BZE1	0.0275437	0.0351688	1.97	1.83
NME4	O00746	0.00772213	0.00395358	1.97	2.33
NUP62	P37198	0.00104694	0.00044268	1.97	2.39
PKN2	Q16513	0.000891501	0.000773866	1.97	2.03
BZW2	Q9Y6E2	0.00180743	0.00179763	1.96	1.96
INTS9	Q9NV88	0.117307	0.108694	1.96	2.02
CTDSPL2	Q05D32	0.0913337	0.0569853	1.95	2.3
NUP43	Q8NFH3	0.00137765	0.00133166	1.95	1.96
PLCB3	Q01970	0.00821751	0.00588346	1.95	2.12
RAB7A	P51149	0.0280115	0.738352	1.95	0.222
RBFOX2	O43251	0.00416684	0.00712895	1.95	1.71
GSTK1	Q9Y2Q3	0.0228482	0.0669063	1.94	1.38
NUP54	Q7Z3B4	0.00260503	0.00269467	1.94	1.92
NXT2	Q9NPJ8	0.0163225	0.0539782	1.94	1.36
PCYT1A	P49585	0.0006149	0.000500319	1.94	2.04
UHRF1	Q96T88	0.000986679	0.000715945	1.94	2.09
UQCC1	Q9NVA1	0.0699812	0.0543981	1.94	2.12
UQCRC2	P22695	0.00157908	0.00215658	1.94	1.8
COX20	Q5RI15	0.0467948	0.122052	1.93	1.36
MRPL1	Q9BYD6	0.0968802	0.050713	1.93	2.43
NARS1	O43776	0.00397214	0.00430859	1.93	1.89
NUP107	P57740	0.000356437	0.000237064	1.93	2.11
PLCG1	P19174	0.000520855	0.000924662	1.93	1.7
RAP2C	Q9Y3L5	0.0165575	0.0291375	1.93	1.64
RCOR2	Q8IZ40	0.00505242	0.00419585	1.93	2.01
ZMAT4	Q9H898	0.211708	0.652791	1.93	-0.642
ACTR8	Q9H981	0.00367771	0.00173352	1.92	2.29
EGR1	P18146	0.00294266	0.00275388	1.92	1.95
HK1	P19367	0.0379483	0.0965035	1.92	1.39
MRPL45	Q9BRJ2	0.0114365	0.00965418	1.92	2
OLA1	Q9NTK5	0.0565813	0.060405	1.92	1.88
PHGDH	O43175	0.0141781	0.0169239	1.92	1.83
RCOR3	Q9P2K3	0.0164712	0.0293354	1.92	1.63
SUPT16H	Q9Y5B9	0.000367693	0.000240032	1.92	2.11
TMOD2	Q9NZR1	0.00402219	0.00212903	1.92	2.24
TOMM40	O96008	0.0640929	0.0700139	1.92	1.86
CLTC	Q00610	0.000922326	0.00231023	1.91	1.55
DDA1	Q9BW61	0.0365111	0.00643536	1.91	3.06
HMX2	A2RU54	0.0115671	0.0023089	1.91	2.83
IRS2	Q9Y4H2	0.232252	0.181836	1.91	2.18
MAP1LC3B2	A6NCE7	0.0863786	0.0305501	1.91	2.69
MBNL1	Q9NR56	0.165938	0.14906	1.91	2.01
MSI2	Q96DH6	0.000492736	0.00060991	1.91	1.82
PLEKHH2	Q8IVE3	0.346393	0.458465	1.91	-1.48
PRMT3	O60678	0.00920787	0.0213604	1.91	1.52
ACTC1	P68032	0.00123043	0.00177128	1.9	1.75
HMG20B	Q9P0W2	0.000444447	0.00076903	1.9	1.68
HSDL2	Q6YN16	0.0198389	0.00606146	1.9	2.59
INTS7	Q9NVH2	0.0015049	0.00157058	1.9	1.88
RPL7	P18124	0.00275634	0.00323631	1.9	1.83
SAR1A	Q9NR31	0.0854854	0.115049	1.9	1.69
SNX8	Q9Y5X2	0.000559918	0.00058212	1.9	1.88
TRAF2	Q12933	0.000545577	0.000679729	1.9	1.81
VPS4A	Q9UN37	0.0230527	0.0162733	1.9	2.09
ZBTB40	Q9NUA8	0.150068	0.652323	1.9	0.532
PHF1	O43189	0.000444575	2.92e-05	1.89	3.4
HDGFL3	Q9Y3E1	0.00750947	0.00703013	1.89	1.92
KRT4	P19013	0.285057	0.874002	1.89	0.263
MYO1C	O00159	0.000803083	0.001075	1.89	1.77
SLK	Q9H2G2	0.0417849	0.0200411	1.89	2.35
XRN2	Q9H0D6	0.0008193	0.00121896	1.89	1.73
ARPC4	P59998	0.000447161	0.000582276	1.88	1.77
ATR	Q13535	0.00260832	0.00461035	1.88	1.65
CCDC77	Q9BR77	0.642042	0.682625	1.88	1.65
DHX40	Q8IX18	0.0379095	0.0376405	1.88	1.89
EXOSC1	Q9Y3B2	0.00048603	0.000711609	1.88	1.73
MAPK7	Q13164	0.0325882	0.0037568	1.88	3.31
CHRAC1	Q9NRG0	0.131278	0.0826911	1.87	2.25
DNAJC7	Q99615	0.12814	0.0857609	1.87	2.2
E2F8	A0AVK6	0.0305668	0.0150981	1.87	2.28
EML4	Q9HC35	0.58739	0.545324	1.87	2.09
SRF	P11831	0.00135884	0.00129058	1.87	1.89
STK10	O94804	0.00079353	0.000390344	1.87	2.19
ZNF131	P52739	0.348361	0.920594	1.87	0.189
CDK1	P06493	0.00234929	0.00196906	1.86	1.94
DCAF7	P61962	0.0205061	0.0126329	1.86	2.12
EIF2D	P41214	0.000657841	0.000526345	1.86	1.95
ELOF1	P60002	0.030596	0.0346271	1.86	1.79
MTCH2	Q9Y6C9	0.00362841	0.00635542	1.86	1.62
PAPOLG	Q9BWT3	0.022824	0.0426318	1.86	1.54
EIF4B	P23588	0.205627	0.16845	1.85	2.05
RAB1C	Q92928	0.170468	0.271695	1.85	1.42
STRAP	Q9Y3F4	0.00209275	0.00204136	1.85	1.86
VRK1	Q99986	0.00121069	0.000580533	1.85	2.18
ZBTB47	Q9UFB7	0.000457332	1.13e-05	1.84	4.07
CENPK	Q9BS16	0.00466339	0.00175008	1.84	2.32
FAM120A	Q9NZB2	0.0256385	0.0175664	1.84	2.04
GGH	Q92820	0.00194607	0.0029424	1.84	1.67
HNRNPAB	Q99729	0.00115843	0.00152608	1.84	1.73
LONP2	Q86WA8	0.000585883	0.000331722	1.84	2.09
PTBP3	O95758	0.00382789	0.00217335	1.84	2.11
RAB18	Q9NP72	0.00259064	0.00181347	1.84	2
RAN	P62826	0.000379304	0.000193785	1.84	2.13
SEH1L	Q96EE3	0.000655501	0.0007013	1.84	1.82
SFXN5	Q8TD22	0.144311	0.392614	1.84	0.989
ATP2C1	P98194	0.0559456	0.141429	1.83	1.28
DBR1	Q9UK59	0.0313567	0.0161808	1.83	2.21
RBPJ	Q06330	0.00146813	0.000698723	1.83	2.17
SRGAP2	O75044	0.00338216	0.0030995	1.83	1.87
EEF1D	P29692	0.00053752	0.000180981	1.82	2.31
CAT	P04040	0.00858234	0.00340815	1.82	2.29
CLIC4	Q9Y696	0.0756219	0.0548079	1.82	2.04
COPS7A	Q9UBW8	0.00123153	0.000999406	1.82	1.9
MYH10	P35580	0.000759893	0.00121757	1.82	1.64
NUP214	P35658	0.00283076	0.00238177	1.82	1.89
NUP35	Q8NFH5	0.00805708	0.00920309	1.82	1.76
ODR4	Q5SWX8	0.184657	0.263392	1.82	1.49
OPA1	O60313	0.00044383	0.000501916	1.82	1.78
PRPSAP1	Q14558	0.00139613	0.00119634	1.82	1.88
SPAG5	Q96R06	0.261645	0.800062	1.82	0.383
ACOX1	Q15067	0.282065	0.583116	1.81	0.881
CTBP1	Q13363	0.00424118	0.00257435	1.81	2.04
DNAAF5	Q86Y56	0.000734498	0.0021285	1.81	1.42
NIPSNAP1	Q9BPW8	0.00120394	0.00120103	1.81	1.81
OSBPL2	Q9H1P3	0.004305	0.00412503	1.81	1.83
PMS2	P54278	0.0980932	0.0994717	1.81	1.8
SSRP1	Q08945	0.00104977	0.00069805	1.81	1.98
ABCF2	Q9UG63	0.00118186	0.00139101	1.8	1.73
CAPRIN1	Q14444	0.00635755	0.00912095	1.8	1.64
CD44	P16070	0.101364	0.087524	1.8	1.9
CDC42BPB	Q9Y5S2	0.00253802	0.00255459	1.8	1.8
CRCP	O75575	0.0869529	0.0341301	1.8	2.47
GET1	O00258	0.0413356	0.0115028	1.8	2.59
OTX1	P32242	0.0418923	0.0267173	1.8	2.06
PSMD2	Q13200	0.00876085	0.0382243	1.8	1.2
RNMT	O43148	0.0471872	0.0717536	1.8	1.57
SLC25A19	Q9HC21	0.292308	0.978052	1.8	-0.0442
DDX3X	O00571	0.000402829	0.000374733	1.79	1.82
DHX29	Q7Z478	0.00670037	0.00432838	1.79	1.99
KANK1	Q14678	0.00151095	0.000558256	1.79	2.24
MYO5C	Q9NQX4	0.00635653	0.00844524	1.79	1.67
PRRX2	Q99811	0.0508221	0.0168839	1.79	2.48
RASSF8	Q8NHQ8	0.0231814	0.0482005	1.79	1.44
SAMM50	Q9Y512	0.00675795	0.00761523	1.79	1.74
SND1	Q7KZF4	0.000849899	0.00221718	1.79	1.44
ZGRF1	Q86YA3	0.0413913	0.0687546	1.79	1.51
ZIC1	Q15915	0.000878766	0.000640602	1.79	1.92
ARCN1	P48444	0.0610703	0.109103	1.78	1.44
EMC1	Q8N766	0.000555506	0.000481328	1.78	1.84
POLDIP2	Q9Y2S7	0.0206838	0.00990604	1.78	2.17
POLR3A	O14802	0.000818209	0.000289982	1.78	2.23
POLR3E	Q9NVU0	0.00123046	0.000355522	1.78	2.35
PSMD1	Q99460	0.120303	0.165315	1.78	1.54
RAB5C	P51148	0.00950147	0.00936822	1.78	1.79
RPN1	P04843	0.00045232	0.000363024	1.78	1.87
ANAPC4	Q9UJX5	0.0472785	0.0318704	1.77	2
BRIP1	Q9BX63	0.0351794	0.0187099	1.77	2.13
EHD4	Q9H223	0.131371	0.116646	1.77	1.86
EIF3L	Q9Y262	0.00610501	0.0352733	1.77	1.1
MTG2	Q9H4K7	0.154461	0.12137	1.77	1.97
SEPTIN6	Q14141	0.00364841	0.00372492	1.77	1.76
SRSF2	Q01130	0.00957975	0.0158309	1.77	1.55
XPC	Q01831	0.00177961	0.00180396	1.77	1.77
CLK1	P49759	0.00163003	6.25e-05	1.76	-3.61
ORC4	O43929	0.104843	0.196858	1.76	1.32
POLR3B	Q9NW08	0.00400805	0.00135145	1.76	2.27
TXNDC5	Q8NBS9	0.00440536	0.0759445	1.76	0.783
ZNFX1	Q9P2E3	0.00742601	0.040394	1.76	1.1
HCFC1	P51610	0.000717705	0.000116651	1.75	2.61
ACTG1	P63261	0.00794538	0.00642995	1.75	1.85
APTX	Q7Z2E3	0.000620029	0.000358172	1.75	1.98
CHCHD3	Q9NX63	0.0432195	0.0681297	1.75	1.5
DDX43	Q9NXZ2	0.0740266	0.0736357	1.75	1.76
DRAP1	Q14919	0.00238067	0.00101734	1.75	2.12
HSPBP1	Q9NZL4	0.119813	0.830149	1.75	0.21
MAP1S	Q66K74	0.00821741	0.00222356	1.75	2.4
NUP205	Q92621	0.000464735	0.000387776	1.75	1.82
RAP1A	P62834	0.000647939	0.000595005	1.75	1.79
SPECC1L	Q69YQ0	0.131418	0.125083	1.75	1.79
TPM4	P67936	0.00413351	0.0051457	1.75	1.66
ARF5	P84085	0.0268866	0.0161142	1.74	2.01
BRSK2	Q8IWQ3	0.00196235	0.00265154	1.74	1.62
MYL6	P60660	0.000875762	0.00119312	1.74	1.62
PRAF2	O60831	0.0460807	0.0240994	1.74	2.12
RUNX1	Q01196	0.000693928	0.000459983	1.74	1.91
SCFD2	Q8WU76	0.00514124	0.00306989	1.74	1.97
TTK	P33981	0.113043	0.112543	1.74	1.75
VPS52	Q8N1B4	0.0045077	0.00820153	1.74	1.5
TREX1	Q9NSU2	0.000621175	0.000604936	1.73	1.74
FBXO38	Q6PIJ6	0.00693314	0.00398833	1.72	1.97
FDXR	P22570	0.0115682	0.055871	1.72	1.08
GNA13	Q14344	0.0444329	0.0391274	1.72	1.79
MCM8	Q9UJA3	0.0291146	0.0601413	1.72	1.37
NCOA5	Q9HCD5	0.00179804	0.000520724	1.72	2.27
PROSER1	Q86XN7	0.00774187	0.00259793	1.72	2.24
RCC1	P18754	0.00454123	0.00331594	1.72	1.86
ADD3	Q9UEY8	0.30854	0.47946	1.71	1.15
CLU	P10909	0.0920628	0.273546	1.71	1
HNRNPH3	P31942	0.00215263	0.00107733	1.71	2
KRT16	P08779	0.403534	0.982648	1.71	0.0428
CPSF6	Q16630	0.00407252	0.00388675	1.7	1.72
E2F5	Q15329	0.0777733	0.00655379	1.7	3.48
EEF2	P13639	0.00409364	0.00426743	1.7	1.69
MRPL11	Q9Y3B7	0.105992	0.136996	1.7	1.53
PI4KA	P42356	0.00289961	0.00297663	1.7	1.69
PSMC6	P62333	0.00570348	0.00595765	1.7	1.68
PSMD13	Q9UNM6	0.0024988	0.00491643	1.7	1.45
RPS6KA1	Q15418	0.179793	0.554584	1.7	0.689
HSP90AA1	P07900	0.00241819	0.0259857	1.69	0.923
RAB5A	P20339	0.000786722	0.000788641	1.69	1.69
RANBP1	P43487	0.0195644	0.0190896	1.69	1.7
SEC24B	O95487	0.0219759	0.046136	1.69	1.36
TPT1	P13693	0.115454	0.958071	1.69	0.0488
AHCY	P23526	0.175192	0.123646	1.68	1.97
AKAP6	Q13023	0.00142061	0.00142953	1.68	1.68
PSMA6	P60900	0.0328475	0.0427301	1.68	1.55
SAMHD1	Q9Y3Z3	0.0496743	0.0424215	1.68	1.77
PRDM15	P57071	0.00150292	5.1e-05	1.67	3.51
ANAPC5	Q9UJX4	0.0738816	0.0667269	1.67	1.74
CTC1	Q2NKJ3	0.0292763	0.0470228	1.67	1.44
INTS1	Q8N201	0.00103419	0.00132528	1.67	1.58
INTS2	Q9H0H0	0.00795518	0.00859899	1.67	1.63
PLOD1	Q02809	0.00722497	0.00128441	1.67	2.52
RFX3	P48380	0.135775	0.16963	1.67	1.51
SMAD3	P84022	0.0189954	0.0108085	1.67	1.94
UBXN4	Q92575	0.110069	0.0852546	1.67	1.85
CSTF3	Q12996	0.00123426	0.00287629	1.66	1.37
CTNND2	Q9UQB3	0.0582446	0.0549003	1.66	1.7
HMGN3	Q15651	0.00387421	0.00478091	1.66	1.58
NPEPPS	P55786	0.00455947	0.0997319	1.66	0.673
PEX11B	O96011	0.0118065	0.00832179	1.66	1.82
POTEI	P0CG38	0.199489	0.860242	1.66	0.208
SFXN1	Q9H9B4	0.0397905	0.0299833	1.66	1.81
ARHGEF6	Q15052	0.0182649	0.0189404	1.65	1.63
CMTR1	Q8N1G2	0.0029427	0.00424382	1.65	1.52
GAPDH	P04406	0.00111382	0.00126592	1.65	1.61
NXF1	Q9UBU9	0.000629282	0.000362396	1.65	1.87
OPLAH	O14841	0.257402	0.646668	1.65	-0.629
TRAF4	Q9BUZ4	0.00272476	0.00365711	1.65	1.54
ZNF598	Q86UK7	0.113105	0.10256	1.65	1.72
CCDC170	Q8IYT3	0.00149814	0.00166303	1.64	1.6
HMGB1	P09429	0.000917253	0.000341252	1.64	2.04
IGF2R	P11717	0.092596	0.0245027	1.64	2.54
IQCB1	Q15051	0.320426	0.383596	1.64	1.42
LAMC1	P11047	0.0593782	0.344379	1.64	0.698
PUM1	Q14671	0.00959533	0.00894204	1.64	1.67
TMX1	Q9H3N1	0.00209945	0.0020375	1.64	1.66
XPOT	O43592	0.00214732	0.000428098	1.64	2.37
ASCC3	Q8N3C0	0.00122638	0.000907988	1.63	1.74
LHX2	P50458	0.0515656	0.0267835	1.63	1.99
NUP160	Q12769	0.0431289	0.0207494	1.63	2.02
PARP9	Q8IXQ6	0.0535475	0.0435373	1.63	1.74
RAD23B	P54727	0.00109896	0.000961699	1.63	1.68
SHMT2	P34897	0.00109135	0.0131344	1.63	0.897
ACTB	P60709	0.00151621	0.00239184	1.62	1.46
EIF3M	Q7L2H7	0.00100313	0.00168586	1.62	1.44
INPP5A	Q14642	0.0856085	0.0209691	1.62	2.53
LMTK3	Q96Q04	0.0228216	0.00890276	1.62	2.08
MEOX2	P50222	0.00117887	0.00111657	1.62	1.64
POLR3D	P05423	0.00592112	0.00173975	1.62	2.17
PSMB1	P20618	0.298705	0.389932	1.62	1.32
SRBD1	Q8N5C6	0.00408869	0.00114258	1.62	2.17
TARS2	Q9BW92	0.00154613	0.00154168	1.62	1.62
FOXN2	P32314	0.0183486	0.0263736	1.61	1.46
INTS4	Q96HW7	0.00528432	0.00415766	1.61	1.7
NDC1	Q9BTX1	0.0159178	0.013926	1.61	1.67
SCAF8	Q9UPN6	0.00983172	0.0386445	1.61	1.1
HNRNPU	Q00839	0.000721055	0.000642536	1.6	1.64
TSG101	Q99816	0.00475738	0.0128991	1.6	1.25
CCT4	P50991	0.00333506	0.00333112	1.59	1.59
CDCA7L	Q96GN5	0.0193954	0.0121994	1.59	1.81
DCTN2	Q13561	0.0379418	0.0439352	1.59	1.52
DNAJC9	Q8WXX5	0.0051307	0.00253945	1.59	1.89
FBXW11	Q9UKB1	0.183353	0.661627	1.59	0.476
LRRC8A	Q8IWT6	0.0733573	0.125364	1.59	1.29
NEDD8	Q15843	0.00165995	0.00396001	1.59	1.29
SEC13	P55735	0.113086	0.161794	1.59	1.36
ALG5	Q9Y673	0.120578	0.0783084	1.58	1.87
CORO2B	Q9UQ03	0.00216222	0.00252866	1.58	1.52
HSP90B1	P14625	0.00266403	0.077499	1.58	0.619
LARS2	Q15031	0.0163083	0.0158138	1.58	1.59
NUDT21	O43809	0.00301591	0.00194091	1.58	1.75
TCF7L1	Q9HCS4	0.0181601	0.0441274	1.58	1.22
ZC3H15	Q8WU90	0.00500094	0.00575596	1.58	1.53
CSTF2	P33240	0.00658308	0.00368834	1.57	1.81
DNM3	Q9UQ16	0.00926132	0.0035577	1.57	1.99
HLTF	Q14527	0.00111041	0.000783979	1.57	1.7
HSP90AB1	P08238	0.00119416	0.00697097	1.57	1.04
HYCC1	Q9BYI3	0.00850362	0.0111717	1.57	1.46
MECOM	Q03112	0.0993329	0.177714	1.57	1.21
NDUFB9	Q9Y6M9	0.0186696	0.00791729	1.57	1.97
NES	P48681	0.0138174	0.17836	1.57	0.652
NXT1	Q9UKK6	0.0252473	0.0565751	1.57	1.22
OAS1	P00973	0.0558193	0.0733765	1.57	1.43
ACAP1	Q15027	0.00945483	0.0143534	1.56	1.39
CDCA7	Q9BWT1	0.0911939	0.185808	1.56	1.14
H3C15	Q71DI3	0.0477664	0.0112443	1.56	2.36
PRDX2	P32119	0.00648871	0.00900584	1.56	1.43
RNGTT	O60942	0.0015463	0.00179463	1.56	1.5
SDF4	Q9BRK5	0.00286574	0.00125451	1.56	1.89
SKIL	P12757	0.0257144	0.00290151	1.56	2.74
SOX21	Q9Y651	0.0192582	0.0811074	1.56	0.991
TM9SF3	Q9HD45	0.00970194	0.0106111	1.56	1.53
ZNF865	P0CJ78	0.120819	0.0460159	1.56	2.21
CCT2	P78371	0.00489769	0.00595894	1.55	1.48
CDKN2AIP	Q9NXV6	0.00971065	0.0113056	1.55	1.49
DDOST	P39656	0.000855147	0.000399867	1.55	1.84
NOL11	Q9H8H0	0.0709074	0.5358	1.55	0.448
RSU1	Q15404	0.00175274	0.00106847	1.55	1.74
SP4	Q02446	0.0790936	0.0441459	1.55	1.89
TET3	O43151	0.335081	0.129713	1.55	2.65
TMEM209	Q96SK2	0.00228281	0.00260231	1.55	1.5
WAPL	Q7Z5K2	0.000819558	0.000244082	1.55	2.02
ZNF316	A6NFI3	0.0012372	0.000803942	1.55	1.7
ACAD9	Q9H845	0.131425	0.100307	1.54	1.72
FDPS	P14324	0.117444	0.843053	1.54	-0.169
NELFCD	Q8IXH7	0.0349414	0.0159094	1.54	1.93
NT5DC2	Q9H857	0.000802541	0.000835558	1.54	1.53
NUP153	P49790	0.00133675	0.00254387	1.54	1.33
ZBTB43	O43298	0.00506581	0.000442404	1.54	2.7
GPC6	Q9Y625	0.00273447	0.000465885	1.53	2.29
MRPS28	Q9Y2Q9	0.124339	0.039373	1.53	2.31
RBM45	Q8IUH3	0.0576269	0.0151361	1.53	2.27
RPN2	P04844	0.000851541	0.00048058	1.53	1.74
RTEL1	Q9NZ71	0.00331161	0.00183849	1.53	1.76
SIPA1L1	O43166	0.00460744	0.00937687	1.53	1.28
USP4	Q13107	0.148982	0.0765469	1.53	2.01
ZBTB12	Q9Y330	0.00493555	0.00866937	1.53	1.33
ZRANB2	O95218	0.00866916	0.0174405	1.53	1.27
AGPAT1	Q99943	0.159627	0.0876392	1.52	1.95
IQGAP3	Q86VI3	0.0344204	0.0441195	1.52	1.41
LGALS1	P09382	0.00296332	0.00530497	1.52	1.32
TRIM47	Q96LD4	0.0971455	0.0908469	1.52	1.56
ZCCHC8	Q6NZY4	0.00198519	0.00181626	1.52	1.55
ACTR3	P61158	0.00307478	0.00154848	1.51	1.77
FANCM	Q8IYD8	0.00882295	0.0284159	1.51	1.1
GPRC5B	Q9NZH0	0.253312	0.586099	1.51	0.678
HCFC2	Q9Y5Z7	0.0931529	0.0274328	1.51	2.25
HNRNPA0	Q13151	0.00341377	0.00583376	1.51	1.33
MLH1	P40692	0.0217258	0.0182916	1.51	1.59
NMNAT1	Q9HAN9	0.0719101	0.0423573	1.51	1.8
SALL2	Q9Y467	0.0688155	0.100388	1.51	1.31
SWAP70	Q9UH65	0.0787051	0.110307	1.51	1.33
ARPC3	O15145	0.00934718	0.01218	1.5	1.4
KHDRBS1	Q07666	0.00294135	0.00118055	1.5	1.85
LARP1	Q6PKG0	0.0345012	0.0383461	1.5	1.46
LIMS1	P48059	0.0506236	0.11108	1.5	1.13
NCL	P19338	0.00154258	0.00239005	1.5	1.36
POLD1	P28340	0.0884861	0.0482287	1.5	1.85
ALDH2	P05091	0.0790381	0.0550377	1.49	1.7
CAPZA2	P47755	0.00917759	0.0185014	1.49	1.24
MRPS30	Q9NP92	0.113872	0.12028	1.49	1.46
MSANTD2	Q6P1R3	0.19893	0.0857424	1.49	2.17
PIH1D1	Q9NWS0	0.0363584	0.46219	1.49	0.414
SLC2A1	P11166	0.0511761	0.0801803	1.49	1.28
CGGBP1	Q9UFW8	0.00334756	0.000172303	1.48	2.89
CDR2L	Q86X02	0.177289	0.0652984	1.48	2.24
CPSF7	Q8N684	0.00169461	0.0014233	1.48	1.54
IRF3	Q14653	0.0155638	0.00450714	1.48	2.03
LZTS2	Q9BRK4	0.0279679	0.191288	1.48	0.722
MYH9	P35579	0.00179123	0.0029309	1.48	1.32
MYO5A	Q9Y4I1	0.00176575	0.002586	1.48	1.36
NIP7	Q9Y221	0.000997114	0.00182008	1.48	1.29
OCC1	Q8TAD7	0.0135656	0.00769962	1.48	1.71
PHF14	O94880	0.00170215	0.000652867	1.48	1.83
POU3F2	P20265	0.0644523	0.0857478	1.48	1.34
RPIA	P49247	0.00633198	0.0025897	1.48	1.83
ZNF462	Q96JM2	0.00807166	0.0105791	1.48	1.38
CCAR1	Q8IX12	0.152286	0.352941	1.47	0.891
CLOCK	O15516	0.201665	0.0304505	1.47	3.02
CTNNBL1	Q8WYA6	0.00142705	0.000966162	1.47	1.61
FUBP3	Q96I24	0.0664404	0.0519881	1.47	1.59
GMEB2	Q9UKD1	0.00909281	0.000232771	1.47	3.43
MTBP	Q96DY7	0.469436	0.652316	1.47	0.9
PHF21A	Q96BD5	0.00390436	0.0039325	1.47	1.46
TCF20	Q9UGU0	0.00228504	0.00080376	1.47	1.86
TLN2	Q9Y4G6	0.257919	0.697585	1.47	0.471
ZNF407	Q9C0G0	0.436398	0.122896	1.47	3.23
ZNF618	Q5T7W0	0.043407	0.0112009	1.47	2.16
BCAP31	P51572	0.0678363	0.120012	1.46	1.17
CAPZB	P47756	0.00333309	0.00477108	1.46	1.34
CBX5	P45973	0.00304451	0.00261013	1.46	1.51
HSPH1	Q92598	0.0435041	0.0564755	1.46	1.34
LIN7C	Q9NUP9	0.00492763	0.00634182	1.46	1.37
PALS1	Q8N3R9	0.00322294	0.00188605	1.46	1.66
SIPA1L2	Q9P2F8	0.00586402	0.120078	1.46	0.583
SLC25A23	Q9BV35	0.00694118	0.00630563	1.46	1.5
THRA	P10827	0.0760334	0.0388117	1.46	1.82
ASCC1	Q8N9N2	0.00862761	0.00697071	1.45	1.53
ECSIT	Q9BQ95	0.00427913	0.00303716	1.45	1.57
EIF3I	Q13347	0.0158156	0.044516	1.45	1.07
KIF21A	Q7Z4S6	0.00127914	0.0013329	1.45	1.43
PIP4P2	Q8N4L2	0.39712	0.837441	1.45	-0.338
PPP6R3	Q5H9R7	0.0711359	0.0832061	1.45	1.37
SOX3	P41225	0.0420134	0.0545159	1.45	1.33
APOBEC3B	Q9UH17	0.0186772	0.0116723	1.44	1.63
BAZ2B	Q9UIF8	0.0724398	0.0379114	1.44	1.78
HNRNPDL	O14979	0.00224775	0.00138225	1.44	1.61
RFX7	Q2KHR2	0.166279	0.753674	1.44	0.293
STAT3	P40763	0.168361	0.126798	1.44	1.63
TFDP1	Q14186	0.00118269	0.00022854	1.44	2.07
TXLNA	P40222	0.00207919	0.00670631	1.44	1.08
ALDH1B1	P30837	0.0612655	0.0300276	1.43	1.79
CISD2	Q8N5K1	0.00571774	0.00333422	1.43	1.63
COPG1	Q9Y678	0.00559467	0.0043181	1.43	1.52
DOCK10	Q96BY6	0.0428714	0.0417061	1.43	1.44
HDGFL2	Q7Z4V5	0.00759735	0.00540777	1.43	1.55
IRF2BP1	Q8IU81	0.180501	0.0922729	1.43	1.92
MACF1	O94854	0.281454	0.361643	1.43	1.19
PSMD6	Q15008	0.0137557	0.00539439	1.43	1.81
SP8	Q8IXZ3	0.00501928	0.00181639	1.43	1.81
SPART	Q8N0X7	0.00773838	0.00850408	1.43	1.39
TSPO	P30536	0.0125524	0.0131153	1.43	1.41
WDR74	Q6RFH5	0.0337967	0.0201453	1.43	1.66
ZNF622	Q969S3	0.0320676	0.258094	1.43	0.614
ASNS	P08243	0.00270919	0.00181321	1.42	1.56
MAFG	O15525	0.0621868	0.00431814	1.42	2.99
MDC1	Q14676	0.00749053	0.00272989	1.42	1.81
NR2F1	P10589	0.00247576	0.000272042	1.42	2.33
PRKD1	Q15139	0.00955569	0.065695	1.42	0.809
RBM7	Q9Y580	0.0443563	0.0302735	1.42	1.6
TXN	P10599	0.00353346	0.00397858	1.42	1.38
CDK2	P24941	0.00351964	0.00101619	1.41	1.88
CENPE	Q02224	0.00564415	0.0149475	1.41	1.1
COPB1	P53618	0.0213107	0.0547517	1.41	1.06
EYA4	O95677	0.0330628	0.0249396	1.41	1.53
GCN1	Q92616	0.00464793	0.00572207	1.41	1.34
INTS6	Q9UL03	0.00202861	0.00381341	1.41	1.22
KRIT1	O00522	0.433123	0.53978	1.41	1.09
DDX46	Q7L014	0.00154447	0.00329041	1.4	1.17
FDFT1	P37268	0.00320866	0.00256416	1.4	1.47
ORC5	O43913	0.00127999	0.000893954	1.4	1.52
PSMB5	P28074	0.160098	0.0740485	1.4	1.92
RAF1	P04049	0.0204916	0.121544	1.4	0.772
RPL15	P61313	0.00186169	0.00967256	1.4	0.938
RPL4	P36578	0.00568969	0.0100561	1.4	1.22
TAP2	Q03519	0.0557303	0.0620934	1.4	1.35
WDR76	Q9H967	0.00774088	0.00754904	1.4	1.41
YWHAQ	P27348	0.00145468	0.00387799	1.4	1.12
CLP1	Q92989	0.0139308	0.000371815	1.39	-3.26
MCM4	P33991	0.00150515	0.000738231	1.39	1.63
RPL5	P46777	0.00353253	0.0043455	1.39	1.32
TCF3	P15923	0.374419	0.261713	1.39	1.81
TCF7L2	Q9NQB0	0.0484298	0.0515226	1.39	1.36
ABCE1	P61221	0.010646	0.00817593	1.38	1.47
CAPZA1	P52907	0.00755309	0.0141751	1.38	1.17
CNOT1	A5YKK6	0.00151433	0.0016666	1.38	1.35
CSE1L	P55060	0.00351747	0.0160768	1.38	0.942
FAM98A	Q8NCA5	0.0127129	0.016142	1.38	1.3
IQGAP1	P46940	0.00538219	0.0291335	1.38	0.879
KRT17	Q04695	0.404907	0.471784	1.38	-1.18
L3MBTL2	Q969R5	0.0155272	0.214171	1.38	0.539
RAB35	Q15286	0.0143671	0.0159786	1.38	1.34
SCAMP3	O14828	0.177743	0.264698	1.38	1.11
SRP19	P09132	0.354723	0.368264	1.38	1.34
TEAD1	P28347	0.0118406	0.00879272	1.38	1.5
ALKBH5	Q6P6C2	0.253366	0.240503	1.37	1.42
CCT5	P48643	0.00334073	0.00790831	1.37	1.11
DCTN6	O00399	0.0133476	0.0409291	1.37	0.991
IARS2	Q9NSE4	0.0874433	0.0252624	1.37	2.06
NOP2	P46087	0.0539166	0.0780331	1.37	1.21
RDH14	Q9HBH5	0.00532825	0.00808824	1.37	1.24
TADA2A	O75478	0.120813	0.676258	1.37	0.323
TERF2IP	Q9NYB0	0.00152982	0.000821791	1.37	1.58
UBP1	Q9NZI7	0.00212957	0.000243106	1.37	2.22
CBS	P35520	0.113708	0.125826	1.36	1.31
LETM1	O95202	0.00213363	0.00145684	1.36	1.49
MEIS2	O14770	0.0473847	0.129379	1.36	0.939
VIM	P08670	0.00663477	0.175061	1.36	0.472
ACADSB	P45954	0.107374	0.017635	1.35	2.43
CUL2	Q13617	0.308777	0.623377	1.35	-0.621
FAF2	Q96CS3	0.00385524	0.00399608	1.35	1.34
GLUL	P15104	0.0364191	0.254491	1.35	0.605
HMBOX1	Q6NT76	0.00287363	0.00117187	1.35	1.66
IGKC	P01834	0.506448	0.474455	1.35	1.46
LYPLA1	O75608	0.0681834	0.0484126	1.35	1.51
MPV17L2	Q567V2	0.242641	0.986717	1.35	0.0177
MYL6B	P14649	0.032915	0.0312063	1.35	1.37
PHLDB1	Q86UU1	0.030507	0.0144848	1.35	1.66
SOX13	Q9UN79	0.00485585	0.188538	1.35	0.42
TMEM161A	Q9NX61	0.214329	0.14484	1.35	1.64
TPM3	P06753	0.0132799	0.0105307	1.35	1.43
XPO1	O14980	0.0122744	0.0152713	1.35	1.27
XRCC5	P13010	0.00216012	0.00124518	1.35	1.54
BRAT1	Q6PJG6	0.237204	0.427445	1.34	0.858
CHD5	Q8TDI0	0.161566	0.180736	1.34	1.27
KDM3B	Q7LBC6	0.00581165	0.00768199	1.34	1.25
SEL1L	Q9UBV2	0.335296	0.895716	1.34	-0.174
XRN1	Q8IZH2	0.00519479	0.0013724	1.34	1.83
ZMYND11	Q15326	0.0709583	0.0433674	1.34	1.58
ALG2	Q9H553	0.0085685	0.00422212	1.33	1.59
CDH2	P19022	0.0326532	0.0363651	1.33	1.29
CYBC1	Q9BQA9	0.00458721	0.00453286	1.33	1.33
HNRNPA1	P09651	0.0015801	0.00158277	1.33	1.33
NCBP2AS2	Q69YL0	0.0374797	0.00305978	1.33	2.57
PSMB3	P49720	0.11243	0.051971	1.33	1.76
PSMB4	P28070	0.173971	0.355188	1.33	0.853
RBMXL1	Q96E39	0.00995815	0.00210265	1.33	1.94
RPAP3	Q9H6T3	0.0607135	0.40131	1.33	0.5
SEC16A	O15027	0.246306	0.322188	1.33	1.11
SPTLC1	O15269	0.00258525	0.00441363	1.33	1.17
ALG12	Q9BV10	0.25923	0.0758631	1.32	2.32
GOLGA7	Q7Z5G4	0.0349737	0.022776	1.32	1.5
IGF2BP2	Q9Y6M1	0.114085	0.142995	1.32	1.19
IMMT	Q16891	0.00412785	0.00958755	1.32	1.07
MTSS2	Q765P7	0.0063971	0.00422386	1.32	1.46
SHCBP1	Q8NEM2	0.00321253	0.00351575	1.32	1.3
XRCC6	P12956	0.00309261	0.00148386	1.32	1.56
CCNYL1	Q8N7R7	0.0915443	0.0500104	1.31	1.62
FOXL2	P58012	0.00225152	0.00106149	1.31	1.56
HNRNPA3	P51991	0.00168859	0.00116799	1.31	1.42
IDH3G	P51553	0.0896654	0.164503	1.31	1.02
NEDD1	Q8NHV4	0.0283659	0.0341999	1.31	1.24
RDX	P35241	0.00553135	0.0175327	1.31	0.973
RFC5	P40937	0.0036787	0.00144482	1.31	1.63
RPLP2	P05387	0.0124839	0.0332892	1.31	0.992
SRSF9	Q13242	0.00259641	0.000776552	1.31	1.72
SURF1	Q15526	0.070507	0.914256	1.31	-0.064
ASB3	Q9Y575	0.0544484	0.0475107	1.3	1.36
BLM	P54132	0.0087847	0.00927087	1.3	1.28
DHX57	Q6P158	0.412512	0.801783	1.3	0.384
LARP4	Q71RC2	0.0409547	0.249878	1.3	0.612
NKX2-2	O95096	0.0251035	0.0125706	1.3	1.58
NSDHL	Q15738	0.0874332	0.149583	1.3	1.04
RAB3GAP2	Q9H2M9	0.0191923	0.0403048	1.3	1.05
ZNF580	Q9UK33	0.104907	0.263054	1.3	0.829
PRR3	P79522	0.0741776	0.0662232	1.29	1.34
STOML2	Q9UJZ1	0.00492018	0.0110322	1.29	1.05
TANC1	Q9C0D5	0.0110656	0.0554301	1.29	0.807
TBRG4	Q969Z0	0.0223091	0.018437	1.29	1.36
USF2	Q15853	0.13843	0.275302	1.29	0.893
ZNF320	A2RRD8	0.487342	0.360903	1.29	-1.73
BRD1	O95696	0.241682	0.528531	1.28	0.653
CDC42	P60953	0.0294094	0.0113318	1.28	1.66
KDM1A	O60341	0.00228432	0.00183793	1.28	1.35
PRKCE	Q02156	0.0664228	0.18896	1.28	0.828
PSMD14	O00487	0.0524588	0.478288	1.28	0.384
RCOR1	Q9UKL0	0.0157845	0.0256905	1.28	1.12
DNAJC13	O75165	0.0819416	0.0921749	1.27	1.21
ENGASE	Q8NFI3	0.0125869	0.00724429	1.27	1.47
HLA-A	P04439	0.00448455	0.0146444	1.27	0.944
MAN1A2	O60476	0.0149221	0.00925678	1.27	1.44
TUBGCP3	Q96CW5	0.00529836	0.00681426	1.27	1.19
DHX36	Q9H2U1	0.00196104	0.000800307	1.26	1.54
EXOSC8	Q96B26	0.316713	0.561991	1.26	0.705
NDUFAF4	Q9P032	0.0639688	0.0665133	1.26	1.25
RAB13	P51153	0.00458356	0.00296978	1.26	1.4
RXRB	P28702	0.0465107	0.00685623	1.26	2.14
TOP2A	P11388	0.00228103	0.0012879	1.26	1.44
VPS16	Q9H269	0.00397744	0.00311096	1.26	1.34
AARS1	P49588	0.19429	0.59022	1.25	0.479
ETFA	P13804	0.0534676	0.0661561	1.25	1.16
LMF2	Q9BU23	0.0323662	0.0339532	1.25	1.23
NDEL1	Q9GZM8	0.203126	0.122694	1.25	1.59
PIK3R4	Q99570	0.0304288	0.0344706	1.25	1.21
WDR6	Q9NNW5	0.108383	0.0457977	1.25	1.7
ASH2L	Q9UBL3	0.00545122	0.00133831	1.24	1.73
EMD	P50402	0.0024065	0.00112135	1.24	1.48
ETV6	P41212	0.0113107	0.00113912	1.24	2.15
H2AC21	Q8IUE6	0.0867339	0.0712162	1.24	1.33
PARP1	P09874	0.00227789	0.000741923	1.24	1.61
MSI1	O43347	0.00348341	0.00449859	1.23	1.15
GANAB	Q14697	0.0114385	0.110231	1.22	0.597
NAP1L4	Q99733	0.0567342	0.178272	1.22	0.769
PSMC5	P62195	0.00733877	0.00759788	1.22	1.21
PTBP1	P26599	0.00644119	0.00466835	1.22	1.32
RAD54B	Q9Y620	0.0914836	0.144529	1.22	1.01
AKAP9	Q99996	0.667654	0.911606	1.21	0.31
CSTF1	Q05048	0.0203005	0.0100799	1.21	1.45
EEF1A2	Q05639	0.00310232	0.000263377	1.21	2.11
ENDOD1	O94919	0.0340235	0.00651025	1.21	1.9
GSK3A	P49840	0.0093154	0.00941158	1.21	1.21
MYEF2	Q9P2K5	0.01231	0.00639047	1.21	1.43
RBM19	Q9Y4C8	0.0319032	0.0284868	1.21	1.25
TLN1	Q9Y490	0.090088	0.268038	1.21	0.716
TRIM26	Q12899	0.0516734	0.045734	1.21	1.26
ZNF189	O75820	0.167784	0.273472	1.21	0.924
CHEK1	O14757	0.0469364	0.0106651	1.2	1.83
DDX17	Q92841	0.00306794	0.00347563	1.2	1.17
KLF12	Q9Y4X4	0.00763202	0.458051	1.2	0.219
KLHDC8A	Q8IYD2	0.160826	0.147056	1.2	1.25
RPL14	P50914	0.00420196	0.0108108	1.2	0.947
TMED10	P49755	0.0259447	0.0396298	1.2	1.06
YTHDF1	Q9BYJ9	0.0757175	0.273713	1.2	0.655
YWHAG	P61981	0.0136657	0.0250691	1.2	1.02
ATIC	P31939	0.0233902	0.0470395	1.19	0.961
FBXL7	Q9UJT9	0.0895938	0.0616195	1.19	1.36
HNRNPA2B1	P22626	0.00294942	0.00218993	1.19	1.27
KMT2D	O14686	0.145389	0.272798	1.19	0.849
PARP16	Q8N5Y8	0.0541147	0.0585026	1.19	1.16
RHOC	P08134	0.0145566	0.0193792	1.19	1.1
SDF2	Q99470	0.00312213	0.00947398	1.19	0.903
TANC2	Q9HCD6	0.0381372	0.449701	1.19	-0.345
USP7	Q93009	0.00428123	0.00598911	1.19	1.1
ANAPC2	Q9UJX6	0.00492445	0.00286804	1.18	1.34
MRRF	Q96E11	0.11916	0.0916477	1.18	-1.31
NKRF	O15226	0.193319	0.0706663	1.18	1.8
RPL13A	P40429	0.00958722	0.0247524	1.18	0.917
RSF1	Q96T23	0.00295745	0.00112772	1.18	1.48
SOX5	P35711	0.0050357	0.0618673	1.18	0.583
TOMM22	Q9NS69	0.00559772	0.0397995	1.18	0.695
ZRSR2	Q15696	0.478872	0.562595	1.18	-0.96
COX6A1	P12074	0.0108021	0.0165879	1.17	1.04
DDX5	P17844	0.00558031	0.00970657	1.17	1.02
DGKA	P23743	0.0809551	0.0330858	1.17	1.57
DNMT3A	Q9Y6K1	0.00377809	0.00318702	1.17	1.21
HELLS	Q9NRZ9	0.00319832	0.0019717	1.17	1.32
NGEF	Q8N5V2	0.042926	0.0248772	1.17	1.38
SLC25A25	Q6KCM7	0.00819979	0.0119621	1.17	1.06
ARF3	P61204	0.00711577	0.00350749	1.16	1.37
ARPC2	O15144	0.0125151	0.0108511	1.16	1.2
BTAF1	O14981	0.0101119	0.00247012	1.16	1.64
CDC42SE1	Q9NRR8	0.0083458	0.00627659	1.16	1.24
KPNA3	O00505	0.00625329	0.00312707	1.16	1.38
PCGF1	Q9BSM1	0.00731849	0.00371448	1.16	1.37
SRGAP1	Q7Z6B7	0.0301746	0.0712142	1.16	0.878
CBFB	Q13951	0.0241736	0.0351733	1.15	1.03
MTX2	O75431	0.011356	0.0100687	1.15	1.19
PYCR1	P32322	0.0286398	0.0433458	1.15	1.01
RARS2	Q5T160	0.284122	0.194276	1.15	1.44
BANF1	O75531	0.0116391	0.00125167	1.14	1.94
CBX3	Q13185	0.00547596	0.00514726	1.14	1.16
CREBBP	Q92793	0.0520277	0.0402094	1.14	1.23
H1-4	P10412	0.116858	0.182348	1.14	0.927
MCM3	P25205	0.00972608	0.0119983	1.14	1.08
MYO19	Q96H55	0.0374821	0.0795354	1.14	0.89
PARG	Q86W56	0.0242721	0.0251619	1.14	1.13
ASCC2	Q9H1I8	0.0127381	0.00868064	1.13	1.24
CMAS	Q8NFW8	0.00585386	0.00245613	1.13	1.39
CREM	Q03060	0.0973953	0.0148708	1.13	2.04
EIF4G2	P78344	0.0293524	0.153995	1.13	0.62
JRK	O75564	0.10791	0.557195	1.13	0.362
MCM10	Q7L590	0.00544577	0.00786991	1.13	1.03
NELFE	P18615	0.0352157	0.0321793	1.13	1.16
UCK2	Q9BZX2	0.152448	0.061006	1.13	1.62
CCAR2	Q8N163	0.092188	0.100695	1.12	1.08
DCLK2	Q8N568	0.00498738	0.00594479	1.12	1.08
EPHA2	P29317	0.257545	0.126815	1.12	1.6
GPD2	P43304	0.0139017	0.0186563	1.12	1.03
LAMB2	P55268	0.0120848	0.168505	1.12	0.461
MAP4K2	Q12851	0.166161	0.171358	1.12	1.11
NONO	Q15233	0.00767521	0.0105492	1.12	1.03
PRKDC	P78527	0.00333615	0.00119217	1.12	1.42
RBBP5	Q15291	0.00891562	0.00252122	1.12	1.53
RRS1	Q15050	0.0113837	0.0377487	1.12	0.8
TIMM13	Q9Y5L4	0.0479567	0.00859278	1.12	1.82
CENPF	P49454	0.0046326	0.00290832	1.11	1.24
CENPH	Q9H3R5	0.173769	0.103322	1.11	1.4
EWSR1	Q01844	0.0477597	0.0387416	1.11	1.18
H3-7	Q5TEC6	0.00457449	0.00178783	1.11	1.39
PHOX2B	Q99453	0.252635	0.735467	1.11	0.305
TAPBP	O15533	0.00370352	0.00493699	1.11	1.03
TMED2	Q15363	0.293139	0.234963	1.11	1.27
ADD1	P35611	0.0187521	0.015703	1.1	1.15
CCT7	Q99832	0.0288095	0.142581	1.1	0.625
EEF1A1	P68104	0.00520937	0.00230595	1.1	1.34
MON2	Q7Z3U7	0.0100343	0.0093806	1.1	1.12
SMCO4	Q9NRQ5	0.0846088	0.0295785	1.1	1.56
UPF1	Q92900	0.0245491	0.0296489	1.1	1.04
YWHAZ	P63104	0.0987899	0.412739	1.1	0.485
ZNF367	Q7RTV3	0.1382	0.494847	1.1	-0.458
CDC20	Q12834	0.0157139	0.0188682	1.09	1.04
HLA-C	P10321	0.0123029	0.035079	1.09	0.809
LRWD1	Q9UFC0	0.00419067	0.00338425	1.09	1.15
MBOAT7	Q96N66	0.00966148	0.0101192	1.09	1.08
MDH2	P40926	0.0364507	0.0426903	1.09	1.04
MFN2	O95140	0.228437	0.340161	1.09	0.837
MICOS10	Q5TGZ0	0.339984	0.460699	1.09	0.827
RAC3	P60763	0.263145	0.131539	1.09	1.56
TIMMDC1	Q9NPL8	0.0491057	0.0366464	1.09	1.19
ZMYND8	Q9ULU4	0.00570202	0.00565658	1.09	1.09
CKB	P12277	0.0404665	0.0203002	1.08	1.32
COPS6	Q7L5N1	0.0208318	0.0110653	1.08	1.28
DIP2B	Q9P265	0.006095	0.00746658	1.08	1.03
HNRNPUL2	Q1KMD3	0.00675875	0.00772202	1.08	1.04
IPO5	O00410	0.0125529	0.034648	1.08	0.811
MT-CO2	P00403	0.0464987	0.111425	1.08	0.792
NSMCE1	Q8WV22	0.033333	0.061818	1.08	0.888
RPL18A	Q02543	0.0607436	0.130556	1.08	0.808
RPL34	P49207	0.116564	0.174365	1.08	0.898
TOP2B	Q02880	0.00490729	0.00274511	1.08	1.24
ZYX	Q15942	0.00654509	0.0130558	1.08	0.902
ATPAF1	Q5TC12	0.274472	0.74508	1.07	0.3
GET3	O43681	0.0141396	0.00555279	1.07	1.35
HNRNPUL1	Q9BUJ2	0.00389049	0.00347088	1.07	1.1
NFKB1	P19838	0.0328537	0.0144335	1.07	1.35
NR2C2	P49116	0.217448	0.122368	1.07	1.41
OTX2	P32243	0.0769191	0.0397792	1.07	1.33
PDF	Q9HBH1	0.250111	0.107482	1.07	1.62
PRDX6	P30041	0.00984608	0.00579669	1.07	1.22
AMOTL1	Q8IY63	0.0647929	0.165224	1.06	0.727
FAM76A	Q8TAV0	0.0513679	0.00620057	1.06	1.91
MPDU1	O75352	0.00602996	0.00438205	1.06	1.14
MUS81	Q96NY9	0.0909726	0.119165	1.06	0.955
RUVBL2	Q9Y230	0.00732645	0.0124457	1.06	0.926
SP3	Q02447	0.0103476	0.00411643	1.06	1.33
ADGRE5	P48960	0.0342168	0.115301	1.05	0.69
G6PC3	Q9BUM1	0.110191	0.284182	1.05	0.649
MYL12B	O14950	0.0118184	0.0142565	1.05	1
PAX6	P26367	0.00789779	0.0074803	1.05	1.07
SCAF11	Q99590	0.00933076	0.038401	1.05	0.709
ACO2	Q99798	0.372545	0.298235	1.04	1.23
ATP5F1D	P30049	0.175118	0.129369	1.04	1.19
CYFIP1	Q7L576	0.00894979	0.00744836	1.04	1.09
ERF	P50548	0.0459529	0.00329178	1.04	2.11
INO80C	Q6PI98	0.0251365	0.0106254	1.04	1.32
KRT6A	P02538	0.48792	0.587732	1.04	-0.801
MPRIP	Q6WCQ1	0.0320606	0.0555675	1.04	0.873
RPLP1	P05386	0.0607069	0.3173	1.04	0.475
SCAP	Q12770	0.0128477	0.0518575	1.04	0.69
UQCC2	Q9BRT2	0.0359446	0.011909	1.04	1.42
VDAC3	Q9Y277	0.0299669	0.0409139	1.04	0.944
YWHAE	P62258	0.0109367	0.0184398	1.04	0.902
ZNF451	Q9Y4E5	0.044339	0.0306608	1.04	1.16
ARL6IP5	O75915	0.0122969	0.00824349	1.03	1.14
ATP1B3	P54709	0.0866487	0.0384921	1.03	1.36
HNRNPF	P52597	0.00445908	0.00204339	1.03	1.24
KRT80	Q6KB66	0.0157421	0.0158713	1.03	1.03
MRPL24	Q96A35	0.087346	0.0725481	1.03	1.1
NDUFA11	Q86Y39	0.0156949	0.0119086	1.03	1.11
PUM3	Q15397	0.00496543	0.00728039	1.03	0.941
SLAIN1	Q8ND83	0.262527	0.047425	1.03	2.16
UBL5	Q9BZL1	0.471003	0.900828	1.03	0.174
DCTN4	Q9UJW0	0.22836	0.985593	1.02	-0.0141
H3-4	Q16695	0.239652	0.197259	1.02	1.14
KRT78	Q8N1N4	0.0296688	0.105289	1.02	0.663
MEN1	O00255	0.00764599	0.00312667	1.02	1.27
RSL1D1	O76021	0.032414	0.0462851	1.02	0.918
TRIP4	Q15650	0.0458397	0.0136269	1.02	1.45
TUBB2B	Q9BVA1	0.00629352	0.00882664	1.02	0.94
TUBB6	Q9BUF5	0.011517	0.0126215	1.02	0.994
UBA1	P22314	0.168362	0.712912	1.02	0.247
API5	Q9BZZ5	0.0869587	0.076989	1.01	1.06
B4GAT1	O43505	0.148586	0.0334059	1.01	1.74
HNRNPH2	P55795	0.224848	0.378832	1.01	0.703
MARK2	Q7KZI7	0.154146	0.105373	1.01	1.19
MAZ	P56270	0.0111418	0.00150789	1.01	1.64
NUDT16L1	Q9BRJ7	0.01909	0.00543808	1.01	1.4
PLEKHO1	Q53GL0	0.354401	0.353324	1.01	1.01
PPIB	P23284	0.0235621	0.0366472	1.01	0.889
RAPH1	Q70E73	0.136547	0.0711357	1.01	1.31
ZNF740	Q8NDX6	0.0287782	0.0240825	1.01	1.07
DDX11	Q96FC9	0.0523315	0.062307	1	0.947
DRG1	Q9Y295	0.0227874	0.0719549	1	0.696
IGF2BP3	O00425	0.0580002	0.133427	1	0.73
NOVA2	Q9UNW9	0.149353	0.730753	1	-0.213
SMAP	O00193	0.199188	0.428345	1	0.581
SMARCA1	P28370	0.0143621	0.0136052	1	1.02
SOX8	P57073	0.0800481	0.182476	1	0.704
ZNF35	P13682	0.669056	0.439621	1	1.85
ZNF862	O60290	0.0967305	0.0114048	1	1.93
FNDC3B	Q53EP0	0.0691572	0.109112	0.999	0.841
MAK16	Q9BXY0	0.0188651	0.0476123	0.998	0.758
PCNT	O95613	0.134915	0.747921	0.998	0.189
NVL	O15381	0.394868	0.715708	0.997	-0.412
SOX2	P48431	0.00810032	0.0347022	0.997	0.669
ATP5MG	O75964	0.0619714	0.0834887	0.996	0.896
H3C1	P68431	0.0205264	0.00825192	0.996	1.27
PCNA	P12004	0.166806	0.118165	0.994	1.16
ZNF644	Q9H582	0.148005	0.17842	0.993	0.908
HNRNPH1	P31943	0.0126167	0.0121917	0.992	1
POGK	Q9P215	0.0569577	0.0155694	0.992	1.46
SMC6	Q96SB8	0.0315848	0.0240624	0.991	1.07
BLVRA	P53004	0.0836167	0.0540863	0.987	1.15
KPNA6	O60684	0.0717259	0.0344642	0.987	1.25
STK32B	Q9NY57	0.0918186	0.10772	0.987	0.927
FUBP1	Q96AE4	0.112725	0.196221	0.986	0.763
PREX1	Q8TCU6	0.0213351	0.0127806	0.986	1.13
UBE2M	P61081	0.123311	0.251111	0.98	0.685
COL11A1	P12107	0.12703	0.0613165	0.979	1.29
NFATC4	Q14934	0.426101	0.284911	0.979	1.35
TNKS1BP1	Q9C0C2	0.462288	0.744587	0.978	0.423
SLC1A5	Q15758	0.284462	0.123659	0.977	1.51
POU3F3	P20264	0.0126966	0.0472247	0.974	0.667
SDHA	P31040	0.0452691	0.0227197	0.974	1.2
SP1	P08047	0.0195502	0.00967961	0.974	1.18
TMEM126B	Q8IUX1	0.0558844	0.0213018	0.974	1.31
ZNF219	Q9P2Y4	0.108883	0.0536832	0.974	1.26
PIGS	Q96S52	0.0754168	0.0911969	0.972	0.906
DMXL2	Q8TDJ6	0.0324794	0.0403704	0.971	0.909
PFKL	P17858	0.00709004	0.00812952	0.97	0.937
TRIM56	Q9BRZ2	0.40074	0.338404	0.97	1.12
METTL18	O95568	0.324893	0.312657	0.967	0.994
MPC1	Q9Y5U8	0.0162447	0.00404984	0.965	1.37
RAI14	Q9P0K7	0.0188968	0.0480841	0.964	0.731
CHAF1A	Q13111	0.0785623	0.0328132	0.963	1.28
FASTKD2	Q9NYY8	0.234119	0.367787	0.962	0.703
PTN	P21246	0.064279	0.0406143	0.962	1.12
BATF3	Q9NR55	0.101543	0.0418209	0.959	1.31
TBP	P20226	0.0476313	0.0247665	0.959	1.17
ARID1B	Q8NFD5	0.0193145	0.007336	0.958	1.24
ARL1	P40616	0.0130911	0.00838047	0.958	1.08
LEMD2	Q8NC56	0.00746644	0.00683987	0.957	0.978
USP1	O94782	0.506864	0.560598	0.957	-0.834
FAU	P62861	0.0161821	0.0289616	0.956	0.811
TINF2	Q9BSI4	0.128469	0.0195819	0.95	1.78
H4C1	P62805	0.0111036	0.00570762	0.949	1.12
DUT	P33316	0.49145	0.87662	0.947	-0.208
PRKD3	O94806	0.339957	0.207186	0.947	1.3
FIS1	Q9Y3D6	0.376756	0.319926	0.945	1.08
HSDL1	Q3SXM5	0.0104648	0.0153423	0.945	0.854
TK1	P04183	0.112847	0.064872	0.945	1.16
ALKBH4	Q9NXW9	0.268428	0.318524	0.944	0.839
SLC25A12	O75746	0.0185997	0.00987155	0.944	1.12
SMAD5	Q99717	0.0306215	0.0107932	0.944	1.26
TMEM33	P57088	0.0764954	0.123013	0.944	0.784
ZC3HAV1	Q7Z2W4	0.0653439	0.114363	0.944	0.765
ZNF292	O60281	0.00668668	0.00149441	0.944	1.35
TRMT2A	Q8IZ69	0.481465	0.532953	0.942	0.83
NOL4	O94818	0.0363518	0.00258707	0.941	1.88
TRIR	Q9BQ61	0.166132	0.18422	0.941	0.894
CAD	P27708	0.0168612	0.0288635	0.94	0.807
NFIC	P08651	0.00708335	0.00269296	0.939	1.19
TMT1A	Q9H8H3	0.00900276	0.0718673	0.939	0.51
ZEB2	O60315	0.0452885	0.0166251	0.939	1.26
TFAM	Q00059	0.00721887	0.00216237	0.938	1.25
CDS2	O95674	0.11153	0.0989362	0.937	0.983
TAOK3	Q9H2K8	0.0958852	0.104129	0.937	0.907
TNFAIP8L1	Q8WVP5	0.027415	0.0175586	0.937	1.06
MMAB	Q96EY8	0.311154	0.600807	0.936	0.463
FARS2	O95363	0.345548	0.875848	0.935	-0.147
NACC1	Q96RE7	0.0119622	0.00129232	0.934	1.6
SCCPDH	Q8NBX0	0.0135033	0.00972776	0.934	1.02
FXR2	P51116	0.0502053	0.0455768	0.933	0.962
IFT56	A0AVF1	0.103954	0.062024	0.933	1.13
TMPO.1	P42167	0.00981769	0.00732325	0.932	1
TEAD2	Q15562	0.219493	0.0703737	0.931	1.53
MRPS6	P82932	0.164977	0.0904192	0.928	1.2
FXR1	P51114	0.0125087	0.0115694	0.927	0.946
NTPCR	Q9BSD7	0.0293368	0.060487	0.926	0.737
MIOS	Q9NXC5	0.178627	0.152547	0.925	0.998
CHMP1A	Q9HD42	0.0265222	0.0124293	0.923	1.14
PLEKHG3	A1L390	0.0381038	0.0294342	0.923	0.997
MAP4	P27816	0.00832743	0.00190633	0.921	1.31
ACOT8	O14734	0.0407838	0.0102519	0.918	1.35
KIFC1	Q9BW19	0.0131378	0.00745926	0.917	1.06
PYCR2	Q96C36	0.0188805	0.0114492	0.917	1.05
PMS1	P54277	0.0140735	0.00752157	0.916	1.08
MMS19	Q96T76	0.317963	0.0947645	0.915	1.71
CDYL	Q9Y232	0.17867	0.28616	0.914	0.697
COMMD9	Q9P000	0.0719192	0.0808806	0.912	0.874
SFPQ	P23246	0.00975845	0.00840873	0.911	0.947
CCDC73	Q6ZRK6	0.181399	0.464711	0.91	-0.462
UBXN1	Q04323	0.363126	0.320729	0.91	1
RDH11	Q8TC12	0.160832	0.0927068	0.909	1.15
BAZ1B	Q9UIG0	0.00768373	0.00629996	0.906	0.952
COL6A5	A8TX70	0.476287	0.386208	0.905	1.12
PCGF6	Q9BYE7	0.179239	0.0743024	0.905	1.31
TUBB	P07437	0.0189789	0.0402125	0.905	0.726
SREBF1	P36956	0.391835	0.512941	0.904	0.679
WASF3	Q9UPY6	0.0208747	0.0146602	0.904	0.996
FANCI	Q9NVI1	0.0440009	0.0299837	0.903	1.02
KIF1C	O43896	0.0218816	0.123002	0.903	0.505
FAM162A	Q96A26	0.0959679	0.240143	0.902	0.584
KDM5B	Q9UGL1	0.115371	0.191903	0.898	0.71
RPL6	Q02878	0.0301725	0.123498	0.898	0.55
KDM6A	O15550	0.0437352	0.0519007	0.897	0.848
TCAF1	Q9Y4C2	0.0213649	0.0135458	0.897	1.02
AHCTF1	Q8WYP5	0.0199639	0.0571236	0.896	0.651
RPL35A	P18077	0.027567	0.114246	0.896	0.553
TOMM70	O94826	0.0194514	0.022574	0.896	0.86
LPCAT1	Q8NF37	0.008344	0.0177342	0.895	0.734
PEX2	P28328	0.0195674	0.00539014	0.895	1.25
MAU2	Q9Y6X3	0.0134813	0.00660844	0.894	1.07
PARN	O95453	0.490764	0.797387	0.893	-0.325
ZBED4	O75132	0.218463	0.249415	0.893	0.826
ESRRA	P11474	0.0167452	0.00631977	0.892	1.15
NIPBL	Q6KC79	0.00873817	0.00587484	0.89	0.983
PRIM1	P49642	0.07809	0.0614314	0.889	0.967
PTPN1	P18031	0.0299989	0.0539923	0.889	0.74
RPL19	P84098	0.113273	0.296857	0.889	0.538
PHTF1	Q9UMS5	0.0369865	0.0673217	0.888	0.73
RECQL5	O94762	0.176547	0.159622	0.885	0.929
BABAM2	Q9NXR7	0.0585195	0.050636	0.884	0.928
CWC22	Q9HCG8	0.0205094	0.0671323	0.883	0.612
MBIP	Q9NS73	0.310317	0.636026	0.882	-0.393
PPP2CA	P67775	0.0105444	0.0140775	0.881	0.817
SFXN3	Q9BWM7	0.01044	0.051335	0.879	0.556
NOMO1	Q15155	0.00906761	0.153142	0.878	0.352
SAFB2	Q14151	0.0487262	0.00853983	0.878	1.44
SATB2	Q9UPW6	0.0304788	0.0234255	0.878	0.948
SIX4	Q9UIU6	0.0308508	0.0227917	0.877	0.958
TUBB4B	P68371	0.60575	0.809786	0.877	-0.404
BCOR	Q6W2J9	0.113465	0.0949834	0.872	0.936
PACS1	Q6VY07	0.295186	0.41599	0.87	0.659
STK24	Q9Y6E0	0.183772	0.0815456	0.87	1.23
POLK	Q9UBT6	0.109755	0.0465024	0.869	1.18
TGIF2	Q9GZN2	0.232524	0.615495	0.869	0.341
MTFMT	Q96DP5	0.0370214	0.0145857	0.867	1.13
HNRNPL	P14866	0.0304783	0.0181967	0.866	1
PRR14	Q9BWN1	0.370619	0.289021	0.866	1.04
REV3L	O60673	0.571891	0.248468	0.865	1.87
RPS12	P25398	0.0514483	0.0359088	0.865	0.969
TCF4	P15884	0.0333762	0.0351915	0.865	0.851
ATAD2	Q6PL18	0.0105569	0.00429218	0.864	1.08
GTF2B	Q00403	0.0131593	0.00837359	0.862	0.969
ORMDL3	Q8N138	0.337226	0.842918	0.862	0.169
ATRX	P46100	0.0120492	0.00790467	0.859	0.958
MRTO4	Q9UKD2	0.0102286	0.00611905	0.859	0.978
TONSL	Q96HA7	0.21231	0.0780459	0.859	1.33
EMC7	Q9NPA0	0.0667637	0.0549963	0.858	0.916
RPL35	P42766	0.0170785	0.0272902	0.858	0.752
CDCA5	Q96FF9	0.503064	0.269978	0.857	1.48
NFIA	Q12857	0.0133745	0.00539245	0.856	1.08
MSN	P26038	0.285113	0.513314	0.855	0.501
NR2E1	Q9Y466	0.0182429	0.0218912	0.854	0.812
PTBP2	Q9UKA9	0.653043	0.94946	0.854	0.119
C1D	Q13901	0.263603	0.991772	0.851	-0.0073
JDP2	Q8WYK2	0.178992	0.039305	0.851	1.52
SLTM	Q9NWH9	0.0129731	0.00184729	0.851	1.37
TOPBP1	Q92547	0.0238272	0.0087215	0.85	1.11
MRPL28	Q13084	0.245872	0.0752145	0.849	1.46
APMAP	Q9HDC9	0.101616	0.170359	0.846	0.675
YTHDF2	Q9Y5A9	0.0498178	0.0580896	0.845	0.803
TFDP2	Q14188	0.0160945	0.00203215	0.844	1.41
VDAC2	P45880	0.0393767	0.0337978	0.844	0.884
AHNAK	Q09666	0.446744	0.833317	0.843	0.226
WDR59	Q6PJI9	0.101972	0.0454597	0.842	1.12
NDUFA6	P56556	0.0523708	0.0215521	0.84	1.1
CENPC	Q03188	0.489962	0.421491	0.839	0.987
NOLC1	Q14978	0.0327037	0.0180361	0.839	0.994
SLC25A15	Q9Y619	0.0475261	0.019133	0.836	1.1
CFL1	P23528	0.0201689	0.0253632	0.835	0.783
GCFC2	P16383	0.44408	0.291112	0.835	1.19
SAFB	Q15424	0.0166471	0.00154155	0.834	1.5
SUV39H2	Q9H5I1	0.334494	0.888714	0.834	0.115
DMRT1	Q9Y5R6	0.223908	0.0775343	0.832	1.33
MRPS33	Q9Y291	0.414509	0.433706	0.83	0.794
NOSIP	Q9Y314	0.0204008	0.0174667	0.83	0.866
RPL18	Q07020	0.0207097	0.0232275	0.83	0.804
ZNF48	Q96MX3	0.122783	0.0102476	0.83	1.82
ILVBL	A1L0T0	0.0291954	0.031953	0.828	0.806
SERPINH1	P50454	0.0208663	0.045067	0.827	0.658
UBTF	P17480	0.0117742	0.0240745	0.827	0.68
SNX2	O60749	0.496233	0.436063	0.826	0.954
NME2	P22392	0.0770142	0.260439	0.824	0.468
HIGD2A	Q9BW72	0.159231	0.0555639	0.823	1.24
TMEM43	Q9BTV4	0.0192603	0.011156	0.823	0.953
ZBTB14	O43829	0.376084	0.0542425	0.823	2.14
ZMYM4	Q5VZL5	0.094031	0.0774484	0.823	0.885
CCDC167	Q9P0B6	0.538084	0.170549	0.822	2
ILF3	Q12906	0.0374323	0.0270408	0.822	0.905
TUFM	P49411	0.0135474	0.0174925	0.822	0.767
PPP2R5E	Q16537	0.194892	0.187951	0.817	0.832
LDHB	P07195	0.035719	0.450187	0.816	-0.232
PTCD1	O75127	0.0305656	0.0281834	0.816	0.835
DLX5	P56178	0.251387	0.0123005	0.815	-2.44
POLL	Q9UGP5	0.119735	0.00499394	0.815	2.12
H2AC4	P04908	0.0525388	0.0387804	0.812	0.895
SLBP	Q14493	0.0502156	0.0668704	0.812	0.737
NDUFA13	Q9P0J0	0.0174809	0.0178787	0.811	0.806
BAALC	Q8WXS3	0.0946694	0.22079	0.81	0.548
HNRNPM	P52272	0.030098	0.0303359	0.807	0.805
DHCR7	Q9UBM7	0.142586	0.285709	0.806	0.552
ZNF3	P17036	0.184078	0.176556	0.804	0.821
VEZF1	Q14119	0.0350352	0.00731524	0.803	1.23
ARL14EP	Q8N8R7	0.132256	0.164192	0.802	0.726
PPP1R12C	Q9BZL4	0.195716	0.40832	0.802	0.483
BCORL1	Q5H9F3	0.0467397	0.00361366	0.801	1.6
ITPRIP	Q8IWB1	0.0703637	0.0577033	0.8	0.857
ORC1	Q13415	0.0626029	0.00437453	0.799	1.68
SIX5	Q8N196	0.407936	0.131914	0.799	1.6
SORT1	Q99523	0.253401	0.919757	0.799	0.0654
PJA2	O43164	0.0845028	0.0246863	0.798	1.19
CXXC1	Q9P0U4	0.0134708	0.00102168	0.795	1.48
BRD2	P25440	0.564379	0.371273	0.794	1.27
NFYA	P23511	0.138831	0.344294	0.79	0.467
DIP2A	Q14689	0.0844176	0.112107	0.789	0.706
ATF6B	Q99941	0.0755359	0.0364792	0.788	1
TANK	Q92844	0.347312	0.97006	0.785	-0.0298
MPHOSPH6	Q99547	0.330151	0.316292	0.783	0.808
TRAPPC5	Q8IUR0	0.195537	0.144435	0.782	0.907
RNF5	Q99942	0.282301	0.593099	0.779	0.368
RIOX2	Q8IUF8	0.0178461	0.0159619	0.777	0.801
ELOVL5	Q9NYP7	0.0226011	0.0196317	0.772	0.803
SFRP1	Q8N474	0.0498684	0.0296917	0.769	0.903
RPL12	P30050	0.104807	0.148608	0.768	0.661
TRNAU1AP	Q9NX07	0.031739	0.207697	0.766	0.372
ASPHD2	Q6ICH7	0.232568	0.447539	0.764	0.463
IFIT5	Q13325	0.101917	0.0659379	0.763	0.897
RPL7A	P62424	0.027803	0.0611982	0.763	0.596
SEC61A1	P61619	0.0857809	0.0661966	0.763	0.838
BZW1	Q7L1Q6	0.404328	0.446119	0.762	0.691
CABIN1	Q9Y6J0	0.071047	0.0255979	0.76	1.05
KIAA2013	Q8IYS2	0.169117	0.0287804	0.76	1.45
RPL3	P39023	0.0151116	0.0540143	0.759	0.521
LBR	Q14739	0.0417282	0.368014	0.757	0.273
PIK3C2A	O00443	0.0236945	0.0354731	0.756	0.671
BEND5	Q7L4P6	0.0194279	0.000265233	0.755	2.09
NFIB	O00712	0.0217683	0.00431973	0.755	1.15
CALU	O43852	0.0290742	0.0171923	0.754	0.875
CBX2	Q14781	0.18473	0.082721	0.754	1.07
MRPL34	Q9BQ48	0.0619508	0.107814	0.754	0.614
RPS28	P62857	0.0453654	0.0265213	0.754	0.887
ARF6	P62330	0.20621	0.641028	0.75	0.255
KPNA1	P52294	0.0629306	0.0257545	0.75	0.992
ARHGAP12	Q8IWW6	0.807023	0.570682	0.748	-1.76
TOM1L2	Q6ZVM7	0.0918697	0.0852792	0.748	0.77
PKM	P14618	0.0351675	0.0610976	0.747	0.626
USE1	Q9NZ43	0.120732	0.0601087	0.747	0.972
WDR5	P61964	0.113082	0.0726516	0.746	0.884
APC2	O95996	0.268266	0.589029	0.744	0.344
BAZ2A	Q9UIF9	0.0310806	0.0338867	0.744	0.725
TUBB3	Q13509	0.026697	0.0764524	0.744	0.531
AMBRA1	Q9C0C7	0.674051	0.473715	0.743	-1.29
NCKAP1	Q9Y2A7	0.0186085	0.0167214	0.743	0.766
DLGAP5	Q15398	0.196425	0.383234	0.742	0.475
GOT2	P00505	0.33149	0.658009	0.742	-0.324
RPLP0	P05388	0.0355147	0.108166	0.742	0.504
RAE1	P78406	0.0789708	0.0968412	0.738	0.684
MLKL	Q8NB16	0.116356	0.0853354	0.737	0.833
RAD50	Q92878	0.767153	0.708745	0.737	0.932
CTDSP1	Q9GZU7	0.0718472	0.0753303	0.733	0.721
HSD17B10	Q99714	0.0735023	0.0319638	0.733	0.961
NEIL1	Q96FI4	0.137999	0.0303791	0.732	1.25
STK4	Q13043	0.307345	0.310734	0.732	0.726
BAZ1A	Q9NRL2	0.0265945	0.00562105	0.73	1.1
VPS9D1	Q9Y2B5	0.565638	0.661733	0.728	0.55
TRPS1	Q9UHF7	0.105895	0.119011	0.727	0.693
LEMD3	Q9Y2U8	0.0865567	0.0495693	0.726	0.882
SMARCA5	O60264	0.0268297	0.0249968	0.725	0.74
CENPV	Q7Z7K6	0.0803796	0.0435847	0.723	0.89
PRKAG1	P54619	0.226797	0.0922607	0.722	1.09
PPP1R12A	O14974	0.11602	0.0306205	0.721	1.14
TMEM214	Q6NUQ4	0.0805297	0.112366	0.721	0.634
ANP32E	Q9BTT0	0.183881	0.310197	0.72	0.526
FMR1	Q06787	0.0565707	0.0397834	0.72	0.806
IPO9	Q96P70	0.0404244	0.0114807	0.72	1.03
NDUFV1	P49821	0.257718	0.110661	0.72	1.1
RPL30	P62888	0.0212978	0.0773629	0.72	0.479
NDUFB10	O96000	0.140009	0.146399	0.719	0.704
SLC25A13	Q9UJS0	0.0492932	0.0808972	0.718	0.605
U2AF2	P26368	0.113099	0.337623	0.718	0.395
PPP2R1A	P30153	0.0323684	0.0209653	0.715	0.811
BEND3	Q5T5X7	0.076948	0.0937741	0.714	0.664
DOCK4	Q8N1I0	0.483722	0.197188	0.714	1.41
LSM12	Q3MHD2	0.458533	0.146363	0.714	1.54
IWS1	Q96ST2	0.0467997	0.0686562	0.713	0.627
MARCKSL1	P49006	0.0483688	0.262147	0.713	0.344
ZNF835	Q9Y2P0	0.668369	0.377437	0.713	1.52
METAP2	P50579	0.15472	0.444188	0.712	0.351
MTCH1	Q9NZJ7	0.038328	0.0594275	0.712	0.618
TIMM17B	O60830	0.368292	0.477986	0.712	0.552
ARHGEF1	Q92888	0.414894	0.126535	0.71	1.47
EXOSC9	Q06265	0.0823582	0.0431832	0.71	0.885
FOXK1	P85037	0.0243309	0.0119298	0.709	0.862
SNRPA	P09012	0.0472861	0.0158635	0.709	0.976
TUBG1	P23258	0.0520002	0.0306274	0.709	0.836
HMGA1	P17096	0.0600664	0.0418476	0.708	0.797
PCCA	P05165	0.0339285	0.0443262	0.708	-0.652
PTCD3	Q96EY7	0.280267	0.614137	0.707	0.313
BRD8	Q9H0E9	0.216144	0.754712	0.705	-0.164
CNTFR	P26992	0.176534	0.60966	0.705	0.243
DYNC1I2	Q13409	0.533826	0.56226	0.705	-0.655
HSPB1	P04792	0.186007	0.169287	0.705	0.739
MATR3	P43243	0.0287838	0.0136382	0.704	0.867
PPP1CA	P62136	0.0728825	0.0377925	0.704	0.875
RRP8	O43159	0.159775	0.254946	0.704	0.547
CLASP1	Q7Z460	0.0340063	0.0190847	0.703	0.831
EIF3D	O15371	0.0308123	0.029979	0.703	0.708
KLF13	Q9Y2Y9	0.0283996	0.00430048	0.702	1.15
ADAMTS16	Q8TE57	0.6065	0.555227	0.7	0.805
RBMX	P38159	0.0230271	0.00629384	0.7	0.985
COPB2	P35606	0.239758	0.553383	0.699	0.332
CEP85	Q6P2H3	0.141801	0.177097	0.698	0.628
GPR180	Q86V85	0.289695	0.986776	0.696	0.0102
NF2	P35240	0.0245924	0.122665	0.696	0.403
TBK1	Q9UHD2	0.431827	0.386032	0.696	-0.774
CSRP1	P21291	0.513857	0.808132	0.695	-0.253
CREB3L2	Q70SY1	0.309263	0.0472012	0.693	1.62
HMGN2	P05204	0.171202	0.0531866	0.692	1.1
PDS5A	Q29RF7	0.0305834	0.0528264	0.692	0.584
COA6	Q5JTJ3	0.0841644	0.0876611	0.691	0.68
LRPPRC	P42704	0.0296693	0.0642403	0.691	0.541
UCHL5	Q9Y5K5	0.0256628	0.00549849	0.691	1.04
DLD	P09622	0.0333039	0.0103286	0.69	0.954
NSMCE3	Q96MG7	0.030148	0.0335866	0.69	0.668
PUSL1	Q8N0Z8	0.372568	0.207776	0.69	1.02
USF1	P22415	0.637722	0.404757	0.69	-1.25
SRSF5	Q13243	0.0377763	0.12098	0.688	0.455
TUBA1A	Q71U36	0.0826722	0.201625	0.687	0.464
TIMM50	Q3ZCQ8	0.0229553	0.0159269	0.686	0.759
VAC14	Q08AM6	0.274349	0.356574	0.685	0.566
EXOSC2	Q13868	0.040333	0.109087	0.683	0.481
RETSAT	Q6NUM9	0.259783	0.082724	0.683	1.17
NR2F6	P10588	0.0684286	0.0224877	0.682	0.966
STOM	P27105	0.108323	0.0461327	0.68	0.922
MAGT1	Q9H0U3	0.0535908	0.0634474	0.679	0.642
VCP	P55072	0.027047	0.0434571	0.679	0.588
TDRKH	Q9Y2W6	0.612891	0.551918	0.678	0.802
RASA3	Q14644	0.033346	0.0322084	0.675	0.682
MTOR	P42345	0.0915088	0.0545456	0.674	0.81
DNAJC28	Q9NX36	0.627327	0.310822	0.673	-1.47
H1-2	P16403	0.0487382	0.0398945	0.672	0.716
LRP1	Q07954	0.512172	0.216879	0.672	1.35
GTPBP10	A4D1E9	0.2143	0.159678	0.671	0.78
STAU1	O95793	0.0300246	0.0516834	0.671	0.567
ILK	Q13418	0.110168	0.0793271	0.67	0.76
MRM2	Q9UI43	0.449468	0.926	0.67	0.0796
NR2F2	P24468	0.0336175	0.00377418	0.669	1.19
CELF1	Q92879	0.198727	0.138051	0.668	0.796
ERMP1	Q7Z2K6	0.374592	0.170751	0.668	1.1
NUBP2	Q9Y5Y2	0.0916453	0.0583997	0.667	0.784
FEN1	P39748	0.0313291	0.0349484	0.666	0.644
ZBTB2	Q8N680	0.174586	0.0122784	0.665	1.63
IRF2	P14316	0.177637	0.0423358	0.662	1.15
DHX9	Q08211	0.0263679	0.0202797	0.661	0.712
KAT14	Q9H8E8	0.353837	0.871299	0.66	0.11
RFC3	P40938	0.0446874	0.00805045	0.66	1.06
DHX30	Q7L2E3	0.0590842	0.0404088	0.659	0.745
MRPL23	Q16540	0.252507	0.231681	0.658	0.693
SEC63	Q9UGP8	0.0330349	0.0281133	0.658	0.691
CANX	P27824	0.0957566	0.601874	0.655	0.177
DCAF1	Q9Y4B6	0.330188	0.847502	0.654	0.122
SKIC3	Q6PGP7	0.0576255	0.92589	0.653	0.0258
AIP	O00170	0.240419	0.0316202	0.652	1.46
H1-6	P22492	0.198995	0.146519	0.652	0.758
RPL10A	P62906	0.0267308	0.0592664	0.651	0.508
PSIP1	O75475	0.0347559	0.00883432	0.649	0.947
ELAC2	Q9BQ52	0.0397449	0.000310277	0.648	2.14
ILF2	Q12905	0.0698363	0.0395968	0.648	0.781
RDH10	Q8IZV5	0.299431	0.276892	0.647	0.682
ESYT1	Q9BSJ8	0.041739	0.0598698	0.646	0.574
KIF22	Q14807	0.0452338	0.00565635	0.645	1.14
MLF2	Q15773	0.116933	0.431496	0.645	0.29
RFC4	P35249	0.0415693	0.0119705	0.644	0.918
MRPL36	Q9P0J6	0.0280111	0.0140779	0.643	0.779
TRIM28	Q13263	0.15979	0.224953	0.643	0.538
CAMSAP1	Q5T5Y3	0.394827	0.0889276	0.642	1.46
CHD1	O14646	0.0358398	0.0204298	0.638	0.751
STAG1	Q8WVM7	0.0613105	0.00825113	0.638	1.14
PSMB6	P28072	0.21249	0.255278	0.637	0.572
TNIK	Q9UKE5	0.129004	0.366519	0.636	0.346
PIP4P1	Q86T03	0.220263	0.183718	0.635	0.7
SNRPC	P09234	0.0970301	0.00897676	0.634	1.3
PRDM10	Q9NQV6	0.217913	0.27133	0.63	0.552
WASL	O00401	0.0515043	0.0212019	0.63	0.824
FARP1	Q9Y4F1	0.0598219	0.111682	0.629	0.499
PXK	Q7Z7A4	0.124566	0.0653324	0.629	0.805
WIZ	O95785	0.060272	0.197683	0.628	0.383
DHRS13	Q6UX07	0.307847	0.264949	0.625	0.692
DIS3	Q9Y2L1	0.380566	0.655347	0.624	0.307
EPHB4	P54760	0.424813	0.192755	0.624	1.08
SLC25A4	P12235	0.188633	0.29309	0.624	0.481
PSMC1	P62191	0.0392526	0.0994268	0.623	0.451
U2AF1	Q01081	0.0722161	0.231906	0.623	0.371
POLR3K	Q9Y2Y1	0.362533	0.182502	0.622	0.963
PCCB	P05166	0.0408284	0.0124515	0.621	-0.871
LSM14A	Q8ND56	0.48145	0.463081	0.62	0.648
PARP2	Q9UGN5	0.0823657	0.122699	0.62	0.529
CLPTM1	O96005	0.0729238	0.143149	0.618	0.472
ACD	Q96AP0	0.0489374	0.0152291	0.617	0.868
ACAD11	Q709F0	0.0854581	0.149872	0.615	0.487
EIF1AY	O14602	0.537768	0.806693	0.615	-0.24
CHMP5	Q9NZZ3	0.663255	0.2982	0.613	1.54
PSMD12	O00232	0.054932	0.120744	0.613	0.458
H1-0	P07305	0.0848985	0.0365892	0.608	0.807
NFIX	Q14938	0.047434	0.0164977	0.608	0.829
LCOR	Q96JN0	0.382661	0.83707	0.604	0.137
HRNR	Q86YZ3	0.528623	0.0387856	0.603	-2.51
NUP50	Q9UKX7	0.254897	0.100844	0.602	0.944
PPARD	Q03181	0.208529	0.113364	0.602	0.802
TUBA1C	Q9BQE3	0.380826	0.471496	0.599	0.485
ACAP2	Q15057	0.283567	0.0964548	0.596	1.02
GSPT1	P15170	0.542403	0.385254	0.595	0.867
OXSR1	O95747	0.539473	0.713446	0.595	-0.351
RTN4	Q9NQC3	0.143584	0.36204	0.595	0.343
C11orf98	E9PRG8	0.099246	0.15526	0.592	0.489
ERCC1	P07992	0.0748415	0.0267092	0.592	0.824
KPNA4	O00629	0.0571918	0.0278806	0.591	0.74
MCM9	Q9NXL9	0.279784	0.22957	0.59	0.667
PAIP1	Q9H074	0.404686	0.204601	0.589	0.946
RFC2	P35250	0.0747702	0.0263164	0.589	0.823
ATP5MK	Q96IX5	0.220156	0.138869	0.586	0.737
C7orf50	Q9BRJ6	0.0763794	0.216253	0.586	0.371
EXOSC6	Q5RKV6	0.0958265	0.125195	0.586	0.525
NMT2	O60551	0.445845	0.406153	0.586	0.643
TOP1	P11387	0.0736216	0.0896057	0.586	0.545
TAF3	Q5VWG9	0.0537991	0.0351665	0.583	0.667
STX12	Q86Y82	0.416088	0.571899	0.582	0.397
TOX4	O94842	0.16806	0.0125471	0.582	1.39
VPS54	Q9P1Q0	0.218576	0.100793	0.582	0.834
COMT	P21964	0.0847414	0.125629	0.581	0.497
ABI2	Q9NYB9	0.193068	0.117424	0.579	0.73
GLRX3	O76003	0.156534	0.567542	0.579	0.212
H1-5	P16401	0.227841	0.340259	0.579	0.444
PLCB1	Q9NQ66	0.232805	0.0232465	0.579	1.39
CIC	Q96RK0	0.372354	0.328287	0.576	0.637
RO60	P10155	0.0531059	0.111899	0.575	0.438
ZFR	Q96KR1	0.113137	0.159696	0.573	0.493
WTAP	Q15007	0.366436	0.892775	0.571	-0.0814
PCOLCE	Q15113	0.185839	0.0861443	0.57	0.796
ATP2B1	P20020	0.0877782	0.053952	0.567	0.674
GSR	P00390	0.138601	0.0678203	0.567	0.751
CCT3	P49368	0.0663441	0.12523	0.566	0.444
SSR3	Q9UNL2	0.387116	0.402993	0.566	0.546
CREB1	P16220	0.505991	0.314992	0.565	0.883
ACVR2B	Q13705	0.566044	0.235525	0.563	1.24
RAB1A	P62820	0.1291	0.584739	0.563	0.18
MRPL10	Q7Z7H8	0.509092	0.121504	0.562	1.48
RANBP9	Q96S59	0.12161	0.0520604	0.561	0.768
KPRP	Q5T749	0.611255	0.0777256	0.559	2.3
ZCCHC3	Q9NUD5	0.0561656	0.0106681	0.559	0.904
[truncated: 2,660 more rows]
