# Supplementary material
Source: Research Square preprint supplement (doi:10.21203/rs.3.rs-6009404/v1)
Supplement: Supplementary file 3 [file 13a88a9c563fc7848b843c79.xlsx]

## Sheet: wt-SPR
	Response (RU)
Time (s)	Trimetrexate: 0 μM	Trimetrexate: 1.56 μM	Trimetrexate: 3.12 μM	Trimetrexate: 6.25 μM	Trimetrexate: 12.50 μM	Trimetrexate: 25 μM
-57.56	-1.83984	-2.46875	-2.44141	-2.31641	-2.31055	-2.33203
-57.46	-1.75781	-2.45703	-2.52734	-2.41406	-2.32617	-2.35156
-57.36	-1.73047	-2.39063	-2.5	-2.37891	-2.33789	-2.29297
-57.26	-1.71094	-2.3457	-2.47461	-2.31445	-2.29883	-2.25
-57.16	-1.67773	-2.32227	-2.4043	-2.29492	-2.29883	-2.25781
-57.06	-1.67773	-2.26563	-2.3418	-2.2832	-2.25781	-2.20508
-56.96	-1.67188	-2.24023	-2.29102	-2.27734	-2.2168	-2.16211
-56.86	-1.67188	-2.24609	-2.29102	-2.30664	-2.24219	-2.16602
-56.76	-1.66016	-2.23047	-2.27539	-2.28711	-2.24414	-2.16016
-56.66	-1.65625	-2.20898	-2.26953	-2.2793	-2.24609	-2.15234
-56.56	-1.64844	-2.17773	-2.25391	-2.26172	-2.2207	-2.125
-56.46	-1.64844	-2.14844	-2.2168	-2.21484	-2.17578	-2.08398
-56.36	-1.62891	-2.14063	-2.20313	-2.20313	-2.1582	-2.08008
-56.26	-1.625	-2.11523	-2.20117	-2.20313	-2.1543	-2.07227
-56.16	-1.62305	-2.11133	-2.18555	-2.19922	-2.14844	-2.05664
-56.06	-1.625	-2.09766	-2.18359	-2.18945	-2.13672	-2.04688
-55.96	-1.61914	-2.08789	-2.16992	-2.18359	-2.12109	-2.03711
-55.86	-1.61914	-2.08984	-2.16211	-2.17578	-2.12305	-2.03516
-55.76	-1.60742	-2.08594	-2.16602	-2.16992	-2.11523	-2.02344
-55.66	-1.59961	-2.08203	-2.15625	-2.15625	-2.10547	-2.00391
-55.56	-1.59961	-2.07227	-2.1543	-2.14453	-2.0957	-1.98438
-55.46	-1.58789	-2.07031	-2.14453	-2.15234	-2.08594	-1.98438
-55.36	-1.58789	-2.05273	-2.13086	-2.13477	-2.07227	-1.96875
-55.26	-1.58008	-2.03711	-2.13086	-2.11914	-2.07031	-1.94727
-55.16	-1.58008	-2.02344	-2.10938	-2.10547	-2.05859	-1.94141
-55.06	-1.56836	-2.01563	-2.10938	-2.10547	-2.05078	-1.93359
-54.96	-1.56836	-1.99219	-2.08594	-2.08203	-2.02734	-1.92188
-54.86	-1.55664	-1.98828	-2.07813	-2.0625	-2.00781	-1.90234
-54.76	-1.54883	-1.99023	-2.07813	-2.05859	-2.01563	-1.90625
-54.66	-1.54883	-1.98438	-2.0918	-2.06445	-2.00977	-1.90039
-54.56	-1.55273	-1.96875	-2.07617	-2.04883	-1.99414	-1.89258
-54.46	-1.54688	-1.95508	-2.0625	-2.03516	-1.98828	-1.875
-54.36	-1.53906	-1.93945	-2.04688	-2.01953	-1.97266	-1.86719
-54.26	-1.53906	-1.92578	-2.04102	-2.01367	-1.95898	-1.85352
-54.16	-1.53906	-1.91797	-2.0332	-2.00586	-1.95117	-1.8457
-54.06	-1.53906	-1.91602	-2.01953	-1.99219	-1.94922	-1.83984
-53.96	-1.52734	-1.89648	-2	-1.98438	-1.92969	-1.82031
-53.86	-1.52734	-1.89258	-2.00391	-1.97656	-1.92188	-1.82422
-53.76	-1.52734	-1.90039	-2.00391	-1.98438	-1.92188	-1.82422
-53.66	-1.52344	-1.88867	-2	-1.97266	-1.91797	-1.80859
-53.56	-1.50977	-1.90039	-2.00391	-1.97656	-1.92188	-1.80469
-53.46	-1.50977	-1.89844	-2.00586	-1.98242	-1.93164	-1.81445
-53.36	-1.49805	-1.88672	-2.01172	-1.96484	-1.91992	-1.80273
-53.26	-1.49805	-1.88281	-2.00781	-1.96094	-1.91602	-1.79883
-53.16	-1.49805	-1.88867	-2.00195	-1.9668	-1.91016	-1.80078
-53.06	-1.49805	-1.88086	-1.99414	-1.95898	-1.91016	-1.79297
-52.96	-1.49023	-1.89844	-2.01172	-1.97656	-1.91602	-1.81055
-52.86	-1.48633	-1.90039	-2.00977	-1.97852	-1.92383	-1.80664
-52.76	-1.5	-1.88672	-1.99023	-1.96484	-1.91016	-1.79492
-52.66	-1.48828	-1.89844	-1.98633	-1.96094	-1.90625	-1.79102
-52.56	-1.48047	-1.88672	-1.98047	-1.94336	-1.88477	-1.77734
-52.46	-1.48047	-1.86719	-1.96094	-1.93164	-1.875	-1.76563
-52.36	-1.48047	-1.85938	-1.95313	-1.92188	-1.88086	-1.76172
-52.26	-1.46875	-1.84766	-1.94141	-1.92383	-1.86914	-1.74219
-52.16	-1.46875	-1.85547	-1.94922	-1.93555	-1.86523	-1.74219
-52.06	-1.46094	-1.85938	-1.9375	-1.91992	-1.84766	-1.73828
-51.96	-1.46094	-1.86133	-1.93359	-1.91016	-1.84375	-1.73438
-51.86	-1.44922	-1.86719	-1.93945	-1.92383	-1.85352	-1.74023
-51.76	-1.44141	-1.85547	-1.93164	-1.9082	-1.83984	-1.73242
-51.66	-1.42969	-1.84375	-1.91992	-1.91406	-1.83203	-1.7207
-51.56	-1.42969	-1.85547	-1.91992	-1.91406	-1.83789	-1.7207
-51.46	-1.42969	-1.83984	-1.9082	-1.89844	-1.82617	-1.7168
-51.36	-1.42188	-1.83398	-1.91992	-1.9043	-1.82227	-1.72266
-51.26	-1.42188	-1.81641	-1.90234	-1.88672	-1.79883	-1.71289
-51.16	-1.41016	-1.81641	-1.89063	-1.875	-1.80273	-1.70898
-51.06	-1.41016	-1.80859	-1.88281	-1.875	-1.79688	-1.69727
-50.96	-1.41016	-1.79297	-1.875	-1.86328	-1.7832	-1.70117
-50.86	-1.39844	-1.7832	-1.86133	-1.86719	-1.78125	-1.69336
-50.76	-1.39844	-1.77734	-1.84961	-1.85547	-1.76953	-1.69336
-50.66	-1.39844	-1.76563	-1.83008	-1.84375	-1.75	-1.67383
-50.56	-1.39063	-1.75391	-1.81836	-1.83203	-1.74219	-1.66992
-50.46	-1.39453	-1.74609	-1.81055	-1.83594	-1.74023	-1.67383
-50.36	-1.40039	-1.73828	-1.79102	-1.81641	-1.72461	-1.66211
-50.26	-1.38867	-1.73047	-1.78711	-1.80859	-1.72266	-1.6582
-50.16	-1.38086	-1.7168	-1.7793	-1.79102	-1.69727	-1.66211
-50.06	-1.38086	-1.70508	-1.76758	-1.77734	-1.68945	-1.64648
-49.96	-1.36914	-1.67969	-1.73828	-1.75781	-1.66992	-1.61914
-49.86	-1.36914	-1.67773	-1.73047	-1.75586	-1.67188	-1.62305
-49.76	-1.36914	-1.6582	-1.71094	-1.74414	-1.66016	-1.60352
-49.66	-1.36133	-1.65039	-1.71484	-1.74805	-1.64063	-1.5918
-49.56	-1.34961	-1.66406	-1.7207	-1.75391	-1.62891	-1.5918
-49.46	-1.34961	-1.66016	-1.71289	-1.74609	-1.62891	-1.58789
-49.36	-1.35352	-1.66992	-1.71289	-1.75781	-1.63281	-1.60547
-49.26	-1.34375	-1.67578	-1.70117	-1.75195	-1.61914	-1.59375
-49.16	-1.3418	-1.67969	-1.71289	-1.77148	-1.63086	-1.60938
-49.06	-1.35156	-1.68945	-1.70313	-1.7793	-1.63672	-1.61328
-48.96	-1.35352	-1.68359	-1.69531	-1.78516	-1.62891	-1.60156
-48.86	-1.35156	-1.66797	-1.68164	-1.76563	-1.59766	-1.60156
-48.76	-1.33203	-1.66602	-1.68945	-1.7793	-1.60742	-1.62695
-48.66	-1.32031	-1.66992	-1.69336	-1.76953	-1.61133	-1.62695
-48.56	-1.30859	-1.67773	-1.71875	-1.7793	-1.63672	-1.63672
-48.46	-1.30859	-1.68945	-1.72266	-1.78906	-1.65625	-1.63867
-48.36	-1.30469	-1.6875	-1.73633	-1.78711	-1.68359	-1.64648
-48.26	-1.29297	-1.67383	-1.72852	-1.76953	-1.6875	-1.64258
-48.16	-1.28711	-1.66211	-1.71875	-1.75	-1.69531	-1.63867
-48.06	-1.29688	-1.66406	-1.71094	-1.73828	-1.69141	-1.65039
-47.96	-1.27344	-1.67578	-1.67969	-1.73242	-1.64453	-1.66992
-47.86	-1.12305	-1.64258	-1.63086	-1.69922	-1.5625	-1.63086
-47.76	-0.607422	-1.59766	-1.64648	-1.65039	-1.58984	-1.35547
-47.66	-0.566406	-1.65625	-1.71289	-1.66797	-1.6543	-1.38672
-47.56	-1.23047	-1.72461	-1.72656	-1.7832	-1.55859	-1.69531
-47.46	-1.54297	-1.68555	-1.66016	-1.80469	-1.60156	-1.58008
-47.36	-2.09277	-1.63477	-1.57227	-1.70508	-1.64258	-1.5293
-47.26	-2.33691	-1.39453	-1.45898	-1.47656	-1.41211	-1.39648
-47.16	-2.26855	-1.26953	-1.29297	-1.32617	-1.24023	-1.30859
-47.06	-2.21875	-1.28516	-1.29688	-1.31445	-1.25391	-1.36523
-46.96	-2.14844	-1.32031	-1.37695	-1.41992	-1.34961	-1.45117
-46.86	-1.95508	-1.38281	-1.46484	-1.52344	-1.41211	-1.54102
-46.76	-1.65039	-1.51172	-1.58789	-1.68945	-1.51172	-1.60938
-46.66	-1.38867	-1.68555	-1.70703	-1.83594	-1.61719	-1.69922
-46.56	-1.25391	-1.59766	-1.58789	-1.70508	-1.50391	-1.55664
-46.46	-1.25391	-1.56445	-1.51953	-1.63867	-1.50781	-1.5293
-46.36	-1.24414	-1.53711	-1.5332	-1.62109	-1.51563	-1.52539
-46.26	-1.19141	-1.52539	-1.54297	-1.60352	-1.52344	-1.51172
-46.16	-1.15625	-1.53711	-1.5625	-1.60156	-1.5293	-1.52344
-46.06	-1.16992	-1.54102	-1.55469	-1.5918	-1.51563	-1.51953
-45.96	-1.16992	-1.54297	-1.56836	-1.61523	-1.50977	-1.53125
-45.86	-1.1582	-1.54492	-1.56836	-1.61133	-1.51953	-1.52344
-45.76	-1.1582	-1.54883	-1.55859	-1.60547	-1.52734	-1.52734
-45.66	-1.15039	-1.56641	-1.55859	-1.61328	-1.54297	-1.5332
-45.56	-1.15039	-1.5625	-1.54297	-1.60938	-1.5293	-1.52148
-45.46	-1.15039	-1.5625	-1.55273	-1.60742	-1.5332	-1.5332
-45.36	-1.15039	-1.55078	-1.54688	-1.58984	-1.52734	-1.52344
-45.26	-1.14648	-1.55078	-1.54688	-1.57813	-1.51172	-1.50977
-45.16	-1.13867	-1.51758	-1.52539	-1.54883	-1.48438	-1.48633
-45.06	-1.13086	-1.50977	-1.52344	-1.53516	-1.49023	-1.47266
-44.96	-1.13086	-1.50781	-1.50781	-1.51563	-1.48633	-1.46484
-44.86	-1.13086	-1.49219	-1.52539	-1.5	-1.49609	-1.45313
-44.76	-1.13867	-1.48633	-1.51953	-1.49805	-1.48242	-1.42969
-44.66	-1.1543	-1.49609	-1.53516	-1.49219	-1.48047	-1.42188
-44.56	-1.16016	-1.49023	-1.52539	-1.46289	-1.44531	-1.39258
-44.46	-1.16406	-1.47266	-1.50391	-1.4375	-1.42773	-1.36914
-44.36	-1.16211	-1.46484	-1.48047	-1.41797	-1.39453	-1.36328
-44.26	-1.16797	-1.42773	-1.44922	-1.40039	-1.38672	-1.35352
-44.16	-1.16797	-1.4082	-1.44336	-1.40625	-1.38477	-1.36523
-44.06	-1.17188	-1.38086	-1.43555	-1.40234	-1.39844	-1.36719
-43.96	-1.17773	-1.35547	-1.41406	-1.37695	-1.37891	-1.3418
-43.86	-1.17773	-1.35547	-1.41211	-1.36914	-1.37109	-1.3418
-43.76	-1.17383	-1.35938	-1.42969	-1.38281	-1.38867	-1.3418
-43.66	-1.15625	-1.38672	-1.45508	-1.4043	-1.41016	-1.35938
-43.56	-1.14648	-1.39844	-1.45703	-1.4082	-1.40625	-1.35352
-43.46	-1.12891	-1.40039	-1.46094	-1.41797	-1.41797	-1.34961
-43.36	-1.13281	-1.39453	-1.44922	-1.39844	-1.39258	-1.32813
-43.26	-1.13867	-1.39453	-1.43359	-1.37891	-1.38086	-1.32617
-43.16	-1.13086	-1.37695	-1.41797	-1.375	-1.36914	-1.31445
-43.06	-1.11914	-1.38477	-1.41211	-1.37109	-1.38086	-1.31836
-42.96	-1.12305	-1.36133	-1.40039	-1.3457	-1.35742	-1.29297
-42.86	-1.12891	-1.35156	-1.38086	-1.3418	-1.33203	-1.27344
-42.76	-1.12891	-1.33398	-1.36523	-1.31641	-1.32031	-1.26953
-42.66	-1.11719	-1.31641	-1.37109	-1.30078	-1.3125	-1.25391
-42.56	-1.12109	-1.30469	-1.36328	-1.29492	-1.31836	-1.23828
-42.46	-1.11914	-1.29883	-1.37109	-1.28906	-1.30859	-1.24023
-42.36	-1.11914	-1.30664	-1.36719	-1.27734	-1.29102	-1.24219
-42.26	-1.09961	-1.29883	-1.35352	-1.26953	-1.29883	-1.25391
-42.16	-1.0918	-1.28711	-1.35742	-1.26563	-1.31445	-1.26953
-42.06	-1.09375	-1.29883	-1.36719	-1.2832	-1.33594	-1.29688
-41.96	-1.08984	-1.29883	-1.36523	-1.29102	-1.35547	-1.28711
-41.86	-1.07422	-1.29297	-1.36719	-1.32031	-1.36719	-1.27734
-41.76	-1.07227	-1.29883	-1.37695	-1.34961	-1.36133	-1.26563
-41.66	-1.07422	-1.28711	-1.38672	-1.36328	-1.3457	-1.24805
-41.56	-1.07227	-1.30664	-1.40234	-1.35938	-1.32422	-1.22266
-41.46	-1.06641	-1.32617	-1.39844	-1.33594	-1.28711	-1.20508
-41.36	-1.04883	-1.34766	-1.39844	-1.32031	-1.25781	-1.17578
-41.26	-1.0293	-1.34766	-1.38867	-1.30664	-1.23633	-1.15625
-41.16	-1.01758	-1.33984	-1.36328	-1.29492	-1.20117	-1.13672
-41.06	-1.00977	-1.32617	-1.3457	-1.29102	-1.18945	-1.11133
-40.96	-1.00977	-1.30664	-1.32031	-1.28516	-1.16406	-1.0918
-40.86	-1.00977	-1.29102	-1.28906	-1.25781	-1.14063	-1.07422
-40.76	-0.998047	-1.28516	-1.27734	-1.24414	-1.14063	-1.06055
-40.66	-0.998047	-1.28125	-1.26367	-1.23828	-1.10938	-1.03125
-40.56	-0.998047	-1.25195	-1.22656	-1.19727	-1.07813	-0.996094
-40.46	-0.998047	-1.20313	-1.19336	-1.16211	-1.02344	-0.945313
-40.36	-1.00586	-1.1543	-1.14258	-1.11523	-0.964844	-0.888672
-40.26	-1.0293	-1.10156	-1.08789	-1.07031	-0.923828	-0.853516
-40.16	-1.04883	-1.07227	-1.05469	-1.0293	-0.880859	-0.830078
-40.06	-1.05273	-1.03906	-1.00586	-0.990234	-0.855469	-0.822266
-39.96	-1.05469	-1.01367	-0.976563	-0.96875	-0.837891	-0.818359
-39.86	-1.0332	-1.00195	-0.962891	-0.972656	-0.833984	-0.84375
-39.76	-1	-0.978516	-0.943359	-0.982422	-0.828125	-0.845703
-39.66	-0.980469	-0.951172	-0.943359	-0.998047	-0.845703	-0.847656
-39.56	-0.960938	-0.957031	-0.958984	-1.00586	-0.875	-0.882813
-39.46	-0.949219	-0.949219	-0.958984	-0.998047	-0.880859	-0.882813
-39.36	-0.941406	-0.951172	-0.96875	-1.02539	-0.904297	-0.914063
-39.26	-0.917969	-0.960938	-0.976563	-1.02344	-0.914063	-0.931641
-39.16	-0.886719	-0.951172	-0.984375	-1.03906	-0.927734	-0.927734
-39.06	-0.849609	-0.955078	-1.01758	-1.07227	-0.962891	-0.945313
-38.96	-0.822266	-0.96875	-1.03711	-1.0957	-0.984375	-0.939453
-38.86	-0.794922	-0.988281	-1.05469	-1.10742	-0.998047	-0.941406
-38.76	-0.759766	-1.00977	-1.09766	-1.12109	-1.00977	-0.957031
-38.66	-0.701172	-1.0625	-1.1543	-1.15039	-1.05078	-0.998047
-38.56	-0.652344	-1.10938	-1.19727	-1.17773	-1.08008	-1.03711
-38.46	-0.597656	-1.13477	-1.2168	-1.18555	-1.10352	-1.0625
-38.36	-0.568359	-1.14453	-1.20508	-1.19922	-1.11133	-1.07227
-38.26	-0.541016	-1.13672	-1.21094	-1.19336	-1.11719	-1.08398
-38.16	-0.525391	-1.14063	-1.22266	-1.2168	-1.14063	-1.10938
-38.06	-0.519531	-1.13086	-1.22461	-1.21875	-1.14453	-1.10547
-37.96	-0.507813	-1.13281	-1.22656	-1.22461	-1.14258	-1.11523
-37.86	-0.5	-1.12695	-1.2168	-1.2168	-1.125	-1.09961
-37.76	-0.5	-1.12891	-1.2207	-1.21484	-1.11719	-1.0918
-37.66	-0.5	-1.12695	-1.20117	-1.20313	-1.09766	-1.08008
-37.56	-0.511719	-1.11523	-1.19336	-1.18555	-1.09375	-1.0625
-37.46	-0.517578	-1.11914	-1.19141	-1.17773	-1.08008	-1.05078
-37.36	-0.521484	-1.10938	-1.18359	-1.16992	-1.06055	-1.0293
-37.26	-0.527344	-1.10742	-1.17578	-1.15625	-1.05273	-1.01563
-37.16	-0.53125	-1.10352	-1.17383	-1.16406	-1.05078	-1.01758
-37.06	-0.511719	-1.10938	-1.18555	-1.16992	-1.05078	-1.03516
-36.96	-0.496094	-1.10352	-1.18359	-1.16797	-1.05664	-1.0293
-36.86	-0.486328	-1.08984	-1.15234	-1.13672	-1.03125	-1.01172
-36.76	-0.484375	-1.08984	-1.16797	-1.14844	-1.03516	-1.01563
-36.66	-0.494141	-1.07422	-1.16211	-1.13281	-1.02539	-1.00977
-36.56	-0.5	-1.06836	-1.14063	-1.11914	-1	-1.01563
-36.46	-0.5	-1.04883	-1.13281	-1.10742	-0.984375	-0.996094
-36.36	-0.511719	-1.02734	-1.11133	-1.10547	-0.96875	-0.984375
-36.26	-0.517578	-1.03125	-1.10352	-1.09766	-0.953125	-0.984375
-36.16	-0.513672	-1.02734	-1.11133	-1.10547	-0.949219	-0.976563
-36.06	-0.507813	-1.01563	-1.12891	-1.10938	-0.953125	-0.970703
-35.96	-0.503906	-1.01172	-1.12109	-1.10742	-0.951172	-0.962891
-35.86	-0.498047	-1.00586	-1.10938	-1.10352	-0.939453	-0.958984
-35.76	-0.498047	-1.01758	-1.10547	-1.0957	-0.935547	-0.949219
-35.66	-0.494141	-1.0332	-1.12305	-1.10742	-0.941406	-0.962891
-35.56	-0.488281	-1.03516	-1.11133	-1.0957	-0.929688	-0.947266
-35.46	-0.488281	-1.03906	-1.11914	-1.0957	-0.933594	-0.945313
-35.36	-0.488281	-1.02539	-1.09961	-1.08789	-0.927734	-0.939453
-35.26	-0.480469	-1.0293	-1.09961	-1.08398	-0.927734	-0.933594
-35.16	-0.480469	-1.02734	-1.08789	-1.06836	-0.916016	-0.929688
-35.06	-0.480469	-1.01367	-1.08789	-1.07031	-0.916016	-0.929688
-34.96	-0.480469	-0.984375	-1.06641	-1.04883	-0.898438	-0.919922
-34.86	-0.480469	-0.972656	-1.05664	-1.03125	-0.890625	-0.908203
-34.76	-0.476563	-0.947266	-1.03516	-1.0293	-0.867188	-0.890625
-34.66	-0.466797	-0.927734	-1.02148	-1.02734	-0.859375	-0.894531
-34.56	-0.449219	-0.919922	-1.00977	-1.01953	-0.851563	-0.882813
-34.46	-0.449219	-0.912109	-1.00195	-1.01953	-0.847656	-0.875
-34.36	-0.449219	-0.90625	-0.990234	-1.00781	-0.832031	-0.871094
-34.26	-0.445313	-0.890625	-0.986328	-1	-0.832031	-0.863281
-34.16	-0.433594	-0.892578	-1.00195	-1.00195	-0.822266	-0.857422
-34.06	-0.419922	-0.875	-0.990234	-0.982422	-0.810547	-0.851563
-33.96	-0.416016	-0.863281	-0.986328	-0.978516	-0.806641	-0.84375
-33.86	-0.40625	-0.861328	-0.984375	-0.988281	-0.792969	-0.835938
-33.76	-0.400391	-0.847656	-0.982422	-0.986328	-0.794922	-0.845703
-33.66	-0.384766	-0.835938	-0.970703	-0.974609	-0.789063	-0.841797
-33.56	-0.378906	-0.824219	-0.974609	-0.966797	-0.78125	-0.833984
-33.46	-0.378906	-0.818359	-0.964844	-0.955078	-0.78125	-0.833984
-33.36	-0.382813	-0.798828	-0.951172	-0.943359	-0.777344	-0.833984
-33.26	-0.388672	-0.792969	-0.949219	-0.935547	-0.769531	-0.828125
-33.16	-0.384766	-0.767578	-0.949219	-0.935547	-0.773438	-0.833984
-33.06	-0.378906	-0.755859	-0.949219	-0.927734	-0.767578	-0.822266
-32.96	-0.371094	-0.736328	-0.929688	-0.902344	-0.751953	-0.802734
-32.86	-0.371094	-0.736328	-0.925781	-0.898438	-0.757813	-0.802734
-32.76	-0.367188	-0.732422	-0.916016	-0.888672	-0.742188	-0.802734
-32.66	-0.349609	-0.726563	-0.910156	-0.882813	-0.740234	-0.789063
-32.56	-0.345703	-0.71875	-0.902344	-0.875	-0.75	-0.792969
-32.46	-0.339844	-0.712891	-0.900391	-0.873047	-0.736328	-0.787109
-32.36	-0.339844	-0.714844	-0.900391	-0.873047	-0.736328	-0.78125
-32.26	-0.339844	-0.699219	-0.884766	-0.857422	-0.712891	-0.769531
-32.16	-0.339844	-0.699219	-0.896484	-0.857422	-0.705078	-0.775391
-32.06	-0.328125	-0.708984	-0.894531	-0.863281	-0.708984	-0.769531
-31.96	-0.328125	-0.697266	-0.882813	-0.833984	-0.708984	-0.751953
-31.86	-0.324219	-0.701172	-0.875	-0.837891	-0.712891	-0.755859
-31.76	-0.318359	-0.699219	-0.876953	-0.84375	-0.707031	-0.753906
-31.66	-0.310547	-0.697266	-0.882813	-0.855469	-0.732422	-0.759766
-31.56	-0.310547	-0.697266	-0.863281	-0.847656	-0.738281	-0.751953
-31.46	-0.310547	-0.695313	-0.873047	-0.845703	-0.742188	-0.761719
-31.36	-0.310547	-0.695313	-0.861328	-0.833984	-0.738281	-0.75
-31.26	-0.294922	-0.695313	-0.853516	-0.826172	-0.730469	-0.742188
-31.16	-0.279297	-0.707031	-0.853516	-0.826172	-0.738281	-0.742188
-31.06	-0.283203	-0.710938	-0.841797	-0.814453	-0.722656	-0.730469
-30.96	-0.291016	-0.716797	-0.841797	-0.814453	-0.728516	-0.71875
-30.86	-0.275391	-0.720703	-0.845703	-0.810547	-0.724609	-0.714844
-30.76	-0.267578	-0.730469	-0.839844	-0.804688	-0.734375	-0.708984
-30.66	-0.267578	-0.732422	-0.839844	-0.804688	-0.732422	-0.708984
-30.56	-0.263672	-0.730469	-0.839844	-0.804688	-0.738281	-0.708984
-30.46	-0.259766	-0.724609	-0.828125	-0.796875	-0.742188	-0.701172
-30.36	-0.255859	-0.726563	-0.833984	-0.796875	-0.75	-0.701172
-30.26	-0.240234	-0.726563	-0.826172	-0.785156	-0.738281	-0.697266
-30.16	-0.244141	-0.742188	-0.828125	-0.785156	-0.746094	-0.708984
-30.06	-0.232422	-0.736328	-0.818359	-0.773438	-0.736328	-0.708984
-29.96	-0.240234	-0.732422	-0.810547	-0.765625	-0.736328	-0.701172
-29.86	-0.240234	-0.736328	-0.810547	-0.765625	-0.738281	-0.705078
-29.76	-0.228516	-0.736328	-0.798828	-0.753906	-0.734375	-0.701172
-29.66	-0.220703	-0.732422	-0.810547	-0.753906	-0.728516	-0.701172
-29.56	-0.220703	-0.736328	-0.802734	-0.746094	-0.724609	-0.693359
-29.46	-0.224609	-0.744141	-0.802734	-0.75	-0.724609	-0.705078
-29.36	-0.21875	-0.734375	-0.802734	-0.748047	-0.722656	-0.693359
-29.26	-0.21875	-0.746094	-0.804688	-0.753906	-0.736328	-0.691406
-29.16	-0.210938	-0.742188	-0.800781	-0.75	-0.744141	-0.691406
-29.06	-0.210938	-0.736328	-0.8125	-0.736328	-0.734375	-0.691406
-28.96	-0.199219	-0.732422	-0.8125	-0.736328	-0.736328	-0.691406
-28.86	-0.199219	-0.710938	-0.796875	-0.724609	-0.71875	-0.671875
-28.76	-0.191406	-0.720703	-0.789063	-0.724609	-0.734375	-0.667969
-28.66	-0.191406	-0.703125	-0.785156	-0.712891	-0.724609	-0.662109
-28.56	-0.1875	-0.695313	-0.777344	-0.712891	-0.71875	-0.65625
-28.46	-0.189453	-0.707031	-0.777344	-0.707031	-0.714844	-0.654297
-28.36	-0.189453	-0.707031	-0.777344	-0.707031	-0.716797	-0.660156
-28.26	-0.193359	-0.695313	-0.773438	-0.695313	-0.703125	-0.648438
-28.16	-0.191406	-0.695313	-0.767578	-0.703125	-0.707031	-0.648438
-28.06	-0.191406	-0.695313	-0.759766	-0.695313	-0.699219	-0.640625
-27.96	-0.191406	-0.695313	-0.759766	-0.695313	-0.695313	-0.640625
-27.86	-0.1875	-0.695313	-0.748047	-0.683594	-0.685547	-0.628906
-27.76	-0.181641	-0.695313	-0.748047	-0.683594	-0.697266	-0.628906
-27.66	-0.189453	-0.683594	-0.748047	-0.6875	-0.673828	-0.621094
-27.56	-0.185547	-0.677734	-0.742188	-0.683594	-0.667969	-0.621094
-27.46	-0.177734	-0.689453	-0.75	-0.681641	-0.667969	-0.621094
-27.36	-0.173828	-0.677734	-0.738281	-0.675781	-0.65625	-0.621094
-27.26	-0.179688	-0.677734	-0.738281	-0.683594	-0.65625	-0.609375
-27.16	-0.179688	-0.689453	-0.753906	-0.683594	-0.660156	-0.613281
-27.06	-0.175781	-0.689453	-0.753906	-0.677734	-0.660156	-0.617188
-26.96	-0.169922	-0.685547	-0.75	-0.689453	-0.660156	-0.625
-26.86	-0.177734	-0.662109	-0.728516	-0.673828	-0.640625	-0.621094
-26.76	-0.177734	-0.658203	-0.728516	-0.666016	-0.638672	-0.613281
-26.66	-0.177734	-0.666016	-0.712891	-0.654297	-0.626953	-0.601563
-26.56	-0.177734	-0.666016	-0.710938	-0.654297	-0.626953	-0.601563
-26.46	-0.177734	-0.673828	-0.716797	-0.662109	-0.626953	-0.601563
-26.36	-0.177734	-0.662109	-0.708984	-0.654297	-0.626953	-0.597656
-26.26	-0.173828	-0.658203	-0.720703	-0.669922	-0.630859	-0.607422
-26.16	-0.179688	-0.666016	-0.710938	-0.666016	-0.626953	-0.603516
-26.06	-0.175781	-0.658203	-0.703125	-0.658203	-0.630859	-0.603516
-25.96	-0.169922	-0.646484	-0.699219	-0.646484	-0.623047	-0.595703
-25.86	-0.173828	-0.646484	-0.699219	-0.646484	-0.628906	-0.601563
-25.76	-0.167969	-0.654297	-0.699219	-0.646484	-0.628906	-0.601563
-25.66	-0.175781	-0.646484	-0.707031	-0.646484	-0.621094	-0.605469
-25.56	-0.169922	-0.634766	-0.701172	-0.634766	-0.609375	-0.59375
-25.46	-0.177734	-0.642578	-0.693359	-0.626953	-0.601563	-0.585938
-25.36	-0.173828	-0.642578	-0.685547	-0.630859	-0.605469	-0.585938
-25.26	-0.167969	-0.632813	-0.683594	-0.621094	-0.595703	-0.580078
-25.16	-0.179688	-0.623047	-0.673828	-0.611328	-0.589844	-0.587891
-25.06	-0.175781	-0.628906	-0.683594	-0.617188	-0.601563	-0.59375
-24.96	-0.167969	-0.617188	-0.677734	-0.605469	-0.589844	-0.59375
-24.86	-0.175781	-0.625	-0.677734	-0.605469	-0.601563	-0.601563
-24.76	-0.169922	-0.617188	-0.669922	-0.609375	-0.599609	-0.59375
-24.66	-0.166016	-0.609375	-0.658203	-0.601563	-0.591797	-0.582031
-24.56	-0.167969	-0.615234	-0.673828	-0.607422	-0.607422	-0.582031
-24.46	-0.164063	-0.607422	-0.671875	-0.599609	-0.595703	-0.574219
-24.36	-0.158203	-0.599609	-0.660156	-0.595703	-0.599609	-0.574219
-24.26	-0.166016	-0.605469	-0.648438	-0.576172	-0.587891	-0.566406
-24.16	-0.160156	-0.597656	-0.640625	-0.580078	-0.580078	-0.564453
-24.06	-0.160156	-0.59375	-0.640625	-0.582031	-0.580078	-0.560547
-23.96	-0.160156	-0.576172	-0.628906	-0.564453	-0.568359	-0.542969
-23.86	-0.160156	-0.572266	-0.621094	-0.556641	-0.564453	-0.539063
-23.76	-0.167969	-0.570313	-0.617188	-0.552734	-0.5625	-0.525391
-23.66	-0.171875	-0.583984	-0.638672	-0.572266	-0.564453	-0.527344
-23.56	-0.166016	-0.574219	-0.628906	-0.5625	-0.558594	-0.517578
-23.46	-0.160156	-0.576172	-0.630859	-0.564453	-0.558594	-0.511719
-23.36	-0.160156	-0.564453	-0.623047	-0.552734	-0.550781	-0.515625
-23.26	-0.148438	-0.554688	-0.615234	-0.539063	-0.554688	-0.507813
-23.16	-0.148438	-0.574219	-0.621094	-0.541016	-0.560547	-0.521484
-23.06	-0.144531	-0.560547	-0.621094	-0.523438	-0.552734	-0.509766
-22.96	-0.150391	-0.554688	-0.609375	-0.511719	-0.546875	-0.509766
-22.86	-0.150391	-0.537109	-0.583984	-0.486328	-0.521484	-0.480469
-22.76	-0.138672	-0.537109	-0.583984	-0.501953	-0.521484	-0.482422
-22.66	-0.142578	-0.548828	-0.583984	-0.492188	-0.517578	-0.486328
-22.56	-0.148438	-0.537109	-0.580078	-0.474609	-0.507813	-0.476563
-22.46	-0.140625	-0.529297	-0.572266	-0.466797	-0.496094	-0.474609
-22.36	-0.140625	-0.521484	-0.568359	-0.447266	-0.478516	-0.458984
-22.26	-0.132813	-0.53125	-0.5625	-0.443359	-0.486328	-0.453125
-22.16	-0.138672	-0.521484	-0.539063	-0.425781	-0.460938	-0.429688
-22.06	-0.138672	-0.527344	-0.53125	-0.425781	-0.464844	-0.423828
-21.96	-0.138672	-0.515625	-0.519531	-0.417969	-0.443359	-0.423828
-21.86	-0.138672	-0.503906	-0.511719	-0.416016	-0.441406	-0.412109
-21.76	-0.134766	-0.494141	-0.507813	-0.408203	-0.429688	-0.398438
-21.66	-0.132813	-0.482422	-0.5	-0.40625	-0.419922	-0.404297
-21.56	-0.134766	-0.464844	-0.488281	-0.410156	-0.404297	-0.392578
-21.46	-0.128906	-0.453125	-0.480469	-0.408203	-0.390625	-0.384766
-21.36	-0.128906	-0.431641	-0.472656	-0.400391	-0.378906	-0.376953
-21.26	-0.132813	-0.433594	-0.478516	-0.40625	-0.375	-0.382813
-21.16	-0.138672	-0.412109	-0.458984	-0.390625	-0.361328	-0.367188
-21.06	-0.126953	-0.421875	-0.455078	-0.392578	-0.353516	-0.380859
-20.96	-0.123047	-0.400391	-0.4375	-0.378906	-0.330078	-0.363281
-20.86	-0.113281	-0.376953	-0.429688	-0.384766	-0.318359	-0.355469
-20.76	-0.107422	-0.361328	-0.417969	-0.373047	-0.296875	-0.34375
-20.66	-0.0957031	-0.363281	-0.417969	-0.376953	-0.294922	-0.355469
-20.56	-0.0898438	-0.351563	-0.410156	-0.375	-0.292969	-0.353516
-20.46	-0.0898438	-0.341797	-0.410156	-0.367188	-0.28125	-0.345703
-20.36	-0.0898438	-0.332031	-0.410156	-0.384766	-0.28125	-0.351563
-20.26	-0.0742188	-0.318359	-0.394531	-0.380859	-0.277344	-0.347656
-20.16	-0.0683594	-0.291016	-0.396484	-0.378906	-0.275391	-0.345703
-20.06	-0.0644531	-0.28125	-0.412109	-0.388672	-0.296875	-0.371094
-19.96	-0.0507813	-0.267578	-0.417969	-0.382813	-0.296875	-0.371094
-19.86	-0.0507813	-0.246094	-0.414063	-0.378906	-0.292969	-0.367188
-19.76	-0.0507813	-0.222656	-0.412109	-0.373047	-0.287109	-0.365234
-19.66	-0.046875	-0.210938	-0.410156	-0.373047	-0.279297	-0.363281
-19.56	-0.0390625	-0.205078	-0.398438	-0.361328	-0.271484	-0.351563
-19.46	-0.0273438	-0.201172	-0.398438	-0.376953	-0.277344	-0.351563
-19.36	-0.0273438	-0.199219	-0.390625	-0.375	-0.273438	-0.34375
-19.26	-0.0273438	-0.1875	-0.382813	-0.363281	-0.271484	-0.339844
-19.16	-0.0273438	-0.205078	-0.388672	-0.363281	-0.292969	-0.339844
-19.06	-0.0273438	-0.185547	-0.369141	-0.34375	-0.283203	-0.324219
-18.96	-0.0273438	-0.197266	-0.369141	-0.34375	-0.296875	-0.333984
-18.86	-0.0195313	-0.199219	-0.369141	-0.34375	-0.302734	-0.332031
-18.76	-0.0234375	-0.208984	-0.365234	-0.339844	-0.308594	-0.337891
-18.66	-0.0273438	-0.240234	-0.369141	-0.34375	-0.326172	-0.363281
-18.56	-0.00781	-0.236328	-0.353516	-0.332031	-0.322266	-0.351563
-18.46	-0.0195313	-0.251953	-0.369141	-0.339844	-0.335938	-0.359375
-18.36	-0.00781	-0.265625	-0.371094	-0.341797	-0.349609	-0.365234
-18.26	-0.00781	-0.255859	-0.359375	-0.326172	-0.339844	-0.363281
-18.16	-0.0117188	-0.283203	-0.371094	-0.345703	-0.349609	-0.373047
-18.06	-0.0195313	-0.291016	-0.367188	-0.341797	-0.353516	-0.375
-17.96	-0.0234375	-0.289063	-0.361328	-0.332031	-0.351563	-0.380859
-17.86	-0.0214844	-0.298828	-0.369141	-0.333984	-0.365234	-0.388672
-17.76	-0.0214844	-0.328125	-0.384766	-0.349609	-0.380859	-0.400391
-17.66	-0.0253906	-0.330078	-0.386719	-0.355469	-0.378906	-0.392578
-17.56	-0.03125	-0.333984	-0.396484	-0.357422	-0.373047	-0.394531
-17.46	-0.03125	-0.347656	-0.40625	-0.363281	-0.382813	-0.402344
-17.36	-0.03125	-0.345703	-0.400391	-0.351563	-0.382813	-0.390625
-17.26	-0.0351563	-0.337891	-0.400391	-0.367188	-0.376953	-0.394531
-17.16	-0.0332031	-0.324219	-0.396484	-0.365234	-0.373047	-0.388672
-17.06	-0.0429688	-0.324219	-0.390625	-0.365234	-0.378906	-0.378906
-16.96	-0.0527344	-0.332031	-0.394531	-0.365234	-0.378906	-0.373047
-16.86	-0.0625	-0.310547	-0.384766	-0.357422	-0.363281	-0.365234
-16.76	-0.0761719	-0.308594	-0.394531	-0.363281	-0.357422	-0.353516
-16.66	-0.0898438	-0.318359	-0.376953	-0.351563	-0.341797	-0.341797
-16.56	-0.09375	-0.310547	-0.367188	-0.345703	-0.326172	-0.339844
-16.46	-0.0917969	-0.283203	-0.345703	-0.34375	-0.308594	-0.318359
-16.36	-0.101563	-0.269531	-0.339844	-0.326172	-0.304688	-0.308594
-16.26	-0.111328	-0.242188	-0.330078	-0.326172	-0.279297	-0.287109
-16.16	-0.113281	-0.224609	-0.322266	-0.318359	-0.275391	-0.283203
-16.06	-0.119141	-0.21875	-0.318359	-0.318359	-0.277344	-0.279297
-15.96	-0.103516	-0.197266	-0.296875	-0.302734	-0.255859	-0.261719
-15.86	-0.113281	-0.177734	-0.298828	-0.292969	-0.242188	-0.255859
-15.76	-0.111328	-0.169922	-0.277344	-0.291016	-0.230469	-0.242188
-15.66	-0.119141	-0.162109	-0.271484	-0.285156	-0.230469	-0.244141
-15.56	-0.123047	-0.152344	-0.255859	-0.269531	-0.214844	-0.228516
-15.46	-0.128906	-0.150391	-0.25	-0.263672	-0.220703	-0.222656
-15.36	-0.128906	-0.152344	-0.25	-0.263672	-0.226563	-0.230469
-15.26	-0.128906	-0.134766	-0.242188	-0.251953	-0.207031	-0.21875
-15.16	-0.125	-0.121094	-0.230469	-0.234375	-0.197266	-0.197266
-15.06	-0.130859	-0.119141	-0.222656	-0.226563	-0.189453	-0.193359
-14.96	-0.130859	-0.138672	-0.230469	-0.226563	-0.189453	-0.193359
-14.86	-0.130859	-0.134766	-0.224609	-0.226563	-0.189453	-0.193359
-14.76	-0.119141	-0.126953	-0.212891	-0.214844	-0.181641	-0.189453
-14.66	-0.119141	-0.134766	-0.212891	-0.226563	-0.195313	-0.185547
-14.56	-0.123047	-0.150391	-0.212891	-0.226563	-0.189453	-0.195313
-14.46	-0.128906	-0.148438	-0.208984	-0.226563	-0.185547	-0.193359
-14.36	-0.121094	-0.152344	-0.214844	-0.238281	-0.195313	-0.205078
-14.26	-0.121094	-0.150391	-0.21875	-0.238281	-0.197266	-0.201172
-14.16	-0.121094	-0.130859	-0.201172	-0.214844	-0.179688	-0.183594
-14.06	-0.109375	-0.148438	-0.193359	-0.214844	-0.179688	-0.183594
-13.96	-0.109375	-0.152344	-0.197266	-0.214844	-0.179688	-0.191406
-13.86	-0.109375	-0.146484	-0.195313	-0.207031	-0.171875	-0.183594
-13.76	-0.105469	-0.140625	-0.195313	-0.207031	-0.179688	-0.183594
-13.66	-0.0917969	-0.132813	-0.183594	-0.195313	-0.167969	-0.179688
-13.56	-0.0976563	-0.126953	-0.183594	-0.195313	-0.167969	-0.177734
-13.46	-0.0976563	-0.138672	-0.195313	-0.195313	-0.167969	-0.1875
-13.36	-0.0976563	-0.134766	-0.189453	-0.183594	-0.15625	-0.169922
-13.26	-0.0976563	-0.134766	-0.181641	-0.175781	-0.148438	-0.162109
-13.16	-0.0976563	-0.138672	-0.181641	-0.1875	-0.148438	-0.162109
-13.06	-0.0976563	-0.134766	-0.169922	-0.175781	-0.136719	-0.150391
-12.96	-0.0898438	-0.134766	-0.169922	-0.175781	-0.136719	-0.162109
-12.86	-0.0859375	-0.146484	-0.185547	-0.179688	-0.140625	-0.166016
-12.76	-0.0800781	-0.146484	-0.183594	-0.177734	-0.142578	-0.164063
-12.66	-0.0800781	-0.146484	-0.171875	-0.177734	-0.148438	-0.164063
-12.56	-0.0683594	-0.142578	-0.167969	-0.162109	-0.144531	-0.148438
-12.46	-0.0683594	-0.132813	-0.138672	-0.144531	-0.130859	-0.134766
-12.36	-0.0683594	-0.123047	-0.144531	-0.142578	-0.130859	-0.130859
-12.26	-0.0605469	-0.105469	-0.136719	-0.140625	-0.126953	-0.113281
-12.16	-0.0605469	-0.105469	-0.146484	-0.126953	-0.121094	-0.113281
-12.06	-0.0605469	-0.105469	-0.132813	-0.119141	-0.113281	-0.105469
-11.96	-0.0605469	-0.101563	-0.134766	-0.121094	-0.115234	-0.115234
-11.86	-0.0488281	-0.0917969	-0.125	-0.111328	-0.113281	-0.105469
-11.76	-0.0488281	-0.0820313	-0.115234	-0.109375	-0.103516	-0.0957031
-11.66	-0.0488281	-0.0761719	-0.101563	-0.0839844	-0.0859375	-0.0820313
-11.56	-0.0488281	-0.0839844	-0.101563	-0.078125	-0.0800781	-0.09375
-11.46	-0.0410156	-0.0703125	-0.101563	-0.0664063	-0.0683594	-0.0820313
-11.36	-0.0410156	-0.0800781	-0.0898438	-0.0664063	-0.0605469	-0.0742188
-11.26	-0.0410156	-0.0800781	-0.0761719	-0.0585938	-0.0644531	-0.0664063
-11.16	-0.0292969	-0.078125	-0.078125	-0.0566406	-0.0664063	-0.0683594
-11.06	-0.0292969	-0.0585938	-0.0644531	-0.046875	-0.0605469	-0.0546875
-10.96	-0.0292969	-0.0625	-0.0566406	-0.0390625	-0.0527344	-0.046875
-10.86	-0.0292969	-0.0683594	-0.0585938	-0.0449219	-0.0585938	-0.0527344
-10.76	-0.0175781	-0.0566406	-0.0390625	-0.0332031	-0.0429688	-0.0488281
-10.66	-0.0175781	-0.0644531	-0.0390625	-0.0292969	-0.0371094	-0.0488281
-10.56	-0.0175781	-0.0527344	-0.0390625	-0.015625	-0.0410156	-0.0410156
-10.46	-0.00977	-0.046875	-0.03125	-0.015625	-0.0410156	-0.0488281
-10.36	-0.0175781	-0.046875	-0.0273438	0	-0.0292969	-0.03125
-10.26	-0.00977	-0.0390625	-0.0195313	0.00585938	-0.0175781	-0.0234375
-10.16	-0.00977	-0.0273438	-0.00781	0.0253906	-0.00781	-0.0117188
-10.06	-0.00977	-0.0273438	-0.00781	0.0175781	-0.0195313	-0.0117188
-9.96	-0.00977	-0.0195313	-0.00781	0.0253906	-0.0117188	-0.00391
-9.86	-0.00977	-0.00391	0.00976563	0.0410156	0	0
-9.76	0.00195	-0.00586	0.00977	0.046875	0	0.00586
-9.66	0.00195	-0.00586	0.0136719	0.046875	0.00391	0.00586
-9.56	0.00195313	-0.00977	0.0273438	0.0429688	0.0175781	0.0136719
-9.46	0.00195313	-0.00195	0.0351563	0.0507813	0.0214844	0.0136719
-9.36	0.0136719	-0.00391	0.0292969	0.0449219	0.0175781	0.00781
-9.26	0.0195313	0.015625	0.0371094	0.0566406	0.0117188	0.0195313
-9.16	0.0195313	0.0195313	0.0507813	0.0644531	0.0234375	0.0273438
-9.06	0.0195313	0.0234375	0.0625	0.0644531	0.0410156	0.0429688
-8.96	0.0195313	0.0273438	0.0664063	0.0722656	0.0449219	0.0527344
-8.86	0.0351563	0.0175781	0.0488281	0.0644531	0.0390625	0.046875
-8.76	0.0410156	0.0371094	0.0605469	0.0761719	0.0390625	0.0585938
-8.66	0.0410156	0.0527344	0.0683594	0.0839844	0.0507813	0.0664063
-8.56	0.0410156	0.0566406	0.0800781	0.0957031	0.0703125	0.078125
-8.46	0.0449219	0.0683594	0.0917969	0.107422	0.0820313	0.0898438
-8.36	0.0527344	0.0761719	0.103516	0.115234	0.0859375	0.0976563
-8.26	0.0527344	0.0839844	0.105469	0.123047	0.0957031	0.105469
-8.16	0.0527344	0.0859375	0.107422	0.113281	0.0917969	0.107422
-8.06	0.0527344	0.0898438	0.111328	0.113281	0.0917969	0.111328
-7.96	0.0605469	0.0957031	0.109375	0.117188	0.0957031	0.101563
-7.86	0.0605469	0.0917969	0.117188	0.130859	0.109375	0.107422
-7.76	0.0644531	0.09375	0.123047	0.125	0.111328	0.103516
-7.66	0.0703125	0.105469	0.128906	0.136719	0.123047	0.109375
-7.56	0.0703125	0.105469	0.128906	0.125	0.123047	0.117188
-7.46	0.0820313	0.113281	0.136719	0.136719	0.130859	0.125
-7.36	0.0820313	0.125	0.148438	0.150391	0.142578	0.140625
-7.26	0.0820313	0.128906	0.152344	0.148438	0.130859	0.146484
-7.16	0.0820313	0.142578	0.162109	0.166016	0.142578	0.158203
-7.06	0.0898438	0.132813	0.169922	0.173828	0.154297	0.166016
-6.96	0.0898438	0.132813	0.166016	0.162109	0.15625	0.162109
-6.86	0.0898438	0.144531	0.175781	0.167969	0.154297	0.164063
-6.76	0.101563	0.152344	0.189453	0.175781	0.162109	0.177734
-6.66	0.0976563	0.152344	0.189453	0.175781	0.162109	0.177734
-6.56	0.0957031	0.164063	0.201172	0.1875	0.166016	0.189453
-6.46	0.101563	0.164063	0.189453	0.191406	0.171875	0.189453
-6.36	0.101563	0.152344	0.185547	0.181641	0.167969	0.185547
-6.26	0.101563	0.152344	0.185547	0.181641	0.167969	0.185547
-6.16	0.101563	0.164063	0.197266	0.185547	0.179688	0.185547
-6.06	0.113281	0.164063	0.197266	0.185547	0.183594	0.185547
-5.96	0.113281	0.171875	0.205078	0.181641	0.189453	0.193359
-5.86	0.113281	0.171875	0.197266	0.181641	0.189453	0.193359
-5.76	0.121094	0.183594	0.220703	0.181641	0.201172	0.205078
-5.66	0.121094	0.183594	0.224609	0.181641	0.201172	0.216797
-5.56	0.121094	0.199219	0.224609	0.185547	0.208984	0.224609
-5.46	0.121094	0.212891	0.248047	0.193359	0.21875	0.226563
-5.36	0.121094	0.208984	0.244141	0.189453	0.214844	0.222656
-5.26	0.125	0.203125	0.238281	0.191406	0.208984	0.216797
-5.16	0.142578	0.214844	0.25	0.203125	0.220703	0.232422
-5.06	0.142578	0.199219	0.234375	0.199219	0.205078	0.21875
-4.96	0.130859	0.189453	0.228516	0.177734	0.199219	0.207031
-4.86	0.142578	0.179688	0.224609	0.167969	0.195313	0.210938
-4.76	0.146484	0.177734	0.21875	0.158203	0.189453	0.205078
-4.66	0.160156	0.183594	0.21875	0.164063	0.185547	0.205078
-4.56	0.160156	0.183594	0.21875	0.164063	0.191406	0.212891
-4.46	0.167969	0.195313	0.230469	0.167969	0.195313	0.207031
-4.36	0.181641	0.195313	0.230469	0.173828	0.201172	0.207031
-4.26	0.189453	0.203125	0.21875	0.173828	0.201172	0.214844
-4.16	0.197266	0.21875	0.222656	0.189453	0.205078	0.226563
-4.06	0.203125	0.224609	0.232422	0.199219	0.210938	0.230469
-3.96	0.210938	0.244141	0.25	0.224609	0.214844	0.236328
-3.86	0.222656	0.248047	0.238281	0.220703	0.220703	0.236328
-3.76	0.222656	0.261719	0.242188	0.21875	0.232422	0.240234
-3.66	0.220703	0.25	0.248047	0.220703	0.230469	0.242188
-3.56	0.220703	0.228516	0.238281	0.214844	0.214844	0.236328
-3.46	0.216797	0.212891	0.234375	0.207031	0.201172	0.216797
-3.36	0.214844	0.224609	0.251953	0.21875	0.216797	0.224609
-3.26	0.212891	0.216797	0.240234	0.21875	0.210938	0.210938
-3.16	0.185547	0.207031	0.226563	0.212891	0.203125	0.185547
-3.06	0.152344	0.234375	0.259766	0.25	0.242188	0.179688
-2.96	0.111328	0.279297	0.304688	0.304688	0.275391	0.175781
-2.86	0.0722656	0.339844	0.363281	0.355469	0.298828	0.203125
-2.76	0.0136719	0.376953	0.332031	0.371094	0.277344	0.216797
-2.66	-0.0429688	0.347656	0.3125	0.376953	0.28125	0.25
-2.56	-0.0996094	0.3125	0.287109	0.369141	0.277344	0.287109
-2.46	-0.148438	0.285156	0.271484	0.363281	0.267578	0.310547
-2.36	-0.207031	0.240234	0.197266	0.326172	0.236328	0.298828
-2.26	-0.316406	0.248047	0.189453	0.330078	0.226563	0.291016
-2.16	-0.392578	0.273438	0.222656	0.3125	0.232422	0.283203
-2.06	-0.4375	0.271484	0.216797	0.316406	0.257813	0.291016
-1.96	-0.488281	0.285156	0.207031	0.335938	0.265625	0.300781
-1.86	-0.511719	0.292969	0.207031	0.34375	0.287109	0.3125
-1.76	-0.570313	0.25	0.169922	0.371094	0.335938	0.330078
-1.66	-0.558594	0.28125	0.236328	0.445313	0.451172	0.410156
-1.56	-0.0878906	0.263672	0.349609	0.291016	0.423828	0.335938
-1.46	0.378906	0.236328	0.279297	0.197266	0.308594	0.271484
-1.36	0.435547	0.214844	0.164063	0.259766	0.220703	0.326172
-1.26	0.529297	0.1875	0.185547	0.3125	0.207031	0.222656
-1.16	0.580078	0.269531	0.244141	0.431641	0.291016	0.337891
-1.06	0.462891	0.328125	0.240234	0.478516	0.310547	0.388672
-0.959999	0.351563	0.376953	0.363281	0.474609	0.357422	0.460938
-0.860001	0.271484	0.419922	0.398438	0.464844	0.361328	0.455078
-0.759998	0.210938	0.421875	0.402344	0.423828	0.341797	0.445313
-0.66	0.175781	0.503906	0.496094	0.400391	0.376953	0.457031
-0.560001	0.449219	0.220703	0.222656	0.193359	0.214844	0.21875
-0.459999	-0.0976563	0.375	0.275391	0.443359	0.275391	0.589844
-0.0600014	-5.20313	8.74219	8.26367	10.8418	15.6523	29.1855
0.0400009	-5.2334	5.99023	7.64063	9.57031	15.8125	26.7441
0.139999	-4.60156	6.63672	8.27344	10.2344	16.752	27.6504
0.240002	-4.04785	6.85547	8.48047	10.8535	17.2949	28.5859
0.34	-3.62305	7.27734	9.04883	11.3613	17.5371	29.4902
0.439999	-3.31836	8.07422	9.78516	11.9648	18.3867	30.6914
0.540001	-2.95898	8.29688	9.99805	12.291	18.8867	31.3672
0.639999	-2.64648	8.51563	10.4043	12.7227	19.2402	32.1152
0.740002	-2.37793	8.89648	10.6582	13.1016	19.8652	32.5527
0.84	-2.16211	9.36523	11.1387	13.5176	20.1465	33.084
0.939999	-2.01758	9.81445	11.5273	13.8105	20.5996	33.666
1.04	-1.89844	10.0879	11.8965	14.2734	21.0078	34.2949
1.14	-1.80859	10.4805	12.2676	14.6953	21.5117	34.9434
1.24	-1.67188	10.7871	12.5918	15.0918	21.8379	35.3242
1.34	-1.5918	11.0293	12.9004	15.3301	22.1211	35.7148
1.44	-1.54492	11.2656	13.2324	15.6133	22.4277	36.2168
1.54	-1.47656	11.5059	13.6016	15.9453	22.748	36.668
1.64	-1.41406	11.752	13.8438	16.2148	23.0605	37.0176
1.74	-1.3418	12.0137	14.0898	16.4805	23.4219	37.418
1.84	-1.27734	12.2813	14.4238	16.7695	23.7676	37.8496
1.94	-1.20313	12.6035	14.7012	17.0918	24.0449	38.2422
2.04	-1.16016	12.8594	14.9531	17.373	24.3418	38.5938
2.14	-1.10938	13.0918	15.207	17.623	24.6426	38.9688
2.24	-1.07422	13.375	15.4766	17.8711	24.9238	39.3633
2.34	-1.02539	13.6563	15.7539	18.123	25.1758	39.7207
2.44	-0.980469	13.8613	16.0176	18.3906	25.5	40.0605
2.54	-0.941406	14.1055	16.3027	18.6465	25.8359	40.4395
2.64	-0.898438	14.3555	16.5801	18.9238	26.1309	40.8125
2.74	-0.859375	14.6055	16.8438	19.2031	26.416	41.1699
2.84	-0.839844	14.8359	17.1211	19.4629	26.6953	41.5254
2.94	-0.808594	15.0371	17.377	19.6992	26.9668	41.8711
3.04	-0.785156	15.2559	17.625	19.9531	27.252	42.2109
3.14	-0.740234	15.5156	17.9102	20.2324	27.582	42.5703
3.24	-0.708984	15.7344	18.1934	20.4727	27.8574	42.8926
3.34	-0.669922	15.9805	18.459	20.7402	28.127	43.2793
3.44	-0.619141	16.2246	18.7012	21	28.416	43.584
3.54	-0.587891	16.457	18.959	21.2598	28.709	43.9102
3.64	-0.560547	16.709	19.2051	21.5391	28.9961	44.2402
3.74	-0.509766	16.9336	19.457	21.7832	29.2539	44.5703
3.84	-0.478516	17.1836	19.7344	22.0449	29.541	44.9238
3.94	-0.451172	17.4199	19.9902	22.291	29.8242	45.2383
4.04	-0.419922	17.6777	20.2578	22.5332	30.1133	45.5605
4.14	-0.388672	17.9258	20.5352	22.7969	30.3828	45.9004
4.24	-0.353516	18.1602	20.8027	23.0469	30.6367	46.2305
4.34	-0.320313	18.4121	21.0508	23.3125	30.9258	46.5781
4.44	-0.269531	18.6309	21.3027	23.5703	31.207	46.9141
4.54	-0.230469	18.8672	21.5566	23.8203	31.4785	47.2656
4.64	-0.199219	19.0938	21.8105	24.0547	31.7383	47.5977
4.74	-0.160156	19.3027	22.0723	24.2813	32.0176	47.916
4.84	-0.128906	19.5176	22.3086	24.5195	32.2793	48.2246
4.94	-0.0976563	19.7129	22.541	24.7344	32.543	48.5254
5.04	-0.0703125	19.9238	22.7754	24.9668	32.7988	48.8457
5.14	-0.0507813	20.1328	23.0059	25.209	33.0684	49.1699
5.24	-0.0195313	20.3594	23.2383	25.4629	33.3223	49.502
5.34	0	20.5801	23.4746	25.7012	33.5918	49.8223
5.44	0.03125	20.7871	23.7305	25.9492	33.8613	50.1289
5.54	0.0742188	21.002	23.959	26.1875	34.127	50.416
5.64	0.107422	21.2246	24.2188	26.4395	34.3926	50.7344
5.74	0.128906	21.4492	24.4746	26.6934	34.6621	51.0332
5.84	0.152344	21.6777	24.7285	26.9375	34.9316	51.375
5.94	0.183594	21.9063	24.9766	27.1836	35.1914	51.6328
6.04	0.208984	22.125	25.2324	27.4434	35.459	51.9238
6.14	0.240234	22.3398	25.4824	27.7148	35.7207	52.5
6.24	0.259766	22.5586	25.7344	27.9727	35.998	52.9785
6.34	0.291016	22.7617	25.9766	28.2441	36.2656	53.3496
6.44	0.318359	22.9785	26.2148	28.4902	36.5234	53.5664
6.54	0.349609	23.2168	26.4648	28.7715	36.7988	53.8496
6.64	0.380859	23.4531	26.7207	29.0332	37.0645	54.1484
6.74	0.412109	23.6699	26.9414	29.3086	37.332	54.4355
6.84	0.431641	23.8848	27.1738	29.5781	37.5859	54.7188
6.94	0.451172	24.1055	27.4063	29.8789	37.8496	55.002
7.04	0.482422	24.3145	27.6504	30.1484	38.0957	55.3027
7.14	0.519531	24.5273	27.8789	30.4082	38.334	55.5781
7.24	0.550781	24.748	28.1133	30.5977	38.5898	55.8965
7.34	0.570313	24.959	28.3379	30.7168	38.8281	56.1719
7.44	0.601563	25.1895	28.5645	30.9102	39.0957	56.4512
7.54	0.621094	25.4063	28.7969	31.0996	39.3398	56.7246
7.64	0.648438	25.6055	29.0293	31.2832	39.5918	57.0254
7.74	0.679688	25.7891	29.2598	31.4551	39.8242	57.2949
7.84	0.710938	25.9922	29.4824	31.7051	40.0527	57.5664
7.94	0.730469	26.1953	29.7188	31.9219	40.3008	57.8477
8.04	0.75	26.3848	29.9336	32.1406	40.5391	58.1191
8.14	0.769531	26.582	30.1543	32.3574	40.7637	58.4043
8.24	0.800781	26.7695	30.3887	32.5762	41.0176	58.6699
8.34	0.820313	26.9805	30.6094	32.7871	41.2754	58.9551
8.44	0.839844	27.1934	30.8379	33.0195	41.5117	59.2598
8.54	0.871094	27.377	31.0625	33.2324	41.7402	59.5449
8.64	0.890625	27.5645	31.2695	33.4375	41.9727	59.8145
8.74	0.921875	27.7754	31.4922	33.6348	42.1895	60.0898
8.84	0.949219	27.959	31.7051	33.8496	42.4141	60.3594
8.94	0.96875	28.1582	31.9355	34.0801	42.6621	60.6523
9.04	1.00391	28.3516	32.1484	34.3027	42.8906	60.9375
9.14	1.03906	28.5352	32.373	34.5273	43.1367	61.2324
9.24	1.05469	28.7207	32.5938	34.7559	43.3418	61.4512
9.34	1.08203	28.9121	32.8008	34.9902	43.582	61.6758
9.44	1.09766	29.1074	33.0313	35.209	43.8184	61.918
9.54	1.10938	29.2734	33.2578	35.4199	44.0508	62.1523
9.64	1.14063	29.4512	33.4629	35.6543	44.293	62.3867
9.74	1.17188	29.6387	33.668	35.877	44.5059	62.6387
9.84	1.19922	29.8301	33.8789	36.1133	44.748	62.9141
9.94	1.21875	30.0176	34.0957	36.3242	44.9648	63.1426
10.04	1.23828	30.1797	34.3086	36.5313	45.1855	63.373
10.14	1.26953	30.5059	34.5313	36.7598	45.4121	63.6563
10.24	1.28906	30.7852	34.7383	36.9863	45.6309	63.9316
10.34	1.30859	31.0684	34.9316	37.1816	45.8672	64.1836
10.44	1.32813	31.2988	35.1309	37.3789	46.084	64.4277
10.54	1.35156	31.4902	35.3613	37.6055	46.3086	64.6816
10.64	1.37891	31.6836	35.5527	37.8145	46.5273	64.9238
10.74	1.39844	31.8945	35.75	38.0195	46.7539	65.168
10.84	1.42188	32.1191	35.9531	38.2109	46.9629	65.377
10.94	1.44922	32.3066	36.1328	38.3867	47.1484	65.6074
11.04	1.46094	32.4961	36.3418	38.582	47.3828	65.8555
11.14	1.48828	32.7129	36.5371	38.7734	47.5957	66.1035
11.24	1.51172	32.9238	36.7402	38.9844	47.8105	66.3438
11.34	1.53125	33.0488	36.9414	39.1641	48.0176	66.5762
11.44	1.55078	33.2031	37.1465	39.3535	48.2031	66.8145
11.54	1.57031	33.373	37.3379	39.5371	48.3984	67.0449
11.64	1.58984	33.5449	37.543	39.7363	48.6191	67.3047
11.74	1.60938	33.7051	37.7539	39.9316	48.8262	67.5566
11.84	1.63281	33.8438	37.9473	40.1152	48.998	67.791
11.94	1.65625	33.9766	38.1504	40.3105	49.2207	68.0273
12.04	1.67969	34.1504	38.3711	40.5117	49.4336	68.2402
12.14	1.70313	34.3457	38.5781	40.7031	49.6289	68.4707
12.24	1.73047	34.5332	38.7578	40.8848	49.8594	68.6973
12.34	1.75	34.7246	38.9492	41.0762	50.0586	68.9238
12.44	1.78125	34.8867	39.1484	41.2617	50.2598	69.1777
12.54	1.80078	35.0586	39.3516	41.4629	50.4844	69.4043
12.64	1.82031	35.2344	39.5469	41.6641	50.7129	69.6289
12.74	1.84375	35.4121	39.7324	41.8633	50.8965	69.8379
12.84	1.87305	35.5957	39.9238	42.0664	51.1035	70.0547
12.94	1.89258	35.793	40.1309	42.248	51.2988	70.2695
13.04	1.9082	36.0098	40.3125	42.4414	51.5	70.5137
13.14	1.91016	36.1641	40.4609	42.6133	51.6816	70.7168
13.24	1.9375	36.3066	40.6348	42.8125	51.8438	70.9277
13.34	1.95117	36.4395	40.8223	42.9766	52.0098	71.1211
13.44	1.9707	36.5879	40.9902	43.168	52.2051	71.3379
13.54	1.99023	36.7559	41.1836	43.332	52.4004	71.5332
13.64	2.00977	36.9063	41.3359	43.5059	52.5684	71.7383
13.74	2.0332	37.0586	41.5156	43.6836	52.7324	71.9414
13.84	2.05273	37.2246	41.6992	43.8359	52.9219	72.1406
13.94	2.06445	37.3633	41.8496	44	53.084	72.3242
14.04	2.08984	37.5098	42.0215	44.1758	53.2539	72.5234
14.14	2.10938	37.6465	42.2051	44.3652	53.4336	72.707
14.24	2.13672	37.8125	42.377	44.5273	53.6172	72.8887
14.34	2.16211	37.9941	42.5488	44.6836	53.8027	73.0918
14.44	2.18164	38.166	42.7246	44.8555	53.9844	73.2754
14.54	2.20117	38.3301	42.9004	45.0195	54.1484	73.5898
14.64	2.23242	38.5137	43.0625	45.1895	54.334	73.8984
14.74	2.25195	38.7012	43.2539	45.3672	54.5313	74.1738
14.84	2.27148	38.8887	43.4414	45.5352	54.7129	74.3164
14.94	2.30664	39.0469	43.5898	45.7129	54.8848	74.5137
15.04	2.33203	39.1953	43.7793	45.8828	55.043	74.666
15.14	2.35156	39.3672	43.9336	46.043	55.2148	74.8359
15.24	2.37109	39.5254	44.0918	46.1934	55.377	75.0234
15.34	2.39063	39.6699	44.2422	46.3535	55.5605	75.2012
15.44	2.40234	39.7988	44.3984	46.5117	55.7344	75.3574
15.54	2.40625	39.9395	44.5645	46.6875	55.8867	75.5156
15.64	2.43164	40.0801	44.7129	46.8262	56.0469	75.6719
15.74	2.44336	40.2285	44.875	47.0078	56.1973	75.8027
15.84	2.47266	40.377	45.0313	47.1875	56.3496	75.9805
15.94	2.5	40.4961	45.168	47.3574	56.5156	76.1309
16.04	2.51172	40.6484	45.3262	47.5078	56.6758	76.2988
16.14	2.53516	40.7988	45.4844	47.6836	56.8477	76.4707
16.24	2.56055	40.9531	45.6504	47.8379	57.0059	76.6348
16.34	2.57227	41.0625	45.8105	47.9863	57.1504	76.8086
16.44	2.59961	41.2363	45.9707	48.1426	57.2969	76.9863
16.54	2.61914	41.3965	46.1387	48.293	57.4531	77.1699
16.64	2.63867	41.5859	46.2832	48.4316	57.6309	77.3555
16.74	2.6582	41.7695	46.4434	48.5781	57.7988	77.5469
16.84	2.66797	41.9336	46.5801	48.707	57.9531	77.7266
16.94	2.68164	42.127	46.7266	48.8887	58.1055	77.9023
17.04	2.70117	42.3281	46.918	49.0547	58.2832	78.084
17.14	2.73633	42.4863	47.0684	49.209	58.4141	78.25
17.24	2.76563	42.6582	47.1992	49.332	58.5684	78.4141
17.34	2.79102	42.7969	47.3379	49.4902	58.7344	78.5996
17.44	2.81836	42.9297	47.4902	49.6348	58.8965	78.7402
17.54	2.84766	43.043	47.6172	49.7832	59.0508	78.875
17.64	2.86719	43.1582	47.7305	49.9336	59.1953	79.0137
17.74	2.88086	43.2637	47.875	50.0703	59.3242	79.1621
17.84	2.9082	43.3926	48.0176	50.2363	59.4727	79.3203
17.94	2.9375	43.5137	48.1777	50.3633	59.6133	79.4648
18.04	2.95117	43.6445	48.3086	50.4746	59.7637	79.6152
18.14	2.98633	43.7793	48.4414	50.6035	59.9121	79.7676
18.24	3.01172	43.918	48.5957	50.7383	60.0742	79.9316
18.34	3.03516	44.0293	48.7305	50.8691	60.209	80.084
18.44	3.05664	44.1855	48.8613	51.0059	60.3418	80.2402
18.54	3.07813	44.3223	48.9922	51.1328	60.4551	80.3574
18.64	3.10352	44.4316	49.1426	51.2539	60.5996	80.5293
18.74	3.13867	44.5918	49.3066	51.4063	60.748	80.6836
18.84	3.15625	44.7539	49.4453	51.5566	60.8828	80.832
18.94	3.19141	44.8672	49.5859	51.6973	61	80.959
19.04	3.21484	44.9785	49.7148	51.8281	61.127	81.0996
19.14	3.24414	45.1094	49.8594	51.9746	61.3027	81.25
19.24	3.25195	45.2012	49.9785	52.1113	61.4297	81.3945
19.34	3.2793	45.3184	50.0977	52.2363	61.5625	81.5156
19.44	3.29883	45.4531	50.2422	52.3828	61.7266	81.6504
19.54	3.3125	45.543	50.3594	52.5332	61.8867	81.793
19.64	3.31641	45.6445	50.4766	52.6738	62.0117	81.9355
19.74	3.32227	45.752	50.6074	52.7949	62.1191	82.0488
19.84	3.33789	45.8574	50.7266	52.9121	62.2598	82.2031
19.94	3.33984	45.957	50.8613	53.0195	62.4141	82.334
20.04	3.35938	46.0898	50.9844	53.1543	62.5742	82.4648
20.14	3.36133	46.2148	51.1016	53.2676	62.7266	82.5918
20.24	3.35742	46.3418	51.2285	53.3945	62.8457	82.7305
20.34	3.36914	46.4648	51.3574	53.5156	62.9902	82.8418
20.44	3.38086	46.5996	51.4902	53.6465	63.1152	82.9844
20.54	3.40039	46.7246	51.5996	53.7617	63.2324	83.1074
20.64	3.4082	46.8477	51.748	53.873	63.334	83.2266
20.74	3.43164	46.959	51.877	53.9766	63.4766	83.377
20.84	3.43945	47.0703	52.0039	54.0977	63.5996	83.4707
20.94	3.45508	47.1738	52.1426	54.2305	63.7246	83.6055
21.04	3.47461	47.2734	52.2285	54.3594	63.8535	83.7266
21.14	3.49219	47.3906	52.3496	54.4629	63.9668	83.8242
21.24	3.5	47.5195	52.4785	54.5938	64.0723	83.959
21.34	3.51563	47.6172	52.5938	54.7109	64.1895	84.0625
21.44	3.5332	47.7285	52.709	54.8418	64.2891	84.2148
21.54	3.54102	47.8398	52.8027	54.9473	64.3984	84.3281
21.64	3.56055	47.9492	52.9082	55.082	64.5352	84.4453
21.74	3.57227	48.0352	53.0176	55.2012	64.6719	84.5781
21.84	3.5957	48.168	53.1387	55.3223	64.8086	84.7129
21.94	3.60938	48.291	53.248	55.4395	64.9141	84.8379
22.04	3.62109	48.4238	53.3398	55.5469	65.0078	84.9512
22.14	3.64063	48.5645	53.459	55.6465	65.123	85.0703
22.24	3.65234	48.6895	53.5723	55.7461	65.2148	85.1992
22.34	3.66016	48.793	53.6953	55.8398	65.3086	85.2969
22.44	3.67578	48.9043	53.7754	55.9551	65.4141	85.4395
22.54	3.68945	49.0293	53.8809	56.0566	65.5215	85.5508
22.64	3.70117	49.1465	53.9902	56.1504	65.6191	85.668
22.74	3.70117	49.2676	54.1074	56.2676	65.7207	85.8066
22.84	3.72461	49.3789	54.2227	56.375	65.8145	85.9043
22.94	3.74219	49.4941	54.3262	56.4844	65.9023	86.0078
23.04	3.75	49.5781	54.4336	56.5977	66.0117	86.1152
23.14	3.76563	49.6816	54.5449	56.709	66.1113	86.2383
23.24	3.79102	49.7813	54.6602	56.8438	66.2461	86.3789
23.34	3.81055	49.8711	54.7461	56.9727	66.3613	86.4961
23.44	3.82617	49.9785	54.8594	57.0742	66.4766	86.5996
23.54	3.83984	50.084	54.9785	57.1973	66.5801	86.7109
23.64	3.86328	50.1953	55.084	57.3008	66.6816	86.8262
23.74	3.87109	50.2949	55.1992	57.4082	66.793	86.9375
23.84	3.88281	50.4023	55.3242	57.5078	66.9141	87.0293
23.94	3.90234	50.4902	55.4199	57.6172	67.0156	87.1387
24.04	3.91406	50.6016	55.5195	57.7207	67.125	87.248
24.14	3.93164	50.707	55.6309	57.8027	67.248	87.3555
24.24	3.94336	50.8125	55.7461	57.9102	67.3594	87.4609
24.34	3.95117	50.9375	55.8633	58.0098	67.459	87.5645
24.44	3.9668	51.0293	55.9473	58.127	67.5332	87.6582
24.54	3.98047	51.1348	56.043	58.2266	67.625	87.7754
24.64	3.99609	51.2383	56.1367	58.3164	67.7344	87.8906
24.74	4.00977	51.332	56.2148	58.4238	67.834	87.9648
24.84	4.02148	51.4219	56.3008	58.5039	67.9316	88.0781
24.94	4.04102	51.5332	56.3906	58.6113	68.0273	88.1738
25.04	4.05664	51.627	56.4805	58.7207	68.1289	88.2598
25.14	4.07031	51.7168	56.5742	58.7988	68.2168	88.3457
25.24	4.08594	51.8047	56.6797	58.9141	68.3301	88.4473
25.34	4.09961	51.8887	56.7715	58.9941	68.416	88.5234
25.44	4.11133	51.9883	56.8691	59.1016	68.5234	88.6191
25.54	4.12305	52.084	56.9727	59.1914	68.6348	88.707
25.64	4.14063	52.1621	57.0566	59.2656	68.7109	88.7988
25.74	4.15234	52.2539	57.166	59.3457	68.8066	88.8867
25.84	4.14453	52.3496	57.2539	59.4336	68.8867	88.9922
25.94	4.13867	52.4297	57.3242	59.5391	68.9805	89.1016
26.04	4.14648	52.5098	57.4004	59.6172	69.0605	89.1855
26.14	4.14453	52.6113	57.5156	59.707	69.1523	89.2832
26.24	4.15039	52.6836	57.6113	59.7793	69.2266	89.377
26.34	4.15039	52.7754	57.7012	59.8789	69.3086	89.4922
26.44	4.1543	52.8633	57.7793	59.9473	69.3984	89.5957
26.54	4.16406	52.957	57.8789	60.0391	69.4961	89.6973
26.64	4.16406	53.041	57.9531	60.1309	69.5801	89.791
26.74	4.16992	53.1367	58.0508	60.2227	69.6719	89.8926
26.84	4.18555	53.2129	58.1309	60.2949	69.75	90.0059
26.94	4.1875	53.3125	58.209	60.3691	69.8379	90.0957
27.04	4.20313	53.3945	58.291	60.459	69.9102	90.1836
27.14	4.21289	53.4863	58.3809	60.5488	70.0059	90.2676
27.24	4.21484	53.5859	58.4785	60.6504	70.0977	90.3418
27.34	4.22461	53.6465	58.5508	60.7109	70.1758	90.4082
27.44	4.23633	53.7207	58.627	60.7871	70.2578	90.4883
27.54	4.24219	53.7891	58.7012	60.8613	70.332	90.5605
27.64	4.23438	53.8672	58.7949	60.9473	70.4277	90.6309
27.74	4.24414	53.9707	58.8809	61.0273	70.5137	90.707
27.84	4.24609	54.0293	58.9531	61.1074	70.5879	90.7676
27.94	4.25195	54.1152	59.0508	61.2031	70.6738	90.8457
28.04	4.25586	54.2031	59.1328	61.291	70.7656	90.9316
28.14	4.26563	54.2871	59.2129	61.3711	70.8516	91.0098
28.24	4.26367	54.377	59.3203	61.459	70.9473	91.1094
28.34	4.26953	54.4668	59.3945	61.5488	71.0273	91.1934
28.44	4.27344	54.5371	59.457	61.6152	71.1016	91.2734
28.54	4.28516	54.6035	59.5488	61.709	71.1816	91.3711
28.64	4.29102	54.6816	59.627	61.7734	71.248	91.4258
28.74	4.28711	54.7441	59.6816	61.8418	71.3164	91.5078
28.84	4.29688	54.8242	59.7598	61.9316	71.4004	91.5723
28.94	4.29492	54.8848	59.8066	61.9941	71.4531	91.5938
29.04	4.30469	54.9609	59.8652	62.0684	71.5195	91.6523
29.14	4.31055	55.0508	59.9609	62.1563	71.5996	91.7363
29.24	4.31445	55.1133	60.043	62.2148	71.6582	91.7891
29.34	4.32031	55.1777	60.1035	62.2773	71.7227	91.8633
29.44	4.32031	55.2637	60.1777	62.3496	71.793	91.9297
29.54	4.3125	55.3398	60.2578	62.4355	71.8691	91.998
29.64	4.33008	55.416	60.3438	62.5078	71.9336	92.0586
29.74	4.33008	55.4824	60.4023	62.5664	71.9941	92.1074
29.84	4.33398	55.5645	60.5059	62.6699	72.0762	92.1836
29.94	4.33984	55.6309	60.5762	62.7363	72.1582	92.248
30.04	4.33984	55.7246	60.6582	62.8125	72.2344	92.3164
30.14	4.33984	55.7773	60.7168	62.8633	72.291	92.377
30.24	4.34375	55.8457	60.7969	62.9434	72.3535	92.4414
30.34	4.36328	55.9063	60.8633	63.0117	72.4141	92.498
30.44	4.37109	55.9707	60.9512	63.084	72.4727	92.5664
30.54	4.38281	56.0469	61.0039	63.1484	72.5273	92.623
30.64	4.39063	56.1387	61.0742	63.2324	72.6074	92.7051
30.74	4.40234	56.1973	61.1484	63.293	72.6621	92.752
30.84	4.40234	56.2578	61.2129	63.3398	72.7148	92.8105
30.94	4.42188	56.3086	61.2617	63.3945	72.7676	92.8613
31.04	4.43359	56.377	61.3086	63.4629	72.8301	92.9199
31.14	4.44141	56.4414	61.3691	63.5273	72.8984	92.9844
31.24	4.45313	56.5156	61.4238	63.6055	72.9707	93.0488
31.34	4.46484	56.5977	61.4844	63.6816	73.0391	93.1035
31.44	4.48242	56.6816	61.5508	63.752	73.1035	93.1621
31.54	4.48633	56.7305	61.6191	63.8125	73.1719	93.2168
31.64	4.49219	56.8105	61.6875	63.8848	73.2422	93.2773
31.74	4.5	56.8789	61.7344	63.9453	73.3086	93.3438
31.84	4.51172	56.9492	61.7891	64.0195	73.3711	93.3965
31.94	4.52344	56.9941	61.8594	64.1016	73.4453	93.4609
32.04	4.53125	57.0508	61.9277	64.1563	73.5039	93.5273
32.14	4.54297	57.123	62.0059	64.2344	73.5605	93.5859
32.24	4.55078	57.1836	62.0762	64.3066	73.6348	93.6777
32.34	4.5625	57.2383	62.1426	64.3652	73.7012	93.7422
32.44	4.57031	57.293	62.1895	64.4199	73.7539	93.791
32.54	4.58203	57.3574	62.248	64.4805	73.8223	93.8457
32.64	4.58984	57.4063	62.3047	64.5391	73.877	93.8984
32.74	4.58984	57.4805	62.3672	64.6172	73.9473	93.9785
32.84	4.60156	57.543	62.4297	64.6914	74.0137	94.0293
32.94	4.62109	57.6016	62.4941	64.7559	74.0801	94.1016
33.04	4.62109	57.6523	62.5449	64.8066	74.1387	94.1504
33.14	4.64063	57.7188	62.6133	64.877	74.2227	94.2148
33.24	4.64063	57.7871	62.6797	64.9551	74.291	94.2637
33.34	4.65234	57.8418	62.7383	65.0195	74.3555	94.3203
33.44	4.66016	57.9004	62.7891	65.0684	74.4121	94.377
33.54	4.67188	57.9727	62.8535	65.1348	74.4824	94.4414
33.64	4.67188	58.0176	62.9199	65.1836	74.5293	94.4863
33.74	4.68359	58.0801	62.9668	65.25	74.5938	94.5469
33.84	4.69141	58.1289	63.0313	65.3164	74.6523	94.6035
33.94	4.70313	58.1875	63.0742	65.3711	74.7012	94.6484
34.04	4.71094	58.2461	63.1211	65.4219	74.7676	94.707
34.14	4.71094	58.2813	63.1641	65.4746	74.8242	94.7617
34.24	4.71094	58.3359	63.2246	65.5313	74.8789	94.8125
34.34	4.72266	58.3906	63.2871	65.5781	74.9531	94.873
34.44	4.72656	58.4453	63.332	65.6309	75.0098	94.9336
34.54	4.74023	58.4941	63.3906	65.6973	75.0742	94.9941
34.64	4.74023	58.5449	63.4336	65.75	75.1191	95.0527
34.74	4.75195	58.5918	63.4883	65.8027	75.168	95.1094
34.84	4.75195	58.6621	63.5527	65.8691	75.2363	95.1699
34.94	4.76367	58.7051	63.6133	65.918	75.3047	95.2266
35.04	4.76953	58.7637	63.6641	65.9746	75.3633	95.2852
35.14	4.78125	58.8242	63.7324	66.0176	75.4336	95.3516
35.24	4.78125	58.8945	63.791	66.0723	75.4961	95.4121
35.34	4.78125	58.9707	63.8555	66.1426	75.5664	95.4883
35.44	4.79297	59.0234	63.9004	66.1973	75.6113	95.5391
35.54	4.80469	59.0625	63.9473	66.2559	75.6777	95.5879
35.64	4.82227	59.1348	64.0098	66.3164	75.7363	95.6523
35.74	4.83008	59.1895	64.0508	66.3711	75.791	95.7129
35.84	4.83008	59.2266	64.0938	66.4063	75.8223	95.7598
35.94	4.83398	59.2891	64.1543	66.4727	75.8828	95.8203
36.04	4.85156	59.3438	64.2031	66.5195	75.9414	95.8633
36.14	4.85156	59.3984	64.2617	66.5879	76.0059	95.9336
36.24	4.85938	59.4453	64.3027	66.6367	76.0469	95.9785
36.34	4.85938	59.4902	64.3438	66.6699	76.084	96.0332
36.44	4.87109	59.5332	64.3887	66.7148	76.1289	96.0781
36.54	4.87109	59.5762	64.4395	66.7598	76.1758	96.1133
36.64	4.87109	59.6289	64.4844	66.8125	76.2227	96.1758
36.74	4.88281	59.6934	64.5352	66.8633	76.2695	96.2227
36.84	4.90039	59.7441	64.5781	66.9043	76.3301	96.2344
36.94	4.90039	59.7793	64.6152	66.9434	76.3711	96.2715
37.04	4.91211	59.8301	64.6719	67	76.416	96.3027
37.14	4.92383	59.8887	64.709	67.0488	76.4453	96.3398
37.24	4.92969	59.9336	64.7461	67.0918	76.4824	96.373
37.34	4.92969	59.9707	64.7988	67.1348	76.5117	96.3945
37.44	4.94922	60.0234	64.8418	67.1855	76.5488	96.4238
37.54	4.94922	60.0742	64.8926	67.2383	76.5879	96.4648
37.64	4.96094	60.1016	64.9219	67.2695	76.6289	96.4922
37.74	4.96094	60.1602	64.9668	67.3203	76.6855	96.5371
37.84	4.96875	60.2031	65.002	67.3574	76.7168	96.5703
37.94	4.98438	60.25	65.0352	67.3965	76.7598	96.6055
38.04	5.00195	60.293	65.0918	67.4434	76.8027	96.6563
38.14	5.00977	60.3281	65.1367	67.4766	76.8535	96.7129
38.24	5.02148	60.3848	65.1816	67.5449	76.9102	96.7578
38.34	5.0332	60.4199	65.207	67.5742	76.9355	96.7813
38.44	5.04102	60.4512	65.2363	67.6152	76.9688	96.8027
38.54	5.05273	60.4922	65.2695	67.6719	77.0039	96.8438
38.64	5.05273	60.541	65.3105	67.7168	77.0391	96.8848
38.74	5.06055	60.5879	65.3555	67.7578	77.0781	96.9277
38.84	5.06055	60.6406	65.4121	67.8105	77.1348	96.9883
38.94	5.07617	60.6777	65.4531	67.8516	77.1816	97.0254
39.04	5.08984	60.7148	65.4805	67.8887	77.1973	97.0508
39.14	5.09766	60.7617	65.5313	67.9238	77.2402	97.0879
39.24	5.10352	60.8047	65.5801	67.9668	77.291	97.1348
39.34	5.11523	60.8516	65.6367	68.0117	77.3203	97.1777
39.44	5.12109	60.8926	65.6836	68.0547	77.3535	97.2031
39.54	5.13281	60.9414	65.7344	68.0996	77.3906	97.2363
39.64	5.15234	60.9863	65.7813	68.1582	77.4531	97.2813
39.74	5.16016	61.0566	65.8281	68.2168	77.498	97.3184
39.84	5.17188	61.082	65.8711	68.2617	77.5449	97.3457
39.94	5.17969	61.1426	65.918	68.3223	77.5977	97.3848
40.04	5.19141	61.2031	65.9824	68.375	77.6484	97.4297
40.14	5.20313	61.2324	66.0117	68.4199	77.6816	97.4395
40.24	5.22656	61.2793	66.0586	68.4609	77.7324	97.4844
40.34	5.24023	61.3301	66.1133	68.5254	77.7852	97.5332
40.44	5.25195	61.3809	66.1582	68.5742	77.834	97.5879
40.54	5.25977	61.4199	66.1914	68.6113	77.8613	97.6211
40.64	5.27148	61.4707	66.2305	68.666	77.9043	97.6699
40.74	5.2832	61.5176	66.2813	68.6992	77.9375	97.6992
40.84	5.29492	61.5664	66.334	68.7598	77.9824	97.7402
40.94	5.3125	61.6094	66.3789	68.8027	78.0371	97.7832
41.04	5.33203	61.6387	66.416	68.834	78.0723	97.8086
41.14	5.33203	61.7051	66.4785	68.8789	78.1152	97.8672
41.24	5.34375	61.7715	66.5391	68.9316	78.1719	97.9043
41.34	5.36133	61.8066	66.5703	68.9688	78.1953	97.9336
41.44	5.36914	61.8477	66.623	69.0137	78.2422	97.9688
41.54	5.38086	61.9004	66.6582	69.0527	78.2871	98.0078
41.64	5.39258	61.9277	66.709	69.0801	78.3223	98.0391
41.74	5.40039	61.9883	66.7676	69.127	78.3691	98.0742
41.84	5.40039	62.0215	66.8086	69.1641	78.4004	98.125
41.94	5.41211	62.0664	66.8418	69.1992	78.4473	98.1582
42.04	5.41992	62.125	66.8965	69.2656	78.5059	98.2207
42.14	5.43164	62.1621	66.9414	69.293	78.541	98.2559
42.24	5.43164	62.2051	66.9961	69.3301	78.584	98.2871
42.34	5.43555	62.2383	67.0449	69.3672	78.6191	98.3164
42.44	5.44922	62.2852	67.0801	69.4043	78.6504	98.3477
42.54	5.46094	62.3301	67.125	69.4531	78.7012	98.3906
42.64	5.46094	62.3691	67.1484	69.4805	78.7285	98.4199
42.74	5.46094	62.4004	67.2031	69.5156	78.7715	98.4512
42.84	5.47266	62.4258	67.2227	69.5488	78.7969	98.4766
42.94	5.4707	62.457	67.2559	69.5762	78.834	98.5
43.04	5.47852	62.5039	67.2949	69.6133	78.8691	98.5449
43.14	5.47852	62.5273	67.3184	69.6387	78.9023	98.5781
43.24	5.48633	62.5801	67.3613	69.6797	78.957	98.6113
43.34	5.48438	62.6074	67.3828	69.7168	78.9941	98.6582
43.44	5.50195	62.6426	67.4199	69.75	79.0215	98.6816
43.54	5.50195	62.6641	67.4609	69.7754	79.0449	98.7207
43.64	5.50195	62.6992	67.4922	69.8086	79.0918	98.7578
43.74	5.50195	62.7363	67.5254	69.8301	79.1191	98.791
43.84	5.51367	62.7695	67.5566	69.8535	79.1621	98.8184
43.94	5.51953	62.8066	67.5898	69.8926	79.2031	98.8613
44.04	5.51172	62.8262	67.5957	69.916	79.2168	98.875
44.14	5.5	62.8574	67.6191	69.9316	79.2461	98.9102
44.24	5.5	62.9063	67.6484	69.9805	79.2793	98.957
44.34	5.5	62.9434	67.6875	70.0234	79.334	98.9902
44.44	5.5	63.0098	67.7422	70.0781	79.3945	99.0508
44.54	5.5	63.0449	67.7813	70.1133	79.4434	99.082
44.64	5.5	63.0996	67.8301	70.1699	79.4922	99.1387
44.74	5.5	63.1367	67.8711	70.2207	79.541	99.1855
44.84	5.5	63.1992	67.9277	70.2754	79.5996	99.2363
44.94	5.51172	63.2637	67.9844	70.332	79.6602	99.291
45.04	5.5	63.3379	68.0488	70.4063	79.7402	99.3691
45.14	5.50391	63.3887	68.1016	70.4551	79.791	99.4277
45.24	5.51172	63.4512	68.1602	70.5195	79.8477	99.4844
45.34	5.51172	63.5059	68.207	70.5703	79.9023	99.5313
45.44	5.51172	63.5625	68.2637	70.6289	79.957	99.5996
45.54	5.5	63.6172	68.3164	70.668	80.0156	99.6445
45.64	5.5	63.6523	68.3496	70.7012	80.0527	99.6816
45.74	5.50391	63.7227	68.4277	70.7715	80.1172	99.7461
45.84	5.50977	63.7793	68.4629	70.8242	80.1621	99.8047
45.94	5.49805	63.8301	68.5117	70.8711	80.2207	99.8535
46.04	5.49609	63.8633	68.5449	70.9102	80.248	99.8828
46.14	5.50195	63.9004	68.5918	70.9492	80.2949	99.9258
46.24	5.50195	63.9512	68.6387	70.9961	80.3457	99.9648
46.34	5.50195	63.9883	68.666	71.0254	80.3828	99.998
46.44	5.50195	64.0293	68.6992	71.0664	80.4219	100.043
46.54	5.50195	64.043	68.7168	71.0996	80.4414	100.055
46.64	5.50195	64.0781	68.748	71.127	80.4746	100.082
46.74	5.50195	64.1133	68.7793	71.1641	80.5	100.119
46.84	5.49023	64.1328	68.7988	71.1797	80.5332	100.146
46.94	5.49023	64.1641	68.8164	71.2188	80.5703	100.164
47.04	5.49023	64.2012	68.834	71.2363	80.5957	100.195
47.14	5.49023	64.2168	68.8477	71.2617	80.6074	100.213
47.24	5.49023	64.25	68.8789	71.3066	80.6387	100.254
47.34	5.49023	64.2832	68.9082	71.3301	80.6855	100.275
47.44	5.49023	64.3223	68.9316	71.3789	80.7148	100.309
47.54	5.49023	64.3633	68.9648	71.4141	80.7441	100.348
47.64	5.49023	64.4023	68.998	71.4609	80.791	100.375
47.74	5.49023	64.4277	69.0234	71.5059	80.8223	100.412
47.84	5.49023	64.4746	69.0449	71.5371	80.8457	100.441
47.94	5.49023	64.5137	69.082	71.5918	80.8848	100.48
48.04	5.49023	64.5508	69.1113	71.6367	80.9199	100.529
48.14	5.49023	64.5996	69.1563	71.6934	80.9648	100.572
48.24	5.50195	64.625	69.1934	71.7246	81.0117	100.604
48.34	5.50195	64.666	69.2227	71.7656	81.0488	100.635
48.44	5.50195	64.6953	69.2422	71.793	81.0586	100.646
48.54	5.50195	64.7207	69.2754	71.8223	81.0957	100.676
48.64	5.49805	64.7734	69.3203	71.8652	81.1348	100.715
48.74	5.49219	64.8047	69.3496	71.916	81.168	100.758
48.84	5.49219	64.834	69.375	71.9414	81.1934	100.775
48.94	5.49219	64.8652	69.4043	71.9746	81.2363	100.805
49.04	5.49219	64.9102	69.4453	72.002	81.2637	100.83
49.14	5.5	64.9336	69.4844	72.0488	81.3027	100.867
49.24	5.5	64.9707	69.5176	72.082	81.3301	100.9
49.34	5.5	64.9941	69.5391	72.1191	81.373	100.924
49.44	5.51172	65.0527	69.584	72.168	81.4199	100.975
49.54	5.51172	65.0898	69.6016	72.1895	81.4414	100.992
49.64	5.51172	65.1309	69.6426	72.207	81.4863	101.029
49.74	5.51172	65.166	69.6699	72.2441	81.5215	101.066
49.84	5.51172	65.2129	69.7051	72.2852	81.5605	101.104
49.94	5.51172	65.2461	69.7422	72.3125	81.5957	101.139
50.04	5.51172	65.2773	69.7793	72.334	81.623	101.162
50.14	5.51172	65.3145	69.8125	72.3574	81.6621	101.193
50.24	5.51172	65.3594	69.8438	72.3867	81.7051	101.223
50.34	5.51172	65.3965	69.877	72.4238	81.7324	101.248
50.44	5.51172	65.4238	69.9043	72.4609	81.7578	101.277
50.54	5.52344	65.4531	69.918	72.4785	81.7832	101.301
50.64	5.52344	65.4902	69.9609	72.498	81.8203	101.332
50.74	5.51563	65.5332	69.9863	72.543	81.8555	101.365
50.84	5.52148	65.5645	70.0176	72.5781	81.8809	101.387
50.94	5.52148	65.5918	70.0371	72.6113	81.916	101.406
51.04	5.5332	65.623	70.0684	72.6563	81.9473	101.449
51.14	5.52148	65.6641	70.0977	72.6895	81.9785	101.475
51.24	5.52148	65.6914	70.1133	72.709	82.0137	101.5
51.34	5.52148	65.7246	70.1445	72.7383	82.041	101.523
51.44	5.52148	65.7539	70.1641	72.7734	82.0781	101.557
51.54	5.51758	65.8047	70.2109	72.8184	82.123	101.6
51.64	5.52344	65.8184	70.2285	72.8398	82.1426	101.615
51.74	5.52734	65.8555	70.2422	72.8848	82.1758	101.643
51.84	5.5332	65.9004	70.2832	72.9375	82.2188	101.691
51.94	5.54102	65.9141	70.2949	72.9473	82.2363	101.697
52.04	5.54102	65.9531	70.3379	73	82.2773	101.74
52.14	5.53711	65.9844	70.375	73.0371	82.3145	101.77
52.24	5.53125	66.0215	70.4004	73.0762	82.3379	101.813
52.34	5.53125	66.0645	70.4199	73.0996	82.3633	101.844
52.44	5.54297	66.1016	70.4473	73.1406	82.4043	101.871
52.54	5.54297	66.1367	70.4727	73.1719	82.4316	101.9
52.64	5.53906	66.168	70.5059	73.209	82.4688	101.939
52.74	5.53906	66.2051	70.5332	73.2285	82.5039	101.969
52.84	5.53906	66.2324	70.5508	73.2441	82.5234	101.994
52.94	5.53516	66.2676	70.5781	73.2578	82.5488	102.018
53.04	5.54102	66.3086	70.6133	73.2773	82.5957	102.057
53.14	5.54102	66.3418	70.6387	73.3223	82.6152	102.08
53.24	5.54883	66.3535	70.6602	73.3418	82.6387	102.107
53.34	5.54492	66.3984	70.6836	73.3711	82.6699	102.139
53.44	5.55078	66.4355	70.707	73.3984	82.6934	102.166
53.54	5.55078	66.4727	70.7617	73.4434	82.7441	102.201
53.64	5.55859	66.5	70.791	73.4785	82.7813	102.232
53.74	5.56055	66.5313	70.8145	73.5195	82.8086	102.268
53.84	5.57227	66.5625	70.8379	73.5449	82.8438	102.293
53.94	5.57227	66.6035	70.8672	73.582	82.8711	102.332
54.04	5.57227	66.6309	70.8926	73.6211	82.9082	102.361
54.14	5.58008	66.6738	70.9082	73.6445	82.9316	102.391
54.24	5.58008	66.6992	70.9551	73.6875	82.9707	102.426
54.34	5.57617	66.7246	70.9727	73.7168	82.9844	102.443
54.44	5.57031	66.7617	71.0098	73.7598	83.0215	102.492
54.54	5.57031	66.7988	71.0449	73.793	83.0547	102.516
54.64	5.56641	66.8301	71.0742	73.8223	83.0879	102.547
54.74	5.57227	66.8555	71.0859	73.834	83.1055	102.564
54.84	5.57227	66.873	71.1191	73.873	83.1289	102.586
54.94	5.56836	66.9043	71.1523	73.8965	83.1523	102.613
55.04	5.57031	66.9395	71.1738	73.9258	83.1855	102.635
55.14	5.56641	66.9551	71.1992	73.9375	83.2109	102.652
55.24	5.57227	66.998	71.2285	73.9824	83.252	102.695
55.34	5.56836	67.0254	71.248	74.0137	83.2754	102.701
55.44	5.56055	67.0449	71.2676	74.041	83.2988	102.732
55.54	5.55664	67.0801	71.2891	74.0586	83.334	102.754
55.64	5.55078	67.1152	71.3184	74.082	83.3652	102.791
55.74	5.54688	67.1406	71.3555	74.1172	83.3965	102.83
55.84	5.54883	67.1816	71.3848	74.1387	83.4258	102.857
55.94	5.55664	67.2012	71.3965	74.1563	83.4395	102.871
56.04	5.55078	67.2363	71.4395	74.1953	83.4824	102.912
56.14	5.55078	67.2754	71.4805	74.2246	83.5098	102.941
56.24	5.55859	67.3008	71.5039	74.248	83.5371	102.979
56.34	5.55273	67.3379	71.5273	74.2793	83.5664	103
56.44	5.56055	67.3652	71.5469	74.3105	83.5898	103.033
56.54	5.56445	67.3906	71.5859	74.3379	83.6211	103.059
56.64	5.58984	67.4121	71.6094	74.375	83.6602	103.086
56.74	5.58984	67.4414	71.6367	74.4102	83.6953	103.121
56.84	5.58594	67.4883	71.668	74.4395	83.7129	103.152
56.94	5.57617	67.5078	71.6992	74.4648	83.7402	103.176
57.04	5.5625	67.5313	71.7168	74.4844	83.7734	103.197
57.14	5.5625	67.5605	71.7461	74.5176	83.8027	103.221
57.24	5.55078	67.5859	71.7793	74.5488	83.8262	103.256
57.34	5.54688	67.6426	71.8281	74.5977	83.8711	103.307
57.44	5.54102	67.666	71.8594	74.623	83.8945	103.33
57.54	5.5293	67.6777	71.8613	74.625	83.8984	103.336
57.64	5.54102	67.7188	71.8789	74.6543	83.9297	103.365
57.74	5.54102	67.7422	71.916	74.6875	83.9629	103.396
57.84	5.54102	67.7734	71.9297	74.7012	84.0039	103.422
57.94	5.54492	67.8086	71.9609	74.7324	84.0488	103.461
58.04	5.55078	67.8398	71.9824	74.7598	84.084	103.5
58.14	5.55469	67.8672	71.9902	74.7969	84.1055	103.514
58.24	5.57617	67.8848	72.0137	74.8242	84.1094	103.531
58.34	5.5625	67.9023	72.043	74.8535	84.1289	103.559
58.44	5.5332	67.9082	72.0566	74.8672	84.1367	103.561
58.54	5.51758	67.9238	72.0801	74.8984	84.1699	103.58
58.64	5.48438	67.9688	72.1387	74.9512	84.2168	103.623
58.74	5.48242	67.9902	72.1641	74.9551	84.248	103.658
58.84	5.46094	68.0273	72.1855	74.9785	84.2715	103.674
58.94	5.42578	68.0313	72.2051	74.9922	84.2832	103.695
59.04	5.4082	68.0508	72.2383	75.0469	84.2891	103.748
59.14	5.39453	68.0703	72.2754	75.0723	84.3145	103.779
59.24	5.3457	68.1055	72.3145	75.1133	84.3535	103.809
59.34	5.31836	68.1426	72.3457	75.1523	84.3945	103.865
59.44	5.31055	68.207	72.4355	75.2109	84.4512	103.908
59.54	5.31836	68.1934	72.4258	75.2109	84.4355	103.898
59.64	5.32227	68.2734	72.3652	75.1445	84.4844	103.977
59.74	5.39648	67.959	72.1543	74.8613	84.2988	103.766
60.24	10.1582	62.707	67.4648	67.6152	72.4492	80.2344
60.34	9.72266	65.5586	67.8848	68.0059	72.8574	81.4922
60.44	8.75977	64.918	66.9805	67.6035	71.3066	79.4902
60.54	8.37305	64.2891	66.4863	67.0801	70.4102	77.873
60.64	7.92383	63.8008	65.9707	66.375	69.6758	76.8633
60.74	7.66211	63.5703	65.5859	65.9395	69.207	76.0898
60.84	7.70898	63.168	65.2793	65.5703	68.8066	75.5371
60.94	7.67578	62.8125	64.8926	65.2188	68.3066	74.9805
61.04	7.69531	62.6113	64.6445	64.8652	67.998	74.6934
61.14	7.69922	62.293	64.3516	64.7832	67.791	74.4453
61.24	7.67969	62.041	64.2246	64.5918	67.5293	74.0566
61.34	7.62891	61.7461	63.9727	64.3711	67.3184	73.6172
61.44	7.58594	61.4766	63.7109	64.0879	67.0918	73.2871
61.54	7.55664	61.2617	63.4648	63.8359	66.8027	72.9707
61.64	7.52344	61.0977	63.2656	63.6289	66.5566	72.7246
61.74	7.49805	60.8652	63.0332	63.3848	66.3066	72.4512
61.84	7.45898	60.7012	62.793	63.123	66.0449	72.1465
61.94	7.42773	60.5234	62.584	62.9199	65.8008	71.9355
62.04	7.39063	60.3262	62.3555	62.7129	65.5508	71.6621
62.14	7.33594	60.1387	62.1563	62.5039	65.3008	71.3867
62.24	7.31055	59.957	61.9375	62.2832	65.0449	71.0898
62.34	7.29492	59.748	61.7285	62.0645	64.8086	70.8223
62.44	7.27344	59.5391	61.5371	61.8457	64.5742	70.5508
62.54	7.25195	59.3418	61.3008	61.623	64.3398	70.3438
62.64	7.23242	59.1328	61.0664	61.3652	64.1055	70.0996
62.74	7.21289	58.9297	60.8457	61.1523	63.8809	69.8184
62.84	7.19531	58.707	60.6152	60.9414	63.6367	69.5703
62.94	7.16992	58.498	60.4102	60.7207	63.3887	69.2969
63.04	7.15039	58.3027	60.1953	60.4883	63.1504	69.0293
63.14	7.11914	58.0957	59.9863	60.207	62.9023	68.7754
63.24	7.10352	57.8926	59.7656	60	62.6875	68.5234
63.34	7.10156	57.6934	59.5449	59.791	62.4609	68.252
63.44	7.07031	57.4863	59.3125	59.5957	62.2188	67.9453
63.54	7.05078	57.2988	59.1016	59.3848	61.9922	67.6816
63.64	7.03516	57.0859	58.8945	59.1836	61.7754	67.4316
63.74	7.03125	56.9063	58.6855	58.9902	61.5371	67.1895
63.84	7.02344	56.709	58.4941	58.7793	61.3066	66.9219
63.94	6.99609	56.502	58.2949	58.582	61.0898	66.6699
64.04	6.98242	56.3105	58.082	58.375	60.875	66.4043
64.14	6.9668	56.1367	57.8984	58.1992	60.6855	66.1602
64.24	6.95313	55.9688	57.7109	58.0098	60.4844	65.918
64.34	6.94141	55.7676	57.5039	57.8281	60.2754	65.6719
64.44	6.91016	55.5859	57.3184	57.6348	60.0488	65.4277
64.54	6.89063	55.4063	57.1367	57.4492	59.8477	65.2188
64.64	6.875	55.2148	56.9512	57.25	59.6504	64.9961
64.74	6.86133	55.0352	56.7676	57.0723	59.4434	64.7656
64.84	6.85352	54.8301	56.5957	56.8887	59.2383	64.5273
64.94	6.83984	54.6563	56.4141	56.6895	59.0215	64.3125
65.04	6.82031	54.4863	56.2441	56.502	58.8262	64.0957
65.14	6.80078	54.3242	56.0781	56.3027	58.6328	63.8652
65.24	6.78125	54.1523	55.8848	56.082	58.4219	63.6523
65.34	6.76172	53.9727	55.6992	55.8887	58.2266	63.416
65.44	6.74609	53.8008	55.5234	55.6914	58.0254	63.2051
65.54	6.74023	53.6426	55.3535	55.5137	57.8555	62.9902
65.64	6.7207	53.4902	55.1914	55.3457	57.6816	62.7715
65.74	6.70508	53.3242	55.0195	55.1621	57.4902	62.5527
65.84	6.69141	53.168	54.8438	54.9648	57.3145	62.3516
65.94	6.67188	53.0215	54.668	54.8242	57.1406	62.1152
66.04	6.66016	52.8535	54.4766	54.6875	56.9414	61.9004
66.14	6.64063	52.6934	54.2832	54.5547	56.7578	61.6816
66.24	6.625	52.5176	54.1211	54.4141	56.5547	61.4727
66.34	6.61914	52.3633	53.9688	54.2832	56.3887	61.2676
66.44	6.59961	52.1836	53.8086	54.1426	56.2012	61.0605
66.54	6.58008	52.0137	53.6484	53.9941	56.0215	60.8555
66.64	6.57227	51.8457	53.4805	53.8457	55.8457	60.6602
66.74	6.55469	51.6816	53.3086	53.6934	55.6602	60.4668
66.84	6.5293	51.5254	53.1484	53.5332	55.4922	60.2715
66.94	6.51367	51.3633	52.9844	53.3652	55.3047	60.0703
67.04	6.5	51.2031	52.8262	53.209	55.1191	59.8906
67.14	6.48828	51.0527	52.6387	53.043	54.9629	59.6855
67.24	6.46875	50.8965	52.5059	52.8672	54.793	59.4941
67.34	6.46094	50.7441	52.3477	52.6953	54.6328	59.3203
67.44	6.44141	50.5879	52.1797	52.5039	54.4512	59.1309
67.54	6.42969	50.4531	52.0195	52.3281	54.291	58.9609
67.64	6.41016	50.3047	51.8691	52.1543	54.1211	58.7754
67.74	6.39063	50.1602	51.709	52.0098	53.9453	58.5762
67.84	6.38281	50.0059	51.5488	51.8398	53.7793	58.3887
67.94	6.37109	49.8633	51.377	51.6543	53.6074	58.2129
68.04	6.35156	49.7031	51.2051	51.4863	53.4395	58.0352
68.14	6.33984	49.5469	51.0586	51.3223	53.2832	57.8555
68.24	6.33594	49.4043	50.9102	51.166	53.1094	57.6914
68.34	6.33008	49.252	50.7578	51.0215	52.9492	57.5215
68.44	6.32227	49.0957	50.5977	50.8633	52.7891	57.3086
68.54	6.31055	48.9727	50.4453	50.7344	52.6406	57.1191
68.64	6.29102	48.8008	50.2793	50.5742	52.4805	56.9102
68.74	6.2832	48.6523	50.127	50.4219	52.3398	56.7266
68.84	6.27148	48.5078	49.9902	50.2734	52.1797	56.543
68.94	6.25586	48.3496	49.8457	50.1133	52	56.3535
69.04	6.24219	48.2148	49.7031	49.9551	51.8438	56.1602
69.14	6.22266	48.0684	49.5527	49.7988	51.6777	55.9668
69.24	6.21094	47.9141	49.4004	49.6563	51.5313	55.7715
69.34	6.21484	47.7656	49.248	49.4727	51.3594	55.5547
69.44	6.20117	47.6309	49.0957	49.3242	51.2148	55.3828
69.54	6.20117	47.4824	48.9453	49.1719	51.0332	55.2129
69.64	6.18164	47.3574	48.8223	49.0176	50.8848	55.0547
69.74	6.18164	47.2344	48.6797	48.8633	50.7109	54.8789
69.84	6.16992	47.0859	48.543	48.707	50.543	54.7227
69.94	6.15039	46.9473	48.377	48.5645	50.3691	54.541
70.04	6.13867	46.8242	48.2207	48.4395	50.2441	54.3828
70.14	6.125	46.6758	48.0684	48.3164	50.0898	54.2129
70.24	6.11914	46.543	47.9531	48.1836	49.9414	54.0625
70.34	6.10547	46.4141	47.8262	48.0352	49.7813	53.9004
70.44	6.10742	46.293	47.707	47.9063	49.6602	53.7578
70.54	6.08984	46.1641	47.5781	47.7637	49.5117	53.5996
70.64	6.08203	46.0391	47.4688	47.6152	49.3926	53.4688
70.74	6.07031	45.9082	47.3438	47.4902	49.2559	53.3164
70.84	6.0625	45.7656	47.2402	47.3555	49.1094	53.1504
70.94	6.05078	45.6387	47.1309	47.2266	48.9609	52.9883
71.04	6.05078	45.5078	47.0293	47.0625	48.8281	52.8398
71.14	6.04297	45.3926	46.9316	46.9297	48.6914	52.709
71.24	6.03125	45.2441	46.8301	46.7754	48.5313	52.5527
71.34	6.02344	45.123	46.6934	46.6348	48.3906	52.4063
71.44	6.01172	44.9824	46.5586	46.4941	48.2344	52.2383
71.54	6	44.8535	46.3984	46.3652	48.0918	52.0781
71.64	5.99219	44.7207	46.2578	46.2246	47.959	51.9258
71.74	5.98047	44.6035	46.1094	46.1152	47.8418	51.7734
71.84	5.96875	44.4824	45.9688	45.9785	47.709	51.6152
71.94	5.96094	44.3652	45.8203	45.8594	47.5723	51.4785
72.04	5.96094	44.2168	45.6836	45.7246	47.4434	51.3184
72.14	5.94922	44.1074	45.5488	45.6074	47.3301	51.1699
72.24	5.94141	43.9844	45.3809	45.4727	47.2012	51.0273
72.34	5.92969	43.8711	45.2363	45.3516	47.0645	50.8984
72.44	5.92969	43.7422	45.0801	45.2227	46.9336	50.7363
72.54	5.92188	43.6133	44.9473	45.0977	46.8105	50.5918
72.64	5.91016	43.4844	44.8105	44.9629	46.6816	50.457
72.74	5.89844	43.3711	44.6777	44.8418	46.5371	50.3242
72.84	5.89063	43.2734	44.5684	44.7129	46.4004	50.1953
72.94	5.87891	43.1641	44.4395	44.584	46.252	50.0391
73.04	5.87891	43.0625	44.2793	44.4434	46.1387	49.8945
73.14	5.85938	42.9805	44.1582	44.3262	46.0176	49.7539
73.24	5.85547	42.8613	44.0078	44.1992	45.8594	49.5957
73.34	5.8457	42.7637	43.8945	44.0996	45.7305	49.4473
73.44	5.83984	42.6348	43.7676	43.9961	45.5898	49.3145
73.54	5.82422	42.543	43.6543	43.873	45.4648	49.1777
73.64	5.81055	42.4297	43.5352	43.7324	45.3301	49.0332
73.74	5.80273	42.2988	43.4277	43.6309	45.2051	48.8945
73.84	5.80078	42.1719	43.3301	43.5391	45.1055	48.7363
73.94	5.78906	42.0547	43.2051	43.4355	44.9824	48.5879
74.04	5.77734	41.9219	43.1094	43.3379	44.8691	48.459
74.14	5.77148	41.793	42.9805	43.2539	44.7402	48.3262
74.24	5.76367	41.6445	42.8691	43.1484	44.6113	48.1895
74.34	5.76172	41.5547	42.752	43.0566	44.4902	48.0684
74.44	5.75	41.4453	42.6426	42.9668	44.3691	47.9238
74.54	5.73828	41.3516	42.5449	42.791	44.2461	47.7969
74.64	5.73047	41.2227	42.4102	42.6211	44.1309	47.6484
74.74	5.71875	41.1328	42.2813	42.4785	44.0215	47.5078
74.84	5.70703	41.0234	42.1602	42.3008	43.8926	47.3711
74.94	5.70117	40.9258	42.0664	42.0996	43.7715	47.25
75.04	5.68945	40.8145	41.9609	42.0313	43.6719	47.1387
75.14	5.68164	40.7129	41.8281	41.9121	43.5469	47.0059
75.24	5.68164	40.6113	41.7305	41.7988	43.4492	46.877
75.34	5.66992	40.5215	41.6133	41.6875	43.3398	46.7754
75.44	5.66211	40.4004	41.5176	41.5801	43.2148	46.666
75.54	5.65039	40.2734	41.3945	41.4492	43.1113	46.5391
75.64	5.63867	40.1523	41.2871	41.3555	42.998	46.4297
75.74	5.63086	40.0547	41.1895	41.25	42.8691	46.3086
75.84	5.61914	39.9453	41.0918	41.1348	42.7598	46.1992
75.94	5.61914	39.8203	40.9766	41.0176	42.6465	46.0664
76.04	5.61133	39.6934	40.8574	40.916	42.5352	45.9277
76.14	5.59961	39.5918	40.7402	40.8184	42.4199	45.8066
76.24	5.5918	39.4746	40.623	40.6992	42.2988	45.6895
76.34	5.58008	39.3574	40.5273	40.5918	42.1777	45.5762
76.44	5.56836	39.2422	40.418	40.498	42.0488	45.4277
76.54	5.56055	39.125	40.3008	40.3906	41.9395	45.3105
76.64	5.54883	39.0156	40.1914	40.2988	41.8223	45.1973
76.74	5.54102	38.916	40.0996	40.1992	41.7109	45.084
76.84	5.5293	38.8184	39.9824	40.0996	41.6016	44.9688
76.94	5.52148	38.7188	39.875	39.9883	41.4883	44.8242
77.04	5.50977	38.5918	39.7402	39.873	41.3613	44.7012
77.14	5.50977	38.4902	39.6191	39.7676	41.2754	44.5918
77.24	5.50195	38.3848	39.5176	39.6582	41.1621	44.457
77.34	5.49414	38.3047	39.4238	39.5781	41.0645	44.3516
77.44	5.5	38.1992	39.2969	39.4688	40.9395	44.2148
77.54	5.48047	38.1133	39.207	39.373	40.8223	44.0977
77.64	5.48047	38.0117	39.1289	39.2754	40.7324	43.9883
77.74	5.46875	37.9258	39.0195	39.166	40.623	43.8594
77.84	5.46094	37.8398	38.9141	39.041	40.5176	43.7422
77.94	5.44922	37.7324	38.8105	38.9258	40.418	43.6191
78.04	5.44141	37.623	38.7168	38.8242	40.3105	43.498
78.14	5.42969	37.5215	38.6191	38.7227	40.2012	43.377
78.24	5.42188	37.4434	38.5293	38.6172	40.084	43.2715
78.34	5.41016	37.3574	38.4395	38.5234	39.9707	43.1621
78.44	5.39844	37.2441	38.3301	38.4141	39.8652	43.043
78.54	5.39063	37.1465	38.2402	38.3047	39.7617	42.9199
78.64	5.39063	37.0332	38.1074	38.2031	39.6602	42.7949
78.74	5.38281	36.9414	38	38.0957	39.5332	42.6797
78.84	5.38281	36.8457	37.9023	38.002	39.4121	42.5703
78.94	5.37109	36.7324	37.7969	37.9141	39.291	42.457
79.04	5.35156	36.6465	37.6797	37.8164	39.1934	42.3516
79.14	5.33984	36.5684	37.5781	37.7266	39.084	42.2598
79.24	5.33203	36.4844	37.4883	37.6289	38.9902	42.166
79.34	5.33594	36.3945	37.3789	37.5566	38.8809	42.0488
79.44	5.32227	36.3164	37.2813	37.4785	38.7832	41.959
79.54	5.32227	36.2422	37.168	37.377	38.6816	41.8457
79.64	5.31055	36.1445	37.0898	37.2969	38.6035	41.752
79.74	5.30273	36.0547	37	37.207	38.4824	41.6641
79.84	5.29102	35.9727	36.9102	37.1094	38.3848	41.541
79.94	5.2832	35.8828	36.8281	37.0059	38.293	41.4375
80.04	5.26758	35.793	36.7461	36.9238	38.2188	41.3555
80.14	5.24609	35.6836	36.668	36.8223	38.1016	41.2461
80.24	5.23633	35.5859	36.5703	36.7246	38.0117	41.1406
80.34	5.22266	35.4844	36.4766	36.6426	37.9219	41.0469
80.44	5.22266	35.3906	36.4063	36.5645	37.8281	40.9453
80.54	5.21094	35.2754	36.3262	36.4688	37.7051	40.8301
80.64	5.20313	35.1816	36.2227	36.375	37.5957	40.7168
80.74	5.20313	35.0957	36.1387	36.2695	37.4922	40.6191
80.84	5.19141	35.0137	36.0488	36.1777	37.4023	40.498
80.94	5.1875	34.9043	35.9395	36.0684	37.3164	40.4004
81.04	5.18164	34.7949	35.8379	35.9668	37.2207	40.2988
81.14	5.16992	34.7051	35.7402	35.8535	37.123	40.1816
81.24	5.16211	34.6309	35.6504	35.7441	37.0215	40.0781
81.34	5.16211	34.5547	35.5684	35.6543	36.9277	39.9883
81.44	5.15039	34.4766	35.4785	35.5566	36.8438	39.8906
81.54	5.15039	34.3828	35.3848	35.4551	36.7617	39.7773
81.64	5.13086	34.293	35.2695	35.334	36.6719	39.6836
81.74	5.13086	34.1992	35.1836	35.2246	36.5781	39.5723
81.84	5.12305	34.1152	35.0918	35.1465	36.4824	39.4688
81.94	5.11133	34.0371	35.0098	35.0645	36.3926	39.375
82.04	5.11133	33.9648	34.9121	34.9863	36.291	39.2656
82.14	5.0918	33.8828	34.8242	34.916	36.2207	39.1719
82.24	5.0918	33.8047	34.7324	34.8262	36.123	39.0684
82.34	5.08008	33.7266	34.6602	34.7559	36.0215	38.9668
82.44	5.07227	33.6328	34.5625	34.6934	35.9395	38.877
82.54	5.05664	33.5664	34.4707	34.6074	35.8379	38.7793
82.64	5.04297	33.4805	34.373	34.5332	35.7656	38.6855
82.74	5.04297	33.4043	34.2988	34.4648	35.6914	38.5586
82.84	5.03125	33.334	34.2207	34.3945	35.6172	38.4688
82.94	5.02344	33.2637	34.1387	34.3047	35.5527	38.375
83.04	5.02344	33.1816	34.0293	34.2148	35.4824	38.2656
83.14	5.01172	33.0996	33.9746	34.1406	35.4277	38.1875
83.24	5	33.0234	33.8984	34.0449	35.3711	38.0977
83.34	4.99219	32.9453	33.8086	33.9551	35.3125	38.0078
83.44	4.99219	32.8555	33.7188	33.877	35.2344	37.9063
83.54	4.98047	32.7734	33.6367	33.7988	35.1602	37.8281
83.64	4.97266	32.6836	33.5703	33.7344	35.0625	37.7383
83.74	4.97266	32.5938	33.4844	33.6602	34.9805	37.6367
83.84	4.96094	32.5039	33.3848	33.5762	34.8828	37.5664
83.94	4.96094	32.3945	33.3086	33.4902	34.7734	37.4688
84.04	4.94922	32.3164	33.2422	33.4258	34.6953	37.3789
84.14	4.92969	32.2324	33.1699	33.3652	34.5801	37.3066
84.24	4.92969	32.1738	33.0684	33.2871	34.4746	37.2285
84.34	4.92188	32.0957	32.9707	33.2051	34.3379	37.1426
84.44	4.91016	32.002	32.8887	33.123	34.2227	37.0762
84.54	4.91016	31.9355	32.7988	33.0254	34.1191	36.9863
84.64	4.91016	31.8828	32.7285	32.9473	34.0332	36.9199
84.74	4.89844	31.832	32.6387	32.8457	33.9707	36.8496
84.84	4.89063	31.7578	32.5762	32.7715	33.8848	36.7637
84.94	4.89063	31.7012	32.5273	32.6816	33.8008	36.6758
85.04	4.87891	31.6426	32.4414	32.6035	33.7031	36.5977
85.14	4.87109	31.5645	32.3477	32.5098	33.6211	36.5313
85.24	4.87109	31.4785	32.2617	32.4219	33.5313	36.4375
85.34	4.85938	31.3945	32.1953	32.3359	33.4492	36.3477
85.44	4.85156	31.3047	32.1367	32.25	33.375	36.2734
85.54	4.84766	31.2422	32.0684	32.1934	33.3145	36.166
85.64	4.83398	31.1523	32.0098	32.1348	33.2227	36.0605
85.74	4.82813	31.0742	31.9316	32.0566	33.1406	35.9512
85.84	4.81641	30.9922	31.8809	32.0137	33.0586	35.8574
85.94	4.81055	30.9219	31.7988	31.9355	32.9609	35.7871
86.04	4.79883	30.8555	31.7324	31.8652	32.8906	35.7207
86.14	4.79102	30.7852	31.6699	31.7949	32.8125	35.6387
86.24	4.79102	30.7031	31.5996	31.7168	32.707	35.5371
86.34	4.7793	30.6328	31.5371	31.6426	32.6445	35.4629
86.44	4.77148	30.5742	31.4707	31.5762	32.5703	35.377
86.54	4.75977	30.5039	31.4004	31.5098	32.5	35.3027
86.64	4.75977	30.4023	31.3262	31.4258	32.4082	35.2188
86.74	4.75977	30.3398	31.2578	31.3516	32.3379	35.1641
86.84	4.75195	30.248	31.168	31.2734	32.2559	35.0547
86.94	4.74023	30.1758	31.1094	31.1953	32.1719	34.9766
87.04	4.72852	30.0938	31.0313	31.1055	32.0859	34.8789
87.14	4.7207	30.0234	30.9609	31.043	32.0098	34.7852
87.24	4.7207	29.9414	30.8789	30.9609	31.9238	34.6953
87.34	4.7207	29.8516	30.8242	30.8887	31.8633	34.625
87.44	4.70117	29.7813	30.748	30.8125	31.7793	34.5156
87.54	4.70117	29.7227	30.6895	30.7422	31.7402	34.4258
87.64	4.68945	29.6719	30.5879	30.6641	31.6895	34.3359
87.74	4.68945	29.6445	30.5332	30.5859	31.6348	34.25
87.84	4.68164	29.5977	30.4707	30.5078	31.5859	34.168
87.94	4.67383	29.543	30.3887	30.4316	31.502	34.0742
88.04	4.67969	29.4785	30.3047	30.3633	31.4785	33.9863
88.14	4.66797	29.4434	30.2246	30.3047	31.4316	33.9277
88.24	4.65039	29.3965	30.168	30.2383	31.3926	33.8613
88.34	4.65039	29.375	30.0938	30.1777	31.3711	33.7773
88.44	4.63867	29.3438	30.0313	30.1191	31.332	33.6953
88.54	4.63867	29.3008	29.9492	30.043	31.2891	33.6367
88.64	4.63086	29.2617	29.8828	29.9531	31.25	33.5664
88.74	4.63086	29.1914	29.834	29.8828	31.168	33.4922
88.84	4.61914	29.1328	29.7422	29.8164	31.082	33.4277
88.94	4.61914	29.0625	29.6602	29.7539	31.0078	33.3457
89.04	4.61133	28.9727	29.6133	29.6953	30.9219	33.2988
89.14	4.59961	28.8945	29.5391	29.6133	30.8203	33.2402
89.24	4.5957	28.8125	29.4805	29.5234	30.7148	33.168
89.34	4.58203	28.7227	29.4063	29.4609	30.6191	33.1055
89.44	4.57031	28.6563	29.3398	29.3945	30.541	33.0469
89.54	4.57031	28.5625	29.2695	29.3125	30.4395	32.9648
89.64	4.55859	28.4766	29.2227	29.2773	30.3418	32.918
89.74	4.55078	28.3711	29.1523	29.1953	30.2207	32.8477
89.84	4.55078	28.2832	29.0898	29.1133	30.1387	32.7773
89.94	4.53906	28.1855	29.043	29.0547	30.0605	32.7148
90.04	4.53906	28.0957	28.9766	28.9844	29.9707	32.6387
90.14	4.53125	28.0137	28.9023	28.9063	29.9004	32.5684
90.24	4.53125	27.9629	28.8594	28.8555	29.8418	32.498
90.34	4.51953	27.9004	28.7773	28.7813	29.7637	32.4238
90.44	4.51953	27.8203	28.7207	28.7051	29.6895	32.3359
90.54	4.51563	27.7363	28.6465	28.6504	29.623	32.2695
90.64	4.50195	27.6973	28.5723	28.5859	29.5645	32.2031
90.74	4.50195	27.6523	28.5293	28.5195	29.5	32.1152
90.84	4.49023	27.6094	28.4707	28.4434	29.4453	32.0488
90.94	4.49023	27.5566	28.4004	28.377	29.3633	31.9785
91.04	4.48242	27.5059	28.3184	28.3145	29.3047	31.8848
91.14	4.47852	27.4336	28.2207	28.2441	29.2441	31.7988
91.24	4.46094	27.4023	28.1621	28.1934	29.1992	31.7246
91.34	4.46094	27.3379	28.0801	28.125	29.127	31.6484
91.44	4.46094	27.2773	28.0098	28.0625	29.0508	31.5781
91.54	4.44922	27.2207	27.9277	27.9922	28.9922	31.5098
91.64	4.44922	27.1602	27.875	27.9395	28.9258	31.4316
91.74	4.44141	27.1289	27.8223	27.875	28.877	31.3672
91.84	4.44141	27.0605	27.7715	27.8242	28.832	31.3086
91.94	4.42969	26.9941	27.7129	27.7773	28.7969	31.2578
92.04	4.42969	26.9316	27.6348	27.7109	28.7285	31.1836
92.14	4.42188	26.8594	27.5625	27.6387	28.6641	31.1152
92.24	4.42188	26.7988	27.5039	27.5781	28.6035	31.0723
92.34	4.42188	26.7344	27.4512	27.5137	28.5195	31.0078
92.44	4.41016	26.668	27.3926	27.4473	28.4609	30.9297
92.54	4.41016	26.5781	27.334	27.3887	28.4063	30.8555
92.64	4.40234	26.4922	27.2676	27.3145	28.3496	30.7871
92.74	4.40234	26.4297	27.2207	27.2637	28.2793	30.7129
92.84	4.40234	26.3691	27.1699	27.2129	28.2285	30.6563
92.94	4.39063	26.3086	27.1113	27.1426	28.1504	30.5781
93.04	4.39063	26.248	27.0527	27.0957	28.084	30.5195
93.14	4.39063	26.1934	26.9941	27.0449	28.0098	30.4375
93.24	4.39063	26.1348	26.9414	26.9551	27.9316	30.3672
93.34	4.38281	26.0723	26.8789	26.9043	27.8574	30.3125
93.44	4.38281	26.0137	26.8086	26.8535	27.7793	30.2363
93.54	4.38281	25.9551	26.75	26.8066	27.7324	30.1895
93.64	4.38281	25.9043	26.6875	26.7637	27.6699	30.127
93.74	4.37109	25.8613	26.627	26.6973	27.6113	30.0566
93.84	4.37109	25.8047	26.5898	26.6582	27.541	29.9883
93.94	4.37109	25.7539	26.5313	26.6016	27.4824	29.9102
94.04	4.36719	25.7148	26.4805	26.5371	27.4277	29.8516
94.14	4.34961	25.6563	26.4297	26.4844	27.373	29.7793
94.24	4.34961	25.6133	26.3789	26.4258	27.3105	29.7168
94.34	4.34961	25.543	26.3086	26.3555	27.252	29.6348
94.44	4.3418	25.5039	26.2617	26.3047	27.2012	29.5977
94.54	4.3418	25.4336	26.1797	26.2461	27.1348	29.5234
94.64	4.3418	25.3711	26.1289	26.1836	27.0898	29.4473
94.74	4.3418	25.3242	26.0703	26.1367	27.0391	29.3887
94.84	4.33008	25.2578	26.0352	26.0703	26.9766	29.3496
94.94	4.33008	25.2051	25.9707	25.9863	26.9121	29.3047
95.04	4.33008	25.1465	25.916	25.916	26.8535	29.248
95.14	4.32617	25.0957	25.8711	25.8535	26.791	29.2051
95.24	4.32422	25.0371	25.8125	25.7988	26.7441	29.1719
95.34	4.33008	24.9746	25.7539	25.7324	26.6699	29.1172
95.44	4.32617	24.916	25.7051	25.6855	26.623	29.0742
95.54	4.3125	24.8652	25.6602	25.623	26.5645	29.0176
95.64	4.3125	24.8145	25.6016	25.5762	26.5254	28.9785
95.74	4.30078	24.7832	25.5469	25.5215	26.4785	28.9434
95.84	4.30078	24.7129	25.4883	25.4512	26.4199	28.8867
95.94	4.30078	24.6543	25.418	25.3926	26.3613	28.832
96.04	4.30078	24.6035	25.3711	25.334	26.3145	28.7988
96.14	4.29297	24.5527	25.3203	25.2754	26.252	28.7676
96.24	4.28125	24.4941	25.2539	25.209	26.1973	28.709
96.34	4.28125	24.4551	25.209	25.1641	26.1602	28.6426
96.44	4.28125	24.3926	25.1504	25.1055	26.0977	28.5664
96.54	4.26953	24.3418	25.0801	25.0547	26.0449	28.498
96.64	4.26172	24.2949	25.0176	25.0039	25.9922	28.4355
96.74	4.26172	24.2324	24.9648	24.9531	25.9375	28.3652
96.84	4.26172	24.1699	24.9238	24.8945	25.8809	28.2988
96.94	4.24609	24.123	24.8711	24.834	25.8301	28.2344
97.04	4.24023	24.0723	24.8047	24.7832	25.7793	28.166
97.14	4.23242	24.0332	24.7383	24.7441	25.7207	28.1035
97.24	4.23242	23.9824	24.6758	24.6934	25.6699	28.0547
97.34	4.23242	23.9434	24.6133	24.6543	25.623	28.0078
97.44	4.2207	23.873	24.5488	24.5918	25.5605	27.957
97.54	4.2207	23.8223	24.5059	24.5566	25.5215	27.9023
97.64	4.2207	23.7637	24.4395	24.5	25.459	27.8262
97.74	4.2207	23.709	24.373	24.4434	25.416	27.7598
97.84	4.2207	23.6523	24.3242	24.3926	25.3516	27.6992
97.94	4.21289	23.6133	24.2793	24.3613	25.3203	27.6563
98.04	4.21289	23.5625	24.2402	24.2891	25.25	27.5977
98.14	4.20117	23.5352	24.2168	24.2637	25.1992	27.5625
98.24	4.19727	23.4805	24.1836	24.1973	25.1445	27.5098
98.34	4.19141	23.4355	24.166	24.1445	25.0801	27.4473
98.44	4.1875	23.4082	24.1289	24.1172	25.041	27.4082
98.54	4.18164	23.3633	24.0898	24.0664	24.9902	27.3457
98.64	4.17773	23.3242	24.0586	24.0273	24.9316	27.2988
98.74	4.17188	23.2852	24.0098	23.9766	24.8809	27.2363
98.84	4.16016	23.2422	23.9863	23.9141	24.8301	27.1816
98.94	4.15625	23.1953	23.9551	23.8672	24.791	27.1289
99.04	4.14063	23.1367	23.9102	23.8086	24.7324	27.082
99.14	4.14063	23.084	23.8711	23.7559	24.6719	27.0332
99.24	4.13672	23.0371	23.8516	23.709	24.6328	26.9922
99.34	4.11914	23.0078	23.8223	23.6602	24.5957	26.9434
99.44	4.11914	22.9707	23.7949	23.6309	24.5586	26.8984
99.54	4.11133	22.9336	23.7695	23.5859	24.5215	26.8477
99.64	4.11133	22.9023	23.7383	23.5352	24.4785	26.7969
99.74	4.09961	22.8516	23.6992	23.4844	24.4434	26.7422
99.84	4.0957	22.8066	23.6445	23.4258	24.3887	26.6934
99.94	4.08984	22.7656	23.5781	23.3867	24.3535	26.6387
100.04	4.08203	22.7148	23.5391	23.3359	24.3223	26.5957
100.14	4.07031	22.668	23.4805	23.2891	24.2676	26.5254
100.24	4.07031	22.6152	23.4219	23.2363	24.2109	26.4492
100.34	4.07031	22.5723	23.375	23.1738	24.1719	26.3672
100.44	4.0625	22.5254	23.3105	23.1387	24.125	26.2813
100.54	4.05078	22.4746	23.2637	23.0801	24.0664	26.2031
100.64	4.05078	22.4277	23.207	23.0254	24.0195	26.1348
100.74	4.04688	22.3828	23.1523	22.9824	23.9648	26.0449
100.84	4.0293	22.332	23.0898	22.9258	23.9277	25.957
100.94	4.0293	22.2852	23.0391	22.875	23.8809	25.8828
101.04	4.02148	22.2539	22.9883	22.8242	23.8301	25.8184
101.14	4.02148	22.2227	22.9688	22.7969	23.7988	25.7363
101.24	4.02148	22.1836	22.9102	22.7461	23.7168	25.6816
101.34	4.00977	22.1445	22.875	22.6953	23.6914	25.6367
101.44	4.02148	22.1055	22.8418	22.6563	23.6406	25.6016
101.54	4.00586	22.0352	22.7871	22.6016	23.5859	25.5586
101.64	4	21.9688	22.7266	22.541	23.5254	25.5039
101.74	4	21.9316	22.6973	22.5117	23.4883	25.4746
101.84	4	21.8867	22.6484	22.4785	23.4434	25.4102
101.94	4	21.8535	22.6133	22.4375	23.4023	25.373
102.04	3.99609	21.8027	22.5703	22.3945	23.3516	25.3398
102.14	3.98242	21.7676	22.5234	22.3594	23.3086	25.2988
102.24	3.97852	21.7207	22.4805	22.3125	23.2559	25.2441
102.34	3.97266	21.6641	22.4375	22.2637	23.1992	25.1875
102.44	3.96875	21.6289	22.3906	22.2363	23.1602	25.1406
102.54	3.95117	21.5723	22.3477	22.1855	23.1094	25.0879
102.64	3.95508	21.5371	22.3242	22.1465	23.0703	25.0371
102.74	3.96094	21.4941	22.2793	22.1035	23.0195	25.0098
102.84	3.94922	21.4434	22.2285	22.0645	22.9609	24.959
102.94	3.93164	21.4043	22.1934	22.0254	22.9219	24.9434
103.04	3.93164	21.3496	22.1406	21.9707	22.8555	24.8867
103.14	3.93164	21.293	22.0977	21.9258	22.8105	24.8262
103.24	3.93164	21.2461	22.0508	21.8867	22.7715	24.7832
103.34	3.91992	21.207	22.0078	21.8477	22.7441	24.7422
103.44	3.91992	21.1738	21.9805	21.8066	22.7031	24.709
103.54	3.91992	21.1309	21.9414	21.7637	22.6602	24.666
103.64	3.91992	21.0859	21.8887	21.7363	22.6016	24.6348
103.74	3.91602	21.043	21.8535	21.6973	22.5703	24.5977
103.84	3.91797	21.0156	21.8223	21.6582	22.5156	24.5508
103.94	3.91211	20.9648	21.791	21.6152	22.4707	24.5195
104.04	3.90039	20.9336	21.752	21.5762	22.4238	24.4688
104.14	3.89258	20.8867	21.7266	21.5371	22.3867	24.4297
104.24	3.89258	20.8359	21.6504	21.4863	22.3223	24.3789
104.34	3.88086	20.793	21.5879	21.4355	22.2793	24.3281
104.44	3.87305	20.7578	21.5371	21.3965	22.252	24.293
104.54	3.86133	20.7227	21.4648	21.3613	22.1895	24.248
104.64	3.86523	20.6719	21.4043	21.3027	22.1504	24.1973
104.74	3.87109	20.6328	21.3516	21.2637	22.1113	24.1504
104.84	3.86328	20.5781	21.2656	21.2168	22.0605	24.0879
104.94	3.85156	20.5332	21.2012	21.1621	22.0293	24.041
105.04	3.85156	20.4902	21.1348	21.127	21.9824	24
105.14	3.84766	20.4414	21.0781	21.0723	21.9395	23.957
105.24	3.83398	20.4063	21.0078	21.0371	21.9004	23.9102
105.34	3.83203	20.3711	20.9355	20.9902	21.8574	23.8555
105.44	3.83203	20.3184	20.8594	20.9414	21.8008	23.7949
105.54	3.83203	20.2734	20.8047	20.9063	21.7578	23.752
105.64	3.83203	20.2109	20.748	20.8594	21.709	23.707
105.74	3.82031	20.1719	20.7012	20.8145	21.6738	23.6484
105.84	3.8125	20.1152	20.6699	20.7793	21.6191	23.6055
105.94	3.8125	20.0801	20.6348	20.7461	21.5957	23.5625
106.04	3.8125	20.0234	20.6016	20.6836	21.5313	23.498
106.14	3.80078	19.9922	20.582	20.6602	21.5	23.4668
106.24	3.80469	19.9512	20.5547	20.6191	21.4766	23.4238
106.34	3.81055	19.9141	20.5371	20.5859	21.4316	23.3984
106.44	3.79102	19.8594	20.5195	20.543	21.3887	23.3555
106.54	3.7832	19.8223	20.5	20.4961	21.3418	23.3086
106.64	3.77148	19.7813	20.4922	20.4648	21.3223	23.2773
106.74	3.77148	19.7461	20.4609	20.4141	21.2637	23.2344
106.84	3.75977	19.7109	20.4258	20.375	21.2285	23.1973
106.94	3.75586	19.6875	20.4199	20.3359	21.1895	23.166
107.04	3.75	19.6543	20.3926	20.2969	21.1582	23.1191
107.14	3.74609	19.623	20.3613	20.2539	21.1016	23.0723
107.24	3.74414	19.6035	20.3418	20.2227	21.0703	23.0547
107.34	3.75	19.5645	20.3027	20.1758	21.0234	22.998
107.44	3.75391	19.5527	20.2715	20.1484	20.9922	22.9629
107.54	3.75977	19.5215	20.248	20.1055	20.9492	22.9219
107.64	3.75977	19.4941	20.2168	20.0664	20.9063	22.8691
107.74	3.75195	19.4629	20.1758	20.0156	20.8691	22.8184
107.84	3.74023	19.4551	20.1367	19.9766	20.834	22.7715
107.94	3.73633	19.4199	20.0918	19.9336	20.7988	22.7227
108.04	3.73047	19.4102	20.0527	19.8887	20.7422	22.6699
108.14	3.73438	19.3848	20.0176	19.8574	20.7109	22.627
108.24	3.74023	19.3535	19.9922	19.8262	20.6836	22.5879
108.34	3.74023	19.3262	19.9492	19.7715	20.6328	22.5527
108.44	3.72852	19.291	19.9043	19.7246	20.5801	22.498
108.54	3.7207	19.2988	19.8789	19.6973	20.5605	22.4668
108.64	3.7207	19.25	19.832	19.6543	20.5137	22.416
108.74	3.7207	19.2148	19.791	19.6191	20.4766	22.3691
108.84	3.70898	19.1719	19.7598	19.6055	20.4473	22.3379
108.94	3.70898	19.125	19.7129	19.5586	20.4219	22.2949
109.04	3.70898	19.0918	19.6836	19.5371	20.4063	22.2598
109.14	3.69727	19.0449	19.6484	19.5078	20.375	22.2246
109.24	3.69141	18.9902	19.6094	19.4648	20.334	22.1738
109.34	3.69141	18.9434	19.5625	19.4336	20.2969	22.1348
109.44	3.69141	18.8906	19.5234	19.3848	20.2676	22.0898
109.54	3.69141	18.8438	19.4941	19.3535	20.2422	22.0664
109.64	3.69141	18.8008	19.4688	19.334	20.2383	22.0391
109.74	3.68359	18.75	19.4258	19.2832	20.1855	21.9922
109.84	3.68945	18.7031	19.3984	19.2559	20.1602	21.9492
109.94	3.68945	18.6523	19.3555	19.2246	20.1406	21.9258
110.04	3.68164	18.5977	19.3281	19.1934	20.1133	21.8945
110.14	3.67773	18.5566	19.3047	19.168	20.082	21.8574
110.24	3.66016	18.5254	19.248	19.125	20.0508	21.8184
110.34	3.66016	18.4922	19.2324	19.1055	20.0273	21.7871
110.44	3.66016	18.4609	19.2227	19.082	20.0059	21.752
110.54	3.66406	18.4219	19.1973	19.0625	19.9883	21.7266
110.64	3.66211	18.3809	19.1602	19.0176	19.9512	21.6816
110.74	3.66211	18.3418	19.1309	18.9805	19.9141	21.6406
110.84	3.65039	18.3066	19.0938	18.9473	19.8848	21.6035
110.94	3.65039	18.2813	19.0527	18.9102	19.8633	21.5625
111.04	3.64258	18.2422	19.0195	18.877	19.8457	21.5098
111.14	3.64844	18.207	18.9766	18.8379	19.8086	21.4668
111.24	3.64063	18.1816	18.957	18.8242	19.7852	21.4355
111.34	3.64844	18.1582	18.9336	18.7773	19.752	21.4004
111.44	3.64063	18.1367	18.9102	18.7344	19.7051	21.377
111.54	3.64063	18.0977	18.8711	18.707	19.668	21.3301
111.64	3.64063	18.0703	18.8555	18.6875	19.623	21.2988
111.74	3.64063	18.0293	18.8145	18.6484	19.5879	21.2598
111.84	3.62891	17.9922	18.793	18.623	19.5391	21.2168
111.94	3.61719	17.9648	18.7598	18.584	19.5039	21.1699
112.04	3.61133	17.9453	18.7246	18.5566	19.4746	21.1504
112.14	3.61133	17.9063	18.7031	18.5176	19.4375	21.1113
112.24	3.61133	17.8809	18.6699	18.4922	19.4102	21.0781
112.34	3.61133	17.8555	18.6426	18.4551	19.375	21.0586
112.44	3.59961	17.8242	18.6211	18.4238	19.334	21.0078
112.54	3.59961	17.793	18.6074	18.4043	19.3008	20.9883
112.64	3.59961	17.7656	18.5645	18.377	19.2617	20.9492
112.74	3.5957	17.75	18.5371	18.3457	19.2305	20.9102
112.84	3.58984	17.7129	18.4688	18.3027	19.1797	20.8789
112.94	3.58984	17.6816	18.4336	18.2832	19.1641	20.8594
113.04	3.58984	17.6426	18.3652	18.2246	19.1113	20.8086
113.14	3.58984	17.623	18.332	18.2051	19.0645	20.7891
113.24	3.58203	17.5918	18.2793	18.1738	19.0234	20.7461
113.34	3.58203	17.5645	18.2246	18.1348	18.9785	20.707
113.44	3.58203	17.5332	18.1602	18.1035	18.9238	20.6758
113.54	3.57031	17.4941	18.123	18.0801	18.8848	20.6445
113.64	3.57031	17.459	18.0625	18.0508	18.832	20.6035
113.74	3.57031	17.4297	18.0137	18.0059	18.7969	20.5586
113.84	3.57031	17.4199	17.9844	17.9746	18.7676	20.543
113.94	3.5625	17.3945	17.9434	17.9434	18.7227	20.5059
114.04	3.5625	17.3516	17.8965	17.9043	18.6777	20.4668
114.14	3.5625	17.3242	17.834	17.8887	18.6348	20.4395
114.24	3.55078	17.3047	17.8008	17.8633	18.5898	20.4082
114.34	3.55078	17.2813	17.7617	17.8438	18.5391	20.3652
114.44	3.55078	17.2578	17.7441	17.8086	18.4844	20.3418
114.54	3.55078	17.2441	17.7227	17.7949	18.4512	20.3281
114.64	3.55078	17.209	17.6934	17.752	18.4121	20.2852
114.74	3.55078	17.1641	17.6797	17.7168	18.3711	20.25
114.84	3.53516	17.1445	17.6523	17.6934	18.332	20.2188
114.94	3.5293	17.1055	17.623	17.6621	18.293	20.1758
115.04	3.5293	17.0918	17.5977	17.6426	18.2598	20.1484
115.14	3.52148	17.0488	17.5625	17.6074	18.2246	20.1094
115.24	3.5293	17.0078	17.541	17.5762	18.2051	20.0703
115.34	3.5293	16.9707	17.5039	17.5391	18.1563	20.0332
115.44	3.51758	16.9453	17.4785	17.5059	18.1309	19.9922
115.54	3.51172	16.8984	17.4355	17.4707	18.0918	19.9316
115.64	3.51172	16.873	17.4336	17.4336	18.0645	19.9063
115.74	3.50781	16.8535	17.4082	17.4141	18.0508	19.8672
115.84	3.50977	16.8262	17.3691	17.375	18.0156	19.8398
115.94	3.50977	16.791	17.3379	17.3438	17.9785	19.7969
116.04	3.50586	16.7637	17.3105	17.3164	17.9551	19.7695
116.14	3.50391	16.7246	17.2676	17.2852	17.9258	19.7266
116.24	3.50195	16.7012	17.248	17.2656	17.9121	19.6992
116.34	3.50586	16.6621	17.2168	17.2266	17.8789	19.6641
116.44	3.5	16.6348	17.1855	17.1855	17.8594	19.6289
116.54	3.49219	16.6035	17.1797	17.166	17.8398	19.6094
116.64	3.49219	16.5801	17.1563	17.1426	17.8164	19.5742
116.74	3.49219	16.543	17.1074	17.0938	17.7793	19.5371
116.84	3.48828	16.5156	17.0762	17.0664	17.7441	19.498
116.94	3.48242	16.4961	17.0547	17.0469	17.7305	19.4785
117.04	3.47852	16.4492	17.0176	17.0117	17.6992	19.4355
117.14	3.4707	16.4277	16.998	16.9922	17.668	19.416
117.24	3.4707	16.4063	16.9707	16.9648	17.6523	19.3887
117.34	3.45898	16.3828	16.9512	16.9336	17.6328	19.3574
117.44	3.45898	16.3438	16.9199	16.8926	17.5898	19.3184
117.54	3.45508	16.3125	16.9004	16.8652	17.5703	19.2949
117.64	3.44922	16.2891	16.877	16.8496	17.5391	19.2656
117.74	3.45313	16.252	16.832	16.8047	17.4961	19.2285
117.84	3.45508	16.2285	16.8145	16.7773	17.4727	19.2031
117.94	3.45313	16.1914	16.7852	16.752	17.4355	19.1699
118.04	3.45898	16.1543	16.7207	16.6992	17.3945	19.1309
118.14	3.45508	16.127	16.6895	16.6738	17.3691	19.084
118.24	3.46094	16.1016	16.6777	16.6543	17.3379	19.0645
118.34	3.46094	16.0781	16.6504	16.6152	17.3105	19.0371
118.44	3.44922	16.0527	16.6074	16.584	17.2793	18.9941
118.54	3.44531	16.0332	16.5918	16.5645	17.248	18.9746
118.64	3.45117	16.0137	16.5781	16.5449	17.2246	18.9551
118.74	3.43945	15.9824	16.5508	16.5176	17.1914	18.916
118.84	3.43945	15.9414	16.5039	16.4785	17.1484	18.8711
118.94	3.43945	15.9121	16.4785	16.4473	17.1289	18.8457
119.04	3.43945	15.8848	16.4512	16.416	17.1016	18.8184
119.14	3.43555	15.8613	16.416	16.3809	17.0664	18.7715
119.24	3.42969	15.832	16.3867	16.3477	17.041	18.7441
119.34	3.42969	15.7949	16.3457	16.3047	16.9941	18.6953
119.44	3.42969	15.7715	16.3164	16.2813	16.9609	18.6758
119.54	3.42969	15.7246	16.2695	16.25	16.9355	18.6289
119.64	3.44531	15.6816	16.2266	16.2129	16.8867	18.582
119.74	3.45117	15.6191	16.1816	16.168	16.8418	18.5449
119.84	3.45117	15.5625	16.1406	16.1309	16.7988	18.5059
119.94	3.45898	15.5293	16.127	16.1211	16.75	18.4648
120.04	3.4668	15.4883	16.0898	16.0957	16.6934	18.4121
120.14	3.46484	15.4277	16.0469	16.0527	16.6309	18.3496

## Sheet: mutation-SPR
	Response (RU)
Time (s)	Trimetrexate: 1600 μM	Trimetrexate: 800 μM	Trimetrexate: 400 μM	Trimetrexate: 200 μM	Trimetrexate: 100 μM
0	0	0	0	0	0
0.24	0	0	0	0	0
0.46	0	0	0	0	0
0.69	0	0	0	0	0
0.91	0	0	0	0	0
1.13	0	0	0	0	0
1.36	0	0	0	0	0
1.59	0	0	0	0	0
1.81	0	0	0	0	0
2.03	0	0	0	0	0
2.25	0	0	0	0	0
2.48	0	0	0	0	0
2.7	0	0	0	0	0
2.92	0	0	0	0	0
3.15	0	0	0	0	0
3.38	0	0	0	0	0
3.6	0	0	0	0	0
3.83	0	0	0	0	0
4.07	0	0	0	0	0
4.29	0	0	0	0	0
4.51	0	0	0	0	0
4.74	0	0	0	0	0
4.96	0	0	0	0	0
5.18	0	0	0	0	0
5.41	0	0	0	0	0
5.63	0	0	0	0	0
5.85	0	0	0	0	0
6.07	0	0	0	0	0
6.3	0	0	0	0	0
6.52	0	0	0	0	0
6.74	0	0	0	0	0
6.97	0	0	0	0	0
7.2	0	0	0	0	0
7.42	0	0	0	0	0
7.65	0	0	0	0	0
7.88	0	0	0	0	0
8.1	0	0	0	0	0
8.32	0	0	0	0	0
8.56	0	0	0	0	0
8.77	0	0	0	0	0
8.99	0	0	0	0	0
9.22	0	0	0	0	0
9.44	0	0	0	0	0
9.67	0	0	0	0	0
9.89	0	0	0	0	0
10.11	0	0	0	0	0
10.34	0	0	0	0	0
10.57	0	0	0	0	0
10.79	0	0	0	0	0
11.01	0	0	0	0	0
11.24	0	0	0	0	0
11.47	0	0	0	0	0
11.69	0	0	0	0	0
11.91	0	0	0	0	0
12.14	0	0	0	0	0
12.36	0	0	0	0	0
12.59	0	0	0	0	0
12.81	0	0	0	0	0
13.04	0	0	0	0	0
13.26	0	0	0	0	0
13.48	0	0	0	0	0
13.71	0	0	0	0	0
13.93	0	0	0	0	0
14.15	0	0	0	0	0
14.38	0	0	0	0	0
14.6	0	0	0	0	0
14.84	0	0	0	0	0
15.07	0	0	0	0	0
15.29	0	0	0	0	0
15.51	0	0	0	0	0
15.74	0	0	0	0	0
15.97	0	0	0	0	0
16.19	0	0	0	0	0
16.41	0	0	0	0	0
16.64	0	0	0	0	0
16.87	0	0	0	0	0
17.09	0	0	0	0	0
17.34	0	0	0	0	0
17.56	0	0	0	0	0
17.79	0	0	0	0	0
18.01	0	0	0	0	0
18.23	0	0	0	0	0
18.46	0	0	0	0	0
18.68	0	0	0	0	0
18.9	0	0	0	0	0
19.13	0	0	0	0	0
19.35	0	0	0	0	0
19.58	0	0	0	0	0
19.8	0	0	0	0	0
20.03	0	0	0	0	0
20.25	0	0	0	0	0
20.48	0	0	0	0	0
20.7	0	0	0	0	0
20.93	0	0	0	0	0
21.15	0	0	0	0	0
21.38	0	0	0	0	0
21.6	0	0	0	0	0
21.82	0	0	0	0	0
22.05	0	0	0	0	0
22.27	0	0	0	0	0
22.5	0	0	0	0	0
22.73	0	0	0	0	0
22.95	0	0	0	0	0
23.17	0	0	0	0	0
23.4	0	0	0	0	0
23.62	0	0	0	0	0
23.84	0	0	0	0	0
24.07	0	0	0	0	0
24.29	0	0	0	0	0
24.52	0	0	0	0	0
24.74	0	0	0	0	0
24.96	0	0	0	0	0
25.19	0	0	0	0	0
25.41	0	0	0	0	0
25.64	0	0	0	0	0
25.86	0	0	0	0	0
26.09	0	0	0	0	0
26.31	0	0	0	0	0
26.54	0	0	0	0	0
26.76	0	0	0	0	0
26.99	0	0	0	0	0
27.21	0	0	0	0	0
27.44	0	0	0	0	0
27.66	0	0	0	0	0
27.88	0	0	0	0	0
28.11	0	0	0	0	0
28.33	0	0	0	0	0
28.55	0	0	0	0	0
28.78	0	0	0	0	0
29	0	0	0	0	0
29.22	0	0	0	0	0
29.45	0	0	0	0	0
29.67	0	0	0	0	0
29.9	0	0	0	0	0
30.14	0	0	0	0	0
30.34	0	0	0	0	0
30.57	0	0	0	0	0
30.79	0	0	0	0	0
31.02	0	0	0	0	0
31.25	0	0	0	0	0
31.47	0	0	0	0	0
31.69	0	0	0	0	0
31.92	0	0	0	0	0
32.14	0	0	0	0	0
32.37	0	0	0	0	0
32.59	0	0	0	0	0
32.82	0	0	0	0	0
33.04	0	0	0	0	0
33.26	0	0	0	0	0
33.49	0	0	0	0	0
33.71	0	0	0	0	0
33.93	0	0	0	0	0
34.16	0	0	0	0	0
34.38	0	0	0	0	0
34.61	0	0	0	0	0
34.83	0	0	0	0	0
35.05	0	0	0	0	0
35.28	0	0	0	0	0
35.5	0	0	0	0	0
35.73	0	0	0	0	0
35.95	0	0	0	0	0
36.18	0	0	0	0	0
36.4	0	0	0	0	0
36.63	0	0	0	0	0
36.85	0	0	0	0	0
37.08	0	0	0	0	0
37.3	0	0	0	0	0
37.52	0	0	0	0	0
37.75	0	0	0	0	0
37.97	0	0	0	0	0
38.2	0	0	0	0	0
38.43	0	0	0	0	0
38.65	0	0	0	0	0
38.87	0	0	0	0	0
39.1	0	0	0	0	0
39.33	0	0	0	0	0
39.55	0	0	0	0	0
39.77	0	0	0	0	0
40	0	0	0	0	0
40.22	0	0	0	0	0
40.45	0	0	0	0	0
40.67	0	0	0	0	0
40.91	0	0	0	0	0
41.12	0	0	0	0	0
41.34	0	0	0	0	0
41.56	0	0	0	0	0
41.79	0	0	0	0	0
42.01	0	0	0	0	0
42.24	0	0	0	0	0
42.46	0	0	0	0	0
42.69	0	0	0	0	0
42.91	0	0	0	0	0
43.14	0	0	0	0	0
43.36	0	0	0	0	0
43.59	0	0	0	0	0
43.8	0	0	0	0	0
44.03	0	0	0	0	0
44.26	0	0	0	0	0
44.48	0	0	0	0	0
44.7	0	0	0	0	0
44.93	0	0	0	0	0
45.15	0	0	0	0	0
45.38	0	0	0	0	0
45.6	0	0	0	0	0
45.82	0	0	0	0	0
46.05	0	0	0	0	0
46.27	0	0	0	0	0
46.5	0	0	0	0	0
46.72	0	0	0	0	0
46.95	0	0	0	0	0
47.17	0	0	0	0	0
47.39	0	0	0	0	0
47.61	0	0	0	0	0
47.84	0	0	0	0	0
48.06	0	0	0	0	0
48.29	0	0	0	0	0
48.51	0	0	0	0	0
48.74	0	0	0	0	0
48.96	0	0	0	0	0
49.18	0	0	0	0	0
49.41	0	0	0	0	0
49.63	0	0	0	0	0
49.85	0	0	0	0	0
50.08	0	0	0	0	0
50.3	0	0	0	0	0
50.52	0	0	0	0	0
50.75	0	0	0	0	0
50.97	0	0	0	0	0
51.2	0	0	0	0	0
51.43	0	0	0	0	0
51.65	0	0	0	0	0
51.88	0	0	0	0	0
52.1	0	0	0	0	0
52.33	0	0	0	0	0
52.55	0	0	0	0	0
52.78	0	0	0	0	0
53	0	0	0	0	0
53.23	0	0	0	0	0
53.45	0	0	0	0	0
53.68	0	0	0	0	0
53.9	0	0	0	0	0
54.13	0	0	0	0	0
54.35	0	0	0	0	0
54.57	0	0	0	0	0
54.8	0	0	0	0	0
55.02	0	0	0	0	0
55.25	0	0	0	0	0
55.47	0	0	0	0	0
55.69	0	0	0	0	0
55.92	0	0	0	0	0
56.14	0	0	0	0	0
56.36	0	0	0	0	0
56.59	0	0	0	0	0
56.81	0	0	0	0	0
57.04	0	0	0	0	0
57.26	0	0	0	0	0
57.49	0	0	0	0	0
57.71	0	0	0	0	0
57.94	0	0	0	0	0
58.16	0	0	0	0	0
58.39	0	0	0	0	0
58.61	0	0	0	0	0
58.83	0	0	0	0	0
59.05	0	0	0	0	0
59.28	0	0	0	0	0
59.5	0	0	0	0	0
59.73	0	0	0	0	0
59.95	0	0	0	0	0
60.18	0	0	0	0	0
60.4	0	0	0	0	0
60.63	0	0	0	0	0
60.85	0	0	0	0	0
61.07	0	0	0	0	0
61.3	0	0	0	0	0
61.52	0	0	0	0	0
61.75	0	0	0	0	0
61.97	0	0	0	0	0
62.2	0	0	0	0	0
62.42	0	0	0	0	0
62.64	0	0	0	0	0
62.87	0	0	0	0	0
63.09	0	0	0	0	0
63.31	0	0	0	0	0
63.54	0	0	0	0	0
63.76	0	0	0	0	0
63.99	0	0	0	0	0
64.21	0	0	0	0	0
64.43	0	0	0	0	0
64.66	0	0	0	0	0
64.88	0	0	0	0	0
65.11	0	0	0	0	0
65.33	0	0	0	0	0
65.55	0	0	0	0	0
65.78	0	0	0	0	0
66	0	0	0	0	0
66.23	0	0	0	0	0
66.45	0	0	0	0	0
66.68	0	0	0	0	0
66.9	0	0	0	0	0
67.12	0	0	0	0	0
67.36	0	0	0	0	0
67.58	0	0	0	0	0
67.81	0	0	0	0	0
68.03	0	0	0	0	0
68.25	0	0	0	0	0
68.48	0	0	0	0	0
68.7	0	0	0	0	0
68.93	0	0	0	0	0
69.16	0	0	0	0	0
69.38	0	0	0	0	0
69.61	0	0	0	0	0
69.83	0	0	0	0	0
70.05	0	0	0	0	0
70.28	0	0	0	0	0
70.5	0	0	0	0	0
70.73	0	0	0	0	0
70.95	0	0	0	0	0
71.18	0	0	0	0	0
71.4	0	0	0	0	0
71.62	0	0	0	0	0
71.85	0	0	0	0	0
72.07	0	0	0	0	0
72.3	0	0	0	0	0
72.52	0	0	0	0	0
72.75	0	0	0	0	0
72.97	0	0	0	0	0
73.21	0	0	0	0	0
73.42	0	0	0	0	0
73.65	0	0	0	0	0
73.87	0	0	0	0	0
74.09	0	0	0	0	0
74.31	0	0	0	0	0
74.54	0	0	0	0	0
74.76	0	0	0	0	0
74.99	0	0	0	0	0
75.21	0	0	0	0	0
75.43	0	0	0	0	0
75.66	0	0	0	0	0
75.88	0	0	0	0	0
76.11	0	0	0	0	0
76.33	0	0	0	0	0
76.56	0	0	0	0	0
76.78	0	0	0	0	0
77	0	0	0	0	0
77.23	0	0	0	0	0
77.46	0	0	0	0	0
77.68	0	0	0	0	0
77.91	0	0	0	0	0
78.13	0	0	0	0	0
78.36	0	0	0	0	0
78.58	0	0	0	0	0
78.8	0	0	0	0	0
79.03	0	0	0	0	0
79.25	0	0	0	0	0
79.48	0	0	0	0	0
79.71	0	0	0	0	0
79.93	0	0	0	0	0
80.15	0	0	0	0	0
80.37	0	0	0	0	0
80.6	0	0	0	0	0
80.82	0	0	0	0	0
81.05	0	0	0	0	0
81.27	0	0	0	0	0
81.5	0	0	0	0	0
81.72	0	0	0	0	0
81.95	0	0	0	0	0
82.18	0	0	0	0	0
82.4	0	0	0	0	0
82.62	0	0	0	0	0
82.85	0	0	0	0	0
83.08	0	0	0	0	0
83.3	0	0	0	0	0
83.53	0	0	0	0	0
83.75	0	0	0	0	0
83.98	0	0	0	0	0
84.2	0	0	0	0	0
84.42	0	0	0	0	0
84.65	0	0	0	0	0
84.87	0	0	0	0	0
85.1	0	0	0	0	0
85.32	0	0	0	0	0
85.54	0	0	0	0	0
85.77	0	0	0	0	0
85.99	0	0	0	0	0
86.22	0	0	0	0	0
86.44	0	0	0	0	0
86.66	0	0	0	0	0
86.88	0	0	0	0	0
87.11	0	0	0	0	0
87.34	0	0	0	0	0
87.56	0	0	0	0	0
87.78	0	0	0	0	0
88.01	0	0	0	0	0
88.24	0	0	0	0	0
88.46	0	0	0	0	0
88.69	0	0	0	0	0
88.91	0	0	0	0	0
89.14	0	0	0	0	0
89.36	0	0	0	0	0
89.58	0	0	0	0	0
89.81	0	0	0	0	0
90.03	0	0	0	0	0
90.25	0	0	0	0	0
90.48	0	0	0	0	0
90.71	0	0	0	0	0
90.93	0	0	0	0	0
91.16	0	0	0	0	0
91.38	0	0	0	0	0
91.6	0	0	0	0	0
91.83	0	0	0	0	0
92.05	0	0	0	0	0
92.28	0	0	0	0	0
92.5	0	0	0	0	0
92.73	0	0	0	0	0
92.95	0	0	0	0	0
93.17	0	0	0	0	0
93.41	0	0	0	0	0
93.64	0	0	0	0	0
93.86	0	0	0	0	0
94.09	0	0	0	0	0
94.31	0	0	0	0	0
94.53	0	0	0	0	0
94.76	0	0	0	0	0
94.98	0	0	0	0	0
95.2	0	0	0	0	0
95.43	0	0	0	0	0
95.65	0	0	0	0	0
95.87	0	0	0	0	0
96.1	0	0	0	0	0
96.32	0	0	0	0	0
96.55	0	0	0	0	0
96.77	0	0	0	0	0
97	0	0	0	0	0
97.22	0	0	0	0	0
97.44	0	0	0	0	0
97.67	0	0	0	0	0
97.89	0	0	0	0	0
98.12	0	0	0	0	0
98.34	0	0	0	0	0
98.57	0	0	0	0	0
98.79	0	0	0	0	0
99.02	0	0	0	0	0
99.24	0	0	0	0	0
99.47	0	0	0	0	0
99.69	0	0	0	0	0
99.91	0	0	0	0	0
100.14	0	0	0	0	0
100.36	0	0	0	0	0
100.59	0	0	0	0	0
100.83	0	0	0	0	0
101.04	0	0	0	0	0
101.28	0	0	0	0	0
101.5	0	0	0	0	0
101.73	0	0	0	0	0
101.96	0	0	0	0	0
102.18	0	0	0	0	0
102.41	0	0	0	0	0
102.63	0	0	0	0	0
102.86	0	0	0	0	0
103.08	0	0	0	0	0
103.3	0	0	0	0	0
103.53	0	0	0	0	0
103.75	0	0	0	0	0
103.97	0	0	0	0	0
104.2	0	0	0	0	0
104.42	0	0	0	0.0349584	0.0349584
104.5	0	0	0	0.0401087	0.0425829
104.5	0.0349584	0.0349584	0.0349584	0.0777984	0.0571593
104.65	0.360563	0.190095	0.0944034	0.115348	0.0716868
104.87	0.833831	0.378552	0.181245	0.154457	0.0855372
105.1	1.32322	0.574227	0.271597	0.193414	0.0999698
105.32	1.78622	0.760114	0.357606	0.230536	0.11373
105.55	2.26499	0.95312	0.447092	0.269198	0.128068
105.77	2.71795	1.13647	0.532276	0.30604	0.141738
105.99	3.16607	1.32685	0.620903	0.34441	0.155982
106.22	3.62946	1.5077	0.705271	0.380974	0.170179
106.44	4.06787	1.68734	0.789241	0.419054	0.183714
106.66	4.5016	1.87386	0.876607	0.455341	0.197818
106.89	4.9501	2.05105	0.959772	0.493133	0.211264
107.11	5.37443	2.23502	1.0463	0.529146	0.225276
107.33	5.79422	2.4098	1.12867	0.566653	0.238634
107.56	6.22832	2.59126	1.21437	0.602394	0.25195
107.78	6.63901	2.76365	1.29594	0.638002	0.265825
108	7.04532	2.94264	1.38082	0.675088	0.279654
108.23	7.46547	3.11268	1.46162	0.71203	0.292839
108.45	7.86297	3.28158	1.54203	0.747232	0.305981
108.68	8.274	3.45695	1.6257	0.783895	0.319676
108.9	8.66288	3.62355	1.70535	0.818832	0.333324
109.13	9.065	3.79652	1.78821	0.855218	0.346337
109.35	9.44544	3.96085	1.86709	0.88989	0.359896
109.58	9.83883	4.12407	1.94916	0.926001	0.372824
109.8	10.211	4.29355	2.02729	0.960411	0.386294
110.03	10.5959	4.45455	2.10857	0.996249	0.39972
110.25	10.96	4.61447	2.18595	1.03195	0.41252
110.47	11.3202	4.78051	2.26296	1.06597	0.425858
110.7	11.6927	4.93825	2.34309	1.1014	0.438574
110.92	12.0451	5.10203	2.41936	1.13516	0.451824
111.14	12.3938	5.25762	2.49872	1.16879	0.464457
111.37	12.7543	5.41217	2.57426	1.20383	0.477621
111.6	13.1108	5.57263	2.65286	1.23872	0.490741
111.82	13.4481	5.72507	2.72767	1.27197	0.50325
112.04	13.7818	5.87649	2.80552	1.30661	0.515718
112.26	14.112	6.03371	2.87962	1.34111	0.52871
112.49	14.4534	6.18983	2.95337	1.37547	0.541659
112.71	14.7763	6.33813	3.0301	1.40822	0.554005
112.94	15.1103	6.49212	3.10315	1.44084	0.56631
113.16	15.4263	6.63841	3.17915	1.47482	0.579133
113.39	15.753	6.78372	3.25149	1.5072	0.591913
113.61	16.0621	6.93459	3.32676	1.53946	0.604098
113.84	16.3818	7.07791	3.39841	1.57306	0.616794
114.06	16.6842	7.22673	3.46973	1.60652	0.628899
114.29	16.9969	7.3681	3.54393	1.63841	0.641512
114.51	17.2927	7.51488	3.61456	1.67019	0.653538
114.74	17.5987	7.65432	3.68804	1.70328	0.666069
114.96	17.8881	7.79283	3.758	1.73481	0.678016
115.18	18.1744	7.93664	3.83078	1.76765	0.690465
115.41	18.4705	8.08564	3.90006	1.79895	0.702333
115.64	18.7633	8.21512	3.97214	1.83154	0.714701
115.86	19.0404	8.34987	4.04076	1.8626	0.726492
116.08	19.3144	8.48979	4.11215	1.89495	0.738779
116.31	19.5978	8.62271	4.18011	1.92717	0.750493
116.53	19.8659	8.75473	4.25082	1.95787	0.762699
116.76	20.1432	8.89182	4.31813	1.98846	0.774865
116.98	20.4055	9.02205	4.38816	2.02032	0.786989
117.2	20.665	9.15726	4.45482	2.05206	0.798549
117.43	20.9333	9.28571	4.52117	2.0823	0.810595
117.65	21.1872	9.4133	4.59021	2.11243	0.822079
117.88	21.4497	9.54578	4.65592	2.14381	0.834045
118.1	21.698	9.67733	4.72429	2.17371	0.845454
118.32	21.9438	9.80231	4.78937	2.20486	0.857343
118.55	22.1978	9.92644	4.85709	2.23453	0.868677
118.77	22.4382	10.0497	4.92155	2.2641	0.879975
119	22.6868	10.1778	4.9857	2.29489	0.891748
119.22	22.922	10.3049	5.05246	2.32557	0.903481
119.45	23.1652	10.4257	5.116	2.3548	0.914668
119.67	23.3952	10.5511	5.18211	2.38524	0.926325
119.89	23.6228	10.6702	5.24504	2.41425	0.937942
120.12	23.8582	10.7885	5.31052	2.44446	0.949018
120.35	24.091	10.9114	5.37567	2.47325	0.960059
120.57	24.3111	11.0281	5.43769	2.50323	0.971564
120.8	24.5388	11.144	5.50222	2.5318	0.982532
121.02	24.7543	11.2644	5.56365	2.56027	0.993962
121.25	24.977	11.3787	5.62479	2.58992	1.00486
121.47	25.1878	11.4975	5.69116	2.61945	1.01621
121.69	25.3963	11.6103	5.75444	2.64759	1.02753
121.92	25.6119	11.7223	5.81742	2.6769	1.03832
122.14	25.8158	11.8386	5.87736	2.70483	1.04907
122.37	26.0268	11.9491	5.93973	2.73392	1.06028
122.59	26.2263	12.0639	5.99911	2.76289	1.07097
122.81	26.4237	12.1828	6.0582	2.7905	1.0821
123.04	26.6279	12.291	6.11968	2.81801	1.0932
123.26	26.821	12.4033	6.17821	2.84666	1.10377
123.49	27.0208	12.51	6.2391	2.87396	1.1148
123.71	27.2097	12.6161	6.29706	2.9024	1.12531
123.93	27.3966	12.7261	6.35476	2.93072	1.13626
124.16	27.5899	12.8307	6.41478	2.95893	1.1467
124.38	27.7728	12.9346	6.47192	2.98704	1.15758
124.6	27.9538	13.0424	6.53137	3.01382	1.16842
124.84	28.1489	13.1449	6.58796	3.0405	1.17876
125.07	28.3339	13.2466	6.64684	3.06829	1.18953
125.29	28.5088	13.3523	6.70289	3.09477	1.1998
125.52	28.6897	13.4527	6.75867	3.12235	1.21004
125.74	28.8609	13.5569	6.81671	3.14863	1.22071
125.96	29.0302	13.6559	6.87197	3.176	1.23134
126.19	29.2053	13.7543	6.92945	3.20208	1.24148
126.42	29.3784	13.8564	6.98417	3.22924	1.25204
126.64	29.5422	13.9534	7.0411	3.25513	1.26211
126.86	29.7043	14.0497	7.0953	3.28091	1.27215
127.08	29.8646	14.1498	7.15169	3.30777	1.28261
127.31	30.0304	14.2491	7.2078	3.33337	1.29258
127.53	30.1873	14.3435	7.26121	3.36002	1.30342
127.78	30.3635	14.4373	7.31437	3.38542	1.31378
128	30.5168	14.5346	7.36968	3.41188	1.32365
128.22	30.6685	14.6271	7.42233	3.43708	1.33394
128.45	30.8253	14.7231	7.47711	3.46334	1.34375
128.67	30.9737	14.8143	7.52926	3.48836	1.35397
128.89	31.1205	14.9049	7.58351	3.51441	1.36371
129.12	31.2723	14.9989	7.63516	3.54037	1.37386
129.34	31.4159	15.0883	7.6889	3.5651	1.38355
129.56	31.558	15.1811	7.74005	3.58974	1.39363
129.78	31.6985	15.2692	7.79096	3.6154	1.40325
130.01	31.8439	15.3568	7.84163	3.63986	1.41327
130.23	31.9814	15.4477	7.89435	3.66533	1.42282
130.46	32.1236	15.5379	7.94454	3.6896	1.43278
130.68	32.2581	15.6237	7.99675	3.71488	1.44227
130.91	32.3972	15.7089	8.04646	3.74005	1.45216
131.13	32.5289	15.7935	8.09817	3.76405	1.46202
131.35	32.6591	15.8813	8.1474	3.78795	1.47142
131.59	32.7995	15.9648	8.1964	3.81285	1.48078
131.81	32.9269	16.0514	8.24738	3.83657	1.49055
132.03	33.0528	16.1338	8.2981	3.86128	1.50027
132.26	33.1831	16.2192	8.34639	3.88483	1.50955
132.48	33.3063	16.3004	8.39445	3.90935	1.51921
132.71	33.4337	16.3811	8.44229	3.93271	1.52843
132.93	33.5543	16.4648	8.4899	3.95705	1.53803
133.16	33.679	16.5444	8.53944	3.98024	1.54719
133.37	33.7916	16.6234	8.58659	4.00439	1.55672
133.6	33.9136	16.7054	8.63565	4.02845	1.56623
133.83	34.0343	16.7834	8.68235	4.05138	1.5753
134.05	34.1484	16.8608	8.73094	4.07422	1.58433
134.28	34.2665	16.9412	8.7772	4.09801	1.59375
134.5	34.3782	17.0175	8.82532	4.12067	1.60313
134.73	34.4936	17.0968	8.87114	4.14428	1.61207
134.95	34.6029	17.1722	8.9188	4.16678	1.6214
135.18	34.7159	17.247	8.96417	4.19021	1.63028
135.4	34.8228	17.3247	9.00933	4.21254	1.63954
135.63	34.9333	17.3984	9.05428	4.23579	1.64837
135.85	35.0379	17.4751	9.10104	4.25795	1.65757
136.07	35.1413	17.5479	9.14757	4.28103	1.66635
136.3	35.2483	17.6202	9.19187	4.30402	1.67549
136.52	35.3495	17.6952	9.23796	4.32592	1.6842
136.75	35.4542	17.7666	9.28183	4.34775	1.69328
136.97	35.5532	17.8406	9.32747	4.37048	1.70194
137.19	35.6511	17.9109	9.37093	4.39214	1.71096
137.42	35.7524	17.984	9.41613	4.41469	1.71995
137.64	35.8483	18.0534	9.45917	4.43619	1.72852
137.86	35.9431	18.1254	9.50394	4.45858	1.73745
138.09	36.0411	18.1939	9.54656	4.48088	1.74597
138.31	36.1339	18.2649	9.58899	4.50117	1.75484
138.54	36.2298	18.3324	9.63312	4.5233	1.7633
138.77	36.3246	18.4025	9.67514	4.54535	1.77212
138.99	36.4144	18.4691	9.71885	4.56637	1.78052
139.21	36.5031	18.5352	9.76046	4.58825	1.7889
139.44	36.5949	18.6009	9.80188	4.6091	1.79763
139.66	36.6818	18.6691	9.84497	4.63082	1.80595
139.88	36.7677	18.7339	9.88599	4.65152	1.81463
140.11	36.8565	18.8012	9.92867	4.67307	1.8229
140.33	36.9406	18.8651	9.96929	4.69361	1.83151
140.56	37.0275	18.9286	10.0116	4.715	1.83973
140.78	37.1098	18.9945	10.0518	4.73539	1.84829
141.01	37.1948	19.06	10.0937	4.75662	1.85682
141.23	37.2752	19.1222	10.1335	4.77685	1.86495
141.45	37.3548	19.1868	10.1732	4.79792	1.87343
141.68	37.4371	19.2481	10.2144	4.81891	1.88151
141.9	37.515	19.3118	10.2555	4.83981	1.88993
142.12	37.592	19.3723	10.2928	4.85974	1.89795
142.35	37.6717	19.4378	10.3335	4.88049	1.90632
142.57	37.7471	19.4975	10.374	4.90026	1.91465
142.8	37.825	19.5594	10.4125	4.92085	1.9226
143.02	37.8987	19.6183	10.4509	4.94047	1.93088
143.25	37.975	19.6794	10.4908	4.96091	1.93878
143.47	38.0471	19.7374	10.5288	4.98127	1.94701
143.69	38.1185	19.7977	10.5683	5.00154	1.95485
143.92	38.1923	19.8549	10.6059	5.02087	1.96303
144.14	38.2621	19.9118	10.645	5.04099	1.97082
144.37	38.3343	19.9708	10.6823	5.06017	1.97894
144.59	38.4026	20.0269	10.7211	5.08014	1.98668
144.82	38.4732	20.0826	10.758	5.09918	1.9944
145.05	38.543	20.1405	10.7964	5.119	2.00244
145.27	38.6091	20.1979	10.8329	5.13874	2.01046
145.49	38.6745	20.2525	10.8709	5.15756	2.0181
145.72	38.7421	20.3091	10.9071	5.17716	2.02606
145.94	38.806	20.363	10.9448	5.19583	2.03365
146.17	38.8721	20.4189	10.9823	5.21528	2.04156
146.39	38.9347	20.4719	11.0179	5.23465	2.04945
146.62	38.9994	20.5247	11.0534	5.25311	2.05697
146.84	39.0606	20.5794	11.092	5.2715	2.0648
147.07	39.1239	20.6338	11.1287	5.29066	2.07227
147.29	39.1838	20.6831	11.1637	5.30891	2.08005
147.51	39.243	20.7344	11.2001	5.32792	2.08746
147.74	39.3043	20.7877	11.2348	5.34604	2.0952
147.96	39.3622	20.8384	11.2693	5.36491	2.10257
148.19	39.4222	20.8909	11.3052	5.38289	2.11025
148.41	39.4789	20.9409	11.3409	5.4008	2.1179
148.63	39.535	20.9927	11.3749	5.41945	2.1252
148.86	39.593	21.0419	11.4087	5.43804	2.1328
149.09	39.6503	21.0909	11.4424	5.45574	2.14005
149.31	39.7046	21.1417	11.4774	5.47339	2.1476
149.53	39.7583	21.1921	11.5122	5.49176	2.15513
149.76	39.8138	21.24	11.5454	5.51006	2.16231
150.03	39.8782	21.2876	11.5785	5.5275	2.16979
150.2	39.9183	21.337	11.6113	5.54567	2.17725
150.43	39.972	21.384	11.6455	5.56298	2.18435
150.65	40.0228	21.4327	11.6796	5.58022	2.19144
150.88	40.0754	21.479	11.712	5.59818	2.19882
151.1	40.1251	21.5271	11.7442	5.61608	2.20618
151.32	40.1743	21.5728	11.7763	5.63312	2.21319
151.55	40.2252	21.6202	11.8097	5.65088	2.2205
151.77	40.2733	21.6653	11.8415	5.66857	2.22779
152	40.3231	21.712	11.8746	5.68542	2.23505
152.22	40.3702	21.7565	11.9075	5.70222	2.24197
152.45	40.4189	21.8026	11.9388	5.7197	2.24918
152.67	40.465	21.8465	11.97	5.73637	2.25637
152.9	40.5126	21.89	12.0024	5.75373	2.26322
153.11	40.5556	21.9352	12.0333	5.77026	2.27037
153.34	40.6023	21.9781	12.064	5.78749	2.27748
153.57	40.6484	22.0247	12.096	5.8039	2.28427
153.79	40.692	22.067	12.1264	5.821	2.29134
154.01	40.7351	22.111	12.1581	5.83803	2.29839
154.24	40.7798	22.1527	12.1883	5.85426	2.30511
154.46	40.822	22.1942	12.2183	5.87116	2.31211
154.69	40.8656	22.2373	12.2495	5.88726	2.31909
154.92	40.9088	22.2782	12.2792	5.90331	2.32574
155.14	40.9497	22.3207	12.3088	5.92002	2.33268
155.36	40.9901	22.3611	12.3396	5.93666	2.33928
155.59	41.0318	22.4012	12.3689	5.95252	2.34617
155.81	41.0714	22.4428	12.398	5.96904	2.35274
156.03	41.1105	22.4824	12.4284	5.98479	2.35958
156.26	41.1509	22.5216	12.4572	6.00047	2.3661
156.48	41.1892	22.5624	12.486	6.01681	2.3729
156.71	41.2288	22.6012	12.5146	6.03237	2.37938
156.93	41.2662	22.6414	12.5444	6.04858	2.38613
157.15	41.3032	22.6796	12.5727	6.06473	2.39287
157.38	41.3415	22.7176	12.6034	6.08012	2.39928
157.6	41.3777	22.7587	12.6328	6.09614	2.40597
157.82	41.4136	22.7978	12.6607	6.11142	2.41263
158.05	41.4506	22.835	12.6897	6.12663	2.41899
158.27	41.4857	22.8736	12.7174	6.14248	2.42561
158.5	41.522	22.9103	12.7474	6.15758	2.43192
158.72	41.5563	22.9467	12.7748	6.1733	2.4385
158.94	41.5902	22.9845	12.8033	6.18829	2.44477
159.17	41.6253	23.0221	12.8304	6.2039	2.4513
159.39	41.6585	23.0577	12.8586	6.21945	2.45753
159.61	41.6914	23.0932	12.8855	6.23426	2.46402
159.84	41.7253	23.1284	12.9122	6.24902	2.47021
160.07	41.7589	23.1649	12.94	6.26439	2.47666
160.29	41.7907	23.1996	12.9665	6.27904	2.48281
160.52	41.8236	23.2357	12.9928	6.2943	2.48921
160.76	41.8575	23.2699	13.0202	6.30884	2.4956
160.97	41.8868	23.3055	13.0463	6.32398	2.50169
161.19	41.9172	23.3408	13.0735	6.33841	2.50803
161.41	41.9473	23.3743	13.0993	6.35278	2.51435
161.63	41.9771	23.4076	13.1262	6.36775	2.52038
161.87	42.0092	23.4437	13.1518	6.38202	2.52666
162.09	42.0383	23.4766	13.1773	6.39688	2.53265
162.32	42.0684	23.5107	13.2038	6.41104	2.53889
162.55	42.0981	23.5431	13.2291	6.42578	2.54511
162.77	42.1263	23.5753	13.2553	6.44047	2.55104
162.99	42.1542	23.6072	13.2803	6.45447	2.55722
163.21	42.1817	23.6404	13.3052	6.46841	2.56337
163.44	42.2102	23.672	13.3311	6.48294	2.56924
163.66	42.2372	23.7047	13.3557	6.49678	2.57536
163.91	42.2675	23.7358	13.3813	6.51119	2.58119
164.13	42.2938	23.7667	13.4057	6.52493	2.58727
164.35	42.3199	23.8099	13.4311	6.53923	2.59333
164.58	42.3469	23.8306	13.4553	6.55348	2.5991
164.8	42.3724	23.8609	13.4793	6.56706	2.60564
165.02	42.3976	23.8909	13.5044	6.58059	2.61138
165.24	42.4226	23.9208	13.5282	6.59468	2.61735
165.47	42.4484	23.9518	13.553	6.6081	2.62305
165.69	42.4728	23.9813	13.5798	6.62209	2.62899
165.92	42.4981	24.0118	13.6032	6.63541	2.63465
166.15	42.5231	24.0409	13.6266	6.64929	2.64055
166.37	42.5467	24.071	13.6509	6.66251	2.64617
166.59	42.5701	24.0997	13.674	6.67629	2.65203
166.82	42.5942	24.1282	13.6981	6.68941	2.65762
167.05	42.6181	24.1564	13.7231	6.70308	2.66344
167.27	42.6408	24.1858	13.7459	6.7161	2.66899
167.49	42.6631	24.2137	13.7686	6.72967	2.67477
167.72	42.6863	24.2426	13.7911	6.74318	2.68054
167.94	42.7082	24.2701	13.8146	6.75606	2.68603
168.16	42.7298	24.2987	13.837	6.76947	2.69176
168.39	42.7522	24.327	13.8593	6.78225	2.69722
168.61	42.7734	24.354	13.8824	6.79498	2.70316
168.84	42.7953	24.3807	13.9045	6.80824	2.70932
169.06	42.816	24.4085	13.9274	6.82088	2.71496
169.29	42.8374	24.4349	13.9492	6.83461	2.72035
169.51	42.8577	24.4623	13.972	6.84715	2.72596
169.73	42.8778	24.4883	13.9936	6.8602	2.73228
169.95	42.8976	24.5142	14.0151	6.87265	2.73785
170.18	42.9181	24.5399	14.0375	6.88504	2.74389
170.4	42.9376	24.5666	14.0588	6.89796	2.74966
170.63	42.9576	24.5919	14.081	6.91026	2.75541
170.85	42.9766	24.6171	14.1021	6.92307	2.76115
171.07	42.9954	24.6432	14.1241	6.93528	2.76662
171.3	43.0149	24.668	14.145	6.948	2.77208
171.52	43.0332	24.6938	14.1658	6.96012	2.77775
171.75	43.0523	24.7183	14.1874	6.97274	2.78364
171.97	43.0702	24.7437	14.209	6.98477	2.78928
172.19	43.088	24.7678	14.2295	6.99729	2.79442
172.42	43.1064	24.7929	14.2508	7.00923	2.80002
172.64	43.1238	24.8167	14.2712	7.0222	2.8056
172.87	43.1418	24.8404	14.2914	7.03458	2.81185
173.09	43.1589	24.865	14.3124	7.04638	2.81692
173.32	43.1765	24.8883	14.3324	7.05867	2.82221
173.54	43.1931	24.9115	14.3524	7.07037	2.82725
173.76	43.2096	24.9356	14.3731	7.08257	2.83251
173.99	43.2267	24.9584	14.3928	7.09419	2.83774
174.21	43.2428	24.9822	14.4134	7.10629	2.84273
174.43	43.2587	25.0047	14.4338	7.11782	2.84794
174.66	43.2752	25.0271	14.4533	7.12983	2.85289
174.88	43.2908	25.0494	14.4726	7.1418	2.85806
175.11	43.307	25.0725	14.4928	7.1532	2.86321
175.33	43.3222	25.0944	14.512	7.16456	2.86812
175.55	43.3374	25.1172	14.5319	7.17639	2.87324
175.78	43.353	25.1389	14.5518	7.18766	2.87834
176	43.3678	25.1614	14.5707	7.1994	2.8832
176.23	43.383	25.1827	14.5895	7.21059	2.88827
176.45	43.3975	25.2039	14.6091	7.22224	2.8931
176.68	43.4124	25.226	14.6277	7.23334	2.89813
176.9	43.4266	25.2469	14.6471	7.24541	2.90315
177.12	43.4406	25.2686	14.6655	7.25693	2.90793
177.35	43.455	25.2892	14.6839	7.2679	2.91291
177.57	43.4687	25.3097	14.703	7.27884	2.91788
177.8	43.4829	25.331	14.7212	7.29022	2.92262
178.03	43.4969	25.3513	14.7393	7.30107	2.92755
178.25	43.5101	25.3722	14.7581	7.31189	2.93247
178.47	43.5232	25.3922	14.7761	7.32315	2.93716
178.7	43.5368	25.412	14.7939	7.33436	2.94204
178.92	43.5496	25.4326	14.8125	7.34505	2.9467
179.14	43.5623	25.4521	14.8309	7.35618	2.95155
179.37	43.5754	25.4715	14.8485	7.36679	2.95639
179.59	43.5878	25.4917	14.8668	7.37784	2.961
179.82	43.6006	25.5117	14.8842	7.38884	2.96581
180.04	43.6128	25.5307	14.9016	7.39933	2.97039
180.27	43.6253	25.5496	14.9196	7.40978	2.97517
180.49	43.6372	25.5683	14.9368	7.42066	2.97992
180.72	43.6495	25.5878	14.9547	7.43103	2.98467
180.94	43.6611	25.6063	14.9717	7.44182	2.98919
181.17	43.6731	25.6255	14.9886	7.45258	2.9939
181.39	43.6845	25.6438	15.0062	7.46283	2.99839
181.61	43.6957	25.6619	15.023	7.47304	3.00307
181.84	43.7073	25.6807	15.0397	7.48368	3.00774
182.06	43.7183	25.6986	15.057	7.49382	3.01218
182.29	43.7297	25.7172	15.0735	7.50437	3.01662
182.51	43.7405	25.7348	15.0907	7.51489	3.02104
182.86	43.7573	25.7531	15.1078	7.52491	3.02544
182.99	43.7635	25.7705	15.1241	7.53489	3.02983
183.2	43.7735	25.7886	15.1403	7.54574	3.03441
183.43	43.7842	25.8057	15.1572	7.55609	3.03857
183.66	43.7949	25.8236	15.1733	7.56596	3.04292
183.88	43.8049	25.8405	15.19	7.57624	3.04726
184.11	43.8153	25.8573	15.2059	7.58603	3.05158
184.33	43.8252	25.8747	15.2224	7.59623	3.05588
184.56	43.8354	25.8913	15.2382	7.60595	3.06018
184.78	43.845	25.9085	15.2538	7.61607	3.06426
185.04	43.8563	25.9256	15.2701	7.62571	3.06834
185.29	43.8669	25.9419	15.2857	7.63576	3.07259
185.54	43.8775	25.9587	15.3018	7.64533	3.07683
185.78	43.8875	25.9748	15.3172	7.6553	3.08106
186.02	43.8974	25.9907	15.3332	7.6648	3.08508
186.24	43.9064	26.0072	15.3484	7.67469	3.08947
186.47	43.9157	26.0229	15.3643	7.68412	3.09346
186.7	43.9248	26.0385	15.3793	7.69394	3.09764
186.93	43.9339	26.0547	15.3944	7.7033	3.1018
187.17	43.9433	26.0701	15.41	7.71262	3.10575
187.39	43.9517	26.0853	15.4248	7.72233	3.10989
187.62	43.9605	26.1012	15.4403	7.73158	3.11401
187.85	43.9692	26.1169	15.4557	7.74122	3.11812
188.08	43.9778	26.1319	15.4704	7.75082	3.1224
188.3	43.9859	26.1474	15.4849	7.75996	3.12666
188.52	43.9939	26.1629	15.5001	7.76908	3.13073
188.74	44.0019	26.1775	15.5146	7.77857	3.13496
189	44.0111	26.1927	15.5289	7.78761	3.13919
189.22	44.0189	26.2072	15.5439	7.79703	3.1434
189.44	44.0266	26.2215	15.5581	7.806	3.14741
189.66	44.0342	26.2358	15.5723	7.81535	3.15159
189.88	44.0417	26.2506	15.587	7.82426	3.15576
190.11	44.0494	26.2647	15.6011	7.83354	3.15973
190.35	44.0575	26.2793	15.6157	7.84278	3.16405
190.57	44.0647	26.2932	15.6296	7.85119	3.16818
190.8	44.0722	26.3076	15.6434	7.86036	3.17229
191.03	44.0797	26.3212	15.6578	7.8691	3.17621
191.26	44.087	26.3355	15.6715	7.8782	3.1803
191.48	44.094	26.349	15.6858	7.88688	3.18419
191.7	44.1008	26.3624	15.6993	7.89591	3.18825
191.93	44.1079	26.3763	15.7135	7.90491	3.1923
192.15	44.1147	26.3895	15.7269	7.91349	3.19615
192.37	44.1213	26.4027	15.7409	7.92203	3.20017
192.6	44.1282	26.4163	15.7542	7.93093	3.20418
192.82	44.1347	26.4293	15.7686	7.93941	3.20817
193.05	44.1415	26.4421	15.7812	7.94824	3.21197
193.27	44.1478	26.4555	15.7949	7.95666	3.21594
193.49	44.1541	26.4688	15.808	7.96542	3.21989
193.72	44.1606	26.4814	15.8216	7.97378	3.22366
193.94	44.1668	26.4939	15.8345	7.98247	3.22759
194.17	44.1732	26.5069	15.8474	7.99076	3.2315
194.4	44.1795	26.5192	15.8608	7.9994	3.23523
194.62	44.1854	26.5321	15.8741	8.00799	3.23912
194.84	44.1913	26.5443	15.8868	8.01656	3.24299
195.06	44.1972	26.5564	15.8994	8.02472	3.24669
195.29	44.2032	26.5689	15.9126	8.03286	3.25054
195.52	44.2092	26.5809	15.9251	8.04133	3.25437
195.74	44.2148	26.5932	15.9381	8.0494	3.25803
195.97	44.2207	26.605	15.9505	8.0578	3.26168
196.19	44.2262	26.6167	15.9628	8.06581	3.26548
196.42	44.2319	26.6289	15.9756	8.07416	3.26926
196.64	44.2373	26.6404	15.9878	8.08211	3.27287
196.87	44.2429	26.6519	16	8.09038	3.27663
197.09	44.2482	26.6638	16.0126	8.09863	3.28038
197.31	44.2534	26.6751	16.0252	8.10649	3.28396
197.54	44.2588	26.6868	16.0372	8.11432	3.28768
197.76	44.2639	26.6989	16.0496	8.12248	3.2914
197.99	44.2692	26.7095	16.0615	8.13025	3.29493
198.21	44.2742	26.7205	16.0738	8.13799	3.29862
198.43	44.2792	26.7314	16.0856	8.14605	3.3023
198.66	44.2843	26.7423	16.0978	8.15373	3.30596
198.89	44.2894	26.7535	16.1094	8.16174	3.30945
199.11	44.2942	26.7642	16.121	8.16936	3.31309
199.33	44.2989	26.7754	16.1331	8.17696	3.31672
199.57	44.304	26.7859	16.1451	8.18487	3.32018
199.8	44.3089	26.7969	16.1565	8.19275	3.32378
200.02	44.3135	26.8073	16.1678	8.20026	3.32737
200.25	44.3182	26.8181	16.1796	8.20809	3.33095
200.47	44.3227	26.8284	16.1909	8.21588	3.33436
200.7	44.3273	26.839	16.2026	8.2233	3.33792
200.92	44.3317	26.8492	16.2142	8.2307	3.34146
201.15	44.3362	26.8592	16.2253	8.2384	3.345
201.37	44.3405	26.8697	16.2364	8.24608	3.34836
201.59	44.3448	26.8796	16.2474	8.25372	3.35187
201.82	44.3492	26.8894	16.2588	8.26134	3.35522
202.04	44.3533	26.8997	16.2702	8.26892	3.3587
202.27	44.3576	26.9094	16.281	8.27615	3.36218
202.49	44.3617	26.9195	16.2917	8.28368	3.36564
202.72	44.3659	26.9291	16.3025	8.29086	3.36894
202.95	44.37	26.939	16.3136	8.29833	3.37238
203.17	44.374	26.9485	16.3247	8.30545	3.37581
203.39	44.3779	26.9583	16.3353	8.31286	3.37908
203.62	44.3819	26.9677	16.3468	8.31993	3.38249
203.84	44.3857	26.9769	16.3563	8.32729	3.38588
204.06	44.3895	26.9866	16.3672	8.33462	3.38912
204.29	44.3934	26.9957	16.3775	8.3416	3.39249
204.51	44.397	27.0052	16.3883	8.34856	3.39585
204.74	44.4008	27.0142	16.3986	8.35581	3.3992
204.96	44.4044	27.0236	16.4093	8.36303	3.40239
205.19	44.4082	27.0325	16.4195	8.36991	3.40572
205.42	44.4119	27.0417	16.43	8.37677	3.4089
205.64	44.4153	27.0505	16.4401	8.3839	3.4122
205.86	44.4188	27.0592	16.4501	8.39102	3.4155
206.09	44.4224	27.0682	16.4606	8.39779	3.41878
206.31	44.4257	27.0768	16.4705	8.40454	3.42206
206.54	44.4292	27.0854	16.4804	8.41158	3.42518
206.76	44.4325	27.0942	16.4907	8.41858	3.42843
206.99	44.4359	27.1027	16.5005	8.42525	3.43167
207.21	44.4392	27.1114	16.5106	8.4319	3.43476
207.44	44.4425	27.1197	16.5203	8.43853	3.43798
207.66	44.4457	27.1283	16.53	8.44543	3.44105
207.9	44.4491	27.1365	16.5396	8.452	3.44425
208.12	44.4522	27.1447	16.55	8.45885	3.44743
208.35	44.4553	27.1531	16.5595	8.46538	3.45047
208.57	44.4584	27.1611	16.569	8.47217	3.45364
208.79	44.4614	27.1695	16.5784	8.47865	3.45666
209.02	44.4644	27.1774	16.5891	8.4854	3.45981
209.25	44.4675	27.1856	16.5997	8.49182	3.46281
209.47	44.4704	27.1934	16.6098	8.49852	3.46593
209.7	44.4734	27.2012	16.6198	8.5049	3.46905
209.92	44.4762	27.2092	16.6294	8.51154	3.47202
210.15	44.4791	27.2169	16.639	8.51787	3.47511
210.37	44.4819	27.2248	16.6493	8.52446	3.4782
210.6	44.4848	27.2324	16.6584	8.53074	3.48114
210.82	44.4875	27.2399	16.6678	8.537	3.4842
211.05	44.4903	27.2473	16.6767	8.54352	3.48726
211.27	44.4929	27.2551	16.6877	8.55002	3.49017
211.49	44.4956	27.2624	16.6969	8.5562	3.4932
211.72	44.4983	27.27	16.7057	8.56265	3.4961
211.94	44.5008	27.2773	16.7145	8.56879	3.49911
212.17	44.5035	27.2848	16.7248	8.57519	3.50212
212.39	44.506	27.2919	16.7335	8.58128	3.50511
212.62	44.5086	27.2994	16.743	8.58763	3.50796
212.84	44.511	27.3067	16.7516	8.59368	3.51094
213.07	44.5136	27.3137	16.7605	8.5997	3.51377
213.29	44.516	27.321	16.769	8.60598	3.51686
213.53	44.5186	27.3279	16.7775	8.61196	3.51968
213.76	44.521	27.3351	16.7863	8.61819	3.52261
213.98	44.5233	27.3419	16.7947	8.6244	3.52566
214.2	44.5256	27.3489	16.8031	8.63031	3.52845
214.43	44.528	27.3557	16.8118	8.63647	3.53136
214.65	44.5303	27.3623	16.8201	8.64233	3.53413
214.88	44.5326	27.3693	16.8305	8.64845	3.53714
215.1	44.5348	27.3758	16.8387	8.65427	3.54002
215.33	44.5371	27.3827	16.8473	8.66007	3.54289
215.55	44.5392	27.3892	16.8554	8.66664	3.54574
215.78	44.5414	27.3959	16.8634	8.67239	3.54847
216	44.5435	27.4023	16.8726	8.67839	3.55131
216.23	44.5457	27.409	16.882	8.68436	3.55401
216.45	44.5478	27.4153	16.8911	8.69005	3.55683
216.68	44.5499	27.4216	16.9	8.69572	3.55952
216.9	44.5519	27.4281	16.9079	8.70163	3.56233
217.13	44.554	27.4343	16.9168	8.70725	3.56512
217.35	44.556	27.4407	16.926	8.71311	3.56778
217.57	44.5579	27.4468	16.9337	8.71895	3.57056
217.8	44.5599	27.4528	16.9414	8.72451	3.57332
218.02	44.5618	27.4591	16.9495	8.73031	3.57596
218.25	44.5638	27.4651	16.9574	8.73583	3.5787
218.47	44.5657	27.4713	16.965	8.74133	3.58144
218.7	44.5676	27.4772	16.9726	8.74706	3.58405
218.92	44.5694	27.4831	16.9805	8.75276	3.58677
219.15	44.5713	27.4889	16.9883	8.7582	3.58948
219.37	44.5731	27.4949	16.9957	8.76386	3.59207
219.6	44.5749	27.5009	17.0031	8.76926	3.59476
219.82	44.5767	27.5066	17.0109	8.77488	3.59733
220.04	44.5784	27.5123	17.0182	8.78024	3.6
220.27	44.5802	27.5182	17.0258	8.78581	3.60267
220.5	44.582	27.5243	17.0331	8.79113	3.60521
220.71	44.5836	27.5293	17.0404	8.79642	3.60786
220.94	44.5853	27.5351	17.0479	8.8017	3.61039
221.16	44.5869	27.5405	17.0554	8.80719	3.61302
221.39	44.5886	27.5462	17.0625	8.81267	3.61564
221.62	44.5903	27.5516	17.0699	8.81788	3.61814
221.84	44.5919	27.557	17.077	8.82332	3.62075
222.07	44.5935	27.5626	17.0844	8.82849	3.62323
222.29	44.5951	27.5678	17.0917	8.83388	3.62582
222.51	44.5966	27.5733	17.099	8.83902	3.6284
222.74	44.5982	27.5785	17.1059	8.84437	3.63086
222.96	44.5997	27.5837	17.1128	8.8497	3.63342
223.18	44.6012	27.5889	17.12	8.85478	3.63598
223.41	44.6027	27.5942	17.1271	8.86007	3.63841
223.63	44.6041	27.5993	17.1339	8.86511	3.64095
223.86	44.6056	27.6043	17.141	8.87013	3.64348
224.08	44.6071	27.6096	17.1477	8.87559	3.646
224.31	44.6085	27.6145	17.1547	8.88057	3.64841
224.53	44.6099	27.6197	17.1614	8.88553	3.65091
224.75	44.6113	27.6246	17.1683	8.8907	3.65341
224.98	44.6127	27.6297	17.1749	8.89563	3.65579
225.2	44.614	27.6345	17.1818	8.90076	3.65827
225.43	44.6154	27.6396	17.1883	8.90565	3.66074
225.65	44.6168	27.6443	17.1951	8.91075	3.6632
225.88	44.6181	27.6491	17.2016	8.9156	3.66566
226.1	44.6194	27.654	17.2083	8.92065	3.668
226.32	44.6207	27.6587	17.2148	8.92547	3.67044
226.55	44.622	27.6635	17.2211	8.93048	3.67287
226.77	44.6232	27.6681	17.2278	8.93526	3.67518
226.99	44.6245	27.6729	17.2344	8.94002	3.6776
227.22	44.6257	27.6775	17.241	8.94498	3.68001
227.44	44.6269	27.682	17.247	8.94971	3.6823
227.67	44.6282	27.6867	17.2535	8.95463	3.68459
227.9	44.6294	27.6911	17.26	8.95954	3.68697
228.12	44.6306	27.6956	17.2664	8.96421	3.68935
228.34	44.6317	27.7	17.2726	8.96886	3.69161
228.56	44.6329	27.7045	17.2787	8.97371	3.69397
228.79	44.6341	27.7091	17.285	8.97854	3.69622
229.02	44.6352	27.7134	17.2911	8.98314	3.69856
229.24	44.6363	27.7177	17.2974	8.98793	3.7009
229.47	44.6375	27.7221	17.3034	8.9925	3.70313
229.69	44.6385	27.7263	17.3094	8.99726	3.70545
229.92	44.6397	27.7307	17.3156	9.00179	3.70766
230.14	44.6407	27.7349	17.3217	9.0063	3.70997
230.37	44.6418	27.7392	17.3276	9.01101	3.71237
230.59	44.6428	27.7433	17.3337	9.01549	3.71466
230.81	44.6439	27.7474	17.3396	9.02016	3.71684
231.04	44.6449	27.7516	17.3456	9.02481	3.71902
231.26	44.6459	27.7558	17.3514	9.02924	3.72119
231.5	44.647	27.7598	17.3574	9.03385	3.72345
231.73	44.648	27.7638	17.3631	9.03825	3.7256
231.95	44.649	27.7677	17.3691	9.04263	3.72785
232.17	44.6499	27.7718	17.3752	9.04719	3.73009
232.4	44.6509	27.7757	17.3809	9.05154	3.73222
232.62	44.6519	27.7799	17.3867	9.05607	3.73445
232.84	44.6528	27.7837	17.3926	9.06038	3.73657
233.07	44.6538	27.7877	17.3981	9.06468	3.73878
233.29	44.6547	27.7915	17.4036	9.06916	3.74098
233.52	44.6556	27.7954	17.4094	9.07362	3.74308
233.74	44.6565	27.7991	17.4151	9.07787	3.74526
233.96	44.6574	27.8029	17.4205	9.08229	3.74745
234.19	44.6583	27.8067	17.4262	9.08651	3.74962
234.41	44.6591	27.8104	17.4316	9.0909	3.75169
234.64	44.66	27.8141	17.437	9.09509	3.75385
234.87	44.6609	27.8178	17.4426	9.09945	3.756
235.09	44.6617	27.8215	17.4479	9.10398	3.75805
235.31	44.6625	27.825	17.4534	9.10793	3.76019
235.54	44.6634	27.8286	17.4587	9.11205	3.76223
235.76	44.6642	27.8321	17.4641	9.11635	3.76435
235.98	44.665	27.8357	17.4694	9.12044	3.76647
236.21	44.6658	27.8393	17.4748	9.1247	3.76848
236.43	44.6666	27.8428	17.4799	9.12876	3.77059
236.66	44.6674	27.8463	17.4851	9.13299	3.77268
236.88	44.6681	27.8496	17.4904	9.13702	3.77468
237.1	44.6689	27.8531	17.4955	9.14122	3.77685
237.32	44.6696	27.8564	17.5006	9.14521	3.77893
237.55	44.6704	27.8599	17.5059	9.14938	3.7809
237.77	44.6711	27.8632	17.5109	9.15353	3.78296
238	44.6719	27.8666	17.5161	9.15748	3.78502
238.22	44.6726	27.8699	17.5211	9.1616	3.78707
238.45	44.6733	27.8733	17.5262	9.16553	3.78902
238.67	44.674	27.8765	17.5312	9.16943	3.79096
238.9	44.6748	27.8797	17.5363	9.17351	3.79299
239.12	44.6754	27.883	17.5412	9.17739	3.79501
239.35	44.6761	27.8863	17.5462	9.18143	3.79694
239.57	44.6768	27.8894	17.5511	9.18528	3.79894
239.79	44.6775	27.8925	17.5561	9.18911	3.80094
240.02	44.6782	27.8957	17.5611	9.19311	3.80285
240.25	44.6788	27.8988	17.566	9.19692	3.80484
240.47	44.6795	27.9018	17.571	9.20088	3.80673
240.7	44.6801	27.9049	17.5755	9.20483	3.80871
240.92	44.6808	27.9079	17.5804	9.2086	3.81059
241.15	44.6814	27.9111	17.5851	9.21235	3.81255
241.37	44.682	27.914	17.5899	9.21625	3.81451
241.6	44.6826	27.9169	17.5945	9.21997	3.81637
241.82	44.6832	27.92	17.5991	9.22385	3.81831
242.05	44.6839	27.9229	17.6037	9.22754	3.82025
242.3	44.6845	27.9258	17.6085	9.23139	3.82218
242.5	44.685	27.929	17.613	9.23506	3.82402
242.74	44.6857	27.9316	17.6177	9.23871	3.82602
242.96	44.6862	27.9345	17.6222	9.24251	3.82784
243.19	44.6868	27.9373	17.6267	9.24614	3.82991
243.42	44.6874	27.9401	17.6314	9.24991	3.83189
243.64	44.688	27.943	17.636	9.25351	3.83386
243.86	44.6885	27.9457	17.6404	9.25709	3.83567
244.09	44.6891	27.9485	17.6448	9.26083	3.83771
244.32	44.6896	27.9513	17.6493	9.26438	3.83958
244.54	44.6901	27.954	17.6541	9.26809	3.84152
244.77	44.6907	27.9568	17.6584	9.27162	3.84338
244.99	44.6912	27.9594	17.6629	9.27529	3.84523
245.21	44.6917	27.9622	17.6674	9.27895	3.84724
245.44	44.6922	27.9648	17.6716	9.28229	3.849
245.66	44.6927	27.9675	17.6759	9.28592	3.85075
245.88	44.6932	27.9701	17.6803	9.28954	3.85266
246.11	44.6937	27.9728	17.6845	9.29299	3.8544
246.33	44.6942	27.9753	17.6888	9.29659	3.85621
246.56	44.6947	27.9778	17.693	9.30001	3.85802
246.78	44.6951	27.9804	17.6973	9.30373	3.85983
247.01	44.6956	27.9829	17.7014	9.30713	3.86154
247.23	44.6961	27.9854	17.7055	9.31067	3.86333
247.46	44.6966	27.988	17.7098	9.31404	3.86512
247.68	44.697	27.9904	17.7139	9.3174	3.86682
247.9	44.6975	27.9928	17.7181	9.3209	3.86859
248.13	44.6979	27.9954	17.7221	9.32423	3.87029
248.35	44.6984	27.9978	17.7263	9.32756	3.87205
248.57	44.6988	28.0001	17.7304	9.33102	3.87373
248.8	44.6992	28.0026	17.7344	9.33431	3.87548
249.03	44.6997	28.0049	17.7384	9.33775	3.87715
249.25	44.7001	28.0074	17.7428	9.34102	3.87888
249.47	44.7005	28.0097	17.7467	9.34443	3.88062
249.7	44.7009	28.012	17.7506	9.34767	3.88234
249.93	44.7013	28.0144	17.7546	9.35091	3.88399
250.15	44.7017	28.0166	17.7585	9.35428	3.88571
250.37	44.7021	28.019	17.7623	9.35749	3.88734
250.6	44.7025	28.0212	17.7663	9.36083	3.88905
250.82	44.7029	28.0235	17.7703	9.36402	3.89075
251.05	44.7033	28.0257	17.774	9.36734	3.89237
251.27	44.7037	28.028	17.7778	9.3705	3.89405
251.49	44.7041	28.0302	17.7817	9.37379	3.89566
251.72	44.7045	28.0324	17.7854	9.37693	3.89734
251.94	44.7048	28.0346	17.7893	9.3802	3.89901
252.16	44.7052	28.0368	17.793	9.38332	3.9006
252.39	44.7056	28.0389	17.7967	9.38656	3.90226
252.61	44.7059	28.0411	17.8005	9.38965	3.90385
252.83	44.7063	28.0432	17.8041	9.39287	3.9055
253.06	44.7066	28.0453	17.8079	9.39608	3.90707
253.29	44.707	28.0474	17.8115	9.39927	3.90871
253.51	44.7073	28.0495	17.8152	9.40232	3.91034
253.74	44.7077	28.0515	17.8188	9.40535	3.9119
253.96	44.708	28.0536	17.8225	9.40851	3.91352
254.18	44.7083	28.0556	17.826	9.41152	3.91514
254.41	44.7087	28.0577	17.8297	9.41465	3.91668
254.64	44.709	28.0597	17.8332	9.41764	3.91828
254.86	44.7093	28.0616	17.8367	9.42075	3.91988
255.08	44.7096	28.0637	17.8403	9.42385	3.92141
255.31	44.71	28.0656	17.8437	9.42681	3.92293
255.53	44.7103	28.0676	17.8472	9.42988	3.92452
255.76	44.7106	28.0695	17.8507	9.43281	3.9261
255.98	44.7109	28.0715	17.8541	9.43573	3.92767
256.21	44.7112	28.0734	17.8577	9.43877	3.92917
256.43	44.7115	28.0753	17.8612	9.44167	3.93074
256.66	44.7118	28.0772	17.8645	9.44456	3.9323
256.88	44.7121	28.079	17.868	9.44757	3.93385
257.11	44.7124	28.0809	17.8713	9.45043	3.9354
257.33	44.7127	28.0828	17.8746	9.45342	3.93694
257.56	44.7129	28.0846	17.8781	9.45626	3.93848
257.78	44.7132	28.0864	17.8813	9.45922	3.94002
258	44.7135	28.0882	17.8847	9.46204	3.94148
258.23	44.7138	28.09	17.888	9.46498	3.94307
258.45	44.714	28.0918	17.8912	9.46778	3.94459
258.68	44.7143	28.0937	17.8946	9.4707	3.94603
258.9	44.7146	28.0954	17.8977	9.47348	3.94754
259.13	44.7148	28.0971	17.9011	9.47638	3.94898
259.35	44.7151	28.0989	17.9044	9.47914	3.95048
259.57	44.7153	28.1006	17.9075	9.48188	3.95197
259.8	44.7156	28.1023	17.9108	9.48475	3.95346
260.02	44.7159	28.104	17.9139	9.4876	3.95488
260.25	44.7161	28.1057	17.917	9.49032	3.95636
260.48	44.7164	28.1074	17.9202	9.49315	3.95783
260.7	44.7166	28.1091	17.9233	9.49584	3.95923
260.92	44.7168	28.1108	17.9263	9.49865	3.9607
261.15	44.7171	28.1124	17.9295	9.50133	3.96216
261.37	44.7173	28.1141	17.9327	9.50411	3.96355
261.59	44.7175	28.1157	17.9357	9.50677	3.965
261.82	44.7178	28.1173	17.9388	9.50942	3.96644
262.04	44.718	28.1189	17.9418	9.51217	3.96782
262.27	44.7182	28.1205	17.9449	9.5148	3.96925
262.5	44.7185	28.122	17.9479	9.51753	3.97068
262.72	44.7187	28.1236	17.951	9.52026	3.97205
262.94	44.7189	28.1252	17.9539	9.52286	3.97347
263.17	44.7191	28.1267	17.9569	9.52556	3.97489
263.39	44.7193	28.1283	17.9598	9.52814	3.97624
263.61	44.7195	28.1298	17.9628	9.5307	3.9777
263.84	44.7197	28.1313	17.9657	9.53338	3.97911
264.06	44.7199	28.1328	17.9686	9.53593	3.9805
264.29	44.7201	28.1343	17.9717	9.53858	3.98183
264.52	44.7204	28.1358	17.9746	9.54111	3.98322
264.74	44.7205	28.1373	17.9774	9.54374	3.98461
264.96	44.7207	28.1388	17.9804	9.54636	3.98593
265.19	44.7209	28.1402	17.9831	9.54886	3.9873
265.41	44.7211	28.1416	17.9859	9.55135	3.98861
265.64	44.7213	28.1431	17.9888	9.55395	3.98998
265.86	44.7215	28.1445	17.9916	9.55642	3.99134
266.09	44.7217	28.146	17.9944	9.55899	3.99263
266.31	44.7219	28.1474	17.9971	9.56145	3.99393
266.53	44.7221	28.1487	18	9.56389	3.99528
266.76	44.7222	28.1502	18.0027	9.56644	3.99662
266.98	44.7224	28.1515	18.0055	9.56886	3.99796
267.2	44.7226	28.1529	18.0081	9.57139	3.99923
267.43	44.7228	28.1543	18.0109	9.5739	4.00056
267.65	44.7229	28.1556	18.0136	9.5763	4.00183
267.88	44.7231	28.157	18.0163	9.57869	4.00315
268.1	44.7233	28.1583	18.0189	9.58118	4.00441
268.32	44.7235	28.1596	18.0215	9.58366	4.00573
268.55	44.7236	28.161	18.0243	9.58602	4.00698
268.78	44.7238	28.1623	18.0268	9.58837	4.00828
269	44.724	28.1635	18.0295	9.59082	4.00958
269.22	44.7241	28.1649	18.0321	9.59316	4.01082
269.44	44.7243	28.1661	18.0347	9.59559	4.01211
269.67	44.7244	28.1674	18.0374	9.59801	4.0134
269.9	44.7246	28.1686	18.0399	9.60032	4.01462
270.12	44.7247	28.1699	18.0424	9.60262	4.0159
270.34	44.7249	28.1711	18.045	9.60502	4.01718
270.57	44.725	28.1724	18.0475	9.6073	4.01845
270.79	44.7252	28.1736	18.0501	9.60968	4.01966
271.02	44.7253	28.1748	18.0525	9.61194	4.02092
271.24	44.7255	28.176	18.055	9.6143	4.02212
271.47	44.7256	28.1773	18.0575	9.61655	4.02338
271.7	44.7258	28.1784	18.06	9.61889	4.02462
271.92	44.7259	28.1797	18.0625	9.62112	4.02587
272.15	44.726	28.1808	18.0649	9.62335	4.02706
272.37	44.7262	28.182	18.0674	9.62566	4.02824
272.59	44.7263	28.1832	18.0698	9.62797	4.02947
272.82	44.7265	28.1843	18.0722	9.63016	4.0307
273.04	44.7266	28.1854	18.0746	9.63235	4.03193
273.27	44.7267	28.1866	18.0769	9.63463	4.03309
273.49	44.7268	28.1877	18.0794	9.63691	4.03431
273.71	44.727	28.1889	18.0817	9.63907	4.03547
273.94	44.7271	28.19	18.0841	9.64132	4.03668
274.16	44.7272	28.1911	18.0864	9.64347	4.03788
274.38	44.7274	28.1922	18.0888	9.6459	4.03903
274.61	44.7275	28.1933	18.0911	9.64794	4.04023
274.84	44.7276	28.1944	18.0935	9.65016	4.04142
275.06	44.7277	28.1954	18.0957	9.65227	4.04256
275.29	44.7278	28.1965	18.0981	9.65448	4.04374
275.51	44.728	28.1976	18.1003	9.65658	4.04492
275.73	44.7281	28.1986	18.1026	9.65876	4.04605
275.96	44.7282	28.1997	18.1048	9.66085	4.04722
276.18	44.7283	28.2007	18.1071	9.66302	4.04834
276.41	44.7284	28.2017	18.1093	9.66509	4.04951
276.63	44.7285	28.2028	18.1116	9.66724	4.05067
276.86	44.7286	28.2038	18.1138	9.66929	4.05178
277.08	44.7287	28.2048	18.1159	9.67143	4.05293
277.31	44.7289	28.2058	18.1182	9.67356	4.05403
277.53	44.729	28.2068	18.1203	9.67559	4.05518
277.77	44.7291	28.2078	18.1226	9.67761	4.05632
277.99	44.7292	28.2088	18.1247	9.67971	4.05746
278.22	44.7293	28.2098	18.1269	9.68172	4.05859
278.44	44.7294	28.2108	18.1293	9.68381	4.05973
278.67	44.7295	28.2117	18.1312	9.6858	4.0608
278.89	44.7296	28.2127	18.1332	9.68787	4.06198
279.12	44.7297	28.2136	18.1354	9.68985	4.0631
279.34	44.7298	28.2146	18.1375	9.69191	4.06416
279.56	44.7299	28.2155	18.1396	9.69387	4.06528
279.79	44.73	28.2165	18.1417	9.69591	4.06639
280.01	44.7301	28.2174	18.1438	9.69786	4.06749
280.24	44.7302	28.2183	18.1458	9.69988	4.06859
280.46	44.7303	28.2192	18.1479	9.70182	4.06964
280.69	44.7304	28.2201	18.1499	9.70383	4.07074
280.91	44.7304	28.221	18.152	9.70583	4.07183
281.14	44.7305	28.2219	18.154	9.70783	4.07287
281.36	44.7306	28.2228	18.156	9.70973	4.07395
281.59	44.7307	28.2237	18.1581	9.71162	4.07503
281.81	44.7308	28.2246	18.16	9.7136	4.07606
282.04	44.7309	28.2255	18.162	9.71548	4.07709
282.26	44.731	28.2263	18.164	9.71744	4.07815
282.48	44.7311	28.2272	18.166	9.71939	4.07922
282.71	44.7311	28.228	18.1679	9.72125	4.08028
282.93	44.7312	28.2289	18.1699	9.7231	4.0813
283.16	44.7313	28.2297	18.1718	9.72503	4.08235
283.38	44.7314	28.2306	18.1737	9.72687	4.0834
283.61	44.7315	28.2314	18.1757	9.72878	4.08445
283.84	44.7315	28.2323	18.1776	9.73069	4.08545
284.06	44.7316	28.2331	18.1795	9.73251	4.08645
284.29	44.7317	28.2339	18.1814	9.73432	4.08748
284.52	44.7318	28.2347	18.1833	9.7362	4.08852
284.74	44.7318	28.2355	18.1851	9.73808	4.0895
284.96	44.7319	28.2363	18.187	9.73987	4.09053
285.19	44.732	28.2371	18.1888	9.74166	4.09156
285.42	44.7321	28.2379	18.1907	9.74351	4.09253
285.64	44.7321	28.2386	18.1925	9.74528	4.09355
285.86	44.7322	28.2394	18.1944	9.74713	4.09452
286.09	44.7323	28.2402	18.1962	9.74896	4.09549
286.31	44.7324	28.241	18.1979	9.75079	4.0965
286.54	44.7324	28.2417	18.1998	9.75253	4.0975
286.76	44.7325	28.2425	18.2016	9.75427	4.09846
286.99	44.7326	28.2432	18.2034	9.75608	4.09946
287.21	44.7326	28.244	18.2052	9.7578	4.10045
287.43	44.7327	28.2447	18.2069	9.7596	4.1014
287.66	44.7328	28.2455	18.2086	9.76139	4.10239
287.88	44.7328	28.2462	18.2104	9.76309	4.10337
288.11	44.7329	28.2469	18.2121	9.76486	4.10435
288.33	44.7329	28.2476	18.2139	9.76663	4.10529
288.56	44.733	28.2484	18.2157	9.76839	4.10626
288.78	44.7331	28.2491	18.2174	9.77007	4.10719
289.01	44.7331	28.2497	18.2191	9.77174	4.10816
289.23	44.7332	28.2505	18.2208	9.77348	4.10913
289.45	44.7333	28.2512	18.2225	9.77522	4.11009
289.68	44.7333	28.2518	18.2242	9.77687	4.111
289.9	44.7334	28.2525	18.2258	9.77852	4.112
290.13	44.7334	28.2532	18.2275	9.78023	4.11291
290.35	44.7335	28.2539	18.2291	9.78186	4.11386
290.57	44.7335	28.2546	18.2308	9.78357	4.11477
290.8	44.7336	28.2552	18.2324	9.78519	4.11571
291.02	44.7337	28.2559	18.234	9.7868	4.11665
291.25	44.7337	28.2566	18.2357	9.78849	4.11759
291.47	44.7338	28.2572	18.2374	9.79016	4.11848
291.7	44.7338	28.2579	18.2389	9.79183	4.11941
291.92	44.7339	28.2585	18.2405	9.79342	4.1203
292.14	44.7339	28.2591	18.2421	9.79501	4.12122
292.36	44.734	28.2598	18.2437	9.79666	4.12215
292.59	44.734	28.2604	18.2453	9.79823	4.12306
292.81	44.7341	28.2611	18.2469	9.79987	4.12394
293.03	44.7341	28.2617	18.2485	9.80143	4.12485
293.26	44.7342	28.2623	18.25	9.80306	4.12572
293.49	44.7342	28.2629	18.2515	9.80468	4.12663
293.71	44.7343	28.2635	18.2531	9.80622	4.12749
293.93	44.7343	28.2641	18.2546	9.80783	4.12839
294.15	44.7344	28.2647	18.2562	9.80936	4.12929
294.38	44.7344	28.2653	18.2577	9.81103	4.13015
294.61	44.7345	28.2659	18.2592	9.81255	4.13104
294.83	44.7345	28.2665	18.2607	9.81413	4.13189
295.05	44.7346	28.2671	18.2622	9.81564	4.13277
295.28	44.7346	28.2677	18.2637	9.81721	4.13366
295.5	44.7346	28.2683	18.2652	9.81871	4.1345
295.73	44.7347	28.2688	18.2667	9.82027	4.13538
295.95	44.7347	28.2694	18.2682	9.82175	4.13625
296.18	44.7348	28.27	18.2696	9.82323	4.13708
296.4	44.7348	28.2705	18.2711	9.82471	4.13795
296.63	44.7349	28.2711	18.2725	9.82624	4.13878
296.85	44.7349	28.2717	18.274	9.82777	4.13964
297.08	44.7349	28.2722	18.2754	9.82923	4.1405
297.3	44.735	28.2728	18.2769	9.83068	4.14136
297.52	44.735	28.2733	18.2783	9.8322	4.14221
297.75	44.7351	28.2739	18.2797	9.83364	4.14303
297.97	44.7351	28.2744	18.2811	9.83514	4.14388
298.2	44.7351	28.275	18.2825	9.83664	4.14469
298.42	44.7352	28.2755	18.2839	9.83806	4.14553
298.65	44.7352	28.276	18.2853	9.83954	4.14637
298.87	44.7353	28.2765	18.2867	9.84096	4.14717
299.1	44.7353	28.2771	18.2881	9.8423	4.14779
299.32	44.7353	28.2776	18.2895	9.84377	4.11283
299.55	44.7354	28.2781	18.2908	9.84517	4.10979
299.77	44.7354	28.2786	18.2922	9.84663	4.09818
299.99	44.7354	28.2791	18.2935	9.84808	4.0871
300.22	44.7355	28.2796	18.2949	9.84952	4.07555
300.44	44.7355	28.2801	18.2962	9.85028	4.06404
300.67	44.7355	28.2806	18.2973	9.81532	4.05255
300.89	44.7356	28.2811	18.2623	9.80325	4.0416
300.95	44.7356	28.2816	18.2534	9.77435	4.03018
300.95	44.7006	28.2821	18.2018	9.74672	4.01928
301.11	44.6127	28.2822	18.1526	9.72038	4.00793
301.34	44.4867	28.2473	18.1013	9.69291	3.99709
301.56	44.3664	28.1917	18.0523	9.66671	3.9858
301.79	44.241	28.1155	18.0013	9.64058	3.97453
302.01	44.1214	28.0395	17.9527	9.61334	3.96379
302.24	43.9968	27.9603	17.9019	9.58735	3.95259
302.46	43.8778	27.8847	17.8536	9.56026	3.94142
302.69	43.7538	27.8059	17.8031	9.53442	3.93077
302.91	43.6356	27.7307	17.7528	9.50747	3.91966
303.14	43.5123	27.6524	17.7048	9.48178	3.90858
303.36	43.3947	27.5776	17.6569	9.45498	3.89802
303.58	43.2774	27.4997	17.6071	9.42826	3.887
303.81	43.1551	27.4254	17.5573	9.40278	3.87602
304.04	43.0331	27.3512	17.5098	9.37621	3.86554
304.26	42.9168	27.2739	17.4625	9.34971	3.85509
304.48	42.8008	27.2002	17.4132	9.32444	3.8442
304.71	42.6798	27.1267	17.3661	9.29809	3.83334
304.94	42.5592	27.05	17.317	9.27182	3.8225
305.16	42.4442	26.9769	17.2702	9.24675	3.81217
305.38	42.3295	26.904	17.2214	9.22176	3.8014
305.61	42.2098	26.828	17.1749	9.1957	3.79112
305.83	42.0957	26.7554	17.1263	9.17084	3.78041
306.06	41.9768	26.6798	17.0779	9.14605	3.76973
306.28	41.8633	26.6077	17.0318	9.12021	3.75907
306.5	41.7502	26.5358	16.9836	9.09444	3.74891
306.73	41.6322	26.4608	16.9377	9.06985	3.73832
306.95	41.5197	26.3893	16.8919	9.04422	3.72821
307.18	41.4023	26.318	16.8463	9.01978	3.71768
307.4	41.2904	26.2436	16.8007	8.99429	3.70717
307.63	41.1737	26.1726	16.7533	8.96998	3.69715
307.85	41.0624	26.1019	16.7059	8.94463	3.68671
308.07	40.9514	26.0281	16.6608	8.92045	3.67629
308.3	40.8357	25.9578	16.6157	8.89524	3.66635
308.53	40.7203	25.8876	16.5688	8.8712	3.65599
308.75	40.6103	25.8145	16.522	8.84613	3.64566
308.98	40.4955	25.7447	16.4773	8.82222	3.6358
309.2	40.386	25.6719	16.4328	8.79729	3.62553
309.42	40.2769	25.5994	16.3863	8.77351	3.61573
309.65	40.1631	25.5302	16.342	8.74872	3.60551
309.87	40.0545	25.4581	16.2959	8.72399	3.59577
310.1	39.9413	25.3892	16.2518	8.70148	3.58561
310.32	39.8333	25.3206	16.2059	8.67689	3.57547
310.56	39.7159	25.2522	16.1621	8.65344	3.56537
310.79	39.6037	25.1808	16.1164	8.62899	3.55573
311.01	39.4966	25.1127	16.0728	8.60566	3.54569
311.23	39.3898	25.0418	16.0294	8.5824	3.53567
311.46	39.2785	24.9741	15.9841	8.55815	3.52611
311.69	39.1675	24.9066	15.9409	8.53501	3.51614
311.91	39.0617	24.8362	15.8958	8.5109	3.50664
312.14	38.9513	24.7691	15.8529	8.48685	3.49673
312.36	38.846	24.6991	15.8081	8.46391	3.48685
312.58	38.741	24.6323	15.7654	8.44103	3.477
312.81	38.6315	24.5627	15.7208	8.41717	3.4676
313.04	38.5224	24.4963	15.6783	8.39442	3.4578
313.26	38.4182	24.4271	15.634	8.36967	3.44845
313.48	38.3144	24.3611	15.5917	8.34602	3.43871
313.71	38.2061	24.2952	15.5477	8.32346	3.42899
313.94	38.0982	24.2266	15.5037	8.29994	3.41972
314.16	37.9952	24.1611	15.4618	8.2775	3.41006
314.38	37.8925	24.0958	15.42	8.25411	3.40084
314.61	37.7854	24.0277	15.3765	8.23079	3.39123
314.83	37.6832	23.9598	15.3349	8.20854	3.38165
315.06	37.5768	23.895	15.2935	8.18635	3.37209
315.28	37.4752	23.8275	15.2502	8.16422	3.36298
315.51	37.3693	23.7631	15.2071	8.14115	3.35347
315.73	37.2683	23.6988	15.166	8.11815	3.344
315.96	37.163	23.6319	15.125	8.0962	3.33455
316.18	37.0625	23.568	15.0823	8.07432	3.32513
316.41	36.9578	23.5043	15.0397	8.0515	3.31573
316.63	36.8579	23.4379	14.999	8.02974	3.30677
316.85	36.7582	23.3745	14.9566	8.00705	3.29742
317.08	36.6544	23.3085	14.9162	7.9854	3.28851
317.3	36.5553	23.2455	14.8759	7.96284	3.27922
317.53	36.452	23.1826	14.8357	7.94131	3.27035
317.76	36.349	23.1171	14.7938	7.91985	3.26111
317.98	36.2507	23.0518	14.7538	7.89747	3.2523
318.21	36.1483	22.9895	14.7121	7.87515	3.24311
318.43	36.0506	22.9273	14.6705	7.85386	3.23434
318.65	35.9531	22.8625	14.6309	7.83264	3.2252
318.88	35.8515	22.8007	14.5895	7.81146	3.21648
319.1	35.7546	22.7391	14.5501	7.78939	3.20739
319.33	35.6536	22.6749	14.5107	7.76738	3.19833
319.55	35.5572	22.6136	14.4697	7.74638	3.18929
319.78	35.4567	22.5497	14.4306	7.72544	3.18067
320	35.3609	22.4887	14.3898	7.70361	3.17168
320.22	35.2653	22.4252	14.351	7.68184	3.16311
320.45	35.1657	22.3645	14.3104	7.66108	3.15417
320.67	35.0706	22.3013	14.2717	7.64037	3.14564
320.9	34.9715	22.2411	14.2314	7.61878	3.13676
321.12	34.877	22.1809	14.1929	7.59819	3.12828
321.35	34.7784	22.1183	14.1528	7.57671	3.11944
321.57	34.6844	22.0585	14.1128	7.55623	3.11062
321.8	34.5864	21.9989	14.0747	7.53581	3.10183
322.02	34.4929	21.9394	14.0366	7.51451	3.09345
322.24	34.3997	21.8774	13.9987	7.49328	3.08395
322.47	34.3025	21.8156	13.9591	7.47302	3.07561
322.69	34.2097	21.7593	13.9214	7.45282	3.06692
322.92	34.1131	21.6978	13.8821	7.43176	3.05863
323.14	34.0209	21.6391	13.8445	7.41168	3.04999
323.36	33.9289	21.578	13.8054	7.39073	3.04137
323.6	33.8289	21.5197	13.7681	7.37075	3.03315
323.83	33.7333	21.4615	13.7292	7.35083	3.02495
324.06	33.6379	21.4008	13.6921	7.33006	3.0164
324.28	33.547	21.343	13.6534	7.31024	3.00788
324.5	33.4563	21.2853	13.6165	7.28959	2.99975
324.73	33.3618	21.2252	13.578	7.26988	2.99127
324.95	33.2716	21.1678	13.5413	7.24934	2.98282
325.18	33.1776	21.108	13.503	7.22885	2.97475
325.4	33.0879	21.0509	13.4649	7.20931	2.96635
325.62	32.9985	20.9914	13.4301	7.18983	2.95797
325.85	32.9052	20.9347	13.3922	7.16951	2.94997
326.07	32.8163	20.8781	13.356	7.15013	2.94163
326.3	32.7236	20.8191	13.3182	7.12992	2.93332
326.52	32.6351	20.7628	13.2822	7.10978	2.92539
326.75	32.5429	20.7067	13.2463	7.09056	2.91713
326.97	32.4549	20.6482	13.2089	7.07139	2.90888
327.2	32.3632	20.5898	13.1732	7.04621	2.90102
327.42	32.2757	20.5342	13.1376	7.03148	2.89282
327.64	32.1885	20.4787	13.0989	7.01161	2.88465
327.87	32.0975	20.4208	13.0634	6.99266	2.87685
328.1	32.0068	20.3656	13.0281	6.97376	2.86872
328.32	31.9203	20.3081	12.9913	6.95405	2.86097
328.54	31.834	20.2532	12.9562	6.93526	2.85253
328.77	31.7441	20.1959	12.9212	6.91566	2.84482
328.99	31.6583	20.1413	12.8847	6.89696	2.83678
329.22	31.5688	20.0844	12.8498	6.87747	2.82911
329.44	31.4835	20.0277	12.8135	6.85888	2.82112
329.67	31.3945	19.9735	12.7773	6.8395	2.81349
329.89	31.3096	19.9195	12.7443	6.82101	2.8052
330.11	31.225	19.8633	12.7083	6.80258	2.79761
330.34	31.1368	19.8096	12.6724	6.78335	2.78971
330.57	31.0488	19.756	12.6382	6.76502	2.78217
330.79	30.9648	19.7002	12.604	6.74673	2.77431
331.01	30.8811	19.6445	12.5684	6.72767	2.76681
331.24	30.7939	19.5914	12.5344	6.70866	2.75899
331.46	30.7106	19.5385	12.5005	6.69052	2.75153
331.69	30.6239	19.4856	12.4652	6.67162	2.74342
331.91	30.5411	19.4306	12.43	6.65358	2.736
332.14	30.4548	19.3781	12.3964	6.63478	2.72827
332.36	30.3725	19.3233	12.3614	6.61685	2.7209
332.58	30.2904	19.2711	12.3279	6.59815	2.71321
332.81	30.2048	19.219	12.2931	6.58031	2.70587
333.03	30.1231	19.1647	12.2584	6.56252	2.69856
333.25	30.0417	19.1129	12.2252	6.54398	2.69093
333.48	29.9568	19.0612	12.1922	6.52549	2.68366
333.7	29.8758	19.0073	12.1577	6.50785	2.67608
333.93	29.7914	18.9536	12.1249	6.49026	2.66884
334.15	29.7109	18.9024	12.0906	6.47192	2.6613
334.38	29.6269	18.8513	12.0564	6.45363	2.65378
334.6	29.5468	18.798	12.0239	6.43618	2.64661
334.82	29.467	18.7472	11.9914	6.418	2.63913
335.05	29.3837	18.6965	11.9575	6.40065	2.63199
335.28	29.3007	18.6437	11.9251	6.38256	2.62456
335.5	29.2215	18.5933	11.8914	6.36609	2.61714
335.73	29.1389	18.5408	11.8593	6.3481	2.60974
335.95	29.0601	18.4884	11.8272	6.33016	2.60237
336.17	28.9816	18.4384	11.7938	6.31228	2.59534
336.4	28.8997	18.3863	11.7605	6.29521	2.588
336.62	28.8216	18.3366	11.7287	6.2782	2.58069
336.85	28.7401	18.287	11.6956	6.26046	2.57371
337.08	28.6589	18.2354	11.664	6.24353	2.56644
337.3	28.5814	18.1861	11.6324	6.22589	2.55919
337.53	28.5007	18.1369	11.5996	6.20906	2.55227
337.75	28.4236	18.0879	11.5682	6.19152	2.54506
337.98	28.3433	18.0368	11.5355	6.17402	2.53818
338.2	28.2667	17.988	11.5043	6.15733	2.53101
338.46	28.1764	17.9394	11.4732	6.14069	2.52385
338.65	28.1106	17.8887	11.4408	6.12334	2.51703
338.87	28.0346	17.8228	11.4099	6.10603	2.50992
339.1	27.9554	17.7899	11.379	6.08953	2.50283
339.33	27.8764	17.7418	11.3469	6.07307	2.49606
339.55	27.8011	17.6917	11.3148	6.05591	2.48931
339.78	27.7225	17.6439	11.2842	6.03954	2.48228
340	27.6476	17.5962	11.2523	6.02247	2.47527
340.22	27.5728	17.5486	11.2219	6.00619	2.46857
340.45	27.4949	17.499	11.1902	5.98922	2.4616
340.68	27.4172	17.4517	11.16	5.97303	2.45464
340.9	27.3431	17.4046	11.1284	5.95615	2.44801
341.12	27.2692	17.3575	11.0984	5.94005	2.44109
341.35	27.1921	17.3106	11.0684	5.92326	2.43449
341.57	27.1186	17.2617	11.0371	5.90725	2.42761
341.8	27.042	17.215	11.0059	5.89056	2.42016
342.02	26.9689	17.1664	10.9761	5.87464	2.41272
342.24	26.896	17.12	10.9451	5.85876	2.4062
342.48	26.8167	17.0695	10.9155	5.8422	2.3997
342.71	26.7409	17.0234	10.886	5.82569	2.39203
342.93	26.6686	16.9753	10.8553	5.80995	2.38527
343.16	26.5933	16.9294	10.8259	5.79353	2.37795
343.38	26.5214	16.8815	10.7953	5.77787	2.37152
343.61	26.4465	16.8338	10.7648	5.76154	2.36453
343.83	26.375	16.7883	10.7357	5.74597	2.35814
344.06	26.3004	16.7429	10.7067	5.72973	2.35176
344.28	26.2294	16.6956	10.6765	5.71424	2.34368
344.5	26.1584	16.6525	10.6476	5.69809	2.33705
344.73	26.0845	16.6055	10.6175	5.68269	2.33016
344.97	26.0076	16.5606	10.5888	5.66733	2.32301
345.19	25.9373	16.5138	10.5602	5.65132	2.31616
345.41	25.8672	16.4692	10.5303	5.63604	2.3099
345.64	25.7941	16.4226	10.5019	5.62081	2.3028
345.86	25.7244	16.3782	10.4722	5.60492	2.29573
346.08	25.6549	16.334	10.4439	5.58977	2.28952
346.31	25.5824	16.2878	10.4157	5.57398	2.28305
346.54	25.5101	16.2438	10.3862	5.55822	2.27688
346.76	25.4411	16.1999	10.3582	5.5432	2.27045
346.98	25.3723	16.1561	10.3302	5.52822	2.26431
347.22	25.2975	16.1104	10.301	5.5126	2.25791
347.44	25.2292	16.0649	10.2719	5.49769	2.25181
347.67	25.1579	16.0215	10.2441	5.48283	2.24545
347.89	25.0899	15.9782	10.2164	5.46734	2.2391
348.12	25.019	15.933	10.1875	5.45256	2.23305
348.34	24.9513	15.89	10.16	5.43715	2.22674
348.56	24.8839	15.8451	10.1313	5.42246	2.22045
348.79	24.8136	15.8022	10.1039	5.40713	2.21444
349.01	24.7465	15.7595	10.0766	5.39252	2.20819
349.24	24.6766	15.7169	10.0481	5.37728	2.20222
349.46	24.6099	15.6744	10.0197	5.36208	2.19599
349.68	24.5433	15.6301	9.99264	5.34759	2.19006
349.9	24.477	15.5821	9.96318	5.33313	2.18387
350.13	24.4078	15.54	9.93747	5.31806	2.1777
350.35	24.3419	15.4923	9.9106	5.30304	2.17181
350.58	24.2731	15.4466	9.8826	5.2887	2.16568
350.8	24.2075	15.4011	9.85589	5.27441	2.15956
351.03	24.139	15.3575	9.82803	5.2595	2.15372
351.25	24.0738	15.3141	9.80026	5.24528	2.14737
351.47	24.0087	15.269	9.77377	5.23046	2.14156
351.7	23.9409	15.2258	9.74735	5.21632	2.13577
351.92	23.8762	15.1791	9.71981	5.20222	2.12948
352.15	23.8087	15.1343	9.69353	5.18752	2.12372
352.37	23.7443	15.0934	9.66614	5.1735	2.11772
352.59	23.6802	15.0471	9.64001	5.15888	2.112
352.82	23.6132	15.0027	9.61277	5.14494	2.10577
353.04	23.5494	14.9566	9.58679	5.1304	2.10008
353.26	23.4858	14.9162	9.5597	5.11653	2.09414
353.5	23.4165	14.8759	9.53386	5.10207	2.08822
353.73	23.3503	14.8338	9.50809	5.08828	2.08232
353.95	23.2872	14.7937	9.48122	5.0739	2.07669
354.18	23.2214	14.7519	9.45559	5.06019	2.07083
354.4	23.1586	14.7121	9.43003	5.04651	2.06497
354.63	23.0932	14.6705	9.40338	5.03225	2.05939
354.85	23.0308	14.6308	9.37797	5.01803	2.05383
355.08	22.9657	14.5895	9.35147	5.00446	2.04777
355.3	22.9036	14.55	9.32619	4.99032	2.04223
355.52	22.8417	14.5107	9.29983	4.97683	2.03646
355.75	22.7772	14.4697	9.2747	4.96277	2.03096
355.97	22.7156	14.4306	9.24962	4.94935	2.02522
356.2	22.6514	14.3898	9.22349	4.93598	2.0195
356.42	22.5902	14.3509	9.19742	4.92263	2.01404
356.65	22.5263	14.3104	9.17256	4.90812	2.00835
356.87	22.4655	14.2717	9.14777	4.89485	2.00292
357.09	22.4047	14.2331	9.12192	4.88102	1.99726
357.32	22.3414	14.1929	9.09614	4.86783	1.99186
357.54	22.281	14.1545	9.07155	4.85467	1.98623
357.77	22.2181	14.1145	9.04592	4.84095	1.98086
357.99	22.158	14.0764	9.02147	4.82786	1.97526
358.22	22.0954	14.0366	8.99708	4.81422	1.96968
358.44	22.0357	13.9987	8.97166	4.80121	1.96436
358.67	21.9734	13.9591	8.94741	4.78764	1.95881
358.89	21.914	13.9214	8.92322	4.7747	1.95351
359.11	21.8548	13.8837	8.89801	4.76121	1.94799
359.34	21.793	13.8445	8.87286	4.74834	1.94249
359.56	21.7341	13.8071	8.84888	4.73492	1.93724
359.79	21.6727	13.7681	8.82387	4.72212	1.93176
360.01	21.6141	13.7292	8.80002	4.70878	1.9263
360.23	21.5557	13.692	8.77623	4.69605	1.9211
360.46	21.4948	13.655	8.75143	4.68336	1.91567
360.68	21.4367	13.6165	8.72778	4.67012	1.91026
360.91	21.3761	13.578	8.70311	4.65692	1.90509
361.15	21.3131	13.5413	8.67959	4.64434	1.89971
361.35	21.2607	13.5047	8.65613	4.63121	1.89457
361.57	21.2032	13.4665	8.63167	4.61869	1.88922
361.8	21.1433	13.4285	8.60728	4.60564	1.88365
362.02	21.0861	13.3922	8.58401	4.59319	1.87833
362.25	21.0266	13.3543	8.56081	4.58021	1.87325
362.47	20.9697	13.3182	8.53661	4.56727	1.86796
362.7	20.9105	13.2822	8.51354	4.55492	1.86291
362.92	20.8539	13.2447	8.48948	4.54261	1.85764
363.14	20.7976	13.2089	8.46653	4.52978	1.85239
363.39	20.7337	13.1716	8.44261	4.51698	1.84739
363.61	20.6776	13.1359	8.41875	4.50477	1.84217
363.84	20.6192	13.0988	8.396	4.49259	1.83719
364.06	20.5635	13.0634	8.3733	4.47989	1.83177
364.28	20.5079	13.0281	8.34964	4.46778	1.82682
364.51	20.4499	12.9913	8.32707	4.45516	1.82166
364.73	20.3947	12.9562	8.30354	4.44312	1.81673
364.96	20.337	12.9212	8.28109	4.43111	1.8116
365.18	20.2821	12.8862	8.25769	4.41858	1.8067
365.41	20.2248	12.8498	8.23537	4.40664	1.8016
365.63	20.1701	12.8151	8.21311	4.39419	1.7965
365.86	20.1131	12.7789	8.1899	4.38231	1.79165
366.08	20.0587	12.7443	8.16776	4.36993	1.78659
366.31	20.002	12.7083	8.14569	4.35758	1.78154
366.53	19.948	12.674	8.12267	4.3458	1.77672
366.76	19.8916	12.6381	8.10071	4.33405	1.7717
366.98	19.8378	12.604	8.07782	4.32181	1.76691
367.2	19.7842	12.5684	8.05598	4.31012	1.76192
367.43	19.7283	12.5344	8.03322	4.29794	1.75694
367.65	19.675	12.499	8.01151	4.28633	1.75219
367.88	19.6194	12.4652	7.98887	4.27421	1.74724
368.1	19.5663	12.4315	7.96727	4.26266	1.74252
368.32	19.5135	12.3964	7.94476	4.25061	1.73759
368.55	19.4583	12.3613	7.92328	4.2386	1.73268
368.77	19.4057	12.3279	7.90089	4.22715	1.728
369	19.3509	12.2931	7.87954	4.2152	1.72312
369.23	19.2962	12.2599	7.85727	4.20381	1.71846
369.45	19.244	12.2252	7.83603	4.19244	1.7136
369.67	19.192	12.1922	7.81485	4.1806	1.70855
369.91	19.1354	12.1592	7.79277	4.1693	1.70372
370.14	19.0814	12.1249	7.7717	4.15751	1.69912
370.36	19.0298	12.0921	7.74974	4.14628	1.69431
370.59	18.976	12.0579	7.72879	4.13456	1.68953
370.81	18.9247	12.0253	7.70695	4.12338	1.68475
371.04	18.8712	11.9913	7.68612	4.11173	1.67999
371.26	18.8202	11.9589	7.66534	4.10062	1.67545
371.48	18.7693	11.9251	7.64086	4.08903	1.67072
371.71	18.7163	11.8929	7.62302	4.07798	1.6662
371.93	18.6657	11.8593	7.60148	4.06695	1.66149
372.16	18.613	11.8272	7.58093	4.05546	1.657
372.38	18.5627	11.7953	7.55951	4.0445	1.65232
372.6	18.5125	11.7619	7.53908	4.03307	1.64765
372.83	18.4602	11.7301	7.5187	4.02167	1.64299
373.05	18.4103	11.697	7.49745	4.0108	1.63855
373.28	18.3582	11.6654	7.47718	3.99996	1.63392
373.51	18.3064	11.6338	7.45606	3.98866	1.6293
373.73	18.2569	11.601	7.4359	3.97739	1.6247
373.95	18.2075	11.5696	7.41489	3.96712	1.62031
374.18	18.1561	11.5383	7.39485	3.95591	1.61573
374.4	18.107	11.5057	7.37395	3.94473	1.61136
374.63	18.0558	11.4746	7.35402	3.93359	1.60681
374.85	18.007	11.4422	7.33324	3.92295	1.60227
375.07	17.9584	11.4113	7.31341	3.91187	1.59774
375.3	17.9076	11.379	7.29275	3.90129	1.59342
375.52	17.8592	11.3483	7.27303	3.89075	1.58892
375.74	17.8109	11.3176	7.25248	3.8788	1.58443
375.97	17.7606	11.287	7.23288	3.86927	1.57995
376.19	17.7126	11.2523	7.21333	3.85881	1.57568
376.43	17.6604	11.2219	7.19294	3.8479	1.57123
376.66	17.6105	11.1916	7.1735	3.8375	1.56698
376.88	17.5629	11.16	7.15323	3.82666	1.56255
377.11	17.5132	11.1298	7.13302	3.81585	1.55833
377.33	17.4659	11.0983	7.11373	3.80553	1.55393
377.56	17.4165	11.0683	7.09451	3.79524	1.54954
377.78	17.3695	11.0371	7.07446	3.78452	1.54516
378	17.3225	11.0072	7.05533	3.77429	1.54098
378.23	17.2736	10.9775	7.0354	3.76362	1.53681
378.46	17.2247	10.9478	7.01638	3.75299	1.53247
378.68	17.1782	10.9169	6.99655	3.74284	1.52833
378.9	17.1318	10.8874	6.97764	3.73273	1.52401
379.13	17.0833	10.8579	6.95878	3.72218	1.51952
379.35	17.0372	10.8272	6.93997	3.71166	1.51522
379.58	16.989	10.798	6.92036	3.70163	1.51113
379.8	16.9431	10.7675	6.90165	3.69162	1.50686
380.03	16.8952	10.7384	6.88215	3.68119	1.50278
380.25	16.8496	10.7093	6.86355	3.67124	1.49854
380.48	16.8019	10.6804	6.84415	3.66087	1.4943
380.7	16.7565	10.6502	6.82565	3.65097	1.49008
380.92	16.7112	10.6214	6.80636	3.64065	1.48605
381.15	16.664	10.5914	6.78797	3.63037	1.48204
381.37	16.619	10.5628	6.76878	3.62055	1.47785
381.6	16.572	10.5342	6.75049	3.61032	1.47367
381.82	16.5272	10.5044	6.73141	3.60056	1.46969
382.04	16.4825	10.4761	6.71239	3.59083	1.46554
382.27	16.4359	10.4465	6.69342	3.58068	1.46139
382.49	16.3915	10.4195	6.67533	3.57056	1.45744
382.72	16.3452	10.3913	6.65729	3.56091	1.45315
382.94	16.301	10.3632	6.63847	3.55129	1.44922
383.16	16.257	10.3352	6.62053	3.54125	1.4453
383.39	16.211	10.3073	6.60263	3.53168	1.44122
383.61	16.1672	10.2782	6.58397	3.52213	1.43732
383.84	16.1215	10.2504	6.56618	3.51218	1.43326
384.07	16.076	10.2214	6.54762	3.50226	1.42921
384.29	16.0325	10.1938	6.52992	3.49279	1.42517
384.51	15.9892	10.1662	6.51147	3.48292	1.42114
384.73	15.9459	10.1375	6.49387	3.4735	1.4173
384.96	15.9009	10.1101	6.47552	3.46369	1.4133
385.18	15.8579	10.0828	6.45802	3.45433	1.4093
385.41	15.8131	10.0543	6.44056	3.44499	1.40532
385.63	15.7703	10.0271	6.42236	3.43525	1.40152
385.86	15.7258	10	6.405	3.42597	1.39756
386.08	15.6833	9.97174	6.3869	3.41629	1.39378
386.3	15.6409	9.94479	6.36964	3.40705	1.38985
386.53	15.5967	9.91669	6.35242	3.39826	1.38609
386.75	15.5545	9.88866	6.33369	3.38866	1.382
386.98	15.5106	9.86193	6.31579	3.3795	1.3781
387.2	15.4686	9.83527	6.29872	3.36995	1.37437
387.43	15.4249	9.80748	6.28169	3.36084	1.37049
387.65	15.3832	9.78097	6.26394	3.35134	1.36662
387.87	15.3417	9.75333	6.24624	3.34228	1.36275
388.1	15.2983	9.72697	6.22936	3.33325	1.3589
388.32	15.2569	9.70068	6.21252	3.32424	1.35523
388.55	15.2138	9.67326	6.19496	3.31484	1.35123
388.77	15.1727	9.64593	6.17822	3.30588	1.34742
388.99	15.1317	9.61986	6.16152	3.29654	1.34377
389.22	15.0889	9.59385	6.14411	3.28763	1.33998
389.44	15.0482	9.56556	6.12674	3.27834	1.33635
389.67	15.0056	9.53971	6.11018	3.26908	1.33258
389.89	14.9651	9.51275	6.09292	3.26064	1.32881
390.11	14.9246	9.48704	6.0757	3.25143	1.32506
390.34	14.8824	9.46139	6.05928	3.24264	1.32147
390.56	14.8422	9.43466	6.0429	3.23348	1.31774
390.8	14.7985	9.40915	6.02582	3.22474	1.31402
391.03	14.7566	9.38257	6.00953	3.21602	1.3103
391.25	14.7167	9.3572	5.99255	3.20693	1.3066
391.47	14.677	9.33076	5.97635	3.19826	1.30291
391.7	14.6355	9.30554	5.95946	3.18923	1.29923
391.92	14.5959	9.28039	5.94336	3.1806	1.29572
392.15	14.5547	9.25416	5.92656	3.17162	1.29205
392.37	14.5153	9.22915	5.91054	3.16304	1.2884
392.6	14.4743	9.2042	5.89384	3.15411	1.28492
392.82	14.4352	9.17819	5.87791	3.14558	1.28145
393.05	14.3944	9.15225	5.8613	3.13669	1.27783
393.27	14.3555	9.12751	5.84545	3.12821	1.27422
393.5	14.3149	9.10284	5.82894	3.11937	1.27061
393.72	14.2762	9.076	5.81318	3.11094	1.26687
393.95	14.2359	9.05258	5.79747	3.10253	1.26329
394.17	14.1974	9.02811	5.78108	3.09376	1.25987
394.4	14.1573	9.0026	5.76475	3.08502	1.25631
394.62	14.119	8.97827	5.74916	3.07668	1.25292
394.84	14.0809	8.954	5.73292	3.06799	1.24938
395.09	14.0376	8.9287	5.71672	3.06007	1.24585
395.31	13.9997	8.90456	5.70127	3.05142	1.24248
395.54	13.9601	8.8794	5.68586	3.04318	1.23897
395.76	13.9224	8.8554	5.67049	3.03458	1.23562
395.99	13.883	8.83037	5.65446	3.026	1.23213
396.21	13.8455	8.8065	5.63918	3.01782	1.22865
396.44	13.8064	8.7827	5.62393	3.00929	1.22517
396.66	13.7691	8.75896	5.60804	3.00116	1.22186
396.89	13.7302	8.73421	5.59219	2.99305	1.21841
397.11	13.693	8.7106	5.57708	2.98459	1.21497
397.34	13.6543	8.68598	5.56132	2.97652	1.21168
397.56	13.6174	8.6625	5.54629	2.96811	1.20841
397.78	13.5806	8.63909	5.53129	2.95972	1.20499
398.01	13.5423	8.61468	5.51566	2.95172	1.20159
398.23	13.5056	8.59139	5.50075	2.94374	1.19834
398.46	13.4675	8.56711	5.48521	2.93543	1.19495
398.68	13.4311	8.54395	5.47038	2.92749	1.19158
398.91	13.3931	8.51981	5.45493	2.91922	1.18821
399.13	13.3569	8.49678	5.44018	2.91133	1.18485
399.35	13.3208	8.47277	5.42481	2.9031	1.18165
399.58	13.2832	8.44987	5.41014	2.89525	1.17831
399.81	13.2456	8.42703	5.39486	2.88707	1.17512
400.03	13.2098	8.40425	5.38027	2.87927	1.1718
400.25	13.1741	8.3805	5.36507	2.87113	1.16849
400.48	13.1369	8.35785	5.35057	2.86337	1.16519
400.7	13.1014	8.33423	5.33545	2.85563	1.16204
400.93	13.0644	8.3117	5.32102	2.84756	1.15876
401.15	13.0291	8.28821	5.30599	2.83986	1.15562
401.38	12.9922	8.26479	5.29165	2.83184	1.15236
401.6	12.9571	8.24245	5.27669	2.82419	1.1491
401.84	12.9189	8.21916	5.26243	2.81655	1.146
402.07	12.8824	8.19593	5.24756	2.80859	1.14276
402.29	12.8476	8.17479	5.23337	2.801	1.13967
402.51	12.8129	8.15169	5.21859	2.79309	1.13645
402.74	12.7767	8.12965	5.20448	2.78554	1.13324
402.96	12.7421	8.10668	5.19041	2.77801	1.13017
403.19	12.7061	8.08477	5.17638	2.77016	1.12698
403.41	12.6718	8.06192	5.16175	2.76233	1.12393
403.64	12.636	8.04013	5.1478	2.75486	1.12076
403.86	12.6018	8.01741	5.13325	2.74708	1.11759
404.09	12.5662	7.99574	5.11938	2.73999	1.11443
404.31	12.5322	7.97412	5.10491	2.73224	1.11142
404.53	12.4983	7.95159	5.09111	2.72452	1.10828
404.76	12.463	7.9301	5.07735	2.71716	1.10528
404.98	12.4293	7.90769	5.06238	2.70981	1.10216
405.2	12.3957	7.88631	5.04932	2.70249	1.09918
405.43	12.3607	7.86499	5.03505	2.69485	1.09594
405.65	12.3273	7.84277	5.02082	2.68724	1.09284
405.89	12.291	7.82157	5.00725	2.67997	1.08989
406.12	12.2562	7.80043	4.99371	2.67273	1.08681
406.35	12.2216	7.77838	4.98022	2.66518	1.08387
406.57	12.1886	7.75736	4.96553	2.65765	1.08081
406.79	12.1556	7.73639	4.9515	2.65046	1.07762
407.01	12.1227	7.71453	4.93812	2.6433	1.07471
407.24	12.0885	7.69367	4.92416	2.63583	1.07154
407.47	12.0543	7.67193	4.91085	2.6287	1.06851
407.69	12.0217	7.6512	4.89697	2.62128	1.06562
407.91	11.9893	7.62864	4.88374	2.61419	1.06261
408.14	11.9554	7.60802	4.86994	2.60712	1.05961
408.36	11.9231	7.58652	4.85677	2.59976	1.05662
408.59	11.8894	7.56601	4.84305	2.59273	1.05363
408.82	11.8558	7.54556	4.82996	2.5854	1.05078
409.04	11.8237	7.52424	4.81631	2.57841	1.04781
409.26	11.7918	7.50297	4.80329	2.57113	1.04498
409.49	11.7584	7.48269	4.79031	2.56418	1.04203
409.71	11.7267	7.46247	4.77677	2.55693	1.03908
409.94	11.6935	7.44138	4.76386	2.55002	1.03615
410.16	11.6619	7.42126	4.7504	2.54313	1.03335
410.38	11.6304	7.40029	4.73756	2.53594	1.03043
410.6	11.5989	7.37847	4.72475	2.52877	1.02764
410.83	11.5662	7.36034	4.7114	2.52194	1.02474
411.05	11.5349	7.33954	4.69866	2.51481	1.02184
411.27	11.5037	7.3188	4.68539	2.50801	1.01908
411.5	11.4712	7.29902	4.67272	2.50124	1.01607
411.73	11.4388	7.27839	4.65952	2.49417	1.01333
411.95	11.4079	7.25872	4.64692	2.48743	1.01046
412.18	11.3756	7.2391	4.63379	2.4807	1.00761
412.4	11.3449	7.21864	4.62126	2.47369	1.00476
412.62	11.3142	7.19913	4.60877	2.4667	1.00192
412.85	11.2823	7.17878	4.59575	2.46003	0.999214
413.08	11.2504	7.15938	4.58333	2.45308	0.996391
413.3	11.22	7.14003	4.57038	2.44645	0.993698
413.52	11.1896	7.11985	4.55746	2.43984	0.99089
413.75	11.158	7.10061	4.54514	2.43294	0.98809
413.98	11.1265	7.08054	4.53285	2.42637	0.985419
414.2	11.0964	7.0614	4.52005	2.41951	0.982634
414.43	11.0651	7.04231	4.50783	2.41267	0.979978
414.65	11.0351	7.02241	4.49509	2.40615	0.977209
414.88	11.004	7.00257	4.48294	2.39965	0.974447
415.1	10.9742	6.98278	4.47082	2.39287	0.971813
415.32	10.9446	6.96391	4.45819	2.3864	0.969067
415.55	10.9136	6.94423	4.44614	2.37966	0.966448
415.79	10.8814	6.92546	4.43357	2.37322	0.963717
416	10.8534	6.90674	4.42159	2.36681	0.960875
416.22	10.824	6.88722	4.40855	2.36012	0.958278
416.44	10.7948	6.86776	4.39718	2.35374	0.95557
416.67	10.7643	6.84919	4.38529	2.34709	0.952987
416.89	10.7352	6.83068	4.3729	2.34074	0.950294
417.11	10.7062	6.81222	4.36108	2.33413	0.947609
417.34	10.6759	6.79297	4.34875	2.32782	0.944931
417.56	10.647	6.7746	4.337	2.32124	0.942377
417.79	10.617	6.75546	4.32474	2.31497	0.939598
418.01	10.5883	6.7372	4.31305	2.30871	0.936943
418.24	10.5583	6.71899	4.30087	2.30219	0.93441
418.46	10.5298	6.7	4.28924	2.29568	0.93177
418.69	10.5	6.68189	4.27712	2.28948	0.929251
418.91	10.4717	6.66383	4.26503	2.28329	0.926625
419.14	10.4421	6.645	4.2535	2.27684	0.924007
419.36	10.4138	6.62704	4.24201	2.27068	0.921396
419.58	10.3857	6.60831	4.23002	2.26426	0.918905
419.81	10.3563	6.59045	4.21859	2.25814	0.916309
420.03	10.3284	6.57263	4.20666	2.25176	0.913832
420.25	10.3004	6.55487	4.19529	2.24568	0.911249
420.48	10.2713	6.53634	4.18395	2.23933	0.908674
420.7	10.2436	6.51867	4.17213	2.23328	0.906107
420.92	10.2159	6.50025	4.16085	2.22724	0.903657
421.15	10.187	6.48268	4.14909	2.22095	0.901104
421.37	10.1595	6.46436	4.13788	2.21494	0.898668
421.6	10.1308	6.4461	4.12619	2.20868	0.896018
421.82	10.1034	6.42867	4.11503	2.20271	0.893596
422.04	10.0761	6.4113	4.10391	2.19649	0.891071
422.27	10.0476	6.39397	4.09231	2.19055	0.888663
422.49	10.0204	6.3759	4.08125	2.18436	0.886151
422.72	9.99212	6.35866	4.06972	2.17846	0.883756
422.94	9.96511	6.34069	4.05872	2.17257	0.88115
423.16	9.93817	6.32355	4.04725	2.1667	0.878768
423.39	9.91009	6.30569	4.03631	2.16057	0.876285
423.62	9.88208	6.28864	4.0254	2.15473	0.873917
423.84	9.85537	6.27164	4.01452	2.14864	0.871447
424.07	9.82752	6.25469	4.00317	2.14152	0.868985
424.29	9.80096	6.23701	3.99186	2.13678	0.866636
424.51	9.77446	6.21863	3.98107	2.13101	0.864187
424.74	9.74684	6.20105	3.97031	2.12498	0.861745
424.98	9.7181	6.18429	3.95909	2.11898	0.859415
425.2	9.69184	6.16757	3.94839	2.11325	0.856987
425.43	9.66445	6.1509	3.93723	2.10754	0.85467
425.65	9.63832	6.13352	3.92659	2.10158	0.852255
425.88	9.61109	6.11694	3.91549	2.09564	0.849847
426.1	9.58511	6.09966	3.90491	2.08998	0.84755
426.33	9.55802	6.08317	3.89387	2.08433	0.845155
426.55	9.53219	6.06672	3.88335	2.07844	0.84287
426.77	9.50642	6.04958	3.87237	2.07282	0.840488
427	9.47956	6.03323	3.86191	2.06697	0.838113
427.22	9.45393	6.01692	3.85099	2.06138	0.835745
427.45	9.42722	5.99992	3.84058	2.05555	0.833486
427.67	9.40174	5.9837	3.82973	2.05	0.831233
427.89	9.37632	5.96679	3.81938	2.0442	0.82868
428.12	9.34983	5.95066	3.80859	2.03868	0.82644
428.34	9.32455	5.93385	3.79829	2.03317	0.824105
428.56	9.29935	5.91781	3.78802	2.02742	0.821776
428.79	9.27307	5.90181	3.77779	2.02194	0.819554
429.01	9.248	5.88513	3.76711	2.01623	0.817339
429.24	9.22187	5.8685	3.75693	2.01078	0.815029
429.46	9.19694	5.85264	3.74631	2.0051	0.812726
429.68	9.17208	5.83682	3.73618	1.99968	0.81053
429.91	9.14616	5.81961	3.72563	1.99403	0.808239
430.13	9.12144	5.80316	3.71556	1.98864	0.805955
430.36	9.09567	5.78748	3.70551	1.98326	0.803777
430.58	9.07108	5.77183	3.69504	1.9779	0.801505
430.81	9.04545	5.75552	3.6846	1.97231	0.799339
431.03	9.021	5.73997	3.67464	1.96674	0.796982
431.25	8.99661	5.72375	3.66471	1.96142	0.794828
431.48	8.97119	5.70827	3.65435	1.95612	0.792582
431.7	8.94694	5.69214	3.64402	1.95059	0.790439
431.92	8.92275	5.67676	3.63417	1.94532	0.788206
432.14	8.89863	5.66141	3.62435	1.93982	0.786075
432.37	8.87349	5.64611	3.61411	1.93434	0.783854
432.6	8.84841	5.63015	3.60434	1.92911	0.781639
432.82	8.8245	5.61494	3.5946	1.9239	0.779526
433.05	8.79956	5.59907	3.58444	1.91846	0.777323
433.27	8.77577	5.58393	3.57431	1.91327	0.775222
433.49	8.75205	5.56884	3.56465	1.90787	0.773031
433.72	8.72732	5.5531	3.55501	1.90271	0.770942
433.94	8.70373	5.53741	3.54497	1.89733	0.768763
434.18	8.67807	5.52244	3.53539	1.8922	0.766591
434.4	8.65461	5.50752	3.52539	1.88686	0.764519
434.62	8.63122	5.49195	3.51587	1.88176	0.762358
434.85	8.60683	5.47643	3.50593	1.87644	0.760297
435.07	8.58356	5.46163	3.49645	1.87137	0.758149
435.3	8.5593	5.4462	3.487	1.86631	0.756007
435.52	8.53617	5.43081	3.47715	1.86104	0.753963
435.74	8.51309	5.41613	3.46775	1.856	0.751833
435.97	8.48904	5.40149	3.45838	1.85076	0.7498
436.2	8.46505	5.38622	3.4486	1.84576	0.747682
436.42	8.44217	5.37166	3.43928	1.84054	0.745569
436.64	8.41935	5.35649	3.42956	1.83557	0.743462
436.86	8.39659	5.34201	3.42029	1.83038	0.741452
437.09	8.37286	5.32757	3.41063	1.82521	0.739357
437.32	8.3492	5.31251	3.40141	1.82027	0.737359
437.53	8.32766	5.29815	3.3918	1.81535	0.735275
437.76	8.30413	5.28318	3.38138	1.81022	0.733287
437.98	8.28168	5.2689	3.37348	1.80533	0.731215
438.2	8.25929	5.25466	3.36395	1.80023	0.729149
438.43	8.23595	5.23981	3.35486	1.79536	0.727178
438.65	8.21369	5.22564	3.34538	1.79051	0.725123
438.88	8.19048	5.21088	3.33634	1.78545	0.723163
439.1	8.16834	5.19679	3.32691	1.7804	0.72112
439.32	8.14626	5.18274	3.31791	1.77559	0.719082
439.55	8.12324	5.1681	3.30854	1.77079	0.71705
439.77	8.10128	5.15413	3.2996	1.76579	0.715112
439.99	8.07939	5.1402	3.29068	1.76102	0.713179
440.22	8.05655	5.12567	3.28138	1.75604	0.711163
440.45	8.03379	5.11182	3.27251	1.75108	0.709241
440.67	8.01207	5.09737	3.26326	1.74634	0.707237
440.89	7.99041	5.08359	3.25444	1.74141	0.705238
441.11	7.96882	5.06985	3.24524	1.7367	0.703332
441.34	7.9463	5.05553	3.23647	1.73179	0.701344
441.56	7.92482	5.04186	3.22733	1.72711	0.699449
441.78	7.9034	5.02823	3.2186	1.72223	0.697472
442	7.88203	5.01402	3.2099	1.71737	0.695501
442.21	7.86169	5.00047	3.20083	1.71272	0.693536
442.43	7.84044	4.98634	3.19179	1.70788	0.691576
442.65	7.81925	4.97286	3.18316	1.70327	0.689622
442.86	7.79907	4.95942	3.17455	1.69845	0.687673
443.09	7.77703	4.94601	3.16558	1.69386	0.68573
443.31	7.75601	4.93204	3.15703	1.68887	0.683876
443.53	7.73505	4.9187	3.14811	1.6843	0.681944
443.75	7.71414	4.9048	3.1396	1.67954	0.6801
443.97	7.69329	4.89094	3.13072	1.6748	0.678179
444.19	7.67249	4.87772	3.12226	1.67027	0.676345
444.42	7.65081	4.86454	3.11344	1.66555	0.674434
444.64	7.63013	4.85079	3.10502	1.66105	0.672611
444.86	7.6095	4.83768	3.09663	1.65635	0.670628
445.08	7.58893	4.82401	3.08788	1.65188	0.668733
445.31	7.56749	4.81097	3.07953	1.64721	0.666925
445.53	7.54703	4.79797	3.07083	1.64276	0.665041
445.75	7.52663	4.78441	3.06253	1.63832	0.663161
445.98	7.50537	4.77148	3.05387	1.63369	0.661369
446.2	7.48508	4.75799	3.04562	1.62927	0.6595
446.42	7.46484	4.74513	3.03739	1.62487	0.657636
446.65	7.44375	4.73172	3.0288	1.62028	0.655859
446.87	7.42363	4.71893	3.02062	1.6159	0.654005
447.1	7.40265	4.7056	3.01208	1.61133	0.652238
447.32	7.38264	4.6923	3.00394	1.60678	0.650394
447.54	7.36269	4.67962	2.99545	1.60243	0.648636
447.76	7.34278	4.66639	2.98735	1.5979	0.646803
[truncated: 653 more rows]
