# Supplementary material
Source: Research Square preprint supplement (doi:10.21203/rs.3.rs-6009404/v1)
Supplement: Supplementary file 4 [file 1640342e18577993125ed791.xlsx]

## Sheet: stiff_vs_soft_LFC0.585
stiff_vs_soft_Log2FC 0.585 (GSC MES20)
	baseMean	log2FoldChange	lfcSE	stat	pvalue	padj	gene_name	group	log10(padj)
ENSG00000115461	32327.2	1.60948	0.0295136	54.5336	0	0	IGFBP5	up	Inf
ENSG00000128342	10531.9	2.28523	0.0291856	78.3001	0	0	LIF	up	Inf
ENSG00000100345	12525.3	1.11499	0.0294606	37.8467	0	0	MYH9	up	Inf
ENSG00000142627	7111.27	1.5278	0.032336	47.2477	0	0	EPHA2	up	Inf
ENSG00000135046	6455.08	3.08738	0.0388561	79.4565	0	0	ANXA1	up	Inf
ENSG00000076706	5900.61	1.3266	0.0349428	37.9649	0	0	MCAM	up	Inf
ENSG00000106366	5875.71	3.90674	0.0431172	90.6075	0	0	SERPINE1	up	Inf
ENSG00000006327	4531.4	1.95289	0.0420101	46.4862	0	0	TNFRSF12A	up	Inf
ENSG00000026508	2684.67	1.65403	0.043936	37.6463	0	0	CD44	up	Inf
ENSG00000142871	1998.28	4.93184	0.0868212	56.8046	0	0	CYR61	up	Inf
ENSG00000137801	1971.27	2.39285	0.0549951	43.5102	0	0	THBS1	up	Inf
ENSG00000145390	1721.26	2.23775	0.0573026	39.0514	0	0	USP53	up	Inf
ENSG00000154678	3218.15	1.55756	0.0419149	37.1601	3.01128e-302	1.92944e-299	PDE1C	up	298.715
ENSG00000091129	3492.19	1.36644	0.0389111	35.117	3.71433e-270	2.10531e-267	NRCAM	up	266.677
ENSG00000120738	6260.67	1.23903	0.035484	34.9181	3.95224e-267	2.15719e-264	EGR1	up	263.666
ENSG00000177469	9527.62	1.01881	0.0296939	34.3103	5.50426e-258	2.79711e-255	CAVIN1	up	254.553
ENSG00000101670	1997.54	1.70216	0.0514106	33.1092	2.19289e-240	9.79293e-238	LIPG	up	237.009
ENSG00000135424	10697.3	1.01706	0.0310761	32.728	6.23842e-235	2.70399e-232	ITGA7	up	231.568
ENSG00000115758	10071.5	0.995009	0.0312892	31.8004	6.38603e-222	2.61419e-219	ODC1	up	218.583
ENSG00000072110	6167.34	1.01144	0.0318377	31.7685	1.76314e-221	7.02253e-219	ACTN1	up	218.154
ENSG00000173917	3430.96	1.3257	0.0419129	31.6298	1.43607e-219	5.56932e-217	HOXB2	up	216.254
ENSG00000153904	3570.06	1.20415	0.0386818	31.1295	9.60974e-213	3.54047e-210	DDAH1	up	209.451
ENSG00000168502	2371.88	1.44679	0.0465016	31.1126	1.6244e-212	5.83873e-210	MTCL1	up	209.234
ENSG00000130707	2834.45	1.32554	0.0433177	30.6005	1.2037e-205	4.12533e-203	ASS1	up	202.385
ENSG00000170439	2962	1.29404	0.0425676	30.3996	5.56506e-203	1.86391e-200	METTL7B	up	199.73
ENSG00000168615	10694.4	0.936289	0.0309041	30.2966	1.27257e-201	4.16751e-199	ADAM9	up	198.38
ENSG00000075426	3931.94	1.22086	0.0405202	30.1297	1.98071e-199	6.34558e-197	FOSL2	up	196.198
ENSG00000114019	753.487	2.45229	0.0814172	30.1201	2.64661e-199	8.29852e-197	AMOTL2	up	196.081
ENSG00000151835	4330.72	1.16263	0.0391052	29.7308	3.06996e-194	9.42542e-192	SACS	up	191.026
ENSG00000110092	4137.95	1.09699	0.0370563	29.6033	1.35536e-192	4.0763e-190	CCND1	up	189.39
ENSG00000103257	6914.76	1.10184	0.0372334	29.5928	1.84905e-192	5.44989e-190	SLC7A5	up	189.264
ENSG00000134531	2512.48	1.25038	0.0429983	29.0797	6.48422e-186	1.76959e-183	EMP1	up	182.752
ENSG00000147526	8384.42	0.95287	0.0329625	28.9077	9.55093e-184	2.55913e-181	TACC1	up	180.592
ENSG00000196924	38119.3	0.815489	0.0282873	28.8289	9.33072e-183	2.45548e-180	FLNA	up	179.61
ENSG00000159840	9668.13	0.889868	0.0311073	28.6064	5.59277e-180	1.39696e-177	ZYX	up	176.855
ENSG00000101361	10059.3	0.799067	0.0281468	28.3892	2.74685e-177	6.74673e-175	NOP56	up	174.171
ENSG00000105281	7183.36	1.01683	0.0359373	28.2944	4.04645e-176	9.77583e-174	SLC1A5	up	173.01
ENSG00000101057	3787.07	1.06063	0.0375686	28.2318	2.38309e-175	5.57453e-173	MYBL2	up	172.254
ENSG00000171951	42632.2	0.827754	0.0293847	28.1696	1.3809e-174	3.17973e-172	SCG2	up	171.498
ENSG00000146950	4183.25	1.0275	0.0366109	28.0655	2.58147e-173	5.7641e-171	SHROOM2	up	170.239
ENSG00000041982	26025.1	0.832321	0.0297246	28.0011	1.57504e-172	3.41344e-170	TNC	up	169.467
ENSG00000065320	3538.34	1.22065	0.0436987	27.9332	1.05377e-171	2.25064e-169	NTN1	up	168.648
ENSG00000108829	5916.93	0.880805	0.0322338	27.3255	2.114e-164	4.26768e-162	LRRC59	up	161.37
ENSG00000168824	1305.68	1.57903	0.0585424	26.9723	3.11994e-160	6.21333e-158	NSG1	up	157.207
ENSG00000169710	26568.6	0.816564	0.0304505	26.8161	2.09702e-158	4.06628e-156	FASN	up	155.391
ENSG00000204394	9450.29	0.789974	0.0297158	26.5843	1.03172e-155	1.9746e-153	VARS	up	152.705
ENSG00000116285	2670.44	1.16296	0.0438854	26.5	9.70379e-155	1.83339e-152	ERRFI1	up	151.737
ENSG00000126562	415.804	3.59107	0.135849	26.4342	5.53843e-154	1.02025e-151	WNK4	up	150.991
ENSG00000186575	2567.2	1.20313	0.0457327	26.3079	1.55629e-152	2.83148e-150	NF2	up	149.548
ENSG00000116649	4078.31	0.932469	0.0357628	26.0737	7.24705e-150	1.30244e-147	SRM	up	146.885
ENSG00000132507	12374.5	0.778312	0.0298707	26.056	1.14921e-149	2.04046e-147	EIF5A	up	146.69
ENSG00000160957	5700.51	0.914588	0.0360621	25.3615	6.71685e-142	1.13777e-139	RECQL4	up	138.944
ENSG00000163545	956.606	1.83471	0.0725393	25.2927	3.84657e-141	6.44169e-139	NUAK2	up	138.191
ENSG00000103888	3438.55	1.00701	0.0403107	24.9812	9.79179e-138	1.60335e-135	CEMIP	up	134.795
ENSG00000196230	37368.5	0.623568	0.0249807	24.9619	1.58419e-137	2.56552e-135	TUBB	up	134.591
ENSG00000166482	2916.25	1.06233	0.0425739	24.9526	1.99958e-137	3.20303e-135	MFAP4	up	134.494
ENSG00000080824	39155.3	0.59688	0.0239266	24.9463	2.33935e-137	3.70698e-135	HSP90AA1	up	134.431
ENSG00000177697	10385.1	0.728696	0.0292441	24.9177	4.7806e-137	7.49485e-135	CD151	up	134.125
ENSG00000132382	4203.37	0.903844	0.0363832	24.8423	3.13091e-136	4.85686e-134	MYBBP1A	up	133.314
ENSG00000174791	2566.58	1.17763	0.0476332	24.7229	6.07297e-135	9.32264e-133	RIN1	up	132.03
ENSG00000159200	1834.53	1.29258	0.0522904	24.7193	6.63515e-135	1.00806e-132	RCAN1	up	131.997
ENSG00000184216	6099.72	0.799055	0.0324929	24.5917	1.55162e-133	2.28662e-131	IRAK1	up	130.641
ENSG00000176105	4319.19	0.915244	0.0372933	24.5417	5.2986e-133	7.73123e-131	YES1	up	130.112
ENSG00000180801	1599.8	1.29864	0.0531032	24.455	4.45548e-132	6.4373e-130	ARSJ	up	129.191
ENSG00000115641	682.617	2.03605	0.0838912	24.2701	4.05431e-130	5.74503e-128	FHL2	up	127.241
ENSG00000035403	3790.84	0.933517	0.0386362	24.1617	5.62626e-129	7.67724e-127	VCL	up	126.115
ENSG00000149295	3953.92	0.950024	0.0393308	24.1547	6.65899e-129	9.00308e-127	DRD2	up	126.046
ENSG00000166508	14832.6	0.695989	0.0288513	24.1233	1.42346e-128	1.88987e-126	MCM7	up	125.724
ENSG00000108691	2167.47	1.22267	0.0508102	24.0635	6.02864e-128	7.86231e-126	CCL2	up	125.104
ENSG00000171877	1332.39	1.35233	0.0563812	23.9854	3.94874e-127	5.10461e-125	FRMD5	up	124.292
ENSG00000103187	5649.85	0.90294	0.037824	23.8722	5.9632e-126	7.64171e-124	COTL1	up	123.117
ENSG00000150687	554.334	2.1618	0.0915872	23.6037	3.52781e-123	4.44354e-121	PRSS23	up	120.352
ENSG00000197586	4411.75	0.833113	0.0353335	23.5785	6.39848e-123	7.99106e-121	ENTPD6	up	120.097
ENSG00000205542	45939.4	0.780844	0.0332221	23.5037	3.73705e-122	4.62797e-120	TMSB4X	up	119.335
ENSG00000134871	15878.5	0.705537	0.030134	23.4133	3.12867e-121	3.84227e-119	COL4A2	up	118.415
ENSG00000128564	3953.15	1.10992	0.0474372	23.3977	4.50996e-121	5.49283e-119	VGF	up	118.26
ENSG00000130164	8865.13	0.74496	0.0318618	23.381	6.66796e-121	8.05457e-119	LDLR	up	118.094
ENSG00000103966	1025.47	1.48474	0.0635056	23.3797	6.87763e-121	8.2403e-119	EHD4	up	118.084
ENSG00000123700	336.19	3.21859	0.137896	23.3407	1.71269e-120	2.0192e-118	KCNJ2	up	117.695
ENSG00000116717	6016.53	0.828969	0.0357599	23.1815	6.99364e-119	7.98956e-117	GADD45A	up	116.097
ENSG00000144381	11685.4	0.632669	0.0273282	23.1508	1.42769e-118	1.61845e-116	HSPD1	up	115.791
ENSG00000136295	25000.4	0.659351	0.0286078	23.048	1.54119e-117	1.72065e-115	TTYH3	up	114.764
ENSG00000168268	7064.25	0.731187	0.0318624	22.9482	1.53461e-116	1.68773e-114	NT5DC2	up	113.773
ENSG00000129474	2375.08	1.0308	0.0449803	22.9168	3.16146e-116	3.42577e-114	AJUBA	up	113.465
ENSG00000163638	5145.16	0.857909	0.0375205	22.8651	1.03518e-115	1.10547e-113	ADAMTS9	up	112.956
ENSG00000276043	7702.29	0.746056	0.032636	22.8599	1.16432e-115	1.23443e-113	UHRF1	up	112.909
ENSG00000057019	2452.38	1.01104	0.0443241	22.8102	3.63293e-115	3.82418e-113	DCBLD2	up	112.417
ENSG00000176619	14811.1	0.690179	0.0302903	22.7855	6.38506e-115	6.67352e-113	LMNB2	up	112.176
ENSG00000151474	1845.18	1.3215	0.0579989	22.7849	6.46796e-115	6.71256e-113	FRMD4A	up	112.173
ENSG00000151012	1001.02	1.49016	0.0656692	22.6918	5.39464e-114	5.5595e-112	SLC7A11	up	111.255
ENSG00000106105	11205.2	0.659317	0.0290679	22.6819	6.75806e-114	6.91622e-112	GARS	up	111.16
ENSG00000167553	8172.39	0.890836	0.0393474	22.6402	1.74086e-113	1.76931e-111	TUBA1C	up	110.752
ENSG00000171848	1644.36	1.19146	0.0528308	22.5524	1.27205e-112	1.28399e-110	RRM2	up	109.891
ENSG00000178921	3980.9	0.891602	0.0395558	22.5404	1.66953e-112	1.67374e-110	PFAS	up	109.776
ENSG00000188916	1718.18	1.16867	0.0518527	22.5382	1.75152e-112	1.74407e-110	INSYN2	up	109.758
ENSG00000033867	2197.68	1.02824	0.0458639	22.4193	2.5491e-111	2.48782e-109	SLC4A7	up	108.604
ENSG00000164099	1659.51	1.28985	0.0577143	22.3489	1.23846e-110	1.19289e-108	PRSS12	up	107.923
ENSG00000196365	9256.85	0.721623	0.0323414	22.3127	2.78414e-110	2.66427e-108	LONP1	up	107.574
ENSG00000115053	15943.6	0.6806	0.0305298	22.2929	4.32663e-110	4.11365e-108	NCL	up	107.386
ENSG00000253729	9234.35	0.740755	0.0333638	22.2024	3.25627e-109	3.03719e-107	PRKDC	up	106.518
ENSG00000128567	13096	0.68915	0.0310989	22.1599	8.37221e-109	7.71133e-107	PODXL	up	106.113
ENSG00000113070	915.89	1.60465	0.0724749	22.1407	1.28115e-108	1.17269e-106	HBEGF	up	105.931
ENSG00000135404	23018.6	0.655053	0.0296137	22.1199	2.03183e-108	1.84834e-106	CD63	up	105.733
ENSG00000157110	2680.46	0.923133	0.0418369	22.065	6.85289e-108	6.19577e-106	RBPMS	up	105.208
ENSG00000150938	2603.93	0.917828	0.0416491	22.0371	1.26913e-107	1.14043e-105	CRIM1	up	104.943
ENSG00000151276	2616.21	1.02967	0.0467292	22.0348	1.33769e-107	1.19476e-105	MAGI1	up	104.923
ENSG00000146670	3953.14	0.892776	0.0405582	22.0122	2.19974e-107	1.95287e-105	CDCA5	up	104.709
ENSG00000198887	4653.79	0.866324	0.0394663	21.951	8.48012e-107	7.48332e-105	SMC5	up	104.126
ENSG00000156802	5394.47	0.791488	0.036103	21.9231	1.56543e-106	1.3732e-104	ATAD2	up	103.862
ENSG00000103335	3881.12	0.871341	0.0397682	21.9105	2.06362e-106	1.7995e-104	PIEZO1	up	103.745
ENSG00000139793	673.518	1.79639	0.0822495	21.8407	9.52967e-106	8.21279e-104	MBNL2	up	103.086
ENSG00000160949	4417.82	0.822422	0.0376795	21.8268	1.29187e-105	1.10048e-103	TONSL	up	102.958
ENSG00000107249	1233.83	1.28261	0.0588452	21.7964	2.51242e-105	2.1279e-103	GLIS3	up	102.672
ENSG00000166025	5688.51	0.803315	0.0370919	21.6574	5.17156e-104	4.30584e-102	AMOTL1	up	101.366
ENSG00000127564	1411.2	1.34005	0.0620541	21.5949	2.00539e-103	1.6603e-101	PKMYT1	up	100.78
ENSG00000130816	10091.7	0.641869	0.030043	21.365	2.82725e-101	2.30194e-99	DNMT1	up	98.6379
ENSG00000197451	8128.08	0.660459	0.0309492	21.3401	4.8163e-101	3.87857e-99	HNRNPAB	up	98.4113
ENSG00000205213	6234.84	0.678699	0.0318325	21.3209	7.26108e-101	5.81557e-99	LGR4	up	98.2354
ENSG00000196305	6757.86	0.711889	0.0334243	21.2986	1.17088e-100	9.27703e-99	IARS	up	98.0326
ENSG00000075213	1917.18	1.06964	0.0502253	21.2968	1.21421e-100	9.56887e-99	SEMA3A	up	98.0191
ENSG00000110880	6162.67	0.690548	0.0325639	21.2059	8.41856e-100	6.59916e-98	CORO1C	up	97.1805
ENSG00000175040	4322.71	0.868927	0.0411185	21.1323	4.01806e-99	3.13302e-97	CHST2	up	96.504
ENSG00000104885	6613.05	0.723474	0.0343034	21.0904	9.73554e-99	7.55119e-97	DOT1L	up	96.122
ENSG00000100994	13026	0.604204	0.0286501	21.089	1.00268e-98	7.7364e-97	PYGB	up	96.1115
ENSG00000137054	1814.97	1.05162	0.0499247	21.0641	1.69696e-98	1.30251e-96	POLR1E	up	95.8852
ENSG00000131467	5237.59	0.727374	0.0345461	21.0552	2.04977e-98	1.56515e-96	PSME3	up	95.8054
ENSG00000261236	7283.16	0.738401	0.0351116	21.0301	3.47782e-98	2.64189e-96	BOP1	up	95.5781
ENSG00000170515	4247.71	0.780864	0.0371666	21.0098	5.33311e-98	4.03046e-96	PA2G4	up	95.3946
ENSG00000095319	5497.31	0.729251	0.0347226	21.0022	6.25885e-98	4.70595e-96	NUP188	up	95.3274
ENSG00000109099	4401.52	0.77837	0.0371567	20.9483	1.94511e-97	1.44773e-95	PMP22	up	94.8393
ENSG00000100664	8331.91	0.639399	0.030538	20.9378	2.42408e-97	1.79516e-95	EIF5	up	94.7459
ENSG00000175183	2375.35	1.06156	0.0507744	20.9073	4.59287e-97	3.38425e-95	CSRP2	up	94.4705
ENSG00000137309	9614.18	0.669223	0.0320894	20.855	1.37401e-96	9.97479e-95	HMGA1	up	94.0011
ENSG00000136997	3860.89	0.92654	0.0444547	20.8424	1.78827e-96	1.29185e-94	MYC	up	93.8888
ENSG00000166986	7615.2	0.621026	0.0297984	20.8409	1.84222e-96	1.32433e-94	MARS	up	93.878
ENSG00000138771	2802.56	1.02465	0.0493096	20.78	6.56771e-96	4.69846e-94	SHROOM3	up	93.328
ENSG00000105855	2245.83	0.921914	0.044373	20.7764	7.0699e-96	5.03329e-94	ITGB8	up	93.2981
ENSG00000091136	9170.22	0.606719	0.029255	20.739	1.54249e-95	1.08764e-93	LAMB1	up	92.9635
ENSG00000104635	5559.3	0.713047	0.0344399	20.7041	3.18145e-95	2.23262e-93	SLC39A14	up	92.6512
ENSG00000108424	12456.1	0.622139	0.0301491	20.6354	1.32127e-94	9.22821e-93	KPNB1	up	92.0349
ENSG00000130204	5147.85	0.799663	0.0388585	20.5788	4.24878e-94	2.95351e-92	TOMM40	up	91.5297
ENSG00000198576	6277.86	0.746884	0.0363704	20.5355	1.03738e-93	7.14386e-92	ARC	up	91.1461
ENSG00000075624	142843	0.641241	0.0313232	20.4718	3.8439e-93	2.62257e-91	ACTB	up	90.5813
ENSG00000182199	8365.82	0.598472	0.0292596	20.4538	5.55175e-93	3.75304e-91	SHMT2	up	90.4256
ENSG00000171552	2447.91	0.909433	0.0446757	20.3563	4.08084e-92	2.7336e-90	BCL2L1	up	89.5633
ENSG00000133657	3539.06	0.827595	0.040898	20.2356	4.75862e-91	3.15891e-89	ATP13A3	up	88.5005
ENSG00000127603	21806.1	0.693393	0.034316	20.2061	8.64862e-91	5.66465e-89	MACF1	up	88.2468
ENSG00000144136	4362.27	0.727584	0.0361252	20.1406	3.25334e-90	2.11209e-88	SLC20A1	up	87.6753
ENSG00000139514	4935.31	0.788968	0.0393604	20.0447	2.24401e-89	1.41931e-87	SLC7A1	up	86.8479
ENSG00000182985	1811.43	0.99277	0.0495692	20.0279	3.14353e-89	1.97975e-87	CADM1	up	86.7034
ENSG00000037897	8424.88	0.585216	0.0292334	20.0188	3.77993e-89	2.37042e-87	METTL1	up	86.6252
ENSG00000173404	5414.63	0.67413	0.0337046	20.0012	5.3817e-89	3.3606e-87	INSM1	up	86.4736
ENSG00000139278	895.013	1.37891	0.069254	19.9108	3.27741e-88	2.01246e-86	GLIPR1	up	85.6963
ENSG00000117395	2363.23	0.894888	0.0449499	19.9086	3.43022e-88	2.09756e-86	EBNA1BP2	up	85.6783
ENSG00000138668	7250.1	0.627716	0.0315587	19.8904	4.92407e-88	2.99859e-86	HNRNPD	up	85.5231
ENSG00000094804	2501.41	0.867223	0.0436709	19.8582	9.36931e-88	5.68212e-86	CDC6	up	85.2455
ENSG00000065150	7046.14	0.637041	0.0321242	19.8306	1.62145e-87	9.75317e-86	IPO5	up	85.0109
ENSG00000140525	4006.48	0.74522	0.0378646	19.6812	3.12784e-86	1.8512e-84	FANCI	up	83.7325
ENSG00000114867	13098.3	0.599355	0.0305839	19.597	1.63853e-85	9.65882e-84	EIF4G1	up	83.0151
ENSG00000165732	5656.7	0.7295	0.0372391	19.5896	1.89506e-85	1.11265e-83	DDX21	up	82.9536
ENSG00000120254	2014.59	0.921551	0.0470548	19.5847	2.09036e-85	1.22244e-83	MTHFD1L	up	82.9128
ENSG00000166197	4332.52	0.750261	0.0383331	19.5722	2.67114e-85	1.55591e-83	NOLC1	up	82.808
ENSG00000130826	3058.37	0.846945	0.043566	19.4405	3.50642e-84	2.01852e-82	DKC1	up	81.695
ENSG00000053372	2497.74	0.902554	0.0466542	19.3456	2.22056e-83	1.26349e-81	MRTO4	up	80.8984
ENSG00000165072	1448.07	1.04001	0.0539702	19.27	9.59507e-83	5.41772e-81	MAMDC2	up	80.2662
ENSG00000099901	5911.96	0.652345	0.0339879	19.1935	4.19732e-82	2.33419e-80	RANBP1	up	79.6319
ENSG00000013573	2653.23	0.872387	0.0455247	19.1629	7.54822e-82	4.18189e-80	DDX11	up	79.3786
ENSG00000056558	1091.58	1.17818	0.0615067	19.1553	8.74829e-82	4.8286e-80	TRAF1	up	79.3162
ENSG00000111252	2956.77	0.926745	0.0483815	19.1549	8.80401e-82	4.84122e-80	SH2B3	up	79.315
ENSG00000188229	10596.6	0.651352	0.0340659	19.1203	1.71009e-81	9.33392e-80	TUBB4B	up	79.0299
ENSG00000089159	3698.03	0.706994	0.0372826	18.9631	3.44125e-80	1.85086e-78	PXN	up	77.7326
ENSG00000160072	2468.1	0.884484	0.0467495	18.9197	7.8559e-80	4.20991e-78	ATAD3B	up	77.3757
ENSG00000129250	3395.17	0.713058	0.0377557	18.8861	1.48385e-79	7.8944e-78	KIF1C	up	77.1027
ENSG00000175592	390.927	2.05551	0.109151	18.8318	4.14707e-79	2.19051e-77	FOSL1	up	76.6595
ENSG00000115241	6658.56	0.614004	0.0326191	18.8234	4.85263e-79	2.55404e-77	PPM1G	up	76.5928
ENSG00000112759	2288.71	0.851161	0.0453035	18.788	9.47035e-79	4.93161e-77	SLC29A1	up	76.307
ENSG00000115884	3659.29	0.700378	0.0372873	18.7833	1.03506e-78	5.371e-77	SDC1	up	76.2699
ENSG00000092621	8994.56	0.641777	0.034253	18.7364	2.50143e-78	1.29346e-76	PHGDH	up	75.8882
ENSG00000084774	5426.87	0.645801	0.0345081	18.7145	3.77181e-78	1.94354e-76	CAD	up	75.7114
ENSG00000137310	1242.09	1.11117	0.059607	18.6416	1.47755e-77	7.58697e-76	TCF19	up	75.1199
ENSG00000167670	4266.64	0.744215	0.0399589	18.6245	2.03293e-77	1.03665e-75	CHAF1A	up	74.9844
ENSG00000108561	6579.12	0.61698	0.033177	18.5967	3.42017e-77	1.73206e-75	C1QBP	up	74.7614
ENSG00000132361	4331.65	0.705112	0.038011	18.5502	8.12318e-77	4.08571e-75	CLUH	up	74.3887
ENSG00000138166	2569.14	0.861097	0.0464234	18.5488	8.34295e-77	4.18197e-75	DUSP5	up	74.3786
ENSG00000167900	1757.26	0.95366	0.0515196	18.5106	1.6947e-76	8.409e-75	TK1	up	74.0753
ENSG00000007171	7421.51	0.606678	0.0328532	18.4663	3.85429e-76	1.89969e-74	NOS2	up	73.7213
ENSG00000124762	5837.52	0.614777	0.0335305	18.3349	4.3617e-75	2.10749e-73	CDKN1A	up	72.6762
ENSG00000113013	7985.9	0.592577	0.0323383	18.3243	5.29705e-75	2.55107e-73	HSPA9	up	72.5933
ENSG00000149136	7459.02	0.586411	0.0320219	18.3128	6.53877e-75	3.13882e-73	SSRP1	up	72.5032
ENSG00000123416	28064.6	0.60275	0.0330348	18.2459	2.22954e-74	1.06332e-72	TUBA1B	up	71.9733
ENSG00000065308	2536.9	0.800205	0.044008	18.1832	7.0158e-74	3.32449e-72	TRAM2	up	71.4783
ENSG00000150753	6796.22	0.629599	0.0346856	18.1516	1.24724e-73	5.85367e-72	CCT5	up	71.2326
ENSG00000066117	4156.23	0.634457	0.0350147	18.1198	2.22592e-73	1.04138e-71	SMARCD1	up	70.9824
ENSG00000125885	2380.45	0.82086	0.0454574	18.0578	6.85031e-73	3.17462e-71	MCM8	up	70.4983
ENSG00000101255	1567.14	0.987071	0.0547058	18.0433	8.91182e-73	4.11704e-71	TRIB3	up	70.3854
ENSG00000148154	3651.43	0.697848	0.0387385	18.0143	1.50375e-72	6.92524e-71	UGCG	up	70.1596
ENSG00000110660	1128.53	1.07901	0.0602425	17.911	9.67191e-72	4.38569e-70	SLC35F2	up	69.358
ENSG00000160818	1933.25	0.907966	0.050812	17.8691	2.05174e-71	9.24661e-70	GPATCH4	up	69.034
ENSG00000071539	1026.59	1.14478	0.0640784	17.8653	2.19669e-71	9.83968e-70	TRIP13	up	69.007
ENSG00000070814	2491.39	0.79272	0.044482	17.8211	4.84352e-71	2.14997e-69	TCOF1	up	68.6676
ENSG00000148773	6775.27	0.790499	0.0444131	17.7988	7.21987e-71	3.19517e-69	MKI67	up	68.4955
ENSG00000052749	1656.33	0.932383	0.052421	17.7864	9.00458e-71	3.97307e-69	RRP12	up	68.4009
ENSG00000130766	1710.83	0.884216	0.0499697	17.695	4.57945e-70	1.99667e-68	SESN2	up	67.6997
ENSG00000110108	2215.74	0.80815	0.0456887	17.6882	5.17369e-70	2.2491e-68	TMEM109	up	67.648
ENSG00000104980	3629.88	0.669629	0.0378742	17.6804	5.94159e-70	2.56027e-68	TIMM44	up	67.5917
ENSG00000150990	1971.33	0.83093	0.0472515	17.5853	3.19491e-69	1.35988e-67	DHX37	up	66.8665
ENSG00000120800	1428.13	1.01979	0.0579917	17.5851	3.20199e-69	1.35988e-67	UTP20	up	66.8665
ENSG00000074054	3600.99	0.737962	0.0422157	17.4807	2.00872e-68	8.45788e-67	CLASP1	up	66.0727
ENSG00000017483	1110.6	1.20481	0.068939	17.4765	2.16377e-68	9.08476e-67	SLC38A5	up	66.0417
ENSG00000164741	2223.35	0.795971	0.0456018	17.4548	3.16346e-68	1.32443e-66	DLC1	up	65.878
ENSG00000278540	4278.66	0.668958	0.0383512	17.443	3.89339e-68	1.62541e-66	ACACA	up	65.789
ENSG00000147536	1783.63	0.859687	0.0492867	17.4426	3.91987e-68	1.63184e-66	GINS4	up	65.7873
ENSG00000198176	3000.58	0.702537	0.0404212	17.3804	1.16157e-67	4.82198e-66	TFDP1	up	65.3168
ENSG00000102172	3265.69	0.740402	0.0426068	17.3775	1.22068e-67	5.05312e-66	SMS	up	65.2964
ENSG00000128283	1343.96	1.03105	0.0594525	17.3425	2.24709e-67	9.2501e-66	CDC42EP1	up	65.0339
ENSG00000138074	2249.98	0.765689	0.0442037	17.3218	3.21904e-67	1.31775e-65	SLC5A6	up	64.8802
ENSG00000140105	4476.53	0.591676	0.0341661	17.3176	3.46339e-67	1.41385e-65	WARS	up	64.8496
ENSG00000013619	1714.79	0.868834	0.0502444	17.2922	5.3895e-67	2.17603e-65	MAMLD1	up	64.6623
ENSG00000247077	2719.19	0.699448	0.0404514	17.291	5.49439e-67	2.21232e-65	PGAM5	up	64.6552
ENSG00000111371	5027.49	0.714138	0.0413578	17.2673	8.28994e-67	3.32885e-65	SLC38A1	up	64.4777
ENSG00000165271	1968.66	0.836764	0.0484827	17.259	9.56958e-67	3.83225e-65	NOL6	up	64.4165
ENSG00000128965	856.408	1.24551	0.0722213	17.2458	1.20308e-66	4.80484e-65	CHAC1	up	64.3183
ENSG00000108179	2548.36	0.716306	0.0415749	17.2293	1.60149e-66	6.37871e-65	PPIF	up	64.1953
ENSG00000183853	1473.97	1.00952	0.0585998	17.2273	1.65661e-66	6.58043e-65	KIRREL1	up	64.1817
ENSG00000198431	3927.13	0.643611	0.0373855	17.2155	2.03145e-66	8.04772e-65	TXNRD1	up	64.0943
ENSG00000178999	1531.98	0.934723	0.0544184	17.1766	3.97608e-66	1.56672e-64	AURKB	up	63.805
ENSG00000143786	1658	0.866225	0.0506003	17.119	1.07148e-65	4.19959e-64	CNIH3	up	63.3768
ENSG00000181026	2072	0.803179	0.0469411	17.1103	1.24265e-65	4.84468e-64	AEN	up	63.3147
ENSG00000144554	1471.07	0.939201	0.0549989	17.0767	2.21204e-65	8.60127e-64	FANCD2	up	63.0654
ENSG00000243156	2160.74	0.907935	0.0531845	17.0714	2.42163e-65	9.39148e-64	MICAL3	up	63.0273
ENSG00000197879	2607.83	0.721315	0.0423596	17.0284	5.05779e-65	1.94613e-63	MYO1C	up	62.7108
ENSG00000159788	1407.52	0.964661	0.0567896	16.9866	1.03222e-64	3.95111e-63	RGS12	up	62.4033
ENSG00000152154	3331.87	0.693999	0.0408657	16.9824	1.1084e-64	4.23173e-63	TMEM178A	up	62.3735
ENSG00000073792	1984.45	0.785443	0.0463361	16.951	1.89293e-64	7.2083e-63	IGF2BP2	up	62.1422
ENSG00000152104	2920.25	0.827559	0.0489138	16.9187	3.27544e-64	1.24408e-62	PTPN14	up	61.9052
ENSG00000177084	3795.61	0.648869	0.0383713	16.9103	3.77945e-64	1.43182e-62	POLE	up	61.8441
ENSG00000163811	2360.31	0.742165	0.0439333	16.893	5.06646e-64	1.91447e-62	WDR43	up	61.718
ENSG00000005884	456.728	1.65511	0.0980496	16.8804	6.27443e-64	2.36487e-62	ITGA3	up	61.6262
ENSG00000160193	1219.17	1.00047	0.0592848	16.8756	6.80345e-64	2.55772e-62	WDR4	up	61.5921
ENSG00000142207	2278.55	0.754061	0.0447336	16.8567	9.36664e-64	3.51237e-62	URB1	up	61.4544
ENSG00000091527	3658.44	0.633219	0.0375723	16.8533	9.91529e-64	3.70867e-62	CDV3	up	61.4308
ENSG00000187840	8513.04	0.638132	0.037977	16.8031	2.31617e-63	8.64138e-62	EIF4EBP1	up	61.0634
ENSG00000093009	1569.11	0.908442	0.0541055	16.7902	2.87822e-63	1.07112e-61	CDC45	up	60.9702
ENSG00000100714	5279.24	0.588901	0.0350839	16.7855	3.11647e-63	1.15686e-61	MTHFD1	up	60.9367
ENSG00000138160	2075.45	0.79097	0.0475193	16.6452	3.27706e-62	1.20134e-60	KIF11	up	59.9203
ENSG00000127586	2796.82	0.823421	0.0494786	16.642	3.46064e-62	1.26549e-60	CHTF18	up	59.8977
ENSG00000006530	1642.04	0.875639	0.0527545	16.5984	7.15989e-62	2.60532e-60	AGK	up	59.5841
ENSG00000105011	2698.31	0.739954	0.0445848	16.5965	7.38155e-62	2.67936e-60	ASF1B	up	59.572
ENSG00000120694	3879.81	0.643229	0.0388056	16.5757	1.04501e-61	3.7746e-60	HSPH1	up	59.4231
ENSG00000085999	1008.01	1.08446	0.0654857	16.5603	1.35019e-61	4.85311e-60	RAD54L	up	59.314
ENSG00000105447	2403.35	0.74441	0.0450499	16.5241	2.45983e-61	8.75615e-60	GRWD1	up	59.0577
ENSG00000128228	2516.74	0.730467	0.0443013	16.4886	4.42923e-61	1.56908e-59	SDF2L1	up	58.8044
ENSG00000170779	1814.44	0.836938	0.0507581	16.4887	4.42061e-61	1.56908e-59	CDCA4	up	58.8044
ENSG00000004478	4238.77	0.600391	0.0364194	16.4855	4.66603e-61	1.64505e-59	FKBP4	up	58.7838
ENSG00000184792	1190.45	1.00426	0.0611641	16.4192	1.39429e-60	4.83474e-59	OSBP2	up	58.3156
ENSG00000092853	1226.74	0.937296	0.0571129	16.4113	1.58828e-60	5.49447e-59	CLSPN	up	58.2601
ENSG00000164163	3249.57	0.709081	0.0433143	16.3706	3.1016e-60	1.07045e-58	ABCE1	up	57.9704
ENSG00000171793	2107.5	0.745018	0.0455213	16.3664	3.32568e-60	1.14511e-58	CTPS1	up	57.9412
ENSG00000176890	2185.64	0.8832	0.0540965	16.3264	6.40762e-60	2.18586e-58	TYMS	up	57.6604
ENSG00000090273	4562.95	0.627542	0.038552	16.2778	1.41875e-59	4.81753e-58	NUDC	up	57.3172
ENSG00000180198	2625.29	0.72247	0.0444373	16.2582	1.9546e-59	6.60664e-58	RCC1	up	57.18
ENSG00000165304	2215.02	0.756827	0.0465679	16.2521	2.15778e-59	7.27671e-58	MELK	up	57.1381
ENSG00000120093	3616.34	0.623425	0.0384013	16.2345	2.87669e-59	9.65691e-58	HOXB3	up	57.0152
ENSG00000120437	3748.99	0.6318	0.0390314	16.187	6.23059e-59	2.07269e-57	ACAT2	up	56.6835
ENSG00000161996	1570.23	0.853011	0.052743	16.173	7.8226e-59	2.59643e-57	WDR90	up	56.5856
ENSG00000164045	1112.59	1.0257	0.0634478	16.1661	8.74665e-59	2.89662e-57	CDC25A	up	56.5381
ENSG00000011426	5467.45	0.587404	0.0363812	16.1458	1.21555e-58	4.00749e-57	ANLN	up	56.3971
ENSG00000138119	1262.42	0.955702	0.0593656	16.0986	2.60984e-58	8.54692e-57	MYOF	up	56.0682
ENSG00000069849	3156.09	0.628909	0.039072	16.0962	2.71383e-58	8.86778e-57	ATP1B3	up	56.0522
ENSG00000125266	1486.13	0.899897	0.0559263	16.0908	2.96126e-58	9.6549e-57	EFNB2	up	56.0153
ENSG00000196376	1326.54	0.891116	0.0554911	16.0587	4.96735e-58	1.61242e-56	SLC35F1	up	55.7925
ENSG00000228716	2196.58	0.726285	0.0452493	16.0508	5.64617e-58	1.82874e-56	DHFR	up	55.7378
ENSG00000080608	1618.62	0.807934	0.0504608	16.0111	1.06862e-57	3.44601e-56	PUM3	up	55.4627
ENSG00000173638	2353.05	0.796952	0.0498104	15.9997	1.28343e-57	4.12067e-56	SLC19A1	up	55.385
ENSG00000142230	5374.62	0.598592	0.0375879	15.9251	4.24128e-57	1.34706e-55	SAE1	up	54.8706
ENSG00000278259	2084.23	0.735544	0.046342	15.8721	9.89379e-57	3.12886e-55	MYO19	up	54.5046
ENSG00000085415	2165.48	0.740029	0.0467194	15.8399	1.65193e-56	5.20183e-55	SEH1L	up	54.2838
ENSG00000197785	3243.6	0.643796	0.0406745	15.828	1.9941e-56	6.25257e-55	ATAD3A	up	54.2039
ENSG00000146918	3211.5	0.672608	0.0426356	15.7757	4.57169e-56	1.4274e-54	NCAPG2	up	53.8455
ENSG00000242265	3145.1	0.756859	0.0481327	15.7244	1.02898e-55	3.19243e-54	PEG10	up	53.4959
ENSG00000122952	1919.95	0.734547	0.0467217	15.7218	1.07313e-55	3.32242e-54	ZWINT	up	53.4785
ENSG00000111206	2735.75	0.821569	0.0525056	15.6473	3.46728e-55	1.06898e-53	FOXM1	up	52.971
ENSG00000112159	2016.92	0.739421	0.0472947	15.6343	4.2495e-55	1.30741e-53	MDN1	up	52.8836
ENSG00000073111	3438.89	0.604543	0.0387361	15.6067	6.55388e-55	2.00799e-53	MCM2	up	52.6972
ENSG00000221968	1497.18	0.838604	0.0537731	15.5952	7.84316e-55	2.39306e-53	FADS3	up	52.621
ENSG00000110619	4226.2	0.597232	0.0385089	15.5089	3.01842e-54	9.09661e-53	CARS	up	52.0411
ENSG00000186185	1836.21	0.788539	0.0509539	15.4755	5.07598e-54	1.52042e-52	KIF18B	up	51.818
ENSG00000075702	1695.94	0.888183	0.0574027	15.4728	5.29289e-54	1.58218e-52	WDR62	up	51.8007
ENSG00000107554	1550.68	0.790677	0.0511262	15.4652	5.95945e-54	1.77782e-52	DNMBP	up	51.7501
ENSG00000080573	127.574	4.23202	0.273723	15.461	6.3625e-54	1.89423e-52	COL5A3	up	51.7226
ENSG00000143878	5827.66	0.654035	0.042346	15.445	8.15243e-54	2.41735e-52	RHOB	up	51.6167
ENSG00000149948	514.531	1.3274	0.0862923	15.3826	2.14312e-53	6.32928e-52	HMGA2	up	51.1986
ENSG00000134954	1430.62	0.857398	0.0557923	15.3677	2.69743e-53	7.91874e-52	ETS1	up	51.1013
ENSG00000154127	3198.55	0.689836	0.0449532	15.3456	3.7881e-53	1.10764e-51	UBASH3B	up	50.9556
ENSG00000171241	1218.64	0.867869	0.0566328	15.3245	5.24592e-53	1.52484e-51	SHCBP1	up	50.8168
ENSG00000174059	272.151	1.98461	0.129603	15.3129	6.26837e-53	1.81487e-51	CD34	up	50.7412
ENSG00000110104	1327.75	0.891909	0.0583744	15.2791	1.05369e-52	3.04476e-51	CCDC86	up	50.5164
ENSG00000104907	2504.21	0.670822	0.0439362	15.2681	1.2475e-52	3.59772e-51	TRMT1	up	50.444
ENSG00000167747	4550.59	0.649687	0.0426546	15.2313	2.19039e-52	6.26792e-51	C19orf48	up	50.2029
ENSG00000165689	3125.67	0.610589	0.0401478	15.2086	3.10331e-52	8.77802e-51	ENTR1	up	50.0566
ENSG00000133818	866.967	1.01801	0.0669864	15.1973	3.68333e-52	1.03987e-50	RRAS2	up	49.983
ENSG00000213699	1797.76	0.734506	0.0484466	15.1611	6.39434e-52	1.78811e-50	SLC35F6	up	49.7476
ENSG00000143333	1616.28	0.756551	0.0500165	15.126	1.091e-51	3.04508e-50	RGS16	up	49.5164
ENSG00000126822	1046.09	0.947097	0.0631514	14.9973	7.65238e-51	2.10398e-49	PLEKHG3	up	48.677
ENSG00000100036	667.702	1.21226	0.0809017	14.9843	9.29593e-51	2.54636e-49	SLC35E4	up	48.5941
ENSG00000214706	2166.35	0.837048	0.0559244	14.9675	1.19745e-50	3.274e-49	IFRD2	up	48.4849
ENSG00000188549	975.319	0.948493	0.0634519	14.9482	1.59987e-50	4.35004e-49	CCDC9B	up	48.3615
ENSG00000176014	2821.06	0.674363	0.0451912	14.9224	2.35495e-50	6.37957e-49	TUBB6	up	48.1952
ENSG00000123095	978.229	0.934272	0.0626161	14.9206	2.41984e-50	6.54333e-49	BHLHE41	up	48.1842
ENSG00000124225	839.823	1.10318	0.074025	14.9028	3.16266e-50	8.50514e-49	PMEPA1	up	48.0703
ENSG00000167767	118.116	4.02738	0.270652	14.8803	4.42757e-50	1.18851e-48	KRT80	up	47.925
ENSG00000261115	1180.62	0.894739	0.060145	14.8764	4.69267e-50	1.2551e-48	TMEM178B	up	47.9013
ENSG00000065328	1370.28	0.8082	0.0545026	14.8287	9.56253e-50	2.54374e-48	MCM10	up	47.5945
ENSG00000057657	181.016	2.44069	0.164785	14.8113	1.23774e-49	3.26893e-48	PRDM1	up	47.4856
ENSG00000141076	2171.81	0.65347	0.0441403	14.8044	1.37206e-49	3.61071e-48	UTP4	up	47.4424
ENSG00000165490	992.018	0.959995	0.0651368	14.7381	3.66822e-49	9.55097e-48	DDIAS	up	47.02
ENSG00000137962	431.42	1.39554	0.0951136	14.6723	9.6969e-49	2.49395e-47	ARHGAP29	up	46.6031
ENSG00000025770	3016.52	0.612174	0.0418179	14.639	1.58311e-48	4.06451e-47	NCAPH2	up	46.391
ENSG00000144040	1868.77	0.696951	0.0478022	14.5799	3.77133e-48	9.59897e-47	SFXN5	up	46.0178
ENSG00000116120	1725.61	0.751821	0.0516632	14.5523	5.64344e-48	1.43145e-46	FARSB	up	45.8442
ENSG00000148840	2008.08	0.693984	0.0477586	14.5311	7.69925e-48	1.94287e-46	PPRC1	up	45.7116
ENSG00000077044	1449.97	0.766913	0.0527883	14.5281	8.04305e-48	2.02616e-46	DGKD	up	45.6933
ENSG00000130635	112.295	4.07294	0.280389	14.526	8.28755e-48	2.08419e-46	COL5A1	up	45.6811
ENSG00000196428	979.919	0.930163	0.0640512	14.5222	8.76761e-48	2.19742e-46	TSC22D2	up	45.6581
ENSG00000105676	2480.4	0.66304	0.0457423	14.4951	1.30058e-47	3.2541e-46	ARMC6	up	45.4876
ENSG00000181104	2374	0.614988	0.0425606	14.4497	2.51696e-47	6.23403e-46	F2R	up	45.2052
ENSG00000160214	1944.09	0.729988	0.0505191	14.4497	2.51651e-47	6.23403e-46	RRP1	up	45.2052
ENSG00000142453	2629.77	0.606374	0.0419996	14.4376	3.00076e-47	7.41982e-46	CARM1	up	45.1296
ENSG00000187741	1363.37	0.800345	0.0556482	14.3822	6.69015e-47	1.63504e-45	FANCA	up	44.7865
ENSG00000055044	2348.38	0.621754	0.0432757	14.3673	8.30384e-47	2.02605e-45	NOP58	up	44.6933
ENSG00000131462	2240.2	0.681257	0.0475176	14.3369	1.28632e-46	3.11786e-45	TUBG1	up	44.5061
ENSG00000109805	1702.56	0.725373	0.0506049	14.334	1.34086e-46	3.2447e-45	NCAPG	up	44.4888
ENSG00000164818	2705.97	0.597321	0.0417176	14.3182	1.68414e-46	4.06872e-45	DNAAF5	up	44.3905
ENSG00000164134	2256.9	0.638156	0.0446036	14.3073	1.97092e-46	4.74598e-45	NAA15	up	44.3237
ENSG00000135318	1163.25	0.885411	0.0619876	14.2837	2.76599e-46	6.63883e-45	NT5E	up	44.1779
ENSG00000228300	2569.91	0.698983	0.0490139	14.2609	3.83406e-46	9.17249e-45	C19orf24	up	44.0375
ENSG00000157542	783.013	1.04029	0.0729933	14.2519	4.36277e-46	1.04036e-44	KCNJ6	up	43.9828
ENSG00000275832	2711.66	0.616842	0.0433577	14.2268	6.2445e-46	1.4795e-44	ARHGAP23	up	43.8299
ENSG00000104738	3946.54	0.594013	0.0418694	14.1873	1.09865e-45	2.58639e-44	MCM4	up	43.5873
ENSG00000148411	1890.03	0.662067	0.0468432	14.1337	2.3557e-45	5.50174e-44	NACC2	up	43.2595
ENSG00000168496	4141.89	0.650299	0.046019	14.1311	2.44386e-45	5.69859e-44	FEN1	up	43.2442
ENSG00000101773	1796.95	0.673375	0.0476772	14.1236	2.71613e-45	6.32348e-44	RBBP8	up	43.199
ENSG00000174136	677.146	1.17845	0.0837944	14.0636	6.35331e-45	1.46754e-43	RGMB	up	42.8334
ENSG00000049541	2701.05	0.5889	0.0422749	13.9303	4.1484e-44	9.43441e-43	RFC2	up	42.0253
ENSG00000073008	1528.52	0.752384	0.0541468	13.8953	6.76683e-44	1.52949e-42	PVR	up	41.8155
ENSG00000162975	2443	0.595527	0.0429014	13.8813	8.22385e-44	1.85597e-42	KCNF1	up	41.7314
ENSG00000037474	2197.48	0.6173	0.0445	13.8719	9.37347e-44	2.10574e-42	NSUN2	up	41.6766
ENSG00000107338	642.887	1.18918	0.0857436	13.8691	9.75481e-44	2.18808e-42	SHB	up	41.6599
ENSG00000185298	1953.14	0.670412	0.0485644	13.8046	2.39092e-43	5.29054e-42	CCDC137	up	41.2765
ENSG00000142634	2395.38	0.636862	0.0461455	13.8012	2.50778e-43	5.54081e-42	EFHD2	up	41.2564
ENSG00000111696	582.254	1.10158	0.0798336	13.7985	2.603e-43	5.74257e-42	NT5DC3	up	41.2409
ENSG00000072310	2690.63	0.709754	0.0514576	13.793	2.80963e-43	6.18917e-42	SREBF1	up	41.2084
ENSG00000121152	1814.86	0.684356	0.0498052	13.7406	5.79619e-43	1.273e-41	NCAPH	up	40.8952
ENSG00000164742	1634.25	0.779198	0.0567453	13.7315	6.57424e-43	1.44174e-41	ADCY1	up	40.8411
ENSG00000113645	633.083	1.13936	0.0836547	13.6198	3.05538e-42	6.62164e-41	WWC1	up	40.179
ENSG00000109861	1409.94	0.741777	0.0545251	13.6043	3.77554e-42	8.14642e-41	CTSC	up	40.089
ENSG00000116830	1674.4	0.726416	0.0534628	13.5873	4.76238e-42	1.02308e-40	TTF2	up	39.9901
ENSG00000156970	2010.01	0.677076	0.0499398	13.5579	7.1185e-42	1.51597e-40	BUB1B	up	39.8193
ENSG00000078269	1299.88	0.845078	0.0627431	13.4689	2.38495e-41	5.02099e-40	SYNJ2	up	39.2992
ENSG00000034152	1537.44	0.763431	0.0567454	13.4536	2.93182e-41	6.14598e-40	MAP2K3	up	39.2114
ENSG00000115902	1747.59	0.683178	0.0512382	13.3334	1.48037e-40	3.05548e-39	SLC1A4	up	38.5149
ENSG00000145685	720.433	0.953234	0.0716946	13.2958	2.44951e-40	5.02763e-39	LHFPL2	up	38.2986
ENSG00000106462	2642.16	0.601446	0.0452503	13.2915	2.59178e-40	5.31224e-39	EZH2	up	38.2747
ENSG00000124789	2313.45	0.624757	0.0470437	13.2804	3.00958e-40	6.14296e-39	NUP153	up	38.2116
ENSG00000139734	585.987	1.07709	0.0814555	13.2231	6.45459e-40	1.30841e-38	DIAPH3	up	37.8833
ENSG00000138092	1123.12	0.772873	0.0584835	13.2152	7.1651e-40	1.44845e-38	CENPO	up	37.8391
ENSG00000112139	749.244	0.969292	0.0735325	13.1818	1.11681e-39	2.24535e-38	MDGA1	up	37.6487
ENSG00000104899	1351.59	0.808604	0.0615931	13.1282	2.27114e-39	4.54753e-38	AMH	up	37.3422
ENSG00000134318	2380.79	0.608834	0.0465828	13.0699	4.89074e-39	9.73983e-38	ROCK2	up	37.0114
ENSG00000168924	2083.44	0.603548	0.0461844	13.0682	5.00296e-39	9.94988e-38	LETM1	up	37.0022
ENSG00000109881	2059.22	0.596589	0.0456602	13.0658	5.16124e-39	1.02508e-37	CCDC34	up	36.9892
ENSG00000182325	1906.66	0.635841	0.0487147	13.0523	6.16225e-39	1.22061e-37	FBXL6	up	36.9134
ENSG00000173540	1015.15	0.783881	0.0607101	12.9119	3.85827e-38	7.53104e-37	GMPPB	up	36.1231
ENSG00000120756	910.719	0.845237	0.0657684	12.8517	8.41167e-38	1.63539e-36	PLS1	up	35.7864
ENSG00000185838	870.912	0.901123	0.0701494	12.8458	9.08455e-38	1.75925e-36	GNB1L	up	35.7547
ENSG00000122861	296.58	1.45811	0.114016	12.7887	1.8964e-37	3.65323e-36	PLAU	up	35.4373
ENSG00000007968	973.045	0.811631	0.0635598	12.7696	2.42532e-37	4.65391e-36	E2F2	up	35.3322
ENSG00000167513	2009.89	0.654597	0.0513089	12.7579	2.81533e-37	5.38126e-36	CDT1	up	35.2691
ENSG00000161638	2029.8	0.619938	0.0486082	12.7538	2.96949e-37	5.6593e-36	ITGA5	up	35.2472
ENSG00000132182	3289.29	0.647904	0.0509244	12.7228	4.41481e-37	8.38415e-36	NUP210	up	35.0765
ENSG00000169641	1704.29	0.699789	0.0551786	12.6823	7.41697e-37	1.39954e-35	LUZP1	up	34.854
ENSG00000113569	1890.69	0.646186	0.0510613	12.6551	1.04856e-36	1.97099e-35	NUP155	up	34.7053
ENSG00000137807	1535.24	0.690762	0.0547608	12.6142	1.76428e-36	3.29116e-35	KIF23	up	34.4827
ENSG00000164251	244.915	1.56778	0.12453	12.5896	2.40841e-36	4.47576e-35	F2RL1	up	34.3491
ENSG00000101003	2102.43	0.604765	0.0480566	12.5844	2.57218e-36	4.76208e-35	GINS1	up	34.3222
ENSG00000083720	1768.23	0.611761	0.0487404	12.5514	3.90539e-36	7.20323e-35	OXCT1	up	34.1425
ENSG00000152518	2226.58	0.588688	0.0469277	12.5446	4.25658e-36	7.82159e-35	ZFP36L2	up	34.1067
ENSG00000197381	449.875	1.12911	0.0901813	12.5204	5.77351e-36	1.05564e-34	ADARB1	up	33.9765
ENSG00000235162	1235.18	0.727888	0.0582222	12.5019	7.28958e-36	1.32625e-34	C12orf75	up	33.8774
ENSG00000087253	813.353	0.874307	0.0700004	12.49	8.46108e-36	1.5375e-34	LPCAT2	up	33.8132
ENSG00000175792	2028.62	0.601969	0.0482162	12.4848	9.0385e-36	1.63838e-34	RUVBL1	up	33.7856
ENSG00000039560	513.527	1.10479	0.0885043	12.4829	9.25258e-36	1.67513e-34	RAI14	up	33.776
ENSG00000151718	1104.42	0.743671	0.0597212	12.4524	1.35735e-35	2.44239e-34	WWC2	up	33.6122
ENSG00000175920	108.792	2.7812	0.223386	12.4502	1.39522e-35	2.50747e-34	DOK7	up	33.6008
ENSG00000099250	88.2161	3.28334	0.266496	12.3204	7.03255e-35	1.24566e-33	NRP1	up	32.9046
ENSG00000139269	191.8	1.81967	0.148045	12.2913	1.00812e-34	1.77924e-33	INHBE	up	32.7498
ENSG00000183696	534.635	1.01812	0.0830632	12.2572	1.53802e-34	2.70476e-33	UPP1	up	32.5679
ENSG00000104825	1844.83	0.680294	0.0555031	12.2569	1.54323e-34	2.71067e-33	NFKBIB	up	32.5669
ENSG00000196754	193.583	1.76532	0.144688	12.2009	3.07559e-34	5.34493e-33	S100A2	up	32.2721
ENSG00000182752	419.19	1.29286	0.106033	12.193	3.38839e-34	5.88158e-33	PAPPA	up	32.2305
ENSG00000115504	2035.14	0.629504	0.0516718	12.1828	3.84092e-34	6.65925e-33	EHBP1	up	32.1766
ENSG00000119326	1440.14	0.660482	0.0542675	12.1709	4.44391e-34	7.69564e-33	CTNNAL1	up	32.1138
ENSG00000070601	311.125	1.48817	0.122635	12.1349	6.89664e-34	1.19151e-32	FRMPD1	up	31.9239
ENSG00000126749	1263.44	0.690444	0.0569481	12.1241	7.8725e-34	1.35376e-32	EMG1	up	31.8685
ENSG00000100311	472.992	1.07626	0.0891092	12.0779	1.38144e-33	2.35083e-32	PDGFB	up	31.6288
ENSG00000100065	209.115	1.73568	0.143715	12.0772	1.3935e-33	2.36863e-32	CARD10	up	31.6255
ENSG00000164171	1374.15	0.745123	0.061749	12.067	1.5787e-33	2.68034e-32	ITGA2	up	31.5718
ENSG00000161888	1370.36	0.653345	0.0543437	12.0225	2.70728e-33	4.55968e-32	SPC24	up	31.3411
ENSG00000100162	878.5	0.847596	0.0706415	11.9986	3.61534e-33	6.06134e-32	CENPM	up	31.2174
ENSG00000137825	638.281	0.929873	0.0775449	11.9914	3.94141e-33	6.60052e-32	ITPKA	up	31.1804
ENSG00000114767	1343.11	0.697468	0.0586102	11.9001	1.18183e-32	1.95035e-31	RRP9	up	30.7099
ENSG00000262655	215.579	1.58183	0.133941	11.8099	3.46936e-32	5.66201e-31	SPON1	up	30.247
ENSG00000145220	502.005	1.03329	0.087513	11.8072	3.58181e-32	5.83907e-31	LYAR	up	30.2337
ENSG00000105486	1593.06	0.65033	0.0550978	11.8032	3.75755e-32	6.11879e-31	LIG1	up	30.2133
ENSG00000179750	859.438	0.777607	0.0661047	11.7633	6.03504e-32	9.70944e-31	APOBEC3B	up	30.0128
ENSG00000171320	1151.84	0.745431	0.063471	11.7444	7.54193e-32	1.2081e-30	ESCO2	up	29.9179
ENSG00000138180	1171.82	0.737788	0.062883	11.7327	8.66519e-32	1.38352e-30	CEP55	up	29.859
ENSG00000101868	1109.4	0.742567	0.0633029	11.7304	8.90573e-32	1.42039e-30	POLA1	up	29.8476
ENSG00000186187	1402.28	0.672227	0.0573446	11.7226	9.76578e-32	1.55587e-30	ZNRF1	up	29.808
ENSG00000179958	1400.14	0.64519	0.055281	11.6711	1.7906e-31	2.83438e-30	DCTPP1	up	29.5475
ENSG00000165891	1658.81	0.661943	0.0567615	11.6618	1.99705e-31	3.1544e-30	E2F7	up	29.5011
ENSG00000169756	1014.9	0.761416	0.0656064	11.6058	3.8497e-31	6.00349e-30	LIMS1	up	29.2216
ENSG00000140416	1120.93	0.803414	0.0692256	11.6057	3.85417e-31	6.00411e-30	TPM1	up	29.2216
ENSG00000169689	1838.22	0.586063	0.0506107	11.5798	5.21513e-31	8.05612e-30	CENPX	up	29.0939
ENSG00000132603	804.299	0.782033	0.0677033	11.5509	7.30596e-31	1.12154e-29	NIP7	up	28.9502
ENSG00000154146	807.067	0.806484	0.0698255	11.55	7.38294e-31	1.13218e-29	NRGN	up	28.9461
ENSG00000106077	1003.67	0.723546	0.0626774	11.544	7.91884e-31	1.2131e-29	ABHD11	up	28.9161
ENSG00000174371	809.332	0.815727	0.070807	11.5204	1.04094e-30	1.58802e-29	EXO1	up	28.7991
ENSG00000189410	133.395	2.04797	0.178297	11.4863	1.54594e-30	2.34148e-29	SH2D5	up	28.6305
ENSG00000196715	1434.29	0.612499	0.0535248	11.4433	2.54102e-30	3.80172e-29	VKORC1L1	up	28.42
ENSG00000154839	729.688	0.832275	0.0728648	11.4222	3.23982e-30	4.81303e-29	SKA1	up	28.3176
ENSG00000141994	1829.62	0.588871	0.0517219	11.3853	4.94708e-30	7.31245e-29	DUS3L	up	28.1359
ENSG00000136114	457.571	1.08214	0.0950932	11.3798	5.27226e-30	7.7853e-29	THSD1	up	28.1087
ENSG00000137501	285.172	1.41905	0.12488	11.3633	6.36583e-30	9.34394e-29	SYTL2	up	28.0295
ENSG00000100522	1102.66	0.683782	0.0602279	11.3532	7.1461e-30	1.04684e-28	GNPNAT1	up	27.9801
ENSG00000064666	1135.65	0.67549	0.0597672	11.302	1.2823e-29	1.85997e-28	CNN2	up	27.7305
ENSG00000099139	577.516	0.906354	0.0803183	11.2845	1.56469e-29	2.26289e-28	PCSK5	up	27.6453
ENSG00000115107	1164.06	0.659251	0.0584893	11.2713	1.81837e-29	2.62204e-28	STEAP3	up	27.5814
ENSG00000119699	717.793	0.868795	0.0770802	11.2713	1.81813e-29	2.62204e-28	TGFB3	up	27.5814
ENSG00000147324	1515.63	0.596744	0.0529782	11.264	1.97688e-29	2.84782e-28	MFHAS1	up	27.5455
ENSG00000198522	888.13	0.740776	0.0657861	11.2604	2.05907e-29	2.96333e-28	GPN1	up	27.5282
ENSG00000116741	388.291	1.10428	0.0980899	11.2578	2.11992e-29	3.04496e-28	RGS2	up	27.5164
ENSG00000077514	1271.03	0.671955	0.0598461	11.228	2.96971e-29	4.23665e-28	POLD3	up	27.373
ENSG00000119912	1187.79	0.65636	0.0584986	11.2201	3.24909e-29	4.63073e-28	IDE	up	27.3344
ENSG00000164574	1558.33	0.679297	0.0610897	11.1197	1.00665e-28	1.41151e-27	GALNT10	up	26.8503
ENSG00000138190	683.486	0.820315	0.0739139	11.0983	1.27923e-28	1.78354e-27	EXOC6	up	26.7487
ENSG00000138135	328.084	1.24428	0.112297	11.0803	1.56426e-28	2.17271e-27	CH25H	up	26.663
ENSG00000162493	68.1835	3.63937	0.328893	11.0655	1.84403e-28	2.55168e-27	PDPN	up	26.5932
ENSG00000095752	99.374	2.54393	0.230001	11.0605	1.9495e-28	2.69511e-27	IL11	up	26.5694
ENSG00000145545	1291.34	0.61435	0.0555524	11.0589	1.98463e-28	2.7411e-27	SRD5A1	up	26.5621
ENSG00000185022	1474.8	0.58753	0.0531571	11.0527	2.12698e-28	2.924e-27	MAFF	up	26.534
ENSG00000162062	1003.5	0.727464	0.0662031	10.9884	4.34714e-28	5.88281e-27	TEDC2	up	26.2304
ENSG00000156504	1125.71	0.698198	0.0635452	10.9874	4.39316e-28	5.93964e-27	FAM122B	up	26.2262
ENSG00000091651	847.596	0.748225	0.0686655	10.8967	1.1957e-27	1.59466e-26	ORC6	up	25.7973
ENSG00000112029	952.98	0.710297	0.0651973	10.8946	1.22345e-27	1.62872e-26	FBXO5	up	25.7882
ENSG00000184207	2186.25	0.589606	0.0541286	10.8927	1.2491e-27	1.65987e-26	PGP	up	25.7799
ENSG00000188859	148.258	1.8476	0.169697	10.8876	1.32034e-27	1.74824e-26	FAM78B	up	25.7574
ENSG00000047648	1074.09	0.65426	0.0601474	10.8776	1.47354e-27	1.94409e-26	ARHGAP6	up	25.7113
ENSG00000160888	1530.26	0.622856	0.0575666	10.8198	2.77522e-27	3.63542e-26	IER2	up	25.4394
ENSG00000074582	859.04	0.721795	0.0668289	10.8006	3.41817e-27	4.46971e-26	BCS1L	up	25.3497
ENSG00000166803	1083.01	0.680501	0.0631354	10.7784	4.35242e-27	5.66121e-26	PCLAF	up	25.2471
ENSG00000146281	774.947	0.769035	0.0713521	10.778	4.37168e-27	5.68126e-26	PM20D2	up	25.2456
ENSG00000112576	904.023	0.72863	0.0676621	10.7687	4.83974e-27	6.26742e-26	CCND3	up	25.2029
ENSG00000284976	865.336	0.744977	0.0692307	10.7608	5.27123e-27	6.80825e-26	BX255925.3	up	25.167
ENSG00000091879	155.699	1.73691	0.161887	10.7292	7.42632e-27	9.56658e-26	ANGPT2	up	25.0192
ENSG00000134285	640.575	0.836649	0.0781998	10.6989	1.03031e-26	1.31689e-25	FKBP11	up	24.8805
ENSG00000166166	1743.2	0.5878	0.0549963	10.688	1.15854e-26	1.47438e-25	TRMT61A	up	24.8314
ENSG00000171476	248.816	1.3116	0.122724	10.6874	1.16621e-26	1.48286e-25	HOPX	up	24.8289
ENSG00000126453	1338.28	0.648155	0.0606572	10.6856	1.18935e-26	1.51099e-25	BCL2L12	up	24.8207
ENSG00000183856	1507.59	0.625852	0.0587271	10.6569	1.61826e-26	2.04882e-25	IQGAP3	up	24.6885
ENSG00000197299	809.792	0.806738	0.0757062	10.6562	1.63169e-26	2.06405e-25	BLM	up	24.6853
ENSG00000239672	1987.66	0.621451	0.0584435	10.6334	2.08464e-26	2.628e-25	NME1	up	24.5804
ENSG00000184992	1160.31	0.641065	0.0603488	10.6227	2.3379e-26	2.94476e-25	BRI3BP	up	24.531
ENSG00000135476	1527.53	0.586829	0.0553679	10.5987	3.02138e-26	3.79268e-25	ESPL1	up	24.4211
ENSG00000119969	1011.87	0.656462	0.0620658	10.5769	3.8143e-26	4.75964e-25	HELLS	up	24.3224
ENSG00000177192	851.071	0.819857	0.0775723	10.5689	4.15153e-26	5.1642e-25	PUS1	up	24.287
ENSG00000144655	1354.69	0.648925	0.0616637	10.5236	6.72392e-26	8.29209e-25	CSRNP1	up	24.0813
ENSG00000138035	1167.09	0.605576	0.0579527	10.4495	1.47312e-25	1.7912e-24	PNPT1	up	23.7469
ENSG00000128973	1159.73	0.642698	0.0618673	10.3883	2.80232e-25	3.37401e-24	CLN6	up	23.4719
ENSG00000135763	1190.5	0.615198	0.0593897	10.3587	3.82281e-25	4.5543e-24	URB2	up	23.3416
ENSG00000164362	484.538	0.932551	0.090053	10.3556	3.94783e-25	4.69566e-24	TERT	up	23.3283
ENSG00000090530	65.8941	3.17916	0.307006	10.3554	3.95578e-25	4.70131e-24	P3H2	up	23.3278
ENSG00000164951	511.967	0.899094	0.0868379	10.3537	4.02595e-25	4.78085e-24	PDP1	up	23.3205
ENSG00000178573	56.7697	4.37301	0.424158	10.3099	6.35954e-25	7.48567e-24	MAF	up	23.1258
ENSG00000198948	317.215	1.16899	0.113527	10.297	7.26658e-25	8.54649e-24	MFAP3L	up	23.0682
ENSG00000106078	1062.73	0.626942	0.0610849	10.2634	1.02963e-24	1.20618e-23	COBL	up	22.9186
ENSG00000188566	1234.68	0.655909	0.06392	10.2614	1.05164e-24	1.23001e-23	NDOR1	up	22.9101
ENSG00000132768	1324.57	0.596309	0.0581844	10.2486	1.20049e-24	1.40188e-23	DPH2	up	22.8533
ENSG00000164430	1047.97	0.642406	0.0628175	10.2265	1.50801e-24	1.7568e-23	CGAS	up	22.7553
ENSG00000132205	1139.43	0.648907	0.063625	10.1989	2.00445e-24	2.32278e-23	EMILIN2	up	22.634
ENSG00000111247	996.216	0.638004	0.0629081	10.1418	3.60255e-24	4.0902e-23	RAD51AP1	up	22.3883
ENSG00000155090	694.743	0.759332	0.0748765	10.1411	3.62871e-24	4.11673e-23	KLF10	up	22.3854
ENSG00000129173	337.24	1.04859	0.103471	10.1342	3.89683e-24	4.39721e-23	E2F8	up	22.3568
ENSG00000169188	1242.55	0.592889	0.0585175	10.1318	3.99125e-24	4.50031e-23	APEX2	up	22.3468
ENSG00000197956	203.79	3.48125	0.343802	10.1257	4.24777e-24	4.78223e-23	S100A6	up	22.3204
ENSG00000116750	1283.99	0.610749	0.0603513	10.1199	4.50876e-24	5.06831e-23	UCHL5	up	22.2951
ENSG00000189057	1044.51	0.625191	0.0618178	10.1135	4.81577e-24	5.40106e-23	FAM111B	up	22.2675
ENSG00000006062	446.357	0.96154	0.095688	10.0487	9.30874e-24	1.03223e-22	MAP3K14	up	21.9862
ENSG00000113273	551.355	0.830148	0.0828348	10.0217	1.22349e-23	1.34757e-22	ARSB	up	21.8704
ENSG00000259330	1309.45	0.593823	0.0593178	10.0109	1.36545e-23	1.49833e-22	INAFM2	up	21.8244
ENSG00000123094	509.212	0.865555	0.0869817	9.951	2.49652e-23	2.71923e-22	RASSF8	up	21.5656
ENSG00000132359	96.797	2.14691	0.215864	9.94565	2.63459e-23	2.8675e-22	RAP1GAP2	up	21.5425
ENSG00000163235	318.165	1.09686	0.111284	9.85644	6.42909e-23	6.90062e-22	TGFA	up	21.1611
ENSG00000179041	408.633	0.958636	0.0972751	9.85489	6.52863e-23	7.00236e-22	RRS1	up	21.1548
ENSG00000134690	1062.63	0.593547	0.060248	9.85172	6.73786e-23	7.21627e-22	CDCA8	up	21.1417
ENSG00000048162	639.647	0.750233	0.0762107	9.8442	7.26171e-23	7.74355e-22	NOP16	up	21.1111
ENSG00000163507	912.246	0.624132	0.0637223	9.79457	1.18808e-22	1.256e-21	CIP2A	up	20.901
ENSG00000145604	1018.28	0.615097	0.0628472	9.78719	1.27794e-22	1.3481e-21	SKP2	up	20.8703
ENSG00000131470	574.387	0.835286	0.0855044	9.76893	1.53054e-22	1.60652e-21	PSMC3IP	up	20.7941
ENSG00000164070	1118.84	0.585324	0.0601162	9.73655	2.10575e-22	2.20088e-21	HSPA4L	up	20.6574
ENSG00000176641	80.1784	2.26501	0.233713	9.69142	3.27933e-22	3.39856e-21	RNF152	up	20.4687
ENSG00000173846	1006.93	0.590479	0.0611755	9.6522	4.81117e-22	4.94437e-21	PLK3	up	20.3059
ENSG00000159147	922.831	0.634901	0.0660689	9.60969	7.27713e-22	7.4114e-21	DONSON	up	20.1301
ENSG00000046889	312.855	1.04953	0.109253	9.60638	7.51436e-22	7.64773e-21	PREX2	up	20.1165
ENSG00000169439	1031.62	0.613861	0.0639285	9.60231	7.81707e-22	7.95032e-21	SDC2	up	20.0996
ENSG00000023909	711.647	0.706073	0.0735904	9.59464	8.42102e-22	8.55276e-21	GCLM	up	20.0679
ENSG00000151725	1507.85	0.602546	0.0628569	9.58599	9.15744e-22	9.27514e-21	CENPU	up	20.0327
ENSG00000068438	1094.33	0.609933	0.0640796	9.51838	1.75904e-21	1.76346e-20	FTSJ1	up	19.7536
ENSG00000161980	615.731	0.727704	0.0767404	9.48267	2.47857e-21	2.47303e-20	POLR3K	up	19.6068
ENSG00000112578	945.418	0.639876	0.0675152	9.47751	2.60433e-21	2.59675e-20	BYSL	up	19.5856
ENSG00000134215	360.951	0.988491	0.104398	9.46851	2.83857e-21	2.81318e-20	VAV3	up	19.5508
ENSG00000188486	8354.95	0.717369	0.0761348	9.42235	4.41093e-21	4.33359e-20	H2AFX	up	19.3632
ENSG00000065060	1053.26	0.60277	0.0641818	9.39159	5.90988e-21	5.78697e-20	UHRF1BP1	up	19.2375
ENSG00000070950	784.803	0.695359	0.0743578	9.35153	8.63886e-21	8.37572e-20	RAD18	up	19.077
ENSG00000116455	795.297	0.676173	0.0727218	9.29807	1.43015e-20	1.37125e-19	WDR77	up	18.8629
ENSG00000149328	543.374	0.7989	0.0859506	9.29487	1.47389e-20	1.41135e-19	GLB1L2	up	18.8504
ENSG00000159259	924.88	0.67712	0.0730152	9.27369	1.79811e-20	1.71291e-19	CHAF1B	up	18.7663
ENSG00000033050	1040.73	0.60467	0.0652055	9.2733	1.80473e-20	1.717e-19	ABCF2	up	18.7652
ENSG00000146555	46.3643	4.17236	0.450491	9.2618	2.01009e-20	1.90499e-19	SDK1	up	18.7201
ENSG00000179331	645.922	0.745201	0.0806755	9.23701	2.53477e-20	2.39455e-19	RAB39A	up	18.6208
ENSG00000165244	733.106	0.708503	0.076793	9.22613	2.80577e-20	2.64209e-19	ZNF367	up	18.5781
ENSG00000178773	525.113	0.809999	0.0882062	9.18302	4.19175e-20	3.91717e-19	CPNE7	up	18.407
ENSG00000096060	790.335	0.638855	0.0699321	9.13537	6.51857e-20	6.02661e-19	FKBP5	up	18.2199
ENSG00000117600	106.917	1.76894	0.193665	9.13404	6.59883e-20	6.09699e-19	PLPPR4	up	18.2149
ENSG00000092470	994.465	0.60525	0.0664431	9.1093	8.29162e-20	7.62281e-19	WDR76	up	18.1179
ENSG00000138829	169.203	10.7684	1.18394	9.09542	9.4221e-20	8.64592e-19	FBN2	up	18.0632
ENSG00000165071	400.369	0.870858	0.0957694	9.09328	9.60952e-20	8.81241e-19	TMEM71	up	18.0549
ENSG00000197905	811.183	0.609766	0.067128	9.08363	1.05015e-19	9.60651e-19	TEAD4	up	18.0174
ENSG00000080839	700.213	0.652892	0.071954	9.07374	1.14997e-19	1.04871e-18	RBL1	up	17.9793
ENSG00000128422	63.7444	6.16085	0.679334	9.06895	1.20173e-19	1.09456e-18	KRT17	up	17.9608
ENSG00000175175	861.357	0.607672	0.0670134	9.06792	1.21312e-19	1.10425e-18	PPM1E	up	17.9569
ENSG00000108854	821.47	0.641086	0.0711455	9.01091	2.04348e-19	1.83963e-18	SMURF2	up	17.7353
ENSG00000144959	367.597	0.896793	0.0996304	9.0012	2.23269e-19	2.00385e-18	NCEH1	up	17.6981
ENSG00000158859	82.9535	2.05875	0.228728	9.00087	2.23932e-19	2.00858e-18	ADAMTS4	up	17.6971
ENSG00000115946	772.784	0.612852	0.0686447	8.92788	4.34239e-19	3.85505e-18	PNO1	up	17.414
ENSG00000072786	1000.61	0.618176	0.0692861	8.92207	4.57651e-19	4.06045e-18	STK10	up	17.3914
ENSG00000124145	736.407	0.652928	0.0733921	8.89643	5.76699e-19	5.09216e-18	SDC4	up	17.2931
ENSG00000164338	495.698	0.768116	0.0866812	8.8614	7.90156e-19	6.9354e-18	UTP15	up	17.1589
ENSG00000123685	702.463	0.672248	0.0761866	8.82371	1.10733e-18	9.69049e-18	BATF3	up	17.0137
ENSG00000110328	615.717	0.716162	0.0817275	8.7628	1.90466e-18	1.64917e-17	GALNT18	up	16.7827
ENSG00000180287	87.6789	1.91243	0.218328	8.75945	1.96198e-18	1.69781e-17	PLD5	up	16.7701
ENSG00000125845	243.147	1.09855	0.125797	8.73273	2.48605e-18	2.14001e-17	BMP2	up	16.6696
ENSG00000051341	559.373	0.741844	0.0850424	8.72322	2.704e-18	2.32084e-17	POLQ	up	16.6344
ENSG00000165480	642.451	0.724157	0.0833774	8.68529	3.77761e-18	3.21982e-17	SKA3	up	16.4922
ENSG00000014138	503.372	0.772179	0.0890706	8.66929	4.34833e-18	3.68707e-17	POLA2	up	16.4333
ENSG00000154639	888.484	0.590287	0.0681022	8.66766	4.41074e-18	3.73784e-17	CXADR	up	16.4274
ENSG00000104064	639.946	0.669845	0.0775385	8.63887	5.67717e-18	4.77537e-17	GABPB1	up	16.321
ENSG00000102034	630.763	0.64564	0.0751837	8.5875	8.88853e-18	7.42575e-17	ELF4	up	16.1293
ENSG00000164236	473.516	0.762835	0.088871	8.58362	9.19302e-18	7.66709e-17	ANKRD33B	up	16.1154
ENSG00000277161	582.727	0.67498	0.0788287	8.56262	1.1033e-17	9.15505e-17	PIGW	up	16.0383
ENSG00000109586	761.511	0.615912	0.0721292	8.53902	1.35368e-17	1.11885e-16	GALNT7	up	15.9512
ENSG00000102359	503.195	0.754806	0.0884656	8.5322	1.43594e-17	1.18552e-16	SRPX2	up	15.9261
ENSG00000166452	928.021	0.591658	0.0700723	8.44354	3.07864e-17	2.49148e-16	AKIP1	up	15.6035
ENSG00000163171	723.383	0.62275	0.0749447	8.30946	9.61351e-17	7.63743e-16	CDC42EP3	up	15.1171
ENSG00000083857	9849.52	0.618941	0.0745451	8.30291	1.01593e-16	8.0493e-16	FAT1	up	15.0942
ENSG00000186832	90.7505	9.86631	1.18914	8.297	1.06769e-16	8.45038e-16	KRT16	up	15.0731
ENSG00000196935	270.29	0.95513	0.115567	8.26472	1.40021e-16	1.10347e-15	SRGAP1	up	14.9572
ENSG00000107815	599.039	0.656314	0.0794413	8.26162	1.43708e-16	1.13132e-15	TWNK	up	14.9464
ENSG00000183527	663.132	0.625919	0.0759268	8.24372	1.66937e-16	1.31068e-15	PSMG1	up	14.8825
ENSG00000262814	916.974	0.643594	0.0783984	8.20928	2.22528e-16	1.73696e-15	MRPL12	up	14.7602
ENSG00000136982	635.019	0.633984	0.077461	8.18456	2.73304e-16	2.12543e-15	DSCC1	up	14.6726
ENSG00000138435	344.141	0.832979	0.101801	8.18245	2.78136e-16	2.16186e-15	CHRNA1	up	14.6652
ENSG00000175602	7318.8	0.67692	0.0831258	8.14333	3.84567e-16	2.96565e-15	CCDC85B	up	14.5279
ENSG00000136159	484.275	0.724487	0.0895452	8.09075	5.93006e-16	4.51868e-15	NUDT15	up	14.345
ENSG00000111845	594.368	0.631422	0.0781875	8.07573	6.7072e-16	5.0947e-15	PAK1IP1	up	14.2929
ENSG00000177943	305.312	0.888359	0.11012	8.06718	7.19412e-16	5.4425e-15	MAMDC4	up	14.2642
ENSG00000103995	552.839	0.669674	0.0833393	8.03551	9.319e-16	6.9997e-15	CEP152	up	14.1549
ENSG00000188643	586.84	0.662786	0.0831397	7.97197	1.56169e-15	1.15885e-14	S100A16	up	13.936
ENSG00000118655	526.843	0.676843	0.0854685	7.91921	2.39026e-15	1.74989e-14	DCLRE1B	up	13.757
ENSG00000074590	463.623	0.710248	0.0898894	7.90135	2.75895e-15	2.0138e-14	NUAK1	up	13.696
ENSG00000174669	509.894	0.698262	0.0885287	7.8874	3.08536e-15	2.24538e-14	SLC29A2	up	13.6487
ENSG00000170017	330.121	0.811125	0.103329	7.84996	4.1618e-15	3.00502e-14	ALCAM	up	13.5222
ENSG00000162545	89.5672	1.78581	0.229328	7.78712	6.85516e-15	4.88513e-14	CAMK2N1	up	13.3111
ENSG00000164403	425.168	0.733827	0.0943792	7.77531	7.5265e-15	5.35061e-14	SHROOM1	up	13.2716
ENSG00000123219	484.235	0.672861	0.0866072	7.76911	7.90411e-15	5.61093e-14	CENPK	up	13.251
ENSG00000184162	610.183	0.633603	0.0816013	7.76463	8.18868e-15	5.80734e-14	NR2C2AP	up	13.236
ENSG00000170209	324.534	0.819868	0.105626	7.76197	8.36221e-15	5.92755e-14	ANKK1	up	13.2271
ENSG00000174099	507.274	0.647776	0.0835659	7.75169	9.06811e-15	6.41251e-14	MSRB3	up	13.193
ENSG00000023572	643.42	0.602673	0.0778276	7.74369	9.65719e-15	6.816e-14	GLRX2	up	13.1665
ENSG00000143369	216.874	0.985382	0.127769	7.71219	1.23678e-14	8.6875e-14	ECM1	up	13.0611
ENSG00000163347	42.453	2.77616	0.36061	7.69851	1.37657e-14	9.6236e-14	CLDN1	up	13.0167
ENSG00000174177	618.63	0.587563	0.076407	7.6899	1.47247e-14	1.026e-13	CTU2	up	12.9889
ENSG00000239264	453.53	0.691029	0.0900641	7.67264	1.68497e-14	1.17019e-13	TXNDC5	up	12.9317
ENSG00000170049	542.225	0.644288	0.0842652	7.64596	2.074e-14	1.43159e-13	KCNAB3	up	12.8442
ENSG00000165501	497.568	0.665684	0.0872155	7.63263	2.30007e-14	1.58245e-13	LRR1	up	12.8007
ENSG00000187164	43.2877	2.61254	0.347234	7.52385	5.31862e-14	3.59874e-13	SHTN1	up	12.4438
ENSG00000170689	255.577	0.989206	0.131838	7.50317	6.22938e-14	4.19956e-13	HOXB9	up	12.3768
ENSG00000253626	312.057	0.830247	0.110977	7.48126	7.3615e-14	4.92896e-13	EIF5AL1	up	12.3072
ENSG00000186871	428.835	0.686916	0.091971	7.46883	8.09099e-14	5.40022e-13	ERCC6L	up	12.2676
ENSG00000146263	696.602	0.608423	0.0814823	7.46694	8.20831e-14	5.47605e-13	MMS22L	up	12.2615
ENSG00000139618	626.945	0.595836	0.0800167	7.44639	9.59294e-14	6.35376e-13	BRCA2	up	12.197
ENSG00000109686	95.1536	1.5055	0.202781	7.42426	1.13416e-13	7.49177e-13	SH3D19	up	12.1254
ENSG00000166592	53.0325	2.09224	0.282464	7.40711	1.29083e-13	8.50378e-13	RRAD	up	12.0704
ENSG00000118894	464.736	0.663282	0.0897794	7.3879	1.49162e-13	9.76542e-13	EEF2KMT	up	12.0103
ENSG00000196517	474.38	0.632461	0.0857696	7.37396	1.65636e-13	1.08152e-12	SLC6A9	up	11.966
ENSG00000196872	379.347	0.770034	0.105034	7.33129	2.27949e-13	1.47208e-12	KIAA1211L	up	11.8321
ENSG00000125454	278.08	0.852761	0.116702	7.30718	2.72814e-13	1.7526e-12	SLC25A19	up	11.7563
ENSG00000127423	249.662	0.889199	0.121756	7.30313	2.81158e-13	1.80306e-12	AUNIP	up	11.744
ENSG00000129824	41.7323	8.7446	1.20187	7.27582	3.4431e-13	2.19848e-12	RPS4Y1	up	11.6579
ENSG00000142279	438.176	0.714553	0.0983533	7.26517	3.72581e-13	2.37181e-12	WTIP	up	11.6249
ENSG00000117877	208.302	0.953731	0.131604	7.247	4.26118e-13	2.7056e-12	CD3EAP	up	11.5677
ENSG00000118785	394.357	0.715259	0.0995574	7.18438	6.7511e-13	4.23186e-12	SPP1	up	11.3735
ENSG00000183763	508.703	0.666399	0.0929482	7.16958	7.52273e-13	4.69956e-12	TRAIP	up	11.3279
ENSG00000165449	331.903	0.776226	0.108904	7.12764	1.02105e-12	6.31177e-12	SLC16A9	up	11.1998
ENSG00000075131	518.034	0.589043	0.0830901	7.08921	1.34881e-12	8.25477e-12	TIPIN	up	11.0833
ENSG00000148459	239.024	0.847839	0.119977	7.0667	1.58664e-12	9.65413e-12	PDSS1	up	11.0153
ENSG00000067048	34.962	8.48797	1.20695	7.03259	2.02729e-12	1.22695e-11	DDX3Y	up	10.9112
ENSG00000164023	114.964	1.27578	0.181435	7.0316	2.0418e-12	1.23522e-11	SGMS2	up	10.9083
ENSG00000143153	229.581	0.903709	0.128792	7.0168	2.27012e-12	1.37054e-11	ATP1B1	up	10.8631
ENSG00000146410	183.408	1.07345	0.153742	6.98217	2.90658e-12	1.7462e-11	MTFR2	up	10.7579
ENSG00000110446	46.201	2.16718	0.310967	6.96917	3.18815e-12	1.91068e-11	SLC15A3	up	10.7188
ENSG00000028137	341.42	0.729276	0.10527	6.92769	4.27758e-12	2.53269e-11	TNFRSF1B	up	10.5964
ENSG00000137331	54.736	2.07159	0.299382	6.91956	4.5306e-12	2.68018e-11	IER3	up	10.5718
ENSG00000121440	186.26	0.928261	0.13741	6.75539	1.42448e-11	8.14298e-11	PDZRN3	up	10.0892
ENSG00000152056	243.459	0.865695	0.12823	6.75112	1.46705e-11	8.38306e-11	AP1S3	up	10.0766
ENSG00000023445	516.503	0.607289	0.0899629	6.75044	1.47394e-11	8.41914e-11	BIRC3	up	10.0747
ENSG00000120158	421.36	0.63032	0.0935717	6.73623	1.6255e-11	9.26691e-11	RCL1	up	10.0331
ENSG00000150347	323.62	0.736453	0.109353	6.73466	1.64316e-11	9.35674e-11	ARID5B	up	10.0289
ENSG00000152253	443.732	0.595202	0.0886471	6.71428	1.88993e-11	1.0704e-10	SPC25	up	9.97045
ENSG00000177602	375.644	0.733821	0.109596	6.69566	2.14701e-11	1.20996e-10	HASPIN	up	9.91723
ENSG00000143507	353.117	0.689798	0.103213	6.68328	2.33658e-11	1.31278e-10	DUSP10	up	9.88181
ENSG00000131459	137.553	1.07415	0.160802	6.67994	2.39043e-11	1.34099e-10	GFPT2	up	9.87257
ENSG00000162645	24.8897	4.76376	0.713233	6.67911	2.40392e-11	1.34753e-10	GBP2	up	9.87046
ENSG00000133302	276.725	0.763399	0.114935	6.64199	3.09476e-11	1.72364e-10	SLF1	up	9.76355
ENSG00000120526	415.696	0.636605	0.0960134	6.63037	3.3484e-11	1.86209e-10	NUDCD1	up	9.73
ENSG00000146678	156.045	1.12213	0.169544	6.61856	3.62717e-11	2.01105e-10	IGFBP1	up	9.69658
ENSG00000166979	320.783	0.713418	0.108417	6.58033	4.69405e-11	2.58217e-10	EVA1C	up	9.58802
ENSG00000112182	188.188	0.931394	0.141674	6.57418	4.89204e-11	2.68707e-10	BACH2	up	9.57072
ENSG00000052850	44.3256	2.00491	0.306854	6.53375	6.41425e-11	3.48422e-10	ALX4	up	9.45789
ENSG00000135521	356.623	0.653009	0.100207	6.51657	7.19338e-11	3.88738e-10	LTV1	up	9.41034
ENSG00000283154	196.497	0.893897	0.137675	6.4928	8.42557e-11	4.53001e-10	IQCJ-SCHIP1	up	9.3439
ENSG00000182010	358.121	0.647427	0.0998205	6.48592	8.8193e-11	4.7279e-10	RTKN2	up	9.32533
ENSG00000120075	115.632	1.20383	0.187118	6.43355	1.24658e-10	6.60348e-10	HOXB5	up	9.18023
ENSG00000125347	428.484	0.608627	0.094872	6.41524	1.40601e-10	7.40808e-10	IRF1	up	9.13029
ENSG00000049130	93.3153	1.30634	0.206087	6.33881	2.31549e-10	1.20026e-09	KITLG	up	8.92072
ENSG00000146376	218.565	0.887361	0.140246	6.32716	2.49714e-10	1.28898e-09	ARHGAP18	up	8.88975
ENSG00000166106	155.853	0.99858	0.158826	6.28727	3.23088e-10	1.65497e-09	ADAMTS15	up	8.78121
ENSG00000128510	21.2333	3.65586	0.584928	6.25011	4.1016e-10	2.0872e-09	CPA4	up	8.68044
ENSG00000102384	406.935	0.596319	0.09549	6.24483	4.24254e-10	2.15594e-09	CENPI	up	8.66636
ENSG00000175505	151.792	0.966479	0.154946	6.23754	4.44519e-10	2.25504e-09	CLCF1	up	8.64685
ENSG00000103064	322.504	0.66336	0.106696	6.21732	5.05721e-10	2.55058e-09	SLC7A6	up	8.59336
ENSG00000165246	19.2775	7.63324	1.22879	6.21201	5.2312e-10	2.63383e-09	NLGN4Y	up	8.57941
ENSG00000145990	164.129	0.908194	0.14638	6.20437	5.4917e-10	2.76027e-09	GFOD1	up	8.55905
ENSG00000187801	310.657	0.690135	0.111335	6.19873	5.69211e-10	2.8571e-09	ZFP69B	up	8.54407
ENSG00000137673	27.3724	2.78338	0.449446	6.19291	5.90646e-10	2.95865e-09	MMP7	up	8.52891
ENSG00000278619	307.249	0.669711	0.108184	6.19049	5.99765e-10	3.00229e-09	MRM1	up	8.52255
ENSG00000118515	308.21	0.699853	0.113329	6.17541	6.59938e-10	3.29567e-09	SGK1	up	8.48206
ENSG00000120129	400.447	0.62742	0.101894	6.15757	7.38676e-10	3.67394e-09	DUSP1	up	8.43487
ENSG00000268089	32.4518	7.42	1.20878	6.1384	8.33568e-10	4.13334e-09	GABRQ	up	8.3837
ENSG00000165617	252.443	0.751211	0.122474	6.13363	8.58953e-10	4.25349e-09	DACT1	up	8.37125
ENSG00000186767	356.683	0.605917	0.0988969	6.12675	8.96899e-10	4.43693e-09	SPIN4	up	8.35292
ENSG00000144218	206.153	0.814578	0.133777	6.08905	1.1358e-09	5.58686e-09	AFF3	up	8.25283
ENSG00000196878	417.013	0.598549	0.0983494	6.08595	1.15803e-09	5.69242e-09	LAMB3	up	8.2447
ENSG00000089041	190.346	0.832833	0.137705	6.04797	1.46684e-09	7.17452e-09	P2RX7	up	8.14421
ENSG00000156398	342.724	0.62663	0.103638	6.04631	1.48198e-09	7.24615e-09	SFXN2	up	8.13989
ENSG00000142149	40.3539	1.97806	0.328131	6.02825	1.65748e-09	8.06679e-09	HUNK	up	8.0933
ENSG00000128805	159.26	0.923177	0.155233	5.94704	2.7303e-09	1.29837e-08	ARHGAP22	up	7.8866
ENSG00000152402	171.204	0.940354	0.158399	5.93663	2.90946e-09	1.38045e-08	GUCY1A2	up	7.85998
ENSG00000243678	197.703	0.796235	0.134252	5.9309	3.0127e-09	1.42714e-08	NME2	up	7.84553
ENSG00000130513	401.414	0.632729	0.107391	5.89185	3.81905e-09	1.78955e-08	GDF15	up	7.74726
ENSG00000197261	181.715	0.842989	0.143617	5.86971	4.36552e-09	2.03333e-08	C6orf141	up	7.69179
ENSG00000105357	26.0396	6.1917	1.06144	5.83329	5.4344e-09	2.5145e-08	MYH14	up	7.59955
ENSG00000198796	18.9999	3.47354	0.59563	5.8317	5.4864e-09	2.53617e-08	ALPK2	up	7.59582
ENSG00000151376	212.721	0.742709	0.128501	5.77978	7.48001e-09	3.41596e-08	ME3	up	7.46649
ENSG00000122877	208.774	0.800088	0.138713	5.76794	8.02452e-09	3.65443e-08	EGR2	up	7.43718
ENSG00000100626	207.861	0.768336	0.133211	5.76783	8.0301e-09	3.65584e-08	GALNT16	up	7.43701
ENSG00000027001	339.872	0.592264	0.102944	5.75327	8.75312e-09	3.97151e-08	MIPEP	up	7.40104
ENSG00000165194	18.4132	4.03251	0.701341	5.7497	8.93995e-09	4.05254e-08	PCDH19	up	7.39227
ENSG00000108932	71.2887	1.28706	0.224218	5.74024	9.45417e-09	4.27643e-08	SLC16A6	up	7.36892
ENSG00000213853	18.9685	5.13227	0.901548	5.69273	1.25026e-08	5.59523e-08	EMP2	up	7.25218
ENSG00000152229	159.601	0.847883	0.149402	5.67516	1.38561e-08	6.17285e-08	PSTPIP2	up	7.20951
ENSG00000172318	170.02	0.831657	0.146724	5.66817	1.44333e-08	6.42414e-08	B3GALT1	up	7.19219
ENSG00000111186	138.927	0.921215	0.16257	5.66658	1.45678e-08	6.47423e-08	WNT5B	up	7.18881
ENSG00000146674	23.5945	6.05813	1.06974	5.66319	1.48584e-08	6.59742e-08	IGFBP3	up	7.18063
ENSG00000108846	46.0212	1.6317	0.291405	5.59942	2.15074e-08	9.37181e-08	ABCC3	up	7.02818
ENSG00000087494	103.999	1.11841	0.200152	5.58781	2.29951e-08	9.99346e-08	PTHLH	up	7.00028
ENSG00000214595	271.58	0.659169	0.118799	5.5486	2.87974e-08	1.2409e-07	EML6	up	6.90626
ENSG00000166401	215.29	0.716761	0.130773	5.48093	4.23089e-08	1.79426e-07	SERPINB8	up	6.74611
ENSG00000163191	17.3643	4.97314	0.908856	5.47187	4.45302e-08	1.88575e-07	S100A11	up	6.72452
ENSG00000221866	260.161	0.639439	0.117048	5.46304	4.68042e-08	1.97524e-07	PLXNA4	up	6.70438
ENSG00000143942	245.517	0.657236	0.120558	5.45163	4.99103e-08	2.09971e-07	CHAC2	up	6.67784
ENSG00000154642	11.5824	6.90547	1.26891	5.44205	5.26709e-08	2.21143e-07	C21orf91	up	6.65533
ENSG00000137841	59.0875	1.39004	0.256246	5.42462	5.80772e-08	2.4308e-07	PLCB2	up	6.61425
ENSG00000169436	20.2007	5.8109	1.07265	5.41734	6.04934e-08	2.52618e-07	COL22A1	up	6.59753
ENSG00000117245	119.051	0.920657	0.172164	5.34757	8.91432e-08	3.65527e-07	KIF17	up	6.43708
ENSG00000213949	138.506	0.843332	0.157992	5.3378	9.40805e-08	3.84808e-07	ITGA1	up	6.41476
ENSG00000188517	184.253	0.718782	0.134918	5.32754	9.95536e-08	4.06292e-07	COL25A1	up	6.39116
ENSG00000011422	143.639	0.819852	0.153975	5.32458	1.01186e-07	4.12497e-07	PLAUR	up	6.38458
ENSG00000140044	308.966	0.613562	0.115341	5.31957	1.04012e-07	4.23667e-07	JDP2	up	6.37298
ENSG00000121904	16.2966	3.40115	0.639823	5.31577	1.06206e-07	4.31409e-07	CSMD2	up	6.36511
ENSG00000114374	10.4152	6.7493	1.27752	5.28311	1.27008e-07	5.10423e-07	USP9Y	up	6.29207
ENSG00000183684	4562.97	0.627362	0.11905	5.26974	1.36619e-07	5.47555e-07	ALYREF	up	6.26157
ENSG00000118985	138.029	0.861256	0.163799	5.258	1.45629e-07	5.81609e-07	ELL2	up	6.23537
ENSG00000184349	233.346	0.635075	0.121895	5.21002	1.88824e-07	7.45232e-07	EFNA5	up	6.12771
ENSG00000146267	253.677	0.614837	0.118533	5.18708	2.1362e-07	8.39498e-07	FAXC	up	6.07598
ENSG00000189292	25.3861	2.14965	0.414637	5.18441	2.16698e-07	8.51139e-07	ALKAL2	up	6.07
ENSG00000181649	15.4539	3.52646	0.68129	5.17615	2.26517e-07	8.88285e-07	PHLDA2	up	6.05145
ENSG00000114805	324.855	0.651971	0.125975	5.17539	2.27441e-07	8.91672e-07	PLCH1	up	6.04979
ENSG00000104450	236.604	0.638353	0.123356	5.17488	2.28061e-07	8.93867e-07	SPAG1	up	6.04873
ENSG00000127920	17.114	3.10231	0.600978	5.16209	2.44203e-07	9.5409e-07	GNG11	up	6.02041
ENSG00000175305	177.44	0.765105	0.148836	5.1406	2.73866e-07	1.06462e-06	CCNE2	up	5.97281
ENSG00000012817	9.57029	6.61464	1.29001	5.12758	2.93484e-07	1.13907e-06	KDM5D	up	5.94345
ENSG00000182132	116.156	0.892633	0.174406	5.11814	3.08568e-07	1.19573e-06	KCNIP1	up	5.92237
ENSG00000120549	248.184	0.600999	0.11834	5.07859	3.8024e-07	1.45662e-06	KIAA1217	up	5.83665
ENSG00000165124	84.4362	1.03954	0.20801	4.99756	5.80607e-07	2.18834e-06	SVEP1	up	5.65989
ENSG00000163453	302.254	0.622864	0.125186	4.97549	6.50814e-07	2.43737e-06	IGFBP7	up	5.61308
ENSG00000177054	8.23986	6.41396	1.29526	4.95187	7.35045e-07	2.74029e-06	ZDHHC13	up	5.5622
ENSG00000171608	234.721	0.616024	0.124407	4.95168	7.35769e-07	2.7422e-06	PIK3CD	up	5.5619
ENSG00000197442	151.025	0.740497	0.151479	4.88844	1.01637e-06	3.74269e-06	MAP3K5	up	5.42682
ENSG00000102554	149.266	0.747394	0.153122	4.88103	1.05531e-06	3.88027e-06	KLF5	up	5.41114
ENSG00000156675	12.7281	4.10096	0.848832	4.83129	1.35649e-06	4.93961e-06	RAB11FIP1	up	5.30631
ENSG00000157168	12.69	4.51955	0.936052	4.82831	1.37696e-06	5.01044e-06	NRG1	up	5.30012
ENSG00000100490	82.8728	1.00891	0.210306	4.79733	1.60793e-06	5.81782e-06	CDKL1	up	5.23524
ENSG00000275464	982.499	0.959607	0.201283	4.76744	1.86581e-06	6.71136e-06	FP565260.1	up	5.17319
ENSG00000233608	7.10145	6.19552	1.30979	4.73015	2.24357e-06	8.0057e-06	TWIST2	up	5.0966
ENSG00000198692	7.06286	6.18164	1.30961	4.72022	2.35594e-06	8.39242e-06	EIF1AY	up	5.07611
ENSG00000163874	166.611	0.687002	0.146001	4.70545	2.53312e-06	8.99533e-06	ZC3H12A	up	5.04598
ENSG00000133135	6.91613	6.15852	1.31251	4.69217	2.70318e-06	9.57385e-06	RNF128	up	5.01891
ENSG00000126249	168.925	0.667727	0.142387	4.68952	2.7385e-06	9.68728e-06	PDCD2L	up	5.0138
ENSG00000180611	147.548	0.712375	0.151986	4.68711	2.77085e-06	9.79702e-06	MB21D2	up	5.00891
ENSG00000115112	62.8646	1.10631	0.237366	4.66076	3.15044e-06	1.10543e-05	TFCP2L1	up	4.95647
ENSG00000011677	11.2673	5.87312	1.26117	4.65687	3.21061e-06	1.126e-05	GABRA3	up	4.94846
ENSG00000182240	11.9777	3.66993	0.788248	4.65581	3.22704e-06	1.1315e-05	BACE2	up	4.94635
ENSG00000147869	32.286	1.74869	0.378075	4.62526	3.74131e-06	1.30406e-05	CER1	up	4.8847
ENSG00000165061	187.145	0.626745	0.135636	4.62078	3.82296e-06	1.33001e-05	ZMAT4	up	4.87615
ENSG00000155629	105.919	0.838209	0.182352	4.59666	4.29319e-06	1.48101e-05	PIK3AP1	up	4.82944
ENSG00000164879	84.5219	1.0249	0.224162	4.57211	4.8283e-06	1.65707e-05	CA3	up	4.78066
ENSG00000131398	11.0232	5.85138	1.28007	4.57114	4.85085e-06	1.66442e-05	KCNC3	up	4.77874
ENSG00000213793	185.646	0.625884	0.137295	4.55867	5.14788e-06	1.76101e-05	ZNF888	up	4.75424
ENSG00000140905	193.192	0.604884	0.133007	4.54777	5.42179e-06	1.8487e-05	GCSH	up	4.73313
ENSG00000133424	117.403	0.773153	0.170843	4.5255	6.02517e-06	2.04639e-05	LARGE1	up	4.68901
ENSG00000141965	203.792	0.60412	0.135312	4.46464	8.02041e-06	2.68507e-05	FEM1A	up	4.57104
ENSG00000089472	6.00254	5.94594	1.33991	4.43756	9.09831e-06	3.02941e-05	HEPH	up	4.51864
ENSG00000177374	175.525	0.619127	0.140162	4.41721	9.99812e-06	3.31106e-05	HIC1	up	4.48003
ENSG00000165757	9.5088	5.63183	1.27721	4.40946	1.03628e-05	3.4249e-05	JCAD	up	4.46535
ENSG00000183878	5.77907	5.90301	1.33916	4.408	1.04332e-05	3.44739e-05	UTY	up	4.46251
ENSG00000118513	119.585	0.824221	0.187428	4.39754	1.09483e-05	3.60548e-05	MYB	up	4.44304
ENSG00000118523	10.6137	4.23635	0.967468	4.3788	1.19332e-05	3.91061e-05	CTGF	up	4.40776
ENSG00000170500	58.6153	1.09803	0.251351	4.36853	1.25088e-05	4.09285e-05	LONRF2	up	4.38797
ENSG00000165478	11.0921	3.53497	0.810002	4.36415	1.27618e-05	4.17286e-05	HEPACAM	up	4.37957
ENSG00000181544	168.452	0.634307	0.146061	4.34277	1.407e-05	4.57623e-05	FANCB	up	4.33949
ENSG00000156804	163.193	0.640407	0.148738	4.30562	1.66522e-05	5.36048e-05	FBXO32	up	4.2708
ENSG00000253304	115.787	0.738174	0.172171	4.28744	1.80743e-05	5.79003e-05	TMEM200B	up	4.23732
ENSG00000110786	5.31958	5.78343	1.35291	4.2748	1.91305e-05	6.11421e-05	PTPN5	up	4.21366
ENSG00000176842	163.93	0.627663	0.147198	4.26406	2.00747e-05	6.39656e-05	IRX5	up	4.19405
ENSG00000185697	173.921	0.60383	0.141703	4.26124	2.03295e-05	6.47216e-05	MYBL1	up	4.18895
ENSG00000182195	5.28233	5.77537	1.35707	4.25577	2.0833e-05	6.62529e-05	LDOC1	up	4.1788
ENSG00000184226	153.085	0.644455	0.152049	4.23846	2.25055e-05	7.1249e-05	PCDH9	up	4.14722
ENSG00000139117	8.34969	5.42613	1.28876	4.21034	2.54991e-05	8.0192e-05	CPNE8	up	4.09587
ENSG00000234602	71.2842	1.04775	0.24897	4.20835	2.57241e-05	8.08134e-05	MCIDAS	up	4.09252
ENSG00000148677	5.10241	5.71833	1.36142	4.20026	2.66606e-05	8.35666e-05	ANKRD1	up	4.07797
ENSG00000156049	16.6924	2.11241	0.504221	4.18946	2.79617e-05	8.74515e-05	GNA14	up	4.05823
ENSG00000153406	44.6918	1.21141	0.289275	4.18774	2.81745e-05	8.80796e-05	NMRAL1	up	4.05512
ENSG00000107105	9.48269	4.71311	1.13526	4.15158	3.30189e-05	0.000102248	ELAVL2	up	3.99034
ENSG00000165474	120.048	0.701101	0.168972	4.14921	3.33632e-05	0.000103271	GJB2	up	3.98602
ENSG00000138061	73.5644	0.924932	0.223481	4.13875	3.49205e-05	0.000107684	CYP1B1	up	3.96785
ENSG00000254087	146.951	0.628215	0.152134	4.12934	3.63803e-05	0.000111858	LYN	up	3.95133
ENSG00000187720	174.493	0.601566	0.146468	4.10714	4.00589e-05	0.000122606	THSD4	up	3.91149
ENSG00000104327	37.3165	1.28164	0.312197	4.10523	4.03919e-05	0.000123599	CALB1	up	3.90798
ENSG00000132199	173.127	0.596552	0.146366	4.07576	4.58637e-05	0.00013936	ENOSF1	up	3.85586
ENSG00000171004	34.5756	1.3559	0.332791	4.07433	4.61465e-05	0.000140132	HS6ST2	up	3.85346
ENSG00000171860	27.8405	1.62733	0.40093	4.05889	4.93062e-05	0.000149051	C3AR1	up	3.82666
ENSG00000130940	149.257	0.636857	0.157634	4.0401	5.34288e-05	0.000160755	CASZ1	up	3.79383
ENSG00000126010	70.9201	0.911707	0.226055	4.03312	5.50402e-05	0.000165469	GRPR	up	3.78128
ENSG00000124813	50.8569	1.07946	0.268091	4.02645	5.6625e-05	0.00017006	RUNX2	up	3.7694
ENSG00000168918	11.9045	2.69677	0.670775	4.02038	5.81038e-05	0.000174217	INPP5D	up	3.75891
ENSG00000105974	49.1778	1.11326	0.277755	4.00806	6.12191e-05	0.00018326	CAV1	up	3.73693
ENSG00000099958	146.22	0.626386	0.156379	4.00557	6.18694e-05	0.000185056	DERL3	up	3.7327
ENSG00000134595	8.49091	3.91916	0.980162	3.99849	6.3749e-05	0.000190407	SOX3	up	3.72032
ENSG00000117228	8.98855	3.55133	0.890646	3.98737	6.68105e-05	0.000199067	GBP1	up	3.701
ENSG00000104369	13.0311	2.51641	0.633983	3.9692	7.2114e-05	0.000213918	JPH1	up	3.66975
ENSG00000162614	65.8133	0.947771	0.239432	3.95842	7.5448e-05	0.000223086	NEXN	up	3.65153
ENSG00000275895	229.845	2.05601	0.522025	3.93852	8.19858e-05	0.000241452	U2AF1L5	up	3.61717
ENSG00000183426	157.321	0.599872	0.152372	3.93689	8.25454e-05	0.000243051	NPIPA1	up	3.6143
ENSG00000071205	108.822	0.734811	0.18666	3.93663	8.26322e-05	0.000243258	ARHGAP10	up	3.61393
ENSG00000198538	9.03464	3.20535	0.817202	3.92235	8.7689e-05	0.000257271	ZNF28	up	3.58961
ENSG00000171488	11.805	2.54036	0.659874	3.84977	0.00011823	0.00034097	LRRC8C	up	3.46728
ENSG00000108511	163.497	0.586344	0.152667	3.84067	0.0001227	0.000352827	HOXB6	up	3.45244
ENSG00000132334	59.3552	0.912983	0.240318	3.79906	0.000145248	0.000413867	PTPRE	up	3.38314
ENSG00000174343	25.8694	1.58718	0.418257	3.79475	0.000147793	0.00042063	CHRNA9	up	3.3761
ENSG00000106714	7.88474	3.81086	1.00823	3.77976	0.00015698	0.000445574	CNTNAP3	up	3.35108
ENSG00000197417	102.49	0.681475	0.180651	3.77233	0.000161728	0.000458344	SHPK	up	3.33881
ENSG00000197565	160.243	0.591325	0.157523	3.75389	0.000174109	0.000490812	COL4A6	up	3.30908
ENSG00000157557	119.645	0.640832	0.172294	3.71942	0.000199681	0.000558705	ETS2	up	3.25282
ENSG00000188613	115.098	0.651462	0.175316	3.71594	0.00020245	0.000565592	NANOS1	up	3.2475
ENSG00000258986	5.97508	4.95759	1.34148	3.69562	0.000219353	0.00061004	TMEM179	up	3.21464
ENSG00000173376	8.67693	3.12991	0.852144	3.67298	0.000239737	0.0006636	NDNF	up	3.17809
ENSG00000197321	80.5182	0.782773	0.213301	3.66981	0.000242734	0.000671518	SVIL	up	3.17294
ENSG00000128617	133.255	0.60738	0.165658	3.66648	0.000245916	0.000680025	OPN1SW	up	3.16747
ENSG00000139329	21.2579	1.6002	0.439405	3.64174	0.000270802	0.000742477	LUM	up	3.12932
ENSG00000111981	131.429	0.588484	0.162848	3.61371	0.000301844	0.000821625	ULBP1	up	3.08533
ENSG00000172399	5.61699	4.83101	1.34164	3.60083	0.000317208	0.00086106	MYOZ2	up	3.06497
ENSG00000083454	149.39	0.611741	0.17012	3.59595	0.000323212	0.000875745	P2RX5	up	3.05762
ENSG00000049323	51.9128	0.934514	0.260785	3.58347	0.000339059	0.000915277	LTBP1	up	3.03845
ENSG00000175874	31.9073	1.20772	0.338097	3.5721	0.000354136	0.00095305	CREG2	up	3.02088
ENSG00000145087	13.5668	1.96048	0.54918	3.56983	0.000357212	0.000960276	STXBP5L	up	3.0176
ENSG00000244274	67.4057	0.811552	0.22799	3.5596	0.000371418	0.000994656	DBNDD2	up	3.00233
ENSG00000124802	125.375	0.595583	0.167728	3.55089	0.000383933	0.00102612	EEF1E1	up	2.9888
ENSG00000178163	3.37752	5.1256	1.44915	3.53696	0.00040476	0.00107791	ZNF518B	up	2.96742
ENSG00000224420	65.7923	0.865167	0.244941	3.53214	0.00041221	0.00109672	ADM5	up	2.9599
ENSG00000137877	91.5785	0.694301	0.199124	3.48678	0.000488875	0.00128837	SPTBN5	up	2.88996
ENSG00000184110	483.026	0.714699	0.205629	3.47567	0.00050957	0.00133931	EIF3C	up	2.87312
ENSG00000115009	6.56191	3.51391	1.02196	3.4384	0.000585157	0.0015252	CCL20	up	2.81667
ENSG00000185187	6.43712	3.48969	1.01975	3.42212	0.000621359	0.0016147	SIGIRR	up	2.79191
ENSG00000117013	103.835	0.622111	0.182026	3.41771	0.000631507	0.00163905	KCNQ4	up	2.78541
ENSG00000132185	37.9985	1.05317	0.309257	3.40548	0.000660468	0.0017094	FCRLA	up	2.76716
ENSG00000154556	24.5874	1.34235	0.394344	3.40401	0.000664052	0.00171747	SORBS2	up	2.76511
ENSG00000212123	58.8721	0.881045	0.259603	3.39382	0.000689257	0.00177767	PRR22	up	2.75015
ENSG00000134668	61.1664	0.822469	0.243786	3.37373	0.000741567	0.00190259	SPOCD1	up	2.72065
ENSG00000183837	3.02752	4.95483	1.47205	3.36593	0.000762857	0.00195144	PNMA3	up	2.70965
ENSG00000215784	100.165	0.646175	0.192144	3.36298	0.000771055	0.00197138	FAM72D	up	2.70523
ENSG00000125637	29.6932	1.21306	0.360867	3.36151	0.000775176	0.00198054	PSD4	up	2.70322
ENSG00000131080	3.06161	4.98296	1.48301	3.36003	0.000779343	0.00199084	EDA2R	up	2.70096
ENSG00000164690	13.2941	1.95053	0.582084	3.35094	0.000805382	0.00205238	SHH	up	2.68774
ENSG00000146242	3.02527	4.95313	1.48009	3.3465	0.000818399	0.00208303	TPBG	up	2.6813
ENSG00000241945	41.7323	0.967743	0.289321	3.34488	0.000823183	0.0020934	PWP2	up	2.67915
ENSG00000142698	2.95438	4.94454	1.48984	3.31885	0.000903898	0.00228212	C1orf94	up	2.64166
ENSG00000182667	93.6778	0.625551	0.189379	3.30318	0.000955957	0.00240861	NTM	up	2.61823
ENSG00000109854	4.56251	4.55079	1.38099	3.2953	0.000983155	0.00246785	HTATIP2	up	2.60768
ENSG00000121101	24.9511	1.26202	0.383473	3.29102	0.000998242	0.00250146	TEX14	up	2.60181
ENSG00000158445	18.3601	1.48974	0.452948	3.28899	0.00100546	0.00251869	KCNB1	up	2.59883
ENSG00000273079	5.83811	3.92375	1.19493	3.28365	0.00102471	0.00256385	GRIN2B	up	2.59111
ENSG00000041353	16.7768	1.57608	0.481514	3.27318	0.00106346	0.00265316	RAB27B	up	2.57624
ENSG00000153404	42.1226	0.954991	0.292488	3.26506	0.0010944	0.00272297	PLEKHG4B	up	2.56496
ENSG00000104332	10.0896	2.3382	0.716532	3.26321	0.00110158	0.00273945	SFRP1	up	2.56234
ENSG00000105825	3.09841	4.9677	1.52501	3.25748	0.00112407	0.00279068	TFPI2	up	2.55429
ENSG00000078081	4.37004	4.47322	1.381	3.23912	0.00119899	0.0029617	LAMP3	up	2.52846
ENSG00000185483	47.0822	0.876373	0.271155	3.232	0.00122929	0.0030335	ROR1	up	2.51806
ENSG00000145423	4.95736	4.64043	1.43837	3.22616	0.00125461	0.0030908	SFRP2	up	2.50993
ENSG00000183454	2.84669	4.87017	1.51229	3.22039	0.00128015	0.00314845	GRIN2A	up	2.5019
ENSG00000113430	2.73495	4.82451	1.50639	3.20269	0.00136148	0.00333625	IRX4	up	2.47674
ENSG00000154493	15.871	1.54406	0.484302	3.18821	0.00143157	0.00349694	C10orf90	up	2.45631
ENSG00000147202	5.54419	3.84038	1.20514	3.18668	0.00143918	0.00351495	DIAPH2	up	2.45408
ENSG00000125430	9.85359	2.19573	0.689769	3.18328	0.00145618	0.00355235	HS3ST3B1	up	2.44948
ENSG00000214866	2.84084	4.84846	1.52787	3.17334	0.00150695	0.00366649	DCDC2C	up	2.43575
ENSG00000104267	14.7546	1.61813	0.511253	3.16504	0.00155063	0.00376034	CA2	up	2.42477
ENSG00000197140	50.1488	0.828384	0.262853	3.15151	0.0016243	0.00392157	ADAM32	up	2.40654
ENSG00000186297	2.69411	4.78721	1.53343	3.12189	0.00179691	0.00430798	GABRA5	up	2.36573
ENSG00000184507	2.51238	4.70969	1.5387	3.06084	0.0022072	0.00521775	NUTM1	up	2.28252
ENSG00000072201	45.1088	0.851915	0.278895	3.05461	0.00225351	0.00531093	LNX1	up	2.27483
ENSG00000114279	10.3627	2.01832	0.662207	3.04788	0.00230465	0.0054229	FGF12	up	2.26577
ENSG00000173068	5.41365	3.23629	1.06279	3.04508	0.00232618	0.00547182	BNC2	up	2.26187
ENSG00000230778	7.48994	2.38664	0.789532	3.02286	0.00250401	0.00584627	ANKRD63	up	2.23312
ENSG00000020633	23.3598	1.22517	0.406939	3.0107	0.00260643	0.00606385	RUNX3	up	2.21725
ENSG00000204396	37.9289	0.935017	0.310888	3.00756	0.0026335	0.00612143	VWA7	up	2.21315
ENSG00000177076	60.0791	0.716841	0.238765	3.00228	0.00267962	0.00622178	ACER2	up	2.20609
ENSG00000168685	4.82047	3.7114	1.23796	2.998	0.00271759	0.00630199	IL7R	up	2.20052
ENSG00000134508	78.0563	0.645942	0.216878	2.97837	0.00289787	0.00668638	CABLES1	up	2.17481
ENSG00000124615	5.46114	3.22987	1.08698	2.97141	0.00296433	0.00683224	MOCS1	up	2.16544
ENSG00000196159	9.45824	1.95809	0.659983	2.96688	0.00300837	0.00692532	FAT4	up	2.15956
ENSG00000170290	8.94997	2.02852	0.685633	2.95861	0.0030903	0.00709814	SLN	up	2.14886
ENSG00000115297	7.86821	2.20897	0.747033	2.95699	0.0031066	0.00713004	TLX2	up	2.14691
ENSG00000111799	5.70334	2.85369	0.968418	2.94676	0.00321126	0.00735193	COL12A1	up	2.1336
ENSG00000165152	6.24178	2.60375	0.883624	2.94668	0.00321208	0.00735265	TMEM246	up	2.13356
ENSG00000174607	89.3147	0.586241	0.199085	2.94468	0.0032329	0.00739572	UGT8	up	2.13102
ENSG00000007908	5.97758	2.86027	0.971509	2.94415	0.00323843	0.00740721	SELE	up	2.13035
ENSG00000069020	17.201	1.33008	0.453597	2.9323	0.0033646	0.00767318	MAST4	up	2.11502
ENSG00000254585	28.796	1.05495	0.361684	2.91678	0.00353664	0.00803196	MAGEL2	up	2.09518
ENSG00000107295	9.67719	2.08026	0.714971	2.90958	0.00361919	0.00820555	SH3GL2	up	2.08589
ENSG00000135437	49.6809	0.777558	0.267513	2.90662	0.00365354	0.00827322	RDH5	up	2.08233
ENSG00000133019	6.47102	2.59404	0.895015	2.89832	0.00375167	0.00847073	CHRM3	up	2.07208
ENSG00000061455	93.4132	0.635373	0.21929	2.89741	0.00376263	0.00849157	PRDM6	up	2.07101
ENSG00000154451	3.52555	4.13961	1.42964	2.89557	0.00378476	0.00853497	GBP5	up	2.0688
ENSG00000171403	2.34635	4.57131	1.58137	2.89072	0.00384357	0.00865169	KRT9	up	2.0629
ENSG00000019582	3.4591	4.1218	1.43045	2.88147	0.00395826	0.00888949	CD74	up	2.05112
ENSG00000136244	3.53044	4.1605	1.44414	2.88096	0.00396464	0.00889976	IL6	up	2.05062
ENSG00000169851	4.64631	3.56743	1.23943	2.87829	0.00399834	0.00896995	PCDH7	up	2.04721
ENSG00000137571	3.4416	4.11643	1.43054	2.87752	0.00400811	0.00899048	SLCO5A1	up	2.04622
ENSG00000118939	22.7167	1.12265	0.390324	2.8762	0.00402494	0.00902549	UCHL3	up	2.04453
ENSG00000230797	23.9768	1.08181	0.377787	2.86356	0.00418913	0.00937115	YY2	up	2.02821
ENSG00000104889	54.6843	0.749749	0.26344	2.846	0.0044272	0.00985404	RNASEH2A	up	2.00639
ENSG00000153531	53.8393	0.709528	0.249787	2.84053	0.00450383	0.0100095	ADPRHL1	up	1.99959
ENSG00000086717	3.34962	4.08558	1.43864	2.83988	0.00451306	0.010027	PPEF1	up	1.99883
ENSG00000060140	2.12738	4.4609	1.58329	2.81748	0.0048402	0.0106734	STYK1	up	1.9717
ENSG00000143603	11.9661	1.64195	0.585119	2.80618	0.00501327	0.0110204	KCNN3	up	1.9578
ENSG00000077238	2.16373	4.50116	1.60438	2.80554	0.00502325	0.011039	IL4R	up	1.95707
ENSG00000157315	15.1843	1.43871	0.51282	2.80548	0.0050241	0.0110392	TMED6	up	1.95706
ENSG00000148357	19.8275	1.2074	0.43038	2.80542	0.00502507	0.0110397	HMCN2	up	1.95704
ENSG00000146094	49.0773	0.749233	0.2681	2.79461	0.00519631	0.0113871	DOK3	up	1.94359
ENSG00000179869	9.52813	1.78944	0.641383	2.78997	0.00527132	0.0115377	ABCA13	up	1.93788
ENSG00000111057	2.11078	4.42917	1.59544	2.77615	0.00550066	0.0119987	KRT18	up	1.92087
ENSG00000198108	79.1994	0.59888	0.21685	2.76172	0.00574974	0.0124829	CHSY3	up	1.90368
ENSG00000142675	69.7566	0.708175	0.257083	2.75466	0.00587528	0.0127255	CNKSR1	up	1.89533
ENSG00000144366	5.17256	2.73772	0.996042	2.7486	0.00598501	0.0129498	GULP1	up	1.88774
ENSG00000154133	5.40585	2.68397	0.976851	2.74757	0.00600383	0.0129886	ROBO4	up	1.88644
ENSG00000261884	35.9667	0.856014	0.312481	2.73941	0.00615497	0.0132805	AC040162.1	up	1.87679
ENSG00000185760	29.1951	0.939768	0.345693	2.71851	0.00655774	0.0140631	KCNQ5	up	1.85192
ENSG00000189337	47.2456	0.746335	0.275173	2.71224	0.00668306	0.0143089	KAZN	up	1.84439
ENSG00000015592	24.391	1.10643	0.407952	2.71215	0.00668485	0.0143107	STMN4	up	1.84434
ENSG00000283378	3.13915	3.97609	1.46833	2.7079	0.00677096	0.014474	CNTNAP3C	up	1.83941
ENSG00000263513	54.8849	0.67061	0.248358	2.70017	0.00693035	0.0147847	FAM72C	up	1.83019
ENSG00000133687	12.2079	1.51806	0.564134	2.69095	0.00712486	0.0151536	TMTC1	up	1.81948
ENSG00000173918	44.0271	0.744579	0.277058	2.68744	0.00720015	0.0152995	C1QTNF1	up	1.81532
ENSG00000155465	34.005	0.912915	0.3397	2.68742	0.00720072	0.0152995	SLC7A7	up	1.81532
ENSG00000188015	52.1021	0.702149	0.264414	2.6555	0.00791919	0.0166841	S100A3	up	1.7777
ENSG00000173218	2.05829	4.4032	1.65975	2.65294	0.00797952	0.0168016	VANGL1	up	1.77465
ENSG00000175279	62.573	0.628164	0.237677	2.64293	0.00821916	0.0172618	CENPS	up	1.76292
ENSG00000278637	11.8651	1.50155	0.568382	2.6418	0.0082466	0.0173145	HIST1H4A	up	1.76159
ENSG00000172548	11.4231	1.56246	0.593095	2.63442	0.00842821	0.0176756	NIPAL4	up	1.75263
ENSG00000163810	4.89839	2.64675	1.00784	2.62616	0.00863537	0.0180818	TGM4	up	1.74276
ENSG00000162733	51.0941	0.68159	0.259619	2.62535	0.0086561	0.01812	DDR2	up	1.74184
ENSG00000162654	1.87071	4.26692	1.62745	2.62185	0.00874538	0.0182887	GBP4	up	1.73782
ENSG00000136167	56.154	0.674652	0.260089	2.59392	0.00948872	0.019709	LCP1	up	1.70534
ENSG00000168298	31.8147	0.966466	0.372834	2.59222	0.00953597	0.0197932	HIST1H1E	up	1.70348
ENSG00000116774	14.3307	1.46713	0.567459	2.58544	0.00972541	0.0201431	OLFML3	up	1.69587
ENSG00000188064	9.91087	1.60556	0.623239	2.57616	0.00999044	0.0206435	WNT7B	up	1.68522
ENSG00000172955	8.47956	1.76571	0.692173	2.55096	0.0107427	0.0220711	ADH6	up	1.65618
ENSG00000124102	52.624	0.649112	0.254471	2.55083	0.0107466	0.0220758	PI3	up	1.65608
ENSG00000100985	4.20924	2.87165	1.1279	2.54601	0.0108961	0.0223519	MMP9	up	1.65069
ENSG00000254656	2.77575	3.79092	1.49255	2.53988	0.0110889	0.0226843	RTL1	up	1.64428
ENSG00000141682	17.4637	1.18094	0.466237	2.53292	0.0113116	0.0230916	PMAIP1	up	1.63655
ENSG00000221947	2.97087	3.85525	1.53092	2.51826	0.0117936	0.0239992	XKR9	up	1.6198
ENSG00000133985	57.0193	0.657266	0.261823	2.51035	0.0120613	0.0245	TTC9	up	1.61083
ENSG00000170421	5.37754	2.34108	0.934506	2.50515	0.01224	0.0248219	KRT8	up	1.60516
ENSG00000198846	2.82999	3.81739	1.52417	2.50456	0.0122602	0.0248595	TOX	up	1.60451
ENSG00000089558	32.6639	0.81638	0.32628	2.50208	0.0123466	0.0250175	KCNH4	up	1.60176
ENSG00000169271	3.03462	3.8875	1.55855	2.49431	0.0126202	0.0254912	HSPB3	up	1.59361
ENSG00000108018	3.69326	3.29308	1.32433	2.48659	0.0128972	0.0259902	SORCS1	up	1.58519
ENSG00000162105	5.18461	2.31647	0.93189	2.48578	0.0129267	0.026039	SHANK2	up	1.58438
ENSG00000131095	27.8346	0.944162	0.380235	2.4831	0.0130244	0.0262137	GFAP	up	1.58147
ENSG00000125384	8.48081	1.72773	0.697706	2.47631	0.013275	0.0266749	PTGER2	up	1.5739
ENSG00000080709	1.68764	4.124	1.66784	2.47265	0.0134114	0.0269123	KCNN2	up	1.57005
ENSG00000125538	3.67583	3.23863	1.32738	2.43988	0.0146922	0.0292673	IL1B	up	1.53362
ENSG00000186446	3.44515	3.17351	1.30321	2.43515	0.0148856	0.0296084	ZNF501	up	1.52858
ENSG00000149090	17.2061	1.10524	0.455719	2.42526	0.0152975	0.0303418	PAMR1	up	1.51796
ENSG00000157551	10.8171	1.41492	0.584005	2.42278	0.0154021	0.0305169	KCNJ15	up	1.51546
ENSG00000196155	4.46716	2.43456	1.00944	2.4118	0.0158739	0.0313375	PLEKHG4	up	1.50394
ENSG00000221994	27.6094	0.863484	0.358638	2.40767	0.0160545	0.0316516	ZNF630	up	1.4996
ENSG00000119737	41.486	0.688544	0.286449	2.40372	0.016229	0.0319571	GPR75	up	1.49543
ENSG00000278318	2.50512	3.63132	1.51485	2.39714	0.0165235	0.0324892	ZNF229	up	1.48826
ENSG00000101638	45.2521	0.669241	0.280022	2.38996	0.0168503	0.0330657	ST8SIA5	up	1.48062
ENSG00000100078	41.3664	0.681525	0.285503	2.3871	0.0169819	0.0332972	PLA2G3	up	1.47759
ENSG00000082126	9.61136	1.62914	0.682589	2.38671	0.0169998	0.0333278	MPP4	up	1.47719
ENSG00000153233	6.06254	1.97654	0.828249	2.38641	0.0170137	0.0333508	PTPRR	up	1.47689
ENSG00000058085	43.5968	0.668655	0.280629	2.3827	0.0171861	0.0336573	LAMC2	up	1.47292
ENSG00000183889	50.7166	0.712211	0.299379	2.37896	0.0173615	0.0339695	PKD1P1	up	1.46891
ENSG00000169246	55.7029	0.606423	0.255311	2.37523	0.0175381	0.0342738	NPIPB3	up	1.46504
ENSG00000097096	44.9908	0.670617	0.284145	2.36012	0.0182691	0.0355422	SYDE2	up	1.44926
ENSG00000104783	23.3521	0.916414	0.389349	2.35371	0.0185872	0.0361275	KCNN4	up	1.44216
ENSG00000019102	33.4567	0.748026	0.321145	2.32925	0.0198459	0.0383516	VSIG2	up	1.41622
ENSG00000188501	49.0765	0.677262	0.29122	2.3256	0.0200399	0.0386706	LCTL	up	1.41262
ENSG00000175868	29.5745	0.848998	0.366006	2.31963	0.0203608	0.0392437	CALCB	up	1.40623
ENSG00000153162	2.56077	3.63794	1.56925	2.31828	0.0204344	0.03937	BMP6	up	1.40483
ENSG00000009950	30.1499	0.785252	0.340622	2.30534	0.0211473	0.0406321	MLXIPL	up	1.39113
ENSG00000276345	58.0314	0.652136	0.283036	2.30408	0.0212182	0.0407577	AC004556.1	up	1.38979
ENSG00000162817	4.27644	2.32324	1.01778	2.28266	0.0224506	0.0428513	C1orf115	up	1.36804
ENSG00000171587	10.9619	1.35283	0.593828	2.27815	0.0227178	0.0432924	DSCAM	up	1.36359
ENSG00000119900	19.4566	1.01997	0.449361	2.26982	0.0232185	0.0441454	OGFRL1	up	1.35511
ENSG00000271698	14.6693	1.14873	0.507266	2.26456	0.02354	0.0446932	AC233992.2	up	1.34976
ENSG00000163814	10.3962	1.50321	0.66458	2.26189	0.023704	0.0449699	CDCP1	up	1.34708
ENSG00000125730	13.1867	1.1795	0.524715	2.24789	0.0245835	0.0463818	C3	up	1.33365
ENSG00000180914	47.5228	0.60693	0.270284	2.24553	0.0247342	0.0466361	OXTR	up	1.33128
ENSG00000138172	39.432	0.655211	0.292729	2.23829	0.0252022	0.0474276	CALHM2	up	1.32397
ENSG00000153933	14.6307	1.09673	0.49236	2.22749	0.0259148	0.0486444	DGKE	up	1.31297
ENSG00000132688	47566	0.577608	0.0225151	25.6542	3.79452e-145	6.5788e-143	NES	stable	142.182
ENSG00000116133	19267.1	0.574945	0.0247322	23.2468	1.53216e-119	1.76402e-117	DHCR24	stable	116.753
ENSG00000156508	198208	-0.504251	0.022637	-22.2755	6.38901e-110	6.03557e-108	EEF1A1	stable	107.219
ENSG00000162512	15440.8	-0.556581	0.0254917	-21.8338	1.10828e-105	9.49574e-104	SDC3	stable	103.022
ENSG00000170558	15525.4	0.551153	0.0263078	20.9502	1.86817e-97	1.39752e-95	CDH2	stable	94.8546
ENSG00000142534	22372.2	-0.554719	0.027415	-20.2342	4.89818e-91	3.23697e-89	RPS11	stable	88.4899
ENSG00000100316	31786.7	-0.482325	0.0238409	-20.231	5.21867e-91	3.43337e-89	RPL3	stable	88.4643
ENSG00000172893	18859.2	0.52172	0.0261664	19.9386	1.88415e-88	1.16179e-86	DHCR7	stable	85.9349
ENSG00000011304	16635.7	0.551703	0.0278362	19.8196	2.01536e-87	1.20733e-85	PTBP1	stable	84.9182
ENSG00000044574	27918.2	0.484393	0.0252024	19.2201	2.51149e-82	1.40196e-80	HSPA5	stable	79.8533
ENSG00000106263	17503.4	0.551987	0.0290948	18.972	2.90476e-80	1.57381e-78	EIF3B	stable	77.803
ENSG00000100201	12954.8	-0.532134	0.0283103	-18.7965	8.06987e-79	4.23223e-77	DDX17	stable	76.3734
ENSG00000105894	27606.3	-0.555411	0.0298011	-18.6373	1.6025e-77	8.2e-76	PTN	stable	75.0862
ENSG00000142541	47002.2	-0.539396	0.0289685	-18.62	2.2101e-77	1.12311e-75	RPL13A	stable	74.9496
ENSG00000234745	9724.62	-0.543846	0.0293775	-18.5124	1.64152e-76	8.17265e-75	HLA-B	stable	74.0876
ENSG00000149428	12351.2	0.50429	0.0273361	18.4477	5.43707e-76	2.662e-74	HYOU1	stable	73.5748
ENSG00000155660	14613.2	0.492385	0.0267377	18.4154	9.88273e-76	4.82257e-74	PDIA4	stable	73.3167
ENSG00000177606	18836.2	0.578472	0.0314167	18.4129	1.03513e-75	5.03455e-74	JUN	stable	73.298
ENSG00000135862	25781.2	0.485666	0.0264233	18.3802	1.89134e-75	9.16864e-74	LAMC1	stable	73.0377
ENSG00000063046	8462.46	-0.535408	0.0293818	-18.2225	3.42431e-74	1.62787e-72	EIF4B	stable	71.7884
ENSG00000092201	10040.5	0.506887	0.0280306	18.0833	4.31101e-73	2.00414e-71	SUPT16H	stable	70.6981
ENSG00000135506	69126.3	-0.426741	0.0238509	-17.892	1.36052e-71	6.15031e-70	OS9	stable	69.2111
ENSG00000074410	27909.6	-0.447915	0.0250681	-17.8679	2.09563e-71	9.41564e-70	CA12	stable	69.0262
ENSG00000110321	26634	0.450767	0.0252574	17.8469	3.05519e-71	1.36438e-69	EIF4G2	stable	68.8651
ENSG00000105220	17022.1	-0.456329	0.0255988	-17.8262	4.42704e-71	1.97104e-69	GPI	stable	68.7053
ENSG00000166441	22713.7	-0.492637	0.027752	-17.7514	1.68104e-70	7.39508e-69	RPL27A	stable	68.1311
ENSG00000006118	9247.73	0.57069	0.0322906	17.6736	6.70216e-70	2.87958e-68	TMEM132A	stable	67.5407
ENSG00000113657	10363.8	0.491612	0.0279147	17.6112	2.02065e-69	8.63142e-68	DPYSL3	stable	67.0639
ENSG00000071127	5364.2	0.577525	0.0332536	17.3673	1.45998e-67	6.02681e-66	WDR1	stable	65.2199
ENSG00000065911	5118.18	0.569038	0.0328742	17.3096	3.98428e-67	1.622e-65	MTHFD2	stable	64.7899
ENSG00000167325	5322.04	0.572174	0.0330761	17.2987	4.81214e-67	1.94826e-65	RRM1	stable	64.7104
ENSG00000131473	16644	0.458299	0.0268916	17.0425	3.97659e-65	1.53411e-63	ACLY	stable	62.8141
ENSG00000096384	37092.7	0.435315	0.0262197	16.6026	6.67451e-62	2.43471e-60	HSP90AB1	stable	59.6136
ENSG00000118181	9707.25	-0.502674	0.0303396	-16.5683	1.18194e-61	4.25876e-60	RPS25	stable	59.3707
ENSG00000188976	5212.54	0.547068	0.0330377	16.5589	1.38153e-61	4.95367e-60	NOC2L	stable	59.3051
ENSG00000143799	9720.55	0.456763	0.0276155	16.5401	1.88782e-61	6.73626e-60	PARP1	stable	59.1716
ENSG00000135624	9885.96	0.479	0.0290537	16.4867	4.56959e-61	1.61492e-59	CCT7	stable	58.7919
ENSG00000206503	12485.2	-0.471451	0.0286027	-16.4827	4.88258e-61	1.71729e-59	HLA-A	stable	58.7652
ENSG00000143549	9386.39	0.493334	0.0299512	16.4713	5.90183e-61	2.06592e-59	TPM3	stable	58.6849
ENSG00000154978	4429.62	0.58001	0.0352944	16.4335	1.10119e-60	3.82743e-59	VOPP1	stable	58.4171
ENSG00000182718	10416	0.451575	0.0277194	16.2909	1.14521e-59	3.89769e-58	ANXA2	stable	57.4092
ENSG00000150093	5756.03	0.547479	0.0336519	16.2689	1.64097e-59	5.55931e-58	ITGB1	stable	57.255
ENSG00000150991	18460.4	-0.446491	0.0275003	-16.2358	2.81374e-59	9.46713e-58	UBC	stable	57.0238
ENSG00000148848	7303.36	0.583364	0.0360958	16.1616	9.41546e-59	3.11111e-57	ADAM12	stable	56.5071
ENSG00000142937	34196	-0.396925	0.0246056	-16.1315	1.53271e-58	5.04185e-57	RPS8	stable	56.2974
ENSG00000198961	6767.17	-0.528452	0.0327838	-16.1193	1.86598e-58	6.12447e-57	PJA2	stable	56.2129
ENSG00000168439	9969.49	0.455276	0.028311	16.0813	3.45298e-58	1.12332e-56	STIP1	stable	55.9495
ENSG00000167470	12723.4	0.455322	0.0284531	16.0026	1.22632e-57	3.94592e-56	MIDN	stable	55.4039
ENSG00000126457	9925.27	0.503898	0.0315196	15.9868	1.5784e-57	5.05671e-56	PRMT1	stable	55.2961
ENSG00000120802	4930.69	0.545025	0.0341398	15.9645	2.25784e-57	7.21774e-56	TMPO	stable	55.1416
ENSG00000118257	6054.34	0.542109	0.0340289	15.9309	3.86965e-57	1.23168e-55	NRP2	stable	54.9095
ENSG00000166226	6788.22	0.48209	0.0302877	15.917	4.82943e-57	1.53056e-55	CCT2	stable	54.8151
ENSG00000088325	8669.55	0.465378	0.0293605	15.8505	1.39528e-56	4.40304e-55	TPX2	stable	54.3562
ENSG00000067225	49077.6	0.371444	0.0234674	15.8281	1.99228e-56	6.25257e-55	PKM	stable	54.2039
ENSG00000099783	13362.5	0.500179	0.0316779	15.7895	3.67394e-56	1.14953e-54	HNRNPM	stable	53.9395
ENSG00000175166	6402.82	0.49863	0.0316762	15.7415	7.85724e-56	2.44804e-54	PSMD2	stable	53.6112
ENSG00000139289	15026.6	0.394845	0.025106	15.7271	9.86091e-56	3.06583e-54	PHLDA1	stable	53.5135
ENSG00000128050	8904.93	0.47213	0.0300925	15.6893	1.7908e-55	5.5327e-54	PAICS	stable	53.2571
ENSG00000108518	13108.5	0.543229	0.0349115	15.5601	1.35794e-54	4.12617e-53	PFN1	stable	52.3845
ENSG00000164543	5276.63	0.548099	0.0353012	15.5263	2.30166e-54	6.97935e-53	STK17A	stable	52.1562
ENSG00000116584	8522.1	0.468585	0.0302092	15.5114	2.90679e-54	8.77816e-53	ARHGEF2	stable	52.0566
ENSG00000187498	13046.8	0.426662	0.0275328	15.4965	3.66262e-54	1.10155e-52	COL4A1	stable	51.958
ENSG00000198034	23407	-0.428252	0.0277771	-15.4175	1.24905e-53	3.69623e-52	RPS4X	stable	51.4322
ENSG00000147065	9682.72	0.475183	0.0308981	15.379	2.26284e-53	6.66949e-52	MSN	stable	51.1759
ENSG00000152661	5761.43	0.526858	0.0342621	15.3773	2.32439e-53	6.83722e-52	GJA1	stable	51.1651
ENSG00000071082	13958.7	-0.449424	0.0293264	-15.3249	5.21229e-53	1.51805e-51	RPL31	stable	50.8187
ENSG00000189060	12862.2	-0.43671	0.0286057	-15.2665	1.27801e-52	3.67135e-51	H1F0	stable	50.4352
ENSG00000124126	10238.6	-0.440294	0.028915	-15.2271	2.33575e-52	6.67093e-51	PREX1	stable	50.1758
ENSG00000158710	5465.7	0.529146	0.034753	15.2259	2.38068e-52	6.78608e-51	TAGLN2	stable	50.1684
ENSG00000120889	5089.22	0.528345	0.0348284	15.17	5.59046e-52	1.57226e-50	TNFRSF10B	stable	49.8035
ENSG00000135069	6834.7	0.488842	0.0322341	15.1654	5.99752e-52	1.68353e-50	PSAT1	stable	49.7738
ENSG00000118816	6244.25	-0.499868	0.0329691	-15.1617	6.33709e-52	1.77547e-50	CCNI	stable	49.7507
ENSG00000106052	4365.74	-0.526908	0.0348462	-15.1209	1.17834e-51	3.28265e-50	TAX1BP1	stable	49.4838
ENSG00000109971	43202.6	0.370253	0.0244954	15.1152	1.28541e-51	3.57417e-50	HSPA8	stable	49.4468
ENSG00000138760	5048.48	-0.504651	0.0334076	-15.1059	1.48134e-51	4.11121e-50	SCARB2	stable	49.386
ENSG00000167460	13742.1	0.392522	0.0261464	15.0125	6.08459e-51	1.6855e-49	TPM4	stable	48.7733
ENSG00000113368	4495.19	0.524159	0.0349181	15.0111	6.21175e-51	1.7175e-49	LMNB1	stable	48.7651
ENSG00000189306	5529.71	0.541911	0.0361069	15.0085	6.45744e-51	1.78208e-49	RRP7A	stable	48.7491
ENSG00000197746	18650.4	-0.430153	0.0286713	-15.0029	7.0269e-51	1.93562e-49	PSAP	stable	48.7132
ENSG00000106628	11317.1	0.43136	0.0288254	14.9646	1.25062e-50	3.40903e-49	POLD2	stable	48.4674
ENSG00000119335	17482.3	0.410806	0.0274841	14.947	1.62807e-50	4.41858e-49	SET	stable	48.3547
ENSG00000198786	37495.8	0.43933	0.0294669	14.9093	2.86824e-50	7.72748e-49	MT-ND5	stable	48.112
ENSG00000124207	4519.85	0.526638	0.0353924	14.88	4.44665e-50	1.19146e-48	CSE1L	stable	47.9239
ENSG00000136156	3996.42	-0.560418	0.0377491	-14.8459	7.39976e-50	1.97555e-48	ITM2B	stable	47.7043
ENSG00000117519	14609	0.397183	0.0267944	14.8234	1.03468e-49	2.7474e-48	CNN3	stable	47.5611
ENSG00000123136	5137.48	0.572668	0.0386369	14.8218	1.05962e-49	2.80351e-48	DDX39A	stable	47.5523
ENSG00000071626	5559.77	0.485803	0.0328271	14.7988	1.49047e-49	3.91535e-48	DAZAP1	stable	47.4072
ENSG00000196576	11305.7	0.448997	0.0303975	14.7709	2.25761e-49	5.91999e-48	PLXNB2	stable	47.2277
ENSG00000100129	6215.04	-0.516187	0.0349547	-14.7673	2.38044e-49	6.23101e-48	EIF3L	stable	47.2054
ENSG00000165916	6508.13	0.471766	0.032001	14.7422	3.45181e-49	9.00341e-48	PSMC3	stable	47.0456
ENSG00000101384	25088.7	0.390394	0.0265589	14.6992	6.52464e-49	1.68987e-47	JAG1	stable	46.7721
ENSG00000166881	4112.29	0.538066	0.036668	14.674	9.4619e-49	2.43776e-47	NEMP1	stable	46.613
ENSG00000169032	3208.64	0.557856	0.0381343	14.6287	1.84227e-48	4.71346e-47	MAP2K1	stable	46.3267
ENSG00000137872	9422.1	-0.449635	0.0308288	-14.5849	3.5045e-48	8.95076e-47	SEMA6D	stable	46.0481
ENSG00000134684	6524.09	0.474602	0.0325501	14.5806	3.73032e-48	9.51103e-47	YARS	stable	46.0218
ENSG00000092096	4322.73	-0.544494	0.037422	-14.5501	5.83013e-48	1.47627e-46	SLC22A17	stable	45.8308
ENSG00000141522	5988.42	0.570593	0.0392542	14.5358	7.18193e-48	1.81544e-46	ARHGDIA	stable	45.741
ENSG00000172757	16317.5	0.391915	0.0272275	14.3941	5.63458e-47	1.38626e-45	CFL1	stable	44.8582
ENSG00000213639	14977.4	0.428992	0.0298035	14.394	5.64447e-47	1.38638e-45	PPP1CB	stable	44.8581
ENSG00000135446	71288.5	0.393983	0.0273862	14.3862	6.32081e-47	1.54991e-45	CDK4	stable	44.8097
ENSG00000125912	6276.59	0.548686	0.0382702	14.3372	1.28202e-46	3.11254e-45	NCLN	stable	44.5069
ENSG00000089169	5330.05	-0.490727	0.0343402	-14.2901	2.5207e-46	6.05997e-45	RPH3A	stable	44.2175
ENSG00000154380	6324.64	0.48046	0.0336572	14.2751	3.12757e-46	7.49448e-45	ENAH	stable	44.1253
ENSG00000121579	3630.42	0.574032	0.0402622	14.2573	4.03622e-46	9.64049e-45	NAA50	stable	44.0159
ENSG00000184009	53593.6	0.359101	0.0252108	14.244	4.88745e-46	1.16172e-44	ACTG1	stable	43.9349
ENSG00000072501	5384.63	0.478736	0.033636	14.2328	5.7299e-46	1.35977e-44	SMC1A	stable	43.8665
ENSG00000103342	3608.44	0.522524	0.0368062	14.1966	9.61414e-46	2.26694e-44	GSPT1	stable	43.6446
ENSG00000112306	11953.7	-0.422215	0.0297956	-14.1704	1.3975e-45	3.27946e-44	RPS12	stable	43.4842
ENSG00000147883	5832.04	0.45782	0.0323836	14.1374	2.23403e-45	5.22585e-44	CDKN2B	stable	43.2818
ENSG00000030582	3010.6	-0.575647	0.0408176	-14.1029	3.64467e-45	8.47185e-44	GRN	stable	43.072
ENSG00000090861	9260.88	0.396736	0.0281583	14.0895	4.40807e-45	1.02302e-43	AARS	stable	42.9901
ENSG00000142192	28358.7	-0.320846	0.0227921	-14.0771	5.25318e-45	1.21724e-43	APP	stable	42.9146
ENSG00000090621	5522.92	0.469739	0.0334414	14.0466	8.08121e-45	1.86083e-43	PABPC4	stable	42.7303
ENSG00000172009	6445.59	0.510186	0.0363645	14.0298	1.02473e-44	2.35593e-43	THOP1	stable	42.6278
ENSG00000075618	42928.5	-0.458774	0.0327342	-14.0151	1.26016e-44	2.89268e-43	FSCN1	stable	42.5387
ENSG00000125835	8437.2	0.517106	0.0369405	13.9984	1.5949e-44	3.65536e-43	SNRPB	stable	42.4371
ENSG00000160877	6586.12	0.433349	0.0309597	13.9972	1.62144e-44	3.71043e-43	NACC1	stable	42.4306
ENSG00000109475	6182.34	-0.545287	0.0389582	-13.9967	1.6327e-44	3.7304e-43	RPL34	stable	42.4282
ENSG00000119333	4847.6	0.541064	0.0386791	13.9886	1.83096e-44	4.17692e-43	WDR34	stable	42.3791
ENSG00000087087	7070.62	0.47303	0.0339472	13.9343	3.92165e-44	8.93252e-43	SRRT	stable	42.049
ENSG00000145425	14692.8	-0.381975	0.0274574	-13.9116	5.38786e-44	1.22343e-42	RPS3A	stable	41.9124
ENSG00000005893	4014.39	-0.529114	0.0380652	-13.9002	6.31667e-44	1.43213e-42	LAMP2	stable	41.844
ENSG00000108107	18349.3	-0.481208	0.034629	-13.8961	6.68842e-44	1.51409e-42	RPL28	stable	41.8198
ENSG00000175390	4169.21	-0.547057	0.0394213	-13.8772	8.70817e-44	1.96227e-42	EIF3F	stable	41.7072
ENSG00000115548	2743.81	-0.576417	0.0415446	-13.8746	9.02436e-44	2.03041e-42	KDM3A	stable	41.6924
ENSG00000136731	3565.96	0.55084	0.0397337	13.8633	1.05737e-43	2.36815e-42	UGGT1	stable	41.6256
ENSG00000129103	4966.05	-0.466241	0.033644	-13.8581	1.13662e-43	2.54179e-42	SUMF2	stable	41.5949
ENSG00000110107	4438.47	0.487222	0.0351859	13.8471	1.32438e-43	2.95718e-42	PRPF19	stable	41.5291
ENSG00000142864	15659.5	0.349595	0.0252565	13.8418	1.42661e-43	3.18063e-42	SERBP1	stable	41.4975
ENSG00000198888	37142.9	0.372608	0.0269479	13.827	1.75225e-43	3.89486e-42	MT-ND1	stable	41.4095
ENSG00000117318	3887.48	-0.535841	0.0388717	-13.7849	3.14284e-43	6.91284e-42	ID3	stable	41.1603
ENSG00000164587	12844.9	-0.450881	0.0329286	-13.6927	1.12318e-42	2.45584e-41	RPS14	stable	40.6098
ENSG00000130402	15298.4	0.377835	0.0276579	13.661	1.73545e-42	3.78894e-41	ACTN4	stable	40.4215
ENSG00000277443	11851.4	-0.416194	0.0304739	-13.6574	1.82429e-42	3.977e-41	MARCKS	stable	40.4004
ENSG00000233927	19836.4	-0.482485	0.0353314	-13.656	1.85939e-42	4.04755e-41	RPS28	stable	40.3928
ENSG00000167775	5905.77	0.579701	0.0424957	13.6414	2.27167e-42	4.93769e-41	CD320	stable	40.3065
ENSG00000163938	2555.96	0.578752	0.0424688	13.6277	2.74118e-42	5.94945e-41	GNL3	stable	40.2255
ENSG00000115484	6089.52	0.46018	0.0337904	13.6187	3.10223e-42	6.71329e-41	CCT4	stable	40.1731
ENSG00000010292	4446.46	0.464538	0.0341555	13.6007	3.96596e-42	8.54479e-41	NCAPD2	stable	40.0683
ENSG00000204386	3104.62	-0.546368	0.0402254	-13.5827	5.07367e-42	1.08836e-40	NEU1	stable	39.9632
ENSG00000122566	33078.3	0.372339	0.0274162	13.581	5.19098e-42	1.11191e-40	HNRNPA2B1	stable	39.9539
ENSG00000184575	5814.47	0.487254	0.0359019	13.5718	5.88525e-42	1.2588e-40	XPOT	stable	39.9
ENSG00000050405	5367.28	0.499902	0.0368432	13.5684	6.16886e-42	1.31754e-40	LIMA1	stable	39.8802
ENSG00000102316	3117.42	-0.556658	0.0410537	-13.5593	6.98448e-42	1.48959e-40	MAGED2	stable	39.8269
ENSG00000088247	16602.9	0.372093	0.0275135	13.524	1.12838e-41	2.39956e-40	KHSRP	stable	39.6199
ENSG00000189091	8509.59	0.393831	0.0291658	13.5032	1.49769e-41	3.17575e-40	SF3B3	stable	39.4982
ENSG00000151503	3198.48	0.55274	0.0410082	13.4788	2.08502e-41	4.40846e-40	NCAPD3	stable	39.3557
ENSG00000136802	4101.87	0.503416	0.0373692	13.4714	2.30405e-41	4.86457e-40	LRRC8A	stable	39.313
ENSG00000174748	18567.9	-0.431802	0.0320588	-13.469	2.37964e-41	5.01699e-40	RPL15	stable	39.2996
ENSG00000071575	22888.9	-0.329973	0.0245034	-13.4664	2.46508e-41	5.1823e-40	TRIB2	stable	39.2855
ENSG00000130309	6794.78	0.442698	0.0329109	13.4514	3.02131e-41	6.32458e-40	COLGALT1	stable	39.199
ENSG00000167721	2485.19	0.575288	0.0428819	13.4156	4.89732e-41	1.02371e-39	TSR1	stable	38.9898
ENSG00000105323	11223.1	0.383656	0.0285988	13.4151	4.93166e-41	1.02943e-39	HNRNPUL1	stable	38.9874
ENSG00000010810	4807.12	-0.458624	0.0342222	-13.4014	5.93468e-41	1.2353e-39	FYN	stable	38.9082
ENSG00000159131	3575.41	0.524096	0.0391434	13.3891	7.00175e-41	1.45536e-39	GART	stable	38.837
ENSG00000167522	4608.73	0.508863	0.0380216	13.3835	7.54961e-41	1.56702e-39	ANKRD11	stable	38.8049
ENSG00000105953	6252.01	0.448808	0.0335415	13.3807	7.84162e-41	1.62534e-39	OGDH	stable	38.7891
ENSG00000183010	4346.95	0.565394	0.0422699	13.3758	8.37317e-41	1.73308e-39	PYCR1	stable	38.7612
ENSG00000113140	21380	-0.331812	0.0248339	-13.3612	1.01876e-40	2.10568e-39	SPARC	stable	38.6766
ENSG00000167491	5354.48	0.481471	0.0362007	13.3	2.31382e-40	4.76239e-39	GATAD2A	stable	38.3222
ENSG00000160208	2932.73	0.569748	0.0428433	13.2984	2.3643e-40	4.85951e-39	RRP1B	stable	38.3134
ENSG00000167671	4204.21	-0.520947	0.0392024	-13.2887	2.69353e-40	5.51314e-39	UBXN6	stable	38.2586
ENSG00000141556	3204.72	0.521675	0.0392715	13.2838	2.87431e-40	5.875e-39	TBCD	stable	38.231
ENSG00000182095	7677.51	-0.448302	0.0337806	-13.271	3.40979e-40	6.95021e-39	TNRC18	stable	38.158
ENSG00000100401	4690.71	0.482726	0.0364985	13.2259	6.21698e-40	1.26198e-38	RANGAP1	stable	37.8989
ENSG00000179115	4897.99	0.48987	0.0371406	13.1896	1.00694e-39	2.02722e-38	FARSA	stable	37.6931
ENSG00000169504	11899.3	0.394766	0.0299839	13.1659	1.37834e-39	2.76739e-38	CLIC4	stable	37.5579
ENSG00000167004	8159.47	0.378906	0.0287941	13.1592	1.50769e-39	3.02297e-38	PDIA3	stable	37.5196
ENSG00000196419	11105.8	0.370982	0.0282716	13.1221	2.46033e-39	4.91965e-38	XRCC6	stable	37.3081
ENSG00000123989	7776.07	-0.531394	0.0405525	-13.1038	3.13003e-39	6.25031e-38	CHPF	stable	37.2041
ENSG00000062822	2695.21	0.582951	0.0444906	13.1028	3.17363e-39	6.3288e-38	POLD1	stable	37.1987
ENSG00000160211	3087.91	0.521018	0.0399097	13.0549	5.9589e-39	1.18191e-37	G6PD	stable	36.9274
ENSG00000161547	3983.13	0.465911	0.0356962	13.0521	6.17943e-39	1.22237e-37	SRSF2	stable	36.9128
ENSG00000147403	33026.5	-0.357154	0.0274532	-13.0095	1.07979e-38	2.12171e-37	RPL10	stable	36.6733
ENSG00000146729	2440.3	-0.556296	0.0429755	-12.9445	2.52406e-38	4.94643e-37	NIPSNAP2	stable	36.3057
ENSG00000136271	4905.82	0.454581	0.0351391	12.9366	2.79673e-38	5.4735e-37	DDX56	stable	36.2617
ENSG00000133872	8049.61	-0.374061	0.0290628	-12.8708	6.5705e-38	1.28081e-36	SARAF	stable	35.8925
ENSG00000083067	2643.29	-0.576314	0.0448446	-12.8514	8.45024e-38	1.64073e-36	TRPM3	stable	35.785
ENSG00000146731	17848.9	0.335751	0.0261301	12.8492	8.69389e-38	1.68581e-36	CCT6A	stable	35.7732
ENSG00000120438	3126.69	0.527599	0.0411058	12.8351	1.04206e-37	2.0127e-36	TCP1	stable	35.6962
ENSG00000143774	4771.73	-0.501524	0.0391519	-12.8097	1.447e-37	2.79116e-36	GUK1	stable	35.5542
ENSG00000104626	2331.85	0.582364	0.0455808	12.7765	2.21774e-37	4.26668e-36	ERI1	stable	35.3699
ENSG00000079246	9394.17	0.376513	0.0294728	12.7749	2.26385e-37	4.34973e-36	XRCC5	stable	35.3615
ENSG00000185215	4254.61	-0.44922	0.0351803	-12.7691	2.44017e-37	4.67631e-36	TNFAIP2	stable	35.3301
ENSG00000097021	4091.16	0.494957	0.0387751	12.7648	2.57807e-37	4.93416e-36	ACOT7	stable	35.3068
ENSG00000141580	3551.23	-0.494118	0.0387424	-12.7539	2.96381e-37	5.65772e-36	WDR45B	stable	35.2474
ENSG00000138018	2539.45	0.541039	0.0424221	12.7537	2.97232e-37	5.6593e-36	SELENOI	stable	35.2472
ENSG00000071564	11598.4	0.391808	0.0307279	12.7509	3.08265e-37	5.86181e-36	TCF3	stable	35.232
ENSG00000198830	11034	0.387691	0.030524	12.7012	5.82489e-37	1.10336e-35	HMGN2	stable	34.9573
ENSG00000103647	11050.7	0.426142	0.0335611	12.6975	6.10421e-37	1.15478e-35	CORO2B	stable	34.9375
ENSG00000105426	7504.38	-0.405789	0.032011	-12.6765	7.97815e-37	1.5035e-35	PTPRS	stable	34.8229
ENSG00000196642	5146.63	0.463153	0.0366563	12.635	1.35374e-36	2.53495e-35	RABL6	stable	34.596
ENSG00000131504	2630.14	0.530159	0.0419977	12.6235	1.56652e-36	2.92968e-35	DIAPH1	stable	34.5332
ENSG00000070961	10797.2	-0.373214	0.0295708	-12.6211	1.61643e-36	3.01918e-35	ATP2B1	stable	34.5201
ENSG00000155561	5823.59	0.436846	0.0346396	12.6112	1.83282e-36	3.4147e-35	NUP205	stable	34.4666
ENSG00000108671	3622.86	0.486573	0.0386281	12.5964	2.21115e-36	4.11435e-35	PSMD11	stable	34.3857
ENSG00000169180	3257.55	0.515266	0.0409379	12.5865	2.50446e-36	4.6484e-35	XPO6	stable	34.3327
ENSG00000108883	6235.17	0.420552	0.0334332	12.5789	2.75882e-36	5.10123e-35	EFTUD2	stable	34.2923
ENSG00000179604	8710.8	0.368439	0.0293499	12.5533	3.81187e-36	7.03954e-35	CDC42EP4	stable	34.1525
ENSG00000085872	3409.26	0.526483	0.0419631	12.5463	4.16388e-36	7.67039e-35	CHERP	stable	34.1152
ENSG00000231500	19447.3	-0.359388	0.0286467	-12.5455	4.2063e-36	7.73886e-35	RPS18	stable	34.1113
ENSG00000112118	4449.02	0.431938	0.0344376	12.5426	4.36403e-36	8.00905e-35	MCM3	stable	34.0964
ENSG00000012660	3834.67	0.472198	0.0376964	12.5264	5.35651e-36	9.81827e-35	ELOVL5	stable	34.008
ENSG00000163541	2317.87	-0.569536	0.0454759	-12.5239	5.52536e-36	1.01152e-34	SUCLG1	stable	33.995
ENSG00000132341	10629.1	0.356244	0.0284748	12.5109	6.51038e-36	1.18742e-34	RAN	stable	33.9254
ENSG00000162244	19661.7	-0.40813	0.0327314	-12.4691	1.10119e-35	1.98876e-34	RPL29	stable	33.7014
ENSG00000074181	6040.95	-0.480894	0.0385903	-12.4615	1.21045e-35	2.18074e-34	NOTCH3	stable	33.6614
ENSG00000089154	6368.66	0.41579	0.0334073	12.4461	1.46907e-35	2.63698e-34	GCN1	stable	33.5789
ENSG00000179431	4301.46	0.554315	0.0445824	12.4335	1.71909e-35	3.08203e-34	FJX1	stable	33.5112
ENSG00000100647	2325.34	-0.53236	0.042902	-12.4087	2.34293e-35	4.18518e-34	SUSD6	stable	33.3783
ENSG00000108106	9614.54	0.459841	0.0370658	12.4061	2.4217e-35	4.32064e-34	UBE2S	stable	33.3645
ENSG00000188807	2207.19	0.557766	0.0449962	12.3958	2.75246e-35	4.90483e-34	TMEM201	stable	33.3094
ENSG00000134324	2280.07	0.545397	0.0442146	12.3352	5.85244e-35	1.03913e-33	LPIN1	stable	32.9833
ENSG00000152952	2756.77	-0.558837	0.04538	-12.3146	7.55914e-35	1.33732e-33	PLOD2	stable	32.8738
ENSG00000130508	7460.58	0.427774	0.0347848	12.2977	9.31449e-35	1.6459e-33	PXDN	stable	32.7836
ENSG00000204574	3028.94	0.496898	0.0405322	12.2593	1.49702e-34	2.63579e-33	ABCF1	stable	32.5791
ENSG00000065000	11468.8	0.362546	0.0296002	12.2481	1.72019e-34	3.01433e-33	AP3D1	stable	32.5208
ENSG00000089685	3238.41	0.493027	0.0402946	12.2356	2.00685e-34	3.51247e-33	BIRC5	stable	32.4544
ENSG00000006468	5773.06	-0.398694	0.0326328	-12.2176	2.50465e-34	4.37853e-33	ETV1	stable	32.3587
ENSG00000163660	3065.42	-0.511963	0.0419173	-12.2136	2.62839e-34	4.58941e-33	CCNL1	stable	32.3382
ENSG00000168411	2082.98	0.549576	0.0450072	12.2108	2.72034e-34	4.73872e-33	RFWD3	stable	32.3243
ENSG00000148516	3328.43	-0.493995	0.0406927	-12.1397	6.51025e-34	1.12608e-32	ZEB1	stable	31.9484
ENSG00000089280	9580.78	0.393563	0.0324524	12.1274	7.56288e-34	1.30508e-32	FUS	stable	31.8844
ENSG00000275700	2030.27	0.545526	0.0449966	12.1237	7.90823e-34	1.35832e-32	AATF	stable	31.867
ENSG00000160087	2564.09	0.577882	0.0477276	12.1079	9.58829e-34	1.64497e-32	UBE2J2	stable	31.7838
ENSG00000149639	7265.7	0.438514	0.036218	12.1076	9.62229e-34	1.64888e-32	SOGA1	stable	31.7828
ENSG00000168090	6009.85	0.406415	0.0335818	12.1022	1.02769e-33	1.75901e-32	COPS6	stable	31.7547
ENSG00000134986	2771.36	-0.515495	0.0426011	-12.1005	1.04944e-33	1.79415e-32	NREP	stable	31.7461
ENSG00000060982	9030.19	0.398519	0.0329668	12.0885	1.21462e-33	2.07415e-32	BCAT1	stable	31.6832
ENSG00000153879	2735.17	0.54963	0.0454788	12.0854	1.26126e-33	2.1513e-32	CEBPG	stable	31.6673
ENSG00000129347	2151.46	0.57433	0.0476248	12.0595	1.7292e-33	2.93247e-32	KRI1	stable	31.5328
ENSG00000128849	2229.93	0.578589	0.0480024	12.0533	1.86299e-33	3.15573e-32	CGNL1	stable	31.5009
ENSG00000107937	2170.18	0.58026	0.0481779	12.0441	2.08327e-33	3.52481e-32	GTPBP4	stable	31.4529
ENSG00000130726	15080.6	0.446077	0.0370988	12.024	2.65729e-33	4.48061e-32	TRIM28	stable	31.3487
ENSG00000205531	5653.65	0.392522	0.0326448	12.024	2.65694e-33	4.48061e-32	NAP1L4	stable	31.3487
ENSG00000171208	3347.32	0.467365	0.0389447	12.0008	3.52064e-33	5.91605e-32	NETO2	stable	31.228
ENSG00000105372	24834.6	-0.375239	0.0313011	-11.9881	4.10434e-33	6.86557e-32	RPS19	stable	31.1633
ENSG00000181163	12876.5	0.329197	0.0275082	11.9672	5.27489e-33	8.81361e-32	NPM1	stable	31.0548
ENSG00000163468	12096.9	0.346785	0.0289791	11.9667	5.30724e-33	8.85762e-32	CCT3	stable	31.0527
ENSG00000162607	3077.94	0.516831	0.0432305	11.9552	6.09685e-33	1.01525e-31	USP1	stable	30.9934
ENSG00000071462	3149.08	0.473636	0.0396936	11.9323	8.03184e-33	1.33595e-31	BUD23	stable	30.8742
ENSG00000103423	2215.83	0.553806	0.0464142	11.9318	8.07838e-33	1.34218e-31	DNAJA3	stable	30.8722
ENSG00000213024	3689.72	0.46654	0.0391101	11.9289	8.36715e-33	1.38859e-31	NUP62	stable	30.8574
ENSG00000058804	2570.95	0.521687	0.0437645	11.9203	9.27617e-33	1.53599e-31	NDC1	stable	30.8136
ENSG00000113810	3883.05	0.531475	0.0445967	11.9174	9.61031e-33	1.58953e-31	SMC4	stable	30.7987
ENSG00000187079	5017.78	0.444691	0.0373277	11.9132	1.01072e-32	1.66984e-31	TEAD1	stable	30.7773
ENSG00000275342	3904.4	0.44398	0.0373161	11.8978	1.21507e-32	2.00295e-31	PRAG1	stable	30.6983
ENSG00000110700	9118.01	-0.418868	0.035221	-11.8926	1.2936e-32	2.13003e-31	RPS13	stable	30.6716
ENSG00000007237	3565.15	-0.434302	0.0365458	-11.8838	1.4374e-32	2.36416e-31	GAS7	stable	30.6263
ENSG00000146648	12058.8	0.392957	0.0331116	11.8676	1.74297e-32	2.86356e-31	EGFR	stable	30.5431
ENSG00000123349	3206.16	-0.492525	0.0415086	-11.8656	1.78579e-32	2.93065e-31	PFDN5	stable	30.533
ENSG00000135365	1900.29	-0.562194	0.0474943	-11.8371	2.51058e-32	4.11093e-31	PHF21A	stable	30.3861
ENSG00000127663	3065.06	-0.506059	0.0427718	-11.8316	2.67923e-32	4.37736e-31	KDM4B	stable	30.3588
ENSG00000165280	9933.9	0.339757	0.028802	11.7963	4.07972e-32	6.62877e-31	VCP	stable	30.1786
ENSG00000122687	2349.29	0.520472	0.0441305	11.7939	4.19507e-32	6.80868e-31	MRM2	stable	30.1669
ENSG00000105197	3797.35	0.460731	0.0390781	11.79	4.39572e-32	7.12648e-31	TIMM50	stable	30.1471
ENSG00000196363	2179.5	0.536505	0.045507	11.7895	4.42079e-32	7.15139e-31	WDR5	stable	30.1456
ENSG00000183283	3967.43	-0.445435	0.0377844	-11.7889	4.45561e-32	7.19981e-31	DAZAP2	stable	30.1427
ENSG00000143061	2753.49	-0.529695	0.0449332	-11.7885	4.47376e-32	7.22123e-31	IGSF3	stable	30.1414
ENSG00000164032	6650.8	0.427901	0.0363118	11.7841	4.71536e-32	7.60287e-31	H2AFZ	stable	30.119
ENSG00000090097	4604.24	0.447768	0.0380527	11.767	5.77155e-32	9.29566e-31	PCBP4	stable	30.0317
ENSG00000125977	3437.09	0.529749	0.0451199	11.7409	7.86151e-32	1.25793e-30	EIF2S2	stable	29.9003
ENSG00000136527	4924.44	0.416858	0.0356567	11.6909	1.4193e-31	2.25878e-30	TRA2B	stable	29.6461
ENSG00000164930	2806.26	-0.471687	0.0403826	-11.6804	1.60472e-31	2.55111e-30	FZD6	stable	29.5933
ENSG00000187678	12763.4	-0.315675	0.0270272	-11.6799	1.61499e-31	2.56466e-30	SPRY4	stable	29.591
ENSG00000145703	2111.12	0.538799	0.0461532	11.6742	1.72761e-31	2.73761e-30	IQGAP2	stable	29.5626
ENSG00000106244	5860.12	0.400492	0.0343277	11.6667	1.88542e-31	2.98127e-30	PDAP1	stable	29.5256
ENSG00000082641	6068.52	0.386448	0.0331664	11.6518	2.24634e-31	3.54057e-30	NFE2L1	stable	29.4509
ENSG00000143641	2872.51	0.462961	0.0397402	11.6497	2.30338e-31	3.62659e-30	GALNT2	stable	29.4405
ENSG00000148843	2541.74	0.488122	0.041904	11.6486	2.33322e-31	3.66966e-30	PDCD11	stable	29.4354
ENSG00000090889	1848.24	0.554106	0.0475802	11.6457	2.41231e-31	3.79e-30	KIF4A	stable	29.4214
ENSG00000100139	3125.97	0.511689	0.0439631	11.6391	2.60891e-31	4.09451e-30	MICALL1	stable	29.3878
ENSG00000156976	6904.09	-0.38977	0.0335447	-11.6194	3.28343e-31	5.14765e-30	EIF4A2	stable	29.2884
ENSG00000071655	6458.26	0.45161	0.0389112	11.6062	3.83342e-31	5.98444e-30	MBD3	stable	29.223
ENSG00000122642	8676.25	-0.35063	0.0302325	-11.5978	4.22759e-31	6.57888e-30	FKBP9	stable	29.1818
ENSG00000047849	8091.04	0.374168	0.0322759	11.5928	4.48323e-31	6.96935e-30	MAP4	stable	29.1568
ENSG00000167526	36402.2	-0.369794	0.0319013	-11.5918	4.53368e-31	7.04034e-30	RPL13	stable	29.1524
ENSG00000143476	1905.81	0.541664	0.0467407	11.5887	4.70212e-31	7.29422e-30	DTL	stable	29.137
ENSG00000179222	6584.55	-0.357293	0.0308399	-11.5854	4.88702e-31	7.57309e-30	MAGED1	stable	29.1207
ENSG00000108055	2492.1	0.514517	0.0444252	11.5816	5.10563e-31	7.90353e-30	SMC3	stable	29.1022
ENSG00000101220	2091.39	0.539109	0.0465541	11.5803	5.1882e-31	8.02293e-30	C20orf27	stable	29.0957
ENSG00000111602	3655.68	0.420695	0.0363341	11.5785	5.29528e-31	8.17136e-30	TIMELESS	stable	29.0877
ENSG00000100097	10111.7	-0.386862	0.0334726	-11.5576	6.75917e-31	1.03977e-29	LGALS1	stable	28.9831
ENSG00000147677	5715.85	-0.387326	0.0335245	-11.5535	7.08657e-31	1.089e-29	EIF3H	stable	28.963
ENSG00000198554	1864.35	0.571461	0.0495082	11.5427	8.03176e-31	1.22912e-29	WDHD1	stable	28.9104
ENSG00000135535	6949.95	-0.442183	0.0383491	-11.5305	9.2644e-31	1.41628e-29	CD164	stable	28.8489
ENSG00000132670	5450.86	-0.427408	0.0370744	-11.5284	9.48843e-31	1.44903e-29	PTPRA	stable	28.8389
ENSG00000124795	5466.17	0.423779	0.0368345	11.505	1.24542e-30	1.89605e-29	DEK	stable	28.7222
ENSG00000114850	4172.92	0.482416	0.0419338	11.5042	1.25606e-30	1.91027e-29	SSR3	stable	28.7189
ENSG00000183255	6802.95	-0.35323	0.0307234	-11.4971	1.36404e-30	2.07023e-29	PTTG1IP	stable	28.684
ENSG00000010295	2492.33	-0.51402	0.0447251	-11.4929	1.43288e-30	2.17247e-29	IFFO1	stable	28.663
ENSG00000163565	2096.11	-0.546996	0.0476871	-11.4705	1.85521e-30	2.80412e-29	IFI16	stable	28.5522
ENSG00000111678	1657.32	-0.572662	0.0499402	-11.4669	1.93362e-30	2.91965e-29	C12orf57	stable	28.5347
ENSG00000135316	4900.52	0.401223	0.0349899	11.4668	1.93619e-30	2.92054e-29	SYNCRIP	stable	28.5345
ENSG00000138095	5525.03	0.382575	0.0333667	11.4658	1.95975e-30	2.95305e-29	LRPPRC	stable	28.5297
ENSG00000101224	6621.3	-0.382451	0.0333811	-11.4571	2.16612e-30	3.25735e-29	CDC25B	stable	28.4871
ENSG00000142949	9279	0.373114	0.0325752	11.4539	2.247e-30	3.37554e-29	PTPRF	stable	28.4717
ENSG00000132646	6244.81	0.391242	0.0341701	11.4499	2.35528e-30	3.53459e-29	PCNA	stable	28.4517
ENSG00000137449	1785.73	-0.541362	0.0473006	-11.4451	2.48674e-30	3.72809e-29	CPEB2	stable	28.4285
ENSG00000105701	7709.77	-0.453138	0.0395955	-11.4442	2.51449e-30	3.76585e-29	FKBP8	stable	28.4241
ENSG00000182481	6197.09	0.356994	0.0312041	11.4406	2.62047e-30	3.91265e-29	KPNA2	stable	28.4075
ENSG00000012963	2047.76	0.521622	0.0456111	11.4363	2.75405e-30	4.10794e-29	UBR7	stable	28.3864
ENSG00000130517	3730.42	0.440851	0.0385563	11.4339	2.82952e-30	4.21624e-29	PGPEP1	stable	28.3751
ENSG00000156482	3203.84	-0.462728	0.0404973	-11.4261	3.09622e-30	4.60899e-29	RPL30	stable	28.3364
ENSG00000174938	2512.45	-0.51197	0.0448451	-11.4164	3.46183e-30	5.13766e-29	SEZ6L2	stable	28.2892
ENSG00000114346	1839.25	0.562189	0.0493061	11.402	4.0849e-30	6.0441e-29	ECT2	stable	28.2187
ENSG00000206053	2908.66	0.491996	0.0432582	11.3735	5.66826e-30	8.35332e-29	JPT2	stable	28.0781
ENSG00000100462	2518.37	0.485482	0.0426867	11.3732	5.6896e-30	8.37639e-29	PRMT5	stable	28.0769
ENSG00000168056	3310.79	-0.483782	0.0425724	-11.3638	6.3359e-30	9.31858e-29	LTBP3	stable	28.0307
ENSG00000171444	1862.44	0.572162	0.0503503	11.3636	6.34672e-30	9.32519e-29	MCC	stable	28.0303
ENSG00000185189	2144.77	-0.529117	0.0465902	-11.3568	6.85989e-30	1.00591e-28	NRBP2	stable	27.9974
ENSG00000100505	5319.49	-0.369422	0.0325694	-11.3426	8.06944e-30	1.18093e-28	TRIM9	stable	27.9278
ENSG00000174437	10614.9	0.324284	0.0285977	11.3395	8.3623e-30	1.22257e-28	ATP2A2	stable	27.9127
ENSG00000100219	4780.33	0.388805	0.0343534	11.3178	1.07136e-29	1.56324e-28	XBP1	stable	27.806
ENSG00000165527	7148.67	0.379172	0.033506	11.3165	1.08673e-29	1.58409e-28	ARF6	stable	27.8002
ENSG00000064651	3395.9	0.421856	0.0372947	11.3114	1.15216e-29	1.6778e-28	SLC12A2	stable	27.7753
ENSG00000135074	9576.7	-0.33559	0.0296806	-11.3067	1.21554e-29	1.76661e-28	ADAM19	stable	27.7529
ENSG00000137124	1884.96	0.561417	0.0496658	11.3039	1.25513e-29	1.82235e-28	ALDH1B1	stable	27.7394
ENSG00000127616	16746.6	0.320787	0.0284144	11.2896	1.47699e-29	2.14025e-28	SMARCA4	stable	27.6695
ENSG00000100726	2130.53	0.584304	0.051773	11.2859	1.54082e-29	2.23055e-28	TELO2	stable	27.6516
ENSG00000135829	8556.4	0.357357	0.0316705	11.2836	1.58161e-29	2.28511e-28	DHX9	stable	27.6411
ENSG00000167085	3020.7	0.484001	0.0429867	11.2593	2.08375e-29	2.99592e-28	PHB	stable	27.5235
ENSG00000142002	2428.59	0.506818	0.0450984	11.238	2.65217e-29	3.79466e-28	DPP9	stable	27.4208
ENSG00000149273	25069.8	-0.32637	0.0290479	-11.2356	2.72665e-29	3.89744e-28	RPS3	stable	27.4092
ENSG00000198755	10027.4	-0.329625	0.0293461	-11.2323	2.82866e-29	4.03934e-28	RPL10A	stable	27.3937
ENSG00000196526	2181.45	0.50456	0.0449937	11.214	3.48009e-29	4.95518e-28	AFAP1	stable	27.3049
ENSG00000162981	2319.94	0.487457	0.04352	11.2008	4.04261e-29	5.74503e-28	FAM84A	stable	27.2407
ENSG00000171067	1687.03	0.568419	0.0508014	11.189	4.61451e-29	6.55145e-28	C11orf24	stable	27.1837
ENSG00000143621	3358.96	0.42015	0.0375513	11.1887	4.63179e-29	6.56966e-28	ILF2	stable	27.1825
ENSG00000100258	3574.64	0.450936	0.0403294	11.1813	5.03341e-29	7.13244e-28	LMF2	stable	27.1468
ENSG00000114999	2974.14	0.460277	0.0412168	11.1672	5.90081e-29	8.35353e-28	TTL	stable	27.0781
ENSG00000104763	3117.41	-0.437587	0.0391953	-11.1643	6.09951e-29	8.62653e-28	ASAH1	stable	27.0642
ENSG00000168393	1740.21	0.573878	0.0514115	11.1624	6.2252e-29	8.79586e-28	DTYMK	stable	27.0557
ENSG00000181588	4390.27	0.433963	0.0388824	11.1609	6.33344e-29	8.94022e-28	MEX3D	stable	27.0487
ENSG00000109685	4585.16	0.397371	0.0356666	11.1413	7.89959e-29	1.11084e-27	NSD2	stable	26.9543
ENSG00000104290	5816.24	-0.359744	0.0323638	-11.1156	1.0531e-28	1.47384e-27	FZD3	stable	26.8315
ENSG00000196465	2242.13	-0.534099	0.0480728	-11.1102	1.11883e-28	1.56286e-27	MYL6B	stable	26.8061
ENSG00000136699	2347.6	0.535106	0.0482174	11.0978	1.28619e-28	1.79155e-27	SMPD4	stable	26.7468
ENSG00000133313	4287.27	0.423686	0.0381999	11.0913	1.38282e-28	1.92433e-27	CNDP2	stable	26.7157
ENSG00000134824	17280.2	0.305813	0.027574	11.0906	1.39306e-28	1.93675e-27	FADS2	stable	26.7129
ENSG00000120705	3531.15	0.452171	0.0408125	11.0792	1.5822e-28	2.19556e-27	ETF1	stable	26.6585
ENSG00000174721	3099.78	0.442639	0.0399542	11.0787	1.59212e-28	2.20726e-27	FGFBP3	stable	26.6561
ENSG00000006652	4267.96	0.399371	0.0360814	11.0686	1.78093e-28	2.46669e-27	IFRD1	stable	26.6079
ENSG00000153207	2251.62	0.477197	0.0431617	11.056	2.05016e-28	2.82366e-27	AHCTF1	stable	26.5492
ENSG00000198805	1743.22	0.571415	0.0516954	11.0535	2.10845e-28	2.90124e-27	PNP	stable	26.5374
ENSG00000100297	3973.54	0.404008	0.0365908	11.0412	2.41663e-28	3.31291e-27	MCM5	stable	26.4798
ENSG00000255690	2241.54	-0.531273	0.0481651	-11.0302	2.73106e-28	3.73701e-27	TRIL	stable	26.4275
ENSG00000118705	7754.71	0.329154	0.0298427	11.0296	2.75062e-28	3.76028e-27	RPN2	stable	26.4248
ENSG00000160310	2925.8	-0.438127	0.0397271	-11.0284	2.78688e-28	3.80633e-27	PRMT2	stable	26.4195
ENSG00000158417	3138.72	0.496929	0.0450653	11.0269	2.83532e-28	3.86891e-27	EIF5B	stable	26.4124
ENSG00000063244	7234.41	0.346284	0.0314273	11.0186	3.10932e-28	4.23885e-27	U2AF2	stable	26.3728
ENSG00000155506	6255.28	0.381642	0.0346554	11.0125	3.32753e-28	4.53214e-27	LARP1	stable	26.3437
ENSG00000005100	1776.74	0.564634	0.0512843	11.0099	3.42419e-28	4.65949e-27	DHX33	stable	26.3317
ENSG00000106397	6243.25	0.39292	0.035694	11.008	3.49611e-28	4.75297e-27	PLOD3	stable	26.323
ENSG00000128512	1911.04	-0.538794	0.0489501	-11.007	3.53567e-28	4.80232e-27	DOCK4	stable	26.3185
ENSG00000237649	1914.54	0.54	0.049097	10.9986	3.88033e-28	5.2656e-27	KIFC1	stable	26.2786
ENSG00000172115	7110.34	0.381282	0.0346843	10.9929	4.13338e-28	5.60382e-27	CYCS	stable	26.2515
ENSG00000124571	3235.93	0.438287	0.0398724	10.9922	4.16529e-28	5.64191e-27	XPO5	stable	26.2486
ENSG00000139641	3811.98	0.405382	0.0369033	10.985	4.51378e-28	6.09712e-27	ESYT1	stable	26.2149
ENSG00000111276	2748.87	-0.446801	0.0407458	-10.9656	5.59502e-28	7.54381e-27	CDKN1B	stable	26.1224
ENSG00000092421	7899.71	-0.358061	0.0326639	-10.962	5.8202e-28	7.84024e-27	SEMA6A	stable	26.1057
ENSG00000196262	50327.2	0.320749	0.0293383	10.9328	8.03529e-28	1.08044e-26	PPIA	stable	25.9664
ENSG00000164056	6000.66	-0.353232	0.0323126	-10.9317	8.13132e-28	1.09235e-26	SPRY1	stable	25.9616
ENSG00000144320	2223.51	-0.48096	0.0440038	-10.93	8.28808e-28	1.1124e-26	LNPK	stable	25.9537
ENSG00000126461	4342.77	0.436538	0.0399725	10.921	9.15191e-28	1.22722e-26	SCAF1	stable	25.9111
ENSG00000179409	2086.89	0.542944	0.049727	10.9185	9.40541e-28	1.26007e-26	GEMIN4	stable	25.8996
ENSG00000182899	6475.08	-0.439544	0.040271	-10.9146	9.81199e-28	1.31335e-26	RPL35A	stable	25.8816
ENSG00000123384	5397.76	-0.44516	0.0408085	-10.9085	1.04973e-27	1.40253e-26	LRP1	stable	25.8531
ENSG00000174444	42828.6	-0.263218	0.0241553	-10.8969	1.1921e-27	1.5913e-26	RPL4	stable	25.7982
ENSG00000136810	1970.38	0.51365	0.0471435	10.8955	1.21164e-27	1.61447e-26	TXN	stable	25.792
ENSG00000050820	3415.25	0.453098	0.0415935	10.8935	1.2381e-27	1.64674e-26	BCAR1	stable	25.7834
ENSG00000134440	7806.98	0.333709	0.0306392	10.8916	1.26433e-27	1.67859e-26	NARS	stable	25.7751
ENSG00000038427	3457.61	0.52249	0.0479812	10.8895	1.29401e-27	1.71491e-26	VCAN	stable	25.7658
ENSG00000170540	4756.18	-0.38058	0.0349623	-10.8855	1.35208e-27	1.78865e-26	ARL6IP1	stable	25.7475
ENSG00000173898	3537.66	0.422514	0.0388251	10.8825	1.3967e-27	1.84602e-26	SPTBN2	stable	25.7338
ENSG00000117461	1698.34	-0.543145	0.0499287	-10.8784	1.46091e-27	1.92916e-26	PIK3R3	stable	25.7146
ENSG00000129351	28221.8	0.277119	0.0254898	10.8718	1.57147e-27	2.07145e-26	ILF3	stable	25.6837
ENSG00000152256	1495.98	-0.559542	0.0514728	-10.8706	1.591e-27	2.09531e-26	PDK1	stable	25.6788
ENSG00000005007	6164.26	0.349025	0.0321467	10.8573	1.84204e-27	2.42377e-26	UPF1	stable	25.6155
ENSG00000141905	9136.02	0.379409	0.0349463	10.8569	1.84902e-27	2.43077e-26	NFIC	stable	25.6143
ENSG00000270885	2111.74	-0.567666	0.0523443	-10.8449	2.10964e-27	2.77092e-26	RASL10B	stable	25.5574
ENSG00000114686	2460.41	0.493695	0.0455494	10.8387	2.2575e-27	2.9625e-26	MRPL3	stable	25.5283
ENSG00000169100	12187.4	-0.317251	0.0293404	-10.8128	2.99455e-27	3.91924e-26	SLC25A6	stable	25.4068
ENSG00000179335	1407.15	-0.573408	0.0530936	-10.7999	3.44437e-27	4.49997e-26	CLK3	stable	25.3468
ENSG00000204469	10241.8	0.329505	0.0305318	10.7922	3.74664e-27	4.89054e-26	PRRC2A	stable	25.3106
ENSG00000125166	2254.98	0.476758	0.0442224	10.7809	4.23588e-27	5.5145e-26	GOT2	stable	25.2585
ENSG00000141858	2852.65	0.453453	0.0420741	10.7775	4.39845e-27	5.711e-26	SAMD1	stable	25.2433
ENSG00000126602	2444.76	0.498587	0.0462839	10.7724	4.64956e-27	6.03174e-26	TRAP1	stable	25.2196
ENSG00000150768	1887.54	0.568073	0.0527359	10.772	4.66531e-27	6.04686e-26	DLAT	stable	25.2185
ENSG00000162909	3312.86	0.465764	0.043271	10.7639	5.09747e-27	6.59539e-26	CAPN2	stable	25.1808
ENSG00000134001	3489.87	0.483451	0.0449165	10.7633	5.12946e-27	6.63095e-26	EIF2S1	stable	25.1784
ENSG00000067057	4106.65	0.399443	0.0371932	10.7397	6.62828e-27	8.54602e-26	PFKP	stable	25.0682
ENSG00000101346	4411.44	0.386378	0.0360273	10.7246	7.80369e-27	1.00439e-25	POFUT1	stable	24.9981
ENSG00000095002	2603.09	0.457531	0.0426775	10.7207	8.14084e-27	1.04596e-25	MSH2	stable	24.9805
ENSG00000119285	2035.9	0.510197	0.0476312	10.7114	8.9994e-27	1.15426e-25	HEATR1	stable	24.9377
ENSG00000116237	3625.22	0.423899	0.0395781	10.7104	9.09293e-27	1.16524e-25	ICMT	stable	24.9336
ENSG00000130713	1567.91	0.555612	0.0519179	10.7017	9.98752e-27	1.27877e-25	EXOSC2	stable	24.8932
ENSG00000183520	1399.31	0.584922	0.0546701	10.6991	1.02738e-26	1.31428e-25	UTP11	stable	24.8813
ENSG00000124356	1984.44	0.501949	0.0469237	10.6971	1.04984e-26	1.34068e-25	STAMBP	stable	24.8727
ENSG00000122406	19971.8	-0.278531	0.026057	-10.6893	1.14252e-26	1.45526e-25	RPL5	stable	24.8371
ENSG00000122034	2257.69	0.494782	0.0463327	10.6789	1.27793e-26	1.62213e-25	GTF3A	stable	24.7899
ENSG00000126878	4254.68	-0.376938	0.0353001	-10.6781	1.28885e-26	1.63458e-25	AIF1L	stable	24.7866
ENSG00000131773	1420.08	0.575976	0.0540756	10.6513	1.71932e-26	2.17304e-25	KHDRBS3	stable	24.6629
ENSG00000182742	1697.9	0.565357	0.0531179	10.6434	1.87099e-26	2.36271e-25	HOXB4	stable	24.6266
ENSG00000076716	1928.26	0.54514	0.0513582	10.6145	2.55241e-26	3.2122e-25	GPC4	stable	24.4932
ENSG00000111581	2156.89	0.492159	0.0464031	10.6062	2.78944e-26	3.50751e-25	NUP107	stable	24.455
ENSG00000104805	5076.83	-0.375709	0.0354314	-10.6039	2.8592e-26	3.59216e-25	NUCB1	stable	24.4446
ENSG00000089063	2309.63	-0.47638	0.0449569	-10.5964	3.09786e-26	3.88538e-25	TMEM230	stable	24.4106
ENSG00000089157	64951.1	-0.276443	0.0260932	-10.5945	3.1617e-26	3.96207e-25	RPLP0	stable	24.4021
ENSG00000087077	4579.94	0.443086	0.0418459	10.5885	3.36858e-26	4.21774e-25	TRIP6	stable	24.3749
ENSG00000089195	1439.85	0.553146	0.052242	10.5882	3.38205e-26	4.23101e-25	TRMT6	stable	24.3736
ENSG00000130522	7600.14	0.35338	0.0334044	10.5789	3.7342e-26	4.66364e-25	JUND	stable	24.3313
ENSG00000116171	2293.38	-0.472022	0.0446377	-10.5745	3.91188e-26	4.87727e-25	SCP2	stable	24.3118
ENSG00000111540	3105.94	-0.421906	0.0399131	-10.5706	4.07796e-26	5.08004e-25	RAB5B	stable	24.2941
ENSG00000115310	10407.2	0.333786	0.0315819	10.5689	4.15253e-26	5.1642e-25	RTN4	stable	24.287
ENSG00000166925	2139.58	-0.47938	0.0453739	-10.5651	4.32516e-26	5.37436e-25	TSC22D4	stable	24.2697
ENSG00000132002	5959.58	0.337088	0.0319133	10.5626	4.44013e-26	5.51257e-25	DNAJB1	stable	24.2586
ENSG00000179262	3631.73	0.422821	0.0400376	10.5606	4.53768e-26	5.62894e-25	RAD23A	stable	24.2496
ENSG00000140264	4078.83	-0.45836	0.0434745	-10.5432	5.46197e-26	6.76412e-25	SERF2	stable	24.1698
ENSG00000197102	15492.4	0.360294	0.0341741	10.5429	5.47791e-26	6.77816e-25	DYNC1H1	stable	24.1689
ENSG00000108592	2006.81	0.485862	0.046146	10.5288	6.36292e-26	7.86664e-25	FTSJ3	stable	24.1042
ENSG00000161813	1856.56	0.490498	0.0466008	10.5255	6.58908e-26	8.13942e-25	LARP4	stable	24.0894
ENSG00000139645	3782.88	0.408623	0.0388246	10.5248	6.63729e-26	8.1921e-25	ANKRD52	stable	24.0866
ENSG00000170381	2207.04	-0.502277	0.0477418	-10.5207	6.93691e-26	8.5476e-25	SEMA3E	stable	24.0682
ENSG00000158290	1660.41	-0.516983	0.0491652	-10.5152	7.3505e-26	9.04965e-25	CUL4B	stable	24.0434
ENSG00000180957	2390.47	0.477723	0.0454375	10.5139	7.45728e-26	9.17344e-25	PITPNB	stable	24.0375
ENSG00000172534	6265.03	0.3946	0.0375548	10.5073	7.99596e-26	9.82789e-25	HCFC1	stable	24.0075
ENSG00000012048	1411.89	0.572977	0.0545319	10.5072	8.00412e-26	9.82973e-25	BRCA1	stable	24.0075
ENSG00000117411	3933.21	0.390006	0.0371263	10.5048	8.20793e-26	1.00632e-24	B4GALT2	stable	23.9973
ENSG00000122591	3615.69	0.420959	0.040075	10.5043	8.25579e-26	1.01135e-24	FAM126A	stable	23.9951
ENSG00000166886	3129	0.449889	0.042837	10.5023	8.42652e-26	1.03141e-24	NAB2	stable	23.9866
ENSG00000130935	1664.5	0.535172	0.0509904	10.4956	9.0547e-26	1.10646e-24	NOL11	stable	23.9561
ENSG00000196498	6414.42	0.431221	0.0410943	10.4935	9.25837e-26	1.13041e-24	NCOR2	stable	23.9468
ENSG00000146733	4626.75	0.390542	0.0372642	10.4803	1.06369e-25	1.29765e-24	PSPH	stable	23.8868
ENSG00000102038	2280.97	-0.468618	0.0448011	-10.46	1.31889e-25	1.60632e-24	SMARCA1	stable	23.7942
ENSG00000106460	2026.75	-0.500411	0.0478746	-10.4525	1.42679e-25	1.7363e-24	TMEM106B	stable	23.7604
ENSG00000185803	3200.12	0.460323	0.0440588	10.4479	1.49756e-25	1.81942e-24	SLC52A2	stable	23.7401
ENSG00000087191	3217.27	0.409682	0.0392131	10.4476	1.50298e-25	1.8245e-24	PSMC5	stable	23.7389
ENSG00000176624	1985.96	0.513431	0.0491488	10.4465	1.52079e-25	1.8446e-24	MEX3C	stable	23.7341
ENSG00000164713	2185.73	-0.521545	0.0499864	-10.4337	1.73923e-25	2.10608e-24	BRI3	stable	23.6765
ENSG00000063660	40706.9	0.348029	0.0334033	10.419	2.03084e-25	2.45718e-24	GPC1	stable	23.6096
ENSG00000130706	2705.75	0.483896	0.0464758	10.4118	2.19072e-25	2.64845e-24	ADRM1	stable	23.577
ENSG00000197930	2088.7	-0.503806	0.0484502	-10.3984	2.52078e-25	3.04248e-24	ERO1A	stable	23.5168
ENSG00000173674	3419.1	0.400232	0.038493	10.3976	2.54389e-25	3.06786e-24	EIF1AX	stable	23.5132
ENSG00000198467	3136.25	-0.40654	0.0391406	-10.3867	2.85176e-25	3.43072e-24	TPM2	stable	23.4646
ENSG00000137575	1594.19	-0.542854	0.0522719	-10.3852	2.89577e-25	3.48083e-24	SDCBP	stable	23.4583
ENSG00000099800	4386.66	0.440083	0.0424525	10.3665	3.52205e-25	4.21987e-24	TIMM13	stable	23.3747
ENSG00000116871	5847.9	0.410955	0.0396446	10.366	3.54194e-25	4.24025e-24	MAP7D1	stable	23.3726
ENSG00000145555	5334.39	-0.35057	0.0338275	-10.3635	3.63572e-25	4.34547e-24	MYO10	stable	23.362
ENSG00000176490	3575.74	-0.389884	0.0376277	-10.3616	3.70584e-25	4.42568e-24	DIRAS1	stable	23.354
ENSG00000065183	1595.24	0.515796	0.0497807	10.3614	3.7167e-25	4.43507e-24	WDR3	stable	23.3531
ENSG00000183207	3999.17	0.42221	0.0407543	10.3599	3.7744e-25	4.50027e-24	RUVBL2	stable	23.3468
ENSG00000100889	2013.28	0.498949	0.0482073	10.3501	4.18126e-25	4.9613e-24	PCK2	stable	23.3044
ENSG00000103449	3327.7	-0.398684	0.0385724	-10.336	4.84361e-25	5.74259e-24	SALL1	stable	23.2409
ENSG00000173457	8171.76	0.416245	0.0402766	10.3347	4.91172e-25	5.81865e-24	PPP1R14B	stable	23.2352
ENSG00000165821	1595.61	-0.558718	0.0540826	-10.3308	5.11099e-25	6.045e-24	SALL2	stable	23.2186
ENSG00000105137	2597.79	0.478782	0.0463762	10.3239	5.49659e-25	6.49065e-24	SYDE1	stable	23.1877
ENSG00000115091	4633.93	0.38074	0.0368874	10.3217	5.62291e-25	6.6345e-24	ACTR3	stable	23.1782
ENSG00000013810	2668.73	0.496445	0.0481015	10.3208	5.67571e-25	6.69144e-24	TACC3	stable	23.1745
ENSG00000128165	1265.13	0.582038	0.0565376	10.2947	7.4446e-25	8.74889e-24	ADM2	stable	23.058
ENSG00000138758	7936.26	0.344798	0.0335698	10.2711	9.51267e-25	1.11615e-23	2024-09-11	stable	22.9523
ENSG00000103018	2991.81	0.427281	0.0416381	10.2618	1.04764e-24	1.22629e-23	CYB5B	stable	22.9114
ENSG00000184445	2431.52	0.467072	0.0455312	10.2583	1.08603e-24	1.26921e-23	KNTC1	stable	22.8965
ENSG00000124766	2372.09	-0.482244	0.0470641	-10.2465	1.22668e-24	1.43133e-23	SOX4	stable	22.8443
ENSG00000197170	1970.31	0.469096	0.0458318	10.2352	1.37955e-24	1.60842e-23	PSMD12	stable	22.7936
ENSG00000087460	26611.6	-0.27989	0.0274042	-10.2134	1.72731e-24	2.0091e-23	GNAS	stable	22.697
ENSG00000119669	7399.78	0.366141	0.0358776	10.2053	1.87793e-24	2.18086e-23	IRF2BPL	stable	22.6614
ENSG00000142945	3697.01	0.383247	0.0375772	10.1989	2.00487e-24	2.32278e-23	KIF2C	stable	22.634
ENSG00000105559	2382.63	-0.45739	0.044849	-10.1984	2.01488e-24	2.33254e-23	PLEKHA4	stable	22.6322
ENSG00000187954	2838.63	-0.424426	0.0416398	-10.1928	2.13528e-24	2.46999e-23	CYHR1	stable	22.6073
ENSG00000123485	1852.88	0.482934	0.0473844	10.1918	2.15625e-24	2.49229e-23	HJURP	stable	22.6034
ENSG00000105438	5101.88	-0.377915	0.037084	-10.1908	2.17981e-24	2.51754e-23	KDELR1	stable	22.599
ENSG00000182446	3960.45	0.379615	0.0372541	10.1899	2.20033e-24	2.53925e-23	NPLOC4	stable	22.5953
ENSG00000170522	2049.61	0.470603	0.0462176	10.1823	2.37792e-24	2.73991e-23	ELOVL6	stable	22.5623
ENSG00000136270	4942.59	0.379258	0.0372515	10.181	2.41049e-24	2.77526e-23	TBRG4	stable	22.5567
ENSG00000145386	1396.91	0.573545	0.0563427	10.1796	2.44592e-24	2.81386e-23	CCNA2	stable	22.5507
ENSG00000068697	3782.03	-0.390608	0.038383	-10.1766	2.5224e-24	2.89732e-23	LAPTM4A	stable	22.538
ENSG00000099194	24637.7	0.290302	0.028533	10.1743	2.5834e-24	2.96277e-23	SCD	stable	22.5283
ENSG00000132563	1829.54	-0.512418	0.0503638	-10.1743	2.58142e-24	2.96277e-23	REEP2	stable	22.5283
ENSG00000162738	2266.63	-0.445703	0.0438116	-10.1732	2.61222e-24	2.99349e-23	VANGL2	stable	22.5238
ENSG00000136718	2071.2	0.465968	0.0458241	10.1686	2.73737e-24	3.13203e-23	IMP4	stable	22.5042
ENSG00000063601	1231.06	0.570807	0.0561424	10.1671	2.77975e-24	3.17805e-23	MTMR1	stable	22.4978
ENSG00000108298	27768.3	-0.321567	0.0316308	-10.1663	2.80404e-24	3.20335e-23	RPL19	stable	22.4944
ENSG00000189403	14173.6	0.273285	0.0268917	10.1624	2.91716e-24	3.32999e-23	HMGB1	stable	22.4776
ENSG00000119408	3403.91	0.467743	0.0460286	10.162	2.92981e-24	3.34184e-23	NEK6	stable	22.476
ENSG00000106624	7664.98	0.315576	0.0310756	10.1551	3.14568e-24	3.58529e-23	AEBP1	stable	22.4455
ENSG00000102007	2710.12	0.425407	0.0418925	10.1547	3.15738e-24	3.59585e-23	PLP2	stable	22.4442
ENSG00000106305	1824.73	0.499194	0.0491615	10.1542	3.17563e-24	3.61384e-23	AIMP2	stable	22.442
ENSG00000013275	4131.83	0.361946	0.0356564	10.1509	3.28157e-24	3.73152e-23	PSMC4	stable	22.4281
ENSG00000110492	9629.48	-0.366403	0.0361204	-10.1439	3.52565e-24	4.00597e-23	MDK	stable	22.3973
ENSG00000141458	2489.36	0.451714	0.0445435	10.141	3.63528e-24	4.121e-23	NPC1	stable	22.385
ENSG00000167693	1838.9	0.491181	0.0484465	10.1386	3.72317e-24	4.21416e-23	NXN	stable	22.3753
ENSG00000180900	9787.86	0.335836	0.0331265	10.138	3.74819e-24	4.23922e-23	SCRIB	stable	22.3727
ENSG00000111859	1876.9	0.492133	0.048549	10.1368	3.7921e-24	4.2856e-23	NEDD9	stable	22.368
ENSG00000075043	6135.22	-0.44376	0.0437783	-10.1365	3.80395e-24	4.2957e-23	KCNQ2	stable	22.367
ENSG00000198042	1669.28	0.526191	0.0519426	10.1302	4.05699e-24	4.57094e-23	MAK16	stable	22.34
ENSG00000101596	3700.23	0.426117	0.042112	10.1187	4.56588e-24	5.12723e-23	SMCHD1	stable	22.2901
ENSG00000149503	2426.34	0.483356	0.047769	10.1186	4.56813e-24	5.12723e-23	INCENP	stable	22.2901
ENSG00000181790	2581.67	-0.438424	0.04336	-10.1113	4.92515e-24	5.51954e-23	ADGRB1	stable	22.2581
ENSG00000160299	2302.03	0.439022	0.0434209	10.1108	4.94579e-24	5.53846e-23	PCNT	stable	22.2566
ENSG00000139116	3318.53	-0.410064	0.0405833	-10.1043	5.28943e-24	5.91878e-23	KIF21A	stable	22.2278
ENSG00000068903	1632.1	-0.510055	0.0504867	-10.1028	5.37108e-24	6.00559e-23	SIRT2	stable	22.2214
ENSG00000145934	3737.34	0.413921	0.0410197	10.0908	6.06752e-24	6.77401e-23	TENM2	stable	22.1692
ENSG00000131507	2687.09	-0.423664	0.042009	-10.0851	6.432e-24	7.17008e-23	NDFIP1	stable	22.1445
ENSG00000068489	1185.35	0.581049	0.057661	10.077	6.98425e-24	7.77393e-23	PRR11	stable	22.1094
ENSG00000127527	2225.67	0.462488	0.0459391	10.0674	7.69793e-24	8.56185e-23	EPS15L1	stable	22.0674
ENSG00000104687	4126.65	0.365704	0.0363445	10.0621	8.12136e-24	9.02597e-23	GSR	stable	22.0445
ENSG00000133243	5887.15	-0.354125	0.0352077	-10.0581	8.45749e-24	9.39247e-23	BTBD2	stable	22.0272
ENSG00000126217	2206.68	-0.441964	0.0439874	-10.0475	9.42083e-24	1.04387e-22	MCF2L	stable	21.9814
ENSG00000158941	6125.99	0.337208	0.0335708	10.0447	9.69488e-24	1.07343e-22	CCAR2	stable	21.9692
ENSG00000198700	4626.2	0.372629	0.0371085	10.0416	1.00029e-23	1.1067e-22	IPO9	stable	21.956
ENSG00000009335	4346.08	0.365426	0.0363969	10.04	1.01651e-23	1.1238e-22	UBE3C	stable	21.9493
ENSG00000136010	1657.61	0.523194	0.0521181	10.0386	1.03103e-23	1.139e-22	ALDH1L2	stable	21.9435
ENSG00000132535	1338.84	-0.550723	0.0548783	-10.0353	1.06588e-23	1.17574e-22	DLG4	stable	21.9297
ENSG00000116161	2543.75	0.429459	0.0428686	10.018	1.26997e-23	1.39773e-22	CACYBP	stable	21.8546
ENSG00000068654	4076.64	0.476124	0.0475331	10.0167	1.28775e-23	1.41624e-22	POLR1A	stable	21.8489
ENSG00000155380	3557.27	0.384626	0.038438	10.0064	1.42869e-23	1.56657e-22	SLC16A1	stable	21.8051
ENSG00000169499	3438.4	-0.420083	0.0421028	-9.97755	1.91133e-23	2.09112e-22	PLEKHA2	stable	21.6796
ENSG00000086061	6537.43	0.317878	0.0318709	9.97395	1.98194e-23	2.16675e-22	DNAJA1	stable	21.6642
ENSG00000157193	3041.8	0.419122	0.0420395	9.96972	2.06818e-23	2.25936e-22	LRP8	stable	21.646
ENSG00000011260	2244.59	0.457621	0.0459214	9.96531	2.16205e-23	2.36015e-22	UTP18	stable	21.6271
ENSG00000141030	2042.54	0.507165	0.0509519	9.95381	2.42719e-23	2.64763e-22	COPS3	stable	21.5771
ENSG00000143126	8660.82	-0.361696	0.036338	-9.95365	2.43093e-23	2.64975e-22	CELSR2	stable	21.5768
ENSG00000076382	2326.36	0.430538	0.0433205	9.93844	2.83234e-23	3.08046e-22	SPAG5	stable	21.5114
ENSG00000062485	6115.74	0.321237	0.0323279	9.93685	2.87793e-23	3.12773e-22	CS	stable	21.5048
ENSG00000170315	7398.48	-0.351484	0.035444	-9.9166	3.52571e-23	3.82328e-22	UBB	stable	21.4176
ENSG00000108344	5128.3	0.329856	0.0332835	9.9105	3.7477e-23	4.05803e-22	PSMD3	stable	21.3917
ENSG00000166483	2294.78	0.459928	0.0464114	9.9098	3.77387e-23	4.08337e-22	WEE1	stable	21.389
ENSG00000077152	1192.77	0.5701	0.0575408	9.90775	3.85227e-23	4.16514e-22	UBE2T	stable	21.3804
ENSG00000004142	3748.44	0.373998	0.0377551	9.90589	3.92448e-23	4.237e-22	POLDIP2	stable	21.3729
ENSG00000213719	9153.65	0.316123	0.0319177	9.90432	3.98681e-23	4.30114e-22	CLIC1	stable	21.3664
ENSG00000156030	1898.36	0.532497	0.0539596	9.86843	5.70488e-23	6.13671e-22	ELMSAN1	stable	21.2121
ENSG00000063177	19149.4	-0.325423	0.0330061	-9.85949	6.23665e-23	6.69895e-22	RPL18	stable	21.174
ENSG00000136888	2114.11	-0.442811	0.044951	-9.85097	6.78846e-23	7.26518e-22	ATP6V1G1	stable	21.1388
ENSG00000105063	3376.2	0.390997	0.0396954	9.84994	6.8587e-23	7.33503e-22	PPP6R1	stable	21.1346
ENSG00000196141	3132.89	0.3896	0.0395629	9.84762	7.01896e-23	7.49553e-22	SPATS2L	stable	21.1252
ENSG00000146223	2951.28	0.404803	0.0411189	9.84471	7.2249e-23	7.70987e-22	RPL7L1	stable	21.113
ENSG00000090863	5259.87	-0.332221	0.033751	-9.8433	7.32687e-23	7.80174e-22	GLG1	stable	21.1078
ENSG00000159335	17739.9	-0.373139	0.0379347	-9.83636	7.85026e-23	8.35301e-22	PTMS	stable	21.0782
ENSG00000130299	1259.67	0.55509	0.0564933	9.82577	8.72058e-23	9.27238e-22	GTPBP3	stable	21.0328
ENSG00000140534	1488.18	0.516236	0.0526089	9.81272	9.926e-23	1.05465e-21	TICRR	stable	20.9769
ENSG00000115875	4765.15	0.383545	0.0390881	9.81233	9.96424e-23	1.05795e-21	SRSF7	stable	20.9755
ENSG00000164434	15112.5	-0.341668	0.0348207	-9.81222	9.97527e-23	1.05836e-21	FABP7	stable	20.9754
ENSG00000185324	1689.59	0.542317	0.055307	9.80558	1.06535e-22	1.1295e-21	CDK10	stable	20.9471
ENSG00000145391	2000.77	0.471812	0.0481208	9.80474	1.07419e-22	1.13805e-21	SETD7	stable	20.9438
ENSG00000136450	2084.26	0.459518	0.0469047	9.79684	1.1616e-22	1.22978e-21	SRSF1	stable	20.9102
ENSG00000163527	4221.29	0.343814	0.0350951	9.79665	1.16382e-22	1.23125e-21	STT3B	stable	20.9097
ENSG00000147224	1776.6	0.470606	0.0480755	9.7889	1.25651e-22	1.3274e-21	PRPS1	stable	20.877
ENSG00000088448	2154.09	-0.445821	0.0455493	-9.78765	1.27221e-22	1.34302e-21	ANKRD10	stable	20.8719
ENSG00000131711	7794.58	0.366611	0.0374612	9.78644	1.28754e-22	1.35726e-21	MAP1B	stable	20.8673
ENSG00000006744	2243.96	0.445735	0.0455648	9.78243	1.33959e-22	1.41112e-21	ELAC2	stable	20.8504
ENSG00000198604	2250.95	0.482272	0.0493058	9.78126	1.3552e-22	1.42654e-21	BAZ1A	stable	20.8457
ENSG00000175567	3515.55	0.364837	0.037334	9.77225	1.48124e-22	1.55588e-21	UCP2	stable	20.808
ENSG00000004487	5037.68	0.32064	0.0328549	9.7593	1.68306e-22	1.76535e-21	KDM1A	stable	20.7532
ENSG00000134375	1861.34	0.467243	0.0479554	9.74328	1.97084e-22	2.0628e-21	TIMM17A	stable	20.6855
ENSG00000158604	5262.25	-0.322978	0.0331599	-9.74003	2.03491e-22	2.12835e-21	TMED4	stable	20.672
ENSG00000115825	2599.26	0.441788	0.0453787	9.73557	2.12623e-22	2.22072e-21	PRKD3	stable	20.6535
ENSG00000177542	2289.94	0.464531	0.0477601	9.72635	2.32808e-22	2.42981e-21	SLC25A22	stable	20.6144
ENSG00000115159	2006.26	0.460833	0.0473903	9.7242	2.37765e-22	2.47804e-21	GPD2	stable	20.6059
ENSG00000092820	2136.4	0.443178	0.0455922	9.72047	2.46637e-22	2.56869e-21	EZR	stable	20.5903
ENSG00000108559	1995.01	0.445718	0.045867	9.71761	2.53659e-22	2.63995e-21	NUP88	stable	20.5784
ENSG00000100418	1599.71	0.50021	0.0515299	9.70717	2.81033e-22	2.92278e-21	DESI1	stable	20.5342
ENSG00000130255	16610.3	-0.244774	0.0252295	-9.70189	2.95958e-22	3.07151e-21	RPL36	stable	20.5126
ENSG00000122026	5810.2	-0.324635	0.0335063	-9.68878	3.3654e-22	3.48531e-21	RPL21	stable	20.4578
ENSG00000185359	3451.36	0.427695	0.0441627	9.68453	3.50822e-22	3.63066e-21	HGS	stable	20.44
ENSG00000049759	1883.11	-0.513015	0.0529929	-9.68084	3.63715e-22	3.76145e-21	NEDD4L	stable	20.4246
ENSG00000123374	2299.49	0.46971	0.0486351	9.65784	4.55355e-22	4.68942e-21	CDK2	stable	20.3289
ENSG00000169230	2665.73	0.482992	0.0500318	9.65371	4.74107e-22	4.87913e-21	PRELID1	stable	20.3117
ENSG00000111269	1101.48	-0.570014	0.0590627	-9.65099	4.86814e-22	4.99943e-21	CREBL2	stable	20.3011
ENSG00000070423	3995.6	0.344246	0.0356722	9.65026	4.90306e-22	5.03178e-21	RNF126	stable	20.2983
ENSG00000104969	7320.02	0.360607	0.0373995	9.64201	5.31374e-22	5.44945e-21	SGTA	stable	20.2636
ENSG00000162736	4468.8	-0.33317	0.03459	-9.63198	5.85892e-22	6.00021e-21	NCSTN	stable	20.2218
ENSG00000105835	4508.15	-0.333004	0.0345758	-9.63112	5.90819e-22	6.04645e-21	NAMPT	stable	20.2185
ENSG00000182670	8281.37	-0.295564	0.0306891	-9.63092	5.91994e-22	6.05428e-21	TTC3	stable	20.2179
ENSG00000104131	2486.82	0.467727	0.0486062	9.62279	6.40687e-22	6.54317e-21	EIF3J	stable	20.1842
ENSG00000009954	7338.8	0.313164	0.0325569	9.61896	6.65022e-22	6.787e-21	BAZ1B	stable	20.1683
ENSG00000123064	3027.12	0.389636	0.0405096	9.61836	6.68886e-22	6.82171e-21	DDX54	stable	20.1661
ENSG00000126456	2297.13	0.432095	0.04495	9.61279	7.06126e-22	7.19653e-21	IRF3	stable	20.1429
ENSG00000173692	2758.15	0.399484	0.0416101	9.60064	7.94501e-22	8.07487e-21	PSMD1	stable	20.0929
ENSG00000082212	2377.34	0.415239	0.0432935	9.59125	8.70228e-22	8.83234e-21	ME2	stable	20.0539
ENSG00000178104	2014.94	-0.440876	0.0459888	-9.58659	9.10466e-22	9.23437e-21	PDE4DIP	stable	20.0346
ENSG00000005022	6592.27	0.338667	0.0353947	9.56829	1.08683e-21	1.10005e-20	SLC25A5	stable	19.9586
ENSG00000116857	2653.74	-0.424297	0.0443783	-9.56092	1.16717e-21	1.17974e-20	TMEM9	stable	19.9282
ENSG00000127463	3736.92	0.357102	0.0373717	9.55541	1.23097e-21	1.24252e-20	EMC1	stable	19.9057
ENSG00000086015	2470.78	0.429375	0.0449528	9.55168	1.27605e-21	1.28714e-20	MAST2	stable	19.8904
ENSG00000124067	1984.98	0.466223	0.0488776	9.53859	1.44782e-21	1.45941e-20	SLC12A4	stable	19.8358
ENSG00000133142	1154.14	-0.560583	0.0587816	-9.53671	1.47442e-21	1.48419e-20	TCEAL4	stable	19.8285
ENSG00000182934	5087.63	0.314945	0.0330405	9.53208	1.54158e-21	1.55074e-20	SRPRA	stable	19.8095
ENSG00000007376	1829.41	0.467958	0.0491311	9.52467	1.65569e-21	1.66325e-20	RPUSD1	stable	19.779
ENSG00000115966	1235.55	-0.531953	0.0558659	-9.52195	1.69954e-21	1.70498e-20	ATF2	stable	19.7683
ENSG00000104341	5136.07	0.311991	0.0327827	9.51694	1.78355e-21	1.78682e-20	LAPTM4B	stable	19.7479
ENSG00000087245	4420.89	0.357993	0.0376559	9.50694	1.96351e-21	1.96578e-20	MMP2	stable	19.7065
ENSG00000182809	4351.55	-0.378434	0.0398631	-9.49333	2.23759e-21	2.23865e-20	CRIP2	stable	19.65
ENSG00000137497	5322	-0.317984	0.0335118	-9.48873	2.33867e-21	2.33819e-20	NUMA1	stable	19.6311
ENSG00000176087	2535.63	0.410078	0.0432281	9.48639	2.39164e-21	2.38792e-20	SLC35A4	stable	19.622
ENSG00000177595	1682.31	0.491387	0.051799	9.48642	2.39106e-21	2.38792e-20	PIDD1	stable	19.622
ENSG00000173145	1077.95	0.568948	0.0600386	9.47636	2.6331e-21	2.62367e-20	NOC3L	stable	19.5811
ENSG00000058262	9307.78	0.269821	0.0284789	9.4744	2.68309e-21	2.67167e-20	SEC61A1	stable	19.5732
ENSG00000109084	3976.78	0.353371	0.0373006	9.47363	2.70295e-21	2.68781e-20	TMEM97	stable	19.5706
ENSG00000049656	2642.48	0.39454	0.0416549	9.47162	2.75533e-21	2.73621e-20	CLPTM1L	stable	19.5629
ENSG00000165323	6149.27	-0.378829	0.040004	-9.46978	2.80431e-21	2.78297e-20	FAT3	stable	19.5555
ENSG00000188157	14857.7	-0.305533	0.0322672	-9.46885	2.82952e-21	2.8061e-20	AGRN	stable	19.5519
ENSG00000064042	1414.4	0.525737	0.0556086	9.45426	3.2533e-21	3.21555e-20	LIMCH1	stable	19.4927
ENSG00000135390	4412.1	-0.438544	0.0463918	-9.45305	3.29093e-21	3.25056e-20	ATP5MC2	stable	19.488
ENSG00000178719	7688.67	-0.308203	0.0326046	-9.45275	3.30043e-21	3.25776e-20	GRINA	stable	19.4871
ENSG00000172037	3474.92	-0.362421	0.0383421	-9.45229	3.3149e-21	3.26986e-20	LAMB2	stable	19.4855
ENSG00000066322	2551.35	0.426207	0.0451854	9.43241	4.00764e-21	3.9479e-20	ELOVL1	stable	19.4036
ENSG00000185347	1964.87	0.56675	0.060207	9.41335	4.80567e-21	4.71512e-20	TEDC1	stable	19.3265
ENSG00000164880	9826.84	0.282247	0.029996	9.40948	4.98602e-21	4.88882e-20	INTS1	stable	19.3108
ENSG00000110958	6898.09	0.292576	0.0311183	9.40203	5.35225e-21	5.24442e-20	PTGES3	stable	19.2803
ENSG00000166582	2407.95	0.448602	0.0477678	9.39132	5.9253e-21	5.79822e-20	CENPV	stable	19.2367
ENSG00000136875	1555.13	0.493658	0.0525833	9.38812	6.10801e-21	5.96908e-20	PRPF4	stable	19.2241
ENSG00000161036	2531.87	0.427771	0.0455688	9.38737	6.15192e-21	6.00801e-20	LRWD1	stable	19.2213
ENSG00000183579	1621.36	0.48039	0.0511823	9.38587	6.23965e-21	6.08965e-20	ZNRF3	stable	19.2154
ENSG00000099821	6394.57	0.310013	0.0330339	9.38469	6.31009e-21	6.15432e-20	POLRMT	stable	19.2108
ENSG00000145833	2386.68	0.447092	0.0476546	9.38194	6.47695e-21	6.31288e-20	DDX46	stable	19.1998
ENSG00000133026	5162.5	0.341911	0.0364534	9.3794	6.63511e-21	6.46277e-20	MYH10	stable	19.1896
ENSG00000082014	2667.87	-0.42229	0.0450463	-9.37458	6.94538e-21	6.7605e-20	SMARCD3	stable	19.17
ENSG00000213585	4017	0.35162	0.0375101	9.37401	6.98305e-21	6.79269e-20	VDAC1	stable	19.168
ENSG00000174442	1247.12	0.561188	0.0599247	9.36489	7.61329e-21	7.40087e-20	ZWILCH	stable	19.1307
ENSG00000173230	1689.33	-0.49143	0.052516	-9.35772	8.14742e-21	7.91487e-20	GOLGB1	stable	19.1016
ENSG00000126215	1581.96	0.495675	0.0529722	9.35726	8.18345e-21	7.94463e-20	XRCC3	stable	19.0999
ENSG00000082153	5747.69	0.331392	0.0354344	9.35227	8.57858e-21	8.32274e-20	BZW1	stable	19.0797
ENSG00000014216	2185.15	-0.453475	0.0485246	-9.34527	9.16546e-21	8.8746e-20	CAPN1	stable	19.0519
ENSG00000107223	6283.29	-0.298064	0.0319178	-9.33851	9.76969e-21	9.45344e-20	EDF1	stable	19.0244
ENSG00000149554	1670.33	0.470216	0.0503598	9.33713	9.89792e-21	9.57124e-20	CHEK1	stable	19.019
ENSG00000007047	1151.46	-0.535892	0.0574219	-9.33254	1.03365e-20	9.98881e-20	MARK4	stable	19.0005
ENSG00000128708	2309.12	0.427869	0.0458503	9.33187	1.04023e-20	1.00458e-19	HAT1	stable	18.998
ENSG00000143368	2622.05	0.381697	0.0409175	9.32846	1.07423e-20	1.03673e-19	SF3B4	stable	18.9843
ENSG00000103742	1153.01	-0.530579	0.0568819	-9.32771	1.08178e-20	1.04334e-19	IGDCC4	stable	18.9816
ENSG00000106484	4298.46	0.356301	0.0382651	9.31137	1.26196e-20	1.21473e-19	MEST	stable	18.9155
ENSG00000131016	3008.84	0.379601	0.0407774	9.30909	1.28935e-20	1.24028e-19	AKAP12	stable	18.9065
ENSG00000186432	2039.17	0.490112	0.0526994	9.30016	1.40241e-20	1.34553e-19	KPNA4	stable	18.8711
ENSG00000106400	2503.34	-0.439934	0.0473269	-9.29563	1.46331e-20	1.40214e-19	ZNHIT1	stable	18.8532
ENSG00000148841	1689.34	0.473689	0.0509641	9.29456	1.47823e-20	1.41459e-19	ITPRIP	stable	18.8494
ENSG00000172057	1812.99	-0.463978	0.0499276	-9.29301	1.49989e-20	1.43439e-19	ORMDL3	stable	18.8433
ENSG00000117500	2208.03	0.435538	0.046868	9.29287	1.50183e-20	1.43531e-19	TMED5	stable	18.8431
ENSG00000136813	2166.16	0.445105	0.0479331	9.28595	1.60264e-20	1.53067e-19	ECPAS	stable	18.8151
ENSG00000182963	1226.61	0.523468	0.0564303	9.27636	1.75368e-20	1.67275e-19	GJC1	stable	18.7766
ENSG00000148396	5261.15	0.375157	0.0404555	9.27333	1.80426e-20	1.717e-19	SEC16A	stable	18.7652
ENSG00000185163	1226.22	0.529533	0.0571427	9.26687	1.91696e-20	1.82143e-19	DDX51	stable	18.7396
ENSG00000065427	3337.99	0.355023	0.0383209	9.26449	1.96007e-20	1.85999e-19	KARS	stable	18.7305
ENSG00000072958	3328.57	0.382075	0.0413167	9.24748	2.29853e-20	2.17416e-19	AP1M1	stable	18.6627
ENSG00000205937	5816	0.331679	0.035907	9.23718	2.53084e-20	2.39237e-19	RNPS1	stable	18.6212
ENSG00000105605	3130.95	-0.446975	0.048423	-9.23063	2.69036e-20	2.53828e-19	CACNG7	stable	18.5955
ENSG00000205339	9820.94	0.311503	0.0337501	9.2297	2.714e-20	2.55894e-19	IPO7	stable	18.5919
ENSG00000115944	1105.55	-0.572365	0.0620284	-9.22748	2.77084e-20	2.61086e-19	COX7A2L	stable	18.5832
ENSG00000109089	1928.12	0.524057	0.0568289	9.22166	2.92541e-20	2.75299e-19	CDR2L	stable	18.5602
ENSG00000148303	31007.2	-0.289378	0.0313811	-9.22139	2.93265e-20	2.75804e-19	RPL7A	stable	18.5594
ENSG00000103326	1672.91	0.457878	0.0496572	9.22078	2.94948e-20	2.7721e-19	CAPN15	stable	18.5572
ENSG00000135372	2208.52	0.426762	0.0462886	9.2196	2.98199e-20	2.80087e-19	NAT10	stable	18.5527
ENSG00000069011	1966.16	0.44936	0.048808	9.20669	3.36335e-20	3.15504e-19	PITX1	stable	18.501
ENSG00000091542	3986.45	-0.345331	0.0375135	-9.20549	3.40101e-20	3.18834e-19	ALKBH5	stable	18.4964
ENSG00000143870	9794.21	0.259336	0.0281803	9.20273	3.48976e-20	3.26946e-19	PDIA6	stable	18.4855
ENSG00000134291	1896.06	0.439058	0.0477784	9.18947	3.94793e-20	3.69401e-19	TMEM106C	stable	18.4325
ENSG00000121653	2699.72	-0.410658	0.0447476	-9.1772	4.42432e-20	4.13189e-19	MAPK8IP1	stable	18.3839
ENSG00000054965	5806.28	-0.31862	0.0347294	-9.17436	4.54262e-20	4.237e-19	FAM168A	stable	18.3729
ENSG00000131435	5253.69	0.376634	0.0410528	9.17437	4.54226e-20	4.237e-19	PDLIM4	stable	18.3729
ENSG00000101290	2797.42	-0.367316	0.0400753	-9.16565	4.92498e-20	4.58783e-19	CDS2	stable	18.3384
ENSG00000073060	3794.87	0.333836	0.036427	9.16452	4.97669e-20	4.63307e-19	SCARB1	stable	18.3341
ENSG00000167962	1949.74	0.434476	0.0474175	9.16279	5.05706e-20	4.70492e-19	ZNF598	stable	18.3274
ENSG00000136238	15150.5	0.237612	0.0259399	9.16011	5.18423e-20	4.82019e-19	RAC1	stable	18.3169
ENSG00000137700	1107.78	0.538563	0.0588524	9.15108	5.63687e-20	5.23444e-19	SLC37A4	stable	18.2811
ENSG00000164096	1554.14	-0.490911	0.0536599	-9.14855	5.77044e-20	5.3551e-19	C4orf3	stable	18.2712
ENSG00000273749	4779.75	0.345871	0.0378122	9.14708	5.8495e-20	5.42505e-19	CYFIP1	stable	18.2656
ENSG00000139726	2564.32	0.382479	0.0418262	9.14448	5.99173e-20	5.55346e-19	DENR	stable	18.2554
ENSG00000148082	2324.33	-0.440964	0.0482335	-9.14229	6.11419e-20	5.66341e-19	SHC3	stable	18.2469
ENSG00000168894	1469.85	-0.530007	0.0579802	-9.14118	6.17762e-20	5.71857e-19	RNF181	stable	18.2427
ENSG00000130725	3996.79	0.377242	0.0412778	9.1391	6.29767e-20	5.82603e-19	UBE2M	stable	18.2346
ENSG00000169718	2870.49	0.419977	0.0460028	9.12938	6.88901e-20	6.36111e-19	DUS1L	stable	18.1965
ENSG00000133422	1881.33	0.432443	0.0474198	9.11944	7.55119e-20	6.96818e-19	MORC2	stable	18.1569
ENSG00000128626	1689.01	0.463303	0.0508065	9.11897	7.58429e-20	6.99435e-19	MRPS12	stable	18.1553
ENSG00000182307	4007.16	0.331889	0.0364258	9.11139	8.1334e-20	7.49605e-19	C8orf33	stable	18.1252
ENSG00000143319	1601.14	0.499683	0.0548425	9.11125	8.14389e-20	7.50103e-19	ISG20L2	stable	18.1249
ENSG00000070882	2862.11	0.394111	0.0432618	9.10991	8.24498e-20	7.5894e-19	OSBPL3	stable	18.1198
ENSG00000172809	5408.97	-0.410433	0.0450541	-9.10978	8.25464e-20	7.59354e-19	RPL38	stable	18.1196
ENSG00000185088	951.83	-0.566809	0.0622869	-9.09996	9.03666e-20	8.30257e-19	RPS27L	stable	18.0808
ENSG00000132780	5690.67	0.307551	0.0338138	9.09543	9.42111e-20	8.64592e-19	NASP	stable	18.0632
ENSG00000148248	7300.48	0.296205	0.0325832	9.09073	9.83794e-20	9.01068e-19	SURF4	stable	18.0452
ENSG00000104408	2400.82	-0.414981	0.0456866	-9.08322	1.05407e-19	9.63639e-19	EIF3E	stable	18.0161
ENSG00000100592	1194.13	-0.538081	0.0592704	-9.07841	1.10176e-19	1.00661e-18	DAAM1	stable	17.9971
ENSG00000112242	1170.2	0.521686	0.0574652	9.07829	1.1029e-19	1.00703e-18	E2F3	stable	17.997
ENSG00000102178	1592.24	0.468259	0.0516054	9.07384	1.14898e-19	1.04845e-18	UBL4A	stable	17.9795
ENSG00000176871	2713.66	0.387396	0.0427034	9.07178	1.17083e-19	1.06707e-18	WSB2	stable	17.9718
ENSG00000125450	2010.88	0.43015	0.0474482	9.06569	1.23823e-19	1.12641e-18	NUP85	stable	17.9483
ENSG00000173207	1885.02	0.457586	0.0505011	9.06092	1.29358e-19	1.17603e-18	CKS1B	stable	17.9296
ENSG00000060688	1992.98	0.413714	0.0456969	9.05345	1.38517e-19	1.25775e-18	SNRNP40	stable	17.9004
ENSG00000149823	3574.03	-0.398865	0.0440604	-9.0527	1.39474e-19	1.26566e-18	VPS51	stable	17.8977
ENSG00000165943	993.507	-0.548181	0.0605975	-9.04627	1.47941e-19	1.34167e-18	MOAP1	stable	17.8724
ENSG00000173821	2388.75	-0.397849	0.0439992	-9.04219	1.53564e-19	1.3918e-18	RNF213	stable	17.8564
ENSG00000167508	3314.25	0.381618	0.0422192	9.03898	1.5814e-19	1.43151e-18	MVD	stable	17.8442
ENSG00000089597	19003.2	0.240846	0.0266699	9.03062	1.70709e-19	1.54435e-18	GANAB	stable	17.8113
ENSG00000151465	1497.28	0.476155	0.0527371	9.02884	1.73496e-19	1.5686e-18	CDC123	stable	17.8045
ENSG00000013441	1042.37	-0.541871	0.0600206	-9.02808	1.74717e-19	1.57769e-18	CLK1	stable	17.802
ENSG00000138835	2409.89	-0.422557	0.0468339	-9.02246	1.83908e-19	1.65968e-18	RGS3	stable	17.78
ENSG00000112893	1441.27	0.49032	0.0543689	9.0184	1.90859e-19	1.7203e-18	MAN2A1	stable	17.7644
ENSG00000160209	2978.23	0.38981	0.0432262	9.01791	1.91707e-19	1.72689e-18	PDXK	stable	17.7627
ENSG00000148429	1494.48	0.490414	0.0544258	9.01068	2.04778e-19	1.84237e-18	USP6NL	stable	17.7346
ENSG00000129353	3673.73	-0.334808	0.0371832	-9.00428	2.17082e-19	1.95188e-18	SLC44A2	stable	17.7095
ENSG00000163714	3754.54	0.390192	0.043335	9.00408	2.17474e-19	1.95422e-18	U2SURP	stable	17.709
ENSG00000168488	5006.85	0.306633	0.0340587	9.00307	2.195e-19	1.97122e-18	ATXN2L	stable	17.7053
ENSG00000112081	7844.31	0.262762	0.0292129	8.99474	2.36796e-19	2.12138e-18	SRSF3	stable	17.6734
ENSG00000196367	6827.89	0.339241	0.0377444	8.98787	2.5207e-19	2.25684e-18	TRRAP	stable	17.6465
ENSG00000090020	1334.6	0.499533	0.0556229	8.9807	2.69056e-19	2.40599e-18	SLC9A1	stable	17.6187
ENSG00000143179	1719.82	0.443705	0.0494115	8.9798	2.71259e-19	2.42422e-18	UCK2	stable	17.6154
ENSG00000130520	7365.39	0.303577	0.0338359	8.97206	2.91008e-19	2.59914e-18	LSM4	stable	17.5852
ENSG00000151929	1225.15	0.525454	0.0586777	8.95491	3.40012e-19	3.03499e-18	BAG3	stable	17.5178
ENSG00000178585	1459.66	-0.47445	0.0530158	-8.94923	3.57975e-19	3.19339e-18	CTNNBIP1	stable	17.4957
ENSG00000117399	2738.02	0.397856	0.0444677	8.94707	3.65028e-19	3.25237e-18	CDC20	stable	17.4878
ENSG00000124177	1246.78	-0.516911	0.0577739	-8.94713	3.64833e-19	3.25237e-18	CHD6	stable	17.4878
ENSG00000205683	1212.71	-0.522196	0.058382	-8.94447	3.73751e-19	3.32808e-18	DPF3	stable	17.4778
ENSG00000057935	973.407	-0.569716	0.0637065	-8.94282	3.79359e-19	3.37598e-18	MTA3	stable	17.4716
ENSG00000156273	2080.05	-0.490634	0.0549272	-8.93243	4.16748e-19	3.70646e-18	BACH1	stable	17.431
ENSG00000165661	1958.95	0.4216	0.0472041	8.93142	4.2056e-19	3.73812e-18	QSOX2	stable	17.4273
ENSG00000104823	1588.1	-0.482572	0.0540904	-8.92158	4.59677e-19	4.07597e-18	ECH1	stable	17.3898
ENSG00000105640	31974.7	-0.277164	0.0310944	-8.91361	4.93974e-19	4.37745e-18	RPL18A	stable	17.3588
ENSG00000133030	6029.16	0.342088	0.0383817	8.91278	4.97699e-19	4.4078e-18	MPRIP	stable	17.3558
ENSG00000117724	6425.68	0.365994	0.0410793	8.90943	5.12937e-19	4.54003e-18	CENPF	stable	17.3429
ENSG00000111669	36811.4	-0.234116	0.0262807	-8.90826	5.18418e-19	4.58579e-18	TPI1	stable	17.3386
ENSG00000277972	1022.08	0.566676	0.0636403	8.90436	5.36927e-19	4.74667e-18	CISD3	stable	17.3236
ENSG00000162434	2422.59	-0.373344	0.0419597	-8.89768	5.70247e-19	5.0382e-18	JAK1	stable	17.2977
ENSG00000149115	3270.43	0.348766	0.0392275	8.89085	6.06417e-19	5.35136e-18	TNKS1BP1	stable	17.2715
ENSG00000158195	4324.37	-0.333306	0.0375236	-8.88258	6.53244e-19	5.75769e-18	WASF2	stable	17.2398
ENSG00000108021	1715.44	0.460609	0.0518571	8.88228	6.55064e-19	5.77028e-18	FAM208B	stable	17.2388
ENSG00000197635	1010.52	-0.546347	0.0615135	-8.88174	6.58205e-19	5.79449e-18	DPP4	stable	17.237
ENSG00000198763	47042.6	0.257686	0.0291007	8.85495	8.37241e-19	7.3443e-18	MT-ND2	stable	17.134
ENSG00000047644	2249.63	0.421584	0.0476857	8.8409	9.49471e-19	8.32382e-18	WWC3	stable	17.0797
ENSG00000099331	7826.3	0.274229	0.0310517	8.83135	1.03416e-18	9.05547e-18	MYO9B	stable	17.0431
ENSG00000068745	1913.96	-0.433104	0.0490963	-8.82152	1.1292e-18	9.876e-18	IP6K2	stable	17.0054
ENSG00000153885	2300.49	0.408584	0.0463518	8.81484	1.19856e-18	1.04763e-17	KCTD15	stable	16.9798
ENSG00000087266	1414.24	-0.47914	0.0543783	-8.81125	1.23763e-18	1.0805e-17	SH3BP2	stable	16.9664
ENSG00000184787	3025.37	0.358704	0.0407262	8.80769	1.27754e-18	1.11469e-17	UBE2G2	stable	16.9528
ENSG00000163918	1010.62	0.548787	0.0623219	8.80568	1.30057e-18	1.13412e-17	RFC4	stable	16.9453
ENSG00000161203	7152.78	0.281436	0.0319613	8.80552	1.30252e-18	1.13514e-17	AP2M1	stable	16.9449
ENSG00000165494	1634.6	-0.461575	0.0524486	-8.80053	1.36177e-18	1.18607e-17	PCF11	stable	16.9259
ENSG00000102900	1962.94	0.424293	0.0482326	8.79681	1.40759e-18	1.22454e-17	NUP93	stable	16.912
ENSG00000130024	1789.88	0.431426	0.0490784	8.79056	1.48819e-18	1.29313e-17	PHF10	stable	16.8884
ENSG00000068878	2121.97	0.412494	0.0469707	8.78195	1.60669e-18	1.39527e-17	PSME4	stable	16.8553
ENSG00000175215	6404.01	-0.285794	0.0325708	-8.77454	1.71606e-18	1.48937e-17	CTDSP2	stable	16.827
ENSG00000101412	1702.53	0.451734	0.0514924	8.77284	1.74222e-18	1.51119e-17	E2F1	stable	16.8207
ENSG00000152291	4321.23	0.308709	0.0352035	8.76927	1.79834e-18	1.55895e-17	TGOLN2	stable	16.8072
ENSG00000140391	7262.14	-0.295033	0.0336519	-8.7672	1.83159e-18	1.58684e-17	TSPAN3	stable	16.7995
ENSG00000138031	1377.83	0.529952	0.0605323	8.75485	2.04373e-18	1.76752e-17	ADCY3	stable	16.7526
ENSG00000134419	1696.61	-0.428275	0.0489199	-8.7546	2.0482e-18	1.77034e-17	RPS15A	stable	16.7519
ENSG00000114268	1015.44	-0.584723	0.0668392	-8.74821	2.16767e-18	1.87251e-17	PFKFB4	stable	16.7276
ENSG00000112249	1474.86	0.476908	0.0545203	8.74734	2.18446e-18	1.8848e-17	ASCC3	stable	16.7247
ENSG00000126067	3548.87	0.348499	0.0398664	8.74166	2.29702e-18	1.9796e-17	PSMB2	stable	16.7034
ENSG00000011485	3260.8	0.37073	0.0424093	8.74171	2.29604e-18	1.9796e-17	PPP5C	stable	16.7034
ENSG00000227057	1479.26	0.45666	0.0522933	8.73265	2.48765e-18	2.14014e-17	WDR46	stable	16.6696
ENSG00000106003	1603.38	-0.489618	0.0561187	-8.7247	2.66888e-18	2.29337e-17	LFNG	stable	16.6395
ENSG00000114942	6485.63	0.275882	0.0316231	8.72406	2.68404e-18	2.30506e-17	EEF1B2	stable	16.6373
ENSG00000066629	1206.68	0.496487	0.0569269	8.72148	2.74587e-18	2.35541e-17	EML1	stable	16.6279
ENSG00000103275	2323.25	0.433812	0.0497733	8.71576	2.88823e-18	2.47608e-17	UBE2I	stable	16.6062
ENSG00000147955	3143.68	0.360826	0.0414051	8.71453	2.91962e-18	2.50154e-17	SIGMAR1	stable	16.6018
ENSG00000086289	2158.05	0.389178	0.0446632	8.7136	2.94361e-18	2.52063e-17	EPDR1	stable	16.5985
ENSG00000112787	2944.68	0.420768	0.0483294	8.70625	3.14083e-18	2.68639e-17	FBRSL1	stable	16.5708
ENSG00000183098	950.405	0.580977	0.0668422	8.69177	3.56824e-18	3.05019e-17	GPC6	stable	16.5157
ENSG00000134308	12616.8	0.226981	0.0261268	8.68767	3.69941e-18	3.15864e-17	YWHAQ	stable	16.5005
ENSG00000148229	2207.12	0.387494	0.0446027	8.68768	3.69901e-18	3.15864e-17	POLE3	stable	16.5005
ENSG00000104967	1087.35	-0.537508	0.061873	-8.68727	3.71238e-18	3.16788e-17	NOVA2	stable	16.4992
ENSG00000174231	12994.4	0.314007	0.0361709	8.68119	3.91639e-18	3.33425e-17	PRPF8	stable	16.477
ENSG00000101782	1955.59	-0.400596	0.0461662	-8.67726	4.05419e-18	3.44957e-17	RIOK3	stable	16.4622
ENSG00000008256	1373.52	0.4741	0.0546403	8.67675	4.07256e-18	3.4632e-17	CYTH3	stable	16.4605
ENSG00000179403	2578.85	-0.467347	0.0538707	-8.67535	4.12267e-18	3.50379e-17	VWA1	stable	16.4555
ENSG00000196313	3027.93	0.394849	0.0455188	8.67442	4.15654e-18	3.53054e-17	POM121	stable	16.4522
ENSG00000061273	1598.69	0.445825	0.051422	8.66992	4.3241e-18	3.67075e-17	HDAC7	stable	16.4352
ENSG00000134333	27824.6	-0.220376	0.0254188	-8.66981	4.32845e-18	3.67233e-17	LDHA	stable	16.4351
ENSG00000136824	1608.59	0.459381	0.0530022	8.6672	4.42865e-18	3.75087e-17	SMC2	stable	16.4259
ENSG00000028310	1461.78	0.479231	0.0552941	8.66694	4.43871e-18	3.75723e-17	BRD9	stable	16.4251
ENSG00000204628	27643.8	-0.229536	0.0264869	-8.66602	4.47486e-18	3.78348e-17	RACK1	stable	16.4221
ENSG00000213722	2069.26	-0.450602	0.0520061	-8.66442	4.53811e-18	3.83476e-17	DDAH2	stable	16.4163
ENSG00000128595	10569.9	0.27207	0.0314076	8.66255	4.61344e-18	3.89618e-17	CALU	stable	16.4094
ENSG00000091483	1565.67	0.436646	0.0504306	8.65835	4.78634e-18	4.03988e-17	FH	stable	16.3936
ENSG00000106028	2132.8	0.400372	0.0462462	8.65741	4.82595e-18	4.07098e-17	SSBP1	stable	16.3903
ENSG00000147889	24477.2	0.320827	0.0370793	8.65247	5.03969e-18	4.24885e-17	CDKN2A	stable	16.3717
ENSG00000100304	2918.36	0.375226	0.0433817	8.64941	5.17686e-18	4.362e-17	TTLL12	stable	16.3603
ENSG00000198794	856.409	-0.569103	0.0657997	-8.64902	5.19436e-18	4.37424e-17	SCAMP5	stable	16.3591
ENSG00000183431	3449.74	0.322451	0.0372865	8.64792	5.24444e-18	4.41389e-17	SF3A3	stable	16.3552
ENSG00000198826	1567.46	0.454772	0.052664	8.63535	5.85483e-18	4.92199e-17	ARHGAP11A	stable	16.3079
ENSG00000183762	973.415	-0.547056	0.0634697	-8.61917	6.74389e-18	5.65972e-17	KREMEN1	stable	16.2472
ENSG00000272391	3902.7	0.343052	0.0398176	8.61558	6.95906e-18	5.83365e-17	POM121C	stable	16.2341
ENSG00000135439	14940.9	-0.247156	0.0287201	-8.60566	7.58781e-18	6.34989e-17	AGAP2	stable	16.1972
ENSG00000177283	4560.53	-0.351697	0.0408687	-8.60554	7.59591e-18	6.35306e-17	FZD8	stable	16.197
ENSG00000160058	1524.14	-0.459775	0.0535274	-8.58953	8.73255e-18	7.29958e-17	BSDC1	stable	16.1367
ENSG00000113407	3482.04	0.338205	0.0393958	8.5848	9.09967e-18	7.59353e-17	TARS	stable	16.1196
ENSG00000160075	4675.29	0.323653	0.0377091	8.58289	9.25148e-18	7.71149e-17	SSU72	stable	16.1129
ENSG00000198355	3072.54	-0.339656	0.0395853	-8.58036	9.45777e-18	7.87898e-17	PIM3	stable	16.1035
ENSG00000069275	14557.5	0.24668	0.0287858	8.56951	1.03926e-17	8.65284e-17	NUCKS1	stable	16.0628
ENSG00000132432	5310.16	-0.333758	0.0389491	-8.56908	1.04314e-17	8.68031e-17	SEC61G	stable	16.0615
ENSG00000085377	922.681	0.565153	0.0659803	8.56548	1.07625e-17	8.94566e-17	PREP	stable	16.0484
ENSG00000164109	1665.9	0.462502	0.0539982	8.56513	1.07956e-17	8.96812e-17	MAD2L1	stable	16.0473
ENSG00000140157	1929.11	0.419545	0.0489841	8.56494	1.08136e-17	8.978e-17	NIPA2	stable	16.0468
ENSG00000145907	4044.53	0.330984	0.0387	8.55256	1.20389e-17	9.97847e-17	G3BP1	stable	16.0009
ENSG00000108010	1353.79	0.49892	0.0583924	8.54426	1.29364e-17	1.07043e-16	GLRX3	stable	15.9704
ENSG00000101444	4872.26	0.300619	0.0351878	8.54328	1.3047e-17	1.07898e-16	AHCY	stable	15.967
ENSG00000133619	1292.31	-0.494093	0.0579617	-8.52447	1.53515e-17	1.26672e-16	KRBA1	stable	15.8973
ENSG00000105193	21362.7	-0.274578	0.0322212	-8.52165	1.57294e-17	1.29717e-16	RPS16	stable	15.887
ENSG00000136261	3073.66	0.349942	0.0410694	8.52076	1.58507e-17	1.30644e-16	BZW2	stable	15.8839
ENSG00000079819	4076.84	0.327681	0.0384599	8.52006	1.59467e-17	1.31362e-16	EPB41L2	stable	15.8815
ENSG00000271601	2320.03	-0.389019	0.0456671	-8.51858	1.61518e-17	1.32977e-16	LIX1L	stable	15.8762
ENSG00000143384	9363.5	0.261039	0.0306524	8.51613	1.64978e-17	1.35674e-16	MCL1	stable	15.8675
ENSG00000166123	2894.46	0.349671	0.0410681	8.51442	1.67422e-17	1.37607e-16	GPT2	stable	15.8614
ENSG00000113460	837.538	0.562938	0.0661743	8.50689	1.78658e-17	1.4676e-16	BRIX1	stable	15.8334
ENSG00000106348	3314.03	0.354884	0.0417321	8.50386	1.83385e-17	1.5056e-16	IMPDH1	stable	15.8223
ENSG00000175467	3090.86	0.346023	0.040691	8.50366	1.83704e-17	1.50687e-16	SART1	stable	15.8219
ENSG00000085840	1066.26	0.532485	0.0626185	8.50363	1.83745e-17	1.50687e-16	ORC1	stable	15.8219
ENSG00000165861	900.262	-0.581143	0.0683672	-8.50032	1.89068e-17	1.54967e-16	ZFYVE1	stable	15.8098
ENSG00000082516	1044.24	0.515901	0.060751	8.49206	2.03005e-17	1.66297e-16	GEMIN5	stable	15.7791
ENSG00000160753	2127.28	0.418406	0.0492734	8.49153	2.03939e-17	1.66969e-16	RUSC1	stable	15.7774
ENSG00000168066	7003.28	0.258563	0.0304886	8.48063	2.2397e-17	1.83268e-16	SF1	stable	15.7369
ENSG00000049239	1354.65	-0.465074	0.054862	-8.47715	2.3078e-17	1.8863e-16	H6PD	stable	15.7244
ENSG00000170889	20102	-0.290554	0.034296	-8.47195	2.41329e-17	1.97143e-16	RPS9	stable	15.7052
ENSG00000153944	6559.39	-0.272637	0.032183	-8.47147	2.42323e-17	1.97846e-16	MSI2	stable	15.7037
ENSG00000213339	2046.6	0.40144	0.0473992	8.46934	2.46787e-17	2.01379e-16	QTRT1	stable	15.696
ENSG00000074695	5969.29	0.285428	0.033712	8.46666	2.52521e-17	2.05944e-16	LMAN1	stable	15.6863
ENSG00000079785	4149.92	0.315077	0.0372227	8.46465	2.56933e-17	2.09426e-16	DDX1	stable	15.679
ENSG00000071553	5090.52	-0.290687	0.0343444	-8.46387	2.5865e-17	2.10709e-16	ATP6AP1	stable	15.6763
ENSG00000147813	2293.63	-0.389278	0.0459934	-8.46378	2.58845e-17	2.10751e-16	NAPRT	stable	15.6762
ENSG00000187555	2652.14	0.365554	0.0431973	8.46243	2.61859e-17	2.1297e-16	USP7	stable	15.6717
ENSG00000197958	14472.2	-0.225695	0.0266896	-8.45628	2.76046e-17	2.24384e-16	RPL12	stable	15.649
ENSG00000144791	3804.11	-0.306431	0.036239	-8.45585	2.77065e-17	2.25088e-16	LIMD1	stable	15.6476
ENSG00000198720	1426.97	0.466888	0.0552189	8.45522	2.7856e-17	2.26179e-16	ANKRD13B	stable	15.6455
ENSG00000079156	1117.88	0.502224	0.0594559	8.447	2.9888e-17	2.4241e-16	OSBPL6	stable	15.6154
ENSG00000170144	11201.6	0.251402	0.0297666	8.44576	3.02071e-17	2.44863e-16	HNRNPA3	stable	15.6111
ENSG00000110811	3507.96	0.334471	0.039605	8.44515	3.03648e-17	2.46007e-16	P3H3	stable	15.6091
ENSG00000179242	1555.59	0.440657	0.0521842	8.44426	3.05965e-17	2.47748e-16	CDH4	stable	15.606
ENSG00000006634	1282.42	0.473385	0.056071	8.44259	3.10378e-17	2.51045e-16	DBF4	stable	15.6002
ENSG00000169764	2936.67	-0.344674	0.0408298	-8.44174	3.12643e-17	2.52739e-16	UGP2	stable	15.5973
ENSG00000152492	1466.83	0.447875	0.0530867	8.43668	3.2649e-17	2.63787e-16	CCDC50	stable	15.5787
ENSG00000169258	1396.18	0.463284	0.0550074	8.42222	3.69423e-17	2.97822e-16	GPRIN1	stable	15.526
ENSG00000188070	2217.02	-0.438412	0.0520614	-8.42106	3.73091e-17	3.00615e-16	C11orf95	stable	15.522
ENSG00000196449	974.494	0.533888	0.0634227	8.41794	3.83161e-17	3.0856e-16	YRDC	stable	15.5107
ENSG00000087365	9139.67	0.238643	0.0283528	8.4169	3.86592e-17	3.11153e-16	SF3B2	stable	15.507
ENSG00000173402	5848.58	0.300802	0.0357522	8.41352	3.97877e-17	3.20061e-16	DAG1	stable	15.4948
ENSG00000168528	1530.67	-0.457853	0.0545802	-8.38862	4.91873e-17	3.95457e-16	SERINC2	stable	15.4029
ENSG00000101493	2976.39	-0.330321	0.0393932	-8.38523	5.06256e-17	4.06799e-16	ZNF516	stable	15.3906
ENSG00000136710	754.824	-0.583685	0.0696234	-8.38346	5.13942e-17	4.12525e-16	CCDC115	stable	15.3845
ENSG00000158545	2113.24	0.392051	0.0468809	8.3627	6.12981e-17	4.91485e-16	ZC3H18	stable	15.3085
ENSG00000167695	1568.56	0.474886	0.056787	8.36257	6.13659e-17	4.91761e-16	FAM57A	stable	15.3082
ENSG00000155368	7148.8	-0.283914	0.0339713	-8.35747	6.40789e-17	5.13223e-16	DBI	stable	15.2897
ENSG00000135454	1747.34	0.433088	0.0518273	8.35637	6.46804e-17	5.17759e-16	B4GALNT1	stable	15.2859
ENSG00000050344	1380.05	0.447115	0.0535212	8.35399	6.59955e-17	5.28e-16	NFE2L3	stable	15.2774
ENSG00000090372	6657.93	0.289969	0.0347296	8.34935	6.86424e-17	5.48878e-16	STRN4	stable	15.2605
ENSG00000136425	938.382	-0.539879	0.0646765	-8.34737	6.98007e-17	5.57838e-16	CIB2	stable	15.2535
ENSG00000112715	7207.07	-0.309478	0.0370787	-8.34652	7.03033e-17	5.6155e-16	VEGFA	stable	15.2506
ENSG00000172725	3540.29	-0.344481	0.0412834	-8.34429	7.16419e-17	5.71622e-16	CORO1B	stable	15.2429
ENSG00000170312	1765.02	0.427021	0.0511769	8.34401	7.18099e-17	5.72653e-16	CDK1	stable	15.2421
ENSG00000105875	1066.39	-0.499473	0.0599686	-8.32892	8.15842e-17	6.50247e-16	WDR91	stable	15.1869
ENSG00000165704	1190.79	0.468226	0.0562231	8.32799	8.22245e-17	6.54996e-16	HPRT1	stable	15.1838
ENSG00000198931	2218.87	0.446025	0.0535929	8.32246	8.61551e-17	6.85936e-16	APRT	stable	15.1637
ENSG00000182827	1461.72	-0.436537	0.052508	-8.31374	9.27358e-17	7.37134e-16	ACBD3	stable	15.1325
ENSG00000130313	1891.29	-0.467154	0.0562509	-8.30483	9.9964e-17	7.92879e-16	PGLS	stable	15.1008
ENSG00000182871	1078.79	0.526058	0.0633495	8.30407	1.00606e-16	7.97538e-16	COL18A1	stable	15.0982
ENSG00000080345	2884.1	0.349274	0.042095	8.29728	1.06524e-16	8.43547e-16	RIF1	stable	15.0739
ENSG00000106144	2302	0.373046	0.0449884	8.29205	1.11314e-16	8.8006e-16	CASP2	stable	15.0555
ENSG00000077232	2653.62	0.354869	0.0428497	8.28171	1.21415e-16	9.58893e-16	DNAJC10	stable	15.0182
ENSG00000003989	750.444	0.571277	0.0690178	8.27725	1.26051e-16	9.94972e-16	SLC7A2	stable	15.0022
ENSG00000185090	1906.21	0.404443	0.0489017	8.27054	1.33354e-16	1.05205e-15	MANEAL	stable	14.978
ENSG00000111445	1064.69	0.532611	0.0644562	8.26316	1.4187e-16	1.11745e-15	RFC5	stable	14.9518
ENSG00000155980	942.451	-0.56558	0.0685047	-8.25607	1.50544e-16	1.1845e-15	KIF5A	stable	14.9265
ENSG00000163655	2466.71	0.372543	0.0451376	8.25348	1.53843e-16	1.20981e-15	GMPS	stable	14.9173
ENSG00000031698	9029.16	0.2441	0.0295976	8.24728	1.62044e-16	1.27362e-15	SARS	stable	14.895
ENSG00000116199	1620.74	0.43436	0.0526736	8.24626	1.63428e-16	1.28381e-15	FAM20B	stable	14.8915
ENSG00000094631	1574.35	-0.414983	0.0503696	-8.23874	1.7403e-16	1.36565e-15	HDAC6	stable	14.8647
ENSG00000167536	1374.64	-0.445138	0.054052	-8.23536	1.79014e-16	1.404e-15	DHRS13	stable	14.8526
ENSG00000105401	7746.66	0.259278	0.0314946	8.23246	1.83408e-16	1.43771e-15	CDC37	stable	14.8423
ENSG00000143815	2507.52	0.355387	0.0431742	8.23146	1.84939e-16	1.44893e-15	LBR	stable	14.839
ENSG00000075711	1206.17	0.515317	0.0626167	8.22971	1.87671e-16	1.46955e-15	DLG1	stable	14.8328
ENSG00000162073	1187.31	0.471875	0.0573413	8.22925	1.88395e-16	1.47366e-15	PAQR4	stable	14.8316
ENSG00000242485	2236.83	0.371286	0.0452226	8.2102	2.20815e-16	1.72543e-15	MRPL20	stable	14.7631
ENSG00000124767	3742.36	0.302247	0.0368151	8.20987	2.21426e-16	1.72928e-15	GLO1	stable	14.7621
ENSG00000172531	5953.2	0.275537	0.0335664	8.20871	2.2358e-16	1.74403e-15	PPP1CA	stable	14.7584
ENSG00000138085	2059.34	-0.371235	0.0452248	-8.20866	2.23669e-16	1.74403e-15	ATRAID	stable	14.7584
ENSG00000133639	1030.01	-0.491523	0.0600912	-8.17962	2.84735e-16	2.21082e-15	BTG1	stable	14.6554
ENSG00000147475	2444.98	-0.349476	0.0427288	-8.17893	2.86376e-16	2.22239e-15	ERLIN2	stable	14.6532
ENSG00000106511	3148.55	-0.314762	0.0384957	-8.17655	2.92081e-16	2.26547e-15	MEOX2	stable	14.6448
ENSG00000096063	2179.39	0.394081	0.048207	8.17476	2.96445e-16	2.2969e-15	SRPK1	stable	14.6389
ENSG00000108773	2702.95	0.374876	0.0459113	8.16524	3.20804e-16	2.48303e-15	KAT2A	stable	14.605
ENSG00000106554	2094.88	0.453768	0.0556344	8.15626	3.45557e-16	2.67041e-15	CHCHD3	stable	14.5734
ENSG00000123130	759.165	0.563933	0.0691577	8.1543	3.51209e-16	2.71266e-15	ACOT9	stable	14.5666
ENSG00000099204	1412.74	0.435989	0.053489	8.15102	3.60882e-16	2.78446e-15	ABLIM1	stable	14.5553
ENSG00000136877	1833	0.421406	0.0517775	8.13878	3.99268e-16	3.07741e-15	FPGS	stable	14.5118
ENSG00000083312	4333.46	0.298968	0.0367413	8.1371	4.04848e-16	3.11879e-15	TNPO1	stable	14.506
ENSG00000162413	2079.87	0.397509	0.048864	8.13502	4.11873e-16	3.17125e-15	KLHL21	stable	14.4988
ENSG00000102974	1530.98	0.43669	0.0536847	8.13435	4.14138e-16	3.18703e-15	CTCF	stable	14.4966
ENSG00000171703	1308.01	-0.512139	0.0630471	-8.12312	4.54365e-16	3.49294e-15	TCEA2	stable	14.4568
ENSG00000107130	2155.38	0.37045	0.0456197	8.12039	4.64676e-16	3.56849e-15	NCS1	stable	14.4475
ENSG00000110047	3034.45	0.331913	0.0408758	8.12004	4.66028e-16	3.57701e-15	EHD1	stable	14.4465
ENSG00000066044	4470.68	0.298225	0.0367282	8.11979	4.66999e-16	3.58259e-15	ELAVL1	stable	14.4458
ENSG00000120278	1302.94	0.472072	0.0581425	8.11922	4.69185e-16	3.59749e-15	PLEKHG1	stable	14.444
ENSG00000023191	4978.52	0.327288	0.0403351	8.11422	4.88904e-16	3.74674e-15	RNH1	stable	14.4263
ENSG00000163536	976.065	-0.511234	0.0630221	-8.11198	4.98022e-16	3.81463e-15	SERPINI1	stable	14.4185
ENSG00000070018	2578.35	-0.385786	0.0475645	-8.11079	5.0291e-16	3.85007e-15	LRP6	stable	14.4145
ENSG00000107581	8696.04	0.25023	0.0308546	8.11	5.06207e-16	3.8733e-15	EIF3A	stable	14.4119
ENSG00000114391	7130.73	-0.245189	0.030241	-8.10784	5.15257e-16	3.9405e-15	RPL24	stable	14.4044
ENSG00000125970	5732.29	0.303383	0.0374227	8.10692	5.19182e-16	3.96788e-15	RALY	stable	14.4014
ENSG00000138413	3390.54	-0.327755	0.0404293	-8.10688	5.19375e-16	3.96788e-15	IDH1	stable	14.4014
ENSG00000173334	1065.77	0.500348	0.0617374	8.10446	5.29824e-16	4.04561e-15	TRIB1	stable	14.393
ENSG00000106479	861.267	-0.52952	0.0653757	-8.09965	5.51158e-16	4.20633e-15	ZNF862	stable	14.3761
ENSG00000154845	2591.83	0.365906	0.0451908	8.09692	5.63669e-16	4.29958e-15	PPP4R1	stable	14.3666
ENSG00000106344	2003.84	0.388618	0.048034	8.09047	5.94338e-16	4.52649e-15	RBM28	stable	14.3442
ENSG00000163840	765.447	-0.563281	0.0697004	-8.08146	6.39947e-16	4.8663e-15	DTX3L	stable	14.3128
ENSG00000146966	3915.18	0.287453	0.0355949	8.07568	6.7102e-16	5.0947e-15	DENND2A	stable	14.2929
ENSG00000104964	8274.15	-0.265783	0.0329199	-8.07364	6.82335e-16	5.17528e-15	AES	stable	14.2861
ENSG00000197183	1443.44	-0.43977	0.0544695	-8.07369	6.82057e-16	5.17528e-15	NOL4L	stable	14.2861
ENSG00000198795	1404.32	-0.435333	0.053931	-8.07205	6.91282e-16	5.24044e-15	ZNF521	stable	14.2806
ENSG00000244405	3545.96	-0.317459	0.0393337	-8.07092	6.97727e-16	5.28658e-15	ETV5	stable	14.2768
ENSG00000075218	1567.71	0.403224	0.0499667	8.06985	7.03836e-16	5.33013e-15	GTSE1	stable	14.2733
ENSG00000101745	1070.85	-0.536391	0.0664776	-8.06876	7.1018e-16	5.37541e-15	ANKRD12	stable	14.2696
ENSG00000177189	1155.07	0.488959	0.0606144	8.06671	7.22175e-16	5.46059e-15	RPS6KA3	stable	14.2628
ENSG00000119487	2188.56	0.370983	0.0460027	8.06437	7.36165e-16	5.56067e-15	MAPKAP1	stable	14.2549
ENSG00000111961	1160	-0.472261	0.0585674	-8.06355	7.41098e-16	5.59506e-15	SASH1	stable	14.2522
ENSG00000084710	1309.78	0.445285	0.0552301	8.06236	7.48367e-16	5.64704e-15	EFR3B	stable	14.2482
ENSG00000112658	1556.46	0.445765	0.0553068	8.05986	7.63822e-16	5.76072e-15	SRF	stable	14.2395
ENSG00000153113	2078.5	0.399407	0.0495639	8.05843	7.72776e-16	5.82527e-15	CAST	stable	14.2347
ENSG00000130638	2754.8	0.328381	0.0407843	8.05166	8.16795e-16	6.15079e-15	ATXN10	stable	14.2111
ENSG00000117298	2396.7	0.366194	0.0454863	8.05064	8.23627e-16	6.19908e-15	ECE1	stable	14.2077
ENSG00000113648	4007.34	0.304613	0.0378964	8.03804	9.12848e-16	6.86359e-15	H2AFY	stable	14.1634
ENSG00000153107	1696.44	0.444239	0.05527	8.03762	9.16007e-16	6.88384e-15	ANAPC1	stable	14.1622
ENSG00000100749	1253.73	0.496174	0.0617526	8.03486	9.36851e-16	7.0333e-15	VRK1	stable	14.1528
ENSG00000175550	2981.14	0.355949	0.0443316	8.02926	9.80658e-16	7.35843e-15	DRAP1	stable	14.1332
ENSG00000089351	3850.79	-0.301253	0.0375246	-8.02816	9.89475e-16	7.41704e-15	GRAMD1A	stable	14.1298
ENSG00000105364	1990.08	0.482198	0.060067	8.02766	9.93506e-16	7.44347e-15	MRPL4	stable	14.1282
ENSG00000100413	2141.02	0.362929	0.0452397	8.02236	1.03734e-15	7.76399e-15	POLR3H	stable	14.1099
ENSG00000128059	1286.5	0.464158	0.0579179	8.01407	1.10977e-15	8.30187e-15	PPAT	stable	14.0808
ENSG00000074047	1330.41	0.448057	0.0559174	8.01283	1.12095e-15	8.38126e-15	GLI2	stable	14.0767
ENSG00000168785	4351.41	0.274937	0.0343132	8.01259	1.12322e-15	8.39396e-15	TSPAN5	stable	14.076
ENSG00000101577	2444.06	-0.35243	0.044021	-8.00595	1.1855e-15	8.85493e-15	LPIN2	stable	14.0528
ENSG00000176597	837.454	0.545117	0.0681037	8.00423	1.2022e-15	8.97508e-15	B3GNT5	stable	14.047
ENSG00000270647	3072.73	0.398005	0.049737	8.0022	1.22218e-15	9.11963e-15	TAF15	stable	14.04
ENSG00000069869	1143.79	0.461276	0.0577122	7.99269	1.32023e-15	9.84127e-15	NEDD4	stable	14.0069
ENSG00000165283	3381.12	0.317882	0.0397766	7.99169	1.33097e-15	9.91631e-15	STOML2	stable	14.0036
ENSG00000167881	2608.85	0.331629	0.0415038	7.99034	1.3457e-15	1.0021e-14	SRP68	stable	13.9991
ENSG00000124541	1451.96	0.492508	0.0616852	7.98421	1.4142e-15	1.05258e-14	RRP36	stable	13.9777
ENSG00000145362	2077.96	-0.425029	0.0532521	-7.98145	1.44628e-15	1.07591e-14	ANK2	stable	13.9682
ENSG00000145592	7815.5	-0.556489	0.0697451	-7.97891	1.47632e-15	1.09771e-14	RPL37	stable	13.9595
ENSG00000170382	828.398	-0.569407	0.071395	-7.97544	1.51834e-15	1.12838e-14	LRRN2	stable	13.9475
ENSG00000149257	24465.7	0.235574	0.0295382	7.97522	1.52106e-15	1.12983e-14	SERPINH1	stable	13.947
ENSG00000153187	20671.8	0.198615	0.0249139	7.97207	1.56038e-15	1.15846e-14	HNRNPU	stable	13.9361
ENSG00000160326	1898.2	0.366819	0.0460321	7.96877	1.60259e-15	1.18859e-14	SLC2A6	stable	13.925
ENSG00000164308	912.748	-0.52232	0.0655486	-7.96843	1.60698e-15	1.19125e-14	ERAP2	stable	13.924
ENSG00000116221	3813.84	0.318127	0.0399254	7.96803	1.6122e-15	1.19452e-14	MRPL37	stable	13.9228
ENSG00000172175	831.468	0.534733	0.0671617	7.96188	1.69447e-15	1.25484e-14	MALT1	stable	13.9014
ENSG00000156467	932.511	-0.508268	0.06385	-7.96034	1.71567e-15	1.2699e-14	UQCRB	stable	13.8962
ENSG00000197081	3777.85	0.348796	0.0438294	7.95803	1.74795e-15	1.29315e-14	IGF2R	stable	13.8884
ENSG00000152767	3256.25	0.30956	0.0389006	7.95773	1.75218e-15	1.29563e-14	FARP1	stable	13.8875
ENSG00000170921	2176.12	-0.408945	0.0514196	-7.95308	1.81925e-15	1.3432e-14	TANC2	stable	13.8719
ENSG00000183495	2608.62	0.400021	0.0502992	7.95284	1.82291e-15	1.34523e-14	EP400	stable	13.8712
ENSG00000163931	8812.28	0.247148	0.0310959	7.94794	1.89632e-15	1.3987e-14	TKT	stable	13.8543
ENSG00000130844	810.336	0.579801	0.0729804	7.94461	1.94808e-15	1.43616e-14	ZNF331	stable	13.8428
ENSG00000182175	3058.7	0.346617	0.0436357	7.94343	1.96671e-15	1.44917e-14	RGMA	stable	13.8389
ENSG00000185627	2906.64	0.357829	0.0450724	7.93897	2.03864e-15	1.50142e-14	PSMD13	stable	13.8235
ENSG00000138326	11227.7	-0.27336	0.0344343	-7.93861	2.0446e-15	1.50506e-14	RPS24	stable	13.8224
ENSG00000178035	3872.7	0.30247	0.0381067	7.93745	2.06379e-15	1.51843e-14	IMPDH2	stable	13.8186
ENSG00000103932	1367.53	0.422636	0.0532634	7.93483	2.10779e-15	1.54926e-14	RPAP1	stable	13.8099
ENSG00000147649	2311.37	0.345668	0.043592	7.92962	2.19824e-15	1.61493e-14	MTDH	stable	13.7918
ENSG00000087269	1097.62	0.490205	0.0618484	7.92592	2.26469e-15	1.66209e-14	NOP14	stable	13.7793
ENSG00000168389	826.918	0.549371	0.0693212	7.92501	2.28136e-15	1.67314e-14	MFSD2A	stable	13.7765
ENSG00000137207	2002.16	-0.377189	0.047613	-7.92197	2.33771e-15	1.71227e-14	YIPF3	stable	13.7664
ENSG00000115307	3098.99	0.311266	0.0393199	7.91624	2.448e-15	1.79127e-14	AUP1	stable	13.7468
ENSG00000084090	5106.11	0.270044	0.0341211	7.91429	2.48664e-15	1.81864e-14	STARD7	stable	13.7403
ENSG00000197256	4549.85	0.27311	0.0345352	7.90815	2.61246e-15	1.90971e-14	KANK2	stable	13.719
ENSG00000160447	1546.29	0.425656	0.053837	7.90639	2.6496e-15	1.9359e-14	PKN3	stable	13.7131
ENSG00000185658	1545.47	-0.404514	0.0512041	-7.90004	2.78817e-15	2.03413e-14	BRWD1	stable	13.6916
ENSG00000136240	8933.73	0.252285	0.0319366	7.89956	2.79893e-15	2.04096e-14	KDELR2	stable	13.6902
ENSG00000137822	913.632	0.578159	0.0732239	7.89577	2.88529e-15	2.10289e-14	TUBGCP4	stable	13.6772
ENSG00000150459	1988.42	-0.361933	0.0458796	-7.88876	3.05199e-15	2.22329e-14	SAP18	stable	13.653
ENSG00000136280	2486.8	0.339425	0.0430275	7.88856	3.05696e-15	2.22581e-14	CCM2	stable	13.6525
ENSG00000165934	2048.2	0.392425	0.0497644	7.88565	3.12891e-15	2.27595e-14	CPSF2	stable	13.6428
ENSG00000131153	1010.04	0.503968	0.0639129	7.88524	3.13938e-15	2.28244e-14	GINS2	stable	13.6416
ENSG00000136478	1410.73	0.421232	0.05345	7.88086	3.25131e-15	2.36265e-14	TEX2	stable	13.6266
ENSG00000159199	1689.09	0.445344	0.0565523	7.87489	3.41033e-15	2.47576e-14	ATP5MC1	stable	13.6063
ENSG00000086712	1069.24	0.527344	0.0669688	7.87446	3.42215e-15	2.48312e-14	TXLNG	stable	13.605
ENSG00000125691	11107.4	-0.271334	0.0344624	-7.87336	3.45248e-15	2.5039e-14	RPL23	stable	13.6014
ENSG00000168461	2025.73	0.366002	0.0465137	7.86868	3.58415e-15	2.59684e-14	RAB31	stable	13.5856
ENSG00000055483	1543.97	0.443351	0.0563574	7.86677	3.63907e-15	2.63533e-14	USP36	stable	13.5792
ENSG00000106689	880.495	0.52695	0.0670219	7.86236	3.7695e-15	2.72711e-14	LHX2	stable	13.5643
ENSG00000087303	1488.66	0.418072	0.0531796	7.86151	3.79534e-15	2.74445e-14	NID2	stable	13.5615
ENSG00000131591	1123.03	0.475163	0.0604705	7.85776	3.91076e-15	2.82653e-14	C1orf159	stable	13.5487
ENSG00000123146	3733.07	0.307177	0.039107	7.85478	4.00459e-15	2.89293e-14	ADGRE5	stable	13.5387
ENSG00000164091	3800.68	0.303822	0.0387285	7.84492	4.3323e-15	3.12506e-14	WDR82	stable	13.5051
ENSG00000184220	827.969	0.548664	0.0699401	7.84476	4.33781e-15	3.12751e-14	CMSS1	stable	13.5048
ENSG00000154358	1014.76	-0.522083	0.066683	-7.82934	4.90446e-15	3.52915e-14	OBSCN	stable	13.4523
ENSG00000162377	1128.39	0.505902	0.0646296	7.82771	4.96835e-15	3.57338e-14	COA7	stable	13.4469
ENSG00000155438	1414.02	0.481081	0.0614644	7.82699	4.99685e-15	3.59212e-14	NIFK	stable	13.4446
ENSG00000198918	7034.03	-0.291727	0.0372758	-7.82618	5.02926e-15	3.6119e-14	RPL39	stable	13.4423
ENSG00000109320	1221.71	0.509981	0.0651631	7.82623	5.02701e-15	3.6119e-14	NFKB1	stable	13.4423
ENSG00000143320	912.478	-0.497497	0.0635691	-7.82607	5.03341e-15	3.61312e-14	CRABP2	stable	13.4421
ENSG00000165175	2361.04	0.371309	0.0474532	7.82475	5.08672e-15	3.64961e-14	MID1IP1	stable	13.4378
ENSG00000167972	4641.02	0.273897	0.0350255	7.81993	5.28518e-15	3.79015e-14	ABCA3	stable	13.4213
ENSG00000166887	1800.08	-0.383502	0.0490716	-7.81514	5.49001e-15	3.93111e-14	VPS39	stable	13.4055
ENSG00000104731	877.248	0.52288	0.0669065	7.81509	5.49241e-15	3.93111e-14	KLHDC4	stable	13.4055
ENSG00000169992	4452.41	-0.308698	0.0395168	-7.81181	5.63736e-15	4.0329e-14	NLGN2	stable	13.3944
ENSG00000105429	4931.57	-0.28016	0.0358828	-7.80765	5.82647e-15	4.16617e-14	MEGF8	stable	13.3803
ENSG00000129003	2330.31	-0.420147	0.053815	-7.80724	5.84526e-15	4.17758e-14	VPS13C	stable	13.3791
ENSG00000174705	3431.67	0.350941	0.044953	7.80684	5.86399e-15	4.18893e-14	SH3PXD2B	stable	13.3779
ENSG00000176595	902.258	-0.530447	0.067952	-7.8062	5.89375e-15	4.20815e-14	KBTBD11	stable	13.3759
ENSG00000137710	5950.32	0.254879	0.0326638	7.80312	6.03949e-15	4.31012e-14	RDX	stable	13.3655
ENSG00000109654	1649.15	-0.395283	0.0507	-7.7965	6.36458e-15	4.53992e-14	TRIM2	stable	13.343
ENSG00000112312	1162.96	0.474012	0.0608514	7.78966	6.71919e-15	4.79055e-14	GMNN	stable	13.3196
ENSG00000164877	1065.8	0.485004	0.0622894	7.78631	6.89926e-15	4.91418e-14	MICALL2	stable	13.3085
ENSG00000175334	5287.59	0.293603	0.0377159	7.7846	6.99349e-15	4.97889e-14	BANF1	stable	13.3029
ENSG00000188529	5158.92	0.259781	0.0333833	7.78176	7.15238e-15	5.08955e-14	SRSF10	stable	13.2933
ENSG00000152894	1591.44	-0.388028	0.0498908	-7.77755	7.39426e-15	5.25913e-14	PTPRK	stable	13.2791
ENSG00000165684	1283.97	0.449022	0.0577633	7.77349	7.63515e-15	5.42522e-14	SNAPC4	stable	13.2656
ENSG00000197461	796.482	0.525773	0.0676687	7.76982	7.85974e-15	5.58212e-14	PDGFA	stable	13.2532
ENSG00000143013	12227.9	-0.203569	0.0262349	-7.75947	8.5282e-15	6.04231e-14	LMO4	stable	13.2188
ENSG00000197747	1021.97	0.499085	0.0643712	7.75323	8.95823e-15	6.3409e-14	S100A10	stable	13.1978
ENSG00000183955	1576.24	0.397722	0.0513024	7.7525	9.00985e-15	6.37437e-14	KMT5A	stable	13.1956
ENSG00000058668	2608.73	-0.349754	0.0451254	-7.75071	9.13773e-15	6.45865e-14	ATP2B4	stable	13.1899
ENSG00000167088	2315.85	0.336042	0.0433608	7.74991	9.19611e-15	6.49679e-14	SNRPD1	stable	13.1873
ENSG00000119711	862.371	-0.537224	0.069369	-7.74444	9.60061e-15	6.77931e-14	ALDH6A1	stable	13.1688
ENSG00000106261	2643.73	-0.371258	0.0479606	-7.74089	9.87237e-15	6.96453e-14	ZKSCAN1	stable	13.1571
ENSG00000185104	2330.16	0.341004	0.044078	7.73638	1.02288e-14	7.21251e-14	FAF1	stable	13.1419
ENSG00000171681	2228.74	-0.382377	0.0494569	-7.73152	1.06272e-14	7.48989e-14	ATF7IP	stable	13.1255
ENSG00000144231	1523.64	0.440198	0.05695	7.72954	1.07934e-14	7.60337e-14	POLR2D	stable	13.119
ENSG00000115761	961.102	0.486094	0.062933	7.72399	1.12746e-14	7.93856e-14	NOL10	stable	13.1003
ENSG00000139722	1849.15	0.425304	0.0550651	7.72367	1.13026e-14	7.95446e-14	VPS37B	stable	13.0994
ENSG00000185880	987.865	-0.480446	0.0622182	-7.72196	1.14554e-14	8.05816e-14	TRIM69	stable	13.0938
ENSG00000156011	3949.73	-0.35078	0.045454	-7.71725	1.18871e-14	8.35782e-14	PSD3	stable	13.0779
ENSG00000020577	980.489	0.530824	0.068819	7.71334	1.22563e-14	8.61333e-14	SAMD4A	stable	13.0648
ENSG00000196083	3230.5	0.325977	0.0422683	7.71209	1.23775e-14	8.69022e-14	IL1RAP	stable	13.061
ENSG00000161179	1449.6	0.525873	0.0682142	7.70914	1.26669e-14	8.88493e-14	YDJC	stable	13.0513
ENSG00000124098	1501.33	-0.423422	0.0549308	-7.70829	1.27512e-14	8.93981e-14	FAM210B	stable	13.0487
ENSG00000198952	4382.11	0.32244	0.041844	7.70576	1.30067e-14	9.11461e-14	SMG5	stable	13.0403
ENSG00000008282	3130.13	-0.307986	0.0399823	-7.70306	1.32849e-14	9.30511e-14	SYPL1	stable	13.0313
ENSG00000129932	1232.37	0.529496	0.0687417	7.70269	1.33236e-14	9.32778e-14	DOHH	stable	13.0302
ENSG00000143322	1016.5	0.483137	0.062733	7.70148	1.34501e-14	9.4119e-14	ABL2	stable	13.0263
ENSG00000182606	1959.87	-0.358524	0.0465983	-7.69393	1.42684e-14	9.96559e-14	TRAK1	stable	13.0015
ENSG00000107263	2097	0.395443	0.0514018	7.69318	1.43519e-14	1.00191e-13	RAPGEF1	stable	12.9992
ENSG00000076003	3396.76	0.310478	0.0403591	7.69289	1.43843e-14	1.0037e-13	MCM6	stable	12.9984
ENSG00000180304	2195.46	-0.381628	0.049633	-7.689	1.48295e-14	1.03281e-13	OAZ2	stable	12.986
ENSG00000198885	653.8	0.56832	0.0739646	7.68368	1.54583e-14	1.07609e-13	ITPRIPL1	stable	12.9682
ENSG00000104613	3684.5	-0.278798	0.0362989	-7.68063	1.58311e-14	1.10153e-13	INTS10	stable	12.958
[truncated: 12,739 more rows]

## Sheet: GO BP enrichment
GO:BP enrichment(stiff up)
	ONTOLOGY	ID	Description	GeneRatio	BgRatio	pvalue	p.adjust	qvalue	geneID	Count
GO:0006261	BP	GO:0006261	DNA-templated DNA replication	43/901	169/21069	9.04983e-22	4.91315e-18	4.02003e-18	RECQL4/MCM7/TONSL/HMGA1/CDC6/DDX21/DDX11/MCM8/GINS4/POLE/CDC45/CHTF18/MCM2/MCM10/CARM1/MCM4/FEN1/RBBP8/RFC2/CDT1/GINS1/LIG1/POLA1/E2F7/CENPX/POLD3/ORC6/FBXO5/BLM/E2F8/DONSON/POLQ/POLA2/TWNK/DSCC1/MMS22L/BRCA2/TRAIP/TIPIN/ALYREF/CCNE2/MCIDAS/CENPS	43
GO:0006260	BP	GO:0006260	DNA replication	55/901	308/21069	1.24587e-19	3.38191e-16	2.76714e-16	RECQL4/MCM7/RRM2/TONSL/HMGA1/CDC6/DDX21/DDX11/CHAF1A/SSRP1/MCM8/GINS4/POLE/CDC45/CHTF18/GRWD1/MCM2/MCM10/CARM1/MCM4/FEN1/RBBP8/RFC2/CDT1/GINS1/RUVBL1/LIG1/ESCO2/POLA1/E2F7/CENPX/POLD3/ORC6/FBXO5/PCLAF/BLM/E2F8/UCHL5/FAM111B/DONSON/CHAF1B/POLQ/POLA2/TWNK/DSCC1/MMS22L/BRCA2/TRAIP/TIPIN/S100A11/ALYREF/CCNE2/MCIDAS/RNASEH2A/CENPS	55
GO:0000070	BP	GO:0000070	mitotic sister chromatid segregation	34/901	213/21069	3.17452e-11	5.74482e-08	4.70051e-08	CDCA5/SMC5/KPNB1/ACTB/CDC6/SMARCD1/TRIP13/AURKB/KIF11/NUDC/SEH1L/NCAPG2/ZWINT/KIF18B/NCAPH2/TUBG1/NCAPG/NCAPH/BUB1B/CDT1/KIF23/SPC24/ESCO2/FBXO5/ESPL1/RRS1/CDCA8/DSCC1/CENPK/SPC25/HASPIN/SLF1/DUSP1/TEX14	34
GO:0044786	BP	GO:0044786	cell cycle DNA replication	15/901	42/21069	8.71907e-11	9.48624e-08	7.76181e-08	CDC45/MCM2/MCM4/FEN1/CDT1/GINS1/LIG1/POLA1/E2F7/FBXO5/BLM/E2F8/DONSON/BRCA2/TIPIN	15
GO:0031589	BP	GO:0031589	cell-substrate adhesion	47/901	411/21069	9.0748e-10	6.15839e-07	5.0389e-07	SERPINE1/CD44/CCN1/THBS1/ITGA7/ACTN1/ADAM9/FLNA/ZYX/NF2/VCL/AJUBA/ADAMTS9/CD63/CORO1C/ITGB8/LAMB1/MACF1/PXN/C1QBP/CLASP1/DLC1/ITGA3/COL5A3/CD34/ROCK2/PLAU/ITGA5/NRP1/PDGFB/ITGA2/LIMS1/THSD1/PDPN/ARHGAP6/ANGPT2/SDC4/AKIP1/LAMB3/EMP2/ITGA1/EFNA5/CCN2/GBP1/NDNF/SFRP1/ACER2	47
GO:0007160	BP	GO:0007160	cell-matrix adhesion	36/901	273/21069	1.98987e-09	1.20033e-06	9.82135e-07	SERPINE1/CD44/THBS1/ITGA7/ACTN1/ADAM9/ZYX/NF2/VCL/AJUBA/ADAMTS9/CD63/CORO1C/ITGB8/MACF1/PXN/CLASP1/DLC1/ITGA3/COL5A3/CD34/ROCK2/PLAU/ITGA5/NRP1/ITGA2/LIMS1/THSD1/ARHGAP6/SDC4/EMP2/ITGA1/EFNA5/CCN2/SFRP1/ACER2	36
GO:0016072	BP	GO:0016072	rRNA metabolic process	36/901	292/21069	1.2152e-08	4.12333e-06	3.37378e-06	CAVIN1/NOP56/NCL/PRKDC/POLR1E/BOP1/PA2G4/MARS1/EBNA1BP2/DDX21/NOLC1/DKC1/MRTO4/DDX11/TCOF1/RRP12/DHX37/UTP20/NOL6/WDR43/URB1/MDN1/UTP4/RRP1/NOP58/EMG1/RRP9/LYAR/RRS1/BYSL/UTP15/POLR1G/RCL1/MRM1/LOC102724159/PWP2	36
GO:0033627	BP	GO:0033627	cell adhesion mediated by integrin	18/901	90/21069	4.00666e-08	8.60299e-06	7.03912e-06	LIF/EPHA2/SERPINE1/ITGA7/ADAM9/PODXL/PIEZO1/ITGB8/ITGA3/PLAU/ITGA5/ITGA2/EMILIN2/ITGA1/CYP1B1/LYN/SFRP2/ACER2	18
GO:0035329	BP	GO:0035329	hippo signaling	13/901	46/21069	4.02353e-08	8.60299e-06	7.03912e-06	AMOTL2/NF2/NUAK2/AJUBA/AMOTL1/WWC1/MAP2K3/WWC2/TEAD4/WTIP/SCHIP1/FAT4/SHANK2	13
GO:0006302	BP	GO:0006302	double-strand break repair	35/901	315/21069	2.58768e-07	3.69698e-05	3.02494e-05	RECQL4/MCM7/PRKDC/CDCA5/SMC5/TONSL/ACTB/DDX11/SMARCD1/MCM8/TRIP13/GINS4/FANCD2/CDC45/RAD54L/FOXM1/MCM2/HMGA2/MCM4/FEN1/RBBP8/RUVBL1/ESCO2/POLA1/BLM/CGAS/RAD51AP1/H2AX/POLQ/DCLRE1B/MMS22L/BRCA2/AUNIP/SLF1/FANCB	35

## Sheet: GSEA_stiff_vs_soft
GSEA_stiff_vs_soft_signature
ID	Description	setSize	enrichmentScore	NES	pvalue	p.adjust	qvalue	rank	leading_edge	core_enrichment
Palmer_2012GB_stemcell	Pan_stemness	125	0.449659	1.6687	0.00177907	0.0124535	0.00561811	3008	tags=44%, list=20%, signal=35%	INHBE/HMGA2/DIAPH3/CDC25A/RRAS2/MTHFD1L/PFAS/ROR1/MCM10/KIF11/DACT1/IARS/KIF23/BUB1B/CCL26/GARS/IPO5/FANCB/SKP2/CENPI/MCM4/CCNA2/MTHFD2/ORC1/CENPH/MIS18A/MRPL3/XPOT/ASCC3/CDC123/PAICS/RPF2/POLE2/MSH2/DIMT1/FGF2/NDC80/PRIM1/HAT1/ACTRT3/ICMT/ATP11C/BCAT1/RAD1/DCUN1D5/XRCC5/DEPDC1B/FST/EIF2B3/XXYLT1/HAUS1/UBE2K/DDX1/HAUS6/MCM6
Mirandaa_2019PNAS_cancer_stemness	Cancer_stemness	101	0.398196	1.42206	0.0196915	0.0361015	0.0162864	2953	tags=39%, list=20%, signal=32%	INHBE/HMGA2/DIAPH3/RRAS2/MTHFD1L/PFAS/ROR1/DACT1/IARS/CCL26/GARS/IPO5/FANCB/CENPI/MTHFD2/ORC1/CENPH/MIS18A/MRPL3/XPOT/ASCC3/CDC123/PAICS/RPF2/DIMT1/FGF2/HAT1/ACTRT3/ICMT/ATP11C/RAD1/DCUN1D5/XRCC5/FST/EIF2B3/XXYLT1/HAUS1/UBE2K/DDX1/HAUS6
