# Supplementary material
Source: Research Square preprint supplement (doi:10.21203/rs.3.rs-6009404/v1)
Supplement: Supplementary file 5 [file 20d27071aae468a3997c4ad2.xlsx]

## Sheet: GSE59612_ssGSEA_stiff_score
Matrix stiffness and cancer stemness scores of GBM tissues from different regions
GSE59612	Group	Z_score (Matrix stiffness)	Z_score (Cancer_stemnes)
BJ025	Non-tumor	-1.27138	-1.27757
BJ026	Non-tumor	-1.38693	-1.09755
BJ027	Non-tumor	-1.78226	-0.8716
BJ028	Non-tumor	-1.2205	-1.1439
BJ029	Non-tumor	-1.21314	-0.815515
BJ030	Non-tumor	-1.06938	-1.06461
BJ031	Non-tumor	-1.1265	-1.08485
BJ024	Non-tumor	-1.10421	-1.25928
JJ015	Non-tumor	-1.39186	-1.01876
JJ013	Non-tumor	-0.878885	-1.42677
JJ014	Non-tumor	-1.49022	-1.35054
AP001	Non-tumor	-1.28076	-1.26822
AP002	Non-tumor	-0.997229	-1.39055
AP003	Non-tumor	-1.19457	-1.0008
AP004	Non-tumor	-1.26534	-1.20177
AP005	Non-tumor	-1.49806	-0.717138
AP006	Non-tumor	-1.19786	-1.29344
BJ003	Edge	0.0748579	1.01729
BJ007	Edge	-0.0895913	-1.12394
BJ008	Edge	0.286515	-1.04227
BJ012	Edge	1.02068	1.20203
BJ013	Edge	1.19198	1.24592
BJ015	Edge	-1.30487	-0.937303
BJ016	Edge	-1.40434	-1.35294
BJ018	Edge	0.270153	0.10139
BJ020	Edge	-0.331388	-0.388435
BJ021	Edge	-0.0517508	-0.141917
PC121	Edge	0.151492	1.00201
PC122	Edge	-0.63792	-0.21567
PC126	Edge	-1.02751	-0.908831
PC127	Edge	-1.28617	-1.17056
PC65Human	Edge	-0.715771	-0.791458
PC128	Edge	-0.686603	-0.649066
PC129	Edge	-1.20052	-1.43925
PC66Human	Edge	-0.523835	-1.02478
PC134	Edge	-0.233	-0.340212
PC68Human	Edge	0.847815	0.96141
PC137	Edge	1.53158	0.668733
PC60Human	Edge	-0.0944663	-0.867666
PC72Human	Edge	-1.23717	-1.11816
PC139	Edge	0.0531002	-0.415216
PC110	Edge	-0.720038	-0.501027
PC114	Edge	-0.657876	-1.00684
PC116	Edge	-0.58821	-0.652677
PC55Human	Edge	-0.739725	-0.400763
PC53Human	Edge	-0.721642	-0.875229
PC117	Edge	-0.303022	0.233765
PC57Human	Edge	-0.583288	-0.983093
PC61Human	Edge	0.978743	1.2006
PC119	Edge	-1.3452	-0.873828
JJ034	Edge	0.65358	0.809118
JJ036	Edge	-0.485393	-0.737743
JJ038	Edge	-1.15555	-0.937363
PC124	Core	0.363142	1.4196
PC47Human	Core	0.496997	1.3389
PC125	Core	0.554129	1.13727
PC130	Core	0.258481	-0.111985
PC131	Core	0.311255	0.0497936
PC63Human	Core	0.499763	0.0768279
PC132	Core	0.522303	0.196101
PC133	Core	0.617658	0.334497
PC64Human	Core	0.42054	-0.252989
PC135	Core	0.909595	0.727191
PC67Human	Core	0.88314	1.41955
PC136	Core	1.38844	0.787643
PC71Human	Core	0.574825	0.162891
PC138	Core	0.961692	0.3472
PC140	Core	1.1413	0.256037
PC141	Core	1.21355	0.95891
PC112	Core	0.115524	1.11574
PC123	Core	0.295061	1.44558
PC115	Core	1.77877	2.00929
PC52Human	Core	-0.0874176	-0.164582
PC56Human	Core	0.145746	-0.704039
PC118	Core	-0.648549	0.29977
PC120	Core	1.31292	0.930704
BJ001	Core	1.67691	1.28796
BJ002	Core	0.91959	0.520512
BJ004	Core	1.21247	1.00686
BJ005	Core	2.01008	1.15947
BJ006	Core	1.65091	1.03447
BJ009	Core	1.3467	1.46277
BJ010	Core	1.49116	1.41167
BJ011	Core	1.51704	1.32788
BJ014	Core	1.04369	1.25015
BJ017	Core	0.865208	0.489942
BJ019	Core	0.909025	0.572892
BJ022	Core	0.859864	1.19228
BJ023	Core	0.997648	1.37031
JJ035	Core	0.398285	1.29993
JJ037	Core	0.950957	1.40675
JJ039	Core	0.555055	1.16308
