# Supplementary material
Source: Research Square preprint supplement (doi:10.21203/rs.3.rs-6009404/v1)
Supplement: Supplementary file 6 [file 402499d212e83aea4e1ba2a4.xlsx]

## Sheet: Sheet1
		IQGAP3 IP			GSE54791 GSC vs DGC
name	ID	IP_vs_ctrl_p.val	IP_vs_ctrl_p.adj	IP_vs_ctrl_Log2FC	GSCvsDGC_logFoldChang	GSCvsDGC_P.Value	GSCvsDGC_adj.P.Val	GSCvsDGC_group
Pre-mRNA-splicing factor SYF1	XAB2	7.92e-06	6.52e-14	-8.41	0.774437	0.0619089	0.155915	stable
Cleavage and polyadenylation specificity factor subunit 3	CPSF3	8.97e-06	6.52e-14	-8.19	1.07771	0.000753966	0.00547843	UP
Cell division cycle 5-like protein	CDC5L	9.28e-06	6.52e-14	-7.79	0.600141	0.128292	0.266833	stable
Transcription elongation factor SPT4	SUPT4H1	1.34e-05	6.52e-14	-8.96	-0.382312	0.272735	0.455947	stable
TBC1 domain family member 4	TBC1D4	1.58e-05	6.52e-14	-9.14	0.079186	0.876854	0.944161	stable
Immunoglobulin kappa variable 1-6	IGKV1-6	1.71e-05	6.52e-14	-8.16	NA	NA	NA	NA
Peroxisomal sarcosine oxidase	PIPOX	2.48e-05	6.52e-14	-7.64	1.62034	0.0013881	0.00868867	UP
Large ribosomal subunit protein eL39	RPL39	3.03e-05	6.52e-14	-5.48	0.44983	0.230916	0.407257	stable
Toll-interacting protein	TOLLIP	3.96e-05	1.44e-12	5.03	-1.79908	6.63939e-06	0.000123483	DOWN
Lipoprotein lipase	LPL	4.05e-05	1.93e-12	-5.02	4.13485	6.87264e-06	0.000127071	UP
Chromodomain-helicase-DNA-binding protein 1	CHD1	4.85e-05	3.64e-11	4.92	0.406896	0.252405	0.432537	stable
Immunoglobulin kappa variable 4-1	IGKV4-1	5.12e-05	7.81e-11	-13.2	NA	NA	NA	NA
Protein mago nashi homolog 2	MAGOHB	5.9e-05	5.74e-10	4.71	0.506554	0.150438	0.299791	stable
Ubiquitin-like FUBI-ribosomal protein eS30 fusion protein	FAU	6.11e-05	8.82e-10	-4.86	0.377691	0.20086	0.368096	stable
Immunoglobulin heavy constant gamma 3	IGHG3	6.56e-05	2.14e-09	-4.45	NA	NA	NA	NA
Signal recognition particle subunit SRP68	SRP68	6.77e-05	3.03e-09	-6.66	0.0214621	0.981272	0.992805	stable
GATOR complex protein MIOS	MIOS	6.86e-05	3.46e-09	-6.15	-0.0233831	0.961152	0.983323	stable
Transcription factor SOX-9	SOX9	7.08e-05	4.93e-09	6.12	-1.78355	0.0494337	0.131809	stable
Isocitrate dehydrogenase [NAD] subunit alpha, mitochondrial	IDH3A	7.33e-05	7.26e-09	-5.41	0.238941	0.558834	0.732511	stable
Vasodilator-stimulated phosphoprotein	VASP	7.6e-05	1.08e-08	5.51	-1.97695	7.43229e-06	0.000135354	DOWN
RNA-binding protein EWS	EWSR1	7.88e-05	1.6e-08	-5.41	1.19891	0.00664188	0.0291366	UP
Matrix metalloproteinase-14	MMP14	8.16e-05	2.32e-08	4.25	-5.60587	2.49711e-11	3.85657e-09	DOWN
Protein CASC3	CASC3	9.01e-05	6.98e-08	-4.03	0.32762	0.317997	0.508207	stable
Splicing factor, arginine/serine-rich 19	SCAF1	9.61e-05	1.36e-07	-4.74	-0.108664	0.88662	0.949549	stable
Nesprin-2	SYNE2	0.000104555	3.13e-07	4.04	0.420964	0.366864	0.560001	stable
Unconventional myosin-Ib	MYO1B	0.000107602	4.08e-07	-4.57	-2.18107	0.0121372	0.0465992	DOWN
Immunoglobulin heavy variable 3-15	IGHV3-15	0.000115932	7.77e-07	-6.49	NA	NA	NA	NA
Small ribosomal subunit protein eS17	RPS17	0.000116126	7.87e-07	-4.02	0.207181	0.623462	0.782442	stable
Glutathione S-transferase 3, mitochondrial	MGST3	0.000117628	8.71e-07	3.88	1.03614	0.00494129	0.0233474	UP
Dihydrolipoyllysine-residue acetyltransferase component of pyruvate dehydrogenase complex, mitochondrial	DLAT	0.0001188	9.4e-07	-4.88	0.114945	0.793219	0.895957	stable
Band 4.1-like protein 5	EPB41L5	0.000120862	1.07e-06	-4.61	1.48915	0.00201792	0.0116998	UP
Remodeling and spacing factor 1	RSF1	0.00013164	2.28e-06	4.3	0.21925	0.600163	0.765474	stable
Structural maintenance of chromosomes flexible hinge domain-containing protein 1	SMCHD1	0.00013584	2.95e-06	3.93	0.801381	0.0190597	0.0646248	stable
Treacle protein	TCOF1	0.000146762	5.6e-06	3.55	0.173341	0.710507	0.845895	stable
Transforming protein RhoA	RHOA	0.0001517	7.24e-06	3.85	-0.197229	0.644349	0.797086	stable
Metastasis-associated protein MTA1	MTA1	0.000159486	1.05e-05	4.91	0.541863	0.0648545	0.161195	stable
Olfactory receptor 2L2	OR2L2	0.000161166	1.13e-05	-3.84	NA	NA	NA	NA
Probable ATP-dependent RNA helicase DDX41	DDX41	0.000182043	2.72e-05	-3.31	0.134611	0.818779	0.91098	stable
Keratin, type I cytoskeletal 9	KRT9	0.000186163	3.14e-05	-4.11	NA	NA	NA	NA
Transcription intermediary factor 1-alpha	TRIM24	0.000190014	3.58e-05	3.3	1.48025	0.00511374	0.0239467	UP
Type 1 phosphatidylinositol 4,5-bisphosphate 4-phosphatase	PIP4P1	0.000191689	3.78e-05	3.2	NA	NA	NA	NA
Chromobox protein homolog 1	CBX1	0.000196723	4.41e-05	3.91	-0.402476	0.197872	0.364869	stable
Protein ELYS	AHCTF1	0.000198764	4.68e-05	3.58	-0.0546764	0.914213	0.962877	stable
THO complex subunit 4	ALYREF	0.000199914	4.84e-05	-4.03	1.45467	0.000373605	0.00316589	UP
Chromosome-associated kinesin KIF4A	KIF4A	0.000201113	5e-05	-3.17	0.436175	0.210394	0.381057	stable
Retinitis pigmentosa 9 protein	RP9	0.000202924	5.26e-05	-3.28	0.823463	0.0173071	0.0601055	stable
26S proteasome regulatory subunit 8	PSMC5	0.000206271	5.78e-05	-3.2	0.264791	0.502877	0.685101	stable
Nuclear pore complex protein Nup133	NUP133	0.000219402	8.61e-05	3.96	0.196086	0.642692	0.795938	stable
Proteasome subunit alpha type-1	PSMA1	0.000222979	9.51e-05	-3.14	-0.147406	0.740971	0.865336	stable
Probable 28S rRNA (cytosine(4447)-C(5))-methyltransferase	NOP2	0.000229821	0.000114	4.48	0.787957	0.00819377	0.0343197	stable
Nuclear mitotic apparatus protein 1	NUMA1	0.000239743	0.000146	8.07	-0.113155	0.829811	0.917812	stable
Transient receptor potential cation channel subfamily M member 8	TRPM8	0.000240604	0.000149	-3.9	1.32226	0.00217195	0.0123832	UP
RNA transcription, translation and transport factor protein	RTRAF	0.000250463	0.000188	4.34	NA	NA	NA	NA
RNA-binding protein with serine-rich domain 1	RNPS1	0.000269206	0.000278	5.7	0.813767	0.000922037	0.00632891	stable
Inactive tyrosine-protein kinase PEAK1	PEAK1	0.000269793	0.000281	2.93	-1.09479	0.00595606	0.0268227	DOWN
Spondin-1	SPON1	0.000273875	0.000303	-4.3	NA	NA	NA	NA
Histone-lysine N-methyltransferase EHMT2	EHMT2	0.000279449	0.000335	2.88	0.87911	0.007645	0.0325052	stable
Proliferation marker protein Ki-67	MKI67	0.000279813	0.000337	5.03	0.941368	0.00121283	0.00782703	stable
LIM domain-containing protein 1	LIMD1	0.000283106	0.000357	3.15	0.97854	0.0416552	0.115709	stable
Nuclear pore complex protein Nup214	NUP214	0.000290504	0.000402	3.11	0.121829	0.792569	0.895649	stable
Tropomyosin beta chain	TPM2	0.000290601	0.000403	3.08	-3.83982	7.49849e-07	2.07599e-05	DOWN
THO complex subunit 3	THOC3	0.000296024	0.000437	-5.05	0.410663	0.250993	0.431224	stable
Chromatin assembly factor 1 subunit B	CHAF1B	0.000297031	0.000444	-3.35	0.669266	0.0232134	0.0749498	stable
Myosin light chain 6B	MYL6B	0.000301462	0.000473	-2.95	0.0322448	0.94662	0.977202	stable
Pericentrin	PCNT	0.000302059	0.000477	3.61	0.214556	0.614399	0.775593	stable
SUN domain-containing protein 2	SUN2	0.00030442	0.000493	-2.95	-0.711679	0.0128658	0.048429	stable
Girdin	CCDC88A	0.000307873	0.000516	3	0.741315	0.00706058	0.0305229	stable
Calreticulin	CALR	0.000310517	0.000535	2.91	-0.34964	0.307985	0.496082	stable
Ubiquitin-ribosomal protein eS31 fusion protein	RPS27A	0.00031311	0.000553	-2.89	0.418925	0.152469	0.302274	stable
Melanoma-associated antigen D2	MAGED2	0.000319874	0.000613	2.79	1.75311	2.73993e-11	4.17056e-09	UP
Lamin-B2	LMNB2	0.000327197	0.000682	2.77	0.272859	0.471005	0.658631	stable
Probable global transcription activator SNF2L1	SMARCA1	0.000330494	0.000714	4.14	-0.852752	0.00149371	0.00919518	stable
DBIRD complex subunit ZNF326	ZNF326	0.00033604	0.000769	2.9	1.14786	9.87912e-05	0.00112105	UP
Large ribosomal subunit protein eL43	RPL37A	0.000342019	0.00083	-2.78	0.928923	0.000414564	0.00342456	stable
Nuclear RNA export factor 1	NXF1	0.000348203	0.000896	4.72	0.197401	0.655166	0.805748	stable
Protein PML	PML	0.000350397	0.00092	3.23	-1.11193	0.0138635	0.0511855	stable
RNA-binding protein 28	RBM28	0.000351423	0.000931	-3.46	0.390079	0.348687	0.540059	stable
Ras-related protein Rab-6A	RAB6A	0.000377748	0.00132	3.27	-0.180688	0.677408	0.821559	stable
Alpha-aminoadipic semialdehyde dehydrogenase	ALDH7A1	0.000379578	0.00135	3.39	0.21415	0.621607	0.781289	stable
Splicing factor 3A subunit 1	SF3A1	0.000390936	0.00155	3.19	0.645943	0.00440936	0.0214186	stable
Glutamate-rich WD repeat-containing protein 1	GRWD1	0.000436114	0.00252	-2.84	-0.0107355	0.981143	0.992738	stable
Aldehyde dehydrogenase, mitochondrial	ALDH2	0.000447565	0.0028	-3.22	0.507274	0.16841	0.325277	stable
TNF receptor-associated factor 4	TRAF4	0.000459705	0.00312	2.86	2.12708	4.4009e-12	9.12203e-10	UP
Insulin-like growth factor 2 mRNA-binding protein 2	IGF2BP2	0.000461486	0.00317	-2.55	0.524533	0.17047	0.327752	stable
Thy-1 membrane glycoprotein	THY1	0.000465073	0.00326	4.14	-1.5767	0.000435683	0.00356907	DOWN
Mediator of DNA damage checkpoint protein 1	MDC1	0.000474477	0.00353	5.09	0.810347	0.00919888	0.0376292	stable
Beta-actin-like protein 2	ACTBL2	0.000474484	0.00353	5.64	NA	NA	NA	NA
Condensin-2 complex subunit G2	NCAPG2	0.000476974	0.0036	-2.89	-0.118917	0.789451	0.894029	stable
Probable ATP-dependent RNA helicase DDX56	DDX56	0.000481262	0.00372	2.87	1.03697	0.000433941	0.00355989	UP
Small ribosomal subunit protein eS24	RPS24	0.000501933	0.00435	-2.65	0.527766	0.150857	0.300284	stable
Baculoviral IAP repeat-containing protein 6	BIRC6	0.000507379	0.00453	3.7	-0.121198	0.782874	0.890558	stable
Helicase-like transcription factor	HLTF	0.000511939	0.00467	2.49	0.0671283	0.888888	0.95066	stable
Three-prime repair exonuclease 1	TREX1	0.00052191	0.005	3.56	0.551576	0.0936307	0.211404	stable
Serpin H1	SERPINH1	0.000523917	0.00507	-3.42	-2.78499	0.002143	0.0122491	DOWN
Liprin-alpha-1	PPFIA1	0.000526208	0.00514	3.91	-0.216107	0.6296	0.785891	stable
Immunoglobulin heavy variable 1-69	IGHV1-69	0.000547037	0.00589	-6.68	NA	NA	NA	NA
Histone H1.0	H1-0	0.000558258	0.00631	2.74	NA	NA	NA	NA
N-alpha-acetyltransferase 15, NatA auxiliary subunit	NAA15	0.000563173	0.00649	2.92	0.479638	0.144561	0.290951	stable
Immunoglobulin heavy variable 3-64D	IGHV3-64D	0.000566071	0.0066	-9.53	NA	NA	NA	NA
Nucleolar transcription factor 1	UBTF	0.000572932	0.00686	2.41	0.0559558	0.919148	0.966192	stable
Ras GTPase-activating protein-binding protein 2	G3BP2	0.000585512	0.00735	-2.65	-0.455623	0.0782525	0.18537	stable
Chromosome alignment-maintaining phosphoprotein 1	CHAMP1	0.000587223	0.00741	2.53	0.456867	0.32351	0.514314	stable
Exosome complex component MTR3	EXOSC6	0.00058746	0.00742	2.4	0.705702	0.00806641	0.0339125	stable
Hexokinase-2	HK2	0.000589041	0.00748	3.57	0.507367	0.228707	0.40448	stable
Replication factor C subunit 1	RFC1	0.000601518	0.00806	2.35	-0.268363	0.486063	0.671338	stable
2-iminobutanoate/2-iminopropanoate deaminase	RIDA	0.000639495	0.00994	-5.12	NA	NA	NA	NA
Pre-mRNA-processing factor 6	PRPF6	0.000642789	0.0101	2.78	0.233669	0.580541	0.749838	stable
Transcription activator BRG1	SMARCA4	0.000644482	0.0102	2.36	1.22436	5.91395e-06	0.000112109	UP
Kinesin-like protein KIF14	KIF14	0.000650987	0.0105	3.61	0.746147	0.0189282	0.0642484	stable
Aldo-keto reductase family 1 member B1	AKR1B1	0.000667399	0.0114	2.32	-0.054096	0.907457	0.959614	stable
Dermcidin	DCD	0.000674577	0.0118	-5.23	1.02905	0.00490701	0.0232202	UP
Zinc finger CCCH domain-containing protein 14	ZC3H14	0.000681468	0.0122	2.8	-0.572755	0.0517894	0.136542	stable
Actin-binding LIM protein 1	ABLIM1	0.000708563	0.0138	3.33	-1.36432	0.188072	0.351573	stable
Zinc finger MYM-type protein 3	ZMYM3	0.000732947	0.0153	-4.77	-0.297189	0.474779	0.661524	stable
SH3 domain-binding protein 4	SH3BP4	0.000740448	0.0158	2.73	-1.01702	0.0596075	0.151671	stable
Small ribosomal subunit protein uS7	RPS5	0.000740716	0.0158	-2.85	0.487045	0.146546	0.293932	stable
THO complex subunit 2	THOC2	0.000742832	0.0159	2.54	0.353418	0.380212	0.57354	stable
Sorting and assembly machinery component 50 homolog	SAMM50	0.000772197	0.0179	2.86	0.440623	0.0715276	0.17359	stable
Large ribosomal subunit protein bL36m	MRPL36	0.000773347	0.018	-4.54	-0.104244	0.837095	0.922538	stable
mRNA turnover protein 4 homolog	MRTO4	0.00079138	0.0192	2.85	1.0302	9.19049e-06	0.000160508	UP
Apoptosis-inducing factor 1, mitochondrial	AIFM1	0.000814764	0.0209	2.49	1.04212	0.000158597	0.00163507	UP
Small ribosomal subunit protein uS13	RPS18	0.00081755	0.021	-2.99	0.198254	0.677081	0.82135	stable
Nuclear pore complex protein Nup160	NUP160	0.000821157	0.0213	3.46	0.725897	0.0043804	0.0213042	stable
Gephyrin	GPHN	0.000841822	0.0228	2.35	1.16012	3.89083e-05	0.000529751	UP
Kinesin-like protein KIF21A	KIF21A	0.000858149	0.024	-2.29	3.07307	2.55753e-08	1.23966e-06	UP
THO complex subunit 6 homolog	THOC6	0.000869983	0.0248	3.39	0.220428	0.658678	0.807923	stable
Cysteine and glycine-rich protein 1	CSRP1	0.000874623	0.0252	-3.59	-2.72134	5.8089e-10	5.25905e-08	DOWN
Myelin expression factor 2	MYEF2	0.000883159	0.0258	2.15	0.585651	0.0695194	0.16971	stable
Histone-binding protein RBBP7	RBBP7	0.000916382	0.0282	2.29	-0.0569817	0.898237	0.955032	stable
Apoptotic chromatin condensation inducer in the nucleus	ACIN1	0.000928822	0.0292	2.6	0.574023	0.0382999	0.108612	stable
CD59 glycoprotein	CD59	0.000929562	0.0292	2.56	-2.55091	3.15547e-09	2.15187e-07	DOWN
Nuclear factor 1 C-type	NFIC	0.000930916	0.0293	2.06	-0.383394	0.330795	0.522101	stable
Actin-related protein 10	ACTR10	0.000931396	0.0293	2.24	-0.787227	0.0362507	0.104454	stable
Golgi-associated plant pathogenesis-related protein 1	GLIPR2	0.000932978	0.0295	3.08	0.664816	0.0710673	0.172579	stable
Glutaredoxin-3	GLRX3	0.000939538	0.0299	-2.44	-0.274387	0.478967	0.665066	stable
LEM domain-containing protein 2	LEMD2	0.000939663	0.03	2.89	-0.73025	0.0317617	0.0943329	stable
Transmembrane 9 superfamily member 3	TM9SF3	0.000953411	0.031	-2.25	-0.739662	0.0418828	0.116138	stable
Cadherin-4	CDH4	0.000990885	0.034	-4.15	0.970242	0.085668	0.198052	stable
Transcriptional repressor p66-beta	GATAD2B	0.000996388	0.0344	2.72	0.693804	0.0184855	0.0630852	stable
CAP-Gly domain-containing linker protein 2	CLIP2	0.00100688	0.0352	2.48	0.372259	0.523063	0.702038	stable
Small ribosomal subunit protein eS25	RPS25	0.00101062	0.0355	-2.16	0.102832	0.826937	0.916795	stable
Histone-lysine N-methyltransferase EHMT1	EHMT1	0.0010179	0.0361	3.12	0.574406	0.169077	0.32603	stable
WD repeat-containing protein 11	WDR11	0.00102928	0.037	2.73	-0.88725	0.00911292	0.0373454	stable
Ras-related protein Rap-1A	RAP1A	0.00104054	0.0378	-2.08	-0.181609	0.672214	0.817238	stable
Protein Wiz	WIZ	0.00104836	0.0385	3.04	0.312449	0.36965	0.563163	stable
Chromatin assembly factor 1 subunit A	CHAF1A	0.00106087	0.0394	3.07	0.655687	0.00234689	0.0130823	stable
Leucine-rich PPR motif-containing protein, mitochondrial	LRPPRC	0.00107033	0.0402	-2.3	1.54793	1.32811e-06	3.32618e-05	UP
Lipoamide acyltransferase component of branched-chain alpha-keto acid dehydrogenase complex, mitochondrial	DBT	0.00107765	0.0407	-5.7	0.472815	0.194286	0.360324	stable
PAT complex subunit CCDC47	CCDC47	0.00108901	0.0416	2.98	-0.111458	0.852901	0.931592	stable
2-oxoglutarate dehydrogenase complex component E1	OGDH	0.00109665	0.0422	1.94	1.00618	0.000442431	0.00361307	UP
ATPase family AAA domain-containing protein 2	ATAD2	0.00110392	0.0427	3.32	0.636807	0.0489542	0.130774	stable
N-acylneuraminate cytidylyltransferase	CMAS	0.00110525	0.0428	-1.98	-0.0616553	0.907363	0.959614	stable
Minor histocompatibility antigen H13	HM13	0.00110587	0.0429	1.96	0.305427	0.627955	0.785343	stable
Dedicator of cytokinesis protein 6	DOCK6	0.0011301	0.0447	2.76	-0.836102	0.0420901	0.11661	stable
Immunoglobulin kappa variable 2D-29	IGKV2D-29	0.00113517	0.0451	-3.49	NA	NA	NA	NA
Caprin-1	CAPRIN1	0.00113845	0.0454	-2.42	0.714996	0.0387246	0.109442	stable
B-cell receptor-associated protein 31	BCAP31	0.00115667	0.0467	4.49	-0.57208	0.0200641	0.067092	stable
Small ribosomal subunit protein uS12	RPS23	0.00116787	0.0476	-2.06	0.418457	0.233378	0.410267	stable
Peroxisomal multifunctional enzyme type 2	HSD17B4	0.00117114	0.0478	-1.96	-0.324209	0.434607	0.626268	stable
Neuromodulin	GAP43	0.00117157	0.0478	4.37	0.154838	0.745627	0.86807	stable
Serine/threonine-protein kinase MRCK beta	CDC42BPB	0.00117198	0.0479	3.5	-0.939919	0.000353879	0.00302764	stable
Ephrin type-A receptor 3	EPHA3	0.0011729	0.0479	2.45	0.699823	0.0378188	0.107596	stable
Ribosomal RNA processing protein 1 homolog B	RRP1B	0.00117556	0.0481	2.2	0.443445	0.179435	0.339736	stable
SRA stem-loop-interacting RNA-binding protein, mitochondrial	SLIRP	0.00117745	0.0483	3.83	0.834862	0.00518285	0.0241841	stable
Small ribosomal subunit protein uS19	RPS15	0.00118545	0.0489	-3.92	0.574859	0.0494434	0.131813	stable
Lon protease homolog, mitochondrial	LONP1	0.00119698	0.0499	3.25	0.701721	0.00769075	0.032638	stable
mRNA export factor RAE1	RAE1	0.00120569	0.0506	2.79	0.684105	0.0124176	0.0472989	stable
Crk-like protein	CRKL	0.00123225	0.0528	1.98	0.0432218	0.935205	0.972557	stable
Replication protein A 70 kDa DNA-binding subunit	RPA1	0.0012355	0.0531	2.16	0.380834	0.207615	0.377358	stable
Erbin	ERBIN	0.001243	0.0537	2.34	NA	NA	NA	NA
Caveolae-associated protein 1	CAVIN1	0.00124493	0.0539	1.99	NA	NA	NA	NA
Protein kinase C iota type	PRKCI	0.00127444	0.0565	1.87	-0.50099	0.132873	0.273579	stable
Proteasomal ubiquitin receptor ADRM1	ADRM1	0.00128658	0.0575	2.01	0.500862	0.117	0.249372	stable
5'-nucleotidase domain-containing protein 2	NT5DC2	0.00128665	0.0575	2.39	0.837574	0.00385259	0.0192422	stable
E3 ubiquitin-protein ligase RING1	RING1	0.00129678	0.0584	2.46	-0.262951	0.53089	0.708643	stable
Zinc finger CCCH domain-containing protein 18	ZC3H18	0.00130799	0.0594	2.66	0.714729	0.00110051	0.00726283	stable
Targeting protein for Xklp2	TPX2	0.00131921	0.0603	4.74	0.601799	0.0397877	0.111652	stable
Pescadillo homolog	PES1	0.00132717	0.061	2.68	1.37126	9.05746e-05	0.00104148	UP
Heat shock 70 kDa protein 4L	HSPA4L	0.00133126	0.0614	2.47	0.238773	0.614577	0.775694	stable
Nuclear distribution protein nudE homolog 1	NDE1	0.00135513	0.0634	3.79	0.253073	0.568694	0.741119	stable
E3 ubiquitin-protein ligase MIB1	MIB1	0.00135922	0.0637	2.01	0.335444	0.379791	0.573015	stable
Nucleoporin p58/p45	NUP58	0.00137217	0.0648	1.96	NA	NA	NA	NA
Actin, cytoplasmic 2	ACTG1	0.00137891	0.0654	-2.94	-1.33919	5.68235e-05	0.000709303	DOWN
Inner centromere protein	INCENP	0.00138029	0.0655	2.29	0.713874	0.0384119	0.108807	stable
Nucleoporin NUP188	NUP188	0.00139361	0.0666	2.83	0.516397	0.0552471	0.14319	stable
Nuclear pore complex protein Nup153	NUP153	0.00139704	0.0669	4.12	-0.210534	0.666891	0.814242	stable
Dixin	DIXDC1	0.0014271	0.0694	1.95	-1.72488	4.45669e-05	0.000587009	DOWN
Zinc finger protein 3	ZNF3	0.00142738	0.0694	-1.97	0.474309	0.243413	0.422851	stable
General transcription factor 3C polypeptide 3	GTF3C3	0.00144536	0.0709	-2.33	0.366943	0.427703	0.619674	stable
Small nuclear ribonucleoprotein-associated proteins B and B'	SNRPB	0.001452	0.0715	2.05	0.573576	0.0396722	0.111427	stable
AP-3 complex subunit beta-1	AP3B1	0.00145473	0.0717	-1.83	-0.607071	0.0307816	0.092183	stable
U1 small nuclear ribonucleoprotein A	SNRPA	0.00145629	0.0718	2.5	1.53015	1.11623e-06	2.89686e-05	UP
Mitogen-activated protein kinase kinase kinase kinase 3	MAP4K3	0.00147691	0.0735	1.77	0.253903	0.596705	0.763125	stable
Neuron navigator 2	NAV2	0.00148214	0.0739	1.78	-0.543923	0.216736	0.389386	stable
Protein-L-isoaspartate(D-aspartate) O-methyltransferase	PCMT1	0.00148728	0.0743	-2.26	-0.332664	0.394595	0.586793	stable
Probable RNA-binding protein 18	RBM18	0.00150189	0.0755	2.23	-0.339988	0.367015	0.560171	stable
Leucine zipper putative tumor suppressor 1	LZTS1	0.00150217	0.0755	-1.79	-0.347946	0.58615	0.754381	stable
Small ribosomal subunit protein uS15	RPS13	0.00150519	0.0757	-2.01	-0.237948	0.573016	0.744226	stable
GTP-binding protein Rheb	RHEB	0.00153603	0.0787	2.63	-0.750035	0.0365281	0.105005	stable
E3 ubiquitin-protein ligase TRIM47	TRIM47	0.0015464	0.0796	2.54	0.201848	0.694476	0.833783	stable
U2 snRNP-associated SURP motif-containing protein	U2SURP	0.00155382	0.0803	3.1	0.570797	0.107935	0.235304	stable
Inactive serine/threonine-protein kinase VRK3	VRK3	0.0015613	0.081	2.09	0.0505064	0.917599	0.96498	stable
Large ribosomal subunit protein uL15	RPL27A	0.00157275	0.0821	-1.96	0.64875	0.109173	0.237279	stable
Nuclear pore complex protein Nup88	NUP88	0.00159788	0.0845	2.04	0.902323	0.0154123	0.0553811	stable
Condensin complex subunit 2	NCAPH	0.00162456	0.087	1.89	1.0761	0.000866187	0.00602164	UP
Alpha-internexin	INA	0.00162907	0.0874	-3.38	1.13948	0.174702	0.333753	stable
Ribosomal protein eL22-like	RPL22L1	0.00163817	0.0882	-2.03	-0.140346	0.782609	0.890521	stable
PC4 and SFRS1-interacting protein	PSIP1	0.00164355	0.0887	1.76	1.06993	0.063214	0.158442	stable
Leucine-rich repeat and calponin homology domain-containing protein 2	LRCH2	0.00165336	0.0896	3.09	-0.98717	0.0341167	0.0997108	stable
Fibroblast growth factor 2	FGF2	0.00168592	0.0926	-1.77	-1.39895	0.000687561	0.0050719	DOWN
Utrophin	UTRN	0.00168972	0.093	1.72	-0.956335	0.0164072	0.0579384	stable
Zinc finger protein 512	ZNF512	0.00169838	0.0938	-2.23	0.993683	0.0107497	0.0424443	stable
E3 ubiquitin-protein ligase UHRF1	UHRF1	0.00171942	0.0957	2.77	0.834619	0.0154551	0.0554715	stable
Rab3 GTPase-activating protein non-catalytic subunit	RAB3GAP2	0.00171979	0.0957	2.78	0.575609	0.0648289	0.161182	stable
Cytoplasmic dynein 1 intermediate chain 2	DYNC1I2	0.0017258	0.0963	3.29	-0.115179	0.801142	0.900384	stable
Histone H1.2	H1-2	0.00175128	0.0988	3.32	NA	NA	NA	NA
Large ribosomal subunit protein uL29	RPL35	0.00175853	0.0995	-1.84	0.847724	0.000130297	0.00138781	stable
Pleckstrin homology-like domain family B member 2	PHLDB2	0.00177825	0.101	3.35	-2.77872	5.21184e-05	0.000664257	DOWN
Polyadenylate-binding protein 2	PABPN1	0.00182077	0.106	1.9	0.427441	0.149725	0.298711	stable
Transferrin receptor protein 1	TFRC	0.00186076	0.11	1.91	0.197215	0.640534	0.793639	stable
Nuclear pore complex protein Nup155	NUP155	0.00186898	0.111	2.96	0.455616	0.166416	0.322176	stable
PDZ and LIM domain protein 1	PDLIM1	0.00190577	0.114	2.86	-0.449198	0.187723	0.351141	stable
Cytoplasmic dynein 1 light intermediate chain 1	DYNC1LI1	0.00191121	0.115	-1.65	1.13374	0.0011928	0.00771671	UP
Exportin-7	XPO7	0.00192118	0.116	-2.09	0.0898019	0.85552	0.932536	stable
FACT complex subunit SPT16	SUPT16H	0.00192878	0.117	1.63	0.674117	0.0211144	0.069813	stable
Protein disulfide-isomerase A6	PDIA6	0.0019347	0.117	3.34	0.690381	0.017602	0.0608453	stable
THO complex subunit 1	THOC1	0.00197777	0.121	1.69	0.397593	0.293538	0.480024	stable
Plastin-3	PLS3	0.00197902	0.121	2.34	-4.2628	5.53271e-08	2.31046e-06	DOWN
GTP-binding protein SAR1a	SAR1A	0.00198035	0.122	-2.27	-0.70831	0.0250943	0.0791196	stable
Large ribosomal subunit protein eL36	RPL36	0.00199072	0.123	4.6	0.580357	0.0572475	0.147213	stable
Phosphoserine aminotransferase	PSAT1	0.0020247	0.126	1.65	0.201713	0.652712	0.804112	stable
DNA-directed RNA polymerases I, II, and III subunit RPABC1	POLR2E	0.00203892	0.127	2.63	0.562085	0.0227666	0.0738555	stable
Protein max	MAX	0.00206441	0.13	-2.17	-0.573305	0.172896	0.331258	stable
WD40 repeat-containing protein SMU1	SMU1	0.00207491	0.131	3.14	0.019855	0.965509	0.985146	stable
Low molecular weight phosphotyrosine protein phosphatase	ACP1	0.00207823	0.131	-2.02	0.684413	0.0151954	0.0548393	stable
Golgi integral membrane protein 4	GOLIM4	0.00208584	0.132	1.91	-0.0948255	0.836186	0.921859	stable
SPATS2-like protein	SPATS2L	0.00209196	0.132	2.62	-1.52002	1.53806e-05	0.000244245	DOWN
Large ribosomal subunit protein eL28	RPL28	0.00210642	0.134	1.61	0.355785	0.475633	0.662305	stable
AFG3-like protein 2	AFG3L2	0.00215359	0.138	-2.01	0.843252	0.0268584	0.083386	stable
N-alpha-acetyltransferase 10	NAA10	0.00218914	0.142	2.16	0.109061	0.841385	0.925186	stable
Brain-specific angiogenesis inhibitor 1-associated protein 2	BAIAP2	0.00219181	0.142	2.23	0.14356	0.74206	0.865709	stable
Nuclear factor 1 X-type	NFIX	0.00221773	0.144	1.97	-1.09828	0.0177614	0.061184	stable
182 kDa tankyrase-1-binding protein	TNKS1BP1	0.00222696	0.145	4.5	-1.59785	5.40285e-07	1.58199e-05	DOWN
Actin-binding protein WASF2	WASF2	0.00224739	0.147	1.56	-0.409496	0.262783	0.444546	stable
Serine/threonine-protein kinase PAK 4	PAK4	0.00227448	0.149	3.11	0.0397589	0.929801	0.969897	stable
E3 ubiquitin-protein ligase TRIM9	TRIM9	0.00227682	0.15	2.69	1.5684	0.00500274	0.0235741	UP
Spartin	SPART	0.00229199	0.151	1.56	NA	NA	NA	NA
Palladin	PALLD	0.0022977	0.151	2.48	-2.94967	1.44151e-12	3.72264e-10	DOWN
rRNA 2'-O-methyltransferase fibrillarin	FBL	0.00230852	0.152	-1.73	0.926256	0.00873084	0.0361464	stable
Merlin	NF2	0.00231375	0.153	2.36	-0.383082	0.237862	0.415829	stable
Plasma membrane calcium-transporting ATPase 1	ATP2B1	0.00232215	0.154	-1.93	0.0406483	0.93066	0.970007	stable
RNA-binding protein MEX3A	MEX3A	0.00232539	0.154	-1.55	2.00107	0.000101097	0.00114409	UP
Pinin	PNN	0.00234454	0.156	1.94	0.648909	0.0373785	0.106806	stable
Protein ERGIC-53	LMAN1	0.00236339	0.158	-1.67	-0.209711	0.616455	0.777441	stable
Transcription factor SOX-2	SOX2	0.00238406	0.16	3	5.23976	3.07085e-14	1.72768e-11	UP
Protein Shroom3	SHROOM3	0.00241749	0.163	-5.21	-1.87484	1.09351e-05	0.000185825	DOWN
DNA topoisomerase 2-alpha	TOP2A	0.00241828	0.163	3.26	0.618632	0.0196368	0.0661121	stable
LIM and calponin homology domains-containing protein 1	LIMCH1	0.00246348	0.167	-1.57	-1.79964	1.74664e-06	4.17523e-05	DOWN
Ubiquitin-associated protein 2-like	UBAP2L	0.00246978	0.168	-2.03	1.15192	0.00114727	0.0075116	UP
TRPM8 channel-associated factor 1	TCAF1	0.00247415	0.168	1.54	NA	NA	NA	NA
Double-stranded RNA-binding protein Staufen homolog 2	STAU2	0.00255264	0.175	3.31	0.00986547	0.982294	0.993015	stable
TAF6-like RNA polymerase II p300/CBP-associated factor-associated factor 65 kDa subunit 6L	TAF6L	0.00256053	0.176	-1.62	1.10267	0.000927329	0.0063514	UP
Polymerase delta-interacting protein 3	POLDIP3	0.00259554	0.179	-1.55	1.13041	1.1328e-05	0.0001906	UP
Sialic acid synthase	NANS	0.00259619	0.179	1.88	0.126364	0.772278	0.88468	stable
Endosome-associated-trafficking regulator 1	ENTR1	0.00261164	0.181	-2.11	NA	NA	NA	NA
RNA-binding protein RO60	RO60	0.0026167	0.181	2.59	NA	NA	NA	NA
Core histone macro-H2A.1	MACROH2A1	0.00266307	0.185	1.54	NA	NA	NA	NA
Aspartyl/asparaginyl beta-hydroxylase	ASPH	0.00268106	0.187	1.73	-0.331452	0.507554	0.689623	stable
Nucleolar GTP-binding protein 2	GNL2	0.00270216	0.189	3.17	0.910535	0.00613633	0.0274151	stable
Dynactin subunit 1	DCTN1	0.00270352	0.189	2.42	0.076774	0.887604	0.950345	stable
AP2-associated protein kinase 1	AAK1	0.0027186	0.19	1.6	-0.832656	0.036921	0.105749	stable
Carnitine O-palmitoyltransferase 1, liver isoform	CPT1A	0.00273011	0.191	2.78	-0.750861	0.134473	0.276007	stable
Nuclear pore complex protein Nup93	NUP93	0.00273136	0.191	1.58	1.39617	2.87051e-06	6.31413e-05	UP
Protein disulfide-isomerase A3	PDIA3	0.00277389	0.195	1.63	-0.419163	0.129979	0.26938	stable
Metastasis-associated protein MTA2	MTA2	0.0028232	0.199	3.7	0.368926	0.314001	0.503148	stable
LanC-like protein 2	LANCL2	0.0028237	0.199	2.01	0.41237	0.252717	0.432629	stable
Large ribosomal subunit protein uL23	RPL23A	0.00282742	0.2	-1.48	0.751648	0.00154344	0.00943805	stable
Myosin-14	MYH14	0.00282832	0.2	-1.52	4.32832	1.03454e-12	2.90453e-10	UP
Centrosomal protein of 68 kDa	CEP68	0.00284273	0.201	-4.71	-0.119968	0.792092	0.895366	stable
ATP-dependent RNA helicase DDX18	DDX18	0.00284514	0.201	2.61	0.696113	0.0382321	0.108459	stable
Copine-2	CPNE2	0.00290183	0.206	2.53	1.51458	0.000840672	0.00593329	UP
Splicing factor 1	SF1	0.00292808	0.209	2.85	0.688363	0.000730056	0.00532187	stable
WD repeat-containing protein 1	WDR1	0.00293645	0.209	2.46	-1.78114	2.04193e-07	6.96245e-06	DOWN
Dihydropyrimidinase-related protein 4	DPYSL4	0.00294408	0.21	1.56	1.52717	0.00208099	0.0119773	UP
Large ribosomal subunit protein uL14	RPL23	0.00294528	0.21	-1.58	0.625072	0.0751371	0.179556	stable
Far upstream element-binding protein 3	FUBP3	0.00299083	0.214	4.09	-0.160415	0.725814	0.856396	stable
Cofilin-2	CFL2	0.00303719	0.218	1.84	-1.91091	0.00137449	0.00862644	DOWN
Outer mitochondrial transmembrane helix translocase	ATAD1	0.00311815	0.225	1.72	-0.492762	0.10741	0.234484	stable
Bifunctional coenzyme A synthase	COASY	0.00313736	0.226	-1.44	0.105653	0.852115	0.931273	stable
NADH dehydrogenase [ubiquinone] 1 alpha subcomplex subunit 10, mitochondrial	NDUFA10	0.00314861	0.227	1.94	0.906439	0.0110698	0.0433896	stable
NADH-cytochrome b5 reductase 3	CYB5R3	0.00317739	0.23	-1.62	-1.14832	3.92886e-06	8.05878e-05	DOWN
Fatty acyl-CoA reductase 1	FAR1	0.0032048	0.232	1.67	-0.841351	0.0172274	0.0599219	stable
Translation initiation factor eIF-2B subunit delta	EIF2B4	0.00321903	0.233	2.78	0.604392	0.0641363	0.160066	stable
Ras-related protein Rab-18	RAB18	0.00322051	0.233	3.41	-0.533643	0.185702	0.348259	stable
Agrin	AGRN	0.0032252	0.234	1.65	1.35173	0.00411466	0.0202204	UP
Small ribosomal subunit protein eS7	RPS7	0.00322663	0.234	-1.49	0.862715	0.00383512	0.0191732	stable
Transcriptional enhancer factor TEF-1	TEAD1	0.003234	0.234	2.61	-1.51529	5.6328e-07	1.64321e-05	DOWN
PDZ and LIM domain protein 7	PDLIM7	0.00323872	0.235	1.51	0.368582	0.387946	0.58016	stable
Actin, cytoplasmic 1	ACTB	0.0032738	0.238	-1.53	-0.608177	0.0192304	0.0650829	stable
DENN domain-containing protein 2B	DENND2B	0.00327394	0.238	4.27	NA	NA	NA	NA
Ras-related protein Rab-2A	RAB2A	0.00328971	0.239	1.66	-0.187835	0.667456	0.814367	stable
Catenin delta-2	CTNND2	0.00329291	0.239	1.49	2.35558	0.00032289	0.00283731	UP
2',5'-phosphodiesterase 12	PDE12	0.00331783	0.241	-1.44	0.0609674	0.895058	0.953853	stable
Activity-dependent neuroprotector homeobox protein	ADNP	0.00332359	0.242	4.17	0.452561	0.191342	0.356332	stable
ATP-dependent 6-phosphofructokinase, muscle type	PFKM	0.00333322	0.242	-1.54	0.506286	0.114804	0.246078	stable
Nuclear pore complex protein Nup98-Nup96	NUP98	0.0033859	0.247	4.02	0.567644	0.143746	0.289828	stable
DNA mismatch repair protein Msh2	MSH2	0.00341626	0.25	-2.34	1.2791	0.000198015	0.00192908	UP
Immunoglobulin lambda-1 light chain	NA	0.00345684	0.253	-1.46	NA	NA	NA	NA
Elongation factor 1-alpha 1	EEF1A1	0.00346985	0.254	-1.46	0.173694	0.692419	0.832584	stable
POTE ankyrin domain family member I	POTEI	0.00347269	0.255	-3.15	NA	NA	NA	NA
Ras-related protein Rab-21	RAB21	0.0034934	0.257	2.47	-0.324561	0.383463	0.575852	stable
Serine palmitoyltransferase 1	SPTLC1	0.00350347	0.257	1.7	0.865929	0.0108105	0.0425959	stable
Stomatin	STOM	0.00352943	0.26	3.01	-1.4794	0.00146303	0.00904874	DOWN
EH domain-containing protein 2	EHD2	0.00355152	0.262	2.71	-2.46759	1.68038e-06	4.03522e-05	DOWN
Small ribosomal subunit protein uS5m	MRPS5	0.00357835	0.264	-1.69	0.420114	0.219029	0.392086	stable
L-xylulose reductase	DCXR	0.00361012	0.267	2.16	1.45977	6.12473e-06	0.000114997	UP
Small ribosomal subunit protein uS9	RPS16	0.00362191	0.268	-1.52	0.663678	0.0234023	0.0753281	stable
Huntingtin-interacting protein 1	HIP1	0.00363673	0.269	1.42	1.06432	0.0262745	0.0820745	stable
Glyceraldehyde-3-phosphate dehydrogenase	GAPDH	0.00364158	0.269	-1.63	0.838536	0.0176755	0.0609817	stable
DNA damage-binding protein 1	DDB1	0.00366657	0.271	1.81	0.373087	0.18941	0.353236	stable
Activating signal cointegrator 1 complex subunit 3	ASCC3	0.00368733	0.273	2.06	0.991193	0.0420492	0.116517	stable
Reticulocalbin-1	RCN1	0.00370817	0.275	1.91	-0.761467	0.0379958	0.107983	stable
Serine/threonine-protein phosphatase PP1-alpha catalytic subunit	PPP1CA	0.00371934	0.276	-1.38	0.267048	0.50948	0.691525	stable
Very long-chain specific acyl-CoA dehydrogenase, mitochondrial	ACADVL	0.00375616	0.279	1.49	-0.87909	0.000176406	0.00176889	stable
Chromodomain Y-like protein	CDYL	0.00375666	0.279	1.57	-0.0135699	0.975981	0.990442	stable
Eukaryotic translation initiation factor 3 subunit D	EIF3D	0.00375856	0.279	2.17	0.53808	0.0735849	0.177002	stable
Protein kinase C and casein kinase substrate in neurons protein 3	PACSIN3	0.00376848	0.28	1.49	1.17483	5.81388e-05	0.000722118	UP
Polypyrimidine tract-binding protein 3	PTBP3	0.00378245	0.281	1.76	0.201241	0.633367	0.788605	stable
BTB/POZ domain-containing protein KCTD14	KCTD14	0.00378411	0.281	1.75	-0.024913	0.972267	0.988452	stable
Protein LSM14 homolog A	LSM14A	0.00378872	0.281	-2.5	-0.0840485	0.888128	0.950522	stable
CTTNBP2 N-terminal-like protein	CTTNBP2NL	0.00379452	0.282	2.46	-1.28438	0.000229443	0.00216951	DOWN
Small ribosomal subunit protein eS26	RPS26	0.00381127	0.283	-1.41	0.523179	0.0726921	0.175497	stable
Eukaryotic translation initiation factor 3 subunit L	EIF3L	0.00384444	0.286	1.41	0.41208	0.161194	0.314598	stable
RNA cytidine acetyltransferase	NAT10	0.0038798	0.289	-1.32	0.387033	0.166201	0.321879	stable
Peroxiredoxin-2	PRDX2	0.00392736	0.292	-1.33	1.63299	0.000197514	0.00192539	UP
Importin subunit alpha-3	KPNA4	0.00393669	0.293	1.37	-0.803027	0.0586748	0.149952	stable
Histone H1.3	H1-3	0.00395401	0.295	5.48	NA	NA	NA	NA
Myosin phosphatase Rho-interacting protein	MPRIP	0.00396427	0.295	-1.34	-0.528161	0.257718	0.438663	stable
KN motif and ankyrin repeat domain-containing protein 2	KANK2	0.00401638	0.299	1.41	-1.4056	0.00356976	0.0180876	DOWN
Acetyl-CoA carboxylase 1	ACACA	0.00402021	0.3	1.74	0.756878	0.0494957	0.131908	stable
Small ribosomal subunit protein eS4, X isoform	RPS4X	0.00402724	0.3	-1.43	0.270066	0.482289	0.667442	stable
AP-2 complex subunit mu	AP2M1	0.0040313	0.301	-1.33	-0.559039	0.0378754	0.107718	stable
Solute carrier family 25 member 3	SLC25A3	0.00403522	0.301	-1.46	-0.0850324	0.847943	0.928726	stable
Phosphatidylinositol 4-phosphate 3-kinase C2 domain-containing subunit alpha	PIK3C2A	0.00408393	0.305	2.02	-0.353069	0.340142	0.531838	stable
Exosome RNA helicase MTR4	MTREX	0.00417522	0.311	1.83	NA	NA	NA	NA
U5 small nuclear ribonucleoprotein 40 kDa protein	SNRNP40	0.00419355	0.313	1.66	0.751496	0.0149111	0.0540607	stable
Pericentriolar material 1 protein	PCM1	0.00422858	0.315	1.73	0.247023	0.540316	0.717129	stable
DNA ligase 3	LIG3	0.00429547	0.32	2.79	1.01319	0.00249108	0.0137381	UP
Inorganic pyrophosphatase	PPA1	0.00430275	0.321	1.43	0.446511	0.200537	0.367675	stable
Serine/threonine-protein kinase DCLK1	DCLK1	0.0043092	0.321	1.8	-0.534669	0.326184	0.516783	stable
Methyl-CpG-binding domain protein 3	MBD3	0.00430989	0.321	1.55	0.254316	0.528842	0.707143	stable
Midkine	MDK	0.00431475	0.322	-4.39	-0.175785	0.738073	0.863413	stable
Nuclear receptor coactivator 5	NCOA5	0.00432388	0.322	1.37	0.251737	0.529406	0.707411	stable
Zinc transporter SLC39A7	SLC39A7	0.00432832	0.323	1.78	-0.472331	0.227078	0.402199	stable
Oligosaccharyltransferase complex subunit OSTC	OSTC	0.0043779	0.326	1.42	-0.333626	0.354294	0.546426	stable
Prelamin-A/C	LMNA	0.00437807	0.326	1.46	-1.06319	0.00632682	0.0280119	DOWN
Syndecan-3	SDC3	0.00438062	0.326	1.53	1.38147	0.000884593	0.00611721	UP
Coatomer subunit beta'	COPB2	0.00442192	0.329	1.49	-0.595064	0.0306318	0.0918631	stable
Inositol 1,4,5-trisphosphate receptor type 1	ITPR1	0.00442518	0.33	-1.5	-1.24371	0.000316814	0.00279752	DOWN
Serine/threonine-protein kinase VRK1	VRK1	0.00443223	0.33	1.88	1.29884	0.00023432	0.00220768	UP
FRAS1-related extracellular matrix protein 2	FREM2	0.00443451	0.33	-1.39	4.24255	2.44022e-14	1.6017e-11	UP
Kinesin-1 heavy chain	KIF5B	0.00445897	0.332	1.39	-0.472759	0.166482	0.322233	stable
Importin-4	IPO4	0.00445971	0.332	2.14	0.632435	0.0250355	0.0789716	stable
Splicing factor 3A subunit 3	SF3A3	0.00446142	0.332	1.75	0.76515	0.0238856	0.0762607	stable
C-terminal-binding protein 2	CTBP2	0.00449195	0.334	1.88	0.0251962	0.955132	0.981231	stable
D-beta-hydroxybutyrate dehydrogenase, mitochondrial	BDH1	0.00449867	0.335	-3.38	1.91225	0.00260136	0.0142214	UP
E3 ubiquitin-protein ligase DTX3L	DTX3L	0.00452391	0.337	1.3	-1.43501	0.00266611	0.0144775	DOWN
Aminoacyl tRNA synthase complex-interacting multifunctional protein 1	AIMP1	0.00454625	0.338	-1.51	-0.254304	0.523607	0.702537	stable
SRSF protein kinase 2	SRPK2	0.00457513	0.34	2.62	0.485205	0.18641	0.349336	stable
RNA-binding protein FUS	FUS	0.00458775	0.341	-2.2	1.46704	2.91388e-06	6.38418e-05	UP
Unconventional myosin-Vc	MYO5C	0.00463148	0.344	-1.28	0.455726	0.218535	0.391426	stable
Putative RNA-binding protein Luc7-like 2	LUC7L2	0.00466792	0.346	1.99	0.401683	0.250506	0.430622	stable
Sister chromatid cohesion protein PDS5 homolog B	PDS5B	0.00469285	0.348	2.28	0.534744	0.116195	0.248193	stable
Mitochondrial import receptor subunit TOM70	TOMM70	0.00470703	0.349	3.67	NA	NA	NA	NA
Peptidyl-prolyl cis-trans isomerase FKBP5	FKBP5	0.00472309	0.35	2.26	1.36248	0.000535277	0.00418888	UP
DNA-directed RNA polymerase, mitochondrial	POLRMT	0.00472446	0.35	2.81	0.69112	0.018317	0.0626596	stable
Large ribosomal subunit protein uL22	RPL17	0.00473233	0.351	-1.32	0.891608	0.00145748	0.00902857	stable
ATP-dependent RNA helicase DDX24	DDX24	0.00473261	0.351	2.46	0.0516299	0.966706	0.985792	stable
Importin subunit beta-1	KPNB1	0.00473678	0.351	-1.25	0.0668092	0.923061	0.968005	stable
Serine/threonine-protein kinase N2	PKN2	0.00475491	0.352	1.6	-0.450743	0.199943	0.3672	stable
Serine/arginine repetitive matrix protein 1	SRRM1	0.00475517	0.352	3.66	0.532942	0.0853058	0.197418	stable
Nucleolar and spindle-associated protein 1	NUSAP1	0.00476704	0.353	2.66	0.814508	0.00807014	0.0339191	stable
Small ribosomal subunit protein uS17	RPS11	0.00478833	0.354	-1.28	0.552509	0.115027	0.246366	stable
YTH domain-containing protein 1	YTHDC1	0.00488006	0.36	3.32	0.117913	0.79971	0.899524	stable
NHP2-like protein 1	SNU13	0.00488298	0.36	2.42	NA	NA	NA	NA
Albumin	ALB	0.00489976	0.361	-1.27	NA	NA	NA	NA
Glycogen [starch] synthase, muscle	GYS1	0.00491503	0.362	1.34	0.0349619	0.940919	0.975151	stable
Kinectin	KTN1	0.00491574	0.362	1.98	-0.845249	0.016632	0.0584569	stable
Drebrin-like protein	DBNL	0.00492054	0.363	2.05	-0.152423	0.730888	0.85938	stable
Fibroblast growth factor-binding protein 3	FGFBP3	0.00493764	0.364	1.42	4.68316	1.23093e-11	2.08616e-09	UP
GPI transamidase component PIG-T	PIGT	0.00494731	0.364	-1.39	-0.143419	0.741401	0.865368	stable
Signal recognition particle subunit SRP72	SRP72	0.00495834	0.365	2.63	-0.160657	0.750863	0.871372	stable
CUGBP Elav-like family member 1	CELF1	0.00497706	0.366	2.33	-0.256715	0.541809	0.718324	stable
TNF receptor-associated factor 2	TRAF2	0.00498032	0.366	1.29	0.720004	0.0252569	0.0794789	stable
Large ribosomal subunit protein eL42	RPL36A	0.00504087	0.37	3.47	-0.0699857	0.877311	0.944378	stable
Nucleoporin SEH1	SEH1L	0.00509297	0.373	3.27	0.802927	0.0164814	0.0581352	stable
Vimentin	VIM	0.00512228	0.375	-1.23	-1.8161	8.84928e-08	3.44204e-06	DOWN
Coronin-2B	CORO2B	0.0051323	0.376	-1.28	0.536252	0.207302	0.377032	stable
Glutathione peroxidase 7	GPX7	0.00515041	0.377	2.22	0.897974	0.360156	0.552437	stable
Tubulin-specific chaperone D	TBCD	0.0052166	0.381	2.5	0.44168	0.102365	0.226355	stable
Protein disulfide-isomerase A4	PDIA4	0.00521796	0.381	1.83	0.582008	0.103571	0.228573	stable
High mobility group protein HMG-I/HMG-Y	HMGA1	0.00524641	0.382	4.12	0.674177	0.336538	0.528352	stable
Small ribosomal subunit protein uS14	RPS29	0.0052471	0.382	-1.94	-0.253324	0.669253	0.815181	stable
Galectin-3	LGALS3	0.00525907	0.383	1.61	-2.93679	0.000329561	0.00287708	DOWN
ATP-dependent DNA helicase Q1	RECQL	0.00526529	0.384	1.37	-1.24907	0.00107693	0.00714312	DOWN
Transformer-2 protein homolog alpha	TRA2A	0.00536117	0.389	1.42	0.783318	0.00487715	0.0231136	stable
Lupus La protein	SSB	0.00539213	0.391	2.04	0.80114	0.00126548	0.00809381	stable
DNA repair protein XRCC1	XRCC1	0.00540537	0.392	3.22	0.262725	0.520586	0.700355	stable
Microtubule-associated protein 1B	MAP1B	0.00547082	0.395	1.47	-1.65447	0.000945398	0.00644249	DOWN
Myotubularin-related protein 13	SBF2	0.00551388	0.398	1.68	-0.724141	0.0366876	0.10529	stable
Host cell factor 1	HCFC1	0.00552644	0.398	2.69	0.926013	0.00124411	0.0079831	stable
Flap endonuclease 1	FEN1	0.00556138	0.4	1.68	0.395755	0.224129	0.398604	stable
DNA replication licensing factor MCM3	MCM3	0.00564543	0.405	-1.38	0.633053	0.0859549	0.198453	stable
Ras-related protein Rap-1b	RAP1B	0.00568497	0.407	3.2	-0.875605	0.00134056	0.00846066	stable
Histone deacetylase 1	HDAC1	0.00578166	0.412	1.39	0.456324	0.131904	0.272189	stable
Structural maintenance of chromosomes protein 1A	SMC1A	0.00580492	0.413	1.36	0.440784	0.440677	0.631836	stable
Plakophilin-4	PKP4	0.0058063	0.413	1.22	-0.0365363	0.939238	0.974307	stable
Ataxin-2-like protein	ATXN2L	0.00582593	0.414	3.64	0.591236	0.00885286	0.0365459	stable
Unconventional myosin-Va	MYO5A	0.005864	0.416	-1.17	0.152626	0.730047	0.858754	stable
Signal recognition particle 9 kDa protein	SRP9	0.00588935	0.417	3.27	-0.0664277	0.940067	0.974845	stable
Protein cordon-bleu	COBL	0.00590229	0.418	4.16	4.31671	7.51583e-13	2.24029e-10	UP
Golgi apparatus protein 1	GLG1	0.00596409	0.421	2.1	-0.0158764	0.977132	0.99097	stable
Protein EFR3 homolog B	EFR3B	0.00597924	0.422	1.29	0.429503	0.25216	0.432427	stable
Prolactin regulatory element-binding protein	PREB	0.00602792	0.424	1.35	-0.062907	0.898286	0.955032	stable
Myosin regulatory light chain 12B	MYL12B	0.00605435	0.426	-1.49	-0.665408	0.0361312	0.104225	stable
Glutathione S-transferase kappa 1	GSTK1	0.00607044	0.426	1.47	-0.642356	0.138226	0.281255	stable
Tubulin alpha-1B chain	TUBA1B	0.00607799	0.427	-1.16	0.535316	0.109545	0.237892	stable
GAS2-like protein 1	GAS2L1	0.0061237	0.429	-1.36	-0.713783	0.105452	0.231557	stable
UMP-CMP kinase	CMPK1	0.00613173	0.429	2.62	-0.622325	0.016674	0.0585783	stable
Nuclear pore glycoprotein p62	NUP62	0.00613724	0.43	2.62	0.0530129	0.927166	0.969122	stable
Enhancer of mRNA-decapping protein 3	EDC3	0.00613744	0.43	1.77	0.289039	0.430427	0.622237	stable
Synembryn-A	RIC8A	0.00613869	0.43	1.51	-1.13477	0.00150292	0.00923788	DOWN
Interferon-induced GTP-binding protein Mx2	MX2	0.0061538	0.431	-1.16	-0.839406	0.0816548	0.191244	stable
Transitional endoplasmic reticulum ATPase	VCP	0.00616647	0.431	2.49	0.305065	0.495	0.67883	stable
Large ribosomal subunit protein eL32	RPL32	0.00623388	0.434	1.64	0.432961	0.26078	0.442251	stable
Ribosome biogenesis protein BRX1 homolog	BRIX1	0.00623627	0.434	1.28	0.67803	0.0374897	0.106993	stable
Poly [ADP-ribose] polymerase 1	PARP1	0.00628286	0.437	1.25	1.25211	1.29487e-07	4.70003e-06	UP
Ras-related protein Rab-5B	RAB5B	0.00628771	0.437	-1.15	-0.525882	0.0722776	0.174819	stable
Transcription intermediary factor 1-beta	TRIM28	0.00632718	0.439	1.14	0.514349	0.0526624	0.138219	stable
Growth factor receptor-bound protein 2	GRB2	0.00643266	0.443	1.29	-0.0623948	0.922958	0.967999	stable
Histone H1.4	H1-4	0.00658234	0.45	1.97	NA	NA	NA	NA
Actin-related protein 2/3 complex subunit 5-like protein	ARPC5L	0.00658242	0.45	2.09	0.0386864	0.952538	0.979908	stable
Non-histone chromosomal protein HMG-17	HMGN2	0.00659103	0.451	2.82	1.27147	2.32503e-05	0.000345205	UP
Splicing factor 3B subunit 2	SF3B2	0.00664378	0.453	1.15	0.0746091	0.886044	0.949131	stable
Kinesin-like protein KIFC1	KIFC1	0.00665155	0.453	2.78	0.554319	0.0683878	0.167623	stable
Platelet-activating factor acetylhydrolase IB subunit beta	PAFAH1B1	0.00668056	0.454	2.17	-0.865984	0.00016107	0.00165623	stable
Protein Niban 1	NIBAN1	0.00668414	0.455	3.08	NA	NA	NA	NA
Monofunctional C1-tetrahydrofolate synthase, mitochondrial	MTHFD1L	0.0067236	0.456	2.3	0.76649	0.0947169	0.213032	stable
Periphilin-1	PPHLN1	0.00677564	0.458	2.74	-0.0256405	0.962186	0.983599	stable
Serine/threonine-protein kinase MARK1	MARK1	0.00679561	0.459	1.33	1.66884	0.000652742	0.00487632	UP
Destrin	DSTN	0.00682932	0.461	-1.71	-1.57722	9.59367e-05	0.00109355	DOWN
Haloacid dehalogenase-like hydrolase domain-containing 5	HDHD5	0.00687996	0.463	2.57	NA	NA	NA	NA
Small ribosomal subunit protein uS3	RPS3	0.00692414	0.465	-1.14	0.620681	0.110265	0.238993	stable
Reticulon-3	RTN3	0.00695036	0.466	-1.18	-0.178937	0.691063	0.831614	stable
Keratin, type II cytoskeletal 1	KRT1	0.00696628	0.466	-3.7	NA	NA	NA	NA
Pleiotropic regulator 1	PLRG1	0.00699204	0.467	1.7	-0.6068	0.0640526	0.159984	stable
Small ribosomal subunit protein uS11	RPS14	0.00700654	0.468	-1.2	0.15007	0.753468	0.873262	stable
Zinc finger RNA-binding protein	ZFR	0.00700704	0.468	3.44	-0.107199	0.818328	0.910691	stable
Multiple myeloma tumor-associated protein 2	MMTAG2	0.00709103	0.471	-1.42	NA	NA	NA	NA
Bystin	BYSL	0.00710288	0.472	2.56	0.828123	0.023178	0.0748663	stable
Protein FAM98A	FAM98A	0.00719121	0.475	-1.27	-0.418944	0.312664	0.501542	stable
Nucleoprotein TPR	TPR	0.00724037	0.477	2.41	0.00786812	0.990501	0.996065	stable
Ubiquitin-associated domain-containing protein 2	UBAC2	0.00729637	0.479	1.18	0.0239892	0.961574	0.983555	stable
YTH domain-containing family protein 1	YTHDF1	0.00729856	0.479	1.24	0.162757	0.792532	0.895649	stable
Protein transport protein Sec61 subunit beta	SEC61B	0.00733151	0.481	1.79	-0.0529304	0.920961	0.967	stable
Mevalonate kinase	MVK	0.00735025	0.481	1.55	1.42272	0.00142847	0.00889084	UP
Parafibromin	CDC73	0.00748133	0.486	1.13	-0.316961	0.437447	0.628873	stable
Chloride intracellular channel protein 1	CLIC1	0.00751169	0.487	-1.11	-1.21699	0.000379284	0.00319854	DOWN
MOB-like protein phocein	MOB4	0.00751721	0.487	1.4	-0.231094	0.574028	0.744943	stable
Exportin-5	XPO5	0.0075651	0.489	2.53	0.613296	0.126966	0.264712	stable
Microtubule-associated protein RP/EB family member 1	MAPRE1	0.00757404	0.489	1.94	0.210448	0.63871	0.792377	stable
Neurofibromin	NF1	0.00764023	0.492	2.01	-0.937022	0.0355492	0.10289	stable
Tropomyosin alpha-1 chain	TPM1	0.00766586	0.493	1.67	-2.08573	7.30221e-05	0.000868163	DOWN
Dephospho-CoA kinase domain-containing protein	DCAKD	0.00768832	0.494	1.34	0.812421	0.0421212	0.116649	stable
Myb-binding protein 1A	MYBBP1A	0.00775202	0.496	3.72	1.01723	0.00117073	0.00760755	UP
GTPase-activating protein and VPS9 domain-containing protein 1	GAPVD1	0.00777451	0.497	2.05	-0.565997	0.135577	0.27737	stable
cAMP-dependent protein kinase type I-alpha regulatory subunit	PRKAR1A	0.00777855	0.497	-1.48	-0.230285	0.575607	0.746238	stable
Homeobox protein MOX-2	MEOX2	0.00778859	0.497	2.09	-0.73385	0.496266	0.67974	stable
Vesicle-associated membrane protein-associated protein B/C	VAPB	0.0078115	0.498	1.09	-0.0523755	0.905924	0.958949	stable
Signal-induced proliferation-associated 1-like protein 1	SIPA1L1	0.0078729	0.5	-1.08	0.271685	0.492942	0.677187	stable
Kinesin heavy chain isoform 5C	KIF5C	0.0078763	0.5	3.24	2.12059	0.000179355	0.00179048	UP
Gamma-adducin	ADD3	0.0079032	0.501	1.41	-1.51742	0.000334466	0.00290615	DOWN
Mitochondrial import inner membrane translocase subunit TIM50	TIMM50	0.00798806	0.504	1.94	0.591284	0.0182444	0.0624791	stable
Histone-binding protein RBBP4	RBBP4	0.00799401	0.504	1.09	1.21962	0.00550378	0.025298	UP
Heterogeneous nuclear ribonucleoprotein D-like	HNRNPDL	0.00801809	0.505	1.14	NA	NA	NA	NA
Microtubule-actin cross-linking factor 1, isoforms 1/2/3/4/5	MACF1	0.00810173	0.508	1.13	-0.72379	0.0184364	0.0629449	stable
Echinoderm microtubule-associated protein-like 3	EML3	0.00811197	0.508	-2.45	-0.560292	0.117409	0.250006	stable
CTD small phosphatase-like protein 2	CTDSPL2	0.0081983	0.511	1.48	0.380533	0.362858	0.555338	stable
Serine/threonine-protein phosphatase PP1-gamma catalytic subunit	PPP1CC	0.00821202	0.511	-1.29	0.54393	0.0486782	0.130302	stable
Pyrroline-5-carboxylate reductase 1, mitochondrial	PYCR1	0.00821237	0.511	1.6	0.124632	0.779529	0.888883	stable
Elongin-B	ELOB	0.00824309	0.512	2.11	NA	NA	NA	NA
Heterogeneous nuclear ribonucleoprotein U-like protein 2	HNRNPUL2	0.00829066	0.514	1.24	-0.13604	0.754557	0.873753	stable
Large ribosomal subunit protein eL15	RPL15	0.00830841	0.514	1.3	0.294554	0.463007	0.652073	stable
Ras-related protein Rap-2c	RAP2C	0.00833398	0.515	-1.15	0.665807	0.0616668	0.155504	stable
RNA-binding protein 14	RBM14	0.00837089	0.516	-1.12	1.08678	6.25892e-06	0.000117178	UP
Delta(3,5)-Delta(2,4)-dienoyl-CoA isomerase, mitochondrial	ECH1	0.00837667	0.516	-1.07	-0.00205562	0.99634	0.998796	stable
Small ribosomal subunit protein uS8	RPS15A	0.00838004	0.516	-1.36	0.729321	0.0226464	0.0735566	stable
Axin interactor, dorsalization-associated protein	AIDA	0.00841393	0.517	1.07	-0.816764	0.0157254	0.0561218	stable
Large ribosomal subunit protein P2	RPLP2	0.00849481	0.52	3.62	0.00915531	0.989143	0.995595	stable
Uncharacterized protein C1orf226	C1orf226	0.00851409	0.52	2.79	1.88403	0.00169835	0.0102154	UP
Arf-GAP with GTPase, ANK repeat and PH domain-containing protein 3	AGAP3	0.00867487	0.525	1.36	0.652821	0.0511731	0.13537	stable
Unconventional myosin-VI	MYO6	0.0086993	0.526	-1.18	0.0347639	0.938385	0.973927	stable
Isocitrate dehydrogenase [NAD] subunit beta, mitochondrial	IDH3B	0.00877611	0.528	1.85	0.692864	0.0132407	0.0495533	stable
F-actin-capping protein subunit alpha-2	CAPZA2	0.00878928	0.529	-1.14	-0.393852	0.292298	0.478746	stable
Small ribosomal subunit protein uS10	RPS20	0.00881996	0.529	-1.37	0.210092	0.623427	0.782442	stable
Laminin subunit beta-1	LAMB1	0.00883485	0.53	-2.02	-0.748291	0.0164744	0.0581314	stable
RNA helicase aquarius	AQR	0.00885003	0.53	2.38	0.155586	0.719459	0.852271	stable
Histone H2A type 2-B	H2AC21	0.0088778	0.531	2.02	NA	NA	NA	NA
Large ribosomal subunit protein eL22	RPL22	0.00892984	0.533	-1.14	0.664787	0.0133297	0.0497473	stable
E3 ubiquitin-protein ligase TRIM21	TRIM21	0.00893873	0.533	-1.09	-2.01158	3.27195e-06	6.95763e-05	DOWN
Elongation factor 2	EEF2	0.00904171	0.536	-1.09	0.37712	0.306534	0.49454	stable
Myosin-10	MYH10	0.00906735	0.536	-1.03	0.184101	0.665988	0.813867	stable
Sterol-4-alpha-carboxylate 3-dehydrogenase, decarboxylating	NSDHL	0.00911635	0.538	1.44	0.953667	0.00908502	0.0372618	stable
BRCA1-associated ATM activator 1	BRAT1	0.00912092	0.538	1.72	0.428218	0.169744	0.326773	stable
Histone H1.5	H1-5	0.00917747	0.539	2.31	NA	NA	NA	NA
Small ribosomal subunit protein eS1	RPS3A	0.009223	0.541	-1.22	0.661734	0.102033	0.225907	stable
Centromere protein V	CENPV	0.00930579	0.543	2.33	3.49406	1.1925e-05	0.000198368	UP
Large ribosomal subunit protein uL5	RPL11	0.00931562	0.543	-1.27	0.905072	0.0095797	0.0388041	stable
Ceramide synthase 6	CERS6	0.00933877	0.544	-1.52	0.158331	0.735656	0.862221	stable
Neurabin-2	PPP1R9B	0.00934375	0.544	-1.14	-1.04246	0.000637493	0.00478667	DOWN
LIM domain and actin-binding protein 1	LIMA1	0.00935274	0.544	-1.1	-1.13267	0.000675063	0.00500436	DOWN
FERM, ARHGEF and pleckstrin domain-containing protein 2	FARP2	0.00937165	0.545	2.52	0.432139	0.327195	0.517708	stable
Sickle tail protein homolog	KIAA1217	0.00937633	0.545	2.02	-0.276878	0.541329	0.717999	stable
Transcriptional regulator ATRX	ATRX	0.00937872	0.545	4.13	0.045737	0.919914	0.966713	stable
Small ribosomal subunit protein mS31	MRPS31	0.00940464	0.545	-1.25	0.133888	0.763236	0.879343	stable
U4/U6 small nuclear ribonucleoprotein Prp31	PRPF31	0.00946245	0.547	2.88	0.380288	0.191864	0.356924	stable
Putative RNA-binding protein 15B	RBM15B	0.00950463	0.548	-2.05	0.0765678	0.925683	0.968764	stable
Stearoyl-CoA desaturase	SCD	0.0095267	0.549	1.75	0.804449	0.110259	0.238993	stable
2',3'-cyclic-nucleotide 3'-phosphodiesterase	CNP	0.00956893	0.55	-1.22	0.774631	0.00277837	0.0149838	stable
Mitogen-activated protein kinase kinase kinase kinase 4	MAP4K4	0.00961959	0.551	1.83	0.332984	0.460208	0.649533	stable
ATP-dependent RNA helicase DDX3Y	DDX3Y	0.00964266	0.551	2.1	0.0526873	0.908035	0.959955	stable
EH domain-containing protein 1	EHD1	0.0097341	0.554	1.31	-0.524865	0.150033	0.299123	stable
F-actin-capping protein subunit beta	CAPZB	0.00979245	0.555	-0.994	-0.404668	0.234145	0.411111	stable
Echinoderm microtubule-associated protein-like 4	EML4	0.00982395	0.556	2.16	0.795701	0.00676742	0.0295638	stable
L-lactate dehydrogenase B chain	LDHB	0.00983017	0.556	-1.19	1.20108	1.50399e-06	3.67894e-05	UP
Galectin-3-binding protein	LGALS3BP	0.00989737	0.558	2.99	-1.18463	0.00372335	0.0187513	DOWN
ATP synthase subunit f, mitochondrial	ATP5MF	0.00990801	0.558	1.59	NA	NA	NA	NA
Ras-related protein Rab-10	RAB10	0.00991641	0.558	-1.14	-0.49477	0.0576424	0.147875	stable
NF-kappa-B-activating protein	NKAP	0.0099579	0.559	-1.05	-0.165611	0.706651	0.842711	stable
Protein kinase C alpha type	PRKCA	0.0100472	0.561	1.63	0.543611	0.162476	0.316377	stable
Translocon-associated protein subunit alpha	SSR1	0.0101751	0.564	-1.04	-0.286021	0.607575	0.770622	stable
Exosome component 10	EXOSC10	0.0102075	0.565	1.91	1.00609	4.05015e-05	0.000547187	UP
D-3-phosphoglycerate dehydrogenase	PHGDH	0.0102178	0.565	-0.988	0.730909	0.0964798	0.216071	stable
Antigen peptide transporter 2	TAP2	0.0102329	0.565	2.15	-0.585746	0.155837	0.307055	stable
Stromal membrane-associated protein 2	SMAP2	0.0102364	0.566	-1.84	0.718545	0.0106253	0.0420343	stable
RNA-binding protein 8A	RBM8A	0.0103108	0.567	3.32	0.592135	0.0344159	0.100269	stable
Succinate--CoA ligase [ADP/GDP-forming] subunit alpha, mitochondrial	SUCLG1	0.0103136	0.567	3.46	0.657049	0.0194242	0.0656067	stable
Histone H1.10	H1-10	0.0103317	0.568	1.03	NA	NA	NA	NA
Aflatoxin B1 aldehyde reductase member 2	AKR7A2	0.0103859	0.569	1.34	0.335428	0.376993	0.570268	stable
Large ribosomal subunit protein eL18	RPL18	0.0104162	0.57	1.11	1.01262	0.0295221	0.0894864	stable
Protein S100-A10	S100A10	0.0104192	0.57	-1.3	-1.83213	0.00101503	0.00683879	DOWN
Glycogen synthase kinase-3 beta	GSK3B	0.010523	0.572	1.43	0.0983366	0.822993	0.914205	stable
Homer protein homolog 3	HOMER3	0.0106259	0.574	2.93	-1.14959	0.000577912	0.0044299	DOWN
Enhancer of rudimentary homolog	ERH	0.0107095	0.576	1.42	0.740853	0.0367744	0.105444	stable
Alpha-centractin	ACTR1A	0.010715	0.576	1.87	-0.870529	0.00137395	0.00862644	stable
Serrate RNA effector molecule homolog	SRRT	0.0107153	0.576	0.983	0.643358	0.0154723	0.0555043	stable
5'-nucleotidase	NT5E	0.0107623	0.577	2.61	-2.81109	2.431e-08	1.19687e-06	DOWN
La-related protein 4B	LARP4B	0.0108397	0.579	1.93	0.035375	0.9365	0.97309	stable
Tropomodulin-2	TMOD2	0.0108914	0.58	-0.966	1.4016	0.00264861	0.0144123	UP
Complement component 1 Q subcomponent-binding protein, mitochondrial	C1QBP	0.0109069	0.58	2.81	1.41612	5.32448e-07	1.56486e-05	UP
Pyruvate kinase PKM	PKM	0.0109418	0.581	-1.12	NA	NA	NA	NA
PHD finger-like domain-containing protein 5A	PHF5A	0.0109564	0.581	1.19	0.837652	0.00793878	0.0334832	stable
RAC-alpha serine/threonine-protein kinase	AKT1	0.010962	0.581	1.85	-0.678355	0.0252141	0.0793601	stable
Nucleoporin NUP35	NUP35	0.0110091	0.582	2.77	0.840476	0.0265552	0.0826838	stable
Glutaminyl-peptide cyclotransferase-like protein	QPCTL	0.0110496	0.583	1.41	1.29104	0.00117681	0.0076352	UP
14-3-3 protein eta	YWHAH	0.011061	0.583	-1.43	-0.587516	0.0759354	0.180888	stable
Glucocorticoid-induced transcript 1 protein	GLCCI1	0.0110736	0.583	-1.61	2.27929	1.55873e-06	3.7893e-05	UP
Ras GTPase-activating protein-binding protein 1	G3BP1	0.0111275	0.584	-1.04	-0.12871	0.793431	0.896044	stable
Ribosomal RNA-processing protein 8	RRP8	0.0111291	0.584	-1.79	-0.0876595	0.842381	0.925515	stable
Zinc finger CCCH-type antiviral protein 1	ZC3HAV1	0.0111401	0.585	1.22	0.783148	0.0609752	0.154304	stable
NADH dehydrogenase [ubiquinone] 1 alpha subcomplex subunit 9, mitochondrial	NDUFA9	0.011204	0.586	3.07	0.448703	0.0989005	0.220427	stable
N-alpha-acetyltransferase 50	NAA50	0.0112802	0.587	1.24	0.295042	0.432822	0.624591	stable
Ribosomal L1 domain-containing protein 1	RSL1D1	0.0113168	0.588	4.16	1.41438	0.000100568	0.00113893	UP
Ferritin heavy chain	FTH1	0.0113241	0.588	2.66	-0.779434	0.030039	0.0906	stable
Ras-related protein Rab-8B	RAB8B	0.0114111	0.59	1.69	0.80639	0.039428	0.110912	stable
Cytochrome c1, heme protein, mitochondrial	CYC1	0.0114167	0.59	2.11	1.21633	6.27365e-05	0.000765522	UP
Clathrin interactor 1	CLINT1	0.0114335	0.59	1.9	-0.732961	0.00742133	0.0317255	stable
Cytospin-B	SPECC1	0.0114762	0.591	-1.13	0.953883	0.0439689	0.120711	stable
Nuclear pore complex protein Nup50	NUP50	0.0115366	0.592	1.44	-0.0508988	0.930493	0.969897	stable
Selenocysteine-specific elongation factor	EEFSEC	0.0116659	0.595	1.91	0.0550107	0.915171	0.963205	stable
Nucleoporin Nup43	NUP43	0.01168	0.595	1.05	0.169211	0.706383	0.842606	stable
Programmed cell death 6-interacting protein	PDCD6IP	0.0116828	0.595	1.31	0.00204685	0.996357	0.998796	stable
Probable non-functional immunoglobulin kappa variable 2D-24	IGKV2D-24	0.0117692	0.597	-2.83	NA	NA	NA	NA
Kinesin-like protein KIF23	KIF23	0.0117928	0.597	1.78	-0.453553	0.129316	0.268324	stable
4'-phosphopantetheine phosphatase	PANK4	0.011809	0.597	1.82	0.745731	0.034301	0.100082	stable
Antigen peptide transporter 1	TAP1	0.0118265	0.598	2.07	-0.789833	0.0438492	0.120467	stable
Structural maintenance of chromosomes protein 3	SMC3	0.0119123	0.599	-3.17	0.729933	0.0803026	0.189033	stable
Beta-2-syntrophin	SNTB2	0.0119251	0.599	0.969	-1.48212	0.000178372	0.00178406	DOWN
Tubulin beta chain	TUBB	0.0120556	0.602	-1.07	0.447208	0.166642	0.322455	stable
Polyadenylate-binding protein 1	PABPC1	0.0120661	0.602	-0.933	0.348422	0.326128	0.516774	stable
Heterogeneous nuclear ribonucleoprotein H	HNRNPH1	0.0120808	0.602	-0.938	0.63234	0.0138229	0.0511157	stable
Carbonyl reductase [NADPH] 3	CBR3	0.0121442	0.603	-1.9	0.445848	0.207189	0.376932	stable
Phosphoenolpyruvate carboxykinase [GTP], mitochondrial	PCK2	0.0121575	0.603	-1.72	-0.646047	0.200856	0.368096	stable
Emerin	EMD	0.0121981	0.604	1.38	0.0281553	0.950526	0.979245	stable
Catenin beta-1	CTNNB1	0.0122317	0.605	-0.94	0.419603	0.209442	0.379845	stable
SUN domain-containing protein 1	SUN1	0.0122613	0.605	1.34	0.322748	0.444252	0.634766	stable
Segment polarity protein dishevelled homolog DVL-3	DVL3	0.0123126	0.606	1.12	0.66593	0.0461564	0.125276	stable
H/ACA ribonucleoprotein complex subunit 2	NHP2	0.0123778	0.607	1.55	0.470993	0.0482935	0.129669	stable
Formin-like protein 2	FMNL2	0.0124788	0.609	-0.951	0.562271	0.148229	0.296628	stable
Nucleoside diphosphate kinase B	NME2	0.0125047	0.609	-0.941	0.575861	0.0278893	0.0856748	stable
Ribosomal protein uL24-like	RPL26L1	0.0125238	0.61	-1.06	-0.12123	0.787474	0.892708	stable
Signal recognition particle receptor subunit alpha	SRPRA	0.0125271	0.61	4.09	NA	NA	NA	NA
UBX domain-containing protein 6	UBXN6	0.0125284	0.61	1.17	-0.678181	0.00943428	0.0383729	stable
Liprin-beta-2	PPFIBP2	0.0125301	0.61	1.39	1.48879	0.0356794	0.103154	stable
Inosine triphosphate pyrophosphatase	ITPA	0.0125926	0.611	-1.45	0.695425	0.019374	0.0654512	stable
Sodium bicarbonate cotransporter 3	SLC4A7	0.0126638	0.612	1.8	0.326332	0.493769	0.677831	stable
Secernin-1	SCRN1	0.0126873	0.612	1.58	-0.550747	0.242388	0.42145	stable
Voltage-dependent anion-selective channel protein 1	VDAC1	0.0127031	0.613	1.65	-0.217867	0.612276	0.774023	stable
Clathrin light chain A	CLTA	0.012705	0.613	1.36	0.288286	0.492786	0.677092	stable
Cleavage and polyadenylation specificity factor subunit 2	CPSF2	0.0127126	0.613	-1.25	-0.0130643	0.980507	0.992369	stable
Coatomer subunit epsilon	COPE	0.012772	0.614	1.38	0.401792	0.289941	0.476321	stable
Fatty acid synthase	FASN	0.0127737	0.614	-0.917	1.54367	1.1229e-07	4.18421e-06	UP
Probable rRNA-processing protein EBP2	EBNA1BP2	0.0127984	0.614	2.2	0.601016	0.0457419	0.124429	stable
AP-3 complex subunit delta-1	AP3D1	0.0128463	0.615	3.02	0.440302	0.251306	0.431526	stable
Phosphoglucomutase-1	PGM1	0.0129531	0.616	0.976	0.564551	0.280595	0.465357	stable
Zinc finger and BTB domain-containing protein 20	ZBTB20	0.0129788	0.617	-0.922	0.983558	0.0136212	0.0505357	stable
Dystonin	DST	0.0129863	0.617	0.974	-0.883426	0.0689782	0.16881	stable
Large ribosomal subunit protein bL9m	MRPL9	0.0130615	0.618	-1.68	1.28739	0.00105919	0.00706109	UP
Pleiotrophin	PTN	0.0130897	0.619	-1.14	2.61476	0.000353436	0.00302756	UP
Far upstream element-binding protein 2	KHSRP	0.0130942	0.619	1.07	0.936994	0.000110826	0.0012256	stable
Tenascin	TNC	0.0131277	0.619	1.07	-0.853048	0.0745241	0.178525	stable
CRACD-like protein	CRACDL	0.0132146	0.62	1.34	NA	NA	NA	NA
Structural maintenance of chromosomes protein 4	SMC4	0.0133422	0.622	1.53	-0.0464028	0.916646	0.964333	stable
Multifunctional procollagen lysine hydroxylase and glycosyltransferase LH3	PLOD3	0.0133966	0.623	1.9	0.688619	0.057502	0.147673	stable
Striatin-4	STRN4	0.0134345	0.624	2.01	0.28526	0.421929	0.613896	stable
Serine/threonine-protein kinase mTOR	MTOR	0.0135067	0.625	2.18	0.573252	0.085052	0.197062	stable
Keratin, type II cytoskeletal 5	KRT5	0.0135878	0.626	-3.67	-1.70467	0.0592098	0.150976	stable
Heat shock protein HSP 90-beta	HSP90AB1	0.0136168	0.626	-0.895	0.648197	0.0141168	0.0519098	stable
Histone H4	H4C1	0.0137156	0.628	2.04	NA	NA	NA	NA
Tropomodulin-3	TMOD3	0.0137225	0.628	-0.904	-1.29004	0.000360345	0.0030717	DOWN
Vinculin	VCL	0.0138153	0.629	-0.949	-3.54658	5.63496e-12	1.08253e-09	DOWN
Poly(rC)-binding protein 1	PCBP1	0.0140033	0.632	-1.05	0.353545	0.254527	0.434829	stable
Replication factor C subunit 2	RFC2	0.0140374	0.632	1.33	0.95419	0.000102608	0.0011576	stable
Peptidyl-prolyl cis-trans isomerase A	PPIA	0.0140937	0.633	-1.01	0.380176	0.233976	0.41094	stable
NAD(+) hydrolase SARM1	SARM1	0.0141293	0.633	2.73	0.937509	0.00503971	0.0236916	stable
(E3-independent) E2 ubiquitin-conjugating enzyme	UBE2O	0.0143607	0.636	-1.07	0.694461	0.0178585	0.0614648	stable
Peptidyl-prolyl cis-trans isomerase FKBP4	FKBP4	0.0143705	0.637	2.53	1.09257	5.62524e-05	0.000704407	UP
Elongation factor G, mitochondrial	GFM1	0.0144129	0.637	1.92	0.393338	0.269406	0.452881	stable
Allograft inflammatory factor 1-like	AIF1L	0.0144554	0.638	3	5.42919	8.52023e-15	9.17714e-12	UP
Collagen alpha-2(IV) chain	COL4A2	0.0144619	0.638	1.68	-0.631331	0.157206	0.309057	stable
Heat shock protein 105 kDa	HSPH1	0.0144948	0.638	0.884	0.593451	0.0882656	0.202071	stable
Elongation factor 1-gamma	EEF1G	0.0145225	0.639	-0.945	0.262484	0.514181	0.695032	stable
Probable ATP-dependent RNA helicase DDX23	DDX23	0.0145575	0.639	2.89	0.147477	0.783219	0.890576	stable
Ras-related protein Rab-1A	RAB1A	0.0145615	0.639	-1	-0.325327	0.375519	0.568913	stable
TRIO and F-actin-binding protein	TRIOBP	0.014702	0.641	1.48	-0.86186	0.0417439	0.115842	stable
Tyrosine-protein phosphatase non-receptor type 23	PTPN23	0.0147031	0.641	-1.11	0.481472	0.152405	0.302258	stable
F-actin-capping protein subunit alpha-1	CAPZA1	0.0148103	0.642	-1.38	-0.496607	0.121928	0.256853	stable
Electrogenic aspartate/glutamate antiporter SLC25A13, mitochondrial	SLC25A13	0.0148485	0.643	1.3	1.85146	1.64708e-08	8.61171e-07	UP
DNA-directed RNA polymerase II subunit RPB2	POLR2B	0.0149264	0.644	2.63	-3.36318	9.89479e-14	4.4535e-11	DOWN
Translocation protein SEC63 homolog	SEC63	0.0149542	0.644	1.95	-0.437138	0.191522	0.356372	stable
BAG family molecular chaperone regulator 2	BAG2	0.0149553	0.644	1.22	-0.979681	0.0208612	0.0691845	stable
Large ribosomal subunit protein eL6	RPL6	0.0149784	0.644	-1.21	0.433615	0.230883	0.407244	stable
Arginine--tRNA ligase, cytoplasmic	RARS1	0.0149871	0.644	1.26	NA	NA	NA	NA
RNA-binding protein 15	RBM15	0.0151066	0.646	2.03	0.345198	0.343386	0.535071	stable
Protein Red	IK	0.0152416	0.647	1.58	-0.275376	0.478543	0.664785	stable
UDP-glucose:glycoprotein glucosyltransferase 1	UGGT1	0.0153547	0.649	1.17	0.0491389	0.923309	0.968092	stable
Ribosomal protein eS27-like	RPS27L	0.0153626	0.649	-0.921	0.441739	0.105693	0.231988	stable
ATP-dependent RNA helicase DDX50	DDX50	0.0154202	0.649	1.78	-0.144594	0.750913	0.871372	stable
Alpha-enolase	ENO1	0.015649	0.652	-0.979	0.269131	0.51063	0.692351	stable
Galectin-1	LGALS1	0.0157102	0.653	-0.916	-1.95861	7.98559e-08	3.14492e-06	DOWN
Thioredoxin-dependent peroxide reductase, mitochondrial	PRDX3	0.0157489	0.653	1.6	0.509871	0.148603	0.297187	stable
Fatty acid-binding protein, brain	FABP7	0.0157804	0.654	-0.937	5.13325	1.54929e-08	8.24974e-07	UP
DNA-directed RNA polymerase II subunit RPB3	POLR2C	0.0158293	0.654	1.98	0.702071	0.0233476	0.0752448	stable
60S ribosome subunit biogenesis protein NIP7 homolog	NIP7	0.01587	0.655	2	0.75568	0.0270708	0.0838141	stable
Rho-associated protein kinase 2	ROCK2	0.0159447	0.655	0.935	0.216122	0.689647	0.830714	stable
Chromobox protein homolog 3	CBX3	0.0159985	0.656	1.4	1.4451	2.37968e-07	7.87545e-06	UP
Pleckstrin homology domain-containing family A member 4	PLEKHA4	0.0160189	0.656	2.6	0.453787	0.281251	0.465932	stable
Extended synaptotagmin-1	ESYT1	0.0160377	0.656	0.853	-0.438439	0.255213	0.435719	stable
Importin-5	IPO5	0.0160804	0.657	0.894	0.00994473	0.984634	0.993702	stable
Chromobox protein homolog 5	CBX5	0.016115	0.657	1.58	0.344227	0.325966	0.516698	stable
Rabphilin-3A	RPH3A	0.0161644	0.658	1.33	NA	NA	NA	NA
Transcription factor A, mitochondrial	TFAM	0.0162248	0.658	2.77	0.286326	0.472259	0.65953	stable
Uncharacterized protein C19orf47	C19orf47	0.0162625	0.659	-1.26	-0.0957272	0.82778	0.917076	stable
Protein FAM91A1	FAM91A1	0.0162711	0.659	1.88	-0.118561	0.818305	0.910691	stable
26S proteasome non-ATPase regulatory subunit 12	PSMD12	0.016279	0.659	1.77	-0.181276	0.678825	0.822326	stable
Eukaryotic translation initiation factor 2 subunit 1	EIF2S1	0.0163647	0.66	0.851	-0.00117867	0.998478	0.99962	stable
NTF2-related export protein 1	NXT1	0.0163826	0.66	2.02	0.132799	0.760346	0.877939	stable
Ataxin-10	ATXN10	0.0164419	0.661	0.869	0.578166	0.00749944	0.0320072	stable
Chromatin target of PRMT1 protein	CHTOP	0.0164746	0.661	3.5	0.807906	0.00841269	0.0350771	stable
Guanine nucleotide-binding protein G(o) subunit alpha	GNAO1	0.0165443	0.662	0.918	1.83028	0.0108618	0.0427351	UP
Heterogeneous nuclear ribonucleoprotein H3	HNRNPH3	0.0165646	0.662	-0.843	0.419532	0.226565	0.401517	stable
Small ribosomal subunit protein eS27	RPS27	0.0166439	0.663	-0.902	1.1338	0.00130064	0.00826837	UP
Actin-related protein 2/3 complex subunit 5	ARPC5	0.0166625	0.663	1.24	-0.9498	0.00299241	0.0158215	stable
Lipid droplet-regulating VLDL assembly factor AUP1	AUP1	0.0167439	0.664	1.2	0.82244	0.0309183	0.092473	stable
Neuroguidin	NGDN	0.0168646	0.665	-0.843	0.223087	0.613412	0.774844	stable
Unconventional myosin-XVIIIa	MYO18A	0.0168994	0.665	-0.855	-0.187219	0.668002	0.814539	stable
DnaJ homolog subfamily A member 1	DNAJA1	0.0169071	0.665	-0.894	0.391294	0.277785	0.461926	stable
5'-AMP-activated protein kinase subunit gamma-1	PRKAG1	0.0169728	0.666	1.72	-0.0145367	0.975827	0.990355	stable
Filamin-A	FLNA	0.0169863	0.666	-0.835	-1.38799	2.93887e-05	0.000422795	DOWN
Large ribosomal subunit protein uL13	RPL13A	0.016995	0.666	0.918	0.353604	0.338669	0.530428	stable
Ubiquitin carboxyl-terminal hydrolase 10	USP10	0.0170689	0.667	3.31	0.0750073	0.869301	0.940837	stable
Non-POU domain-containing octamer-binding protein	NONO	0.0171361	0.668	-0.968	0.354508	0.287614	0.473803	stable
Bone morphogenetic protein 1	BMP1	0.0171549	0.668	1.47	-0.758796	0.0380062	0.107987	stable
Inorganic pyrophosphatase 2, mitochondrial	PPA2	0.017194	0.668	-1.71	-0.318291	0.345127	0.536508	stable
Vacuolar protein sorting-associated protein 11 homolog	VPS11	0.0172669	0.669	-1.04	0.173749	0.711607	0.846481	stable
tRNA (34-2'-O)-methyltransferase regulator WDR6	WDR6	0.017302	0.669	-1.18	0.233234	0.577566	0.747793	stable
Procollagen galactosyltransferase 1	COLGALT1	0.0173305	0.67	0.961	NA	NA	NA	NA
Peroxisomal 2,4-dienoyl-CoA reductase [(3E)-enoyl-CoA-producing]	DECR2	0.0173434	0.67	1.31	-0.222769	0.590822	0.75872	stable
Mitotic deacetylase-associated SANT domain protein	MIDEAS	0.0173691	0.67	-1.37	NA	NA	NA	NA
Signal-induced proliferation-associated 1-like protein 3	SIPA1L3	0.0174399	0.671	-0.864	-0.166178	0.765755	0.88057	stable
Refilin-B	RFLNB	0.0174897	0.671	1.62	NA	NA	NA	NA
Histone deacetylase complex subunit SAP18	SAP18	0.0176129	0.672	1.03	-0.308393	0.391321	0.583536	stable
Vacuolar protein sorting-associated protein 52 homolog	VPS52	0.017711	0.673	-1.36	0.268696	0.514032	0.694948	stable
Catalase	CAT	0.0177235	0.673	-1.1	-0.150872	0.72729	0.857396	stable
Peroxisomal acyl-coenzyme A oxidase 1	ACOX1	0.0178152	0.674	-0.824	0.0622429	0.88882	0.95066	stable
Prolyl 4-hydroxylase subunit alpha-1	P4HA1	0.0178727	0.675	-0.956	-0.469961	0.288463	0.474387	stable
Succinate dehydrogenase [ubiquinone] flavoprotein subunit, mitochondrial	SDHA	0.0179516	0.675	3.03	0.195208	0.662482	0.811073	stable
PH-interacting protein	PHIP	0.0179718	0.675	2.67	0.802167	0.0409942	0.114304	stable
Myeloid leukemia factor 2	MLF2	0.0179833	0.676	1.49	0.0858195	0.850937	0.930502	stable
Histone H3.2	H3C15	0.0180317	0.676	1.38	NA	NA	NA	NA
Epithelial discoidin domain-containing receptor 1	DDR1	0.0180768	0.676	1.33	0.2495	0.655619	0.805928	stable
Diacylglycerol kinase zeta	DGKZ	0.0181374	0.677	0.914	0.323794	0.482235	0.667427	stable
5'-3' exoribonuclease 2	XRN2	0.0181689	0.677	-0.989	0.377779	0.264902	0.447165	stable
PDZ domain-containing protein GIPC1	GIPC1	0.0181803	0.677	-2.34	0.0725735	0.892357	0.952176	stable
Large ribosomal subunit protein eL33	RPL35A	0.0182257	0.678	-0.826	0.544488	0.108833	0.236769	stable
ADP-ribosylation factor 4	ARF4	0.0182271	0.678	-0.93	-0.664452	0.0603067	0.153055	stable
Aladin	AAAS	0.0182302	0.678	1.48	0.918605	0.000294418	0.00263971	stable
Lethal(2) giant larvae protein homolog 1	LLGL1	0.0182578	0.678	-0.829	-1.08706	8.76292e-07	2.3597e-05	DOWN
ADP-ribosylation factor 5	ARF5	0.0183168	0.678	-0.849	-0.425337	0.265031	0.447197	stable
Ubiquitin-conjugating enzyme E2 D3	UBE2D3	0.0183906	0.679	1.51	-0.383057	0.239823	0.418468	stable
Signal-induced proliferation-associated protein 1	SIPA1	0.0184672	0.68	-1.13	-0.472428	0.149771	0.298764	stable
SWI/SNF-related matrix-associated actin-dependent regulator of chromatin subfamily A member 5	SMARCA5	0.0184756	0.68	2.87	0.603981	0.0182529	0.0624946	stable
Tumor susceptibility gene 101 protein	TSG101	0.018589	0.681	2.16	-0.647803	0.0137262	0.0508536	stable
Nuclear pore complex protein Nup205	NUP205	0.018592	0.681	2.25	0.602506	0.0630236	0.158116	stable
Splicing regulator ARVCF	ARVCF	0.0186116	0.681	2.15	1.23127	0.0100489	0.0402083	UP
Aconitate hydratase, mitochondrial	ACO2	0.0186182	0.681	2.37	0.751327	0.000624807	0.00471162	stable
Centrosomal protein of 131 kDa	CEP131	0.0186558	0.681	4.4	NA	NA	NA	NA
Hsp90 co-chaperone Cdc37	CDC37	0.0186765	0.682	2.38	-0.174314	0.711068	0.846107	stable
Rho GTPase-activating protein 1	ARHGAP1	0.0187203	0.682	2.66	-1.14646	0.000304597	0.00271244	DOWN
Transmembrane emp24 domain-containing protein 9	TMED9	0.0188051	0.683	1.06	-0.700056	0.00656758	0.0288589	stable
C-terminal-binding protein 1	CTBP1	0.0188963	0.683	1.87	-0.104409	0.868948	0.940684	stable
Death domain-associated protein 6	DAXX	0.0189014	0.683	2.01	0.58046	0.26698	0.449618	stable
Serine/arginine-rich splicing factor 3	SRSF3	0.0189085	0.683	-0.827	0.369034	0.267781	0.450637	stable
AP-2 complex subunit alpha-2	AP2A2	0.0189288	0.684	0.917	-0.515714	0.0668642	0.164657	stable
E3 ubiquitin-protein ligase HERC2	HERC2	0.0190325	0.684	2.72	0.362367	0.359834	0.552105	stable
Dynein light chain 1, cytoplasmic	DYNLL1	0.0190439	0.685	3.27	-0.00627657	0.99385	0.997841	stable
Arf-GAP with coiled-coil, ANK repeat and PH domain-containing protein 1	ACAP1	0.0190682	0.685	1.15	-1.21004	0.000704324	0.00517019	DOWN
Adenylate kinase isoenzyme 1	AK1	0.0192568	0.686	3.2	-0.0849702	0.869355	0.940837	stable
Cell division cycle protein 23 homolog	CDC23	0.0192635	0.686	-0.9	0.267933	0.486522	0.67159	stable
Formin-like protein 3	FMNL3	0.0192917	0.687	1.69	-0.454605	0.281736	0.466606	stable
[F-actin]-monooxygenase MICAL1	MICAL1	0.0193119	0.687	0.928	-0.192864	0.650044	0.801828	stable
Cytochrome b-245 chaperone 1	CYBC1	0.0193288	0.687	1.22	NA	NA	NA	NA
Protein LSM14 homolog B	LSM14B	0.0194081	0.687	-0.98	0.47332	0.0887902	0.202888	stable
Plexin-B2	PLXNB2	0.0194173	0.688	-1.99	-0.40828	0.249018	0.429141	stable
Splicing factor 3B subunit 1	SF3B1	0.0194309	0.688	-0.849	0.736134	0.000748933	0.00544897	stable
Cleavage and polyadenylation specificity factor subunit 7	CPSF7	0.0194645	0.688	1.29	0.311551	0.378307	0.571542	stable
Serpin B6	SERPINB6	0.019525	0.688	1.18	-2.63229	8.58786e-05	0.000996204	DOWN
DNA polymerase delta catalytic subunit	POLD1	0.0197876	0.69	2.25	1.16512	0.00113113	0.00742514	UP
BUB3-interacting and GLEBS motif-containing protein ZNF207	ZNF207	0.0197905	0.69	1.77	0.177131	0.709272	0.844979	stable
Eukaryotic translation initiation factor 3 subunit H	EIF3H	0.0199885	0.692	2.82	0.575518	0.01161	0.0450919	stable
E3 ubiquitin-protein ligase UBR4	UBR4	0.020036	0.692	-0.899	-0.0911639	0.866713	0.939148	stable
Coatomer subunit beta	COPB1	0.0200509	0.692	0.972	-1.00821	0.000285116	0.00256653	DOWN
Protein sprouty homolog 4	SPRY4	0.0200875	0.693	1.44	1.59618	0.0066901	0.0292992	UP
T-complex protein 1 subunit gamma	CCT3	0.0202241	0.694	-0.897	0.963345	0.000271119	0.00246732	stable
Tudor-interacting repair regulator protein	NUDT16L1	0.020248	0.694	0.987	0.376033	0.214684	0.386725	stable
Dedicator of cytokinesis protein 7	DOCK7	0.0202482	0.694	-0.924	-0.682517	0.062373	0.156904	stable
Histone acetyltransferase type B catalytic subunit	HAT1	0.0202701	0.694	2.41	0.204281	0.628181	0.785384	stable
Inositol 1,4,5-trisphosphate receptor type 3	ITPR3	0.0202846	0.694	-0.997	-1.30716	0.0623898	0.156904	stable
Ubiquitin-like protein ISG15	ISG15	0.0203402	0.694	-0.804	-1.18139	0.00130124	0.00826881	DOWN
1-phosphatidylinositol 4,5-bisphosphate phosphodiesterase gamma-1	PLCG1	0.0204058	0.695	2.78	0.925291	0.0010986	0.00726238	stable
Ribosome-binding protein 1	RRBP1	0.0204106	0.695	1.99	-0.943903	0.0460091	0.124962	stable
Lysine-specific histone demethylase 1A	KDM1A	0.0204134	0.695	2.31	1.40663	1.18523e-05	0.000197367	UP
FACT complex subunit SSRP1	SSRP1	0.0204322	0.695	-0.817	0.679167	0.0049478	0.0233711	stable
Transcriptional repressor p66-alpha	GATAD2A	0.0204726	0.695	4.04	0.286406	0.456707	0.646406	stable
GTP-binding protein 4	GTPBP4	0.02051	0.696	3.14	0.50767	0.210614	0.381328	stable
Protein phosphatase 1 regulatory subunit 12C	PPP1R12C	0.0206271	0.697	1.18	-0.0202244	0.966162	0.985366	stable
Peptidyl-prolyl cis-trans isomerase FKBP8	FKBP8	0.0207205	0.697	0.795	-0.472282	0.0891893	0.203505	stable
BTB/POZ domain-containing adapter for CUL3-mediated RhoA degradation protein 3	KCTD10	0.020793	0.698	1.2	-1.14938	0.000422371	0.00347958	DOWN
DNA (cytosine-5)-methyltransferase 1	DNMT1	0.0210307	0.699	2.37	0.889911	9.56308e-05	0.00109086	stable
MMS19 nucleotide excision repair protein homolog	MMS19	0.0210805	0.7	1.48	0.755634	0.118999	0.252725	stable
Dihydrolipoyllysine-residue succinyltransferase component of 2-oxoglutarate dehydrogenase complex, mitochondrial	DLST	0.0211025	0.7	1.15	0.231073	0.573929	0.744943	stable
Dihydropyrimidinase-related protein 1	CRMP1	0.0213793	0.702	1.56	2.3148	0.00650609	0.0286278	UP
Telomerase RNA component interacting RNase	TRIR	0.0214283	0.702	2.01	NA	NA	NA	NA
Ran GTPase-activating protein 1	RANGAP1	0.0214571	0.702	1.91	0.110805	0.805798	0.903211	stable
Cytoskeleton-associated protein 5	CKAP5	0.0214768	0.702	-0.792	0.215142	0.606197	0.769494	stable
Dihydrofolate reductase	DHFR	0.0215017	0.702	-1.31	0.680838	0.00497413	0.0234603	stable
Acyl-CoA (8-3)-desaturase	FADS1	0.0215292	0.703	1.02	0.150575	0.798846	0.898928	stable
Trifunctional enzyme subunit alpha, mitochondrial	HADHA	0.0216102	0.703	0.834	0.786903	0.00536993	0.0248436	stable
Sphingosine-1-phosphate lyase 1	SGPL1	0.0218432	0.705	1.85	-0.862084	0.0260756	0.0815666	stable
Tubulin beta-3 chain	TUBB3	0.0218472	0.705	-0.917	0.372278	0.381523	0.574451	stable
CAD protein	CAD	0.0218706	0.705	-0.79	0.269596	0.496436	0.679795	stable
AP-2 complex subunit alpha-1	AP2A1	0.0219439	0.705	-1.03	-0.5664	0.0371549	0.106245	stable
Protein FAM98B	FAM98B	0.0219628	0.705	2.75	0.401163	0.316498	0.506274	stable
Large ribosomal subunit protein eL27	RPL27	0.0221264	0.706	-0.822	0.16303	0.723037	0.854399	stable
Rho GTPase-activating protein 35	ARHGAP35	0.0222548	0.707	2.08	0.262243	0.558024	0.731936	stable
Threonine--tRNA ligase 1, cytoplasmic	TARS1	0.0222994	0.708	2.11	NA	NA	NA	NA
Nuclear pore complex protein Nup107	NUP107	0.0223242	0.708	2.35	0.720595	0.00296598	0.0157132	stable
Cyclin-dependent kinase 4	CDK4	0.0223673	0.708	0.85	1.0801	5.30981e-05	0.000672932	UP
Solute carrier family 12 member 2	SLC12A2	0.0223681	0.708	1.4	-0.0127725	0.977134	0.99097	stable
Aurora kinase B	AURKB	0.0225928	0.709	2.04	0.693109	0.0213069	0.0702929	stable
Leucine-rich repeat-containing protein 59	LRRC59	0.0226266	0.71	-0.772	-0.103153	0.853812	0.931796	stable
Ubiquitin carboxyl-terminal hydrolase 5	USP5	0.0226895	0.71	0.818	0.420758	0.157271	0.309107	stable
Protein transport protein Sec23B	SEC23B	0.0227175	0.71	1.84	0.233847	0.568785	0.741175	stable
Protein phosphatase 1 regulatory subunit 12A	PPP1R12A	0.0227302	0.71	-0.759	-0.125877	0.789023	0.893886	stable
Disco-interacting protein 2 homolog B	DIP2B	0.0227574	0.71	2.29	1.21169	0.000187286	0.0018451	UP
Barrier-to-autointegration factor	BANF1	0.0230221	0.712	3.74	0.223076	0.592032	0.759485	stable
Alpha-adducin	ADD1	0.0230377	0.712	1.89	-0.641148	0.0314471	0.0935751	stable
Lamin-B1	LMNB1	0.0230799	0.712	0.786	1.5611	3.79641e-05	0.000520042	UP
Small ribosomal subunit protein uS5	RPS2	0.0232084	0.713	1.01	1.17083	3.40593e-05	0.000475652	UP
Inactive tyrosine-protein kinase 7	PTK7	0.0232922	0.713	0.774	0.330861	0.426884	0.618965	stable
Ras-related protein Rab-5C	RAB5C	0.0233362	0.714	-0.781	0.151404	0.731511	0.859542	stable
Zinc finger CCCH domain-containing protein 11A	ZC3H11A	0.0233648	0.714	1.14	-0.0765329	0.874827	0.943397	stable
Serine/threonine-protein kinase 4	STK4	0.023521	0.715	0.845	-0.603456	0.094162	0.212261	stable
Replication protein A 32 kDa subunit	RPA2	0.0235365	0.715	0.936	0.721321	0.00203023	0.0117538	stable
Splicing factor, proline- and glutamine-rich	SFPQ	0.0235681	0.715	-1.03	1.04514	0.00178288	0.0105864	UP
Galactokinase	GALK1	0.023587	0.715	0.808	-0.769728	0.031512	0.0937504	stable
Serine/threonine-protein kinase MRCK alpha	CDC42BPA	0.0235925	0.715	1.34	-1.08867	0.000608229	0.00461311	DOWN
Zinc finger protein 384	ZNF384	0.0236212	0.715	1.58	0.498322	0.0989933	0.22054	stable
Protein Shroom2	SHROOM2	0.0236924	0.716	2.95	-1.5118	0.0457675	0.124435	stable
Large ribosomal subunit protein eL29	RPL29	0.0237869	0.716	1.18	0.697083	0.0386726	0.109315	stable
Dystrobrevin beta	DTNB	0.0238632	0.717	1.82	0.968471	0.053795	0.140234	stable
ATP-citrate synthase	ACLY	0.0239806	0.717	-0.893	0.101807	0.81792	0.910691	stable
Phostensin	PPP1R18	0.0239911	0.717	-0.78	-2.20451	2.31968e-06	5.30361e-05	DOWN
Rho GTPase-activating protein 21	ARHGAP21	0.0241025	0.718	0.969	-0.148413	0.732747	0.860196	stable
Flotillin-1	FLOT1	0.0242732	0.719	0.748	-1.28443	0.000402065	0.00333834	DOWN
26S proteasome non-ATPase regulatory subunit 7	PSMD7	0.0243473	0.719	-0.809	0.728794	0.0239853	0.076486	stable
Serine/threonine-protein phosphatase PGAM5, mitochondrial	PGAM5	0.0243534	0.719	-0.743	0.273735	0.520383	0.700188	stable
Rho-associated protein kinase 1	ROCK1	0.0245268	0.72	-0.797	-0.703988	0.0347926	0.101179	stable
Moesin	MSN	0.0246294	0.721	-0.773	-1.26193	0.000143471	0.00149974	DOWN
Enoyl-CoA delta isomerase 2	ECI2	0.0248431	0.722	3.13	0.181271	0.694308	0.833774	stable
Transgelin-3	TAGLN3	0.0249199	0.722	2.68	1.35453	0.0774505	0.18383	stable
Receptor-type tyrosine-protein phosphatase alpha	PTPRA	0.0249276	0.722	1.29	0.263185	0.576967	0.747324	stable
Eukaryotic translation initiation factor 4B	EIF4B	0.0249363	0.722	-0.735	0.0504054	0.909675	0.960786	stable
Heat shock 70 kDa protein 4	HSPA4	0.0249861	0.723	-1.36	0.31076	0.420473	0.612852	stable
14-3-3 protein theta	YWHAQ	0.0250018	0.723	-0.981	0.0112732	0.981095	0.992738	stable
Importin subunit alpha-7	KPNA6	0.0250564	0.723	0.894	0.0387681	0.935182	0.972557	stable
Probable E3 ubiquitin-protein ligase DTX3	DTX3	0.0250876	0.723	-1.54	-0.508009	0.279719	0.464322	stable
Clathrin heavy chain 1	CLTC	0.0251095	0.723	-0.765	-0.310659	0.37687	0.570219	stable
Dehydrogenase/reductase SDR family member 4	DHRS4	0.0251261	0.723	-1.16	-0.622293	0.0969861	0.216958	stable
Lamina-associated polypeptide 2, isoforms beta/gamma	TMPO	0.0251822	0.724	0.768	0.370203	0.281091	0.465765	stable
Creatine kinase B-type	CKB	0.0255747	0.726	-0.731	2.80285	3.81906e-06	7.8628e-05	UP
Probable ATP-dependent RNA helicase DDX5	DDX5	0.0256453	0.726	-0.733	0.0562847	0.956877	0.981901	stable
Protein SEC13 homolog	SEC13	0.0256948	0.726	3.08	-0.724045	0.09248	0.209526	stable
ADP-ribosylation factor-like protein 8B	ARL8B	0.0258763	0.727	0.786	-0.282203	0.445366	0.635494	stable
Gem-associated protein 5	GEMIN5	0.0260925	0.728	1.87	0.352378	0.373138	0.566487	stable
Large ribosomal subunit protein eL34	RPL34	0.0262281	0.729	0.86	-0.0636165	0.889639	0.950877	stable
Constitutive coactivator of PPAR-gamma-like protein 2	FAM120C	0.0262601	0.729	2.34	1.27945	0.0126659	0.0478574	UP
DNA topoisomerase 1	TOP1	0.0263317	0.729	0.952	1.09418	7.99822e-05	0.000940268	UP
Long-chain fatty acid transport protein 3	SLC27A3	0.0265237	0.73	1.28	-0.0173588	0.977646	0.991145	stable
Asparagine--tRNA ligase, cytoplasmic	NARS1	0.02654	0.73	1.49	NA	NA	NA	NA
Probable dimethyladenosine transferase	DIMT1	0.0265717	0.73	1.46	-0.0462305	0.941864	0.975489	stable
Transmembrane emp24 domain-containing protein 2	TMED2	0.0266267	0.731	2.03	-0.0569733	0.910158	0.960869	stable
Pre-mRNA-processing factor 40 homolog A	PRPF40A	0.0268986	0.732	1.03	0.774083	0.0453959	0.123712	stable
Galactosylgalactosylxylosylprotein 3-beta-glucuronosyltransferase 3	B3GAT3	0.026942	0.732	0.791	0.18559	0.672017	0.817097	stable
ATP-dependent RNA helicase DDX3X	DDX3X	0.0269485	0.732	-0.743	0.137092	0.799843	0.899609	stable
Switch-associated protein 70	SWAP70	0.0271091	0.733	-0.832	-1.36247	0.000372051	0.00315612	DOWN
ATP synthase subunit alpha, mitochondrial	ATP5F1A	0.027136	0.733	-0.834	NA	NA	NA	NA
Adenosylhomocysteinase	AHCY	0.0272447	0.733	-0.735	1.33713	9.61469e-07	2.56712e-05	UP
WD repeat-containing protein 43	WDR43	0.0272691	0.733	2.01	0.509547	0.0497764	0.132521	stable
Apoptosis-stimulating of p53 protein 2	TP53BP2	0.0273365	0.734	2.8	0.31174	0.419205	0.611708	stable
Receptor-type tyrosine-protein phosphatase zeta	PTPRZ1	0.0275266	0.735	-0.719	7.24713	9.73066e-18	7.66435e-14	UP
Small ribosomal subunit protein eS28	RPS28	0.0275943	0.735	1.09	0.717503	0.0178256	0.0613785	stable
Cytospin-A	SPECC1L	0.0276084	0.735	-0.803	-1.05359	0.000479964	0.00382442	DOWN
Ran-specific GTPase-activating protein	RANBP1	0.0277114	0.735	0.833	1.61891	4.32205e-06	8.69544e-05	UP
Cytochrome b5 type B	CYB5B	0.0278176	0.736	1.81	0.717579	0.0097207	0.0392239	stable
Dehydrogenase/reductase SDR family member 7	DHRS7	0.0278814	0.736	-0.738	-0.869814	0.0194917	0.0657783	stable
AP-2 complex subunit beta	AP2B1	0.0280224	0.737	-0.761	0.223763	0.602269	0.766732	stable
Nuclear envelope pore membrane protein POM 121C	POM121C	0.0280536	0.737	2.82	0.389869	0.259622	0.440904	stable
ADP-ribosylation factor 3	ARF3	0.0280558	0.737	1.76	0.181655	0.700808	0.838552	stable
Cell cycle and apoptosis regulator protein 2	CCAR2	0.028111	0.737	2.35	NA	NA	NA	NA
U5 small nuclear ribonucleoprotein 200 kDa helicase	SNRNP200	0.0281129	0.737	0.77	0.676429	0.00221973	0.0125771	stable
Myosin light chain kinase, smooth muscle	MYLK	0.028166	0.737	1.14	-3.51411	7.00794e-07	1.96434e-05	DOWN
Profilin-1	PFN1	0.0281958	0.737	-0.999	-0.35472	0.364089	0.556736	stable
Transcriptional coactivator YAP1	YAP1	0.0282916	0.738	1.49	-1.51164	0.00023765	0.00222972	DOWN
CTP synthase 2	CTPS2	0.0283453	0.738	-1.38	0.49628	0.189096	0.352817	stable
Cytoskeleton-associated protein 2	CKAP2	0.0283595	0.738	1.44	0.0350745	0.94058	0.974993	stable
CCHC-type zinc finger nucleic acid binding protein	CNBP	0.0283835	0.738	2.25	0.388361	0.207373	0.377049	stable
Large ribosomal subunit protein bL28m	MRPL28	0.0286129	0.739	-1.19	0.297668	0.418315	0.610951	stable
Rho GTPase-activating protein 17	ARHGAP17	0.0287106	0.739	-2.46	-0.607087	0.0168085	0.0588802	stable
Elongation factor Ts, mitochondrial	TSFM	0.0287455	0.74	2.88	0.432428	0.30309	0.490757	stable
Tapasin	TAPBP	0.0288234	0.74	3.01	-1.38599	0.000228478	0.00216299	DOWN
Arf-GAP with coiled-coil, ANK repeat and PH domain-containing protein 2	ACAP2	0.0288436	0.74	-1.15	0.206566	0.636007	0.790891	stable
Keratin, type I cytoskeletal 17	KRT17	0.0288648	0.74	-4.71	-3.14467	2.67541e-05	0.000388799	DOWN
Histone-lysine N-methyltransferase SMYD3	SMYD3	0.0289038	0.74	-1.62	0.0183605	0.967036	0.986052	stable
Nurim	NRM	0.0290725	0.741	0.931	0.821959	0.0563651	0.145298	stable
DNA replication licensing factor MCM4	MCM4	0.0292566	0.742	-0.708	0.765152	0.018679	0.0636356	stable
Pre-mRNA-splicing factor SYF2	SYF2	0.0293026	0.742	-1.64	0.390249	0.33772	0.52968	stable
Cullin-4A	CUL4A	0.0293032	0.742	0.837	-0.102625	0.828595	0.917275	stable
RNA cytosine C(5)-methyltransferase NSUN2	NSUN2	0.029502	0.743	0.794	0.519286	0.130435	0.270056	stable
T-complex protein 1 subunit alpha	TCP1	0.0296666	0.743	-1.12	0.680938	0.0418644	0.116107	stable
Retrotransposon Gag-like protein 8C	RTL8C	0.0297094	0.743	-0.909	NA	NA	NA	NA
Keratin, type I cytoskeletal 14	KRT14	0.0298983	0.744	-2.7	-3.33037	0.00126704	0.00809721	DOWN
Electron transfer flavoprotein subunit alpha, mitochondrial	ETFA	0.0300445	0.745	2.84	0.206496	0.66088	0.809868	stable
Protein regulator of cytokinesis 1	PRC1	0.0300645	0.745	2.77	0.0612622	0.892277	0.952176	stable
Ubiquitin/ISG15-conjugating enzyme E2 L6	UBE2L6	0.0301388	0.745	-1.41	-1.34855	0.0235366	0.0755292	stable
U2 small nuclear ribonucleoprotein A'	SNRPA1	0.0302459	0.745	2.03	0.931742	0.00721253	0.0310265	stable
Polyadenylate-binding protein 4	PABPC4	0.0302951	0.746	-0.737	-0.0773673	0.876092	0.943951	stable
Spliceosome RNA helicase DDX39B	DDX39B	0.0303136	0.746	0.799	0.674353	0.0400446	0.112166	stable
Eukaryotic translation initiation factor 3 subunit B	EIF3B	0.0303623	0.746	-0.69	0.757687	0.00106155	0.00706785	stable
Ribosome quality control complex subunit TCF25	TCF25	0.0306053	0.747	0.895	0.264888	0.496026	0.679698	stable
UBX domain-containing protein 1	UBXN1	0.0306175	0.747	2.29	0.244881	0.545905	0.721722	stable
Lysophosphatidylserine lipase ABHD12	ABHD12	0.0307152	0.747	1.97	0.445693	0.259239	0.440444	stable
Hornerin	HRNR	0.0310194	0.748	-4.15	NA	NA	NA	NA
Ubiquitin-associated and SH3 domain-containing protein B	UBASH3B	0.0314885	0.75	1.12	-1.6357	0.0397746	0.111648	stable
RNA-binding protein 4	RBM4	0.0316128	0.75	0.73	0.134803	0.759329	0.87728	stable
EF-hand domain-containing protein D2	EFHD2	0.0317191	0.751	-0.975	-0.425895	0.241805	0.420854	stable
Eukaryotic initiation factor 4A-I	EIF4A1	0.0317309	0.751	-0.677	0.589969	0.0625142	0.157063	stable
Laminin subunit gamma-1	LAMC1	0.0317698	0.751	0.814	0.562129	0.120565	0.255002	stable
Mitochondrial adenyl nucleotide antiporter SLC25A24	SLC25A24	0.0319785	0.751	-1.34	-1.1596	0.00437703	0.0212944	DOWN
Programmed cell death protein 2-like	PDCD2L	0.0320426	0.752	1.22	0.0162821	0.971402	0.988148	stable
Integrin-linked protein kinase	ILK	0.0320707	0.752	1.59	-0.836435	0.0050304	0.0236761	stable
Keratin, type II cytoskeletal 2 epidermal	KRT2	0.0321502	0.752	-3.69	NA	NA	NA	NA
Leucine zipper putative tumor suppressor 3	LZTS3	0.0322569	0.752	-0.765	NA	NA	NA	NA
MAP7 domain-containing protein 3	MAP7D3	0.0322919	0.752	2.68	-0.277399	0.477363	0.663716	stable
THO complex subunit 5 homolog	THOC5	0.0323216	0.753	2	0.0297816	0.95571	0.981611	stable
Spindle and centriole-associated protein 1	SPICE1	0.0324198	0.753	2.34	0.557288	0.161678	0.315289	stable
Aspartate--tRNA ligase, cytoplasmic	DARS1	0.0325995	0.753	-0.674	NA	NA	NA	NA
Laminin subunit beta-2	LAMB2	0.0326068	0.754	1.94	-0.30105	0.472914	0.659933	stable
ATP-binding cassette sub-family F member 2	ABCF2	0.0326416	0.754	0.774	-0.263461	0.512804	0.694004	stable
ADP/ATP translocase 2	SLC25A5	0.0328015	0.754	-0.683	0.0268064	0.960434	0.982896	stable
Peptidyl-prolyl cis-trans isomerase G	PPIG	0.0328168	0.754	1.6	0.917938	0.00620846	0.0276746	stable
Thioredoxin domain-containing protein 5	TXNDC5	0.0329062	0.754	1.55	-0.316129	0.381938	0.574483	stable
Inosine-5'-monophosphate dehydrogenase 1	IMPDH1	0.032992	0.755	0.878	0.395407	0.378551	0.571801	stable
Extended synaptotagmin-2	ESYT2	0.0329927	0.755	2.69	-1.45704	5.87279e-05	0.000728457	DOWN
Protein THEM6	THEM6	0.0330018	0.755	-1	NA	NA	NA	NA
Phosphatidylinositol 4-phosphate 5-kinase type-1 alpha	PIP5K1A	0.0331712	0.755	0.993	0.492957	0.171799	0.329842	stable
Ras-related C3 botulinum toxin substrate 1	RAC1	0.0332365	0.756	-0.666	-0.0836321	0.857848	0.934363	stable
EMILIN-1	EMILIN1	0.0334438	0.756	2.17	-0.909131	0.267105	0.449733	stable
Alpha-ketoglutarate-dependent dioxygenase FTO	FTO	0.0335798	0.757	1.12	-0.205596	0.629765	0.785891	stable
Outer dense fiber protein 2	ODF2	0.0336229	0.757	1.56	0.30155	0.46602	0.654181	stable
RNA-binding protein 25	RBM25	0.0336279	0.757	1.8	0.926989	0.0329493	0.0969099	stable
Unconventional myosin-Vb	MYO5B	0.0338333	0.757	-0.876	NA	NA	NA	NA
Exportin-T	XPOT	0.0340239	0.758	1.64	0.0167379	0.984727	0.993702	stable
Protein NipSnap homolog 1	NIPSNAP1	0.0340546	0.758	2.29	1.16774	1.36936e-05	0.000222158	UP
Serine/threonine-protein kinase MARK2	MARK2	0.0341157	0.758	0.821	0.198929	0.655883	0.806041	stable
Calcium homeostasis endoplasmic reticulum protein	CHERP	0.0341825	0.758	2.32	0.658213	0.0232361	0.074977	stable
Calcyclin-binding protein	CACYBP	0.0342225	0.759	1.59	1.14118	1.2812e-07	4.66374e-06	UP
Leucine--tRNA ligase, cytoplasmic	LARS1	0.0342366	0.759	-1.69	NA	NA	NA	NA
Immunoglobulin-like domain-containing receptor 2	ILDR2	0.0344217	0.759	0.731	1.5537	0.0108006	0.0425675	UP
Coiled-coil domain-containing protein 9	CCDC9	0.0344413	0.759	0.846	0.845835	0.0155545	0.0556812	stable
Protein FRG1	FRG1	0.0345279	0.759	-0.944	-0.235017	0.566305	0.738922	stable
Proteasome subunit alpha type-3	PSMA3	0.0345878	0.76	-0.655	0.110994	0.80794	0.904519	stable
Probable ATP-dependent RNA helicase DDX27	DDX27	0.0348296	0.76	0.902	0.345046	0.390042	0.582179	stable
Nucleolar protein 6	NOL6	0.0348704	0.76	1.27	0.208294	0.639025	0.79258	stable
Bifunctional phosphoribosylaminoimidazole carboxylase/phosphoribosylaminoimidazole succinocarboxamide synthetase	PAICS	0.03496	0.761	-0.718	0.825966	0.00129554	0.00824258	stable
GTP-binding nuclear protein Ran	RAN	0.0350466	0.761	-0.755	0.616548	0.0053052	0.0246309	stable
Lamina-associated polypeptide 2, isoform alpha	TMPO	0.0350826	0.761	3.09	0.370203	0.281091	0.465765	stable
Mitogen-activated protein kinase 1	MAPK1	0.0352784	0.762	-0.675	-1.01906	0.00409265	0.0201222	DOWN
Histone H2A type 1-B/E	H2AC4	0.0352984	0.762	1.11	NA	NA	NA	NA
Rapamycin-insensitive companion of mTOR	RICTOR	0.0354639	0.762	-1.18	0.566845	0.125621	0.262594	stable
Actin-related protein 2/3 complex subunit 3	ARPC3	0.0354977	0.762	0.788	-0.750135	0.0453159	0.123563	stable
Protein CMSS1	CMSS1	0.0356229	0.763	1.69	NA	NA	NA	NA
Obscurin-like protein 1	OBSL1	0.0356431	0.763	-0.726	0.932544	0.00201322	0.0116811	stable
Afadin	AFDN	0.0357847	0.763	1.53	NA	NA	NA	NA
ATP-dependent RNA helicase DDX1	DDX1	0.0359501	0.763	-0.757	0.739225	0.0248098	0.0784072	stable
Ras GTPase-activating-like protein IQGAP3	IQGAP3	0.0359811	0.764	1.31	0.380062	0.280898	0.465686	stable
ER membrane protein complex subunit 1	EMC1	0.0360099	0.764	1.75	NA	NA	NA	NA
Double-stranded RNA-specific adenosine deaminase	ADAR	0.0361339	0.764	3.93	0.0920595	0.836821	0.922301	stable
NAD(P) transhydrogenase, mitochondrial	NNT	0.0363215	0.764	2.32	0.454453	0.20311	0.371621	stable
Immunoglobulin heavy variable 3-21	IGHV3-21	0.0365193	0.765	-1.54	NA	NA	NA	NA
Tyrosine-protein kinase JAK1	JAK1	0.0365675	0.765	-1.7	-1.37191	0.000305667	0.00272044	DOWN
Double-stranded RNA-binding protein Staufen homolog 1	STAU1	0.0367872	0.766	-0.709	-0.319412	0.334195	0.526048	stable
UDP-glucose 6-dehydrogenase	UGDH	0.0368111	0.766	2.84	-0.333651	0.495682	0.679531	stable
Casein kinase II subunit alpha'	CSNK2A2	0.0368767	0.766	1.55	-0.344354	0.353107	0.544968	stable
Taperin	TPRN	0.0369067	0.766	-0.693	0.245444	0.572586	0.743729	stable
Small ribosomal subunit protein eS21	RPS21	0.0369368	0.766	1.26	0.392367	0.339335	0.531062	stable
DNA mismatch repair protein Mlh1	MLH1	0.0369835	0.766	1.03	0.70996	0.0303391	0.0912606	stable
N-terminal Xaa-Pro-Lys N-methyltransferase 1	NTMT1	0.037073	0.766	1.68	NA	NA	NA	NA
Probable ATP-dependent RNA helicase DDX47	DDX47	0.0371174	0.767	2.1	0.390692	0.251176	0.431397	stable
Neural cell adhesion molecule 1	NCAM1	0.0371229	0.767	2.56	1.33976	0.0136389	0.0505894	stable
Acidic leucine-rich nuclear phosphoprotein 32 family member E	ANP32E	0.0371705	0.767	-0.821	1.02658	0.00759836	0.0323441	UP
Y-box-binding protein 3	YBX3	0.0372227	0.767	1.01	NA	NA	NA	NA
Translationally-controlled tumor protein	TPT1	0.037255	0.767	2.33	-0.807477	0.0371074	0.106147	stable
Serine/threonine-protein kinase DCLK2	DCLK2	0.0373076	0.767	1.93	-0.175849	0.731638	0.859542	stable
Transportin-1	TNPO1	0.0373395	0.767	0.663	-0.788183	0.00698141	0.0302887	stable
YLP motif-containing protein 1	YLPM1	0.0373408	0.767	2.41	0.00824158	0.988683	0.995595	stable
Carboxyl-terminal PDZ ligand of neuronal nitric oxide synthase protein	NOS1AP	0.0375075	0.768	-0.727	0.907122	0.0259773	0.0813397	stable
COP9 signalosome complex subunit 4	COPS4	0.0375194	0.768	-0.82	-0.474138	0.132743	0.273454	stable
Lysophospholipid acyltransferase 7	MBOAT7	0.0379469	0.769	1.05	0.653756	0.103548	0.228572	stable
Erlin-1	ERLIN1	0.0379803	0.769	0.779	-0.465622	0.191911	0.35697	stable
Tricarboxylate transport protein, mitochondrial	SLC25A1	0.0379969	0.769	1.46	0.0209568	0.969965	0.987417	stable
Homer protein homolog 1	HOMER1	0.0381101	0.769	0.8	1.91395	0.00031056	0.00275554	UP
Desmocollin-1	DSC1	0.0381394	0.769	-4.3	0.782502	0.0251415	0.0791791	stable
Heterogeneous nuclear ribonucleoprotein A/B	HNRNPAB	0.0382147	0.769	0.964	0.305888	0.386673	0.579017	stable
RNA polymerase II-associated protein 3	RPAP3	0.0382417	0.769	1.09	-0.0865118	0.848547	0.929049	stable
RNA-binding motif protein, X chromosome	RBMX	0.03826	0.769	-0.664	0.900344	0.00403795	0.0199341	stable
Large ribosomal subunit protein uL24	RPL26	0.0383571	0.77	-0.657	0.479214	0.148968	0.297729	stable
Large ribosomal subunit protein uL14m	MRPL14	0.0383811	0.77	1.9	0.311727	0.42554	0.617495	stable
Crooked neck-like protein 1	CRNKL1	0.038589	0.77	3.02	0.211495	0.614465	0.775615	stable
Tripartite motif-containing protein 26	TRIM26	0.038623	0.77	1.9	-0.909654	0.00674006	0.0294606	stable
Heat shock 70 kDa protein 14	HSPA14	0.038867	0.771	1.03	0.217103	0.603879	0.768012	stable
Tubulin beta-4B chain	TUBB4B	0.0388982	0.771	-0.629	0.442222	0.189628	0.353558	stable
Serine/arginine-rich splicing factor 10	SRSF10	0.0389435	0.771	-0.644	0.592017	0.0278814	0.0856671	stable
Methylmalonate-semialdehyde dehydrogenase [acylating], mitochondrial	ALDH6A1	0.0389535	0.771	1.24	0.137329	0.752925	0.873056	stable
Adenosine 5'-monophosphoramidase HINT3	HINT3	0.0389591	0.771	-0.924	-0.353186	0.387989	0.58016	stable
DNA replication licensing factor MCM7	MCM7	0.0389646	0.771	-0.694	1.06766	0.000160698	0.00165348	UP
Mannosyl-oligosaccharide glucosidase	MOGS	0.0390647	0.771	1	0.67548	0.014865	0.0539447	stable
Heterogeneous nuclear ribonucleoproteins C1/C2	HNRNPC	0.0391918	0.772	-0.761	0.794634	0.00388034	0.0193327	stable
Delta(14)-sterol reductase LBR	LBR	0.0393277	0.772	0.708	1.705	3.68251e-07	1.1579e-05	UP
Large ribosomal subunit protein eL31	RPL31	0.0394827	0.772	-0.905	0.528073	0.0659076	0.163117	stable
Small ribosomal subunit protein mS22	MRPS22	0.0395798	0.773	1.29	0.125572	0.84896	0.929437	stable
3-mercaptopyruvate sulfurtransferase	MPST	0.0397068	0.773	1.32	1.51269	4.38276e-06	8.77276e-05	UP
FAST kinase domain-containing protein 4	TBRG4	0.0397483	0.773	1.75	0.978064	1.26903e-05	0.000208457	stable
Atlastin-2	ATL2	0.0397531	0.773	0.992	0.28896	0.478696	0.664866	stable
Transportin-2	TNPO2	0.0397599	0.773	2.04	0.336314	0.382339	0.574669	stable
NHL repeat-containing protein 2	NHLRC2	0.0398033	0.773	1.08	-0.664943	0.101176	0.224576	stable
Pleckstrin homology domain-containing family A member 2	PLEKHA2	0.0398968	0.773	1.41	0.986815	0.015062	0.0544453	stable
Neuroblast differentiation-associated protein AHNAK	AHNAK	0.0400354	0.774	-1.49	-3.86847	3.68068e-15	4.46013e-12	DOWN
Death-associated protein kinase 1	DAPK1	0.0401249	0.774	0.743	-1.82049	0.00578084	0.0261984	DOWN
ATP synthase subunit gamma, mitochondrial	ATP5F1C	0.0401501	0.774	-0.73	NA	NA	NA	NA
Coactosin-like protein	COTL1	0.0401503	0.774	0.995	0.849028	0.00704984	0.0304848	stable
Rho guanine nucleotide exchange factor 40	ARHGEF40	0.0403045	0.774	2.1	-0.193678	0.653931	0.804889	stable
Eukaryotic translation initiation factor 3 subunit G	EIF3G	0.0403878	0.774	0.853	0.274749	0.486173	0.671338	stable
WD repeat-containing protein 48	WDR48	0.0404465	0.775	-1.63	0.155915	0.72059	0.852931	stable
E3 ubiquitin-protein ligase TRIM56	TRIM56	0.0409437	0.776	1.27	-0.283766	0.533234	0.710662	stable
Nuclear autoantigen Sp-100	SP100	0.0409452	0.776	-0.977	-2.5847	2.70494e-08	1.29912e-06	DOWN
Glia maturation factor beta	GMFB	0.0409778	0.776	-0.811	-0.458673	0.275796	0.459409	stable
Heterogeneous nuclear ribonucleoprotein K	HNRNPK	0.041	0.776	-0.728	0.725336	0.00893811	0.0368399	stable
Vesicle-trafficking protein SEC22b	SEC22B	0.0411512	0.776	3.2	-0.416355	0.189089	0.352817	stable
Nuclear cap-binding protein subunit 1	NCBP1	0.0411537	0.776	2.53	0.372959	0.282855	0.468048	stable
Rho guanine nucleotide exchange factor 11	ARHGEF11	0.0412531	0.776	1.08	0.36453	0.304446	0.492498	stable
Malectin	MLEC	0.041254	0.776	2.14	-0.019328	0.9684	0.986562	stable
Dynamin-like 120 kDa protein, mitochondrial	OPA1	0.0415345	0.777	2.73	0.766011	0.00503951	0.0236916	stable
Flotillin-2	FLOT2	0.0415697	0.777	0.762	1.47091	2.6125e-06	5.87087e-05	UP
Rho GDP-dissociation inhibitor 1	ARHGDIA	0.0416645	0.777	2.14	-0.342029	0.357047	0.54922	stable
Elongator complex protein 3	ELP3	0.0417923	0.778	1.01	0.0270989	0.952042	0.979781	stable
Nidogen-2	NID2	0.0422802	0.779	-1.8	-0.126063	0.785835	0.892087	stable
Mitotic checkpoint protein BUB3	BUB3	0.0423088	0.779	0.65	-0.16242	0.706847	0.842791	stable
Exosome complex component RRP42	EXOSC7	0.0423134	0.779	0.617	1.09988	0.00419773	0.0205654	UP
Coiled-coil domain-containing protein 85C	CCDC85C	0.0423476	0.779	-0.918	-0.29815	0.422521	0.614549	stable
Keratin, type I cytoskeletal 10	KRT10	0.0424277	0.779	-3.4	-0.777126	0.000933087	0.00638251	stable
Pogo transposable element with ZNF domain	POGZ	0.0424502	0.779	-0.678	1.08043	0.0066848	0.0292841	UP
Programmed cell death protein 10	PDCD10	0.0426518	0.779	1.53	-0.543674	0.109742	0.238159	stable
Actin-like protein 6A	ACTL6A	0.0426812	0.779	1.47	0.436002	0.16884	0.325868	stable
Large ribosomal subunit protein uL15m	MRPL15	0.0426993	0.779	1.64	0.212932	0.656225	0.806181	stable
Disks large homolog 1	DLG1	0.0426996	0.779	2.1	-0.85368	0.0142312	0.052245	stable
Annexin A6	ANXA6	0.0427827	0.78	-1.45	0.0767896	0.862696	0.937176	stable
Ubiquitin carboxyl-terminal hydrolase 7	USP7	0.042848	0.78	-1.75	0.654189	0.0681828	0.167199	stable
Heterogeneous nuclear ribonucleoprotein M	HNRNPM	0.0428906	0.78	-0.669	0.856548	0.00215128	0.0122831	stable
Small ribosomal subunit protein uS2	RPSA	0.0431469	0.78	-0.77	0.846381	0.0258083	0.0809393	stable
DNA mismatch repair protein Msh6	MSH6	0.0432052	0.78	2.61	0.766934	0.000810488	0.00578247	stable
H/ACA ribonucleoprotein complex subunit DKC1	DKC1	0.0432502	0.781	1.64	0.637316	0.0162242	0.0574338	stable
Deoxynucleoside triphosphate triphosphohydrolase SAMHD1	SAMHD1	0.0432801	0.781	1.52	0.191814	0.671933	0.817097	stable
Estradiol 17-beta-dehydrogenase 11	HSD17B11	0.0433677	0.781	0.921	-0.500399	0.40202	0.594315	stable
Collagen alpha-1(VI) chain	COL6A1	0.0434179	0.781	1.78	-2.45897	1.44921e-13	6.34152e-11	DOWN
Signal peptidase complex catalytic subunit SEC11A	SEC11A	0.0434239	0.781	-0.676	-0.367182	0.269941	0.453413	stable
Casein kinase II subunit beta	CSNK2B	0.0434354	0.781	1.19	-0.0261778	0.953065	0.980252	stable
PCI domain-containing protein 2	PCID2	0.0438478	0.782	1.75	-0.276027	0.537268	0.714468	stable
Fibronectin type III and SPRY domain-containing protein 1	FSD1	0.0439141	0.782	1.38	1.5114	9.22546e-06	0.00016094	UP
Capping protein-inhibiting regulator of actin dynamics	CRACD	0.0439734	0.782	2	NA	NA	NA	NA
Lipoma-preferred partner	LPP	0.0439746	0.782	2.36	-1.1693	0.000641404	0.00480915	DOWN
Cleavage and polyadenylation specificity factor subunit 4	CPSF4	0.0445469	0.783	1.68	0.967979	0.00807573	0.0339277	stable
Methylsterol monooxygenase 1	MSMO1	0.0445671	0.783	-0.99	-0.791722	0.0959763	0.21528	stable
Tyrosine-protein phosphatase non-receptor type 1	PTPN1	0.0446377	0.783	1.3	-0.349995	0.319094	0.509444	stable
Eukaryotic translation initiation factor 4 gamma 1	EIF4G1	0.044994	0.784	-6.63	0.164406	0.748058	0.869164	stable
Vacuolar protein sorting-associated protein 28 homolog	VPS28	0.0450431	0.784	0.86	0.454136	0.219182	0.392316	stable
Heterogeneous nuclear ribonucleoprotein A1	HNRNPA1	0.045318	0.785	0.61	1.15484	0.000551345	0.0042778	UP
Elongation factor Tu, mitochondrial	TUFM	0.0454771	0.785	-0.646	0.703951	0.00902874	0.0371357	stable
Protein arginine N-methyltransferase 1	PRMT1	0.0457884	0.785	-0.648	0.783027	0.00223789	0.0126406	stable
Laminin subunit alpha-5	LAMA5	0.0457896	0.785	1.99	-0.0849667	0.869174	0.940837	stable
Tubulin beta-6 chain	TUBB6	0.0457956	0.785	0.72	-0.494388	0.309358	0.497734	stable
Interferon-induced protein with tetratricopeptide repeats 1	IFIT1	0.0460451	0.786	2.11	-1.5866	0.00781233	0.033025	DOWN
Protein phosphatase methylesterase 1	PPME1	0.0460847	0.786	-0.604	-0.0757864	0.874132	0.943165	stable
Phosphoribosyl pyrophosphate synthase-associated protein 1	PRPSAP1	0.0461728	0.786	1.49	0.194479	0.678361	0.822184	stable
MAP7 domain-containing protein 1	MAP7D1	0.0462627	0.786	1.23	-0.833592	0.000733324	0.00534323	stable
Target of Myb1 membrane trafficking protein	TOM1	0.0462898	0.786	2.26	-0.502607	0.0908659	0.2066	stable
Splicing factor 3B subunit 3	SF3B3	0.0462981	0.786	0.884	0.838441	0.0069599	0.030212	stable
Zinc finger protein 787	ZNF787	0.0464609	0.787	-0.879	0.715593	0.0121309	0.0465865	stable
Serine/threonine-protein phosphatase 6 catalytic subunit	PPP6C	0.0464784	0.787	-0.724	-0.383975	0.263273	0.444945	stable
S-phase kinase-associated protein 1	SKP1	0.0465727	0.787	1.97	-0.272021	0.482188	0.667427	stable
SLIT-ROBO Rho GTPase-activating protein 2	SRGAP2	0.0466075	0.787	-0.677	0.463472	0.270783	0.454046	stable
Structural maintenance of chromosomes protein 2	SMC2	0.0466426	0.787	1.81	0.679255	0.00770096	0.0326637	stable
Nucleophosmin	NPM1	0.0466904	0.787	-0.701	0.664991	0.0942482	0.212261	stable
U6 snRNA-associated Sm-like protein LSm4	LSM4	0.0470603	0.788	1.58	0.673634	0.00228175	0.0128327	stable
Protocadherin gamma-C3	PCDHGC3	0.0473964	0.788	-1.95	-1.79831	0.00291269	0.0155065	DOWN
Electron transfer flavoprotein subunit beta	ETFB	0.0477727	0.789	0.755	0.641738	0.0491062	0.131047	stable
Mitochondrial-processing peptidase subunit alpha	PMPCA	0.0477737	0.789	-0.723	0.935972	0.00566155	0.0258168	stable
Zyxin	ZYX	0.0479395	0.789	1.15	-0.607965	0.158385	0.310664	stable
Succinate--CoA ligase [GDP-forming] subunit beta, mitochondrial	SUCLG2	0.0480295	0.789	2.46	0.446927	0.299189	0.486843	stable
Sorting nexin-2	SNX2	0.0482355	0.79	-0.968	-0.145921	0.785623	0.892087	stable
Small nuclear ribonucleoprotein Sm D1	SNRPD1	0.0485147	0.79	-0.639	1.52002	4.00631e-10	4.01194e-08	UP
Cyclin-dependent kinase 16	CDK16	0.0490729	0.791	0.675	0.148498	0.741309	0.865368	stable
Fructose-2,6-bisphosphatase TIGAR	TIGAR	0.0491203	0.791	1.02	NA	NA	NA	NA
Eukaryotic translation initiation factor 5B	EIF5B	0.0492348	0.791	1.25	0.727806	0.0875785	0.200936	stable
Rho GTPase-activating protein 26	ARHGAP26	0.0494782	0.792	1.21	0.948544	0.0176617	0.0609608	stable
Actin filament-associated protein 1	AFAP1	0.0494905	0.792	1.52	-2.01493	1.32361e-07	4.77137e-06	DOWN
Nitric oxide synthase-interacting protein	NOSIP	0.0495425	0.792	1.26	0.376909	0.354478	0.546603	stable
DAZ-associated protein 1	DAZAP1	0.0496083	0.792	0.841	0.545677	0.0572496	0.147213	stable
Gap junction gamma-1 protein	GJC1	0.0497396	0.792	1.45	-1.05372	0.00254174	0.0139517	DOWN
Peptidyl-prolyl cis-trans isomerase B	PPIB	0.0498688	0.792	1.95	-0.290357	0.42764	0.619674	stable
Lactoylglutathione lyase	GLO1	0.049997	0.793	2.38	0.298301	0.455004	0.645034	stable
