# Supplementary material
Source: Research Square preprint supplement (doi:10.21203/rs.3.rs-6009404/v1)
Supplement: Supplementary file 7 [file 657f18845e2c3c3b6ac9b2f5.xlsx]

## Sheet: GSC_vs_DGC_LFC0.58
GSE89623
gene name	log2FoldChange	P.Value	adj.P.Val	group	log10(padj)
SEMA3F	-0.865486	0.0024317	0.0140623	down	1.85194
ANKIB1	-0.599928	0.000419321	0.0047677	down	2.32169
HECW1	-2.0126	0.00981031	0.0372097	down	1.42934
KLHL13	-1.24617	0.00577889	0.0255353	down	1.59286
DBNDD1	-0.866765	0.00523426	0.0238795	down	1.62197
PLXND1	-1.87053	2.45276e-05	0.00119032	down	2.92433
THSD7A	-1.17469	0.000285099	0.00387796	down	2.4114
ATOSB	-1.98944	6.51629e-06	0.000640918	down	3.1932
PRKAR2B	-1.52368	0.0126512	0.0448918	down	1.34783
TSPOAP1	-1.31832	0.00163678	0.0108234	down	1.96564
CROT	-0.669968	3.75268e-05	0.00145033	down	2.83853
RHBDD2	-0.68311	0.000243247	0.00355118	down	2.44963
MYCBP2	-0.615812	0.0111756	0.0409385	down	1.38787
LAMP2	-1.17644	0.000613037	0.00586035	down	2.23208
CRLF1	-5.0148	0.000425366	0.00478591	down	2.32004
OSBPL7	-0.680324	0.000643357	0.00601985	down	2.22041
CX3CL1	-0.766166	0.00365383	0.0185909	down	1.7307
SPATA20	-1.17487	0.00157597	0.0105515	down	1.97668
CACNA1G	-1.76426	0.00463556	0.0219726	down	1.65812
KDM7A	-1.81631	8.52796e-06	0.000731633	down	3.13571
ALDH3B1	-1.31308	0.000143931	0.00269873	down	2.56884
PHTF2	-2.06304	0.00164465	0.0108492	down	1.9646
USH1C	-0.617262	4.22478e-05	0.00150048	down	2.82377
TBXA2R	-1.57751	6.83934e-05	0.00189304	down	2.72284
GTF2IRD1	-0.76009	0.000148782	0.0027634	down	2.55856
ARSD	-0.659477	0.00861377	0.0337701	down	1.47147
PIGQ	-0.862068	3.62122e-05	0.00142959	down	2.84479
MYLIP	-1.37372	0.00476462	0.0224426	down	1.64893
CDKL5	-1.16352	0.00882234	0.0343364	down	1.46424
CYTH3	-1.69055	3.77529e-05	0.00145033	down	2.83853
CYB561	-0.690316	0.000161965	0.00289958	down	2.53767
SPAG9	-0.716054	0.0103418	0.0386852	down	1.41246
PKD1	-0.939709	5.30517e-06	0.0005694	down	3.24458
VTA1	-0.768251	0.000202322	0.00323702	down	2.48985
IFFO1	-0.671823	0.0128097	0.0453102	down	1.3438
GIPR	-1.54763	0.00118801	0.00871351	down	2.05981
IDS	-0.676996	0.0107594	0.0398039	down	1.40007
CD4	-1.56671	2.07144e-05	0.00109472	down	2.9607
LRRC23	-0.898047	0.000525102	0.00540596	down	2.26713
HFE	-0.912003	0.00121703	0.00887386	down	2.05189
HIVEP2	-0.975481	0.00070673	0.00637504	down	2.19552
MRC2	-2.9907	1.23874e-05	0.000882857	down	3.05411
TSPAN9	-1.19471	0.000468201	0.00505107	down	2.29662
BTBD7	-0.625374	0.00261528	0.0147453	down	1.83135
CALCOCO1	-1.57039	0.000130005	0.00255743	down	2.5922
MAN2B2	-0.755899	0.000597741	0.00577856	down	2.23818
MVP	-1.02721	0.00256708	0.0145489	down	1.83717
DNASE1L1	-1.7669	0.000417778	0.0047557	down	2.32279
GPRC5A	-0.803554	0.00173003	0.0112192	down	1.95004
ACP3	-1.41168	0.00395893	0.0195949	down	1.70786
MTMR11	-1.35645	0.00659577	0.0279305	down	1.55392
STMN4	-1.49825	0.00429454	0.0207938	down	1.68207
PHLDB1	-1.16607	0.000919439	0.00747356	down	2.12647
PRDM11	-0.635915	0.0020643	0.0126033	down	1.89952
SNAI2	-3.70947	7.84621e-05	0.00204331	down	2.68966
ADGRA2	-2.25896	0.012381	0.0441567	down	1.355
SAMD4A	-0.626773	0.00111606	0.00836852	down	2.07735
GRAMD1B	-1.6091	0.0102894	0.0385401	down	1.41409
EHD2	-1.21035	8.48782e-05	0.00212388	down	2.67287
CCDC28A	-0.859246	0.000141598	0.00268278	down	2.57141
RRAGD	-1.85697	0.00433552	0.0209463	down	1.67889
NR1H3	-0.870937	0.000238281	0.00351881	down	2.4536
VIM	-0.781483	2.89356e-05	0.00127716	down	2.89375
CD44	-2.66049	4.00375e-05	0.00146722	down	2.83351
GRN	-1.25817	5.28778e-05	0.00172357	down	2.76357
ARHGAP31	-0.975083	5.63798e-05	0.00177355	down	2.75116
ARID4A	-0.684543	0.0095986	0.036617	down	1.43632
PNPLA6	-0.739924	0.00486542	0.0227579	down	1.64287
CHPF2	-1.04307	0.00253666	0.0144625	down	1.83976
FUT8	-0.754949	2.9086e-05	0.00127811	down	2.89343
APBA2	-1.15842	0.000110104	0.00235561	down	2.6279
PEX3	-0.683094	0.00291659	0.0159231	down	1.79797
GABARAPL2	-0.679566	8.76146e-05	0.0021463	down	2.66831
CYP46A1	-0.942987	8.277e-05	0.0021003	down	2.67772
TUBG2	-1.02577	0.00505237	0.023329	down	1.6321
VCAN	-1.36983	0.00503992	0.0232772	down	1.63307
PARP3	-1.32851	4.39535e-05	0.00153392	down	2.8142
LCP2	-0.749071	0.00181285	0.0116006	down	1.93552
GPM6B	-1.43489	0.000265054	0.0037175	down	2.42975
ATOSA	-1.41347	1.5488e-05	0.000962173	down	3.01675
HDAC9	-2.4859	2.68685e-06	0.000423176	down	3.37348
SNX29	-0.629672	0.000169366	0.00295939	down	2.5288
VPS13D	-0.817002	0.0129415	0.0456279	down	1.34077
COL9A2	-3.78681	2.54974e-05	0.00121177	down	2.91658
ELN	-1.56993	0.000216594	0.00335086	down	2.47484
DKK3	-2.14549	0.00563507	0.0250957	down	1.6004
MAPK9	-0.596456	0.000480425	0.00511885	down	2.29083
COL23A1	-1.83136	0.00998622	0.0376249	down	1.42452
HEBP2	-0.889347	0.00522268	0.0238578	down	1.62237
FOXC1	-3.32606	6.03189e-05	0.00181121	down	2.74203
GALC	-1.02711	0.000227639	0.00344113	down	2.4633
TRAF1	-1.22663	0.000382028	0.00456086	down	2.34095
ATG5	-0.605901	0.00618042	0.0267548	down	1.5726
ATP2B4	-1.26669	0.00634113	0.0272186	down	1.56513
PSD	-0.914211	0.00250869	0.0143608	down	1.84282
PTPRU	-3.21657	0.000676243	0.00617309	down	2.2095
PRDM6	-1.99888	0.00101784	0.00791806	down	2.10138
LTK	-3.20436	7.48997e-07	0.000247225	down	3.60691
VMP1	-0.667433	2.90786e-05	0.00127811	down	2.89343
AHRR	-0.602375	0.000616899	0.00588057	down	2.23058
DLX3	-7.39768	3.25554e-06	0.000460845	down	3.33644
TSPAN32	-0.599282	0.00419062	0.0204354	down	1.68962
NGFR	-3.84056	0.0119619	0.0429693	down	1.36684
CDON	-3.33194	5.99441e-07	0.000226074	down	3.64575
ABCA7	-0.864576	0.00129386	0.00922642	down	2.03497
SBNO2	-1.03536	0.000686394	0.00623132	down	2.20542
HMG20B	-0.64732	0.0105231	0.0391711	down	1.40703
OAT	-0.755519	0.00144601	0.00992591	down	2.00323
DGKA	-0.826947	0.000720361	0.00645394	down	2.19017
MYLK	-2.0981	5.82532e-05	0.0017849	down	2.74839
KDM4A	-0.697564	0.0131189	0.0460345	down	1.33692
GOLGA5	-0.674552	0.00128841	0.00920103	down	2.03616
KIF26A	-3.63277	0.00760023	0.0310176	down	1.50839
SP100	-1.21325	0.000845638	0.00708619	down	2.14959
PLPP1	-1.83275	3.41367e-05	0.00138444	down	2.85873
TNFRSF1A	-0.706248	0.000222377	0.00338744	down	2.47013
EVI5	-0.909534	5.79559e-05	0.0017849	down	2.74839
STOML1	-0.799555	0.000451251	0.00493913	down	2.30635
TRO	-0.907311	1.49392e-06	0.000327875	down	3.48429
CBFB	-3.01863	2.09949e-06	0.000391767	down	3.40697
FGFR3	-3.22436	5.01393e-07	0.000211417	down	3.67486
MEF2A	-1.59005	1.00616e-05	0.000799081	down	3.09741
TFE3	-0.667321	9.99818e-05	0.0022749	down	2.64304
LAPTM4A	-0.752082	0.00593389	0.026	down	1.58503
PPP2R5B	-0.970887	0.000481394	0.00512642	down	2.29019
SDK2	-5.14477	0.000180148	0.00308772	down	2.51036
BCL3	-1.14756	0.00182318	0.0116516	down	1.93361
RORA	-1.18608	0.00493521	0.0229861	down	1.63853
SLC44A1	-1.34638	0.00010859	0.00234307	down	2.63022
FSTL3	-0.702075	0.0124413	0.0443297	down	1.35331
WIPI1	-1.42666	0.000242725	0.00355118	down	2.44963
TESK2	-0.901067	0.00565004	0.0251341	down	1.59974
ATP2B1	-0.886884	0.0105779	0.0393291	down	1.40529
SEL1L	-0.644072	5.43286e-05	0.00174965	down	2.75705
ATP6AP1	-0.772169	4.34361e-05	0.00152627	down	2.81637
CYBRD1	-1.39125	0.00119121	0.00873054	down	2.05896
ADGRL1	-1.42041	8.05776e-06	0.000720479	down	3.14238
ZFYVE26	-0.654943	2.85938e-05	0.00127308	down	2.89515
SPEG	-0.934599	0.000403161	0.00469991	down	2.32791
P4HA2	-3.15334	3.11734e-06	0.000456118	down	3.34092
ACADVL	-0.805435	0.00019567	0.0031819	down	2.49731
EVC	-0.696482	0.0113094	0.0412686	down	1.38438
IRAG1	-1.08575	0.00159838	0.0106614	down	1.97219
PDE8A	-0.639705	0.000771564	0.00672721	down	2.17217
CLCN4	-0.667356	0.000202375	0.00323702	down	2.48985
TBX21	-0.94756	0.000692488	0.00627513	down	2.20238
PICALM	-0.691641	0.00716033	0.029718	down	1.52698
MGLL	-1.38859	9.73872e-05	0.00224923	down	2.64797
SLC24A1	-0.793198	0.0115348	0.0418064	down	1.37876
GRAMD4	-1.92691	0.000353107	0.00438016	down	2.35851
CELSR1	-0.673341	3.84832e-05	0.00145571	down	2.83693
FNDC3B	-0.586932	8.85098e-05	0.0021463	down	2.66831
FOSL2	-2.43238	9.26115e-05	0.00218149	down	2.66125
SEC31B	-0.915202	0.00288503	0.01579	down	1.80162
KIFAP3	-1.53764	0.000155726	0.00282876	down	2.5484
RBMS2	-0.704541	0.0137681	0.0477689	down	1.32085
KLHL20	-1.00405	0.00403357	0.0198715	down	1.70177
RGS11	-1.44285	0.0109988	0.040478	down	1.39278
TP53INP2	-1.63978	5.60533e-07	0.000222988	down	3.65172
SDF4	-0.680692	6.28753e-05	0.00184057	down	2.73505
TOLLIP	-0.870372	3.72775e-05	0.00144856	down	2.83906
TNS1	-1.48994	0.00933644	0.0358654	down	1.44532
RAPGEF3	-1.58621	0.00556338	0.0248883	down	1.60401
RABL2B	-0.712413	0.000909325	0.00742522	down	2.12929
DLGAP4	-1.23337	4.685e-06	0.000549096	down	3.26035
TCF7	-0.693413	0.00752581	0.03079	down	1.51159
MEF2C	-1.99606	0.000515137	0.00534872	down	2.27175
PKP1	-2.69263	0.000790945	0.00680631	down	2.16709
NFE2L1	-0.775473	6.23449e-05	0.00183203	down	2.73707
DOP1A	-0.711537	0.000606859	0.0058269	down	2.23456
PLOD1	-1.00936	8.26228e-05	0.00209925	down	2.67793
RRAGB	-0.866867	8.7409e-05	0.0021463	down	2.66831
CYLD	-1.33677	0.000101685	0.00228999	down	2.64017
FAT1	-0.973313	0.0136183	0.0473738	down	1.32446
SMAP2	-1.44046	0.00223336	0.0132691	down	1.87716
REST	-0.760385	7.29245e-05	0.00195516	down	2.70882
COL16A1	-0.808151	0.0133649	0.04673	down	1.3304
EFR3B	-2.01937	0.00520747	0.0238176	down	1.6231
MAPRE3	-0.916793	2.29496e-06	0.000391767	down	3.40697
OVGP1	-1.26491	0.00158085	0.01057	down	1.97593
B4GALT1	-1.81037	9.18037e-05	0.00217367	down	2.66281
GNAS	-1.60949	9.64428e-05	0.00223806	down	2.65013
PTHLH	-1.92047	6.55605e-06	0.000640918	down	3.1932
C3orf18	-0.669289	0.000455778	0.00497117	down	2.30354
SMOX	-0.870713	0.00600344	0.0262293	down	1.58121
CPXM1	-0.667175	0.00578583	0.0255603	down	1.59243
SLC8B1	-0.818131	0.00345386	0.017962	down	1.74564
TASP1	-0.823961	0.00406219	0.0199556	down	1.69994
PXN	-0.782833	0.000272069	0.00378111	down	2.42238
GMIP	-0.73455	0.00376265	0.0189645	down	1.72206
ARHGAP4	-0.692793	1.737e-05	0.0010095	down	2.99589
ANKRD24	-0.783058	0.000714422	0.0064242	down	2.19218
GPATCH2L	-0.675331	0.000329031	0.00420421	down	2.37632
PCBP4	-0.773594	0.00458161	0.0218056	down	1.66143
YPEL3	-1.3062	0.000215722	0.00334259	down	2.47592
GNPTG	-0.759192	0.000187193	0.00312249	down	2.5055
EFNB1	-1.33511	0.000323712	0.00416309	down	2.38058
PLEKHG2	-0.760971	6.13434e-05	0.00182192	down	2.73947
LAMB1	-0.888373	0.00674503	0.0284109	down	1.54652
ALKBH5	-0.855679	0.0138145	0.0478881	down	1.31977
NLRP1	-2.25734	6.76964e-05	0.00189197	down	2.72308
PITPNM3	-1.57397	1.0656e-05	0.000818527	down	3.08697
CCDC80	-1.76144	0.000535864	0.0054518	down	2.26346
JPH4	-0.935952	0.0129199	0.0455762	down	1.34126
SLC7A8	-1.43792	0.00859607	0.0337353	down	1.47192
CAPN3	-0.597828	0.0114445	0.0415931	down	1.38098
UNC13D	-0.633734	0.00326475	0.0172814	down	1.76242
UPRT	-0.604154	0.00210479	0.0127796	down	1.89348
SORBS1	-1.22794	7.63523e-05	0.00199888	down	2.69921
BAMBI	-2.25413	0.000118849	0.00246195	down	2.60872
IL11	-2.26126	0.00016357	0.00291157	down	2.53587
JAK2	-1.14819	3.77779e-05	0.00145033	down	2.83853
NRP1	-4.26683	1.39074e-06	0.000327875	down	3.48429
PALMD	-1.15056	0.0115573	0.041865	down	1.37815
OCEL1	-0.996626	0.00117716	0.00865281	down	2.06284
HSD3B7	-1.3475	0.00388743	0.0193625	down	1.71304
HCN2	-2.09091	0.00116816	0.00861259	down	2.06487
GADD45B	-2.98167	1.03577e-05	0.000806325	down	3.09349
LZTR1	-0.668104	0.000471733	0.00506436	down	2.29548
P2RX6	-1.92116	7.59451e-07	0.000247225	down	3.60691
TBC1D10A	-1.37481	0.00489176	0.0228321	down	1.64145
PPM1F	-0.620926	0.00925867	0.0356496	down	1.44795
LRP5L	-1.25603	0.0127668	0.0452097	down	1.34477
PIK3IP1	-3.0689	8.45432e-06	0.000731633	down	3.13571
TIMP3	-4.42614	8.17807e-06	0.000723168	down	3.14076
DNAL4	-0.764856	0.000668949	0.00615124	down	2.21104
TTLL1	-0.690933	1.42387e-05	0.000934032	down	3.02964
RASL10A	-1.50254	0.000279124	0.00384613	down	2.41498
TOM1	-0.888254	0.000259148	0.00367009	down	2.43532
HMOX1	-0.930083	0.0138446	0.0479673	down	1.31905
ARSA	-1.16451	1.25653e-05	0.000882857	down	3.05411
RASD2	-1.71437	0.0116008	0.0419841	down	1.37692
CBX7	-1.36839	0.00447019	0.0214504	down	1.66856
APOL4	-1.41083	0.0015735	0.0105429	down	1.97704
GRAP2	-0.963949	0.00285208	0.0156659	down	1.80504
PMM1	-0.669247	1.86227e-06	0.000376597	down	3.42412
SOS2	-0.937526	5.44593e-05	0.00174965	down	2.75705
LGMN	-1.86773	0.00176095	0.011375	down	1.94405
DHRS7	-0.860974	0.000589332	0.0057308	down	2.24178
SUSD6	-1.27801	2.28359e-05	0.00115081	down	2.939
PCNX1	-0.753536	0.000161223	0.00289376	down	2.53854
NFKBIA	-1.86824	4.83583e-08	7.80996e-05	down	4.10735
NFATC4	-1.19273	0.0010859	0.00823271	down	2.08446
ABHD12	-1.20967	1.39048e-05	0.000930961	down	3.03107
PROCR	-0.999635	0.00203921	0.012504	down	1.90295
RNF24	-1.44087	2.65753e-06	0.000423176	down	3.37348
SNTA1	-1.29481	8.64036e-05	0.0021463	down	2.66831
PXMP4	-0.875801	0.000236348	0.0034981	down	2.45617
MAP1LC3A	-1.40738	1.00802e-05	0.000799081	down	3.09741
SYNDIG1	-1.81402	4.65452e-08	7.80996e-05	down	4.10735
TNNC2	-0.675973	0.0108213	0.039951	down	1.39847
ST8SIA5	-1.27665	0.00294996	0.0160522	down	1.79446
SMAD7	-5.92296	3.42321e-05	0.00138444	down	2.85873
ANKRD12	-0.629453	0.00179054	0.0114987	down	1.93935
MXRA5	-3.96033	0.0146559	0.0499053	down	1.30185
ATG4A	-0.970272	0.00144696	0.00992591	down	2.00323
STS	-0.774884	0.00171892	0.0111689	down	1.95199
ABCD1	-1.77836	0.000723768	0.00647146	down	2.189
RENBP	-1.59043	0.000839664	0.00705403	down	2.15156
KCND1	-1.21748	0.00139031	0.00965029	down	2.01546
PORCN	-0.790541	0.00763353	0.0310959	down	1.5073
MAGED2	-0.847944	5.86288e-06	0.000602023	down	3.22039
ARMCX3	-1.1391	3.8382e-05	0.00145571	down	2.83693
ACP5	-4.38284	1.56554e-05	0.000965753	down	3.01513
TRADD	-1.75615	1.30004e-05	0.000900846	down	3.04535
HSF4	-1.69067	1.96372e-06	0.000388353	down	3.41077
NFAT5	-0.767767	0.0116526	0.0420721	down	1.37601
ZNF423	-2.44211	8.60891e-05	0.0021463	down	2.66831
NME3	-0.721067	0.00353836	0.0182328	down	1.73915
NDRG4	-0.703256	1.24321e-05	0.000882857	down	3.05411
HCFC1R1	-0.721701	0.00652156	0.027717	down	1.55725
WFDC1	-0.687751	0.00112069	0.00838213	down	2.07665
ABCC1	-1.18735	0.00031062	0.00407134	down	2.39026
CLCN7	-0.66084	0.000375061	0.00451302	down	2.34553
PRSS33	-0.715839	0.00363325	0.0185195	down	1.73237
STX4	-0.890152	0.00665845	0.0281119	down	1.55111
CDIPT	-0.680463	0.00155208	0.0104552	down	1.98067
IL21R	-4.24637	3.23826e-05	0.00134823	down	2.87024
RASL12	-1.7371	0.00810711	0.032399	down	1.48947
TTC23	-0.747046	0.000383473	0.0045726	down	2.33984
CEMIP	-3.18006	0.00103372	0.00798682	down	2.09763
HOMER2	-2.24384	0.000107693	0.00234019	down	2.63075
ZNF106	-1.06202	0.0033509	0.0175962	down	1.75458
BMF	-2.71806	0.00249365	0.0143043	down	1.84453
RIPK2	-1.08994	0.00221002	0.0132002	down	1.87942
CPQ	-0.822715	0.0081403	0.0324793	down	1.48839
BPNT2	-0.695961	0.0137503	0.0477406	down	1.32111
TRPS1	-0.710266	1.32799e-05	0.000916614	down	3.03781
BNIP3L	-0.894485	0.0093896	0.0360138	down	1.44353
NUCB1	-0.605684	0.000598922	0.00578433	down	2.23775
GYS1	-1.05666	0.000303902	0.00403398	down	2.39427
RELB	-0.758252	5.76475e-05	0.0017849	down	2.74839
LIN7B	-2.80033	0.005345	0.0242507	down	1.61528
FCGRT	-1.47042	0.000214696	0.00333669	down	2.47668
SLC17A7	-1.12651	0.00991086	0.0374263	down	1.42682
TBC1D17	-0.616276	0.00016557	0.00292417	down	2.534
DYRK1B	-1.29699	0.000109458	0.00235275	down	2.62843
CCNP	-0.824134	0.00539369	0.0243823	down	1.61292
PLD3	-0.847438	0.000622626	0.00591525	down	2.22803
SHD	-2.87253	0.000979367	0.00773579	down	2.1115
CLIP3	-0.812032	6.85786e-05	0.00189506	down	2.72238
APLP1	-2.09415	0.000610628	0.00584717	down	2.23305
TGFB1	-1.44318	1.36742e-06	0.000327875	down	3.48429
ICAM5	-1.82282	7.20434e-05	0.00194648	down	2.71075
MEIS3	-0.68792	0.000897514	0.00735605	down	2.13336
CNFN	-2.91722	0.000561767	0.00559733	down	2.25202
MEGF8	-0.682303	0.000107182	0.00233647	down	2.63144
GRIN2D	-1.55828	0.000259493	0.00367068	down	2.43525
SYNGR4	-2.64741	0.000851169	0.00710813	down	2.14824
PLA2G4C	-2.05401	1.65362e-07	0.000117041	down	3.93166
CAPS	-4.65211	7.03757e-07	0.000246784	down	3.60768
PLPPR2	-1.22231	4.60912e-05	0.00157218	down	2.8035
CACNG7	-1.2716	0.000268396	0.00375111	down	2.42584
DNASE2	-1.70926	0.0022759	0.0134638	down	1.87083
JAK3	-0.749442	0.0108965	0.0401688	down	1.39611
COMP	-4.75368	0.0116863	0.0421571	down	1.37513
RASA4	-2.34315	7.21288e-05	0.00194648	down	2.71075
HBP1	-1.28296	8.7611e-05	0.0021463	down	2.66831
WDR91	-0.669009	1.16573e-05	0.000856862	down	3.06709
CAV2	-1.52426	0.00429218	0.0207926	down	1.68209
IQCE	-1.16834	5.14077e-06	0.000568805	down	3.24504
STX1A	-0.593719	0.00567249	0.0251871	down	1.59882
ZKSCAN1	-0.62064	3.15963e-08	6.95751e-05	down	4.15755
PCOLCE	-1.50275	0.00335414	0.0175992	down	1.75451
MYL10	-1.9513	0.0014876	0.010124	down	1.99465
ZNF862	-0.65314	5.97399e-06	0.000604107	down	3.21889
AHR	-1.52674	6.59156e-05	0.00187959	down	2.72594
PRKAG2	-1.00569	0.00891367	0.0346103	down	1.46079
AEBP1	-0.899284	0.0058402	0.025739	down	1.58941
GCK	-0.784513	0.00456174	0.021746	down	1.66262
LIMK1	-0.751463	0.0108299	0.0399753	down	1.39821
MEGF9	-1.28294	0.000261668	0.00368829	down	2.43317
PTGR1	-1.10813	0.00683875	0.0287201	down	1.54181
ENG	-2.23601	0.00974117	0.0370393	down	1.43134
AK1	-1.03636	0.000954009	0.00760521	down	2.11889
CDC37L1	-0.66193	0.00503623	0.0232772	down	1.63307
RIC1	-0.60408	0.000203378	0.00323838	down	2.48967
NCS1	-0.95408	0.000170655	0.00297452	down	2.52658
NPDC1	-1.31334	1.52655e-05	0.000957539	down	3.01884
PTGDS	-5.16784	9.14714e-05	0.00217099	down	2.66334
ABCA2	-1.58569	4.01448e-07	0.0001898	down	3.7217
SHB	-1.65172	5.59587e-06	0.000583172	down	3.2342
ZFAND5	-0.734665	0.00045215	0.00494247	down	2.30606
ATRNL1	-1.2008	0.000524693	0.00540456	down	2.26724
RAB11FIP2	-0.585074	0.00503891	0.0232772	down	1.63307
CUBN	-0.906935	0.000972993	0.00770387	down	2.11329
UNC5B	-7.55288	1.07828e-08	3.05276e-05	down	4.51531
CCSER2	-0.886813	0.00164507	0.0108492	down	1.9646
BMPR1A	-1.76943	0.000143854	0.00269873	down	2.56884
SFXN3	-0.916686	0.00323288	0.0171537	down	1.76564
KAZALD1	-2.49335	2.85027e-05	0.00127308	down	2.89515
PITX3	-3.1094	0.00014139	0.00268141	down	2.57164
ARHGAP21	-0.803212	0.00780131	0.0315493	down	1.50101
SUFU	-0.712598	0.000424457	0.00478591	down	2.32004
SH3PXD2A	-1.46674	0.000290242	0.0039296	down	2.40565
MAP3K8	-1.93278	1.6614e-05	0.000994305	down	3.00248
DNAJC12	-2.00422	5.82042e-05	0.0017849	down	2.74839
FBXL20	-0.749053	6.57741e-05	0.00187826	down	2.72624
SEPTIN4	-1.06354	0.000344905	0.00432332	down	2.36418
CDK5RAP3	-0.684081	0.00967134	0.0368448	down	1.43362
HOXB6	-0.803637	0.00604741	0.0263443	down	1.57931
RASD1	-0.683407	0.00332336	0.017502	down	1.75691
LGALS3BP	-0.588251	0.00419181	0.0204362	down	1.6896
DHX58	-0.725035	0.0055605	0.0248883	down	1.60401
COL1A1	-6.72862	5.51718e-08	7.80996e-05	down	4.10735
VAT1	-1.0048	3.91287e-05	0.00145753	down	2.83638
MPP2	-0.876989	0.000681392	0.00620187	down	2.20748
DUSP3	-0.682648	0.000220642	0.00337138	down	2.47219
VTN	-0.775561	0.00550307	0.0247182	down	1.60698
TNFAIP1	-0.827338	0.00513294	0.0236216	down	1.62669
IFT20	-0.721377	0.000616482	0.00587942	down	2.23067
SLAIN2	-1.34175	0.0106995	0.0396636	down	1.40161
CLCN3	-0.913233	3.88349e-05	0.00145571	down	2.83693
TRIM2	-0.792099	0.00501936	0.0232171	down	1.63419
TBC1D19	-0.733695	0.000914367	0.00745104	down	2.12778
NKX3-2	-0.97343	0.00274462	0.015219	down	1.81761
KLHL5	-0.931765	0.000640707	0.00601208	down	2.22097
CRYAB	-7.85689	4.96774e-05	0.0016571	down	2.78065
JHY	-1.07725	0.000334422	0.00425494	down	2.37111
LPXN	-0.784483	0.00286981	0.0157288	down	1.80331
ST3GAL4	-1.1151	0.000130207	0.00255743	down	2.5922
FOLR1	-3.68907	1.50553e-06	0.000327875	down	3.48429
ARHGEF17	-1.38756	0.000568415	0.00564089	down	2.24865
BIRC2	-1.01371	0.000440019	0.00487985	down	2.31159
HIPK3	-1.22961	0.000146925	0.00274352	down	2.56169
MADD	-0.923082	4.28122e-05	0.00151509	down	2.81956
SLC22A18	-0.610678	0.00212844	0.0128956	down	1.88956
CD81	-1.18791	2.69489e-05	0.00124493	down	2.90486
PITPNM1	-0.774323	0.00046265	0.00500754	down	2.30038
PPFIBP1	-1.16257	0.00271113	0.0151004	down	1.82101
PRPF40B	-0.643792	0.00069971	0.00632612	down	2.19886
SELPLG	-1.11	0.011612	0.0420152	down	1.37659
CAPRIN2	-1.2161	0.00035079	0.00436587	down	2.35993
TSPAN11	-3.86314	0.000235983	0.0034953	down	2.45652
TNS2	-0.888798	0.000721419	0.0064605	down	2.18973
ELK3	-1.69882	0.000388112	0.00458653	down	2.33852
TRPV4	-1.30568	0.000456608	0.00497387	down	2.30331
CDK2AP1	-0.813628	4.11788e-05	0.00148109	down	2.82942
OAS2	-1.49499	0.00121051	0.00884027	down	2.05353
ENDOU	-0.957153	0.0103682	0.0387764	down	1.41143
VDR	-0.951995	0.0123936	0.0441837	down	1.35474
TBC1D30	-0.604819	0.0069287	0.0290487	down	1.53687
BLTP3B	-1.8343	1.01297e-06	0.000275001	down	3.56067
ING4	-0.832361	0.000296482	0.00397543	down	2.40062
GNPTAB	-0.721154	0.000296182	0.0039741	down	2.40076
HCFC2	-0.910027	0.000103361	0.00230678	down	2.63699
ST8SIA1	-0.848437	0.000447834	0.00492049	down	2.30799
BTN3A3	-0.646757	0.00652071	0.027717	down	1.55725
DSE	-0.609751	0.0111388	0.040834	down	1.38898
MAN1A1	-2.71804	0.00181218	0.0116001	down	1.93554
GABRR2	-1.38704	0.000234892	0.00348752	down	2.45748
SERINC1	-1.16245	2.48536e-05	0.0011906	down	2.92423
NCOA7	-1.88248	0.00742301	0.0305016	down	1.51568
PPARD	-0.683307	0.000110864	0.00235994	down	2.6271
RAB23	-0.633868	0.00102948	0.0079603	down	2.09907
TRIM38	-1.09097	0.00038019	0.00455328	down	2.34168
HECA	-1.84066	8.45498e-06	0.000731633	down	3.13571
ADGRG6	-2.4836	0.000155029	0.00282637	down	2.54877
PHACTR2	-1.28594	0.000636396	0.00598581	down	2.22288
PACRG	-0.627548	0.0126064	0.0447649	down	1.34906
PDE10A	-0.648443	0.00186719	0.0118428	down	1.92655
LINC00473	-0.648443	0.00186719	0.0118428	down	1.92655
PTK7	-0.95313	0.000316346	0.00411374	down	2.38576
TMEM30A	-0.770554	0.00298726	0.0162196	down	1.78996
PCDHB2	-0.624017	0.00263629	0.01483	down	1.82886
LOX	-2.96032	0.00191177	0.0120278	down	1.91981
SPARC	-1.35102	0.000110441	0.00235561	down	2.6279
PCDHB3	-0.639121	0.000339355	0.00428912	down	2.36763
PCDHB6	-0.770545	0.0106978	0.0396636	down	1.40161
PCDHB7	-1.2628	0.00010406	0.00230739	down	2.63688
CLK4	-0.70231	0.011349	0.0413675	down	1.38334
ARSB	-0.601957	0.000109332	0.00235275	down	2.62843
ARRDC3	-2.28835	5.42914e-05	0.00174965	down	2.75705
GOLPH3	-0.589664	0.000748308	0.00660872	down	2.17988
FAM172A	-0.714566	0.0027135	0.0151004	down	1.82101
SLC27A6	-1.01457	0.00019745	0.00319044	down	2.49615
NR3C1	-1.47521	0.000332518	0.00424057	down	2.37258
C5orf15	-0.80555	8.79058e-05	0.0021463	down	2.66831
PDGFRB	-1.47982	0.000117638	0.00244598	down	2.61155
ATP6V0E1	-1.29592	2.72239e-05	0.00124711	down	2.90409
STC2	-0.708339	0.00434554	0.0209816	down	1.67816
CPEB4	-0.944157	6.22158e-05	0.00183203	down	2.73707
FAM162A	-1.17507	0.0134688	0.0470019	down	1.32788
COL7A1	-2.33459	0.000135644	0.00262263	down	2.58126
ABTB1	-1.66623	0.000127415	0.00254968	down	2.59351
PLSCR4	-2.0658	2.40376e-06	0.000400318	down	3.3976
GORASP1	-0.956129	9.64417e-05	0.00223806	down	2.65013
ABHD14B	-0.925078	2.96722e-05	0.00128283	down	2.89183
KLHL24	-1.48827	6.56775e-05	0.00187821	down	2.72626
TNNC1	-0.793507	0.00655864	0.0277971	down	1.556
KCNIP3	-1.27143	1.54346e-05	0.000961898	down	3.01687
ACVR1	-1.28082	4.59167e-05	0.00156892	down	2.8044
APC2	-1.60012	0.000296177	0.0039741	down	2.40076
FN1	-3.03879	1.99879e-06	0.000388353	down	3.41077
IGFBP5	-4.08483	0.000127754	0.00254968	down	2.59351
EFHD1	-2.83965	5.14021e-05	0.00168657	down	2.773
COQ10B	-0.71875	0.00258482	0.0146193	down	1.83507
KDM3A	-0.713915	2.94841e-05	0.00128263	down	2.8919
PLCD4	-1.65167	0.00313363	0.0168071	down	1.77451
IL1R1	-2.25463	0.00043779	0.00486057	down	2.31331
PROC	-1.16161	0.00699206	0.02924	down	1.53402
ID2	-2.91449	2.50445e-05	0.00119598	down	2.92228
SLC25A12	-0.813671	0.00201141	0.0124164	down	1.90601
RMDN2	-1.15691	7.16312e-05	0.00194464	down	2.71116
DLX2	-6.03156	8.6147e-09	3.05276e-05	down	4.51531
ARID3A	-1.34401	0.00129596	0.00923197	down	2.03471
EPHA4	-0.933192	0.0131463	0.0461058	down	1.33624
PRRX1	-2.12587	0.000717438	0.00643357	down	2.19155
SCP2	-0.627677	0.000325005	0.00416892	down	2.37998
ANGPTL1	-1.52151	0.00335312	0.0175986	down	1.75452
TMEM59	-1.13224	1.26236e-06	0.000312717	down	3.50485
CHD5	-3.39531	2.41853e-05	0.0011864	down	2.92577
QSOX1	-0.692415	0.00120359	0.00880174	down	2.05543
ERRFI1	-3.58945	0.00101903	0.00792275	down	2.10112
ELAPOR1	-1.41547	0.010409	0.0388754	down	1.41033
MEF2D	-0.990494	0.000492729	0.00520794	down	2.28333
FBXO2	-1.99615	0.0069017	0.0289538	down	1.53829
FBXO6	-1.51418	0.000460538	0.00500329	down	2.30074
DNAJC6	-0.617153	0.00243543	0.0140715	down	1.85166
NCF2	-0.917249	0.0109382	0.0402998	down	1.3947
PLEKHM2	-0.645813	1.25857e-05	0.000882857	down	3.05411
CD58	-1.28784	9.9878e-06	0.000799081	down	3.09741
OSCP1	-0.607749	0.000357378	0.00441278	down	2.35529
RLF	-0.594562	4.39634e-05	0.00153392	down	2.8142
AKT3	-0.871117	0.000612509	0.00585845	down	2.23222
ETV3	-0.872346	0.000586683	0.0057308	down	2.24178
MFAP2	-0.755472	0.0110216	0.0405394	down	1.39212
KDM5B	-0.591838	0.0028635	0.0157068	down	1.80391
CTBS	-1.27406	0.000207656	0.00328392	down	2.48361
CDK18	-1.28523	0.000128597	0.00255364	down	2.59284
HMGCL	-0.627289	0.000672398	0.00616402	down	2.21014
ID3	-5.42202	0.000811658	0.0069155	down	2.16018
IPO13	-0.76855	0.000208456	0.00328392	down	2.48361
F3	-4.54996	4.03404e-05	0.00146722	down	2.83351
TNFSF4	-1.62191	0.00024916	0.00360618	down	2.44295
PLPPR4	-0.830374	0.00145257	0.00995746	down	2.00185
SERPINC1	-0.687881	0.0143393	0.0491909	down	1.30812
RSRP1	-0.796662	0.00195211	0.0121925	down	1.91391
MTARC2	-0.843975	0.00228879	0.0135118	down	1.86929
CTSD	-0.637431	0.00203817	0.0125021	down	1.90302
NRP2	-2.95737	0.000395543	0.00464527	down	2.33299
KLF7	-0.831692	0.000652714	0.00605878	down	2.21761
C1orf54	-1.87534	2.35995e-05	0.00117292	down	2.93073
USP35	-0.652259	0.000589129	0.0057308	down	2.24178
CNR1	-0.9864	0.00381749	0.0191386	down	1.71809
SGK1	-4.7725	0.000195003	0.0031819	down	2.49731
FOXO3	-0.727236	0.000555932	0.00556437	down	2.25458
STBD1	-1.8196	0.000444782	0.00490894	down	2.30901
MFSD1	-0.801644	8.4719e-05	0.00212258	down	2.67314
HS1BP3	-0.589798	0.00652561	0.0277282	down	1.55708
KLF9	-1.58474	2.68311e-05	0.00124238	down	2.90575
TJP2	-2.64331	1.95313e-07	0.000124862	down	3.90357
PGF	-7.76916	5.15441e-09	2.55375e-05	down	4.59282
IFI27L2	-1.69062	0.0106539	0.0395541	down	1.40281
BBOF1	-0.837676	0.000114179	0.00240467	down	2.61894
ACYP1	-0.667185	9.56589e-05	0.0022277	down	2.65214
FLVCR2	-2.07396	0.00414233	0.0202698	down	1.69315
TGFB3	-1.4374	0.00792382	0.0319175	down	1.49597
EIF2B2	-1.34791	6.89259e-05	0.00189982	down	2.72129
FKBP1B	-1.09951	0.00139297	0.00966256	down	2.01491
YPEL5	-1.57907	0.000347613	0.00434089	down	2.36242
YIPF4	-0.613729	0.00221972	0.0132262	down	1.87856
ELOVL3	-1.63953	0.000144279	0.00270258	down	2.56822
IFIT3	-1.57059	0.0133591	0.0467181	down	1.33052
IFIT2	-1.41573	0.0139829	0.0483305	down	1.31578
PPP1R3C	-2.24333	0.00626489	0.0270019	down	1.56861
CYSTM1	-1.1482	0.000153188	0.00281273	down	2.55087
PCDHB8	-0.968914	0.00156881	0.0105184	down	1.97805
PCDHB10	-1.57736	7.35957e-05	0.00195661	down	2.7085
PCDHB14	-0.634684	0.000674204	0.00616999	down	2.20972
PCDHB12	-1.04523	0.00318922	0.0170132	down	1.76921
TNFSF18	-3.92762	0.000168998	0.00295866	down	2.52891
ENOX1	-1.69707	0.0012861	0.00919808	down	2.0363
ELF1	-0.869545	2.87283e-05	0.00127308	down	2.89515
SMAD9	-4.90951	4.5107e-06	0.000538513	down	3.2688
EGR1	-1.1765	0.0091978	0.0354427	down	1.45047
GLT8D2	-1.00228	0.000282808	0.00387065	down	2.41222
SCPEP1	-1.68724	1.95744e-05	0.0010599	down	2.97473
TBX2	-5.06729	4.49372e-05	0.0015533	down	2.80875
FAM117A	-1.60633	0.00905764	0.0350389	down	1.45545
ADCY7	-1.73687	3.40515e-05	0.00138444	down	2.85873
PDZRN3	-3.71677	8.86975e-07	0.000266334	down	3.57457
CRY2	-0.723276	0.000390236	0.00460065	down	2.33718
UBL3	-1.27554	0.00273762	0.0151972	down	1.81824
XPNPEP2	-0.600276	0.00788168	0.0317866	down	1.49776
LDB3	-0.912527	0.00219898	0.0131512	down	1.88103
PRXL2A	-0.601434	0.0111607	0.0408917	down	1.38836
ODF2L	-0.623021	0.00364848	0.018577	down	1.73102
RAMP3	-0.611718	0.00763068	0.031095	down	1.50731
DNAI1	-0.932998	0.000155439	0.00282637	down	2.54877
CALD1	-1.21682	0.00327709	0.0173072	down	1.76177
CHST3	-0.610983	0.000729	0.00649318	down	2.18754
EGR2	-2.15337	2.37997e-05	0.00117916	down	2.92843
P4HA1	-0.858956	0.00657589	0.0278642	down	1.55495
RNF11	-0.829025	0.00398643	0.0196966	down	1.70561
NECAB1	-0.613589	0.0017536	0.0113386	down	1.94544
ADGRE5	-0.705545	0.00877128	0.0341919	down	1.46608
OPTN	-1.09925	0.00178931	0.0114977	down	1.93939
HOXC13	-3.84719	0.000415112	0.00475257	down	2.32307
HOXC11	-2.46097	1.80252e-06	0.000368272	down	3.43383
SARDH	-1.29222	0.00184023	0.0117397	down	1.93034
PLP1	-2.28424	0.000214865	0.00333669	down	2.47668
PFKFB2	-1.56151	2.24018e-05	0.00114175	down	2.94243
MXD4	-1.41409	1.4827e-05	0.00093879	down	3.02743
CHPF	-0.885546	0.00536825	0.024284	down	1.61468
SNX21	-0.798481	3.06092e-06	0.000452697	down	3.34419
EDN3	-4.93585	0.000135075	0.00261929	down	2.58182
RAB22A	-0.615533	0.000669794	0.00615124	down	2.21104
PTGIS	-0.923903	0.000746146	0.00660434	down	2.18017
SNAI1	-4.74713	7.87603e-06	0.000715362	down	3.14547
STX16	-0.684195	0.00300076	0.016275	down	1.78848
PMEPA1	-2.55752	6.08516e-05	0.0018162	down	2.74084
CHST8	-1.7581	0.000947067	0.0075773	down	2.12049
IQSEC2	-0.846058	0.000105855	0.00232318	down	2.63392
ABCC10	-0.650394	0.000257656	0.00366881	down	2.43547
PEX6	-0.668175	0.00388089	0.0193537	down	1.71324
CPNE5	-1.9619	0.00275411	0.015252	down	1.81667
ATXN1	-0.650307	0.0097685	0.0371008	down	1.43062
RUNX2	-2.53534	0.00417872	0.0203925	down	1.69053
AHNAK	-1.51303	0.00157969	0.0105657	down	1.9761
SH3TC1	-1.2658	0.00402612	0.0198432	down	1.70239
TM9SF2	-0.600001	0.00239625	0.0139223	down	1.85629
MBOAT7	-1.28171	0.0033457	0.0175782	down	1.75502
FNDC11	-0.868385	0.00268477	0.0150344	down	1.82291
PSPN	-0.63505	0.000449305	0.00492496	down	2.3076
GRIA3	-2.34293	0.0103889	0.0388392	down	1.41073
TRIP10	-0.612855	0.000421938	0.00478591	down	2.32004
RTN2	-0.671368	0.00765418	0.0311543	down	1.50648
EML2	-1.96681	3.23204e-05	0.00134823	down	2.87024
SDCBP2	-0.7616	0.00326478	0.0172814	down	1.76242
BFSP1	-1.40522	7.90391e-05	0.00205564	down	2.68705
DSTN	-0.803039	0.000106899	0.00233573	down	2.63158
LAMP5	-4.11468	0.00373814	0.0188638	down	1.72437
NECAB3	-0.839612	0.00167387	0.0110026	down	1.95851
ID1	-7.05827	6.81402e-05	0.00189304	down	2.72284
MMP24OS	-0.917951	1.39812e-05	0.000931987	down	3.03059
THRA	-0.88224	0.00111202	0.00835409	down	2.0781
NR1D1	-1.18143	0.000296161	0.0039741	down	2.40076
FRMD8	-0.737268	0.00142215	0.00980318	down	2.00863
PRRG2	-1.00039	0.0121749	0.043571	down	1.3608
SBDS	-0.705322	0.00427306	0.0207162	down	1.68369
AHDC1	-0.646036	0.00171946	0.0111689	down	1.95199
HSPA2	-1.38589	0.0016413	0.0108425	down	1.96487
ZBTB1	-0.697605	0.000424102	0.00478591	down	2.32004
EVI2A	-1.65239	0.0057295	0.0253397	down	1.5962
SLC10A3	-0.88844	0.00047272	0.00506946	down	2.29504
ARMCX1	-1.00439	0.000436241	0.00485446	down	2.31386
IDUA	-0.9695	0.000306032	0.00405109	down	2.39243
TMEM175	-1.31633	4.71018e-06	0.000549096	down	3.26035
ZFP36	-1.10191	0.0105385	0.0392137	down	1.40656
SRD5A3	-0.654117	0.00137842	0.00961548	down	2.01703
RASL11B	-4.08869	0.00414754	0.0202853	down	1.69282
MCHR1	-1.43856	0.0141968	0.0488375	down	1.31125
FLNC	-1.98151	0.00241312	0.0139793	down	1.85452
HOXD10	-0.616214	0.00252073	0.0144048	down	1.84149
HOXD11	-0.629282	0.000210637	0.00330515	down	2.48081
ISLR	-5.53504	3.6614e-05	0.00143739	down	2.84243
SUMF2	-0.622089	2.86266e-05	0.00127308	down	2.89515
SPCS3	-0.720584	0.00309144	0.0166394	down	1.77886
DNAAF11	-1.12443	7.40847e-05	0.00195761	down	2.70827
MTUS1	-1.20804	0.0131124	0.0460259	down	1.337
HEATR5A	-0.945686	6.45274e-05	0.00186416	down	2.72952
EGLN3	-2.23806	3.57937e-05	0.00141872	down	2.8481
TEP1	-1.11997	1.00132e-05	0.000799081	down	3.09741
ITFG1	-0.619618	0.00022324	0.00339026	down	2.46977
ARHGEF6	-0.800475	0.0113379	0.0413374	down	1.38366
PLPPR3	-3.64994	0.000650697	0.00605878	down	2.21761
STARD8	-1.21046	0.000653994	0.00606113	down	2.21745
SAT1	-3.59265	1.12088e-07	0.000102724	down	3.98833
APOE	-4.94996	1.0022e-06	0.000275001	down	3.56067
ATP8B3	-1.34966	3.40141e-06	0.000464891	down	3.33265
NCAN	-6.54707	0.000384049	0.00457377	down	2.33973
BST2	-1.66237	0.000317165	0.00412168	down	2.38493
RSPH3	-1.15245	6.69513e-05	0.00188105	down	2.7256
MLLT1	-1.23931	0.00533809	0.024236	down	1.61554
HRC	-1.76725	0.0116213	0.0420277	down	1.37646
TRPM4	-1.13392	6.53481e-05	0.00187149	down	2.72781
OLFM1	-2.34977	0.00271209	0.0151004	down	1.82101
ZBTB46	-2.59172	0.000214363	0.00333669	down	2.47668
PNPLA7	-1.10346	0.0100473	0.0378042	down	1.42246
ASS1	-2.64659	0.00500181	0.0231891	down	1.63472
FIBCD1	-3.73516	1.66621e-05	0.000994305	down	3.00248
NPAS1	-5.71303	1.19218e-07	0.000102724	down	3.98833
MAP3K10	-0.599175	0.00282934	0.0155798	down	1.80744
SMPDL3B	-0.999459	0.00997018	0.0375873	down	1.42496
THEMIS2	-0.75548	0.00217185	0.0130548	down	1.88423
ANGPTL6	-0.610008	0.00875604	0.0341919	down	1.46608
SLC6A8	-0.733614	0.00820549	0.0326211	down	1.4865
CASZ1	-0.917776	0.000101361	0.00228724	down	2.64069
HABP4	-1.08588	8.6092e-07	0.000262488	down	3.58089
ULBP2	-1.84348	0.00128707	0.00920103	down	2.03616
SYNE1	-1.04725	0.00200149	0.0123882	down	1.90699
C1QL1	-1.829	0.002826	0.0155701	down	1.80771
GFAP	-4.61908	9.10444e-07	0.000269301	down	3.56976
GSE1	-2.49184	0.00403933	0.0198858	down	1.70146
SH3BGRL	-1.71967	0.00424047	0.0205873	down	1.6864
NFATC1	-1.24852	0.00268571	0.0150354	down	1.82289
SLC6A6	-2.80042	1.79695e-05	0.00102628	down	2.98873
KCNC3	-1.99341	0.00039895	0.00467005	down	2.33068
NR1H2	-0.734764	0.000362749	0.00444311	down	2.35231
GFPT2	-1.70957	0.000207378	0.00328392	down	2.48361
NDFIP1	-0.621041	0.0111928	0.0409712	down	1.38752
NINJ1	-1.29577	0.000109804	0.00235561	down	2.6279
IL13RA1	-1.38915	0.00456481	0.0217517	down	1.66251
WDR44	-0.608159	0.000312453	0.00408996	down	2.38828
RARA	-1.53918	0.000133849	0.00261085	down	2.58322
RAI2	-2.13889	0.00369778	0.0187376	down	1.72729
PODNL1	-1.14408	0.00164132	0.0108425	down	1.96487
EFR3A	-0.681176	0.00100067	0.00784779	down	2.10525
CARD6	-1.2085	0.000193208	0.00317233	down	2.49862
INPP5K	-0.758614	2.67368e-07	0.000165585	down	3.78098
KDM6B	-1.0205	7.11188e-05	0.00193603	down	2.71309
DLG4	-1.16373	1.10568e-05	0.000826879	down	3.08256
RIN2	-2.40247	0.000182228	0.00309194	down	2.50977
HAPLN2	-3.28255	0.00101591	0.00790843	down	2.10191
SERINC3	-0.768927	1.54179e-05	0.000961898	down	3.01687
MPRIP	-0.98613	1.63492e-06	0.000344689	down	3.46257
SLC41A1	-0.641782	0.000384548	0.00457377	down	2.33973
POSTN	-2.5904	0.00392648	0.0194732	down	1.71056
TBC1D8B	-0.600091	0.0100657	0.037838	down	1.42207
TCEAL4	-0.67715	0.00168345	0.011029	down	1.95746
GSTT2B	-0.600114	0.00244848	0.0141346	down	1.84972
C1QTNF6	-1.39992	0.000487791	0.00516677	down	2.28678
BTG1	-1.33175	0.000101447	0.00228724	down	2.64069
TMTC1	-3.30992	0.000328016	0.00419395	down	2.37738
BMAL1	-1.06364	0.000159239	0.00287504	down	2.54136
DGLUCY	-0.920419	0.000975674	0.00771585	down	2.11262
UNC79	-0.621996	0.00315113	0.0168781	down	1.77268
PEBP4	-1.45099	0.000458671	0.00499126	down	2.30179
CTIF	-1.18876	0.000201398	0.00322661	down	2.49125
MEIS2	-1.34721	0.0011623	0.00858537	down	2.06624
SYT6	-1.06306	0.000155418	0.00282637	down	2.54877
SPIRE1	-0.607489	0.00633688	0.0272122	down	1.56524
SLC38A2	-1.19828	0.00135148	0.00950784	down	2.02192
CMPK2	-1.76424	0.00145537	0.00996978	down	2.00131
FST	-1.79343	0.00299963	0.0162734	down	1.78852
TMEM241	-0.598077	0.0037982	0.0190757	down	1.71952
CABLES1	-1.10363	0.00395807	0.0195949	down	1.70786
EMP1	-2.80051	0.000171755	0.00298657	down	2.52483
SPOCD1	-3.35873	0.000145249	0.00271817	down	2.56572
AGO4	-1.10726	0.000291304	0.00394066	down	2.40443
OSTF1	-0.755794	0.000714807	0.0064242	down	2.19218
ANXA1	-0.925494	0.0119376	0.0428974	down	1.36757
CTSL	-1.61333	0.0030977	0.016664	down	1.77822
OASL	-0.659972	0.00530708	0.0241561	down	1.61697
DTX1	-1.11225	0.000380946	0.00455746	down	2.34128
PNPLA8	-0.661907	0.000280157	0.00384613	down	2.41498
GARIN1B	-1.70017	0.00146223	0.00999672	down	2.00014
ANKRD6	-0.960206	3.23734e-05	0.00134823	down	2.87024
MRAP2	-1.77831	0.0143454	0.0492033	down	1.30801
LCA5	-0.665022	0.00647342	0.0276115	down	1.55891
PRRG4	-1.19501	0.00327752	0.0173072	down	1.76177
PRPH	-1.74125	8.98842e-05	0.00216139	down	2.66527
AVIL	-1.08024	0.000110012	0.00235561	down	2.6279
TSPAN31	-0.762398	0.00199699	0.0123731	down	1.90752
FAIM2	-1.11842	0.00218812	0.0131172	down	1.88216
NMBR	-0.630313	0.000601334	0.0057935	down	2.23706
DYSF	-2.68207	0.0122523	0.0437823	down	1.3587
KIAA0513	-1.51629	1.61297e-07	0.000117041	down	3.93166
FBXL8	-1.90018	4.53816e-06	0.000538546	down	3.26878
SLC9A5	-1.8108	0.000967735	0.00768205	down	2.11452
RNASEL	-1.29236	1.41802e-05	0.000934032	down	3.02964
SERPINE2	-4.0794	7.04097e-05	0.0019232	down	2.71597
TMBIM1	-0.9959	0.000808072	0.00690611	down	2.16077
TMEM127	-0.960891	0.000269275	0.00376074	down	2.42473
ARHGEF4	-1.34871	0.000793946	0.0068203	down	2.1662
LMO7	-1.35154	0.000930382	0.00751027	down	2.12434
ITM2B	-1.66317	0.000129539	0.00255623	down	2.5924
GPNMB	-2.98429	0.0136945	0.047597	down	1.32242
DGKB	-1.2345	3.75687e-05	0.00145033	down	2.83853
NACAD	-0.806958	0.000184376	0.00310971	down	2.50728
MYCBPAP	-0.960983	0.00102235	0.00792762	down	2.10086
KAT7	-1.43382	2.20758e-05	0.00113614	down	2.94457
GALNT5	-0.897217	0.0145508	0.0496845	down	1.30378
TANK	-0.783564	3.74557e-05	0.00145033	down	2.83853
SKIL	-2.38274	1.40907e-06	0.000327875	down	3.48429
RPS6KC1	-0.64403	0.000293035	0.00395597	down	2.40275
DNAJC1	-1.39727	2.16523e-06	0.000391767	down	3.40697
NIPSNAP3A	-0.762647	0.000381283	0.00455746	down	2.34128
KLF4	-2.12626	0.00144122	0.00990365	down	2.0042
ANGPTL2	-0.790378	0.000211397	0.00330907	down	2.48029
USP20	-0.779297	0.000933592	0.00751194	down	2.12425
IL33	-4.24041	0.00205842	0.0125865	down	1.90009
IL11RA	-1.28044	0.000441942	0.0048875	down	2.31091
DNAJB5	-0.965756	0.00112299	0.00838562	down	2.07646
SPAG8	-0.596542	0.00279761	0.0154438	down	1.81125
TFAP2A	-2.61876	0.000951031	0.00759369	down	2.11955
TMEM63B	-0.630702	0.000650075	0.00605878	down	2.21761
FAM8A1	-1.0022	0.00143617	0.00987577	down	2.00543
FGFBP2	-0.910575	0.000230997	0.00346811	down	2.45991
FHDC1	-0.904909	0.00171729	0.0111662	down	1.95209
ANKRD42	-1.6015	0.00579648	0.025596	down	1.59183
RAB30	-1.63939	0.000218452	0.0033561	down	2.47416
PRCP	-1.17212	0.00874608	0.0341874	down	1.46613
ITGA11	-2.732	0.000568754	0.00564142	down	2.24861
SMAD6	-6.17141	2.79512e-05	0.0012705	down	2.89603
ADAM10	-0.884461	0.000413289	0.00474564	down	2.32371
STRA6	-3.485	0.00235914	0.013751	down	1.86166
SEMA6D	-1.03753	0.0116184	0.0420246	down	1.3765
GTF2B	-0.812099	0.0089996	0.034862	down	1.45765
IFI44	-0.803907	0.0106252	0.0394695	down	1.40374
CYP1B1	-0.906811	0.000906352	0.00740704	down	2.13036
EMILIN1	-1.95234	0.00721215	0.0298557	down	1.52497
MYOF	-1.51492	0.000730455	0.00650029	down	2.18707
CALHM2	-1.65412	0.00371969	0.0188153	down	1.72549
ZNF365	-0.969366	0.0013835	0.00962781	down	2.01647
ITPRID2	-0.729706	0.00602124	0.0262781	down	1.58041
ITGAV	-2.30146	0.00223361	0.0132691	down	1.87716
SLC40A1	-0.634931	0.003455	0.017962	down	1.74564
SECISBP2L	-1.03512	0.000108633	0.00234307	down	2.63022
ARHGAP24	-1.2873	0.00389584	0.0193781	down	1.71269
SCARB2	-1.10982	0.000700666	0.00633187	down	2.19847
CCNG2	-0.970896	0.000823159	0.00695963	down	2.15741
LEF1	-1.16371	0.000538539	0.00546567	down	2.26236
FBN2	-2.17021	0.000370516	0.00449923	down	2.34686
RGS3	-0.892068	0.00517849	0.0237563	down	1.62422
B4GALNT3	-2.6873	4.0224e-07	0.0001898	down	3.7217
GABARAPL1	-1.63745	0.000454332	0.00496359	down	2.3042
C1RL	-1.36207	0.000444874	0.00490894	down	2.30901
VAMP1	-0.882075	0.00624847	0.026955	down	1.56936
GLIPR1	-0.976857	0.000412773	0.00474564	down	2.32371
DHH	-3.17981	0.00142026	0.00979355	down	2.00906
ACVRL1	-1.76176	0.00321022	0.0170884	down	1.7673
ITGB7	-0.899851	0.000183905	0.00310971	down	2.50728
CSAD	-1.59183	6.95714e-05	0.00191495	down	2.71784
WDFY2	-1.20983	9.36292e-06	0.000765059	down	3.11631
MBNL2	-0.957116	0.00129671	0.00923399	down	2.03461
CBLN3	-0.610064	0.0109916	0.0404592	down	1.39298
FRMD6	-1.50537	5.86058e-05	0.00178742	down	2.74777
PELI2	-1.0638	0.00235516	0.0137495	down	1.86171
RTN1	-1.04556	0.0144365	0.0493877	down	1.30638
WARS1	-0.619817	0.000475436	0.00508208	down	2.29396
SERF2	-0.657094	0.00128508	0.00919808	down	2.0363
TLE3	-0.719512	0.000445918	0.00490956	down	2.30896
BCL2A1	-3.12714	0.00737357	0.0303425	down	1.51795
TPM1	-1.71183	0.000137435	0.00263412	down	2.57936
HAPLN3	-1.08137	0.0125736	0.0446805	down	1.34988
FURIN	-2.09223	4.16344e-05	0.00148937	down	2.827
CLEC18B	-1.60362	0.0104576	0.0390013	down	1.40892
NOL3	-1.54216	0.000136863	0.00263412	down	2.57936
GAS8	-0.912471	0.000113401	0.00239083	down	2.62145
ZNF287	-0.662892	8.31957e-08	9.69866e-05	down	4.01329
KSR1	-0.750322	0.00376009	0.0189564	down	1.72224
PCTP	-0.701526	0.000422888	0.00478591	down	2.32004
SCRN2	-0.775253	0.0025235	0.0144123	down	1.84127
ABCA8	-1.89494	0.000217752	0.0033561	down	2.47416
BCAS3	-1.08529	1.07392e-05	0.000818578	down	3.08694
GALNT1	-0.624404	0.00140739	0.00973904	down	2.01148
GAREM1	-1.67567	0.00328515	0.0173337	down	1.76111
TMC6	-1.29171	0.00533723	0.024236	down	1.61554
SLC16A3	-1.33373	0.000462611	0.00500754	down	2.30038
RAB40B	-1.22027	0.00053224	0.00544808	down	2.26376
ERBB2	-0.602428	0.00829418	0.0328485	down	1.48348
COL6A2	-1.28192	0.000376052	0.00451946	down	2.34491
APP	-0.650508	0.00373983	0.0188638	down	1.72437
LMTK3	-1.61335	1.53046e-07	0.000117041	down	3.93166
ADAMTS10	-2.5036	0.000500106	0.00525381	down	2.27953
MYO1F	-0.693552	0.00643217	0.0274904	down	1.56082
CACNG8	-1.42576	0.00117848	0.00865644	down	2.06266
ARHGEF19	-1.7832	0.000110205	0.00235561	down	2.6279
SH3BGRL3	-0.659359	0.00147788	0.0100787	down	1.9966
EVA1B	-0.615753	0.0026057	0.014708	down	1.83245
HSPG2	-1.81686	0.000296137	0.0039741	down	2.40076
BCL10	-0.676203	0.00118297	0.00867977	down	2.06149
AZIN2	-1.46729	0.00270661	0.0151004	down	1.82101
SLC44A3	-1.30601	0.00590177	0.0259223	down	1.58633
ATP1B1	-1.40518	0.00151285	0.0102397	down	1.98971
TBX19	-1.183	0.00123802	0.0089818	down	2.04664
CASQ1	-3.34789	0.000235669	0.00349325	down	2.45677
ABL2	-1.18089	0.000584924	0.00573077	down	2.24179
RGS16	-1.66623	0.00948881	0.0362959	down	1.44014
RGL1	-0.6395	0.000699208	0.00632447	down	2.19898
ECM1	-1.44339	0.000373155	0.00450401	down	2.3464
ADAMTSL4	-1.34347	0.00755487	0.030877	down	1.51037
CTSK	-1.39328	6.16555e-05	0.00182644	down	2.73839
SELENBP1	-3.15363	0.000165668	0.00292417	down	2.534
DYRK3	-1.83842	1.11602e-06	0.000291016	down	3.53608
HHIPL2	-5.10904	2.44583e-06	0.000403929	down	3.39369
ATP8B2	-0.700078	0.00254107	0.0144751	down	1.83938
RIT1	-1.32921	9.00851e-05	0.00216139	down	2.66527
MBOAT2	-0.904594	0.000285128	0.00387796	down	2.4114
WNT9A	-1.67637	0.000491996	0.00520298	down	2.28375
EPHX1	-0.985012	0.00493931	0.0229995	down	1.63828
PPFIA4	-1.71283	0.000837433	0.00703827	down	2.15253
PLEKHA6	-3.19262	1.05028e-07	0.000102724	down	3.98833
WDPCP	-0.710555	0.00935472	0.0359016	down	1.44489
DLX1	-3.55797	0.000351122	0.00436587	down	2.35993
FAM171B	-1.14207	0.00919051	0.0354284	down	1.45065
NBEAL1	-0.960853	3.63345e-05	0.00143156	down	2.84419
GRIP2	-3.77447	2.6666e-05	0.00124147	down	2.90606
CSRNP1	-2.04821	0.00106033	0.00810086	down	2.09147
IQSEC1	-2.09484	0.000588286	0.0057308	down	2.24178
PTPRG	-0.600609	0.00194864	0.0121747	down	1.91454
ARL6IP5	-0.893794	0.0139616	0.0482881	down	1.31616
TMEM108	-1.15631	0.000724603	0.00647146	down	2.189
NCEH1	-1.10256	0.00112038	0.00838213	down	2.07665
TBCK	-0.657478	0.00287429	0.0157399	down	1.803
PAM	-1.69487	5.49104e-05	0.00175203	down	2.75646
YIPF5	-0.677572	0.000163633	0.00291157	down	2.53587
RNF145	-1.21809	0.000129671	0.00255623	down	2.5924
KCNMB1	-1.31339	0.00229661	0.0135499	down	1.86806
PSD2	-2.98617	0.00690001	0.0289529	down	1.53831
PPP1R18	-1.07934	0.001122	0.00838213	down	2.07665
LOC107987457	-1.07934	0.001122	0.00838213	down	2.07665
SCUBE3	-1.70008	0.00134926	0.00949559	down	2.02248
PNRC1	-1.85187	5.50597e-05	0.00175203	down	2.75646
ABRACL	-1.94587	3.35489e-06	0.000464891	down	3.33265
SLC2A12	-2.48486	3.78091e-05	0.00145033	down	2.83853
TMEM140	-2.35863	2.31288e-06	0.000391767	down	3.40697
SYTL5	-2.20142	0.00051171	0.00532339	down	2.27381
BIN3	-0.935246	2.87788e-05	0.00127308	down	2.89515
LRP12	-0.821722	0.00133303	0.00941483	down	2.02619
VLDLR	-1.57164	0.00478904	0.0225117	down	1.64759
AOPEP	-0.901901	0.00389123	0.019369	down	1.71289
SNX30	-1.2971	0.00292715	0.0159676	down	1.79676
GSN	-1.2933	0.00847804	0.0333965	down	1.4763
ALAD	-0.724576	0.000128027	0.00255	down	2.59346
ASB6	-1.06862	3.20311e-05	0.00134462	down	2.8714
PTGES	-5.01072	2.83528e-06	0.000434908	down	3.3616
RSU1	-0.943607	3.97565e-05	0.00146721	down	2.83351
HERC4	-0.640774	0.0032553	0.017245	down	1.76334
ANKRD1	-2.74255	0.00407174	0.0199837	down	1.69933
TNKS1BP1	-0.670162	0.00847273	0.0333905	down	1.47638
CAPN5	-1.24294	0.000209595	0.0032914	down	2.48262
GRIK4	-1.18707	0.00797026	0.0320135	down	1.49467
ROM1	-1.97517	3.8751e-06	0.000502534	down	3.29883
EML3	-1.28259	0.000302745	0.00402401	down	2.39534
SIDT2	-1.68923	6.56506e-06	0.000640918	down	3.1932
TAGLN	-3.07122	8.69734e-05	0.0021463	down	2.66831
C20orf144	-0.649542	0.00255349	0.0145166	down	1.83813
KIAA1755	-1.21539	0.00645961	0.0275779	down	1.55944
ARID5B	-2.51567	3.52747e-05	0.00140659	down	2.85183
LATS2	-0.610608	0.00663054	0.0280376	down	1.55226
PDCD4	-1.6676	1.18872e-05	0.000862929	down	3.06402
DIXDC1	-2.02502	1.75711e-05	0.00101228	down	2.9947
PIP4K2A	-1.49367	0.000105845	0.00232318	down	2.63392
CRIM1	-0.720445	0.0021449	0.0129636	down	1.88727
RILPL2	-0.735035	0.00686037	0.0287987	down	1.54063
ITPR1	-2.00957	4.4168e-06	0.00053832	down	3.26896
ENKUR	-0.688131	0.00668977	0.0282051	down	1.54967
TMEM86A	-1.8463	0.000957957	0.00762748	down	2.11762
TMEM263	-0.684337	0.0109114	0.0402162	down	1.3956
PLBD2	-0.617692	0.000384878	0.00457377	down	2.33973
AKAP6	-2.85283	9.49559e-05	0.00221915	down	2.65381
ANKRD50	-0.683908	0.00269542	0.0150685	down	1.82193
CCDC3	-0.972204	0.000549335	0.0055375	down	2.25669
VPS26B	-0.588856	1.94103e-06	0.000388353	down	3.41077
FHIP2A	-1.12244	0.000777248	0.00673928	down	2.17139
WWC2	-0.89448	0.00158546	0.0105881	down	1.97518
AMN1	-0.795744	0.00193942	0.0121286	down	1.91619
BICD1	-0.643779	0.000761209	0.00668097	down	2.17516
SAV1	-1.05979	7.09795e-07	0.000246784	down	3.60768
BEND6	-0.643081	0.00295438	0.0160719	down	1.79393
CCDC74B	-2.93159	8.2171e-05	0.00209854	down	2.67808
HSPB8	-4.12941	1.60148e-07	0.000117041	down	3.93166
CYSLTR2	-1.25296	0.00279619	0.0154402	down	1.81135
SETBP1	-0.921323	0.00420979	0.0204886	down	1.68849
JMY	-0.947622	6.46058e-05	0.00186416	down	2.72952
NMT2	-0.702629	0.000713382	0.00642143	down	2.19237
PLEKHH2	-0.785396	0.00451928	0.0216117	down	1.66531
SPARCL1	-4.58978	0.000171456	0.00298586	down	2.52493
DNAI4	-0.688194	0.000228079	0.00344113	down	2.4633
FARP1	-0.781777	0.0119981	0.0430758	down	1.36577
MR1	-2.02632	1.02952e-05	0.000806325	down	3.09349
CARHSP1	-0.712329	0.000307969	0.00405807	down	2.39168
MERTK	-1.01809	0.0025704	0.0145627	down	1.83676
TMEM87B	-2.00167	9.09589e-06	0.000757248	down	3.12076
RBMS1	-0.797289	8.61288e-05	0.0021463	down	2.66831
SCN3A	-1.54203	1.09552e-05	0.000825356	down	3.08336
NMRAL1	-0.668424	0.00332631	0.0175084	down	1.75675
C16orf89	-0.676857	0.0119255	0.0428618	down	1.36793
FBXL2	-0.953845	7.95038e-05	0.00205962	down	2.68621
CIBAR2	-1.57463	0.00986316	0.0373174	down	1.42809
FBXO36	-0.647756	0.00170426	0.0111029	down	1.95456
KCTD15	-0.899055	0.00324502	0.0172089	down	1.76425
HS2ST1	-0.627416	0.00134433	0.00947097	down	2.02361
GRAP	-1.54713	9.58817e-06	0.000775585	down	3.11037
TBCEL	-0.625183	0.00345645	0.0179624	down	1.74564
ANKH	-3.53322	6.06709e-06	0.000607261	down	3.21662
PITPNC1	-0.988941	0.000545989	0.00551894	down	2.25814
PRKCA	-0.947344	0.00777438	0.031482	down	1.50194
CEP112	-0.72809	1.51496e-05	0.000956161	down	3.01947
TNIK	-0.986185	0.00212979	0.0128998	down	1.88942
FAM167A	-0.878697	0.00387834	0.0193537	down	1.71324
ENAH	-1.30236	7.23497e-05	0.00194813	down	2.71038
SRSF12	-0.789166	0.000498887	0.00524506	down	2.28025
PDE1C	-3.35136	0.000116942	0.00244444	down	2.61182
MPPE1	-0.86815	0.000510941	0.00531819	down	2.27424
KLF10	-1.99214	7.19603e-05	0.00194648	down	2.71075
SLC7A7	-0.731877	0.00935496	0.0359016	down	1.44489
FZD7	-4.04967	7.79265e-05	0.00203204	down	2.69207
CDK20	-0.63316	0.000386815	0.00458213	down	2.33893
NPTN	-1.05701	0.00235777	0.013751	down	1.86166
SAMD8	-1.14341	0.000298729	0.0039948	down	2.3985
FRRS1	-2.3914	0.00207339	0.0126351	down	1.89842
GALK2	-0.59381	0.004255	0.0206428	down	1.68523
NECAP2	-0.638715	0.000586862	0.0057308	down	2.24178
SSBP3	-2.02233	3.19779e-06	0.000460845	down	3.33644
MMP14	-0.799268	0.000896802	0.00735326	down	2.13352
FZD1	-1.91936	9.0444e-05	0.00216215	down	2.66512
CLEC18A	-0.671321	0.0143295	0.0491659	down	1.30834
ST3GAL2	-0.941939	0.000425566	0.00478591	down	2.32004
IL34	-0.892885	0.000397821	0.0046651	down	2.33114
PWWP3B	-0.839135	0.000243126	0.00355118	down	2.44963
TSC22D3	-0.761979	0.000564714	0.00561823	down	2.2504
ETS2	-1.5603	0.000377185	0.0045276	down	2.34413
DGKI	-3.37802	0.00201904	0.0124381	down	1.90525
ACAN	-3.90275	2.47592e-05	0.0011906	down	2.92423
WDR19	-0.693417	0.000675371	0.00617309	down	2.2095
SLC37A3	-1.30262	0.0123878	0.0441709	down	1.35486
SKI	-1.28345	0.000313714	0.00409593	down	2.38765
EXTL1	-1.19141	0.00106447	0.00811057	down	2.09095
DUSP2	-6.29471	9.64213e-06	0.00077678	down	3.1097
TPRG1L	-1.04226	0.00254266	0.01448	down	1.83923
PRXL2C	-0.735031	0.000107636	0.00234019	down	2.63075
MRAS	-1.20277	0.000429983	0.00481918	down	2.31703
SHROOM4	-0.855698	0.00200706	0.0124028	down	1.90648
AHCYL2	-1.08463	0.00106079	0.00810097	down	2.09146
SLC45A3	-1.03671	0.000178826	0.0030737	down	2.51234
PINK1	-1.0648	7.17888e-05	0.00194625	down	2.7108
FHIP2B	-0.761443	4.63031e-05	0.00157669	down	2.80225
CACHD1	-0.943954	0.000795186	0.00682799	down	2.16571
SYNJ1	-0.958289	0.000178427	0.00307216	down	2.51256
CCDC24	-0.828882	0.000573133	0.00566219	down	2.24702
CELF3	-1.92722	0.000820642	0.0069502	down	2.158
ACE	-1.13172	0.000949435	0.00758485	down	2.12005
TPPP3	-1.7618	0.0125639	0.0446542	down	1.35014
ZDHHC1	-1.11071	0.000116565	0.00244444	down	2.61182
ZFYVE28	-0.628383	0.0114095	0.0415191	down	1.38175
CARMIL2	-1.1514	0.000213171	0.00332933	down	2.47764
C16orf86	-1.05068	0.000131369	0.00257514	down	2.5892
ABR	-0.769406	8.33827e-05	0.00210628	down	2.67648
NPR2	-1.01524	0.0110316	0.0405687	down	1.39181
BSDC1	-0.889395	3.47135e-05	0.00139262	down	2.85617
ZBTB8A	-0.595587	0.00117446	0.0086494	down	2.06301
KALRN	-0.893171	0.00966338	0.0368215	down	1.4339
ADAMTS13	-1.25797	6.7975e-05	0.00189304	down	2.72284
GPSM1	-0.810137	0.00455922	0.021746	down	1.66262
ST6GALNAC6	-0.667958	0.00115358	0.00854732	down	2.06817
ZER1	-1.02242	5.31275e-05	0.00172887	down	2.76224
SPTBN4	-1.14738	0.0107698	0.0398274	down	1.39982
TMEM190	-2.23925	0.000933139	0.00751149	down	2.12427
PCSK7	-0.793561	7.31619e-05	0.00195516	down	2.70882
S100A1	-0.762855	0.00405047	0.0199137	down	1.70085
ZBTB7B	-1.00617	5.62588e-07	0.000222988	down	3.65172
SHC1	-0.822583	0.00281749	0.0155318	down	1.80878
PAQR6	-1.81549	0.000570994	0.00564951	down	2.24799
PTH1R	-2.04268	0.00056604	0.00562418	down	2.24994
MYL3	-1.34697	0.000170038	0.00296639	down	2.52777
IER2	-0.623769	0.00462079	0.0219236	down	1.65909
PWWP3A	-0.730635	2.48718e-05	0.0011906	down	2.92423
PGAP3	-0.696166	0.000121405	0.00248297	down	2.60503
CYGB	-1.72354	0.0104913	0.0390968	down	1.40786
CD300LG	-0.705029	0.00220418	0.013176	down	1.88022
NAGS	-0.851958	0.0121777	0.043571	down	1.3608
SHANK1	-0.978178	0.000186063	0.00312162	down	2.50562
PLCD3	-1.17043	0.00271032	0.0151004	down	1.82101
TAMALIN	-2.47852	9.52533e-05	0.00222086	down	2.65348
NTN3	-1.00894	0.00271409	0.0151004	down	1.82101
SHANK2	-0.955707	0.00395795	0.0195949	down	1.70786
GNG3	-1.48679	0.00346546	0.017974	down	1.74536
LBHD1	-0.830909	0.000606809	0.0058269	down	2.23456
ACOT11	-2.16607	6.19805e-08	8.18886e-05	down	4.08678
ZSWIM5	-1.27848	0.000203066	0.00323838	down	2.48967
SLC45A1	-1.16115	0.0029286	0.0159711	down	1.79666
JAK1	-2.21409	0.000847386	0.00709484	down	2.14906
SYNC	-2.00679	8.16915e-05	0.00208898	down	2.68007
MXRA8	-4.00641	1.07494e-09	1.09375e-05	down	4.96108
TM2D1	-0.710587	0.000926536	0.00749509	down	2.12522
DNAJB4	-0.853707	0.0010502	0.00804074	down	2.0947
ARPC5	-0.586742	0.00301482	0.0163201	down	1.78728
KCNJ9	-1.08553	0.00160715	0.0106988	down	1.97066
DDR2	-1.0379	0.0130345	0.0458581	down	1.33858
PEA15	-1.17843	0.000120706	0.00247635	down	2.60619
FCRLB	-1.43345	0.000103699	0.00230739	down	2.63688
SNED1	-2.36283	0.00135199	0.00950806	down	2.02191
KIF26B	-3.21498	0.000753167	0.00662506	down	2.17881
WDR26	-0.758699	2.65303e-05	0.00124147	down	2.90606
TRIM17	-1.74575	3.23284e-06	0.000460845	down	3.33644
RFTN2	-1.15283	0.00977736	0.0371196	down	1.4304
SLC66A3	-1.04059	0.000977407	0.00772647	down	2.11202
FRZB	-2.13285	0.00303873	0.016427	down	1.78444
CCDC74A	-1.61825	9.58232e-05	0.0022289	down	2.65191
EN1	-1.72801	1.37672e-05	0.000927987	down	3.03246
SGCB	-0.773202	0.000167932	0.00295041	down	2.53012
CFAP221	-0.603085	0.000765366	0.00669966	down	2.17395
CTSS	-1.39939	0.000188661	0.00313402	down	2.5039
MSX1	-2.65535	4.49978e-06	0.000538513	down	3.2688
S100A11	-0.74646	0.000106175	0.00232506	down	2.63357
FZD5	-1.02876	0.010779	0.0398466	down	1.39961
DAPL1	-2.41319	0.000808944	0.00691019	down	2.16051
PBXIP1	-1.33623	0.00058528	0.00573077	down	2.24179
COL6A3	-3.41163	0.000836242	0.00703663	down	2.15264
CCKAR	-1.87016	0.0140694	0.048516	down	1.31412
ATP1A1	-1.00097	1.46303e-05	0.000937995	down	3.0278
FSTL1	-1.454	3.90504e-06	0.000502534	down	3.29883
IGFBP7	-3.0559	0.00155337	0.0104568	down	1.9806
TGFBR2	-0.811924	0.0101347	0.0380397	down	1.41976
ANKZF1	-1.03561	0.000151685	0.00279376	down	2.55381
HDAC11	-1.11643	4.51924e-05	0.0015533	down	2.80875
FBLN2	-2.62558	0.0088788	0.0345223	down	1.4619
NFASC	-1.9649	0.000326273	0.00418245	down	2.37857
IFI16	-1.90381	0.00127234	0.00912937	down	2.03956
PRICKLE2	-3.05455	9.97354e-09	3.05276e-05	down	4.51531
ADAMTS9	-1.90755	0.00651765	0.0277123	down	1.55733
RBM47	-1.83308	0.0074763	0.0306634	down	1.51338
UCN	-1.13231	0.00609534	0.0264776	down	1.57712
GRIK3	-3.56419	0.000353279	0.00438016	down	2.35851
ZC3H12A	-1.36901	0.00104633	0.00802604	down	2.0955
PRKCD	-0.591761	0.0142153	0.0488755	down	1.31091
BDH2	-1.00506	0.000433855	0.00484129	down	2.31504
CAMP	-3.10839	0.000187552	0.00312345	down	2.50537
DUSP7	-1.46906	0.00502065	0.0232171	down	1.63419
MAP9	-0.750858	0.000417297	0.0047557	down	2.32279
FBXO8	-0.635971	0.00164895	0.0108665	down	1.96391
ITGA2	-2.48037	8.82018e-05	0.0021463	down	2.66831
RANBP3L	-2.16936	0.000415513	0.00475286	down	2.32305
SLC25A46	-0.698162	0.00271026	0.0151004	down	1.82101
CMYA5	-0.813707	0.0120353	0.043186	down	1.36466
ANKRA2	-0.595081	0.000117032	0.00244444	down	2.61182
CITED2	-1.72983	4.07001e-05	0.00147432	down	2.83141
CREBRF	-1.48583	6.90728e-07	0.000246784	down	3.60768
DCBLD1	-0.652621	0.00157721	0.0105539	down	1.97659
IL31RA	-0.621728	0.00591994	0.0259618	down	1.58567
SLU7	-0.70012	8.92907e-06	0.000753005	down	3.1232
SYTL3	-2.78937	0.000386356	0.00457943	down	2.33919
HEY1	-2.72447	0.000189953	0.00314756	down	2.50203
COL1A2	-2.07499	0.00916581	0.0353814	down	1.45123
CTSB	-1.58199	1.13107e-05	0.000839533	down	3.07596
OSGIN2	-1.97884	2.02772e-05	0.00108316	down	2.96531
OXR1	-1.27534	0.0023591	0.013751	down	1.86166
GPR146	-1.68845	8.75965e-05	0.0021463	down	2.66831
GPER1	-4.02828	0.00164685	0.0108574	down	1.96427
FOXK1	-1.01836	8.85898e-05	0.0021463	down	2.66831
TP53INP1	-1.0139	0.000153282	0.00281273	down	2.55087
GEM	-1.7717	0.00243384	0.0140665	down	1.85182
ABCA1	-3.05502	2.24111e-05	0.00114175	down	2.94243
TMC1	-0.662018	0.00128418	0.00919766	down	2.03632
DYNLT3	-1.47016	0.000790876	0.00680631	down	2.16709
MID1IP1	-0.784852	0.000299516	0.00400257	down	2.39766
PCDH19	-2.29986	0.000416263	0.00475365	down	2.32297
WNK2	-1.5884	2.44083e-05	0.00119032	down	2.92433
ATP7A	-0.780822	0.000214773	0.00333669	down	2.47668
AQP3	-1.89958	0.000463809	0.00501733	down	2.29953
PGM2L1	-2.22778	2.71453e-05	0.00124711	down	2.90409
SLC16A9	-4.69471	0.000242453	0.00355118	down	2.44963
TMEM63C	-0.968771	0.000356937	0.00441101	down	2.35546
ZNF503	-2.73805	0.00200195	0.0123882	down	1.90699
SPACA9	-0.966672	9.1373e-05	0.00217099	down	2.66334
NSMF	-1.06893	2.77813e-05	0.00126568	down	2.89768
PPP1R36	-0.739541	0.00885723	0.0344452	down	1.46287
ZFYVE1	-0.895738	2.27398e-05	0.00115081	down	2.939
SLC39A13	-0.653013	0.00848358	0.033405	down	1.47619
TCP11L2	-1.94443	1.68076e-05	0.000994305	down	3.00248
GPR176	-1.72787	1.8787e-07	0.000124107	down	3.9062
FBN1	-1.47787	0.0140293	0.0484462	down	1.31474
LARP6	-1.02407	1.77981e-05	0.00102238	down	2.99039
CLMP	-3.32597	0.000777043	0.00673928	down	2.17139
FAM227B	-0.608097	0.00191415	0.0120389	down	1.91941
WBP1L	-1.13227	3.66274e-05	0.00143739	down	2.84243
CYP17A1-AS1	-1.13227	3.66274e-05	0.00143739	down	2.84243
TMEM100	-4.28525	0.000408436	0.00473225	down	2.32493
SMPD1	-1.61554	6.63849e-05	0.00188105	down	2.7256
TPP1	-1.40663	0.00249694	0.0143143	down	1.84423
GARRE1	-0.793869	1.67537e-05	0.000994305	down	3.00248
TUB	-0.826348	0.000177656	0.00306422	down	2.51368
LMO1	-2.32091	0.00138663	0.00964178	down	2.01584
DENND2B	-1.17229	0.000259011	0.00367009	down	2.43532
BLCAP	-0.652922	0.000129318	0.00255623	down	2.5924
B2M	-0.668924	0.00604836	0.0263443	down	1.57931
SLFN5	-2.22888	0.00103572	0.00799052	down	2.09743
YPEL4	-1.28241	0.0089748	0.0347796	down	1.45868
KIF7	-1.01883	8.38546e-06	0.000731633	down	3.13571
NAV2	-0.893605	0.0135271	0.047131	down	1.32669
TERF2IP	-0.670068	8.12321e-05	0.00208531	down	2.68083
LOC105371348	-0.670068	8.12321e-05	0.00208531	down	2.68083
NAB2	-0.888628	0.0038483	0.0192639	down	1.71526
VPS39	-0.607061	2.42967e-05	0.00118892	down	2.92485
NYAP1	-1.63257	0.000483093	0.00513644	down	2.28934
MAP1A	-1.53608	0.000385274	0.00457377	down	2.33973
CNPY4	-1.09513	3.69619e-05	0.00144416	down	2.84038
SGSM1	-2.23809	0.000217242	0.0033561	down	2.47416
PBX3	-0.824471	0.00052287	0.00539469	down	2.26803
ACSF2	-0.787418	0.000434943	0.00484798	down	2.31444
GOLGA2	-0.593015	9.71122e-05	0.00224571	down	2.64865
CERCAM	-0.938645	0.000679011	0.00619266	down	2.20812
PRRX2	-4.34357	6.17477e-06	0.000614933	down	3.21117
ISLR2	-4.12987	0.000126774	0.00254627	down	2.5941
ENGASE	-0.672132	0.000767282	0.00670754	down	2.17344
STIM1	-0.936422	2.83487e-06	0.000434908	down	3.3616
PRRT2	-0.979524	0.000447645	0.00492049	down	2.30799
IRGQ	-0.620144	0.00356138	0.0182801	down	1.73802
SERTAD3	-1.01623	4.02509e-05	0.00146722	down	2.83351
NCKAP5L	-0.629693	0.00305918	0.0164881	down	1.78283
RAB4B	-0.870494	0.00075124	0.00661398	down	2.17954
TMEM145	-1.07961	0.00266941	0.0149795	down	1.8245
DAPK3	-0.826439	0.000120431	0.00247326	down	2.60673
ANGPTL4	-3.51382	0.000724153	0.00647146	down	2.189
SPRYD3	-1.64123	4.48825e-05	0.0015533	down	2.80875
IGFBP6	-2.24866	8.34307e-05	0.00210628	down	2.67648
SOAT2	-1.50142	0.00344786	0.0179531	down	1.74586
ZNF597	-0.629699	0.000380244	0.00455328	down	2.34168
TRANK1	-1.0481	0.00103964	0.00799478	down	2.09719
TTC21A	-1.2434	8.01509e-05	0.00207097	down	2.68383
LTBP3	-2.48658	0.00544273	0.024509	down	1.61067
PNOC	-0.689207	0.00607008	0.026404	down	1.57833
VASN	-5.1824	3.00903e-07	0.000180706	down	3.74303
LMBRD1	-1.03512	0.000633677	0.00597441	down	2.2237
IRF2BP2	-0.687268	0.00817155	0.0325578	down	1.48735
PXK	-1.08227	0.00490679	0.0228806	down	1.64053
PCMTD1	-1.4902	5.86291e-05	0.00178742	down	2.74777
XIRP1	-2.3431	0.00974493	0.0370397	down	1.43133
BDKRB2	-1.02879	0.0023235	0.0136383	down	1.86524
KLHL30	-0.976357	0.00702282	0.0293192	down	1.53285
HR	-2.21602	1.61656e-05	0.000976738	down	3.01022
RAB31	-2.04382	0.00709541	0.0295662	down	1.5292
SERINC2	-2.23303	2.29773e-06	0.000391767	down	3.40697
SLC20A2	-1.39992	1.76175e-07	0.000120395	down	3.91939
GDNF	-2.11697	0.00199981	0.012385	down	1.9071
LDLRAD4	-3.97749	7.93055e-05	0.00205717	down	2.68673
SLC16A4	-2.06281	0.000490734	0.0051924	down	2.28463
AHCYL1	-0.635248	0.00336718	0.0176533	down	1.75317
TCTN2	-0.592721	0.00865088	0.0338821	down	1.47003
ATOH8	-2.21508	0.00306634	0.0165222	down	1.78193
VAMP5	-0.804367	0.00015024	0.00277489	down	2.55675
LRRC28	-0.621378	0.00202375	0.0124555	down	1.90464
PPIC	-1.02462	0.000247492	0.00359325	down	2.44451
ACTBL2	-1.40707	0.00437474	0.0210689	down	1.67636
ROR2	-0.792609	0.00987465	0.0373394	down	1.42783
MN1	-2.98854	0.000165462	0.00292417	down	2.534
CCDC126	-0.931511	0.00415073	0.0202909	down	1.6927
THBS3	-1.10164	0.000776948	0.00673928	down	2.17139
CA5B	-0.836531	0.0126596	0.0449138	down	1.34762
EFNA1	-0.659025	0.0111031	0.0407483	down	1.38989
KCNK9	-2.48452	0.000629449	0.00595766	down	2.22492
GPR183	-0.817118	0.000631576	0.00596836	down	2.22414
ZEB2	-0.665605	0.0055311	0.0248055	down	1.60545
CLIC3	-4.58716	4.27541e-07	0.000197047	down	3.70543
AGPAT2	-0.689937	0.00403996	0.0198858	down	1.70146
LDB2	-0.639046	0.00313526	0.0168113	down	1.7744
CSGALNACT2	-1.24425	0.000279371	0.00384613	down	2.41498
P2RY1	-1.07538	0.0027321	0.0151709	down	1.81899
WNT10B	-0.922031	0.00451316	0.0216012	down	1.66552
CALML6	-0.907963	0.00391638	0.0194377	down	1.71135
TPST1	-2.33312	1.9241e-05	0.0010599	down	2.97473
KLF13	-1.4024	1.17062e-07	0.000102724	down	3.98833
TMEM42	-0.724555	0.0097028	0.0369363	down	1.43255
MAP3K2	-1.45293	0.000188025	0.00312871	down	2.50464
IFFO2	-1.03424	0.000715792	0.00642754	down	2.19196
NSG2	-3.53845	0.000588172	0.0057308	down	2.24178
FAXDC2	-2.12013	1.93899e-05	0.0010599	down	2.97473
HSPB2	-1.12996	0.0019751	0.0122858	down	1.9106
FABP4	-0.714096	0.00531252	0.0241642	down	1.61683
SP7	-4.56286	0.00115788	0.00855967	down	2.06754
GPRC5C	-1.62183	0.000355722	0.00440331	down	2.35622
ADORA2B	-1.39727	0.00275904	0.0152691	down	1.81619
PFKFB3	-1.29789	9.24173e-06	0.000763136	down	3.1174
STAT2	-1.53285	6.06743e-05	0.0018162	down	2.74084
ATF7	-0.585654	0.00466119	0.0220572	down	1.65645
RASA4B	-2.06483	0.00730289	0.0301278	down	1.52103
SOCS6	-0.678398	0.000736694	0.00654993	down	2.18376
DCDC1	-0.611989	0.0111091	0.040759	down	1.38978
TSNARE1	-0.629137	0.00628739	0.0270577	down	1.56771
FEZ2	-0.689168	0.00110163	0.00831386	down	2.0802
ALK	-2.84355	0.000308345	0.00405813	down	2.39167
MTM1	-1.17995	4.83203e-05	0.00162307	down	2.78966
JUNB	-2.58133	4.4276e-06	0.00053832	down	3.26896
GAA	-1.01851	0.000234008	0.00348752	down	2.45748
COL24A1	-2.11751	0.00252319	0.0144123	down	1.84127
CXXC5	-1.77749	2.18084e-05	0.00112846	down	2.94751
TCEA2	-0.847712	0.00552633	0.0247897	down	1.60573
AQP4	-0.922046	0.00522702	0.0238578	down	1.62237
DRC3	-0.852556	0.0104804	0.0390635	down	1.40823
SYNPO	-0.77416	0.00744546	0.0305685	down	1.51473
LAMB2	-0.851785	0.000517252	0.00536135	down	2.27073
CFAP53	-1.15206	0.00101565	0.00790843	down	2.10191
TCEAL1	-0.780686	0.00171861	0.0111689	down	1.95199
CARNS1	-1.51715	0.000569399	0.0056442	down	2.2484
SMPDL3A	-1.00174	0.000987477	0.00777506	down	2.1093
EFEMP2	-1.14096	0.000253026	0.00363895	down	2.43902
TMEM134	-0.722071	0.00110483	0.00832097	down	2.07983
PURG	-0.683185	6.81639e-05	0.00189304	down	2.72284
RARG	-2.46819	1.61073e-05	0.000976191	down	3.01047
CES4A	-0.876737	0.00876561	0.0341919	down	1.46608
CES3	-2.1534	1.50363e-06	0.000327875	down	3.48429
NBEA	-0.829469	0.000243903	0.00355417	down	2.44926
CCDC96	-0.633475	0.00053207	0.00544808	down	2.26376
LRRN3	-2.17154	0.00988608	0.0373582	down	1.42761
ADCY5	-1.95438	2.17267e-05	0.00112717	down	2.94801
GOLGB1	-0.632009	0.00555252	0.0248622	down	1.60446
SNCG	-1.63797	0.000356212	0.00440662	down	2.35589
PPP1R3B	-1.91931	9.12431e-05	0.00217099	down	2.66334
MST1	-1.50719	3.80334e-05	0.00145333	down	2.83763
PC	-0.635279	0.0131195	0.0460345	down	1.33692
LRFN4	-0.61746	0.0094275	0.0361242	down	1.4422
HSPB7	-2.55594	0.00451696	0.0216068	down	1.66541
SUSD5	-2.57636	0.00437802	0.0210796	down	1.67614
HEG1	-1.08206	6.77819e-05	0.00189197	down	2.72308
PHOSPHO1	-2.29236	0.0133103	0.046582	down	1.33178
XXYLT1	-0.660078	0.011234	0.0410841	down	1.38633
CCS	-0.713581	1.70063e-05	0.00100009	down	2.99996
CTSF	-1.68319	0.00164302	0.0108466	down	1.96471
FAM174A	-1.35379	0.00434624	0.0209816	down	1.67816
ZDHHC24	-0.589336	0.000297746	0.00398904	down	2.39913
ZBTB4	-0.653895	0.000150803	0.00278269	down	2.55554
PHLDA3	-1.65136	0.00199342	0.0123648	down	1.90781
GLIS1	-2.14681	0.000274224	0.00379775	down	2.42047
CHRNA9	-2.40634	0.00610326	0.0264902	down	1.57691
NR1D2	-0.620239	0.000815238	0.00692812	down	2.15938
FZD4	-2.16092	0.00439798	0.0211551	down	1.67458
SEZ6L2	-2.43603	1.99222e-06	0.000388353	down	3.41077
ASPHD1	-0.97384	6.08107e-07	0.000226074	down	3.64575
KCTD13	-0.794002	1.17301e-06	0.000298034	down	3.52573
ZNF654	-2.01327	0.00216585	0.0130345	down	1.8849
YPEL2	-1.78085	9.5087e-05	0.00221959	down	2.65373
CTDSP2	-0.862962	0.000368459	0.00448533	down	2.34821
GOLGA8A	-0.821932	0.00975678	0.0370634	down	1.43105
PHYKPL	-1.04933	5.72456e-05	0.0017849	down	2.74839
GRAMD2A	-0.608736	0.00876871	0.0341919	down	1.46608
TMEM9B	-1.32452	0.000218074	0.0033561	down	2.47416
POLD4	-1.16682	0.00115404	0.00854732	down	2.06817
CABP4	-1.1617	0.0104991	0.0391113	down	1.4077
C11orf68	-0.615512	0.00113525	0.008455	down	2.07289
TMEM70	-1.04444	0.0024609	0.0141815	down	1.84828
TOM1L2	-1.44551	8.45616e-07	0.000262488	down	3.58089
HOXD8	-1.29046	0.0128002	0.0452908	down	1.34399
A2M	-3.28889	0.000158734	0.00287024	down	2.54208
ORAI3	-0.988279	0.00188348	0.0119141	down	1.92394
LYSMD3	-0.60388	0.00280073	0.0154566	down	1.81088
NUPR1	-2.49759	0.00483907	0.0226823	down	1.64431
JAKMIP2	-1.05468	0.000253399	0.00364167	down	2.4387
SPHK1	-3.21047	6.0051e-06	0.000604107	down	3.21889
TAC4	-3.07531	0.00317629	0.0169675	down	1.77038
ZNF843	-1.01179	0.00829357	0.0328485	down	1.48348
METRNL	-1.08674	0.0011221	0.00838213	down	2.07665
TCIM	-4.50963	0.00304372	0.0164451	down	1.78396
C8G	-1.28411	0.000918659	0.00747065	down	2.12664
ULK1	-0.639516	0.0010369	0.00799052	down	2.09743
MAN1B1	-0.645061	7.41006e-07	0.000247225	down	3.60691
FBXO39	-0.815305	0.0110408	0.040595	down	1.39153
PPFIA3	-1.19271	0.00642953	0.027485	down	1.5609
SAMD9L	-2.28465	0.000375418	0.00451458	down	2.34538
NAP1L5	-0.737209	0.000410512	0.00473937	down	2.32428
GPR4	-0.738253	0.00119697	0.00876954	down	2.05702
C18orf32	-0.742279	0.00150207	0.0101888	down	1.99188
NAALADL2	-0.74852	0.000111105	0.00236252	down	2.62662
NECTIN3	-1.39444	0.000470092	0.0050577	down	2.29605
MYOZ1	-3.70106	0.00599655	0.0262287	down	1.58122
PCDHB9	-1.35162	0.000129348	0.00255623	down	2.5924
TMEM187	-0.732483	0.00893655	0.0346652	down	1.46011
CCDC184	-0.879061	0.0118174	0.0425351	down	1.37125
LRRC75B	-1.91144	0.000227349	0.00343939	down	2.46352
DALRD3	-0.77929	0.00077753	0.00673928	down	2.17139
PLEC	-1.89306	0.000503892	0.00527529	down	2.27775
PLEKHM3	-1.29553	3.60142e-06	0.000482249	down	3.31673
ZNF223	-0.597217	0.00567022	0.0251871	down	1.59882
DNAJC22	-0.6969	0.0140698	0.048516	down	1.31412
DTX3	-0.685011	0.00231551	0.0136128	down	1.86605
AMBN	-1.57029	0.0111908	0.0409712	down	1.38752
MAF	-1.24025	0.000306995	0.00405109	down	2.39243
CSRNP3	-1.18705	0.000238085	0.00351855	down	2.45364
KCTD12	-2.14258	0.000102268	0.00229791	down	2.63867
RIIAD1	-1.36291	0.0013807	0.0096225	down	2.01671
TRIM73	-0.670684	0.00222443	0.0132463	down	1.8779
EFCAB13	-0.660431	0.011718	0.0422384	down	1.37429
LGALS7	-1.38299	0.00101599	0.00790843	down	2.10191
LGALS7B	-1.38299	0.00101599	0.00790843	down	2.10191
SNX18	-0.772986	0.00480719	0.0225785	down	1.64631
EXOC3L1	-2.69459	8.29375e-07	0.000262488	down	3.58089
PER1	-0.643106	0.00601528	0.0262695	down	1.58055
DAND5	-1.25541	0.000942932	0.00755336	down	2.12186
GATA2	-6.00062	7.57217e-06	0.000703078	down	3.153
EGR3	-2.30807	0.000554578	0.00556007	down	2.25492
KLHL28	-0.683077	0.00204421	0.0125231	down	1.90229
ZFPM1	-2.19029	2.87305e-05	0.00127308	down	2.89515
CDC42EP4	-0.893202	0.000322331	0.00415342	down	2.38159
LACC1	-1.13485	0.0135667	0.0472274	down	1.32581
AKAP5	-1.00425	0.000203402	0.00323838	down	2.48967
SSC5D	-2.7051	0.000207827	0.00328392	down	2.48361
TSHZ1	-1.10542	0.00353143	0.0182106	down	1.73968
C3orf80	-3.74026	0.00187309	0.0118673	down	1.92565
MTURN	-1.05232	0.000119791	0.00246833	down	2.6076
H2AC6	-1.13474	0.00284249	0.0156219	down	1.80627
SSTR2	-2.65644	1.58398e-05	0.000965884	down	3.01507
ZDHHC20	-0.630187	0.00183143	0.0116893	down	1.93221
HOXC9	-1.55078	0.000483532	0.00513731	down	2.28926
HOXC10	-1.30479	0.000223417	0.00339026	down	2.46977
GREM2	-1.80536	0.000132958	0.00260114	down	2.58484
CAPS2	-0.590286	0.00463552	0.0219726	down	1.65812
TCEAL8	-0.853259	0.00093773	0.00753014	down	2.1232
BBS12	-0.901173	0.000280241	0.00384613	down	2.41498
LSMEM1	-0.607646	0.00283287	0.0155852	down	1.80729
SLC26A11	-0.914731	0.000241293	0.00355118	down	2.44963
TMEM132E	-5.00042	1.96929e-05	0.00106341	down	2.9733
FAM89A	-0.687874	0.000281596	0.00385939	down	2.41348
UBA7	-1.27576	0.000439587	0.00487779	down	2.31178
HHIPL1	-0.753504	0.00358875	0.0183825	down	1.7356
ATP6AP2	-0.775646	0.00380358	0.0190979	down	1.71901
SYNM	-1.41611	5.2635e-06	0.0005694	down	3.24458
C1S	-1.03891	0.000319079	0.00413444	down	2.38358
TSHZ2	-1.41454	0.0113039	0.0412642	down	1.38443
BGN	-4.15769	4.47833e-05	0.0015533	down	2.80875
NXPH3	-2.76118	4.78159e-05	0.00161282	down	2.79241
TSPAN10	-0.635138	0.000613308	0.00586035	down	2.23208
IGIP	-0.8594	0.002669	0.0149795	down	1.8245
TSKU	-1.37949	8.64422e-05	0.0021463	down	2.66831
PAQR7	-0.633181	0.000519507	0.00536788	down	2.2702
CRIP2	-1.51878	3.89958e-05	0.00145571	down	2.83693
ODF3L1	-1.20256	0.000997456	0.00783184	down	2.10614
PCP4	-0.915253	0.0112411	0.0411026	down	1.38613
LYSMD4	-1.0444	0.00423044	0.0205538	down	1.68711
FAM43B	-0.76615	0.00436408	0.0210278	down	1.67721
CALHM3	-2.0796	0.00499424	0.0231739	down	1.635
TMEM119	-1.13836	9.07173e-05	0.00216346	down	2.66485
CABCOCO1	-0.896161	0.000184844	0.00310971	down	2.50728
CCDC159	-0.948045	0.00398927	0.0197057	down	1.70541
SERHL2	-1.4189	0.00135893	0.00952978	down	2.02092
TNFAIP8L3	-3.52464	0.00070332	0.00635006	down	2.19722
FBXL7	-1.32795	0.0072218	0.029873	down	1.52472
DGCR6	-1.14398	9.05611e-05	0.00216234	down	2.66508
PRR32	-0.744272	0.0139185	0.0481727	down	1.3172
NOG	-7.82581	0.00020371	0.00324007	down	2.48945
KREMEN1	-0.916014	0.00340993	0.0178071	down	1.74941
KIRREL1	-0.866247	0.00463767	0.0219774	down	1.65802
NPB	-0.847398	0.000409304	0.00473531	down	2.32465
CNTN2	-1.71081	0.000223039	0.00339026	down	2.46977
C1QTNF12	-2.95525	3.88858e-05	0.00145571	down	2.83693
GPR173	-0.8729	0.0055033	0.0247182	down	1.60698
OAF	-2.88785	0.000365779	0.00446643	down	2.35004
PRKD1	-1.3581	0.00125696	0.00908755	down	2.04155
ZDHHC23	-0.894836	0.0130629	0.0459333	down	1.33787
CSF1	-0.741423	0.00813182	0.032465	down	1.48858
PLA2G6	-0.944332	0.000243234	0.00355118	down	2.44963
PROS1	-2.64748	0.000248998	0.00360618	down	2.44295
SOCS3	-1.34874	0.0141951	0.0488375	down	1.31125
STING1	-1.83846	0.00221769	0.0132181	down	1.87883
H2BC21	-1.05126	0.000441501	0.00488581	down	2.31106
SEPTIN5	-0.879101	3.15773e-07	0.000182502	down	3.73873
RBM43	-1.05767	0.000882991	0.00727311	down	2.13828
FAM227A	-0.783908	0.00442837	0.0212858	down	1.67191
TCEAL9	-1.14172	0.00089275	0.00732913	down	2.13495
NOTUM	-4.55891	1.63225e-08	4.04348e-05	down	4.39324
GAS2L1	-0.857599	0.000531295	0.00544426	down	2.26406
PRKN	-1.05022	9.99363e-05	0.0022749	down	2.64304
SH3BGR	-0.842572	0.0020113	0.0124164	down	1.90601
TMEM179B	-0.647544	0.00238902	0.0138884	down	1.85735
MUC1	-1.18637	4.01634e-05	0.00146722	down	2.83351
LSAMP	-0.648661	0.0102799	0.0385119	down	1.41441
AHNAK2	-1.02602	0.0061667	0.0267129	down	1.57328
SYN3	-0.756204	6.68834e-05	0.00188105	down	2.7256
ADAMTSL5	-0.659374	0.000242441	0.00355118	down	2.44963
IFITM1	-2.11722	1.90174e-05	0.0010599	down	2.97473
KLHDC8B	-1.19976	8.95824e-05	0.00216139	down	2.66527
NAP1L3	-1.1841	0.000167566	0.00294922	down	2.53029
BACE1	-1.99672	0.000308384	0.00405813	down	2.39167
ZNF75D	-0.677481	1.55361e-05	0.000962173	down	3.01675
GLDN	-2.75424	0.0144309	0.0493877	down	1.30638
GNG2	-0.683849	0.000956121	0.00761898	down	2.1181
UBE2H	-1.40793	9.30831e-06	0.000765059	down	3.11631
CYP27C1	-5.00435	6.68574e-08	8.28113e-05	down	4.08191
FSCN2	-1.48167	0.000198017	0.00319568	down	2.49544
PDZD7	-1.02404	0.000139173	0.00265612	down	2.57575
POFUT2	-0.99367	1.4731e-05	0.000937995	down	3.0278
EPOR	-0.765054	0.000793915	0.0068203	down	2.1662
PCDHB13	-1.45571	0.00436289	0.0210272	down	1.67722
C11orf96	-2.5542	0.00785232	0.0317004	down	1.49894
COL4A1	-1.16993	0.00421298	0.0204941	down	1.68837
PLEKHN1	-0.59084	6.72008e-05	0.00188105	down	2.7256
ISG15	-0.618472	0.00877141	0.0341919	down	1.46608
SAMD11	-9.18763	1.6557e-09	1.09375e-05	down	4.96108
PERM1	-0.917008	0.000314031	0.00409708	down	2.38753
VMAC	-3.52224	9.53825e-07	0.000270042	down	3.56857
B3GLCT	-1.6472	4.80038e-05	0.00161518	down	2.79178
OVCH1	-1.23904	0.0102001	0.0382561	down	1.4173
S100A3	-0.925919	0.0052846	0.0240765	down	1.61841
ZFTA	-0.611425	0.00503998	0.0232772	down	1.63307
COL4A5	-1.86703	2.23535e-06	0.000391767	down	3.40697
AGRN	-0.627918	0.00345419	0.017962	down	1.74564
OTOG	-1.70222	0.000988954	0.0077776	down	2.10915
IER5L	-1.93675	0.00292964	0.0159724	down	1.79663
INSC	-2.51315	0.00776805	0.0314756	down	1.50203
FAM83G	-1.44169	0.00122825	0.00892998	down	2.04915
CCDC9B	-1.05012	3.25905e-05	0.00135404	down	2.86837
NBR1	-1.1366	2.12081e-05	0.00111182	down	2.95396
DPYD	-2.0804	0.000135399	0.00262044	down	2.58163
RHCE	-0.793651	0.0101556	0.0381037	down	1.41903
PRELP	-1.27544	0.000310323	0.0040711	down	2.39029
ZDHHC11	-1.53081	0.010211	0.0382897	down	1.41692
ENTPD8	-0.747935	0.00778507	0.0314934	down	1.50178
ASTL	-2.85238	0.00089169	0.00732912	down	2.13495
LRRC66	-0.641061	0.00472332	0.0222926	down	1.65184
SP6	-1.9109	0.00718247	0.0297788	down	1.52609
MAOA	-1.25058	0.000137413	0.00263412	down	2.57936
TSPYL1	-0.78535	0.00182639	0.0116646	down	1.93313
FHIT	-0.662542	0.00230387	0.0135726	down	1.86734
KAZN	-1.73049	0.00104782	0.0080321	down	2.09517
IL1RAP	-1.26549	0.000155968	0.00283057	down	2.54813
MATCAP1	-1.32099	0.000100526	0.00227955	down	2.64215
AKR1C3	-1.08355	0.0100765	0.037857	down	1.42185
SPATS2L	-1.26715	0.000337443	0.00427313	down	2.36925
SRGAP3	-0.791906	0.000117424	0.00244444	down	2.61182
SULT1A1	-0.604687	0.00163341	0.010815	down	1.96597
TCEAL3	-0.807137	0.00396704	0.0196204	down	1.70729
CACNA1H	-1.64767	0.0039755	0.0196524	down	1.70658
LAMA2	-1.37874	0.00358255	0.0183602	down	1.73612
ZNF846	-0.990175	0.000161349	0.00289376	down	2.53854
LOC100505555	-0.990175	0.000161349	0.00289376	down	2.53854
TCF4	-0.73782	6.68728e-06	0.000649649	down	3.18732
HRH1	-2.38145	0.000377516	0.00452882	down	2.34402
GM2A	-1.0935	3.04815e-06	0.000452697	down	3.34419
MAML3	-0.780755	0.000157269	0.00285155	down	2.54492
MVB12B	-1.33549	5.81154e-05	0.0017849	down	2.74839
ARHGEF12	-0.934075	7.21901e-05	0.00194648	down	2.71075
PDLIM7	-0.802824	0.00138305	0.00962781	down	2.01647
SRGAP1	-0.749927	0.00816885	0.0325539	down	1.4874
FUT11	-0.972161	0.00127528	0.00914384	down	2.03887
ANXA4	-0.594763	5.76045e-05	0.0017849	down	2.74839
SERTAD1	-1.44221	0.0118031	0.042493	down	1.37168
IGF2R	-0.77207	0.000208795	0.00328638	down	2.48328
SVIL	-1.8291	0.0110604	0.0406593	down	1.39084
LRP10	-0.764999	0.00132522	0.00937634	down	2.02797
UAP1L1	-1.32414	6.0026e-06	0.000604107	down	3.21889
DACT3	-1.52907	2.61856e-05	0.00123	down	2.9101
ADARB1	-0.842997	0.000295179	0.00397408	down	2.40076
MAP3K5	-2.30012	0.000139521	0.00265612	down	2.57575
MIB2	-0.697786	0.000408451	0.00473225	down	2.32493
TTC30A	-0.732862	0.00371031	0.0187867	down	1.72615
SSPOP	-1.191	0.000179093	0.00307561	down	2.51207
COL4A6	-0.909972	0.00525193	0.0239491	down	1.62071
CCDC154	-0.670831	5.47634e-05	0.00175203	down	2.75646
PARVA	-0.774375	0.0116421	0.0420645	down	1.37608
FAM114A1	-1.10262	0.000848993	0.00710229	down	2.1486
PSAP	-0.924937	0.000754175	0.00663098	down	2.17842
HOXC6	-0.979155	0.00190694	0.0120088	down	1.9205
KLHDC1	-0.725227	0.0110627	0.0406603	down	1.39083
ZNF81	-0.607707	0.000351271	0.00436587	down	2.35993
TAF13	-0.676866	0.00218135	0.0130958	down	1.88287
SGTB	-0.729606	0.00269452	0.0150677	down	1.82195
ODAD3	-0.872294	0.0049673	0.023103	down	1.63633
SULT1C4	-0.710799	0.0137828	0.0478115	down	1.32047
HMGN5	-0.768849	0.0104069	0.0388754	down	1.41033
SLC29A3	-1.68192	0.000650898	0.00605878	down	2.21761
TPM2	-0.826946	0.00164987	0.0108665	down	1.96391
ARMH1	-0.674106	0.00023485	0.00348752	down	2.45748
RD3	-2.13356	0.00355214	0.0182705	down	1.73825
MMP17	-1.33715	0.00250126	0.0143348	down	1.84361
C6orf89	-1.00354	1.63447e-05	0.000982919	down	3.00748
TOGARAM1	-0.646009	0.000174022	0.00301993	down	2.52
LDB1	-0.678337	0.000779847	0.00675481	down	2.17039
ALPK2	-4.01914	4.27748e-06	0.000533151	down	3.27315
SELENOM	-1.28749	0.000787414	0.00680252	down	2.16733
STYXL2	-0.999628	0.000825407	0.00696225	down	2.15725
RUSC2	-0.85292	0.00141247	0.0097636	down	2.01039
ATG9A	-0.849029	0.000501875	0.00526252	down	2.27881
ZFP2	-0.667816	0.00136148	0.00953757	down	2.02056
SOWAHA	-1.21833	0.00149735	0.0101736	down	1.99253
TGM2	-0.761584	0.00714729	0.0296763	down	1.52759
ARMCX6	-0.859529	4.0478e-05	0.00146922	down	2.83291
FANK1	-1.50432	0.000317743	0.00412379	down	2.3847
SOX18	-3.39252	0.00536735	0.024284	down	1.61468
EFCAB7	-0.61064	0.00859948	0.0337353	down	1.47192
MAFB	-0.729968	0.00372225	0.0188153	down	1.72549
BMPR2	-3.04477	1.27232e-05	0.000887845	down	3.05166
COL5A2	-2.02155	0.00269237	0.0150599	down	1.82218
NBDY	-0.787103	0.00562344	0.0250608	down	1.60101
PRRT1	-1.2159	5.5679e-05	0.00176269	down	2.75382
LOC100507547	-1.2159	5.5679e-05	0.00176269	down	2.75382
LAYN	-1.52523	0.000461328	0.00500329	down	2.30074
MBD5	-1.00075	9.68171e-08	0.000102724	down	3.98833
NALF1	-1.3133	0.0124891	0.044452	down	1.35211
LST1	-0.899579	0.00184961	0.0117637	down	1.92946
DDR1	-1.05672	0.00443203	0.0212879	down	1.67187
LRCOL1	-0.802305	0.0114418	0.041591	down	1.381
HLA-E	-0.830013	0.00255452	0.0145184	down	1.83808
DISP3	-1.69385	0.00169111	0.0110496	down	1.95665
PNMA8B	-0.813159	0.000902369	0.00738363	down	2.13173
ZNF783	-0.7044	5.54209e-05	0.00175733	down	2.75515
PCDHGA1	-0.772428	2.38642e-05	0.0011794	down	2.92834
PCDHA8	-0.932408	0.000383304	0.0045726	down	2.33984
C4orf47	-1.33032	0.00532881	0.0242168	down	1.61588
CFI	-3.10746	0.000750433	0.00661398	down	2.17954
SAMD9	-1.44588	0.00300614	0.0162864	down	1.78817
ETFRF1	-1.1918	0.000242231	0.00355118	down	2.44963
CYS1	-1.43919	0.000821848	0.00695731	down	2.15756
FOXL2NB	-0.750987	0.0144839	0.0494901	down	1.30548
CFAP44	-0.666746	0.00705898	0.0294453	down	1.53098
DIO2	-3.31463	0.00162921	0.0107985	down	1.96663
STK38L	-1.24881	5.05402e-05	0.00166835	down	2.77771
RTL8B	-0.62951	0.000323601	0.00416309	down	2.38058
CRIP1	-2.05281	8.21035e-06	0.000723168	down	3.14076
MLLT11	-1.61798	4.00056e-05	0.00146722	down	2.83351
ASIC3	-1.40964	4.69394e-06	0.000549096	down	3.26035
GSTM2	-1.02893	0.000695947	0.00629785	down	2.20081
HEXA	-0.753493	1.93697e-05	0.0010599	down	2.97473
GPSM3	-1.15895	0.00103758	0.00799052	down	2.09743
ATP6V1G2	-0.785417	3.50174e-05	0.00139914	down	2.85414
AP1G2	-0.734623	3.30928e-05	0.00136834	down	2.86381
TM6SF2	-1.333	0.00145683	0.00997633	down	2.00103
TTLL3	-1.21857	1.75157e-05	0.00101203	down	2.99481
SH3D21	-0.834105	0.00482234	0.0226306	down	1.6453
SMIM30	-0.786091	0.00138036	0.0096225	down	2.01671
LCNL1	-3.92256	0.00230204	0.0135698	down	1.86743
CPEB1	-1.05868	0.0113167	0.0412875	down	1.38418
ZSWIM8	-0.710352	0.00100553	0.00786406	down	2.10435
RTL10	-1.25809	0.0139646	0.04829	down	1.31614
UBE2QL1	-0.600911	0.00361867	0.0184784	down	1.73334
GOLGA8B	-0.757582	0.00236084	0.0137569	down	1.86148
MYL5	-0.898133	0.000782734	0.00676799	down	2.16954
TMEM167B	-0.644815	0.00520379	0.0238173	down	1.62311
RNASEK	-0.625687	0.000211525	0.00330907	down	2.48029
PLXNA4	-1.28064	1.03751e-05	0.000806325	down	3.09349
CCNL2	-0.76595	1.34047e-05	0.000916614	down	3.03781
BTBD19	-1.16066	0.00666116	0.0281173	down	1.55103
C1GALT1C1L	-0.851156	0.0139981	0.0483637	down	1.31548
CERS1	-1.03056	1.47671e-05	0.000937995	down	3.0278
C4B	-0.597587	0.0143257	0.0491612	down	1.30838
PLEKHM1	-0.676224	0.00663573	0.0280518	down	1.55204
NTF4	-0.704309	0.00724838	0.029958	down	1.52349
ELFN1	-2.96666	8.99987e-05	0.00216139	down	2.66527
C14orf132	-3.24501	1.47264e-05	0.000937995	down	3.0278
NKX1-2	-2.2475	0.00032954	0.00420529	down	2.3762
TAPBP	-0.705763	0.00056397	0.00561364	down	2.25076
AJM1	-1.01509	0.00345703	0.0179624	down	1.74564
LYRM9	-0.967219	1.87285e-05	0.00105456	down	2.97693
PIRT	-2.12321	0.000321902	0.00415059	down	2.38189
NFAM1	-2.87498	1.07947e-05	0.00081965	down	3.08637
KIAA0040	-2.96534	1.93461e-05	0.0010599	down	2.97473
ZBTB22	-0.753095	0.00081617	0.0069301	down	2.15926
B3GNT9	-1.92072	6.3593e-05	0.00185336	down	2.73204
CASTOR1	-0.669768	0.0105358	0.0392111	down	1.40659
RNF103	-0.864906	0.000119011	0.00246195	down	2.60872
WBP1	-0.978654	3.67391e-05	0.00143892	down	2.84196
PCDHGC3	-0.984882	0.0107817	0.0398494	down	1.39958
AQP1	-1.58575	0.00161481	0.0107354	down	1.96918
PCDHGC5	-3.04364	3.12883e-05	0.00132777	down	2.87688
PCDHGC4	-0.824988	0.00469748	0.0221865	down	1.65391
RTL5	-0.939229	0.000224606	0.00340569	down	2.46779
STON1	-1.8831	1.4578e-05	0.000937995	down	3.0278
PRAF2	-0.666143	0.00640583	0.0274192	down	1.56195
TICAM2	-0.64705	0.00556171	0.0248883	down	1.60401
SCARF2	-1.63942	0.000135868	0.0026244	down	2.58097
C4A	-0.816424	0.00282457	0.0155666	down	1.80781
LOC110384692	-0.816424	0.00282457	0.0155666	down	1.80781
USP51	-0.831185	0.00954902	0.036484	down	1.4379
PCP4L1	-0.871614	0.0118595	0.0426632	down	1.36995
PCDHA11	-1.17785	0.000364226	0.00445295	down	2.35135
PCDHA10	-0.939465	0.00219791	0.0131512	down	1.88103
TRMT9B	-1.06772	0.000412363	0.00474564	down	2.32371
TRNP1	-1.96354	0.0125558	0.0446333	down	1.35034
PCDHGB2	-1.59155	3.38026e-06	0.000464891	down	3.33265
PCDHGB1	-0.900882	0.00169003	0.0110496	down	1.95665
CHMP1B	-0.798644	3.55035e-05	0.00141287	down	2.8499
PCDHA3	-0.672555	0.00279132	0.0154216	down	1.81187
CTSO	-1.57481	2.0922e-05	0.00109982	down	2.95868
COA8	-0.611761	0.00631048	0.0271282	down	1.56658
TRAPPC2B	-0.626971	0.0116548	0.0420721	down	1.37601
ZBED6	-0.68315	0.00620726	0.0268443	down	1.57115
GALNT4	-0.594825	0.00664388	0.0280743	down	1.55169
INAFM1	-2.00994	0.0082449	0.0327306	down	1.48505
CUX1	-1.93133	5.50258e-05	0.00175203	down	2.75646
MC1R	-1.76651	3.4935e-05	0.00139867	down	2.85428
TUBB3	-1.2651	9.99664e-07	0.000275001	down	3.56067
INAFM2	-1.35138	7.01407e-05	0.00191996	down	2.71671
MIA	-0.756624	0.00452016	0.0216117	down	1.66531
PCDHGA4	-0.837666	0.00190032	0.0119855	down	1.92134
SPON1	-2.33748	0.000142841	0.00269374	down	2.56964
GJA5	-0.995626	0.00874899	0.0341919	down	1.46608
FSBP	-1.227	0.00229919	0.0135571	down	1.86783
BAHCC1	-0.641577	0.00629457	0.0270657	down	1.56758
MYO15B	-1.27986	0.000264556	0.00371315	down	2.43026
ZNF224	-0.694291	0.00178163	0.0114638	down	1.94067
TRABD2B	-3.08786	0.00391977	0.0194497	down	1.71109
SMIM32	-4.38968	1.9241e-05	0.0010599	down	2.97473
PCDHB16	-1.17732	4.83112e-06	0.000552842	down	3.2574
TMEM271	-1.20791	0.0116546	0.0420721	down	1.37601
NATD1	-0.65031	0.00613916	0.0266169	down	1.57484
ADRA2B	-2.41105	0.00147605	0.0100731	down	1.99684
H3C6	-0.978542	0.00191581	0.0120453	down	1.91918
NUDT18	-1.41548	1.06975e-05	0.000818541	down	3.08696
RAB7B	-0.91023	0.00703962	0.029377	down	1.53199
CCDC163	-0.716592	0.0112188	0.0410436	down	1.38675
TSPAN6	-0.109057	0.406417	0.579035	stable	0.237295
TNMD	-0.0783303	0.0635323	0.148058	stable	0.829569
DPM1	0.286345339620675	0.0433498	0.112095	stable	0.950413
SCYL3	-0.396072	0.00400839	0.0197706	stable	1.70398
FGR	0.0347019144920462	0.455037	0.632261	stable	0.199104
CFH	-0.00830268	0.410061	0.583052	stable	0.234293
FUCA2	0.199528601992768	0.225684	0.383686	stable	0.416024
GCLC	0.510781241833334	0.00104528	0.00802302	stable	2.09566
NFYA	-0.0185341	0.894376	1	stable	0
STPG1	-0.1624	0.293311	0.4714	stable	0.32661
NIPAL3	-0.32027	0.169264	0.307419	stable	0.512269
LAS1L	0.35877852574891	0.00729818	0.0301261	stable	1.52106
ENPP4	0.38020952165557	0.129462	0.2508	stable	0.600673
CFTR	0.0232681586548448	0.117049	0.231783	stable	0.634919
CYP51A1	0.337844937523274	0.0237279	0.0714868	stable	1.14577
KRIT1	0.0951147772862662	0.232072	0.392424	stable	0.406244
RAD52	-0.273793	0.0501385	0.125034	stable	0.902972
BAD	-0.37999	0.00429407	0.0207938	stable	1.68207
LAP3	0.631196564569322	0.0823545	0.177828	stable	0.750001
CD99	-0.319657	0.0153768	0.0516121	stable	1.28725
HS3ST1	0.150083849915926	0.50984	0.693053	stable	0.159234
AOC1	0.0135446104363458	0.728222	0.911508	stable	0.0402394
WNT16	0.119126914972821	0.0376719	0.101231	stable	0.994685
MAD1L1	0.327696770100719	0.0356567	0.0968404	stable	1.01394
LASP1	0.112757085897187	0.58324	0.769961	stable	0.113531
SNX11	0.176036448527221	0.260483	0.429508	stable	0.367029
TMEM176A	0.0233323602217649	0.703353	0.88863	stable	0.0512789
M6PR	0.18439462855986	0.00719016	0.0297919	stable	1.5259
CYP26B1	-3.37647	0.0407764	0.107233	stable	0.969674
ALS2	-0.217187	0.198036	0.346305	stable	0.460541
CASP10	-0.121048	0.0274851	0.079763	stable	1.0982
CFLAR	0.362337040656977	0.0128556	0.0454282	stable	1.34267
TFPI	-1.27846	0.0397254	0.105293	stable	0.9776
NDUFAF7	0.0673728463999188	0.353872	0.525754	stable	0.279218
RBM5	-0.218178	0.189873	0.335464	stable	0.474354
MTMR7	-0.0441443	0.274396	0.447129	stable	0.349567
SLC7A2	0.803702640688691	0.143716	0.271823	stable	0.565714
ARF5	0.0896727763909784	0.172656	0.311828	stable	0.506084
SARM1	0.0291412171781182	0.641394	0.829763	stable	0.081046
POLDIP2	0.329036778563491	0.0215916	0.0665997	stable	1.17653
AK2	0.322491500175771	0.0166909	0.0548066	stable	1.26117
CD38	-0.32307	0.0960804	0.199703	stable	0.699615
RBM6	0.173575956363361	0.317294	0.503291	stable	0.29818
CAMKK1	0.137693704073705	0.454111	0.631106	stable	0.199898
RECQL	0.255428615166196	0.0194406	0.0614962	stable	1.21115
VPS50	0.0885996156486009	0.53573	0.719949	stable	0.142698
HSPB6	-0.153427	0.666178	0.853453	stable	0.0688205
NDUFAB1	0.343199904577322	0.0242837	0.0726971	stable	1.13848
PDK4	-0.151284	0.414613	0.587418	stable	0.231052
SLC22A16	-0.080776	0.0805397	0.174842	stable	0.757353
ZMYND10	-0.54226	0.0522437	0.128913	stable	0.889702
ABCB5	-0.00030319	0.976743	1	stable	0
ARX	0.0992058942304177	0.782024	0.961483	stable	0.0170583
ST7	-0.0250535	0.849127	1	stable	0
ST7-OT3	-0.0250535	0.849127	1	stable	0
CDC27	0.460813402412883	0.0181474	0.0585362	stable	1.23258
SLC4A1	-0.000179135	0.995367	1	stable	0
CALCR	-0.319945	0.255487	0.423525	stable	0.373121
HCCS	0.413732398009683	0.0627892	0.147004	stable	0.832671
DVL2	0.163961842007336	0.195536	0.343418	stable	0.464177
PRSS22	-0.0273613	0.687618	0.873477	stable	0.0587485
UPF1	0.109038681874511	0.179295	0.321069	stable	0.493402
SKAP2	-0.286925	0.210577	0.363528	stable	0.439462
HOXA11	-0.27728	0.00420939	0.0204886	stable	1.68849
POLR2J	0.233926875204137	0.0130777	0.045966	stable	1.33756
MEOX1	-0.213556	0.0510631	0.126765	stable	0.896999
LIG3	0.532715996959046	0.00388755	0.0193625	stable	1.71304
RPAP3	0.409133794723376	0.0363803	0.0983207	stable	1.00736
ACSM3	0.0943880752151192	0.0454667	0.116176	stable	0.934884
CIAPIN1	0.52389115101704	0.0261426	0.0768571	stable	1.11432
SPPL2B	-0.0615896	0.396748	0.568092	stable	0.245581
COPZ2	-0.531389	0.0630947	0.147454	stable	0.831343
MSL3	0.415153978614886	0.000108476	0.00234307	stable	2.63022
CREBBP	0.335430940276224	0.161845	0.297206	stable	0.526943
MPO	0	1	1	stable	0
PON1	0.0224327320218901	0.349456	0.522808	stable	0.281658
GCFC2	0.705065611959503	0.0550346	0.134006	stable	0.872876
ABCB4	0.69113370603974	0.0712518	0.160135	stable	0.795515
KMT2E	-0.486553	4.31205e-05	0.00152057	stable	2.81799
SOX8	-0.395056	0.399133	0.570779	stable	0.243532
IBTK	-0.270839	0.0422149	0.109907	stable	0.958973
FBXL3	-0.419393	0.0115224	0.0417767	stable	1.37907
ITGAL	0.0212936832678641	0.549048	0.733915	stable	0.134354
PDK2	-0.557169	0.0988844	0.20405	stable	0.690264
ITGA3	-0.172742	0.538279	0.72264	stable	0.141078
ZFX	0.0659500658979555	0.656348	0.844351	stable	0.073477
ITGA2B	-0.242183	0.182765	0.32584	stable	0.486995
ASB4	-0.48115	0.00213827	0.0129332	stable	1.88829
GDE1	0.241111697028644	0.0397998	0.10542	stable	0.977077
REX1BD	0.344250150258278	0.0441984	0.113727	stable	0.944137
TMEM98	0.33811354376333	0.520226	0.703408	stable	0.152793
YBX2	0.268703565083961	0.251843	0.418711	stable	0.378086
KRT33A	0	1	1	stable	0
MAP3K14	0.322258340834846	0.276872	0.450312	stable	0.346487
ABCC8	-0.798582	0.0923014	0.194062	stable	0.712059
CACNG3	0	1	1	stable	0
TMEM132A	-0.0780403	0.813501	0.992121	stable	0.00343553
AP2B1	-0.116923	0.109898	0.220866	stable	0.655871
TAC1	0	1	1	stable	0
ZNF263	-0.137905	0.203446	0.354016	stable	0.450977
TNFRSF12A	0.159064791620226	0.432743	0.607502	stable	0.216453
DLX6	0.0159029736599567	0.707725	0.892317	stable	0.049481
MAP3K9	0.13889388780629	0.359248	0.529731	stable	0.275945
RALA	0.203590933825015	0.113499	0.226405	stable	0.645114
ETV1	-0.445444	0.00199435	0.0123667	stable	1.90775
TTC22	-0.0115897	0.378014	0.548665	stable	0.260692
CCL26	-0.635905	0.0242754	0.0726941	stable	1.1385
FARP2	0.430229078794976	0.0957991	0.199343	stable	0.700398
LGALS14	0	1	1	stable	0
COX10	0.180300585436819	0.157984	0.29171	stable	0.535048
PAF1	0.257534962767856	0.0923301	0.194081	stable	0.712016
VPS41	-0.292131	0.0129189	0.0455762	stable	1.34126
ARHGAP44	-2.73667	0.0380202	0.10196	stable	0.991571
ELAC2	0.267714672541305	0.0227873	0.0693808	stable	1.15876
SCIN	-0.335561	0.000228368	0.00344113	stable	2.4633
PNPLA4	-0.458759	0.136185	0.260816	stable	0.583666
MYH13	-0.0425028	0.161893	0.29724	stable	0.526893
ADIPOR2	-0.000964368	0.988843	1	stable	0
CDKL3	0.068312775967561	0.470474	0.650154	stable	0.186984
UPP2	-0.0621781	0.474103	0.654302	stable	0.184221
PRSS21	0	1	1	stable	0
MARK4	-0.25805	0.0554423	0.134768	stable	0.870415
CCDC124	0.482173526075889	0.00213283	0.0129142	stable	1.88893
CEACAM21	0	1	1	stable	0
PAFAH1B1	-0.0774258	0.252112	0.419087	stable	0.377696
NOS2	1.8007643251072	0.104394	0.212606	stable	0.672424
BLTP2	0.0663758449500387	0.0576083	0.138681	stable	0.857981
SLC13A2	0	1	1	stable	0
GAS7	1.10398531336824	0.0318599	0.0891303	stable	1.04997
TRAPPC6A	-0.517116	0.0590644	0.141335	stable	0.84975
MATK	0.0192822589566083	0.832126	1	stable	0
CEACAM7	0	1	1	stable	0
CD79B	0.545201828380426	0.170392	0.309064	stable	0.509951
SCN4A	0.443458328446543	0.104802	0.21324	stable	0.671131
ST7L	0.170496021445443	0.0327907	0.0909258	stable	1.04131
TKTL1	-0.168	0.0791432	0.17289	stable	0.76223
RPUSD1	0.467133429526848	0.0397524	0.105351	stable	0.977362
RHBDF1	-0.351522	0.032833	0.090992	stable	1.041
LUC7L	-0.414217	0.0159366	0.0529152	stable	1.27642
CACNA2D2	-0.0972223	0.504042	0.686772	stable	0.163187
BAIAP3	1.36309136069658	0.0291144	0.083356	stable	1.07906
TSR3	0.0558670947558815	0.680596	0.86712	stable	0.0619206
CRAMP1	-0.260881	0.0381728	0.102272	stable	0.990241
TEAD3	-0.26829	0.19761	0.345805	stable	0.461169
SELE	-0.232392	0.0662606	0.152073	stable	0.817947
DNAJC11	0.389960315580165	0.0529852	0.130284	stable	0.885108
FMO3	-0.0393596	0.341837	0.521384	stable	0.282842
NOX1	-0.0260838	0.346549	0.52141	stable	0.282821
PSMB1	0.4551568743143	0.00328249	0.0173271	stable	1.76127
SYN1	-0.459972	0.0157469	0.0524666	stable	1.28012
JARID2	0.227306922624444	0.555123	0.740338	stable	0.13057
CAMK1G	-2.01995	0.0193715	0.0613284	stable	1.21234
CDK11A	-0.280787	0.000534503	0.00544808	stable	2.26376
NADK	-0.0576985	0.475259	0.655304	stable	0.183557
TFAP2B	-0.512515	0.112769	0.225351	stable	0.64714
TFAP2D	0	1	1	stable	0
DLEC1	-0.067143	0.411612	0.58463	stable	0.233119
ADAM22	-0.282378	0.293027	0.470982	stable	0.326995
SYPL1	-0.129225	0.574725	0.7609	stable	0.118673
CELSR3	0.153597798543052	0.391013	0.561707	stable	0.25049
AASS	0.550513378964608	0.000556428	0.00556653	stable	2.25442
PLEKHG6	-0.0158718	0.555777	0.741011	stable	0.130175
SS18L2	0.134124522883487	0.488871	0.670247	stable	0.173765
MPND	0.414342984151676	0.0806875	0.175125	stable	0.756652
MGST1	0.027822003917109	0.0387901	0.10352	stable	0.984974
CRY1	0.0233190271976413	0.867501	1	stable	0
PGLYRP1	0	1	1	stable	0
NFIX	-0.4783	0.00798497	0.0320531	stable	1.49413
ST3GAL1	-1.01391	0.11507	0.2287	stable	0.640734
MMP25	0.0414658559440069	0.760958	0.940836	stable	0.0264861
IL32	0.0950017146225206	0.171467	0.310303	stable	0.508214
MAPK8IP2	0.47857217420238	0.00586307	0.0258095	stable	1.58822
MED24	0.0579620016517541	0.321366	0.508571	stable	0.293649
RHOBTB2	-0.336833	0.0471502	0.119415	stable	0.922941
HEATR5B	0.0571781443925152	0.669996	0.857474	stable	0.0667792
SEC62	-0.407718	0.014772	0.0501803	stable	1.29947
CSDE1	0.162155783308565	0.0395845	0.105021	stable	0.978723
UBE3C	-0.0292525	0.733072	0.915671	stable	0.0382608
TENM1	0.0312016061949634	0.544655	0.729196	stable	0.137156
PAX7	0.0190968283166206	0.353633	0.525537	stable	0.279396
MASP2	0.162920610067553	0.022169	0.0678841	stable	1.16823
IYD	-0.064975	0.000448401	0.00492049	stable	2.30799
FAM76A	0.079798616728199	0.508349	0.691547	stable	0.160178
TRAF3IP3	-0.00872077	0.404274	0.576811	stable	0.238966
POMT2	0.521817185196833	0.000618607	0.00588271	stable	2.23042
MLXIPL	0.489220789524035	0.0460707	0.117446	stable	0.93016
BAZ1B	0.416136143626038	0.0239386	0.0719792	stable	1.14279
RANBP9	-0.146267	0.157633	0.29124	stable	0.535749
ETV7	0.169100339862295	0.563808	0.74945	stable	0.125257
SPRTN	0.0488080901445436	0.742135	0.924195	stable	0.0342364
METTL13	0.201438916044687	0.163017	0.298749	stable	0.524694
DYRK4	-0.253063	0.0109907	0.0404592	stable	1.39298
ZNF207	0.35397755107731	0.0441902	0.11372	stable	0.944162
STARD3NL	0.00351086345925467	0.976093	1	stable	0
CD9	0.492681765764948	0.405816	0.578428	stable	0.237751
HHATL	0.552156280146045	0.0838667	0.180444	stable	0.743657
PHF7	0.477155769423078	0.000670119	0.00615124	stable	2.21104
SEMA3G	0.813453161329843	0.096023	0.199642	stable	0.699749
NISCH	-0.563695	0.000681586	0.00620187	stable	2.20748
STAB1	-0.0012122	0.951584	1	stable	0
SLC6A13	-0.103656	0.266232	0.437205	stable	0.359315
PRSS3	0.0489513172812275	0.891559	1	stable	0
ZNF200	0.558861134247063	0.0018166	0.0116171	stable	1.9349
BTK	0.0132251190819987	0.929499	1	stable	0
SCMH1	0.552332574161912	0.000402924	0.00469991	stable	2.32791
FYN	0.0147813027602659	0.82192	0.999988	stable	5.30216e-06
FMO1	0	1	1	stable	0
ELOA	0.366274206344272	0.136482	0.261308	stable	0.582847
LYPLA2	0.283696201215244	0.122931	0.240546	stable	0.618802
CLCN6	0.252936403940387	0.0128573	0.0454282	stable	1.34267
NME1-NME2	1.01181502950654	0.0259691	0.0764717	stable	1.1165
SLC6A7	0	1	1	stable	0
APBA3	-0.286272	0.00636303	0.0272926	stable	1.56396
MKS1	0.147762138513089	0.0636838	0.148271	stable	0.828943
ABHD5	-0.420232	0.0258506	0.0762361	stable	1.11784
ANOS1	0.184502924607388	0.232665	0.393191	stable	0.405397
AKAP8L	-0.285697	0.0113192	0.041289	stable	1.38417
MBTD1	0.179887466430845	0.209011	0.361605	stable	0.441766
RNF216	-0.0121131	0.9249	1	stable	0
TTC19	0.402327674420587	0.0140715	0.048516	stable	1.31412
SYT7	-0.0102926	0.918182	1	stable	0
PIK3C2A	-0.886832	0.147884	0.277982	stable	0.555983
PLAUR	0.378923752238865	0.185802	0.32986	stable	0.48167
WIZ	0.276331376502684	0.057384	0.138232	stable	0.859391
RABGAP1	-0.221113	0.0608099	0.144275	stable	0.840809
DCN	-0.105433	0.0817312	0.176829	stable	0.752448
CEP68	0.222667036932652	0.00947735	0.0362632	stable	1.44053
MAP4K3	-0.565908	0.0141783	0.048799	stable	1.31159
ZBTB32	0	1	1	stable	0
TYROBP	-0.0052599	0.960436	1	stable	0
LDAF1	0.00337623050258218	0.986611	1	stable	0
GABRA3	-0.0351058	0.606321	0.794451	stable	0.0999327
CD22	0.0203746451445684	0.64148	0.829763	stable	0.081046
SEMA3B	0.427042189861175	0.115032	0.2287	stable	0.640734
MBTPS2	-0.0831144	0.670884	0.85838	stable	0.0663202
PRICKLE3	-0.387541	0.00756828	0.0309158	stable	1.50982
LTF	0.00115414869458188	0.96428	1	stable	0
EXTL3	0.52016116376587	0.0630074	0.14732	stable	0.831739
NR1H4	0	1	1	stable	0
ELOVL5	0.215421782486286	0.0982952	0.203155	stable	0.692173
ALOX5	0	1	1	stable	0
KDM5D	-0.213261	0.0715168	0.160566	stable	0.794345
MAP4K5	-0.154944	0.228323	0.387341	stable	0.411907
EHD3	-0.599993	0.296834	0.476156	stable	0.322251
PSMC4	0.550978143490456	6.62442e-05	0.00188105	stable	2.7256
SLC7A14	-0.00648215	0.445673	0.621865	stable	0.206304
CLDN11	0.315164428549954	0.128318	0.249046	stable	0.60372
SLC25A39	0.00436474022614153	0.960068	1	stable	0
NUB1	0.101444466312908	0.046306	0.117772	stable	0.928958
PGM3	-0.332542	0.0966857	0.200683	stable	0.69749
RWDD2A	-0.692226	0.0207867	0.0646097	stable	1.1897
CLK1	0.186706141179405	0.133818	0.257451	stable	0.589306
POLR3B	0.523940336608817	0.00461897	0.0219202	stable	1.65916
ANGEL1	-0.0401758	0.758351	0.938492	stable	0.0275696
RNF14	-0.453515	0.000534691	0.00544808	stable	2.26376
HEBP1	-0.0602247	0.576413	0.762777	stable	0.117603
CD6	0.0334633528709609	0.253338	0.420701	stable	0.376026
UFL1	-0.314931	0.0303299	0.085887	stable	1.06607
ZC3H3	0.244054561087004	0.0740568	0.164536	stable	0.78374
CAPN1	-0.452102	0.00926781	0.035664	stable	1.44777
MDH1	-0.515318	0.104264	0.212409	stable	0.672827
SLC30A9	0.0817903423785156	0.523094	0.706514	stable	0.150879
COX15	0.538878227063885	0.0181285	0.0584844	stable	1.23296
YAF2	0.20159061833301	0.233081	0.39376	stable	0.404769
ZMYND11	-0.422676	0.00933898	0.0358682	stable	1.44529
WAS	-0.0678123	0.651587	0.839825	stable	0.0758112
DPEP1	0	1	1	stable	0
BID	0.427018721799829	0.00388345	0.0193614	stable	1.71306
MATR3	0.392585485613185	0.0399482	0.105756	stable	0.975693
NPC1L1	-0.767759	0.0403217	0.106489	stable	0.972695
XYLT2	-0.404589	0.00347577	0.0179992	stable	1.74475
RGPD5	-0.278815	0.00520659	0.0238176	stable	1.6231
NUDCD3	-0.23056	0.0408953	0.107446	stable	0.968811
ISL1	0	1	1	stable	0
IL20RA	0.0492449150938361	0.706337	0.89132	stable	0.0499664
CLCA1	-0.0199215	0.352411	0.524567	stable	0.280199
CLCA4	0	1	1	stable	0
GLT8D1	-0.299852	0.0123712	0.0441433	stable	1.35514
ATP2C1	-0.287711	0.0177908	0.0576203	stable	1.23942
IGF1	-0.0242864	0.0452608	0.115784	stable	0.936351
SLC38A5	-0.033998	0.520016	0.70322	stable	0.152909
RALBP1	0.0519797636027777	0.529101	0.713072	stable	0.146867
RUFY3	-0.391675	0.00501844	0.0232171	stable	1.63419
CNTN1	2.09987538837515	0.0663749	0.152265	stable	0.8174
SLC11A1	-0.124211	0.0742105	0.164765	stable	0.783136
WWTR1	-0.376676	0.0747791	0.165591	stable	0.780963
AGPS	0.171959609084261	0.107513	0.217108	stable	0.663325
STEEP1	0.118271001546901	0.250076	0.416516	stable	0.380368
ATP1A2	1.04556549937532	0.0544796	0.133063	stable	0.875941
TTC27	0.444147733493984	0.0240453	0.0722123	stable	1.14139
ZNF582	-0.0692519	0.366949	0.53717	stable	0.269888
VSIG2	-0.0734182	0.596768	0.784319	stable	0.105507
MARCO	0	1	1	stable	0
CYP24A1	-0.168226	0.171834	0.310807	stable	0.507509
SYT13	0.138400872040972	0.477978	0.658203	stable	0.18164
CD74	-0.112614	0.259186	0.427814	stable	0.368745
HGF	-0.0222711	0.132318	0.255334	stable	0.592892
ZRANB1	-0.174879	0.0498854	0.12456	stable	0.904623
NCDN	-0.424273	0.0112885	0.0412303	stable	1.38478
ZFP64	0.549511672004539	0.0299996	0.0852132	stable	1.06949
MNAT1	0.533881982150167	0.00355898	0.0182772	stable	1.73809
RUNX3	0.0985147765648018	0.445731	0.621902	stable	0.206278
PLEKHB1	0.557188283634419	0.0348031	0.0951481	stable	1.0216
SERPINB1	0.331168740561195	0.298596	0.478575	stable	0.32005
CYP3A43	0.00308598329088854	0.937756	1	stable	0
SLC7A9	0.0725051756852807	0.345503	0.521384	stable	0.282842
SPAST	0.558292306749017	0.0164475	0.0541545	stable	1.26637
NRXN3	0.737384889916299	0.0271881	0.0791327	stable	1.10164
OSBPL5	-0.72881	0.0250008	0.0743609	stable	1.12866
AQR	0.0900126719371599	0.411875	0.584877	stable	0.232935
CPS1	-1.03626	0.0945582	0.197675	stable	0.704049
C8B	0	1	1	stable	0
FHL1	-0.275474	0.00126489	0.00910558	stable	2.04069
RTF2	0.0344790387143687	0.468316	0.647985	stable	0.188435
GABRA1	-0.0101395	0.388918	0.559616	stable	0.25211
NLRP2	0	1	1	stable	0
RNF10	0.0549823805665959	0.674517	0.861368	stable	0.0648113
ZNF839	0.195653878733807	0.077491	0.170191	stable	0.769062
ZDHHC6	0.357175600689214	0.0119936	0.0430675	stable	1.36585
RNH1	-0.0804695	0.441899	0.617729	stable	0.209202
NDUFS1	0.319881594940989	0.00604609	0.0263443	stable	1.57931
RB1CC1	-0.336435	0.00191135	0.0120278	stable	1.91981
ERP44	-0.352234	0.000100531	0.00227955	stable	2.64215
ALAS1	0.375321031669272	0.0735126	0.163712	stable	0.78592
BIRC3	-0.294113	0.155525	0.288297	stable	0.54016
AKAP11	-0.362396	0.00913408	0.0352864	stable	1.45239
GLRX2	0.580105211554294	6.12365e-05	0.00182192	stable	2.73947
SNAPC1	-0.443363	0.00327211	0.0172971	stable	1.76203
DERA	0.557622687542089	0.0121858	0.043584	stable	1.36067
STRAP	0.234232700087867	0.0529597	0.130283	stable	0.885112
ABCC2	-1.3239	0.0529123	0.130231	stable	0.885287
DEF6	0.198632871093684	0.344221	0.521384	stable	0.282842
PLEKHO1	-0.0824524	0.745233	0.926829	stable	0.0330004
GCLM	0.147137040738057	0.600279	0.788254	stable	0.103334
UBR2	-0.087267	0.560832	0.746295	stable	0.127089
HSF2	0.412699825334917	0.00973299	0.0370156	stable	1.43161
PHF20	0.0474616492041564	0.485378	0.666244	stable	0.176367
HSD17B6	0.0865725368880836	0.731907	0.914388	stable	0.0388694
TYMP	0.153095454236691	0.445448	0.62171	stable	0.206412
SEC63	0.0127203344639319	0.900247	1	stable	0
KPNA6	-0.0545028	0.624792	0.812956	stable	0.0899329
RTEL1-TNFRSF6B	-0.0849545	0.619473	0.807814	stable	0.0926884
RNASET2	-0.708036	0.050328	0.12539	stable	0.901737
KCNG1	0.410266091023043	0.233701	0.394639	stable	0.4038
AGPAT4	0.279614897729648	0.373161	0.543293	stable	0.264966
SLAMF7	0.0133135616294352	0.368985	0.538836	stable	0.268544
BTN3A1	-0.0907166	0.413675	0.586466	stable	0.231757
MIPEP	0.558209534830988	0.00169458	0.0110616	stable	1.95618
PRKCH	0.314349462094727	0.396017	0.56746	stable	0.246065
INSRR	-1.3055	0.0182538	0.0588121	stable	1.23053
IFNGR1	-0.371346	0.0191245	0.0607778	stable	1.21626
B4GALT7	-0.296687	0.00355793	0.0182766	stable	1.73811
SH2D2A	-0.0511728	0.0662829	0.152089	stable	0.817901
VRK2	0.0396523994248855	0.341782	0.521384	stable	0.282842
TNFRSF1B	-0.450965	0.607342	0.795512	stable	0.0993533
VEZT	0.395301833525335	0.0114886	0.0416844	stable	1.38003
POU2F2	-0.111088	0.0444409	0.114202	stable	0.942325
[truncated: 17,462 more rows]

## Sheet: GSC_vs_NSC_LFC0.585
GSE140441
gene name	log2FoldChange	P.Value	adj.P.Val	group	log10(padj)
HUS1	0.951846	2.88e-13	4.74e-10	up	9.32385
B4GALNT1	2.85966	4.07e-13	6.27e-10	up	9.20288
NUDCD3	0.8042	1.26e-12	1.62e-09	up	8.79041
JAZF1	2.32716	1.36e-12	1.66e-09	up	8.78119
CRCP	1.03928	4.69e-12	4.71e-09	up	8.32708
CBLL1	0.814156	7.78e-12	7.48e-09	up	8.12582
TMEM140	1.0942	2.88e-11	2.55e-08	up	7.59279
PURA	1.05673	5.73e-11	4.41e-08	up	7.35513
ZFAND2A	1.42882	6.15e-11	4.48e-08	up	7.34902
PSMC2	0.892458	6.2e-11	4.48e-08	up	7.34902
HOXD9	3.1558	6.71e-11	4.7e-08	up	7.32816
PEX1	0.738754	1.18e-10	7.73e-08	up	7.11197
SNX13	0.870574	1.2e-10	7.73e-08	up	7.11197
HOTAIRM1	2.8242	1.52e-10	9.49e-08	up	7.02296
ZNF503	3.07225	1.85e-10	1.07e-07	up	6.97037
BPGM	1.19517	3.94e-10	2.17e-07	up	6.66426
TMEM255A	3.21304	8.04e-10	3.92e-07	up	6.40708
ZNF680	1.23111	1.16e-09	5.45e-07	up	6.26398
C7orf26	0.999215	1.6e-09	7.25e-07	up	6.13956
C7orf49	0.936985	1.66e-09	7.36e-07	up	6.13316
GNA12	0.730999	1.9e-09	8.28e-07	up	6.08188
CNTNAP3	2.9293	2.18e-09	9.21e-07	up	6.03553
TFAP2A	3.76546	2.19e-09	9.21e-07	up	6.03553
PPM1K	1.3168	2.26e-09	9.31e-07	up	6.03083
EBF4	2.30475	2.48e-09	1e-06	up	5.99855
SNX10	3.42345	2.6e-09	1.04e-06	up	5.98483
KCNE4	4.34382	3.24e-09	1.25e-06	up	5.90415
MKLN1	0.7533	3.53e-09	1.34e-06	up	5.87381
GCC1	0.773698	3.73e-09	1.39e-06	up	5.85746
HOXA3	3.69375	5.98e-09	2.16e-06	up	5.66614
ZNF273	0.940789	7.71e-09	2.7e-06	up	5.56878
IGIP	1.39825	9.06e-09	3.12e-06	up	5.50553
CASP2	1.0561	1.2e-08	4.08e-06	up	5.3893
KRIT1	0.844017	1.25e-08	4.16e-06	up	5.38138
HOXC4	2.83908	1.26e-08	4.16e-06	up	5.38138
ZNF468	1.16958	1.72e-08	5.37e-06	up	5.27025
NFE2L3	2.54811	1.94e-08	5.82e-06	up	5.23504
TMEM209	0.837839	2.34e-08	6.58e-06	up	5.18197
PAXIP1OS	1.59514	3.03e-08	8.24e-06	up	5.08394
LINC00888	1.14398	3.84e-08	9.82e-06	up	5.0079
WWC3	0.729731	3.87e-08	9.82e-06	up	5.0079
GK	1.4325	3.91e-08	9.82e-06	up	5.0079
CD58	1.40821	4.32e-08	1.07e-05	up	4.96947
LSM8	0.748842	5.09e-08	1.17e-05	up	4.9313
MATN2	3.54483	5.12e-08	1.17e-05	up	4.9313
SHOX2	2.7488	5.69e-08	1.28e-05	up	4.89412
SHC4	2.39955	5.86e-08	1.29e-05	up	4.89013
IKBKG	0.808123	6.33e-08	1.38e-05	up	4.8602
ULBP2	1.70324	6.41e-08	1.38e-05	up	4.85919
NDUFA4	0.801001	8.69e-08	1.78e-05	up	4.75069
KLHDC10	0.689327	9.51e-08	1.84e-05	up	4.73627
STARD3NL	0.936453	9.54e-08	1.84e-05	up	4.73627
SMURF1	1.11739	9.7e-08	1.84e-05	up	4.73627
S100A6	4.27502	9.78e-08	1.84e-05	up	4.73627
HABP4	1.16099	1.06e-07	1.98e-05	up	4.70262
ZKSCAN5	0.74869	1.09e-07	2.01e-05	up	4.69783
NDE1	1.13978	1.18e-07	2.13e-05	up	4.67244
RAC1	0.665577	1.26e-07	2.22e-05	up	4.65381
HOXD11	3.09859	1.37e-07	2.35e-05	up	4.62967
LY96	2.18619	1.48e-07	2.48e-05	up	4.60535
ZSCAN25	0.723309	1.49e-07	2.48e-05	up	4.60535
OGDH	1.11686	1.49e-07	2.48e-05	up	4.60535
FAM120C	1.21959	1.64e-07	2.71e-05	up	4.56661
SLC26A10	1.84402	1.7e-07	2.79e-05	up	4.55473
HOXD10	3.51689	1.9e-07	3.02e-05	up	4.51977
BCL7B	0.967055	1.91e-07	3.02e-05	up	4.51977
TRIM36	1.4583	1.93e-07	3.02e-05	up	4.51977
HOXC6	2.10546	1.94e-07	3.02e-05	up	4.51977
PCDHB9	2.35485	2.04e-07	3.12e-05	up	4.50596
DNM3	2.70128	2.2e-07	3.29e-05	up	4.48234
GSC	1.9569	2.26e-07	3.35e-05	up	4.47499
KBTBD2	0.871919	2.26e-07	3.35e-05	up	4.47499
HOXA5	2.38217	2.36e-07	3.48e-05	up	4.45883
THAP5	0.650385	2.38e-07	3.48e-05	up	4.4583
LINC01024	0.667036	2.4e-07	3.48e-05	up	4.4583
ST7	1.05364	2.6e-07	3.76e-05	up	4.42515
SBDSP1	0.824668	3.34e-07	4.74e-05	up	4.32464
YKT6	0.930895	3.39e-07	4.75e-05	up	4.32347
TNFAIP3	2.94306	3.68e-07	5.08e-05	up	4.29385
MED14	0.828158	4.16e-07	5.58e-05	up	4.25339
NUPL2	0.881683	5.01e-07	6.68e-05	up	4.17555
CEP85L	1.18282	5.03e-07	6.68e-05	up	4.17555
SKAP2	2.97936	5.23e-07	6.86e-05	up	4.16355
PDLIM3	2.7495	5.44e-07	6.99e-05	up	4.15572
LZTS3	1.34155	5.45e-07	6.99e-05	up	4.15572
USP42	0.635786	6.49e-07	8.1e-05	up	4.09166
METTL2B	0.630296	6.52e-07	8.1e-05	up	4.09166
KLHL13	2.35612	6.56e-07	8.1e-05	up	4.09166
TMEM248	0.680918	6.62e-07	8.11e-05	up	4.09105
ZNF12	0.720758	6.64e-07	8.11e-05	up	4.09105
DGKG	2.19891	6.94e-07	8.4e-05	up	4.07594
XIAP	0.694727	8.24e-07	9.68e-05	up	4.01415
ARL4A	1.47106	8.24e-07	9.68e-05	up	4.01415
ITGB3	3.45306	8.3e-07	9.68e-05	up	4.01415
HLA-A	1.90507	8.84e-07	0.000102082	up	3.99105
WASL	0.703578	9.16e-07	0.000104706	up	3.98003
PPM1B	0.60138	9.57e-07	0.000108884	up	3.96304
TMEM60	0.707164	1.04e-06	0.000116188	up	3.93484
HSF4	1.65281	1.06e-06	0.000116716	up	3.93287
RSRC1	0.835254	1.16e-06	0.00012685	up	3.89671
HOXB3	4.31503	1.22e-06	0.000132556	up	3.8776
IFRD1	1.01785	1.26e-06	0.00013541	up	3.86835
LOC493754	0.714089	1.29e-06	0.00013827	up	3.85927
STRIP2	1.49618	1.33e-06	0.00014058	up	3.85208
NSD1	1.72968	1.34e-06	0.000140958	up	3.85091
DSCAM	3.60189	1.37e-06	0.000143355	up	3.84359
SPATA2	0.61312	1.39e-06	0.000144098	up	3.84134
LTB4R	1.38612	1.41e-06	0.000145668	up	3.83664
KIFC3	1.24388	1.42e-06	0.000145933	up	3.83585
ZDHHC4	0.919085	1.47e-06	0.000151242	up	3.82033
TANGO2	0.732902	1.5e-06	0.000153059	up	3.81514
MFSD6	2.66412	1.57e-06	0.000158509	up	3.79995
HOXA1	1.48237	1.63e-06	0.000163238	up	3.78718
TRANK1	2.84058	1.63e-06	0.000163238	up	3.78718
KIAA0040	3.48748	1.66e-06	0.000165349	up	3.7816
RHEB	0.926277	1.68e-06	0.000166483	up	3.77863
ZNF136	0.765619	1.71e-06	0.000168859	up	3.77248
KLHL4	2.93857	1.75e-06	0.0001721	up	3.76422
LINC00630	0.692034	1.78e-06	0.000173705	up	3.76019
ZNF138	0.909399	1.82e-06	0.000176719	up	3.75272
SEPT7P2	0.769311	1.83e-06	0.000176719	up	3.75272
GTPBP10	0.624569	1.84e-06	0.000176719	up	3.75272
VOPP1	1.25537	2.04e-06	0.000193457	up	3.71342
CCT6P3	0.755211	2.26e-06	0.000211151	up	3.67541
SNAP25	2.72088	2.31e-06	0.000214632	up	3.6683
TFCP2	2.18082	2.44e-06	0.000223962	up	3.64983
ZNF503-AS2	1.79603	2.68e-06	0.000243695	up	3.61315
TRRAP	0.736706	2.74e-06	0.000248542	up	3.6046
CNTNAP3B	1.9603	2.77e-06	0.000248967	up	3.60386
MOCS2	0.698658	2.93e-06	0.00026122	up	3.58299
IL16	1.06866	3.03e-06	0.00026805	up	3.57178
ANKIB1	0.809252	3.08e-06	0.000270271	up	3.5682
CEMIP	3.0469	3.17e-06	0.000277544	up	3.55667
PLEKHF2	0.900353	3.34e-06	0.000289883	up	3.53778
NRG2	1.95102	3.38e-06	0.000292143	up	3.53441
AAED1	0.978809	3.46e-06	0.000297104	up	3.52709
NUDT19	1.0088	3.56e-06	0.000304771	up	3.51603
C1orf94	2.68924	3.63e-06	0.000309756	up	3.50898
ZNF107	1.04665	3.71e-06	0.000313982	up	3.5031
TESK1	0.908833	3.71e-06	0.000313982	up	3.5031
TFAP2A-AS1	1.29926	3.73e-06	0.000314705	up	3.5021
RPA3OS	0.725557	3.81e-06	0.000319718	up	3.49523
HOXC10	2.60443	3.86e-06	0.000322395	up	3.49161
CSMD2	4.36018	3.87e-06	0.000322395	up	3.49161
HOXC9	1.79861	4.2e-06	0.000347785	up	3.45869
CMTM1	1.02441	4.31e-06	0.000355139	up	3.4496
LSM5	0.722379	4.37e-06	0.000357519	up	3.4467
KRBA1	0.730413	4.69e-06	0.000381537	up	3.41846
URGCP	0.776581	4.72e-06	0.000381621	up	3.41837
PNPLA8	0.85677	4.73e-06	0.000381621	up	3.41837
ZNF230	0.71203	4.82e-06	0.000385359	up	3.41413
THY1	3.31359	4.91e-06	0.000391154	up	3.40765
UCK1	0.807286	5.02e-06	0.000397217	up	3.40097
DUSP15	1.69261	5.07e-06	0.000398353	up	3.39973
TAF6	0.777225	5.31e-06	0.000412673	up	3.38439
BUD31	0.641188	5.4e-06	0.000415364	up	3.38157
ARHGAP25	2.55205	5.47e-06	0.000419129	up	3.37765
DRD2	3.22423	5.89e-06	0.000444303	up	3.35232
CSF1	2.42024	5.91e-06	0.000444303	up	3.35232
HERC5	2.35529	6e-06	0.000447018	up	3.34968
KCNIP3	1.87307	6.04e-06	0.000447018	up	3.34968
TAX1BP1	0.909342	6.05e-06	0.000447018	up	3.34968
FAM84B	2.71498	6.27e-06	0.000458407	up	3.33875
LRRK2	2.8365	6.53e-06	0.000474415	up	3.32384
ZNF747	1.20687	6.75e-06	0.000485721	up	3.31361
WBSCR27	1.42777	6.9e-06	0.000491572	up	3.30841
ATP6V0E2-AS1	1.17488	7.31e-06	0.000516029	up	3.28733
CKLF	0.916606	7.38e-06	0.000518203	up	3.2855
BAZ1B	0.770032	7.69e-06	0.000535485	up	3.27125
KLHL5	1.25692	7.7e-06	0.000535485	up	3.27125
ALAS1	0.772706	7.8e-06	0.000538804	up	3.26857
STAG3L4	0.952984	7.82e-06	0.000538804	up	3.26857
POLR2J	0.699453	7.82e-06	0.000538804	up	3.26857
FAM219A	0.902504	8.11e-06	0.000553041	up	3.25724
FOXD2-AS1	1.39192	8.4e-06	0.000564495	up	3.24834
ZFP37	0.805611	8.6e-06	0.000575851	up	3.23969
ZNF26	0.667433	8.94e-06	0.000594963	up	3.22551
IGSF3	2.95947	9.03e-06	0.000597637	up	3.22356
PROX1	2.70264	9.03e-06	0.000597637	up	3.22356
COPS6	0.778211	9.59e-06	0.000631242	up	3.1998
RNF144A	1.76592	9.78e-06	0.000638101	up	3.19511
H2AFV	0.872344	1.02e-05	0.000660641	up	3.18003
CCDC126	1.02459	1.05e-05	0.000678342	up	3.16855
ATP6V1B1	1.4634	1.13e-05	0.000718243	up	3.14373
HOXA6	0.995489	1.15e-05	0.000724939	up	3.1397
SPR	1.07872	1.16e-05	0.000730235	up	3.13654
SPECC1	1.52498	1.18e-05	0.000731274	up	3.13592
NUP205	0.932805	1.27e-05	0.000785003	up	3.10513
SIPA1L2	1.68369	1.32e-05	0.000810771	up	3.0911
KMT2C	0.669247	1.36e-05	0.00083048	up	3.08067
FAM3C	1.10746	1.42e-05	0.000859116	up	3.06595
AKR1B1	1.45425	1.46e-05	0.00087442	up	3.05828
HLA-L	1.38506	1.53e-05	0.000907915	up	3.04195
PTGFRN	2.37084	1.84e-05	0.00104689	up	2.9801
HLA-H	1.71901	1.86e-05	0.00105691	up	2.97596
FGF12	3.12973	1.89e-05	0.0010688	up	2.9711
DUS4L	0.706383	1.97e-05	0.00111155	up	2.95407
LINC01138	1.2846	2.01e-05	0.00111852	up	2.95136
RINT1	0.702383	2.05e-05	0.0011385	up	2.94367
LOC400043	2.22399	2.08e-05	0.00115236	up	2.93841
GATAD1	0.593529	2.1e-05	0.00116487	up	2.93372
LINC00674	0.836981	2.13e-05	0.00117516	up	2.9299
PLEKHA8	0.613575	2.19e-05	0.00120198	up	2.9201
MCF2L2	1.00522	2.21e-05	0.0012105	up	2.91704
DDO	1.74207	2.22e-05	0.00121353	up	2.91595
HOXC8	1.45891	2.4e-05	0.00130016	up	2.886
ISL2	1.29747	2.44e-05	0.00130861	up	2.88319
SLC35B4	0.688015	2.47e-05	0.00132265	up	2.87856
RELL2	1.04269	2.86e-05	0.00149343	up	2.82582
DPY19L1P1	0.66672	2.88e-05	0.0014947	up	2.82545
NKX2-2	3.02156	2.88e-05	0.0014947	up	2.82545
MAPRE3	1.06181	2.99e-05	0.00154439	up	2.81124
PHTF2	0.841224	3e-05	0.00154439	up	2.81124
ATP6AP2	0.642263	3.3e-05	0.0016786	up	2.77505
CXorf57	2.22202	3.35e-05	0.00169861	up	2.76991
STAG3L2	1.05911	3.4e-05	0.00171496	up	2.76575
LRWD1	0.875667	3.4e-05	0.00171496	up	2.76575
EIF2AK1	0.633876	3.53e-05	0.00176683	up	2.75281
ZNF785	1.58421	3.61e-05	0.00179806	up	2.74519
PDE8A	0.674949	3.65e-05	0.00180931	up	2.74249
FIGNL1	1.30949	3.66e-05	0.001811	up	2.74208
FAM122B	1.01877	3.7e-05	0.00182538	up	2.73865
SLC25A40	0.803167	3.73e-05	0.00183619	up	2.73608
PPP1R3F	1.19675	3.83e-05	0.00186924	up	2.72833
DPY19L2P2	1.07582	3.86e-05	0.00188047	up	2.72573
HOXA10	2.26057	3.92e-05	0.00190725	up	2.71959
RAB29	1.21756	4.07e-05	0.00196845	up	2.70588
GSTK1	0.862269	4.12e-05	0.00197644	up	2.70412
GATSL2	1.0909	4.13e-05	0.00197644	up	2.70412
NOM1	0.721037	4.16e-05	0.00198796	up	2.70159
ASB6	0.685847	4.43e-05	0.00210285	up	2.67719
GET4	0.648862	4.48e-05	0.00211509	up	2.67467
RBM28	0.724126	4.49e-05	0.00211509	up	2.67467
CYCS	0.946684	4.54e-05	0.00212791	up	2.67205
ASIC3	1.24451	4.55e-05	0.00212791	up	2.67205
ZNF3	0.674829	4.59e-05	0.00214321	up	2.66893
PCDHB10	1.88752	4.62e-05	0.00214985	up	2.66759
POM121C	0.73647	4.66e-05	0.0021675	up	2.66404
MICALL2	1.39481	4.79e-05	0.00221258	up	2.6551
MID1	1.54042	4.8e-05	0.00221258	up	2.6551
GRID1	3.13882	4.89e-05	0.00224744	up	2.64831
GIMAP2	1.39742	4.96e-05	0.00227052	up	2.64387
POU6F1	1.23349	5.08e-05	0.00231198	up	2.63602
KLF4	1.64671	5.09e-05	0.00231216	up	2.63598
LINC00869	0.845725	5.43e-05	0.00245289	up	2.61032
ITGA2	2.98715	5.45e-05	0.00245921	up	2.6092
HOXB7	2.96932	5.49e-05	0.0024657	up	2.60806
ZNF816	0.822995	5.53e-05	0.00247426	up	2.60656
MOSPD2	0.83055	5.6e-05	0.00249777	up	2.60245
ZDHHC23	2.06946	5.74e-05	0.00254373	up	2.59453
PPFIBP1	1.18918	5.74e-05	0.00254373	up	2.59453
GUSB	1.01468	5.91e-05	0.0026025	up	2.58461
ZNF316	0.693763	6.13e-05	0.00267915	up	2.572
TRAF1	2.30777	6.42e-05	0.00279358	up	2.55384
PPAPDC3	2.14965	6.75e-05	0.00291317	up	2.53563
ZNF697	1.00848	6.88e-05	0.00296511	up	2.52796
ZIK1	0.932552	7.06e-05	0.00303655	up	2.51762
P2RX7	2.14409	7.13e-05	0.00304415	up	2.51653
LRP11	0.90076	7.25e-05	0.00308182	up	2.51119
NT5C3A	0.703708	7.33e-05	0.00310057	up	2.50856
ZNF611	1.03552	7.69e-05	0.00320394	up	2.49432
PMS2P5	0.632375	7.8e-05	0.00322988	up	2.49081
RUNX1	1.18715	7.81e-05	0.00322988	up	2.49081
FHL1	0.978896	7.82e-05	0.00322988	up	2.49081
TMEM161B	0.684943	7.9e-05	0.00325705	up	2.48718
HOXA4	2.26202	8.1e-05	0.00332002	up	2.47886
LEF1	3.10001	8.59e-05	0.0034785	up	2.45861
HP08942	1.17079	8.68e-05	0.00350164	up	2.45573
AHCYL2	0.962366	8.73e-05	0.003508	up	2.45494
CD82	2.35466	8.87e-05	0.00354891	up	2.4499
BATF3	1.18517	9e-05	0.00359639	up	2.44413
POU3F2	1.9514	9.22e-05	0.00367814	up	2.43437
HLA-F-AS1	1.40182	9.41e-05	0.00373206	up	2.42805
PLA2G4A	2.05797	9.6e-05	0.00380396	up	2.41976
AVL9	0.883902	9.75e-05	0.0038568	up	2.41377
GSAP	2.26643	9.78e-05	0.00385887	up	2.41354
WHAMMP2	1.04932	9.91e-05	0.00390014	up	2.40892
GLUL	1.3475	0.000102462	0.00400382	up	2.39753
CBR3-AS1	0.775902	0.000104239	0.00402556	up	2.39517
CLDN12	0.788943	0.000104865	0.00404292	up	2.39331
NFKBIE	0.824315	0.000105038	0.00404292	up	2.39331
C7orf43	0.798309	0.000111658	0.00426218	up	2.37037
NDUFB2	0.71876	0.00011205	0.0042701	up	2.36956
DFNA5	1.15872	0.000113103	0.00430312	up	2.36622
ICOSLG	2.71864	0.000118316	0.00447931	up	2.34879
HOXA2	2.24378	0.000118735	0.00448783	up	2.34796
DDX23	0.608943	0.000119859	0.0045229	up	2.34458
CABP4	0.953758	0.000125853	0.00470802	up	2.32716
SLC30A4	1.06142	0.000126111	0.00470802	up	2.32716
PDIA3P1	1.00022	0.000126267	0.00470802	up	2.32716
AAK1	0.679035	0.000128246	0.0047616	up	2.32225
TMEM106B	0.949142	0.00012886	0.0047767	up	2.32087
CD27-AS1	1.54471	0.000130949	0.00483862	up	2.31528
TAOK3	1.26832	0.000132579	0.00489103	up	2.3106
AKIRIN2	0.661536	0.00013312	0.00490177	up	2.30965
TRMT2B	0.736389	0.000133295	0.00490177	up	2.30965
MARK1	1.43114	0.000134802	0.00494144	up	2.30615
CCDC14	0.714465	0.000136605	0.0049996	up	2.30106
HOXD4	1.83387	0.000138417	0.00504898	up	2.2968
PMS2P9	0.935169	0.00014048	0.00509815	up	2.29259
FIBIN	2.89364	0.000140689	0.00509815	up	2.29259
CD9	1.89629	0.000140843	0.00509815	up	2.29259
NR1D2	0.732044	0.000143098	0.00516361	up	2.28705
STBD1	0.673178	0.000149712	0.00535209	up	2.27148
OAS3	2.31051	0.000151045	0.00539139	up	2.2683
ENDOD1	1.73818	0.000155897	0.00554743	up	2.25591
DUSP10	1.30404	0.000157548	0.00558038	up	2.25334
TNPO3	0.600337	0.00015807	0.0055903	up	2.25257
NDP	1.88418	0.000159315	0.00561714	up	2.25048
CDK5	0.713679	0.000164787	0.0058012	up	2.23648
NKX3-1	1.73105	0.000165829	0.005829	up	2.23441
2025-03-02	1.41203	0.000168144	0.0058746	up	2.23102
FASTK	0.650833	0.000169691	0.0059197	up	2.2277
AGK	0.778329	0.000172353	0.00598951	up	2.22261
SEL1L3	2.64421	0.0001733	0.0060093	up	2.22118
ABHD5	0.731331	0.000174497	0.00603267	up	2.21949
ADCK2	0.869124	0.000174879	0.00603686	up	2.21919
NNT-AS1	0.913796	0.000177596	0.00611586	up	2.21354
MSX1	1.29307	0.00017777	0.00611586	up	2.21354
LYST	1.1279	0.000183184	0.00625807	up	2.20356
FBXL18	0.767556	0.000183883	0.00627268	up	2.20255
C9orf64	2.52115	0.000184424	0.00628184	up	2.20191
LONRF3	1.91742	0.00018618	0.00630506	up	2.20031
KIAA1147	0.679356	0.000186307	0.00630506	up	2.20031
NEK10	0.718904	0.00018987	0.00638917	up	2.19456
FAM126A	1.03017	0.000191005	0.00640214	up	2.19367
DHX58	1.9974	0.00019332	0.00646096	up	2.1897
ITPKA	1.40822	0.00019494	0.00650569	up	2.18671
GTF2IRD1	0.728745	0.000196313	0.00653264	up	2.18491
DPY19L1	1.02897	0.000199819	0.00661791	up	2.17928
HS6ST1	1.73902	0.000201826	0.00666807	up	2.176
KIZ	0.966594	0.000202757	0.00668923	up	2.17462
CD101	1.73084	0.000204179	0.00672039	up	2.17261
OSTM1	0.929465	0.000204283	0.00672039	up	2.17261
CDKN2C	1.98474	0.000204946	0.0067326	up	2.17182
KHDC1	1.22008	0.000206928	0.00676884	up	2.16949
TPM3P9	0.652273	0.000208308	0.00680433	up	2.16721
ZNF28	0.789057	0.000209002	0.00681736	up	2.16638
WBSCR22	0.699833	0.000210725	0.00685422	up	2.16404
CDC42EP3	2.32843	0.000211631	0.00686921	up	2.16309
GPR137C	0.972213	0.000211917	0.00686921	up	2.16309
CDC14B	1.00169	0.000213504	0.00688641	up	2.16201
CEP19	0.88235	0.00021505	0.00692152	up	2.1598
FOXD1	2.39474	0.000217319	0.00698022	up	2.15613
TPK1	0.779874	0.000217801	0.00698098	up	2.15608
MGC27345	0.692396	0.000217948	0.00698098	up	2.15608
POLD2	0.696586	0.000219637	0.00698975	up	2.15554
SLC39A3	0.756887	0.000219992	0.00698975	up	2.15554
CLCN4	1.21636	0.000220038	0.00698975	up	2.15554
RBM48	0.599128	0.000222598	0.00705167	up	2.15171
C5	1.45202	0.000223837	0.00707153	up	2.15049
COX10-AS1	0.687237	0.000227435	0.00715583	up	2.14534
IRAK1	1.20021	0.000229691	0.00720719	up	2.14223
TM4SF1	2.70695	0.000234582	0.00734069	up	2.13426
ZNF845	0.642966	0.000236566	0.00738244	up	2.1318
2025-09-04	1.75999	0.000238159	0.00740651	up	2.13039
OXR1	0.800454	0.000238609	0.00740651	up	2.13039
FICD	0.664504	0.000238994	0.0074085	up	2.13027
EEA1	0.612303	0.000243079	0.00751494	up	2.12407
ELFN2	2.30597	0.000244656	0.00754349	up	2.12243
ARHGAP20	2.77695	0.000245045	0.00754542	up	2.12232
ZNF530	0.792595	0.000246408	0.0075773	up	2.12049
CCT6P1	0.595622	0.000249705	0.00764934	up	2.11638
GSTM4	1.39814	0.000252973	0.00772771	up	2.11195
FOXD2	1.19639	0.000255888	0.00780646	up	2.10755
HAGLR	2.63938	0.000260375	0.0079224	up	2.10114
UBE2A	0.699589	0.000262724	0.00797286	up	2.09839
AGBL3	0.64626	0.000263359	0.00798164	up	2.09791
LOC100130705	1.18404	0.000265268	0.00801847	up	2.09591
DHPS	0.643235	0.000271074	0.00817255	up	2.08764
CA5B	0.727636	0.000272199	0.00818511	up	2.08698
CSGALNACT1	2.61586	0.000272974	0.00818952	up	2.08674
MALSU1	0.586515	0.000273055	0.00818952	up	2.08674
SP4	0.73285	0.000279386	0.00832533	up	2.0796
IQCH	0.749078	0.000279755	0.0083256	up	2.07958
SLC7A8	2.32675	0.000282366	0.00838169	up	2.07667
MLLT11	0.889685	0.000300722	0.00880245	up	2.0554
SYTL4	1.22207	0.000301095	0.00880245	up	2.0554
ST3GAL1	1.28591	0.000301495	0.00880245	up	2.0554
ABCG2	1.2425	0.000305063	0.00888413	up	2.05138
PRKD3	0.729526	0.000307902	0.00895552	up	2.04791
CCM2	0.744433	0.000313051	0.00909385	up	2.04125
NUB1	0.729155	0.000314545	0.00912575	up	2.03973
C16orf52	0.641213	0.000319719	0.00924104	up	2.03428
CIDECP	0.605926	0.000320631	0.00925582	up	2.03358
HOXD-AS2	1.18075	0.000322663	0.00929666	up	2.03167
ZNF92	0.961345	0.000323254	0.00929666	up	2.03167
NKX3-2	1.22391	0.000325008	0.00933538	up	2.02987
PARD6B	1.08782	0.000325408	0.00933538	up	2.02987
PLEKHH2	1.79925	0.000334832	0.00952291	up	2.02123
ZIC1	2.00442	0.000336638	0.00955359	up	2.01983
PRPF3	0.607961	0.000336738	0.00955359	up	2.01983
PTGER4P2-CDK2AP2P2	1.05224	0.000337314	0.00955819	up	2.01962
GPR156	1.13802	0.00033822	0.00957212	up	2.01899
MED12L	1.34805	0.000339755	0.00959286	up	2.01805
ARMCX4	0.961595	0.00034201	0.00964393	up	2.01575
MLF1	0.985103	0.000352519	0.00990397	up	2.00419
C10orf90	1.9216	0.000353366	0.00991572	up	2.00368
RP9P	0.78356	0.000359656	0.0100313	up	1.99864
BIRC3	2.45473	0.000360607	0.0100457	up	1.99802
TMEM229B	1.18976	0.000364263	0.0101353	up	1.99416
BAMBI	2.07475	0.000367241	0.0102058	up	1.99115
HOXC5	1.08993	0.000369298	0.0102084	up	1.99104
BTBD3	0.852085	0.000369535	0.0102084	up	1.99104
LAMP2	1.19659	0.000371073	0.0102384	up	1.98977
TMEM116	0.764964	0.000373718	0.0102868	up	1.98772
LOC648987	0.609245	0.000377751	0.0103804	up	1.98379
PCED1A	0.634269	0.000381768	0.0104585	up	1.98053
KIAA1715	0.606376	0.000387427	0.0105885	up	1.97517
POT1	0.844278	0.00038848	0.0106047	up	1.9745
AP5Z1	0.76316	0.000391001	0.0106609	up	1.97221
GPR116	0.687204	0.000397837	0.0108114	up	1.96612
LINC-PINT	0.824016	0.000397927	0.0108114	up	1.96612
LINC00997	1.04047	0.000404816	0.0109599	up	1.96019
SCG5	2.0269	0.000410364	0.0110878	up	1.95516
MYRF	2.43026	0.000411856	0.0111115	up	1.95423
CABLES2	0.811877	0.000414294	0.0111564	up	1.95248
RHOBTB2	0.86305	0.000417108	0.0111878	up	1.95126
GAB3	1.65098	0.000428221	0.0114259	up	1.94211
LINC00654	1.59712	0.000429976	0.0114399	up	1.94158
NCAPG2	1.10383	0.000431497	0.011454	up	1.94104
CYP27A1	2.11068	0.000437996	0.0115733	up	1.93654
HIST2H2BF	0.702369	0.000445338	0.0117271	up	1.93081
TOR1B	0.68046	0.000447506	0.0117628	up	1.92949
ABHD3	0.767293	0.000447715	0.0117628	up	1.92949
SAP30L	0.768456	0.000452281	0.0118421	up	1.92657
HPS3	0.650043	0.000458818	0.0119864	up	1.92131
HPSE	1.42356	0.000459891	0.0120008	up	1.92079
COX17	0.730514	0.000468417	0.0121958	up	1.91379
HOXD8	1.93458	0.000476895	0.0123607	up	1.90796
TP73	2.71525	0.000480932	0.0124374	up	1.90527
EPAS1	2.78647	0.000489072	0.0126056	up	1.89944
IL32	1.88729	0.000492048	0.0126367	up	1.89837
MR1	1.62046	0.000492404	0.0126367	up	1.89837
ZNF93	0.882838	0.000492468	0.0126367	up	1.89837
SLC22A4	1.31677	0.000496437	0.0127244	up	1.89536
CCSAP	0.859544	0.000498135	0.0127538	up	1.89436
FAM124A	0.789816	0.000507559	0.0129377	up	1.88814
RTTN	0.712797	0.000509927	0.0129837	up	1.8866
ZNF736	0.882981	0.000512447	0.0130335	up	1.88494
NOTCH4	1.22453	0.0005145	0.0130465	up	1.88451
SULF2	1.68876	0.000514652	0.0130465	up	1.88451
CLMN	1.62585	0.000516744	0.0130852	up	1.88322
VAX2	1.11048	0.000527902	0.0132953	up	1.8763
BBS9	0.717626	0.000534373	0.0133781	up	1.87361
CENPL	0.723589	0.000539434	0.0134749	up	1.87048
GCNT2	1.86513	0.00055685	0.013813	up	1.85971
PCDHB8	1.48745	0.000565418	0.0139955	up	1.85401
L3MBTL4	1.89144	0.000566751	0.0140134	up	1.85346
LOC101927468	0.611958	0.000577172	0.0141951	up	1.84786
SLC4A7	1.11437	0.000587144	0.0143944	up	1.84181
CORO2A	1.46649	0.000588848	0.0143995	up	1.84165
KATNAL2	0.989204	0.000589225	0.0143995	up	1.84165
CMPK2	1.05867	0.000592159	0.0144559	up	1.83995
OPCML	2.87392	0.000597893	0.0145651	up	1.83669
SLC46A1	0.720702	0.000600172	0.0145899	up	1.83595
SPDYE5	0.898359	0.000602152	0.0146226	up	1.83498
SH3BGR	1.36092	0.000603516	0.0146403	up	1.83445
TIGD7	0.662188	0.000614591	0.0148311	up	1.82883
NMNAT2	1.7769	0.000617513	0.0148572	up	1.82806
CCDC132	0.611565	0.000617602	0.0148572	up	1.82806
PMS2P3	0.620494	0.000623816	0.0149541	up	1.82524
GOLGA3	0.644468	0.000624219	0.0149541	up	1.82524
ABHD12	0.746985	0.000630219	0.0150727	up	1.82181
CDHR2	0.830623	0.000630525	0.0150727	up	1.82181
PLOD3	0.943719	0.000631127	0.0150727	up	1.82181
SNX21	0.615444	0.000646102	0.0153984	up	1.81252
KIAA1244	2.59822	0.000653314	0.0155543	up	1.80815
C7orf57	2.07406	0.000656804	0.0156212	up	1.80628
KANK1	1.43994	0.00066121	0.0156874	up	1.80445
OPRL1	1.18873	0.000661624	0.0156874	up	1.80445
CBWD5	0.670241	0.000671672	0.015893	up	1.79879
B3GALNT1	1.95952	0.000673367	0.0159168	up	1.79814
UPK3BL	0.91693	0.000676266	0.015969	up	1.79672
SIX1	1.6818	0.000678727	0.0160108	up	1.79559
ZNF555	0.674028	0.000683913	0.0161002	up	1.79317
BARD1	0.703953	0.000687318	0.0161474	up	1.7919
PSMG3	0.787133	0.000702942	0.0163977	up	1.78522
RELT	0.94885	0.000705155	0.0164327	up	1.78429
CPEB1	1.64297	0.000707629	0.0164735	up	1.78321
ANKEF1	1.19005	0.000718969	0.0167041	up	1.77718
VAV3	2.21794	0.000730065	0.016877	up	1.7727
ESRRG	1.64343	0.000733451	0.0169383	up	1.77113
FUT4	1.14186	0.000735093	0.0169423	up	1.77103
GDAP2	0.598965	0.000735954	0.0169453	up	1.77095
TDRD7	1.28567	0.000752547	0.0172929	up	1.76213
C5orf34	0.87503	0.000765897	0.0175298	up	1.75622
ADCY1	2.21735	0.000767152	0.0175412	up	1.75594
BHLHE41	2.26843	0.000783139	0.0178714	up	1.74784
DPY19L2P1	0.944419	0.000793475	0.0180257	up	1.74411
GNB2	0.593232	0.000808568	0.0182744	up	1.73816
CHST1	2.16546	0.000809507	0.0182744	up	1.73816
SEPT5-GP1BB	1.49296	0.000825891	0.0185356	up	1.73199
EFEMP1	4.18536	0.000828117	0.0185675	up	1.73125
COX19	0.646691	0.000851109	0.0189542	up	1.72229
WDR91	0.644836	0.000856038	0.0190073	up	1.72108
HEIH	0.723602	0.000856785	0.0190073	up	1.72108
IMPDH1	1.11416	0.000874134	0.019267	up	1.71519
BRICD5	0.771168	0.000875756	0.019267	up	1.71519
APBA2	2.5509	0.000885715	0.0193808	up	1.71263
VMA21	0.60655	0.000885935	0.0193808	up	1.71263
ROBO2	3.54262	0.00088621	0.0193808	up	1.71263
EPDR1	1.01108	0.000894182	0.0194814	up	1.71038
HOXB6	3.03565	0.000905001	0.0196799	up	1.70598
LPL	3.44175	0.000907276	0.0197108	up	1.70529
PLXNB3	1.37404	0.000918415	0.0198967	up	1.70122
C6orf147	0.694194	0.000937144	0.0202105	up	1.69442
CLDN15	0.886947	0.000941561	0.0202679	up	1.69319
PCDHB16	2.03197	0.000941694	0.0202679	up	1.69319
NF2	0.808472	0.000943401	0.0202858	up	1.69281
TCF19	1.12305	0.000953486	0.0204371	up	1.68958
SH2B2	0.92509	0.000962066	0.0205544	up	1.68709
TRIM6	1.11007	0.000963017	0.0205544	up	1.68709
CKAP2L	1.04366	0.000984325	0.0209512	up	1.67879
PARP3	1.03241	0.00098739	0.020997	up	1.67784
SLC25A25	0.625295	0.000989989	0.0210099	up	1.67758
NEK4	0.594366	0.000997536	0.0210963	up	1.67579
RAD54L2	0.610087	0.00100029	0.0211049	up	1.67562
RALGPS1	1.18817	0.00100167	0.0211064	up	1.67559
GRAMD1C	1.76891	0.00101335	0.0212749	up	1.67213
COQ10B	0.614996	0.00102383	0.0213977	up	1.66963
C6orf1	0.789674	0.0010471	0.0216876	up	1.66379
BRAT1	0.639196	0.00105328	0.0217571	up	1.6624
LTB4R2	0.618328	0.00105585	0.0217832	up	1.66188
KCNJ16	2.84708	0.00107861	0.0221615	up	1.6544
FAM131B	3.08078	0.00108124	0.0221957	up	1.65373
RAD51C	0.691023	0.00108431	0.0222389	up	1.65289
COL19A1	2.53565	0.00110178	0.0225373	up	1.6471
TMCC2	0.983565	0.00110788	0.0226419	up	1.64509
TYW1B	1.01056	0.00111458	0.0227493	up	1.64303
ZNF850	0.82351	0.00111563	0.0227493	up	1.64303
DAPK2	1.36756	0.00112456	0.0228973	up	1.64022
RELB	1.19089	0.00113215	0.0229285	up	1.63962
ADD2	2.63801	0.00113245	0.0229285	up	1.63962
SFMBT1	0.839494	0.00113336	0.0229285	up	1.63962
LPPR4	3.16309	0.00114508	0.0230956	up	1.63647
KIAA0895	0.767111	0.00114692	0.0231126	up	1.63615
SPDYE6	0.848363	0.00115502	0.0231843	up	1.63481
KIAA1467	0.891326	0.00116526	0.0233144	up	1.63238
FAM102A	0.848916	0.00117418	0.0234064	up	1.63067
PGBD1	0.69751	0.00117593	0.0234112	up	1.63058
ZNF585A	0.614104	0.00118215	0.0234945	up	1.62903
PPP2R2B	1.61255	0.00118969	0.0235633	up	1.62776
ZNF829	0.667528	0.00121702	0.0240015	up	1.61976
ZNF862	0.931851	0.00121834	0.0240071	up	1.61966
C9orf172	1.12043	0.00123741	0.0242382	up	1.6155
GALNT15	0.864124	0.00124612	0.0243468	up	1.61356
TNFAIP6	2.19991	0.00124822	0.0243672	up	1.61319
NKX2-5	2.25044	0.00126015	0.0244313	up	1.61205
DDRGK1	0.656446	0.00129295	0.024966	up	1.60265
HOXD3	1.7736	0.00130257	0.0250526	up	1.60115
ZNF701	0.907001	0.00130874	0.0251387	up	1.59966
RGS14	1.10065	0.00131821	0.0252218	up	1.59822
WNT3	0.768779	0.0013202	0.0252389	up	1.59793
ERICH2	1.05309	0.0013238	0.0252868	up	1.59711
SBNO2	0.756576	0.00132941	0.0253521	up	1.59599
HSD3BP4	0.862729	0.00133322	0.0253894	up	1.59535
GAS8	0.671743	0.00134702	0.0256034	up	1.5917
LOC100133091	0.773754	0.00135446	0.0257063	up	1.58996
LHFPL4	2.4777	0.00136798	0.025907	up	1.58658
NEAT1	2.13436	0.0013686	0.025907	up	1.58658
MB21D1	1.78586	0.00137168	0.0259381	up	1.58606
TRIM4	0.838418	0.00137599	0.0259543	up	1.58579
UPP1	1.61946	0.00140205	0.0263458	up	1.57929
UCKL1-AS1	0.783224	0.00142341	0.0265957	up	1.57519
DONSON	0.802945	0.00143931	0.0268492	up	1.57107
ZNF347	1.10548	0.00144097	0.0268585	up	1.57092
BCAP31	0.601431	0.0014462	0.0269126	up	1.57005
LOC103091866	0.742197	0.0014493	0.0269486	up	1.56946
VAMP4	0.744854	0.00145464	0.0269827	up	1.56891
IFT22	0.744174	0.00147529	0.0273218	up	1.56349
KIAA0226L	2.30261	0.00149158	0.0275052	up	1.56059
ASAP2	0.80784	0.00149391	0.0275123	up	1.56047
CC2D1A	0.597986	0.00149841	0.0275657	up	1.55963
HPCAL1	1.4849	0.00149949	0.0275657	up	1.55963
TRPC3	1.19077	0.00150441	0.0275676	up	1.5596
BVES-AS1	0.701841	0.00150647	0.0275676	up	1.5596
DOLPP1	0.636021	0.00151769	0.0276936	up	1.55762
NACAD	0.975755	0.00151815	0.0276936	up	1.55762
HLA-G	1.22696	0.00154528	0.0280124	up	1.55265
FOXF2	1.42008	0.00154654	0.0280124	up	1.55265
MYO5B	2.08924	0.00159692	0.0286999	up	1.54212
FGF14	1.99917	0.00160873	0.0288671	up	1.5396
FAM110A	1.03079	0.0016111	0.0288872	up	1.53929
CD207	0.792912	0.00162432	0.0290566	up	1.53675
MTCP1	0.65879	0.00162626	0.0290688	up	1.53657
MICAL3	0.915945	0.00163323	0.0291258	up	1.53572
STAG3L5P-PVRIG2P-PILRB	0.646679	0.00163706	0.0291716	up	1.53504
NRGN	1.71476	0.00164169	0.0292089	up	1.53448
ZNF460	1.14573	0.00164524	0.029227	up	1.53422
CNTN1	3.14711	0.00165044	0.029252	up	1.53384
DYNLL2	0.686422	0.00165496	0.029267	up	1.53362
TUB	1.05409	0.00165517	0.029267	up	1.53362
PDE4D	2.08083	0.00167484	0.0294583	up	1.53079
KIF21B	2.17934	0.0016878	0.0295736	up	1.5291
SUCO	0.669593	0.00170748	0.0297734	up	1.52617
LOC728819	0.840215	0.0017146	0.029862	up	1.52488
NFASC	3.01072	0.00172067	0.0299173	up	1.52408
NDOR1	0.71278	0.00173143	0.0299743	up	1.52325
AMH	1.54999	0.00175191	0.0302062	up	1.5199
FOXG1	2.93813	0.00175253	0.0302062	up	1.5199
MAMLD1	1.30267	0.0017637	0.0303735	up	1.51751
FERMT3	0.976197	0.0017823	0.0306481	up	1.5136
CYP51A1	0.697399	0.00180051	0.0308465	up	1.51079
C8orf46	1.35113	0.00180409	0.0308849	up	1.51025
RBM47	1.51197	0.00180683	0.030886	up	1.51024
CASC14	0.892505	0.00184934	0.0315426	up	1.5011
KIAA0319	0.94202	0.00186092	0.03167	up	1.49935
MBNL3	1.95247	0.00186725	0.0317543	up	1.4982
UBL4A	0.623806	0.00187707	0.031889	up	1.49636
CCL2	3.59301	0.00187793	0.031889	up	1.49636
IL13RA2	2.91016	0.00188909	0.0320313	up	1.49443
FBLN7	1.76785	0.00191299	0.0322708	up	1.49119
ACHE	1.70145	0.00194717	0.0326565	up	1.48603
LOC101929372	0.635846	0.00196452	0.0329236	up	1.48249
CHCHD3	0.626037	0.00198465	0.0331647	up	1.47932
PJA1	0.675538	0.00198699	0.0331798	up	1.47913
HEG1	0.869912	0.00199171	0.0332316	up	1.47845
SOX9	0.886746	0.00201371	0.033529	up	1.47458
TOPBP1	0.671101	0.00201757	0.0335448	up	1.47438
KLHL7	0.673258	0.00203921	0.0338073	up	1.47099
NFIL3	1.04046	0.00207304	0.0342698	up	1.46509
SLC37A2	0.785063	0.00210137	0.0347132	up	1.45951
ZNF665	0.78406	0.00212397	0.0349864	up	1.4561
LOC728730	0.603568	0.00212819	0.0350156	up	1.45574
TPD52	1.77025	0.00213244	0.035051	up	1.4553
SENP1	0.603555	0.00217883	0.0356939	up	1.44741
ELAVL3	2.70428	0.00218032	0.0356939	up	1.44741
TMX4	0.656285	0.00220596	0.035927	up	1.44458
TTC39C	0.727599	0.00221677	0.0360269	up	1.44337
TECPR1	0.671042	0.0022248	0.0361319	up	1.44211
TIAM1	0.937907	0.00223138	0.0361906	up	1.4414
LINC01116	1.61995	0.00225362	0.0364462	up	1.43835
HLA-F	1.65223	0.00226048	0.0365315	up	1.43733
CA5BP1	0.801567	0.00226419	0.0365524	up	1.43708
PHF19	0.774956	0.00226652	0.0365524	up	1.43708
CDKN2D	0.957284	0.00227185	0.0366128	up	1.43637
IQCG	0.889119	0.00229393	0.0368914	up	1.43307
ZNF630	1.0692	0.00229664	0.0369089	up	1.43287
APCDD1	2.0694	0.0022984	0.0369089	up	1.43287
C18orf8	0.657529	0.00229982	0.0369089	up	1.43287
HOXC11	0.845165	0.00230465	0.0369608	up	1.43226
SCN3A	2.24054	0.00233218	0.0372869	up	1.42844
ABCB4	2.03559	0.00233306	0.0372869	up	1.42844
FMNL3	1.07298	0.00233943	0.037363	up	1.42756
LOC101928847	0.812197	0.00234812	0.03745	up	1.42655
ETNK2	1.15537	0.00235633	0.037529	up	1.42563
LIMK1	0.866014	0.00237474	0.0377701	up	1.42285
PKIB	2.33947	0.0023939	0.0380226	up	1.41996
MGAT5B	1.71645	0.00240753	0.0381865	up	1.41809
NDRG1	2.68226	0.00241658	0.0382599	up	1.41726
ZIC4	1.39168	0.00242047	0.0382865	up	1.41695
ONECUT2	1.83936	0.00247634	0.0389568	up	1.40942
ZNF506	0.887121	0.00248406	0.0390093	up	1.40883
PIWIL4	0.745407	0.00248474	0.0390093	up	1.40883
HOXD13	2.29522	0.00249183	0.0390848	up	1.40799
BVES	2.76916	0.00251913	0.0393884	up	1.40463
ZNF682	0.832888	0.00252098	0.0393907	up	1.40461
SAMD9	1.81961	0.00254495	0.03971	up	1.4011
SYNJ1	0.594778	0.00255904	0.0397464	up	1.4007
POLR2J4	0.676009	0.00257338	0.0399124	up	1.39889
PLEKHA2	0.73914	0.00260921	0.0403058	up	1.39463
WNK3	0.811651	0.00263505	0.0405963	up	1.39151
CFLAR	0.743905	0.00265175	0.040772	up	1.38964
STXBP1	0.618572	0.00266053	0.0408414	up	1.3889
TPST1	0.656908	0.00266416	0.040854	up	1.38877
GPR1	0.725972	0.00267466	0.0409878	up	1.38735
GPRIN1	1.09884	0.00267908	0.0410283	up	1.38692
RPS6KA3	0.922099	0.00268741	0.0411286	up	1.38586
SLC4A4	2.67695	0.00268948	0.041133	up	1.38581
SLC44A1	0.600631	0.00271004	0.0412841	up	1.38422
DTX1	2.26724	0.00272989	0.041531	up	1.38163
POPDC2	0.612732	0.00274263	0.0416236	up	1.38066
EPOR	0.833593	0.00274318	0.0416236	up	1.38066
IQGAP3	0.960224	0.00275121	0.0416906	up	1.37996
TCTN2	0.66276	0.00277436	0.0418895	up	1.3779
KRBOX4	0.590537	0.00277884	0.0418895	up	1.3779
BTN2A2	0.729125	0.00280958	0.0422975	up	1.37368
WDR62	1.16273	0.00283368	0.0425748	up	1.37085
LMTK2	0.605004	0.00283562	0.0425748	up	1.37085
ZNF486	1.03941	0.00283721	0.0425748	up	1.37085
PRKCQ	1.2871	0.00284296	0.0426057	up	1.37053
IDH3A	0.611763	0.00285113	0.0426727	up	1.36985
ESAM	0.608804	0.00286351	0.0427472	up	1.36909
SOGA1	0.81424	0.00287426	0.0428315	up	1.36824
CBFA2T2	0.604205	0.00287684	0.0428315	up	1.36824
LOC101928767	0.764739	0.00291142	0.043197	up	1.36455
INADL	1.35678	0.00291879	0.0432093	up	1.36442
PCDHB3	1.95467	0.00292597	0.0432602	up	1.36391
DMTN	1.68561	0.0029279	0.043261	up	1.3639
TMEM178B	2.31454	0.00294367	0.0433276	up	1.36324
PALM3	1.12177	0.00295528	0.0434155	up	1.36236
GCLM	1.07345	0.00296381	0.0435132	up	1.36138
NBPF3	0.80031	0.00297084	0.0435611	up	1.3609
RAD23A	0.598284	0.00297992	0.0436388	up	1.36013
C1QL4	1.40842	0.00298605	0.0436731	up	1.35979
GPM6A	3.32018	0.0030016	0.0438728	up	1.3578
PSRC1	1.11261	0.00303099	0.044166	up	1.35491
GLA	0.72562	0.00303122	0.044166	up	1.35491
NAMPT	1.17254	0.00310831	0.04509	up	1.34592
SNAP25-AS1	0.935096	0.00314128	0.0455075	up	1.34192
THEMIS2	0.987427	0.003143	0.0455075	up	1.34192
SLCO3A1	2.39615	0.00314625	0.045526	up	1.34174
HOXB2	2.60098	0.00315431	0.045614	up	1.3409
CDK16	0.612207	0.00317155	0.0457774	up	1.33935
LY75	1.46441	0.00318794	0.0459278	up	1.33792
TRAF2	0.723611	0.00320689	0.0461145	up	1.33616
ALOX12P2	0.938651	0.00323738	0.0464038	up	1.33345
ACSL1	1.29579	0.00324341	0.0464038	up	1.33345
MAP3K10	0.730018	0.00324384	0.0464038	up	1.33345
FGF13	2.11937	0.00324425	0.0464038	up	1.33345
PEAK1	0.926141	0.0032471	0.0464038	up	1.33345
CIITA	1.43141	0.00326096	0.0465507	up	1.33207
ZNF775	0.635884	0.00326515	0.0465753	up	1.33184
DSN1	0.833567	0.00327653	0.0467088	up	1.3306
TAPBPL	0.991859	0.00328782	0.0468407	up	1.32938
TRIM24	0.876643	0.00335197	0.0474038	up	1.32419
UGT8	1.17313	0.0033795	0.0477638	up	1.3209
SPDYE7P	0.702892	0.00342663	0.0481633	up	1.31728
GXYLT2	1.30891	0.00343342	0.0482015	up	1.31694
PRUNE2	1.85189	0.0034384	0.0482128	up	1.31684
MTBP	0.682084	0.00344538	0.0482813	up	1.31622
TCEAL7	1.63869	0.00345161	0.0483394	up	1.3157
LOC101926963	0.656245	0.00345764	0.048365	up	1.31547
OLIG2	3.59491	0.00346269	0.0484063	up	1.3151
CCDC144B	1.31044	0.00347399	0.048447	up	1.31473
CHDH	1.35011	0.00354595	0.0491832	up	1.30818
HOXB8	2.46132	0.00357244	0.0494912	up	1.30547
CCHCR1	0.58827	0.0035785	0.0495454	up	1.305
NR6A1	0.707246	0.00358237	0.0495694	up	1.30479
NCK1-AS1	0.619089	0.00358975	0.049612	up	1.30441
BRINP2	2.3488	0.00360076	0.0496869	up	1.30376
SLC43A3	1.62708	0.00360162	0.0496869	up	1.30376
USP32P2	1.30703	0.00362174	0.0497818	up	1.30293
CCNO	1.20244	0.00363468	0.0499045	up	1.30186
TMEM86A	1.04626	0.00364366	0.0499684	up	1.3013
DIO3	-0.200173	1.45e-08	4.72e-06	stable	5.32582
CDK13	0.583666	1.63e-08	5.16e-06	stable	5.28746
LOC151174	-0.416173	3.21e-08	8.54e-06	stable	5.06863
CCDC67	-0.509594	4.92e-08	1.16e-05	stable	4.9362
LINC01123	-0.168174	5.11e-08	1.17e-05	stable	4.9313
TEX36	-0.303436	7.15e-08	1.53e-05	stable	4.81547
SLC35F3	-0.479973	8.83e-08	1.79e-05	stable	4.74762
KCNK18	-0.141289	8.92e-08	1.79e-05	stable	4.747
TLL1	-0.397521	9.27e-08	1.84e-05	stable	4.73627
EPHA6	-0.584446	1.1e-07	2.01e-05	stable	4.69634
ART5	-0.519925	1.35e-07	2.35e-05	stable	4.62967
SLC25A44	0.578793	1.74e-07	2.82e-05	stable	4.54925
RIPK3	-0.363189	1.95e-07	3.02e-05	stable	4.51961
HCRTR2	-0.115289	5.28e-07	6.89e-05	stable	4.16197
ATXN8OS	-0.0807933	5.33e-07	6.91e-05	stable	4.16051
RNF212	-0.409247	7.58e-07	9.07e-05	stable	4.04228
OCA2	-0.394897	8.3e-07	9.68e-05	stable	4.01415
MYO16-AS1	-0.368954	8.35e-07	9.69e-05	stable	4.01381
NDUFA5	0.554043	1e-06	0.000113208	stable	3.94612
CCDC93	0.532119	1.05e-06	0.000116454	stable	3.93385
FCN2	-0.156755	1.33e-06	0.00014058	stable	3.85208
NWD2	-0.306683	1.48e-06	0.000151728	stable	3.81893
CNOT4	0.581616	1.55e-06	0.000156838	stable	3.80455
CYP26C1	-0.113372	1.82e-06	0.000176719	stable	3.75272
SLCO6A1	-0.0581862	2.77e-06	0.000248967	stable	3.60386
RALGAPB	0.534946	3.23e-06	0.00028105	stable	3.55122
RBBP5	0.512651	4.51e-06	0.000367932	stable	3.43423
ACTN3	-0.513217	4.8e-06	0.000385	stable	3.41454
RABGEF1	0.579376	5.04e-06	0.000397217	stable	3.40097
SLC7A10	-0.276675	5.12e-06	0.000400708	stable	3.39717
KCNG2	-0.344686	5.67e-06	0.000430392	stable	3.36614
TYW1	0.579021	5.93e-06	0.000444934	stable	3.3517
PROK2	-0.456842	5.98e-06	0.000446671	stable	3.35001
TMEM168	0.582567	6.1e-06	0.000448932	stable	3.34782
C2orf71	-0.345297	6.43e-06	0.00046827	stable	3.3295
RNF216	0.512363	7.96e-06	0.000545236	stable	3.26342
LOC101927347	-0.0302687	8.14e-06	0.000553041	stable	3.25724
BPIFB4	-0.307331	9.07e-06	0.000598277	stable	3.2231
RNF114	0.496552	9.89e-06	0.000643506	stable	3.19145
TRAPPC10	0.378861	1.09e-05	0.00069414	stable	3.15855
SAR1B	0.554348	1.17e-05	0.000731274	stable	3.13592
MATK	-0.455999	1.41e-05	0.000851643	stable	3.06974
POLM	0.536128	1.46e-05	0.000876472	stable	3.05726
MYO1F	-0.519326	1.49e-05	0.000886657	stable	3.05224
OSTCP1	0.469364	1.53e-05	0.00091038	stable	3.04078
FOXJ2	0.528117	1.56e-05	0.000920952	stable	3.03576
C14orf180	-0.224824	1.61e-05	0.000943481	stable	3.02527
MPPED1	-0.108649	1.66e-05	0.000966179	stable	3.01494
BRAF	0.512374	1.66e-05	0.000967114	stable	3.01452
LMBRD2	0.518726	1.78e-05	0.00102526	stable	2.98917
CAPSL	-0.256411	1.79e-05	0.00102597	stable	2.98887
YWHAEP7	-0.071038	1.97e-05	0.00111155	stable	2.95407
SBDS	0.548824	1.99e-05	0.0011147	stable	2.95284
ZNF800	0.511874	2.25e-05	0.00123076	stable	2.90983
LOC642366	-0.25928	2.34e-05	0.00127261	stable	2.89531
SBK3	-0.482976	2.36e-05	0.00128271	stable	2.89187
FAM110D	-0.510437	2.65e-05	0.00140402	stable	2.85263
RSBN1L	0.52265	2.72e-05	0.00143424	stable	2.84338
REL	0.569039	2.84e-05	0.0014847	stable	2.82836
SLIT2-IT1	-0.0922989	2.84e-05	0.0014847	stable	2.82836
MECP2	0.576357	2.97e-05	0.00153839	stable	2.81293
UBXN1	-0.51144	3.3e-05	0.0016786	stable	2.77505
LOC100506314	-0.368087	3.36e-05	0.00170145	stable	2.76918
SRPK2	0.528432	3.56e-05	0.00177984	stable	2.74962
USH1C	-0.076934	3.75e-05	0.00183884	stable	2.73546
WISP2	-0.514985	4.08e-05	0.00196888	stable	2.70578
C8orf34	-0.359358	4.36e-05	0.00207544	stable	2.68289
WIF1	-0.406899	4.48e-05	0.00211509	stable	2.67467
UHRF1BP1L	0.564287	4.55e-05	0.00212791	stable	2.67205
UBR5	-0.506802	4.93e-05	0.00226241	stable	2.64543
NSFL1C	0.574658	5.18e-05	0.00234769	stable	2.62936
TRPC6	-0.407303	5.62e-05	0.00250197	stable	2.60172
UBOX5	0.505869	5.75e-05	0.00254373	stable	2.59453
CBX3	0.584822	6.1e-05	0.00267107	stable	2.57332
RALA	0.462964	6.18e-05	0.00269852	stable	2.56887
RPL13AP3	-0.47421	7.32e-05	0.00310057	stable	2.50856
PRKAB1	0.521541	7.35e-05	0.00310217	stable	2.50833
FAM126B	0.406124	7.49e-05	0.00314389	stable	2.50253
MIR548H2	-0.0284955	7.62e-05	0.00319253	stable	2.49586
TBC1D22A	-0.512933	7.69e-05	0.00320394	stable	2.49432
STPG2-AS1	-0.116022	7.71e-05	0.00321021	stable	2.49347
SLC22A31	-0.245273	8.17e-05	0.00334019	stable	2.47623
MIR137HG	-0.489051	8.25e-05	0.00336503	stable	2.47301
OR2W3	-0.0396932	8.48e-05	0.00343984	stable	2.46346
FAU	-0.55439	8.63e-05	0.00349238	stable	2.45688
LHX8	-0.388242	9.96e-05	0.0039041	stable	2.40848
SPDYE1	0.583977	0.000101745	0.00398256	stable	2.39984
LINC00911	-0.0230407	0.000103162	0.00401709	stable	2.39609
LINC01115	-0.0371585	0.000103323	0.00401709	stable	2.39609
CASQ2	-0.582067	0.000103733	0.00402458	stable	2.39528
CAPZA2	0.525599	0.000108907	0.00417097	stable	2.37976
USP4	0.494112	0.000115395	0.00438162	stable	2.35836
RGS9BP	0.501004	0.000126395	0.00470802	stable	2.32716
UTS2R	-0.176069	0.000128091	0.0047616	stable	2.32225
UBE3C	0.571573	0.000129492	0.00479243	stable	2.31944
BPIFB3	-0.0384515	0.00013861	0.00504898	stable	2.2968
ZNF212	0.549015	0.000145446	0.00524015	stable	2.28066
OR5AU1	-0.126236	0.000148632	0.00532172	stable	2.27395
KIF3A	0.48763	0.000166422	0.00584097	stable	2.23352
DDX56	0.550544	0.000167072	0.00585486	stable	2.23248
NLRP7	-0.0637007	0.000168016	0.0058746	stable	2.23102
LINC00923	0.565472	0.000170618	0.00594305	stable	2.22599
ZNF746	0.506633	0.000173996	0.00602438	stable	2.22009
RPS18P9	-0.568265	0.000177962	0.00611586	stable	2.21354
LIX1L	-0.500008	0.000181717	0.00623522	stable	2.20515
KANSL3	0.364551	0.000185656	0.00630506	stable	2.20031
TMEM139	0.572257	0.000191681	0.00641548	stable	2.19277
LOC100287728	-0.0522505	0.000200022	0.00661791	stable	2.17928
OCRL	0.574981	0.000205643	0.00673632	stable	2.17158
ZNF761	0.56192	0.000209466	0.00682287	stable	2.16603
RNF14	0.415669	0.000213128	0.00688388	stable	2.16217
BAP1	0.478768	0.00021925	0.00698975	stable	2.15554
CSRNP2	0.570663	0.0002344	0.00734069	stable	2.13426
NRF1	0.498067	0.000236312	0.00738244	stable	2.1318
RPL15	-0.537957	0.000242594	0.00751001	stable	2.12436
SNORD116-23	-0.0733414	0.000249633	0.00764934	stable	2.11638
RBM18	0.514728	0.000251092	0.00768043	stable	2.11461
CFD	-0.528554	0.000263793	0.00798431	stable	2.09776
AMHR2	-0.0402187	0.00026734	0.00807051	stable	2.0931
MRPL53	-0.419608	0.000274246	0.00821134	stable	2.08559
MEMO1	-0.344961	0.000274778	0.00821134	stable	2.08559
TDRD9	-0.153961	0.000274849	0.00821134	stable	2.08559
METTL21EP	-0.249706	0.000277648	0.00828423	stable	2.08175
TBC1D25	0.561847	0.00028915	0.00853916	stable	2.06858
VPS36	-0.57063	0.000290685	0.00857355	stable	2.06684
AIM1L	-0.525511	0.000295305	0.00868762	stable	2.0611
OR2L1P	-0.0201184	0.000297064	0.00872822	stable	2.05907
SCGN	-0.358908	0.000317098	0.00918827	stable	2.03677
C12orf65	0.442037	0.000323179	0.00929666	stable	2.03167
ZNF816-ZNF321P	-0.0230976	0.000329366	0.00941383	stable	2.02623
LIPK	-0.0194679	0.00034584	0.00973513	stable	2.01166
LINC00395	-0.0195416	0.000355061	0.00992708	stable	2.00318
MIR412	-0.0195416	0.000355061	0.00992708	stable	2.00318
ZBTB43	0.512571	0.000369542	0.0102084	stable	1.99104
B3GNT8	-0.411811	0.000381093	0.0104524	stable	1.98078
MIR7156	-0.0181823	0.000383214	0.0104857	stable	1.9794
PDAP1	0.475593	0.00039185	0.0106714	stable	1.97178
PRSS56	-0.488844	0.000410498	0.0110878	stable	1.95516
ZNF44	0.527716	0.000414486	0.0111564	stable	1.95248
THUMPD3	0.405587	0.000416614	0.0111878	stable	1.95126
CCDC63	-0.0767117	0.000418024	0.0111994	stable	1.95081
BCORL1	0.518525	0.000445202	0.0117271	stable	1.93081
LINC00942	-0.472753	0.000451751	0.0118419	stable	1.92658
RPL23P8	-0.204603	0.000464867	0.012117	stable	1.91661
FBP1	-0.388117	0.000474521	0.0123163	stable	1.90952
WNT8B	-0.408212	0.000474647	0.0123163	stable	1.90952
ATP6V1F	0.549539	0.000499606	0.0127632	stable	1.89404
PURB	0.50383	0.000514397	0.0130465	stable	1.88451
ZNF569	0.554411	0.000522121	0.0132069	stable	1.8792
TRHR	-0.226824	0.000527922	0.0132953	stable	1.8763
MMGT1	0.441748	0.000529425	0.0133187	stable	1.87554
C7orf25	0.56694	0.000533026	0.0133781	stable	1.87361
C2CD2L	0.575732	0.000539718	0.0134749	stable	1.87048
SLC31A1	0.570291	0.000544013	0.0135674	stable	1.8675
ZNF398	0.555842	0.000545109	0.0135801	stable	1.8671
SEC11A	-0.522283	0.000549712	0.01368	stable	1.86391
LOC101927410	-0.0679757	0.000559898	0.0138737	stable	1.85781
CCSER1	-0.100541	0.000569768	0.0140579	stable	1.85208
ZNF700	0.559795	0.000574888	0.0141691	stable	1.84866
NCOA4	-0.505544	0.00057798	0.0141999	stable	1.84772
ATP2C1	0.487871	0.000588317	0.0143995	stable	1.84165
HPN	-0.114936	0.000604509	0.014649	stable	1.83419
APTR	0.582076	0.000606343	0.0146781	stable	1.83333
RAB22A	0.491512	0.000616555	0.0148572	stable	1.82806
DDX59	0.425688	0.000619925	0.0148976	stable	1.82688
FTSJ2	0.580122	0.000621401	0.0149175	stable	1.8263
GNA11	0.508587	0.000640662	0.0152845	stable	1.81575
HIATL1	0.529882	0.000670379	0.0158787	stable	1.79919
ORC5	0.561674	0.000690405	0.016187	stable	1.79083
GLIS2	-0.551339	0.000693656	0.0162468	stable	1.78923
PRG4	-0.247745	0.000694893	0.0162592	stable	1.7889
ADRM1	0.453392	0.00069987	0.0163591	stable	1.78624
CCIN	0.443061	0.000700757	0.0163633	stable	1.78613
RAET1K	0.510659	0.00070833	0.0164735	stable	1.78321
OPA3	0.557204	0.000728944	0.016877	stable	1.7727
ABCF2	0.573289	0.00072958	0.016877	stable	1.7727
GZF1	0.432146	0.000739182	0.0170027	stable	1.76948
ACOT8	0.52829	0.000755865	0.0173518	stable	1.76065
HSPA13	0.452706	0.000762363	0.0174836	stable	1.75737
GPKOW	0.507956	0.000764249	0.0175095	stable	1.75673
FBXW2	0.514766	0.000771124	0.0176146	stable	1.75413
TMEM203	0.350315	0.000786037	0.0178879	stable	1.74744
GNL1	0.440272	0.000786176	0.0178879	stable	1.74744
CASP10	0.544032	0.000793807	0.0180257	stable	1.74411
CXorf56	0.552768	0.000809352	0.0182744	stable	1.73816
CENPB	0.567892	0.000812778	0.0183304	stable	1.73683
EIF3D	-0.482578	0.000821039	0.0184891	stable	1.73308
CXorf40B	0.566045	0.000824441	0.0185356	stable	1.73199
KLRG2	-0.128166	0.000825153	0.0185356	stable	1.73199
MTG2	0.506358	0.000838517	0.018728	stable	1.72751
WIPI2	0.405681	0.000855231	0.0190073	stable	1.72108
DPP9	0.572278	0.00085592	0.0190073	stable	1.72108
SLC41A1	0.584064	0.000858463	0.0190262	stable	1.72065
LPGAT1	0.521351	0.000862337	0.0190755	stable	1.71952
TMEM258	-0.402905	0.000864454	0.019104	stable	1.71888
YME1L1	-0.517766	0.000875746	0.019267	stable	1.71519
DERL1	0.462411	0.000879331	0.0193219	stable	1.71395
SAR1A	-0.543243	0.000887064	0.0193811	stable	1.71262
YTHDF1	0.408385	0.000889362	0.019413	stable	1.71191
KCNA7	0.52204	0.000891116	0.0194329	stable	1.71146
BLOC1S2	-0.43467	0.000902385	0.0196415	stable	1.70682
PRADC1	0.532176	0.000909095	0.0197152	stable	1.7052
GCM1	0.333295	0.000909183	0.0197152	stable	1.7052
KLK13	-0.0135696	0.000920628	0.0199146	stable	1.70083
OTUD7B	0.408115	0.000920966	0.0199146	stable	1.70083
PMS2CL	0.414096	0.000931165	0.0201163	stable	1.69645
MED22	0.573578	0.000937274	0.0202105	stable	1.69442
TNFRSF8	-0.256605	0.000948222	0.0203615	stable	1.69119
AMELY	-0.0134911	0.000948686	0.0203615	stable	1.69119
CCDC148	0.384866	0.000954154	0.0204371	stable	1.68958
ABCC6P1	-0.569525	0.000954862	0.0204371	stable	1.68958
YIPF6	0.506925	0.000962705	0.0205544	stable	1.68709
FAM199X	0.549022	0.000982087	0.0209228	stable	1.67938
MIR4664	-0.0512669	0.000990723	0.0210099	stable	1.67758
POLR3F	0.543763	0.00100069	0.0211049	stable	1.67562
LOC102723854	-0.350276	0.00101924	0.021341	stable	1.67079
TFEC	-0.107045	0.00101927	0.021341	stable	1.67079
ALKBH4	0.516552	0.00102213	0.0213815	stable	1.66996
ATP1A4	-0.58334	0.00103063	0.0215203	stable	1.66715
CEP350	0.334848	0.00104444	0.021678	stable	1.66398
NKAIN2	-0.195888	0.00104463	0.021678	stable	1.66398
FAM208A	0.453958	0.00104507	0.021678	stable	1.66398
TCERG1L	-0.330794	0.00104569	0.021678	stable	1.66398
OSBPL11	0.517151	0.00105311	0.0217571	stable	1.6624
FABP1	-0.0131385	0.00107764	0.0221612	stable	1.65441
LOC401177	-0.0131385	0.00107764	0.0221612	stable	1.65441
SMIM7	0.373281	0.00108735	0.0222815	stable	1.65206
EPYC	-0.0525796	0.00112571	0.0228973	stable	1.64022
TMED4	0.564159	0.00112875	0.0229063	stable	1.64005
RPL13P5	0.552114	0.00113423	0.0229285	stable	1.63962
C4orf22	-0.0787479	0.00115529	0.0231843	stable	1.63481
MIR5000	-0.017557	0.0011555	0.0231843	stable	1.63481
PARD3-AS1	-0.150788	0.00115681	0.0231905	stable	1.63469
INIP	0.481113	0.00116164	0.023267	stable	1.63326
SPNS3	-0.0910305	0.00117468	0.0234064	stable	1.63067
AKR1C2	-0.174944	0.00117922	0.0234564	stable	1.62974
EXOC8	0.422785	0.00118525	0.0235157	stable	1.62864
DMTF1	0.565545	0.0011912	0.023573	stable	1.62759
CTDSP1	-0.505133	0.00120527	0.0238104	stable	1.62323
FAM149B1	-0.512559	0.00120732	0.0238307	stable	1.62286
VKORC1L1	0.560645	0.00122369	0.0240841	stable	1.61827
PMS2	0.56067	0.00122433	0.0240841	stable	1.61827
SSTR5	-0.0752015	0.0012311	0.0241637	stable	1.61684
FOLR4	-0.0178401	0.00123139	0.0241637	stable	1.61684
C1QTNF8	-0.0938616	0.00123152	0.0241637	stable	1.61684
CYFIP1	-0.539488	0.00123268	0.0241659	stable	1.6168
RNF5P1	-0.55643	0.00124164	0.0242856	stable	1.61465
ZC3HC1	0.433184	0.00124194	0.0242856	stable	1.61465
USP9X	0.548815	0.0012532	0.0244029	stable	1.61256
SERF2	-0.506291	0.00125555	0.0244094	stable	1.61244
GPR152	0.32084	0.00125567	0.0244094	stable	1.61244
PHF2	0.459228	0.00125774	0.0244291	stable	1.61209
UBE2D4	0.543104	0.00126102	0.0244313	stable	1.61205
LOC100131347	-0.486458	0.00129169	0.0249626	stable	1.60271
POM121	0.566342	0.00129476	0.0249746	stable	1.6025
VPS16	0.560739	0.00129611	0.0249746	stable	1.6025
MARCO	-0.29521	0.00129664	0.0249746	stable	1.6025
CEACAM3	-0.0189272	0.00130286	0.0250526	stable	1.60115
HSF2BP	0.479076	0.00130996	0.0251387	stable	1.59966
CBWD1	0.52996	0.0013106	0.0251387	stable	1.59966
ZNF799	0.563568	0.00131745	0.0252218	stable	1.59822
PRPH2	-0.536312	0.00133357	0.0253894	stable	1.59535
UBN2	0.542225	0.00136793	0.025907	stable	1.58658
TAF1	0.576284	0.00137268	0.0259381	stable	1.58606
NAP1L1	-0.521843	0.00137672	0.0259543	stable	1.58579
ANKRD61	0.482155	0.00137808	0.0259586	stable	1.58572
ANKLE2	0.396096	0.00139239	0.0261855	stable	1.58194
GPR107	0.558576	0.00140914	0.026436	stable	1.5778
HPS5	-0.45703	0.00141437	0.0264914	stable	1.5769
SFTA3	-0.0496105	0.00141712	0.026521	stable	1.57641
NDUFB2-AS1	0.411523	0.00142057	0.0265641	stable	1.5757
INTS1	0.556064	0.00143489	0.0267884	stable	1.57205
LOC101927811	0.503555	0.00146784	0.0272058	stable	1.56534
ATXN3	-0.520813	0.00147939	0.0273759	stable	1.56263
TBC1D20	0.46687	0.00148805	0.0274701	stable	1.56114
POC5	0.441307	0.00149234	0.0275052	stable	1.56059
SLC37A3	0.518262	0.00150074	0.0275657	stable	1.55963
LOC728752	0.548591	0.00150159	0.0275657	stable	1.55963
MMAA	-0.580193	0.0015036	0.0275676	stable	1.5596
TMEM238	-0.3555	0.00150543	0.0275676	stable	1.5596
STAG3L5P	0.260319	0.00151412	0.0276638	stable	1.55809
MRPL43	-0.48017	0.00152721	0.0278369	stable	1.55538
DDB1	-0.374363	0.00153117	0.027865	stable	1.55494
PCK1	-0.453925	0.00154448	0.0280124	stable	1.55265
FLJ41278	-0.0400686	0.00154649	0.0280124	stable	1.55265
TMEM110	0.455067	0.00156197	0.0282475	stable	1.54902
AP4M1	0.492914	0.00156973	0.0283502	stable	1.54744
WDR44	0.547779	0.0015701	0.0283502	stable	1.54744
MINPP1	-0.463606	0.00157553	0.0284154	stable	1.54645
CGGBP1	0.380542	0.00157664	0.0284154	stable	1.54645
LOC101926933	-0.117576	0.00158028	0.0284451	stable	1.54599
ELMOD3	0.535653	0.00158428	0.0284948	stable	1.54523
ARFRP1	0.471861	0.00160702	0.0288589	stable	1.53972
TACR3	-0.074808	0.00161323	0.0289029	stable	1.53906
ARF5	0.538831	0.00162104	0.0290205	stable	1.5373
PIK3R4	0.402508	0.00162816	0.0290803	stable	1.5364
GUCA1C	-0.0813728	0.00163286	0.0291258	stable	1.53572
PTPN1	0.405536	0.00164157	0.0292089	stable	1.53448
LOC101927040	0.52386	0.00164802	0.029243	stable	1.53398
LOC101929234	0.345635	0.00164867	0.029243	stable	1.53398
NDUFA8	0.480396	0.00165763	0.029267	stable	1.53362
PPTC7	0.504193	0.00166393	0.0293558	stable	1.53231
MCTS1	0.426029	0.00166591	0.0293684	stable	1.53212
ZBTB6	0.449436	0.00167085	0.0294329	stable	1.53117
DSTNP2	0.58426	0.00167418	0.0294583	stable	1.53079
KLK1	-0.284207	0.00168558	0.0295736	stable	1.5291
ZGPAT	0.398335	0.00168696	0.0295736	stable	1.5291
DMKN	-0.580083	0.00169181	0.0295991	stable	1.52872
RAB21	0.313205	0.00169523	0.0296139	stable	1.5285
ANKRD18B	0.406423	0.00169716	0.0296252	stable	1.52834
LOC646214	0.446718	0.00171933	0.0299173	stable	1.52408
MAVS	0.484265	0.00172185	0.0299173	stable	1.52408
CDC42SE2	0.426296	0.00172913	0.0299732	stable	1.52327
LSG1	0.577987	0.00173007	0.0299732	stable	1.52327
KLF1	-0.219198	0.00174702	0.0302062	stable	1.5199
CNTN5	-0.121745	0.00175004	0.0302062	stable	1.5199
EIF3A	-0.582423	0.00175268	0.0302062	stable	1.5199
BRD7P3	0.2478	0.00178624	0.0306545	stable	1.51351
SUGT1	-0.538664	0.00182134	0.031111	stable	1.50709
ZNF280D	-0.530412	0.00183314	0.0312894	stable	1.5046
CHP1	-0.446012	0.00189647	0.0321094	stable	1.49337
CES1	-0.519841	0.00190425	0.0321702	stable	1.49255
C7orf73	0.461799	0.00191508	0.0322824	stable	1.49103
KDM5B	-0.536338	0.00192283	0.0323889	stable	1.4896
ANKRD20A9P	0.558978	0.00192421	0.0323889	stable	1.4896
COMP	-0.206485	0.00192618	0.0323986	stable	1.48947
RPL27	-0.56971	0.00193917	0.0325695	stable	1.48719
USP37	0.530951	0.00194347	0.0326181	stable	1.48654
PMS2P1	0.441249	0.00197861	0.0331117	stable	1.48002
SLC25A5-AS1	0.536813	0.00198225	0.0331485	stable	1.47954
BLOC1S3	0.487933	0.00199406	0.0332316	stable	1.47845
LOC101927374	0.464002	0.00199441	0.0332316	stable	1.47845
TIAL1	-0.512007	0.00201608	0.0335442	stable	1.47438
MANSC4	-0.108266	0.00203035	0.033733	stable	1.47195
FAM73B	0.538293	0.00203596	0.0337777	stable	1.47137
SIRT1	-0.545633	0.00204491	0.0338775	stable	1.47009
SCGB3A1	-0.0711067	0.0021035	0.0347235	stable	1.45938
ZNF184	0.573862	0.00210676	0.0347525	stable	1.45901
BANK1	-0.390277	0.00212137	0.0349686	stable	1.45632
TUBG2	0.558027	0.00212877	0.0350156	stable	1.45574
TMEM212	0.483794	0.00213547	0.0350759	stable	1.45499
GPATCH11	0.466287	0.00215818	0.0354235	stable	1.45071
PLIN4	0.55082	0.00218419	0.0356939	stable	1.44741
CYB561D2	0.489679	0.0021847	0.0356939	stable	1.44741
PNISR	-0.471896	0.00219297	0.035777	stable	1.4464
ZC3H6	0.531447	0.00220752	0.035927	stable	1.44458
BPIFB2	-0.127994	0.00221306	0.0359918	stable	1.4438
TCTN3	-0.471156	0.00223198	0.0361906	stable	1.4414
HCG27	0.517505	0.00226522	0.0365524	stable	1.43708
DGUOK-AS1	-0.3488	0.00232434	0.0372244	stable	1.42917
FAM220A	0.475277	0.0023478	0.03745	stable	1.42655
TRIM37	0.34081	0.00235374	0.0375136	stable	1.42581
MYL1	-0.207113	0.00238008	0.037829	stable	1.42218
RIOK2	-0.455631	0.00243142	0.0384334	stable	1.41529
ADAT1	0.567728	0.00246053	0.0388138	stable	1.41101
TMEM79	0.548115	0.00247015	0.0389125	stable	1.40991
DKFZp434J0226	-0.0861048	0.00248117	0.0390061	stable	1.40887
APMAP	0.461854	0.00249294	0.0390848	stable	1.40799
C7orf60	0.580715	0.00249821	0.0391144	stable	1.40766
LINC01106	-0.393212	0.0025399	0.0396595	stable	1.40165
IKZF5	-0.521923	0.00254657	0.03971	stable	1.4011
MPC2	0.523241	0.00255164	0.0397464	stable	1.4007
LDLRAD2	-0.200322	0.00255662	0.0397464	stable	1.4007
ARMC8	0.338585	0.00255834	0.0397464	stable	1.4007
PRKRIP1	0.383701	0.00257059	0.0398959	stable	1.39907
WNT16	0.337309	0.00257609	0.0399277	stable	1.39873
HIST2H2BA	0.574465	0.00259302	0.0401362	stable	1.39646
ADH5	-0.437846	0.00259779	0.0401831	stable	1.39596
DNAJB6	0.41706	0.00260458	0.0402612	stable	1.39511
ZBTB21	0.571306	0.00261543	0.0403748	stable	1.39389
NDST2	-0.406847	0.00262883	0.0405546	stable	1.39196
LINC01232	0.452573	0.00263085	0.0405586	stable	1.39192
TUSC2	0.423567	0.00263918	0.0406328	stable	1.39112
ZNF443	0.526679	0.00264229	0.0406537	stable	1.3909
DIS3L	0.55514	0.00266157	0.0408414	stable	1.3889
LOC100652770	-0.0908704	0.00269674	0.0412168	stable	1.38493
MPHOSPH8	-0.4277	0.00270192	0.0412414	stable	1.38467
TMEM164	0.476855	0.00271009	0.0412841	stable	1.38422
CAPRIN1	-0.303457	0.00272289	0.0414518	stable	1.38246
LOC100630923	0.387733	0.00274539	0.0416297	stable	1.3806
NRSN2	0.581366	0.00275389	0.0417038	stable	1.37982
ATAD1	-0.486899	0.00276507	0.0418456	stable	1.37835
CASP8AP2	0.430848	0.00277749	0.0418895	stable	1.3779
RP9	0.575892	0.00282629	0.0425214	stable	1.37139
GPR83	-0.456812	0.00282871	0.0425301	stable	1.3713
WASH5P	0.475486	0.00284141	0.0426057	stable	1.37053
MED9	0.505683	0.00285102	0.0426727	stable	1.36985
USP27X-AS1	0.448601	0.00285471	0.0426987	stable	1.36959
MLLT10	-0.584671	0.00286028	0.0427472	stable	1.36909
IFNAR2	0.557542	0.00286214	0.0427472	stable	1.36909
EXOC4	0.370654	0.00287655	0.0428315	stable	1.36824
TATDN2	0.485564	0.00287843	0.0428315	stable	1.36824
CLCC1	0.39818	0.00289486	0.0430206	stable	1.36632
LOC101929086	0.4753	0.00291399	0.043197	stable	1.36455
MKRN1	0.400823	0.00291446	0.043197	stable	1.36455
ZNF674	0.475788	0.00291468	0.043197	stable	1.36455
FADS1	-0.464262	0.00291608	0.043197	stable	1.36455
LINC00622	0.475215	0.00292486	0.0432602	stable	1.36391
ISX	-0.0211664	0.00293423	0.0432923	stable	1.36359
DLGAP1-AS2	0.503723	0.00293564	0.0432923	stable	1.36359
LOC101927750	0.425686	0.00294362	0.0433276	stable	1.36324
ATP12A	-0.465499	0.00294806	0.0433395	stable	1.36312
LMBR1	0.450826	0.00294823	0.0433395	stable	1.36312
LOC101929181	0.342968	0.00297916	0.0436388	stable	1.36013
PIAS4	0.416645	0.00301977	0.044085	stable	1.35571
ZNF510	0.554414	0.00301994	0.044085	stable	1.35571
C5orf28	0.433545	0.0030257	0.0441411	stable	1.35516
TWISTNB	0.557952	0.00304501	0.0443388	stable	1.35322
FAM160B1	-0.500371	0.00304981	0.0443808	stable	1.35281
ZNF564	0.400715	0.00308717	0.0448679	stable	1.34806
PTPN9	-0.554528	0.00309638	0.0449734	stable	1.34704
CTD-2151A2.1	0.269479	0.00309981	0.044995	stable	1.34684
SYNE4	0.364974	0.0031574	0.0456301	stable	1.34075
USB1	0.384762	0.00316124	0.0456571	stable	1.34049
DIO3OS	-0.0192261	0.00317644	0.0458194	stable	1.33895
PBX2	-0.532193	0.00318679	0.0459278	stable	1.33792
BTBD2	-0.411319	0.00321239	0.0461362	stable	1.33596
TSR2	0.562304	0.00321738	0.046161	stable	1.33572
ARIH2	0.373906	0.00321812	0.046161	stable	1.33572
RIC8B	0.502703	0.00324707	0.0464038	stable	1.33345
ACOT13	0.511199	0.00329401	0.0468713	stable	1.32909
LOC101060019	-0.0800945	0.00329605	0.0468713	stable	1.32909
OSBPL5	-0.54889	0.00331421	0.047058	stable	1.32737
ECEL1	-0.377528	0.00331946	0.0470882	stable	1.32709
SLC30A7	0.408095	0.00332172	0.0470913	stable	1.32706
NAIF1	0.316001	0.00333405	0.0472261	stable	1.32582
LINC00035	-0.338513	0.00333532	0.0472261	stable	1.32582
C9orf37	0.450285	0.00334314	0.0473079	stable	1.32507
SI	-0.0210246	0.00339215	0.047867	stable	1.31996
SNORD49A	-0.174972	0.00340088	0.0479487	stable	1.31922
CPSF4	0.464103	0.0034136	0.0480986	stable	1.31787
ANKRD7	0.449445	0.0034208	0.048151	stable	1.31739
ZNF684	0.503645	0.00342149	0.048151	stable	1.31739
MFSD10	-0.436409	0.00342617	0.0481633	stable	1.31728
USO1	-0.476626	0.00345691	0.048365	stable	1.31547
ZRANB2	-0.374572	0.00346776	0.0484187	stable	1.31499
TYK2	0.536876	0.00346819	0.0484187	stable	1.31499
FAM230B	0.387169	0.00348478	0.0485682	stable	1.31365
FOXD4L5	0.547324	0.00349594	0.0486877	stable	1.31258
AFTPH	0.351725	0.00349757	0.0486877	stable	1.31258
PTP4A2	0.397819	0.00352529	0.0489849	stable	1.30994
ORAI2	0.504734	0.0035308	0.0490149	stable	1.30967
ZNF80	0.467479	0.00353169	0.0490149	stable	1.30967
CNNM2	-0.55942	0.00358966	0.049612	stable	1.30441
PSMB2	0.429267	0.00359344	0.0496333	stable	1.30423
RAP1GDS1	-0.47952	0.00361241	0.0497371	stable	1.30332
TMUB1	0.540594	0.00361364	0.0497371	stable	1.30332
PTPLAD1	-0.458517	0.00361387	0.0497371	stable	1.30332
RBM41	0.444944	0.00362359	0.0497818	stable	1.30293
FITM2	0.504557	0.0036402	0.0499506	stable	1.30146
ZC2HC1C	0.735528	0.00364927	0.0500156	stable	1.30089
INPP5D	-1.49785	0.00365437	0.0500558	stable	1.30055
SH3GL2	-0.518597	0.00365906	0.0500903	stable	1.30025
APOO	0.615117	0.00366189	0.0500994	stable	1.30017
FKBP15	0.433315	0.00367403	0.0502309	stable	1.29903
ANKRD36BP1	0.539951	0.00367586	0.0502309	stable	1.29903
ADA	-1.56676	0.00368096	0.0502709	stable	1.29868
WARS2	-0.535012	0.00368406	0.0502836	stable	1.29857
METAP2	-0.466447	0.00369171	0.0502936	stable	1.29849
PSPH	0.892712	0.00369309	0.0502936	stable	1.29849
TLE4	-1.22495	0.00369327	0.0502936	stable	1.29849
RPS10	-0.587026	0.00369351	0.0502936	stable	1.29849
SUB1	-0.424824	0.00370137	0.0503709	stable	1.29782
RIMS2	-1.85791	0.00371069	0.0504681	stable	1.29698
RGMB-AS1	-1.28597	0.00372426	0.0506228	stable	1.29565
SRSF5	-0.484432	0.00374119	0.0508229	stable	1.29394
KCNN4	-1.92472	0.00375859	0.0510039	stable	1.2924
KCNMB3	0.644966	0.00375893	0.0510039	stable	1.2924
RFC2	0.853821	0.00377106	0.0511385	stable	1.29125
FIRRE	1.08264	0.00377534	0.0511665	stable	1.29101
SLC25A14	0.513736	0.00378539	0.051246	stable	1.29034
ZNF625	0.580278	0.00378564	0.051246	stable	1.29034
ABCA9	0.526288	0.00378916	0.0512635	stable	1.29019
LRRC4C	1.92201	0.00379334	0.05129	stable	1.28997
PSD3	0.869014	0.00380032	0.0513544	stable	1.28942
LOC101928035	-0.020718	0.00380746	0.0513985	stable	1.28905
OSTC	-0.686788	0.00380927	0.0513985	stable	1.28905
SLC9A6	0.420509	0.00381026	0.0513985	stable	1.28905
ZNF765	0.474758	0.00381513	0.0514342	stable	1.28875
HOMER1	0.963554	0.00381839	0.0514481	stable	1.28863
ACTA2	-2.15989	0.00382681	0.0515314	stable	1.28793
HLX	0.930376	0.00383143	0.0515636	stable	1.28766
LOC100499489	0.825679	0.00383539	0.0515868	stable	1.28746
RPRD1B	0.302725	0.00384499	0.0516858	stable	1.28663
FNIP1	0.417405	0.00386223	0.0518873	stable	1.28494
LIN52	0.422912	0.00388001	0.0520813	stable	1.28332
ZNF567	0.462665	0.00388118	0.0520813	stable	1.28332
PRRC2A	0.282913	0.0038934	0.052215	stable	1.2822
VCL	-1.08973	0.00390944	0.0523996	stable	1.28067
IL31RA	0.699448	0.00392155	0.0525135	stable	1.27973
NOTCH2	-0.731299	0.00392248	0.0525135	stable	1.27973
ZNF423	-3.08621	0.00392897	0.0525699	stable	1.27926
MYL9	-2.44893	0.00393272	0.0525896	stable	1.2791
FKBP10	-0.645759	0.00394276	0.0526934	stable	1.27824
DNAJC5	0.335315	0.00394722	0.0527021	stable	1.27817
SENP5	0.416859	0.00394798	0.0527021	stable	1.27817
SLC6A16	-0.966462	0.00395656	0.0527629	stable	1.27767
SSB	-0.460069	0.00395859	0.0527629	stable	1.27767
ZNF436	-1.66629	0.00395942	0.0527629	stable	1.27767
ZSCAN21	0.395122	0.00396204	0.0527629	stable	1.27767
HLA-J	0.955708	0.00396396	0.0527629	stable	1.27767
TCF7L2	-0.923027	0.00396753	0.0527737	stable	1.27758
CAND2	0.699731	0.00396934	0.0527737	stable	1.27758
TMEM54	1.60856	0.003976	0.0528318	stable	1.2771
BMP8B	1.89553	0.00398806	0.0529616	stable	1.27604
SLITRK5	-2.12004	0.00399934	0.0530809	stable	1.27506
THUMPD2	0.585849	0.00400485	0.0531235	stable	1.27471
RPL11	-0.731227	0.00401216	0.0531899	stable	1.27417
SNORA25	-0.242502	0.00401529	0.0532009	stable	1.27408
METTL2A	0.36117	0.00402664	0.0533206	stable	1.2731
F12	1.15686	0.00402916	0.0533234	stable	1.27308
C11orf70	-0.835812	0.00405379	0.0536187	stable	1.27068
FAM111A	1.0483	0.00406119	0.0536725	stable	1.27025
ATP6V0A2	0.505196	0.00406251	0.0536725	stable	1.27025
CLDND1	0.55971	0.00406849	0.0537208	stable	1.26986
PSMD12	0.528221	0.00408288	0.05388	stable	1.26857
C15orf56	-0.216185	0.00408678	0.0538863	stable	1.26852
FBXL16	1.61332	0.00408803	0.0538863	stable	1.26852
PLD3	-1.01522	0.00409996	0.0540128	stable	1.2675
ANKRD20A8P	1.49488	0.00411025	0.0541175	stable	1.26666
TMEM98	-2.49906	0.00411282	0.0541205	stable	1.26664
FZD2	-0.970171	0.00412265	0.0541989	stable	1.26601
DAPK1	-1.93445	0.00412347	0.0541989	stable	1.26601
BCR	-0.613639	0.00412804	0.0542281	stable	1.26578
RAB11FIP4	1.3886	0.00413265	0.0542578	stable	1.26554
CPEB4	0.826506	0.00413879	0.0543075	stable	1.26514
CHCHD2	0.623076	0.00415574	0.0544547	stable	1.26396
PTN	1.7359	0.00415633	0.0544547	stable	1.26396
GPR87	-0.228495	0.00415708	0.0544547	stable	1.26396
CCNG1	-1.03181	0.00417565	0.0546535	stable	1.26238
F8	0.864718	0.00417699	0.0546535	stable	1.26238
CTDSP2	-0.431813	0.0041919	0.0548176	stable	1.26108
RAP1A	0.41762	0.00420007	0.0548932	stable	1.26048
HADHA	-0.368175	0.00420583	0.0549365	stable	1.26014
LRRC27	-0.714411	0.00420846	0.0549365	stable	1.26014
CUL1	0.448399	0.00421052	0.0549365	stable	1.26014
SYNPR	-0.836402	0.00421638	0.054982	stable	1.25978
KIF26A	-1.62417	0.00422018	0.0550004	stable	1.25963
GLYATL2	-1.01259	0.00422352	0.055013	stable	1.25953
MXD4	-0.891469	0.00423632	0.0551486	stable	1.25847
CFHR1	-0.0480363	0.00424004	0.0551659	stable	1.25833
PCA3	0.252275	0.00425169	0.0552863	stable	1.25738
GPER1	-1.43363	0.00426912	0.0554817	stable	1.25585
GLIPR2	0.804109	0.00427754	0.0555598	stable	1.25524
VKORC1	-0.487253	0.00428099	0.0555734	stable	1.25513
GABRA2	-1.08753	0.00428486	0.0555924	stable	1.25498
ACTG1	-0.859274	0.0042948	0.0556705	stable	1.25438
TMEM104	0.428228	0.0042957	0.0556705	stable	1.25438
SEC16A	0.39116	0.00430048	0.0557012	stable	1.25414
WDR11	-0.361377	0.00431521	0.0558442	stable	1.25302
TTC26	0.57349	0.00431635	0.0558442	stable	1.25302
CUL4B	0.765047	0.00433267	0.0559949	stable	1.25185
ZNF83	1.06829	0.00433354	0.0559949	stable	1.25185
TPM1	-1.59287	0.00433528	0.0559949	stable	1.25185
AMZ1	0.801535	0.00433789	0.0559974	stable	1.25183
ZNF367	0.917823	0.00435384	0.0561719	stable	1.25048
FRMPD3	1.98744	0.00436494	0.0562835	stable	1.24962
SNED1	-2.45432	0.00438076	0.0564561	stable	1.24829
SPRN	-0.863105	0.00439897	0.0566583	stable	1.24674
TMEM108	2.07892	0.00440487	0.0566583	stable	1.24674
CFLAR-AS1	0.263397	0.00440652	0.0566583	stable	1.24674
RGS20	-1.04893	0.0044082	0.0566583	stable	1.24674
PSTPIP2	-1.23805	0.00440872	0.0566583	stable	1.24674
RAET1G	0.410064	0.00441193	0.056668	stable	1.24666
PAPSS2	-1.53982	0.00442489	0.0568029	stable	1.24563
FLJ44511	1.06515	0.00443745	0.0569325	stable	1.24464
MAP3K7CL	1.49662	0.00445058	0.0570081	stable	1.24406
ZNF585B	0.714093	0.00445089	0.0570081	stable	1.24406
ZNF699	0.710309	0.00445242	0.0570081	stable	1.24406
C16orf3	0.653462	0.00445322	0.0570081	stable	1.24406
RPUSD4	-0.585612	0.00445813	0.0570394	stable	1.24383
LYNX1	1.65897	0.00446647	0.0571145	stable	1.24325
TP53I3	-1.12121	0.0044721	0.0571548	stable	1.24295
CD27	0.415745	0.00448455	0.0572527	stable	1.2422
LUM	-2.73843	0.00448472	0.0572527	stable	1.2422
HIF1AN	-0.395793	0.00449259	0.0573214	stable	1.24168
TNFRSF9	0.495416	0.0045101	0.0575032	stable	1.24031
ABR	-0.732678	0.00451181	0.0575032	stable	1.24031
ELL3	-0.473765	0.00451709	0.0575144	stable	1.24022
COL2A1	-2.39982	0.00451767	0.0575144	stable	1.24022
P2RX5	-1.0405	0.0045244	0.0575684	stable	1.23982
PPAP2C	2.07014	0.00452886	0.0575933	stable	1.23963
FBLIM1	1.0881	0.00454138	0.0577035	stable	1.2388
LOC284412	0.836936	0.00454257	0.0577035	stable	1.2388
DYRK1A	0.326837	0.00454779	0.0577035	stable	1.2388
UCKL1	0.345654	0.00455001	0.0577035	stable	1.2388
ZNF732	-0.357145	0.0045513	0.0577035	stable	1.2388
FGF1	1.7055	0.00455251	0.0577035	stable	1.2388
LOC100506023	0.478372	0.00455623	0.0577189	stable	1.23868
KCNK15	-1.00423	0.00456404	0.0577861	stable	1.23818
MYBPC2	-1.12401	0.00457986	0.0579547	stable	1.23691
CMC4	0.665799	0.00458904	0.0580296	stable	1.23635
PREX2	-1.66897	0.00459089	0.0580296	stable	1.23635
DNAJB1	0.537402	0.00459547	0.0580296	stable	1.23635
ZNF808	1.13158	0.00459688	0.0580296	stable	1.23635
DTX4	-1.84441	0.00459834	0.0580296	stable	1.23635
NEU1	0.591733	0.00460376	0.0580662	stable	1.23608
ARL15	0.96958	0.00462021	0.0582129	stable	1.23498
HOTAIR	1.27701	0.00462043	0.0582129	stable	1.23498
BAG3	-0.881213	0.004629	0.058289	stable	1.23441
ABHD17C	1.1265	0.00463266	0.0583033	stable	1.23431
ANKMY2	0.66299	0.00464258	0.0583687	stable	1.23382
MACC1	0.572868	0.0046429	0.0583687	stable	1.23382
C18orf25	0.443631	0.00464601	0.0583759	stable	1.23377
CCDC71L	1.06663	0.00466877	0.05863	stable	1.23188
DBF4	0.821069	0.00467739	0.0587063	stable	1.23131
CCDC68	-0.564751	0.00469229	0.0588223	stable	1.23046
SIGIRR	-1.60408	0.00469352	0.0588223	stable	1.23046
SLC25A45	-0.696902	0.00469427	0.0588223	stable	1.23046
DAK	-0.559421	0.00470612	0.0589307	stable	1.22966
PARP8	1.92425	0.00470803	0.0589307	stable	1.22966
MITF	1.39726	0.00471741	0.0589317	stable	1.22965
SUV39H1	0.905318	0.0047178	0.0589317	stable	1.22965
PKNOX1	0.453377	0.00471787	0.0589317	stable	1.22965
BTBD7	-0.431963	0.00471831	0.0589317	stable	1.22965
MRPL10	-0.432309	0.00476314	0.0594594	stable	1.22578
ATM	-0.431725	0.00476712	0.059477	stable	1.22565
ZNF267	0.613168	0.00477206	0.0595065	stable	1.22544
GPBP1	0.346138	0.00479025	0.059701	stable	1.22402
EPB41L2	-0.573733	0.00480155	0.0597944	stable	1.22334
SLC35F6	0.44598	0.00480292	0.0597944	stable	1.22334
STAG3L1	0.531571	0.00480682	0.0598108	stable	1.22322
LRRC63	0.339822	0.00481108	0.0598315	stable	1.22307
CNOT8	-0.384637	0.00482314	0.0599468	stable	1.22223
EXT1	-0.631753	0.00482555	0.0599468	stable	1.22223
UGCG	1.10878	0.00483585	0.0600425	stable	1.22154
WISP1	2.51605	0.0048429	0.0600978	stable	1.22114
CBLB	-0.65832	0.004849	0.0601412	stable	1.22083
NOB1	-0.622647	0.0048589	0.0602316	stable	1.22018
HOXB5	2.18163	0.00486626	0.0602905	stable	1.21975
VCPIP1	0.404616	0.00488865	0.0605354	stable	1.21799
LINC00601	0.669788	0.00490226	0.0606541	stable	1.21714
ZNF101	0.567387	0.00490349	0.0606541	stable	1.21714
SLC25A18	1.49322	0.00491264	0.0607348	stable	1.21656
SHISA5	-0.301568	0.00492561	0.0608625	stable	1.21565
FAM185A	0.505003	0.00492849	0.0608655	stable	1.21563
SKA2	0.518764	0.00493656	0.0609219	stable	1.21523
RPL13AP6	-0.176081	0.00493833	0.0609219	stable	1.21523
TENM3	-3.33046	0.00495955	0.0611435	stable	1.21365
ARNTL2	0.764154	0.00496159	0.0611435	stable	1.21365
TMEM80	-0.746469	0.00496556	0.0611599	stable	1.21353
TMEM114	-0.141556	0.00496919	0.0611719	stable	1.21345
GAPVD1	0.416306	0.00497657	0.0612301	stable	1.21303
STK35	0.517281	0.00498171	0.0612607	stable	1.21282
SLC26A6	0.609735	0.00499079	0.0613397	stable	1.21226
XKR9	0.427791	0.00499586	0.0613694	stable	1.21205
SERPINA3	2.01048	0.00500078	0.0613972	stable	1.21185
CRY1	0.699941	0.00500652	0.061435	stable	1.21158
TNFRSF14	1.32756	0.00502156	0.0615868	stable	1.21051
SNORD1C	-0.0857913	0.00503702	0.0617436	stable	1.20941
LSMEM1	0.527158	0.00504116	0.0617548	stable	1.20933
SPESP1	-0.0842736	0.00504328	0.0617548	stable	1.20933
PHLPP1	-1.1287	0.00505166	0.0618246	stable	1.20884
TMTC1	-2.28792	0.00505972	0.0618761	stable	1.20848
ZRSR2	0.614568	0.00506123	0.0618761	stable	1.20848
NUDT1	0.834158	0.00507068	0.0619589	stable	1.2079
NFKBIZ	1.30586	0.00507844	0.0620067	stable	1.20756
SRF	-0.36227	0.00508024	0.0620067	stable	1.20756
RNF128	2.29205	0.00508364	0.0620067	stable	1.20756
LEAP2	0.363122	0.00508729	0.0620067	stable	1.20756
ZNF391	0.994965	0.00509066	0.0620067	stable	1.20756
B4GALT4	0.5776	0.00509071	0.0620067	stable	1.20756
TMEM200C	1.72171	0.00514608	0.0626337	stable	1.20319
LEKR1	0.393487	0.0051476	0.0626337	stable	1.20319
LGI3	0.592068	0.00515323	0.0626691	stable	1.20295
LOC441204	1.10783	0.00517625	0.0628965	stable	1.20137
FAM106CP	0.596545	0.00517875	0.0628965	stable	1.20137
ZNF525	1.02393	0.00518009	0.0628965	stable	1.20137
MPHOSPH9	0.486922	0.00521078	0.0632035	stable	1.19926
ADPRM	-0.450593	0.00521085	0.0632035	stable	1.19926
METTL21A	0.455886	0.00522436	0.0633341	stable	1.19836
ISYNA1	-0.938427	0.00523727	0.0634573	stable	1.19752
EIF4H	0.44929	0.00524156	0.0634759	stable	1.19739
HMGB3P1	0.327573	0.00525595	0.0635705	stable	1.19674
CHAD	0.452215	0.00525603	0.0635705	stable	1.19674
TFPT	0.5617	0.00525763	0.0635705	stable	1.19674
KLK14	0.363163	0.00527758	0.0637173	stable	1.19574
ACOX3	-0.608117	0.00527845	0.0637173	stable	1.19574
SLC1A4	1.17725	0.00527935	0.0637173	stable	1.19574
FYCO1	-0.594624	0.00528081	0.0637173	stable	1.19574
CXorf38	0.513723	0.00529018	0.0637971	stable	1.1952
B4GALT6	1.77258	0.00529549	0.0638278	stable	1.19499
ANAPC2	0.478509	0.00530872	0.0639539	stable	1.19413
C1QTNF2	0.746177	0.00531285	0.0639702	stable	1.19402
NCOA6	0.403837	0.00531942	0.0640159	stable	1.19371
DYNLT3	0.981357	0.00535526	0.0644137	stable	1.19102
PCDHAC2	1.30807	0.0053634	0.0644781	stable	1.19059
LRRC23	0.607006	0.0053738	0.0645694	stable	1.18997
ACKR3	2.36219	0.00538329	0.0646499	stable	1.18943
GSTO1	-0.860471	0.00539358	0.0647398	stable	1.18883
PCDHB7	1.82026	0.0053993	0.0647747	stable	1.18859
FMN2	1.77875	0.00541703	0.0649537	stable	1.1874
ELMOD1	2.1467	0.00542527	0.0650188	stable	1.18696
RPS20	-0.517824	0.00543158	0.0650606	stable	1.18668
E2F7	1.35801	0.00543843	0.0651076	stable	1.18637
LOC375196	-0.0954133	0.00544114	0.0651076	stable	1.18637
GDNF-AS1	0.871547	0.00546299	0.0653183	stable	1.18496
LAMB3	1.64156	0.0054662	0.0653183	stable	1.18496
VPS13D	0.537068	0.00546739	0.0653183	stable	1.18496
ANLN	1.08802	0.00547521	0.0653183	stable	1.18496
LINC00670	0.356128	0.00547942	0.0653183	stable	1.18496
ARHGAP23	0.808898	0.00548108	0.0653183	stable	1.18496
AGBL2	0.678643	0.00548338	0.0653183	stable	1.18496
VBP1	0.53181	0.00548341	0.0653183	stable	1.18496
TUSC3	-3.12201	0.00548421	0.0653183	stable	1.18496
ZNF788	0.843819	0.00548879	0.0653392	stable	1.18483
ZNF33B	-0.819758	0.0054919	0.0653425	stable	1.1848
LOC100507537	-0.0294268	0.00550419	0.0654551	stable	1.18406
NEGR1	-1.77832	0.00551607	0.0655451	stable	1.18346
LOC145845	-0.217096	0.00551744	0.0655451	stable	1.18346
DBR1	0.372468	0.00552828	0.0656401	stable	1.18283
LOC101927797	0.370791	0.00554852	0.0658443	stable	1.18148
ABHD11	0.819748	0.00555123	0.0658443	stable	1.18148
CAMK2N1	1.26989	0.00555403	0.0658443	stable	1.18148
COL7A1	1.79529	0.00557191	0.0659751	stable	1.18062
MAB21L1	1.32044	0.00557248	0.0659751	stable	1.18062
ATF3	1.19127	0.00557567	0.0659751	stable	1.18062
GRAMD2	-0.537479	0.00557754	0.0659751	stable	1.18062
PCDHB12	1.37447	0.00558171	0.0659751	stable	1.18062
XYLT1	2.64721	0.00558373	0.0659751	stable	1.18062
TIMP3	-3.06511	0.00558649	0.0659751	stable	1.18062
XRCC2	1.01369	0.00558792	0.0659751	stable	1.18062
SPTLC1	0.372599	0.00559134	0.0659818	stable	1.18058
MIR3649	-0.0226809	0.00559521	0.0659866	stable	1.18054
KIAA0922	-0.681454	0.00559885	0.0659866	stable	1.18054
TUBA1B	0.623974	0.00560125	0.0659866	stable	1.18054
RNF175	1.43617	0.00560318	0.0659866	stable	1.18054
DDIT3	1.07362	0.00561984	0.0661474	stable	1.17949
PARP10	1.25044	0.00562416	0.0661474	stable	1.17949
FKBP9	0.71239	0.00562542	0.0661474	stable	1.17949
YWHAG	0.463427	0.00563339	0.0662074	stable	1.17909
WNK2	-2.06182	0.00564135	0.0662672	stable	1.1787
ZNF90	1.03975	0.00564704	0.0663004	stable	1.17848
C1orf216	0.486811	0.00566282	0.0664518	stable	1.17749
DPPA3	0.296164	0.00567449	0.066555	stable	1.17682
SRRM3	1.51302	0.00568199	0.0666091	stable	1.17647
LINC01252	0.689032	0.00569078	0.0666783	stable	1.17602
CCDC15	0.692179	0.00570022	0.0667478	stable	1.17556
MED4	-0.411853	0.0057025	0.0667478	stable	1.17556
SERPINE2	1.63126	0.00571767	0.0668612	stable	1.17483
RPL36AL	-0.61108	0.00571797	0.0668612	stable	1.17483
TSC22D1	0.542146	0.00572511	0.0669107	stable	1.1745
KANK3	-0.599675	0.0057319	0.0669562	stable	1.17421
KIRREL3	1.91018	0.00574763	0.0671008	stable	1.17327
SAP130	0.277027	0.00575009	0.0671008	stable	1.17327
ZNF823	0.513045	0.00576679	0.0672476	stable	1.17232
C10orf35	1.05222	0.00577122	0.0672476	stable	1.17232
LRRK1	1.88999	0.00577141	0.0672476	stable	1.17232
DAXX	0.417977	0.00577601	0.0672673	stable	1.1722
CPLX1	-0.727977	0.00578762	0.0673234	stable	1.17183
MPC1	0.724307	0.0057896	0.0673234	stable	1.17183
TFEB	0.663477	0.00579129	0.0673234	stable	1.17183
DCLRE1B	0.50505	0.00579248	0.0673234	stable	1.17183
GLIPR1L2	0.424549	0.00579718	0.0673441	stable	1.1717
C7orf13	-1.23911	0.00580373	0.0673848	stable	1.17144
MPV17L2	0.541833	0.00580652	0.0673848	stable	1.17144
PCDHA2	1.25583	0.00581208	0.0673929	stable	1.17139
RPP25	-1.25428	0.00581305	0.0673929	stable	1.17139
CLEC4F	0.822443	0.00581903	0.067409	stable	1.17128
TMEM38B	0.840699	0.00582202	0.067409	stable	1.17128
HIVEP3	0.850525	0.0058232	0.067409	stable	1.17128
KHDRBS3	1.59429	0.00583234	0.067481	stable	1.17082
PPP1R35	0.499207	0.00585279	0.0676806	stable	1.16954
HS3ST4	-0.0181409	0.00585546	0.0676806	stable	1.16954
NUP85	0.535733	0.00586534	0.067761	stable	1.16902
CTB-118N6.3	-0.75561	0.00587312	0.0678115	stable	1.1687
CDS2	0.491322	0.00587559	0.0678115	stable	1.1687
HSPB6	1.98182	0.00589	0.0679438	stable	1.16785
GRSF1	-0.408242	0.00590309	0.0680609	stable	1.1671
RHBDD2	0.709342	0.00591288	0.0681397	stable	1.1666
TSPAN13	1.57489	0.00595265	0.0685638	stable	1.16391
SLC28A3	-0.134627	0.00596158	0.0686324	stable	1.16347
AMPD3	1.946	0.00597762	0.0687829	stable	1.16252
BRPF3	0.418975	0.00599487	0.068947	stable	1.16148
C10orf11	0.582245	0.0060112	0.0691004	stable	1.16052
NADSYN1	-0.475668	0.00601516	0.0691115	stable	1.16045
LINC01258	-0.0349696	0.0060212	0.069132	stable	1.16032
TMEM185A	0.441195	0.00602293	0.069132	stable	1.16032
ZMIZ2	0.571261	0.0060434	0.0693324	stable	1.15906
PAQR7	0.46883	0.00604671	0.069336	stable	1.15904
TAF13	0.509485	0.0060598	0.0694516	stable	1.15832
HIBADH	0.616041	0.0060832	0.0696852	stable	1.15686
TAB3	0.674683	0.00609035	0.0697325	stable	1.15656
SNTA1	1.06435	0.00609888	0.0697956	stable	1.15617
DCAF4L1	0.366157	0.00610219	0.0697989	stable	1.15615
TSPAN4	-0.605653	0.00611132	0.0698688	stable	1.15572
BLM	0.85677	0.0061525	0.0703047	stable	1.15302
BOK	-1.51856	0.00615998	0.0703554	stable	1.1527
C10orf95	-0.320744	0.00617175	0.070435	stable	1.15221
LOC100505942	0.429606	0.00617305	0.070435	stable	1.15221
INPP1	0.76975	0.00619383	0.070637	stable	1.15097
TSLP	-1.03181	0.00619687	0.070637	stable	1.15097
ARHGAP5-AS1	0.659843	0.00622413	0.0709127	stable	1.14928
CDC42EP5	-1.40652	0.00623112	0.070935	stable	1.14914
CES5AP1	-0.0966652	0.00623223	0.070935	stable	1.14914
EFCAB14	0.364914	0.00624264	0.0710048	stable	1.14871
RDH16	0.498695	0.00624451	0.0710048	stable	1.14871
C9orf170	0.327228	0.00625855	0.0711294	stable	1.14795
P2RY12	0.185157	0.00626652	0.071185	stable	1.14761
LINC00244	-0.0385962	0.00630135	0.0715454	stable	1.14542
ABCA8	2.22206	0.00630788	0.0715843	stable	1.14518
CSTF2	0.585373	0.00631142	0.0715893	stable	1.14515
EIF2D	-0.436648	0.00632413	0.0716983	stable	1.14449
OASL	1.20182	0.00635331	0.0719938	stable	1.14271
HOXA11	1.11468	0.00636272	0.072017	stable	1.14257
CDON	-1.03963	0.00636275	0.072017	stable	1.14257
GNE	0.45278	0.00636471	0.072017	stable	1.14257
APOD	1.58607	0.00636927	0.0720332	stable	1.14247
AFF1	0.503271	0.00637587	0.072044	stable	1.1424
LAMP3	1.04164	0.00637645	0.072044	stable	1.1424
LOC101928372	0.469284	0.00638116	0.0720559	stable	1.14233
FOXL2NB	0.698144	0.00638375	0.0720559	stable	1.14233
LDLRAD4	1.48146	0.0064042	0.0722379	stable	1.14123
CDH16	-0.0124456	0.00640613	0.0722379	stable	1.14123
LOC102724224	0.404094	0.0064237	0.0724006	stable	1.14026
CYP3A5	0.579148	0.00643722	0.0725176	stable	1.13956
NCAM1	1.59415	0.00644661	0.072588	stable	1.13914
ENTPD3-AS1	0.495252	0.00645255	0.0726195	stable	1.13895
GPRC5B	1.80597	0.00648083	0.0729022	stable	1.13726
IER3	-2.39151	0.00649297	0.0730032	stable	1.13666
KCNC1	1.6823	0.00649863	0.0730313	stable	1.13649
WDR37	-0.466616	0.00650332	0.0730484	stable	1.13639
ARHGEF11	0.561115	0.00651999	0.0732001	stable	1.13549
RUNX1-IT1	0.26298	0.00653043	0.0732817	stable	1.135
DPP6	2.49346	0.0065392	0.0733445	stable	1.13463
ZNF222	0.461518	0.0065432	0.0733537	stable	1.13458
PBRM1	-0.717831	0.00655622	0.0734302	stable	1.13413
DLGAP2	-0.0547264	0.00656014	0.0734302	stable	1.13413
TSTD2	0.423957	0.00656169	0.0734302	stable	1.13413
CYP4F35P	0.784953	0.00656274	0.0734302	stable	1.13413
C6orf52	0.666079	0.00657413	0.0734558	stable	1.13397
PTPN4	-0.509655	0.00657416	0.0734558	stable	1.13397
STAC2	1.43916	0.00657457	0.0734558	stable	1.13397
ZNF385D	-1.79883	0.00658059	0.0734663	stable	1.13391
TOMM20	-0.427498	0.00658187	0.0734663	stable	1.13391
ITPR2	1.28368	0.0065984	0.0736061	stable	1.13309
KIF4A	0.920437	0.00660077	0.0736061	stable	1.13309
RPS6KC1	0.426372	0.00662309	0.0737453	stable	1.13227
GRB7	-0.302357	0.00662473	0.0737453	stable	1.13227
ELL	0.414875	0.00662709	0.0737453	stable	1.13227
C3orf52	1.38669	0.00662846	0.0737453	stable	1.13227
SLCO1C1	-1.23542	0.00662922	0.0737453	stable	1.13227
MGC45800	-2.28854	0.00665078	0.07394	stable	1.13112
STYX	-0.447436	0.00665313	0.07394	stable	1.13112
OTOG	-0.0575841	0.00666385	0.0740236	stable	1.13063
ASAP1	0.385134	0.00667134	0.0740711	stable	1.13035
RALGAPA2	0.685288	0.00667933	0.0740772	stable	1.13032
GGA3	0.403133	0.00667979	0.0740772	stable	1.13032
ERRFI1	-0.878644	0.00668151	0.0740772	stable	1.13032
CCDC136	1.04378	0.00668835	0.0741175	stable	1.13008
ANGPTL4	-1.24902	0.00669168	0.0741188	stable	1.13007
LTBP2	-2.22082	0.00671144	0.0743021	stable	1.129
SLC40A1	1.66221	0.00671723	0.074323	stable	1.12888
PTCSC3	0.40645	0.00671977	0.074323	stable	1.12888
DESI1	-0.433599	0.0067284	0.0743828	stable	1.12853
MRGPRX3	0.544034	0.00675232	0.0746115	stable	1.12719
RPS7	-0.529452	0.00675745	0.0746325	stable	1.12707
ARRDC3	0.656241	0.00676089	0.0746348	stable	1.12706
CIB2	0.878993	0.00677685	0.0747752	stable	1.12624
TMEM161B-AS1	0.723404	0.00678825	0.0748653	stable	1.12572
DDX11-AS1	0.535898	0.00679605	0.0749155	stable	1.12543
LOC339666	0.598144	0.00680795	0.0750109	stable	1.12488
FAM110B	1.30379	0.00683156	0.0751874	stable	1.12385
DUXAP10	0.547624	0.00683314	0.0751874	stable	1.12385
RPA3	0.78945	0.00683436	0.0751874	stable	1.12385
HOXA7	1.4849	0.006837	0.0751874	stable	1.12385
DPY19L4	0.305399	0.00684055	0.0751907	stable	1.12384
MIR4500HG	-0.0639358	0.00684586	0.0752133	stable	1.12371
PCDH1	2.49307	0.00685367	0.0752472	stable	1.12351
C2orf27A	0.785493	0.00685547	0.0752472	stable	1.12351
LOC100287846	0.506471	0.00687119	0.075384	stable	1.12272
PMP2	3.84972	0.00687945	0.0754071	stable	1.12259
CNKSR2	1.38102	0.0068825	0.0754071	stable	1.12259
PTPRK	0.739782	0.00688309	0.0754071	stable	1.12259
COX6A1	0.309308	0.00688985	0.0754453	stable	1.12237
CDK20	0.568836	0.00689619	0.0754789	stable	1.12217
MAD1L1	0.446261	0.00690205	0.0754926	stable	1.1221
LOXL1-AS1	-1.22382	0.00690398	0.0754926	stable	1.1221
ZNF275	0.497482	0.00691441	0.0755709	stable	1.12165
TIRAP	0.51236	0.00692372	0.0756368	stable	1.12127
ZNF844	0.965441	0.00692894	0.0756431	stable	1.12123
REEP1	1.25127	0.00693084	0.0756431	stable	1.12123
HSD17B8	-1.03848	0.00693805	0.0756657	stable	1.1211
NNMT	2.58754	0.00693947	0.0756657	stable	1.1211
LAMA3	1.98089	0.00694559	0.0756968	stable	1.12092
DUXA	0.510079	0.0069869	0.0760766	stable	1.11875
GID8	0.283696	0.00698703	0.0760766	stable	1.11875
PTPRN	2.24411	0.00699874	0.0761392	stable	1.11839
SPRYD3	0.543826	0.00699938	0.0761392	stable	1.11839
TNFRSF19	1.45795	0.00701003	0.0761783	stable	1.11817
ITPRIP	-0.816194	0.00701629	0.0761783	stable	1.11817
ERO1LB	0.601151	0.00701714	0.0761783	stable	1.11817
ZNF204P	1.37992	0.00702096	0.0761783	stable	1.11817
PCTP	0.741508	0.00702097	0.0761783	stable	1.11817
SLIT2	-2.35371	0.0070252	0.0761783	stable	1.11817
COX15	-0.601602	0.00702606	0.0761783	stable	1.11817
SNORD52	-0.0879384	0.00703009	0.0761863	stable	1.11812
LINC01006	-0.262997	0.00703699	0.0762252	stable	1.1179
SLC15A2	-1.5497	0.00705457	0.0763262	stable	1.11733
LOC113230	0.823934	0.00705562	0.0763262	stable	1.11733
PDE4DIP	0.914045	0.00705897	0.0763262	stable	1.11733
BRI3	0.599499	0.00706274	0.0763262	stable	1.11733
AGFG2	0.751802	0.00706284	0.0763262	stable	1.11733
GORASP1	0.344286	0.00708184	0.0764958	stable	1.11636
STOX1	-0.569041	0.00708787	0.0765085	stable	1.11629
CDNF	-0.356099	0.00709121	0.0765085	stable	1.11629
ZNRF2P1	0.743744	0.00709396	0.0765085	stable	1.11629
USP16	0.323536	0.00709626	0.0765085	stable	1.11629
ARMCX6	0.467255	0.00710994	0.076591	stable	1.11582
MRPL23	-0.511096	0.00711055	0.076591	stable	1.11582
DPY19L2P4	0.632211	0.00711674	0.0765924	stable	1.11581
ZNF568	0.58799	0.00711731	0.0765924	stable	1.11581
SLC4A10	1.23035	0.00713204	0.0767151	stable	1.11512
FAM107A	-1.47573	0.00713994	0.0767643	stable	1.11484
TNFSF12	0.835771	0.00715472	0.0768875	stable	1.11414
ZNF81	0.617683	0.00716664	0.0769746	stable	1.11365
ZCWPW1	0.6681	0.0071695	0.0769746	stable	1.11365
SMYD2	0.908822	0.00717426	0.07699	stable	1.11357
CUEDC2	-0.530446	0.00718034	0.0770194	stable	1.1134
ANKRD29	0.916978	0.00718578	0.077042	stable	1.11327
F2R	-1.00229	0.00719719	0.0771285	stable	1.11278
FLJ32255	1.24496	0.00721974	0.0773089	stable	1.11177
ADAM19	1.50488	0.00722393	0.0773089	stable	1.11177
ASTE1	0.498067	0.00722463	0.0773089	stable	1.11177
LINC01268	1.14703	0.00722741	0.0773089	stable	1.11177
S100A13	-0.824977	0.00724837	0.0774971	stable	1.11071
TNNT3	-0.0728003	0.00725469	0.0775289	stable	1.11054
PPP6R1	0.406094	0.00727426	0.077702	stable	1.10957
H1FX-AS1	-0.719011	0.00729076	0.0778423	stable	1.10878
MGC16142	0.396235	0.00729776	0.077881	stable	1.10857
SPTBN4	1.32273	0.00731878	0.0780692	stable	1.10752
USF1	0.388486	0.00733162	0.0781701	stable	1.10696
NTMT1	0.641415	0.00734	0.0781847	stable	1.10688
LOC100130476	0.439186	0.00734162	0.0781847	stable	1.10688
OPLAH	-1.44213	0.00734315	0.0781847	stable	1.10688
ERCC3	0.278048	0.00735397	0.0782639	stable	1.10644
HMCN1	-1.48099	0.00736899	0.0783875	stable	1.10575
ARL5B	-0.594559	0.00738597	0.0784962	stable	1.10515
CHCHD1	-0.552831	0.007386	0.0784962	stable	1.10515
TRAPPC2L	-0.493272	0.00739475	0.0785234	stable	1.105
HOXB9	2.97996	0.00740009	0.0785234	stable	1.105
NAT16	1.4446	0.00740038	0.0785234	stable	1.105
S100A2	-1.05018	0.00740216	0.0785234	stable	1.105
PPIA	0.550512	0.00740891	0.0785247	stable	1.10499
SGOL1	0.772542	0.00740908	0.0785247	stable	1.10499
DXO	0.390838	0.00741573	0.0785335	stable	1.10495
LOC101928336	0.551648	0.00741671	0.0785335	stable	1.10495
OCLM	0.281027	0.00742186	0.078552	stable	1.10484
NFKBIA	0.863183	0.00742589	0.0785586	stable	1.10481
SERPINH1	-1.3246	0.00743097	0.0785764	stable	1.10471
SLC12A9	0.596575	0.0074475	0.0787151	stable	1.10394
BRE	-0.524327	0.00747277	0.0789461	stable	1.10267
HNRNPA1P33	-0.138659	0.0074867	0.0790571	stable	1.10206
ZNF563	0.506226	0.00749315	0.0790891	stable	1.10188
ADH4	-0.336307	0.00749689	0.0790924	stable	1.10187
SHFM1	0.462197	0.00750744	0.0791675	stable	1.10145
TMEM256	-0.519617	0.00751992	0.0792443	stable	1.10103
AFAP1L2	1.61595	0.00752158	0.0792443	stable	1.10103
C5orf66	0.365827	0.00753837	0.079385	stable	1.10026
RBBP7	0.611757	0.00754707	0.0794184	stable	1.10008
ITSN2	0.390298	0.00754843	0.0794184	stable	1.10008
MKKS	0.458116	0.00755286	0.0794289	stable	1.10002
WHAMMP3	0.544628	0.00756268	0.0794853	stable	1.09971
AJAP1	-0.937707	0.00756642	0.0794853	stable	1.09971
SELPLG	-0.631345	0.00756855	0.0794853	stable	1.09971
LOC101928100	1.66034	0.00757831	0.0795516	stable	1.09935
PDZD11	0.400961	0.00758319	0.0795635	stable	1.09929
RPS16	-0.623528	0.00758634	0.0795635	stable	1.09929
FAM35A	-0.59778	0.00759385	0.0796062	stable	1.09905
LIN54	0.441368	0.00761071	0.0797219	stable	1.09842
DENND6A	0.414365	0.00761438	0.0797219	stable	1.09842
C11orf86	-0.104062	0.00761525	0.0797219	stable	1.09842
HERC6	1.26719	0.00761954	0.0797306	stable	1.09837
CD14	0.492054	0.00762665	0.0797679	stable	1.09817
C7orf31	0.690599	0.00763	0.0797679	stable	1.09817
ITIH4	0.855981	0.00763477	0.0797816	stable	1.0981
SLC38A2	0.539732	0.00765006	0.079873	stable	1.0976
SLC23A2	0.580185	0.00765559	0.079873	stable	1.0976
FMO5	0.870872	0.00765643	0.079873	stable	1.0976
MYBL1	0.95114	0.00765735	0.079873	stable	1.0976
TLR1	1.09215	0.00768184	0.0800923	stable	1.09641
FAM179A	-0.776608	0.00768718	0.0801118	stable	1.0963
C6orf25	0.421995	0.00769672	0.080175	stable	1.09596
POPDC3	2.156	0.00770313	0.0802056	stable	1.0958
DCUN1D5	-0.441803	0.00771795	0.080299	stable	1.09529
SEC23B	0.387877	0.00771905	0.080299	stable	1.09529
C1orf74	0.481222	0.0077232	0.080306	stable	1.09525
MAN1C1	1.49111	0.0077371	0.0804143	stable	1.09467
CADPS	-1.69933	0.00775822	0.0805975	stable	1.09368
CBX4	0.725137	0.00779355	0.0809282	stable	1.0919
MMEL1	-0.762691	0.00781035	0.0810304	stable	1.09135
FCRLA	1.29299	0.00781166	0.0810304	stable	1.09135
KATNAL1	0.647878	0.00781392	0.0810304	stable	1.09135
RIC3	1.2364	0.00784177	0.0812746	stable	1.09005
ZNF833P	0.498709	0.00784451	0.0812746	stable	1.09005
OLIG1	3.21968	0.00785617	0.0813531	stable	1.08963
MDH2	0.506778	0.00786137	0.0813531	stable	1.08963
ANK1	-1.88025	0.00786265	0.0813531	stable	1.08963
INTU	-1.00892	0.00788017	0.081493	stable	1.08888
ZC3H3	0.293041	0.00788323	0.081493	stable	1.08888
ZNF442	0.466361	0.00789273	0.0815547	stable	1.08855
C12orf61	0.333951	0.00789723	0.0815647	stable	1.0885
SELK	0.44034	0.00791416	0.081703	stable	1.08776
TRAIP	0.77031	0.00792456	0.0817738	stable	1.08739
FAM134B	1.13306	0.0079299	0.0817923	stable	1.08729
ABCC1	-1.01328	0.00794668	0.0819138	stable	1.08664
ZNF773	0.427182	0.00794876	0.0819138	stable	1.08664
MIR6741	-0.03162	0.00797681	0.0821662	stable	1.08531
TRAF3IP3	0.261678	0.00798123	0.082175	stable	1.08526
TRIM68	0.616842	0.00800838	0.0823932	stable	1.08411
RPL32	-0.526819	0.00800956	0.0823932	stable	1.08411
HIBCH	-0.457376	0.00801695	0.0824325	stable	1.0839
DNAJB13	0.214137	0.00802927	0.0825224	stable	1.08343
CCDC64	0.891436	0.00804	0.082596	stable	1.08304
DSP	-0.642265	0.00806276	0.0827929	stable	1.08201
AP5B1	0.528946	0.00807334	0.0828546	stable	1.08168
LOC728613	0.608095	0.00807871	0.0828546	stable	1.08168
BACH2	1.09305	0.00807952	0.0828546	stable	1.08168
KCNQ1OT1	0.424869	0.00808881	0.0828834	stable	1.08153
PLA2G4C	1.35647	0.00808951	0.0828834	stable	1.08153
DPM2	0.501137	0.00809437	0.0828922	stable	1.08149
RNF224	0.512385	0.00809755	0.0828922	stable	1.08149
EEF1A1	-0.896242	0.00810377	0.0829191	stable	1.08135
NPL	0.731595	0.00811553	0.0830026	stable	1.08091
PMEPA1	1.74958	0.00816527	0.0834745	stable	1.07845
SCNM1	0.35758	0.00817268	0.0835132	stable	1.07824
KCTD2	0.463784	0.00818077	0.0835187	stable	1.07822
NTRK2	3.31981	0.00818291	0.0835187	stable	1.07822
ST13	-0.350202	0.00818407	0.0835187	stable	1.07822
SIKE1	0.366357	0.00819476	0.0835909	stable	1.07784
CACNA1A	2.38112	0.00819922	0.0835939	stable	1.07783
DGKE	-1.26666	0.00820229	0.0835939	stable	1.07783
CH25H	1.75761	0.0082137	0.0836733	stable	1.07741
HOXC-AS1	0.491302	0.00822117	0.0836878	stable	1.07734
CAMK2N2	1.10868	0.00822394	0.0836878	stable	1.07734
FUNDC1	0.485018	0.00822601	0.0836878	stable	1.07734
SFTA1P	-1.39634	0.00823487	0.0837411	stable	1.07706
P2RX2	-0.223149	0.00824042	0.0837607	stable	1.07696
TNN	0.573058	0.00824661	0.0837868	stable	1.07682
SORT1	0.684769	0.00825743	0.0838598	stable	1.07645
EMC3-AS1	0.810419	0.00826118	0.083861	stable	1.07644
HECTD4	0.565889	0.00826946	0.0838744	stable	1.07637
MTCL1	-0.898021	0.00826977	0.0838744	stable	1.07637
PSMB3	0.47565	0.00829089	0.0840517	stable	1.07545
DNMT1	0.716924	0.00834434	0.0845565	stable	1.07285
MATN1	0.265453	0.00835797	0.0846134	stable	1.07256
BEX2	1.23142	0.00835994	0.0846134	stable	1.07256
GPATCH1	0.376863	0.00836095	0.0846134	stable	1.07256
NBPF9	-0.501471	0.0083784	0.0847528	stable	1.07185
TMEM123	-0.582111	0.00838703	0.0847922	stable	1.07164
COG1	0.359692	0.00838964	0.0847922	stable	1.07164
TAF10	-0.443622	0.00839902	0.08485	stable	1.07135
IDH3B	0.425167	0.00840732	0.0848966	stable	1.07111
GBP5	1.63103	0.00844579	0.0852333	stable	1.06939
SNHG4	-0.925366	0.00845063	0.0852333	stable	1.06939
PHLDB2	1.52638	0.00845643	0.0852333	stable	1.06939
ADRB2	-0.775744	0.00845892	0.0852333	stable	1.06939
NOMO1	0.580346	0.00845911	0.0852333	stable	1.06939
ZNF805	0.563801	0.00847989	0.0854054	stable	1.06851
PXMP4	0.90852	0.00849126	0.0854826	stable	1.06812
FIBP	-0.429788	0.00850869	0.0856208	stable	1.06742
SNORD116-21	-0.120202	0.00852859	0.0857667	stable	1.06668
SPRY1	-1.14906	0.00853062	0.0857667	stable	1.06668
RAB9B	0.89874	0.00853754	0.0857889	stable	1.06657
FAM27E3	0.792904	0.00854356	0.0857889	stable	1.06657
MOSPD1	0.492067	0.00854398	0.0857889	stable	1.06657
PFN1P2	0.36908	0.00857394	0.086032	stable	1.06534
RABGGTA	-0.391989	0.00857563	0.086032	stable	1.06534
GP6	0.371188	0.00859019	0.0861049	stable	1.06497
OR7E91P	0.276172	0.0085925	0.0861049	stable	1.06497
LNPEP	0.549998	0.00859498	0.0861049	stable	1.06497
PSAT1	-1.14359	0.00859781	0.0861049	stable	1.06497
RAPGEF4	1.15125	0.00860882	0.0861778	stable	1.0646
GDNF	1.03949	0.00862661	0.0863055	stable	1.06396
NUTM2A-AS1	-0.395037	0.00863045	0.0863055	stable	1.06396
LRCOL1	-0.385496	0.00863641	0.0863055	stable	1.06396
FGGY	-0.515274	0.00863653	0.0863055	stable	1.06396
TOR3A	0.45969	0.00864343	0.0863371	stable	1.0638
ZBTB38	0.987918	0.00866465	0.0865116	stable	1.06293
FAM200A	0.4232	0.00871116	0.0869385	stable	1.06079
HOXB-AS1	0.676019	0.00872246	0.0870136	stable	1.06041
RAD18	0.613879	0.00873135	0.0870647	stable	1.06016
FN3KRP	0.52117	0.00874595	0.0871726	stable	1.05962
MIR27B	-0.0658723	0.00876894	0.0873272	stable	1.05885
ZNF655	0.5233	0.00877193	0.0873272	stable	1.05885
DLX1	-1.79823	0.0087728	0.0873272	stable	1.05885
MUC20	1.07606	0.00879006	0.0874613	stable	1.05818
ZNF783	0.543668	0.0087977	0.0874996	stable	1.05799
ZNF570	0.464431	0.00880615	0.0875284	stable	1.05785
FAM109B	0.949624	0.00880817	0.0875284	stable	1.05785
APRT	-0.733673	0.00883129	0.0877204	stable	1.0569
SORCS3	1.91224	0.00883916	0.0877374	stable	1.05682
HCG11	-0.807973	0.00884414	0.0877374	stable	1.05682
TBC1D4	-1.43531	0.0088444	0.0877374	stable	1.05682
RMST	-0.186423	0.00886993	0.0879251	stable	1.05589
PTPN23	0.298272	0.00887316	0.0879251	stable	1.05589
ADPRH	1.10063	0.00887474	0.0879251	stable	1.05589
SLC25A34	0.636581	0.00889053	0.0880146	stable	1.05545
MGAT5	-0.677097	0.00889141	0.0880146	stable	1.05545
AQP11	0.666723	0.00890163	0.0880499	stable	1.05527
PFN4	0.308934	0.00890259	0.0880499	stable	1.05527
COLGALT1	0.634672	0.00895296	0.0884621	stable	1.05324
IPO13	0.410267	0.00895496	0.0884621	stable	1.05324
GTF2H4	0.36374	0.00895576	0.0884621	stable	1.05324
PAXIP1-AS1	0.674815	0.00899026	0.088715	stable	1.052
HS2ST1	0.426095	0.00899147	0.088715	stable	1.052
LINC00908	0.379994	0.00899289	0.088715	stable	1.052
MSS51	-0.415517	0.0090086	0.0888321	stable	1.05143
C11orf54	-0.595379	0.00902403	0.0889462	stable	1.05087
FAM167B	0.524203	0.00905945	0.0891902	stable	1.04968
LOC257396	0.569171	0.00906021	0.0891902	stable	1.04968
DBNDD1	0.912997	0.00906037	0.0891902	stable	1.04968
ITCH	0.374645	0.00907972	0.0892819	stable	1.04924
TOB1	0.600246	0.00908119	0.0892819	stable	1.04924
TSPAN14	-0.804561	0.00908128	0.0892819	stable	1.04924
ACTR6	0.340828	0.00911178	0.0895362	stable	1.048
ZNF394	0.292454	0.0091149	0.0895362	stable	1.048
SKA1	0.815519	0.0091287	0.0896336	stable	1.04753
KCNJ14	0.701746	0.0091451	0.0897565	stable	1.04693
HAND2	1.2449	0.00916301	0.0898709	stable	1.04638
NAPB	0.33954	0.00916454	0.0898709	stable	1.04638
USP32P1	1.3793	0.00919328	0.0900934	stable	1.04531
CCNY	-0.378944	0.00919848	0.0900934	stable	1.04531
ARSG	-1.11528	0.00919893	0.0900934	stable	1.04531
FAM78B	1.37432	0.00921525	0.0902149	stable	1.04472
PSMD5-AS1	1.18237	0.00922802	0.0903017	stable	1.0443
C9orf78	0.370394	0.00925449	0.0904917	stable	1.04339
GPR113	0.300521	0.00925528	0.0904917	stable	1.04339
FANCE	0.488329	0.00926448	0.0905433	stable	1.04314
RACGAP1	0.714884	0.00927624	0.0906199	stable	1.04278
FMO4	0.404414	0.00928076	0.0906257	stable	1.04275
SHROOM4	0.949076	0.00928559	0.0906345	stable	1.04271
RFC5	0.676179	0.00929812	0.0907175	stable	1.04231
HMGXB3	0.563134	0.00930195	0.0907175	stable	1.04231
GALNT6	-1.70379	0.0093291	0.090944	stable	1.04123
APOL6	1.17072	0.00937201	0.0913237	stable	1.03942
ATP5J2	0.476233	0.00937945	0.0913576	stable	1.03926
PCDHB13	1.05203	0.00938446	0.091368	stable	1.03921
STX11	0.501678	0.00941552	0.0916317	stable	1.03795
RBM24	1.08504	0.00943076	0.0917413	stable	1.03743
HCCS	0.598598	0.00945026	0.0918849	stable	1.03676
GOLGA2P5	0.809954	0.00945347	0.0918849	stable	1.03676
RAB17	0.44435	0.00948626	0.0921648	stable	1.03544
LEPREL2	-0.766284	0.00949041	0.0921663	stable	1.03543
IRGM	0.35076	0.00954358	0.0925964	stable	1.03341
SNORD60	-0.0982768	0.00954661	0.0925964	stable	1.03341
CCDC183-AS1	0.515302	0.00954895	0.0925964	stable	1.03341
ZBTB20	0.676343	0.00955074	0.0925964	stable	1.03341
MAPKAPK5	0.334516	0.00957764	0.0928183	stable	1.03237
MPP4	1.45724	0.00958769	0.0928499	stable	1.03222
HNRNPDL	-0.354043	0.00958894	0.0928499	stable	1.03222
EIF1AD	0.260272	0.00959308	0.092851	stable	1.03221
OSCAR	-0.725541	0.00960151	0.0928938	stable	1.03201
TTF1	0.412914	0.00961213	0.0929546	stable	1.03173
CASKIN2	0.500316	0.00961585	0.0929546	stable	1.03173
DPH7	0.394603	0.00963554	0.093081	stable	1.03114
NKAPP1	0.536601	0.0096403	0.093081	stable	1.03114
LOC284837	0.435078	0.00964516	0.093081	stable	1.03114
FAM133B	0.323933	0.0096516	0.093081	stable	1.03114
LOC102546226	0.354653	0.00965315	0.093081	stable	1.03114
STX1A	1.17783	0.00965483	0.093081	stable	1.03114
HSH2D	0.294585	0.00965714	0.093081	stable	1.03114
ZNF385C	0.376484	0.00968148	0.0932746	stable	1.03024
MCM8	0.896272	0.00968769	0.0932746	stable	1.03024
MX2	1.19796	0.0096928	0.0932746	stable	1.03024
ARHGAP32	-0.462181	0.00969338	0.0932746	stable	1.03024
FAM154B	0.79047	0.00971542	0.0934477	stable	1.02943
SP140L	1.03913	0.00973032	0.093552	stable	1.02895
SPEG	-0.776362	0.00974361	0.0936408	stable	1.02853
PARD3B	-1.41207	0.00975466	0.093708	stable	1.02822
LIPT2	0.328747	0.00976115	0.0937314	stable	1.02812
UTS2B	0.479442	0.00978443	0.0939159	stable	1.02726
SMG7	0.258054	0.00980256	0.0940509	stable	1.02664
SH2D3A	-0.275479	0.00981502	0.0941312	stable	1.02627
VAMP3	-0.502112	0.00982447	0.0941828	stable	1.02603
ATOH8	-1.88591	0.00983554	0.0942498	stable	1.02572
RGMB	-1.12573	0.00985268	0.0943749	stable	1.02514
C1orf52	0.350098	0.00986558	0.0944487	stable	1.0248
ATP6AP1	0.398057	0.00986952	0.0944487	stable	1.0248
PDE11A	0.393364	0.00987266	0.0944487	stable	1.0248
TUBGCP5	0.548882	0.0098822	0.0945002	stable	1.02457
PRPF4	0.497368	0.00988622	0.0945002	stable	1.02457
LOX	-2.49998	0.00991163	0.0946825	stable	1.02373
PLCB2	-0.696177	0.0099135	0.0946825	stable	1.02373
GPR155	0.868238	0.00992388	0.0947425	stable	1.02346
TMEM37	0.37126	0.00992949	0.0947569	stable	1.02339
ZNF133	0.298492	0.00994446	0.0947918	stable	1.02323
UFSP2	-0.333658	0.00994491	0.0947918	stable	1.02323
TREX1	0.485136	0.00994546	0.0947918	stable	1.02323
FAM95A	1.21815	0.00996249	0.0949149	stable	1.02267
OPRM1	0.449132	0.00997479	0.0949929	stable	1.02231
VPS41	0.431989	0.0100193	0.0953777	stable	1.02055
LRP4	-1.43606	0.0100363	0.0954996	stable	1.02
FGL2	-0.819496	0.0100409	0.0955046	stable	1.01998
FZD5	-1.27099	0.0100514	0.0955648	stable	1.0197
ACTRT3	-0.750357	0.0100561	0.0955698	stable	1.01968
ADIPOR1	0.361053	0.010087	0.0958243	stable	1.01852
OAS2	1.87928	0.0101004	0.095906	stable	1.01815
PYCARD	-0.436944	0.010104	0.095906	stable	1.01815
EIF2A	-0.518925	0.010108	0.095906	stable	1.01815
ARFGEF2	0.367981	0.0101224	0.0960032	stable	1.01771
MYO1B	-2.59123	0.0101275	0.0960118	stable	1.01768
TLE2	-1.47649	0.0101472	0.096159	stable	1.01701
NAB1	0.538006	0.0101584	0.0962258	stable	1.01671
KIAA1614	0.802751	0.0101848	0.0963479	stable	1.01616
TOB2	-0.445341	0.0101883	0.0963479	stable	1.01616
LINC00847	0.795731	0.0101923	0.0963479	stable	1.01616
PELO	0.506187	0.0101937	0.0963479	stable	1.01616
SOWAHA	0.700291	0.0101954	0.0963479	stable	1.01616
SPTB	0.959847	0.0101963	0.0963479	stable	1.01616
QARS	-0.407175	0.0102027	0.0963684	stable	1.01607
AKR1E2	-0.196347	0.0102083	0.0963824	stable	1.016
ACY3	0.335416	0.0102201	0.0964543	stable	1.01568
PKP4	0.518239	0.0102537	0.0967168	stable	1.0145
ABCB8	0.495238	0.0102682	0.0967168	stable	1.0145
LOC101927691	-0.0283739	0.0102684	0.0967168	stable	1.0145
POC1B	0.690595	0.01027	0.0967168	stable	1.0145
ATG4A	0.886485	0.010271	0.0967168	stable	1.0145
RBM33	0.394949	0.0102742	0.0967168	stable	1.0145
PLCB3	-0.513502	0.0102773	0.0967168	stable	1.0145
CBWD6	0.451706	0.0102907	0.0968041	stable	1.01411
LLGL1	-0.611743	0.0102989	0.096842	stable	1.01394
LOC100289333	0.26118	0.010316	0.0969396	stable	1.0135
SNX8	0.434402	0.0103229	0.0969396	stable	1.0135
UBOX5-AS1	0.17985	0.0103252	0.0969396	stable	1.0135
PCDH7	-2.32882	0.0103261	0.0969396	stable	1.0135
KDELR2	0.578403	0.0103491	0.097116	stable	1.01271
ZFC3H1	-0.293901	0.0103547	0.0971291	stable	1.01265
HCFC1	0.49074	0.0103704	0.0972367	stable	1.01217
C11orf95	-0.85106	0.010376	0.0972499	stable	1.01211
LOC644961	0.368642	0.0103896	0.0973267	stable	1.01177
COMMD6	-0.462136	0.010396	0.0973267	stable	1.01177
OVCH1	-0.46833	0.0103969	0.0973267	stable	1.01177
PDE12	0.414934	0.0104037	0.0973516	stable	1.01166
INE1	0.467288	0.0104177	0.0974427	stable	1.01125
UCN2	1.05351	0.0104511	0.0977154	stable	1.01004
TBRG4	0.58113	0.0104766	0.0978749	stable	1.00933
LOC101928259	-0.0265829	0.0104766	0.0978749	stable	1.00933
CYP2J2	0.978207	0.0104884	0.0979305	stable	1.00908
DNPH1	-0.66405	0.010491	0.0979305	stable	1.00908
SMCO2	0.350412	0.010501	0.0979836	stable	1.00885
LRRC26	-0.118383	0.0105083	0.0980115	stable	1.00872
KCNJ2	1.12381	0.0105124	0.0980115	stable	1.00872
TMEM44-AS1	0.56388	0.0105213	0.098054	stable	1.00853
DACT1	1.4103	0.0105368	0.0981596	stable	1.00807
RS1	-0.213781	0.0105636	0.0983691	stable	1.00714
PDE7B	1.37924	0.0105678	0.0983691	stable	1.00714
NR2F1-AS1	0.897821	0.0105861	0.0984289	stable	1.00688
ZAK	0.696095	0.0105895	0.0984289	stable	1.00688
KIF26B	-1.57671	0.010591	0.0984289	stable	1.00688
B3GNT5	0.893589	0.0105935	0.0984289	stable	1.00688
RAB39A	1.12026	0.0105956	0.0984289	stable	1.00688
OFD1	0.469807	0.0106154	0.0985734	stable	1.00624
SLC34A3	0.592348	0.0106336	0.0987027	stable	1.00567
PRKACA	0.410478	0.0106476	0.0987647	stable	1.0054
SLC31A2	0.692485	0.0106488	0.0987647	stable	1.0054
VPS37A	0.334023	0.0106619	0.098846	stable	1.00504
CACNA2D2	0.68209	0.0106876	0.0990128	stable	1.00431
GSPT2	0.517578	0.0106887	0.0990128	stable	1.00431
TMC1	0.807219	0.0106927	0.0990128	stable	1.00431
CHI3L1	3.40112	0.0107091	0.0990569	stable	1.00412
ZNF311	0.867922	0.0107093	0.0990569	stable	1.00412
[truncated: 21,096 more rows]
