# Supplementary material
Source: Research Square preprint supplement (doi:10.21203/rs.3.rs-6009404/v1)
Supplement: Supplementary file 8 [file 691b90c42b746b6e44d1003a.xlsx]

## Sheet: Core_vs_edge_LFC0.585
Core_vs_edge_Log2FC 0.585 (GBM tissue)
GSE153746
ENSEMBL	log2FoldChange	pvalue	padj	gene name	group	log10(padj)
ENSG00000003436	2.78277	0.00194063	0.0193241	TFPI	up	1.7139
ENSG00000004766	1.45914	0.00259184	0.0241366	VPS50	up	1.61732
ENSG00000005059	2.45572	5.51825e-07	1.98369e-05	MCUB	up	4.70253
ENSG00000005469	1.49869	0.00303743	0.0272464	CROT	up	1.56469
ENSG00000005483	1.14938	0.00627713	0.0472672	KMT2E	up	1.32544
ENSG00000005884	1.15357	0.00649418	0.0485187	ITGA3	up	1.31409
ENSG00000006327	2.42172	1.47949e-07	6.27903e-06	TNFRSF12A	up	5.20211
ENSG00000006468	2.87924	2.34996e-11	2.42134e-09	ETV1	up	8.61595
ENSG00000006634	2.01853	0.000235257	0.00353307	DBF4	up	2.45185
ENSG00000007171	2.64356	3.65006e-06	0.000100758	NOS2	up	3.99672
ENSG00000008405	1.82128	0.000204861	0.00315529	CRY1	up	2.50096
ENSG00000011052	2.12466	8.29984e-07	2.81552e-05	NME1-NME2	up	4.55044
ENSG00000011258	1.50823	0.00318077	0.028282	MBTD1	up	1.54849
ENSG00000012232	1.19906	0.00158725	0.0164514	EXTL3	up	1.7838
ENSG00000014914	1.62363	0.000106506	0.00180172	MTMR11	up	2.74431
ENSG00000015413	3.97034	0.00273507	0.0251668	DPEP1	up	1.59917
ENSG00000024526	3.7366	0.000118311	0.00197029	DEPDC1	up	2.70547
ENSG00000026025	2.24738	5.23728e-10	3.95733e-08	VIM	up	7.4026
ENSG00000033867	2.12179	0.000221435	0.00335519	SLC4A7	up	2.47428
ENSG00000035499	3.3645	0.00347241	0.0302333	DEPDC1B	up	1.51951
ENSG00000038382	2.09145	1.36702e-05	0.000317346	TRIO	up	3.49847
ENSG00000038945	1.54207	0.00481544	0.0391824	MSR1	up	1.40691
ENSG00000041982	1.83996	0.000317045	0.00450171	TNC	up	2.34662
ENSG00000044574	1.30652	0.0032331	0.0286548	HSPA5	up	1.5428
ENSG00000047188	1.34724	0.00198351	0.0196394	YTHDC2	up	1.70687
ENSG00000050405	1.86936	0.000160503	0.0025622	LIMA1	up	2.59139
ENSG00000052723	1.50088	0.00105507	0.0119653	SIKE1	up	1.92208
ENSG00000055609	1.18861	0.0030269	0.0271773	KMT2C	up	1.56579
ENSG00000057019	1.4968	0.00465772	0.0380921	DCBLD2	up	1.41917
ENSG00000058091	1.29297	0.00132465	0.014339	CDK14	up	1.84348
ENSG00000058804	1.70659	0.000301556	0.0043232	NDC1	up	2.36419
ENSG00000060138	1.12298	0.00300498	0.0270434	YBX3	up	1.56794
ENSG00000060749	1.7502	0.000635691	0.00804234	QSER1	up	2.09462
ENSG00000060982	2.53671	0.000232644	0.00350761	BCAT1	up	2.45499
ENSG00000062716	2.43747	4.91995e-05	0.000948924	VMP1	up	3.02277
ENSG00000064313	1.64134	0.000877101	0.0103679	TAF2	up	1.98431
ENSG00000064703	1.38871	0.00579359	0.0445237	DDX20	up	1.35141
ENSG00000065135	1.49897	0.000338523	0.0047472	GNAI3	up	2.32356
ENSG00000065183	1.52548	0.000954461	0.0110387	WDR3	up	1.95708
ENSG00000065243	2.21258	1.47753e-05	0.000339726	PKN2	up	3.46887
ENSG00000065308	2.09968	2.56658e-06	7.50424e-05	TRAM2	up	4.12469
ENSG00000065320	2.32693	1.00595e-05	0.000244114	NTN1	up	3.61241
ENSG00000065978	1.47664	4.08711e-05	0.000806044	YBX1	up	3.09364
ENSG00000066279	2.66718	1.52912e-05	0.000348675	ASPM	up	3.45758
ENSG00000066422	1.90531	0.00469103	0.0382832	ZBTB11	up	1.41699
ENSG00000067955	1.96542	1.94461e-05	0.00043117	CBFB	up	3.36535
ENSG00000068650	2.21584	0.000402838	0.00545459	ATP11A	up	2.26324
ENSG00000068697	1.62192	0.00167355	0.0171704	LAPTM4A	up	1.76522
ENSG00000069011	5.81146	8.42537e-06	0.000208932	PITX1	up	3.68
ENSG00000071539	2.40437	0.000279316	0.00406485	TRIP13	up	2.39096
ENSG00000071564	1.21993	0.00536019	0.0421552	TCF3	up	1.37515
ENSG00000071575	1.9974	3.37781e-05	0.000687988	TRIB2	up	3.16242
ENSG00000071794	1.21571	0.0053478	0.0420749	HLTF	up	1.37598
ENSG00000072571	3.7735	0.00136915	0.0147214	HMMR	up	1.83205
ENSG00000072694	2.9922	0.00014746	0.0023876	FCGR2B	up	2.62204
ENSG00000073111	1.57812	0.000535698	0.00697892	MCM2	up	2.15621
ENSG00000073792	1.97864	0.00273243	0.0251545	IGF2BP2	up	1.59938
ENSG00000074181	1.61205	0.00152817	0.0159805	NOTCH3	up	1.79641
ENSG00000074410	2.11689	6.74345e-05	0.0012281	CA12	up	2.91077
ENSG00000074695	1.43122	0.00426712	0.0356698	LMAN1	up	1.4477
ENSG00000075142	1.5793	0.00539782	0.0424158	SRI	up	1.37247
ENSG00000075218	2.63683	5.58614e-05	0.00106043	GTSE1	up	2.97452
ENSG00000075275	2.2632	4.76095e-05	0.0009201	CELSR1	up	3.03617
ENSG00000075420	2.44616	1.00236e-06	3.2846e-05	FNDC3B	up	4.48352
ENSG00000075568	1.1858	0.00389112	0.0331158	TMEM131	up	1.47996
ENSG00000075702	1.63503	0.00265771	0.0246078	WDR62	up	1.60893
ENSG00000076003	1.42693	0.00104104	0.0118411	MCM6	up	1.92661
ENSG00000076716	1.57808	0.00186496	0.0187254	GPC4	up	1.72757
ENSG00000079931	2.05156	7.84422e-05	0.00140385	MOXD1	up	2.85268
ENSG00000080298	1.40777	0.00235863	0.0225539	RFX3	up	1.64678
ENSG00000080603	2.15047	1.84846e-05	0.0004127	SRCAP	up	3.38437
ENSG00000080986	3.49084	4.73486e-06	0.000127063	NDC80	up	3.89598
ENSG00000082153	1.13836	0.00172932	0.0175834	BZW1	up	1.7549
ENSG00000082258	1.25852	0.00170392	0.017417	CCNT2	up	1.75903
ENSG00000082898	1.33024	0.000287823	0.00418233	XPO1	up	2.37858
ENSG00000083312	1.80677	9.85174e-05	0.00168582	TNPO1	up	2.77319
ENSG00000083642	1.28163	0.00632662	0.047562	PDS5B	up	1.32274
ENSG00000085721	1.27002	0.00579413	0.0445237	RRN3	up	1.35141
ENSG00000085840	2.67823	0.00128222	0.0140055	ORC1	up	1.8537
ENSG00000086598	1.60825	0.00342701	0.0299165	TMED2	up	1.52409
ENSG00000087586	2.29004	7.61447e-05	0.00136607	AURKA	up	2.86453
ENSG00000088325	3.00768	1.52671e-10	1.27898e-08	TPX2	up	7.89314
ENSG00000088448	1.14559	0.0031802	0.028282	ANKRD10	up	1.54849
ENSG00000089280	0.997067	0.00464125	0.0379735	FUS	up	1.42052
ENSG00000089597	1.12358	0.00181347	0.0182726	GANAB	up	1.7382
ENSG00000089685	2.81017	1.79779e-08	9.70303e-07	BIRC5	up	6.01309
ENSG00000089902	1.55166	0.00216222	0.0210625	RCOR1	up	1.67649
ENSG00000090382	2.22953	0.00132247	0.0143278	LYZ	up	1.84382
ENSG00000090889	2.97073	3.19907e-06	9.03807e-05	KIF4A	up	4.04392
ENSG00000091127	1.65937	0.00280589	0.0256958	PUS7	up	1.59014
ENSG00000091129	1.56123	0.00308479	0.0275557	NRCAM	up	1.55979
ENSG00000091136	2.17217	0.00561617	0.0435813	LAMB1	up	1.3607
ENSG00000091140	1.2603	0.00511328	0.0407671	DLD	up	1.38969
ENSG00000091317	1.71812	0.000797246	0.00961887	CMTM6	up	2.01688
ENSG00000091844	3.26921	0.00401117	0.0340172	RGS17	up	1.4683
ENSG00000092969	1.87362	0.00171312	0.0174648	TGFB2	up	1.75784
ENSG00000093009	2.89673	0.000355984	0.00494171	CDC45	up	2.30612
ENSG00000094804	2.08582	0.00309415	0.0276266	CDC6	up	1.55867
ENSG00000094975	1.52217	0.00056527	0.00728536	SUCO	up	2.13755
ENSG00000095015	2.40194	0.000470041	0.0062319	MAP3K1	up	2.20538
ENSG00000096433	2.39839	1.06629e-06	3.47048e-05	ITPR3	up	4.45961
ENSG00000097033	1.39725	0.000826955	0.00991523	SH3GLB1	up	2.0037
ENSG00000100162	2.33894	0.00218469	0.021217	CENPM	up	1.67332
ENSG00000100196	3.67885	0.000759987	0.00926213	KDELR3	up	2.03329
ENSG00000100479	2.70581	0.00187485	0.0188052	POLE2	up	1.72572
ENSG00000100504	1.28507	0.00134133	0.0144951	PYGL	up	1.83878
ENSG00000100505	1.18609	0.00559337	0.0434744	TRIM9	up	1.36177
ENSG00000100526	2.13146	0.00240734	0.02291	CDKN3	up	1.63997
ENSG00000100644	1.81922	0.000180538	0.00282584	HIF1A	up	2.54885
ENSG00000100941	1.46865	0.000187639	0.00292747	PNN	up	2.53351
ENSG00000100985	5.43597	2.38081e-05	0.000511411	MMP9	up	3.29123
ENSG00000101003	2.32808	9.2301e-05	0.00160221	GINS1	up	2.79528
ENSG00000101057	2.42318	1.1632e-05	0.000275002	MYBL2	up	3.56066
ENSG00000101126	1.17632	0.00239045	0.0228015	ADNP	up	1.64204
ENSG00000101346	1.1777	0.00273757	0.0251778	POFUT1	up	1.59898
ENSG00000101384	3.20736	1.66469e-10	1.37662e-08	JAG1	up	7.86118
ENSG00000101596	1.67095	0.000153537	0.00247148	SMCHD1	up	2.60704
ENSG00000101871	1.39766	0.00157308	0.016375	MID1	up	1.78582
ENSG00000102265	1.64659	0.000168717	0.00266682	TIMP1	up	2.57401
ENSG00000102271	1.99627	4.75868e-05	0.0009201	KLHL4	up	3.03617
ENSG00000102287	3.17049	0.000585934	0.00750152	GABRE	up	2.12485
ENSG00000102359	3.67621	2.09415e-07	8.47691e-06	SRPX2	up	5.07176
ENSG00000102531	2.19691	2.78075e-06	8.0089e-05	FNDC3A	up	4.09643
ENSG00000103226	1.58061	0.00217296	0.0211458	NOMO3	up	1.67478
ENSG00000103449	1.17678	0.00456718	0.0374789	SALL1	up	1.42621
ENSG00000103489	1.59072	0.000458199	0.00609288	XYLT1	up	2.21518
ENSG00000103888	1.91802	0.000299547	0.00430453	CEMIP	up	2.36607
ENSG00000104341	2.24685	0.000486889	0.00641207	LAPTM4B	up	2.193
ENSG00000104368	1.42939	0.00089147	0.0104929	PLAT	up	1.97911
ENSG00000104626	1.83686	0.000698789	0.0087091	ERI1	up	2.06003
ENSG00000104738	1.86323	1.34902e-05	0.000313546	MCM4	up	3.5037
ENSG00000104885	1.16657	0.0052755	0.0416964	DOT1L	up	1.3799
ENSG00000104953	2.7215	0.00169179	0.0173206	TLE6	up	1.76144
ENSG00000105011	2.86057	5.8759e-07	2.10331e-05	ASF1B	up	4.6771
ENSG00000105426	1.45631	0.00670174	0.0497033	PTPRS	up	1.30361
ENSG00000105810	3.19103	4.49223e-10	3.40773e-08	CDK6	up	7.46753
ENSG00000105835	1.9853	3.36086e-07	1.27475e-05	NAMPT	up	4.89458
ENSG00000105855	1.67266	3.04723e-05	0.000635433	ITGB8	up	3.19693
ENSG00000105894	2.00439	3.7143e-07	1.3978e-05	PTN	up	4.85456
ENSG00000106028	1.27092	0.000988883	0.0113686	SSBP1	up	1.94429
ENSG00000106144	1.64948	0.000234309	0.00352519	CASP2	up	2.45282
ENSG00000106278	2.80823	3.63729e-14	6.42967e-12	PTPRZ1	up	11.1918
ENSG00000106355	1.35443	0.00149294	0.0157566	LSM5	up	1.80254
ENSG00000106399	1.98177	2.83167e-05	0.000596292	RPA3	up	3.22454
ENSG00000106415	2.19319	2.02826e-05	0.000446125	GLCCI1	up	3.35054
ENSG00000106462	2.5253	6.75808e-08	3.19938e-06	EZH2	up	5.49493
ENSG00000106484	2.71974	8.09879e-06	0.000201873	MEST	up	3.69492
ENSG00000106511	1.93838	0.00359315	0.0310941	MEOX2	up	1.50732
ENSG00000106554	1.57358	0.000151885	0.00245103	CHCHD3	up	2.61065
ENSG00000108021	1.39921	0.00485416	0.0394151	TASOR2	up	1.40434
ENSG00000108055	1.24506	0.00527589	0.0416964	SMC3	up	1.3799
ENSG00000108588	1.25572	0.00526636	0.0416895	CCDC47	up	1.37997
ENSG00000108654	1.79743	9.39266e-05	0.00162167	DDX5	up	2.79004
ENSG00000108821	1.91006	0.000669584	0.00842137	COL1A1	up	2.07462
ENSG00000108829	1.13359	0.0050771	0.0406252	LRRC59	up	1.3912
ENSG00000109220	1.9582	0.00135092	0.0145824	CHIC2	up	1.83617
ENSG00000109805	2.46418	5.38413e-06	0.00014153	NCAPG	up	3.84915
ENSG00000110077	1.42427	0.00258758	0.0241258	MS4A6A	up	1.61752
ENSG00000110492	2.00383	4.28978e-06	0.00011658	MDK	up	3.93337
ENSG00000111206	2.60999	1.6034e-07	6.70161e-06	FOXM1	up	5.17382
ENSG00000111224	2.05689	0.000870256	0.0103099	PARP11	up	1.98674
ENSG00000111247	3.12183	0.00181124	0.0182621	RAD51AP1	up	1.73845
ENSG00000111300	1.42825	0.00198982	0.0196564	NAA25	up	1.7065
ENSG00000111530	1.48793	0.000380286	0.00521149	CAND1	up	2.28304
ENSG00000111602	1.923	1.33748e-05	0.000311238	TIMELESS	up	3.50691
ENSG00000111605	1.50401	0.00174379	0.0177092	CPSF6	up	1.7518
ENSG00000111665	1.79	0.000568824	0.00732354	CDCA3	up	2.13528
ENSG00000111786	1.29832	0.00247582	0.02335	SRSF9	up	1.63171
ENSG00000111817	1.53704	0.00606377	0.0460895	DSE	up	1.3364
ENSG00000111845	1.45362	0.00502927	0.0403263	PAK1IP1	up	1.39441
ENSG00000112029	2.77862	0.000388263	0.00529444	FBXO5	up	2.27618
ENSG00000112282	1.79103	0.000110658	0.00186215	MED23	up	2.72999
ENSG00000112297	2.64548	0.00112806	0.0126295	CRYBG1	up	1.89861
ENSG00000112559	2.37524	0.000711188	0.00882936	MDFI	up	2.05407
ENSG00000112655	1.49884	0.000951787	0.0110144	PTK7	up	1.95804
ENSG00000112715	3.20824	7.7928e-07	2.67949e-05	VEGFA	up	4.57195
ENSG00000112739	1.19937	0.00347824	0.0302705	PRPF4B	up	1.51898
ENSG00000112742	3.23039	0.000897045	0.0105407	TTK	up	1.97713
ENSG00000112769	1.26394	0.00436511	0.0363	LAMA4	up	1.44009
ENSG00000112773	2.33001	2.4693e-05	0.000529237	TENT5A	up	3.27635
ENSG00000112852	2.1874	0.00430369	0.0358665	PCDHB2	up	1.44531
ENSG00000112902	1.36404	0.00226496	0.0218384	SEMA5A	up	1.66078
ENSG00000112984	3.28361	3.33773e-06	9.307e-05	KIF20A	up	4.03119
ENSG00000113083	3.08212	0.000352601	0.0049089	LOX	up	2.30902
ENSG00000113282	1.38717	0.00160746	0.0165984	CLINT1	up	1.77993
ENSG00000113368	3.03808	5.90028e-11	5.62805e-09	LMNB1	up	8.24964
ENSG00000113369	2.35084	0.00116138	0.0129275	ARRDC3	up	1.88849
ENSG00000113387	1.45841	0.000839336	0.0100438	SUB1	up	1.9981
ENSG00000113569	1.42423	0.00428254	0.0357521	NUP155	up	1.4467
ENSG00000113638	2.23914	0.00544987	0.0426515	TTC33	up	1.37007
ENSG00000113810	2.41591	7.2379e-08	3.40146e-06	SMC4	up	5.46833
ENSG00000114120	1.29187	0.00493948	0.0398384	SLC25A36	up	1.3997
ENSG00000114200	1.60123	0.00576505	0.0443437	BCHE	up	1.35317
ENSG00000114346	2.68462	0.000589253	0.007524	ECT2	up	2.12355
ENSG00000114686	1.14866	0.00481424	0.0391824	MRPL3	up	1.40691
ENSG00000115091	1.3636	0.00364715	0.0314844	ACTR3	up	1.5019
ENSG00000115107	1.9132	7.69142e-05	0.00137859	STEAP3	up	2.86057
ENSG00000115163	2.79965	0.0011621	0.012928	CENPA	up	1.88847
ENSG00000115183	2.46451	9.27742e-10	6.62064e-08	TANC1	up	7.1791
ENSG00000115380	1.65439	8.03349e-05	0.00143262	EFEMP1	up	2.84387
ENSG00000115414	2.55196	5.88378e-07	2.10331e-05	FN1	up	4.6771
ENSG00000115457	3.65666	4.16553e-21	2.11214e-18	IGFBP2	up	17.6753
ENSG00000115758	1.62245	2.31426e-05	0.000499902	ODC1	up	3.30112
ENSG00000116001	1.19973	0.00227875	0.0219425	TIA1	up	1.65871
ENSG00000116141	1.4462	0.00143219	0.0152293	MARK1	up	1.81732
ENSG00000116157	1.7329	0.00247945	0.0233729	GPX7	up	1.63129
ENSG00000116285	1.59333	0.00219069	0.0212538	ERRFI1	up	1.67256
ENSG00000116406	1.88903	0.000777382	0.00945209	EDEM3	up	2.02447
ENSG00000116489	1.14173	0.00624827	0.0471569	CAPZA1	up	1.32645
ENSG00000116641	1.30072	0.0064838	0.0484788	DOCK7	up	1.31445
ENSG00000116670	1.242	0.0027389	0.025178	MAD2L2	up	1.59898
ENSG00000116704	1.76687	0.00305251	0.0273561	SLC35D1	up	1.56295
ENSG00000116717	1.87321	9.77429e-05	0.00167405	GADD45A	up	2.77623
ENSG00000116747	1.39873	0.00640329	0.0480446	RO60	up	1.31836
ENSG00000116754	1.79921	5.32006e-07	1.9196e-05	SRSF11	up	4.71679
ENSG00000116791	1.6635	0.000720237	0.00890727	CRYZ	up	2.05026
ENSG00000116815	1.56992	0.00365963	0.0315639	CD58	up	1.50081
ENSG00000116922	1.46177	0.00655084	0.0489041	C1orf109	up	1.31065
ENSG00000116962	2.01295	5.7267e-05	0.00108391	NID1	up	2.96501
ENSG00000117114	1.73425	0.000690463	0.00862765	ADGRL2	up	2.06411
ENSG00000117133	1.82381	0.000399374	0.00541529	RPF1	up	2.26638
ENSG00000117399	2.13473	1.49962e-05	0.000343458	CDC20	up	3.46413
ENSG00000117500	2.04786	0.000546589	0.00709099	TMED5	up	2.14929
ENSG00000117519	1.59291	6.27619e-06	0.00016124	CNN3	up	3.79253
ENSG00000117528	1.69455	0.000110428	0.0018599	ABCD3	up	2.73051
ENSG00000117650	3.31219	0.000467085	0.00620248	NEK2	up	2.20743
ENSG00000117707	2.62457	0.000110144	0.00185674	PROX1	up	2.73125
ENSG00000117724	2.86609	1.51101e-11	1.59967e-09	CENPF	up	8.79597
ENSG00000117834	3.27253	0.000863587	0.010265	SLC5A9	up	1.98864
ENSG00000117906	1.57534	0.00412403	0.0346843	RCN2	up	1.45987
ENSG00000118193	2.9129	0.000794351	0.00958994	KIF14	up	2.01818
ENSG00000118432	2.78798	8.29505e-05	0.00147172	CNR1	up	2.83217
ENSG00000118705	1.71173	9.37431e-05	0.00162017	RPN2	up	2.79044
ENSG00000118922	1.88443	0.000109571	0.00185032	KLF12	up	2.73275
ENSG00000118965	1.64275	0.000449233	0.00598605	WDR35	up	2.22286
ENSG00000119042	1.58117	0.000164753	0.00261488	SATB2	up	2.58255
ENSG00000119285	2.31673	4.19369e-07	1.55392e-05	HEATR1	up	4.80857
ENSG00000119408	1.21083	0.00252483	0.0236732	NEK6	up	1.62574
ENSG00000119707	1.04365	0.00615387	0.0466088	RBM25	up	1.33153
ENSG00000119969	2.84917	1.23907e-05	0.000291151	HELLS	up	3.53588
ENSG00000120217	2.15219	0.00107198	0.012086	CD274	up	1.91772
ENSG00000120327	1.67883	0.00117092	0.0129887	PCDHB14	up	1.88643
ENSG00000120370	2.04185	0.00109022	0.0122629	GORAB	up	1.91141
ENSG00000120458	1.30263	0.005694	0.04392	MSANTD2	up	1.35734
ENSG00000120708	2.87582	7.5657e-07	2.62187e-05	TGFBI	up	4.58139
ENSG00000120802	1.59616	0.000284629	0.00413905	TMPO	up	2.3831
ENSG00000121005	1.55228	0.00266802	0.0246724	CRISPLD1	up	1.60779
ENSG00000121039	2.66242	4.50863e-06	0.00012167	RDH10	up	3.91482
ENSG00000121152	2.49028	0.000302425	0.00433243	NCAPH	up	2.36327
ENSG00000121481	2.15292	0.00108323	0.0121914	RNF2	up	1.91395
ENSG00000121644	2.03815	3.9033e-06	0.000106679	DESI2	up	3.97192
ENSG00000121904	2.39851	7.47785e-08	3.49716e-06	CSMD2	up	5.45628
ENSG00000122176	2.11187	0.0039965	0.0339227	FMOD	up	1.46951
ENSG00000122482	1.58104	0.00140324	0.0150126	ZNF644	up	1.82354
ENSG00000122550	1.63909	9.91759e-05	0.00169408	KLHL7	up	2.77107
ENSG00000122565	1.57355	0.0001595	0.00255042	CBX3	up	2.59339
ENSG00000122566	1.16897	0.00094629	0.010964	HNRNPA2B1	up	1.96003
ENSG00000122584	2.52404	0.000704935	0.00877435	NXPH1	up	2.05679
ENSG00000122591	1.88263	0.000470271	0.0062319	HYCC1	up	2.20538
ENSG00000122643	1.9402	3.74343e-05	0.000747445	NT5C3A	up	3.12642
ENSG00000122644	1.98611	3.37406e-05	0.000687988	ARL4A	up	3.16242
ENSG00000122779	1.94783	2.26406e-05	0.000490708	TRIM24	up	3.30918
ENSG00000122861	1.55019	0.00176204	0.0178595	PLAU	up	1.74813
ENSG00000122952	2.63421	9.50917e-07	3.15901e-05	ZWINT	up	4.50045
ENSG00000122970	1.77939	0.000693367	0.00865832	IFT81	up	2.06257
ENSG00000123080	2.1081	3.13101e-05	0.000650791	CDKN2C	up	3.18656
ENSG00000123131	2.42981	5.62511e-05	0.00106573	PRDX4	up	2.97235
ENSG00000123146	1.61943	0.00370884	0.0319169	ADGRE5	up	1.49598
ENSG00000123219	3.58358	8.96603e-05	0.00156625	CENPK	up	2.80514
ENSG00000123374	1.81999	0.000167907	0.00265837	CDK2	up	2.57538
ENSG00000123473	1.85427	0.00527278	0.0416964	STIL	up	1.3799
ENSG00000123485	2.58473	3.29269e-06	9.23487e-05	HJURP	up	4.03457
ENSG00000123983	1.74949	0.000407425	0.0055051	ACSL3	up	2.25924
ENSG00000124766	1.9574	0.000354514	0.00492485	SOX4	up	2.30761
ENSG00000124783	1.41667	0.0029133	0.0263909	SSR1	up	1.57855
ENSG00000124789	1.39324	0.00172285	0.0175454	NUP153	up	1.75584
ENSG00000124795	1.45397	0.000839764	0.0100438	DEK	up	1.9981
ENSG00000125266	1.51028	0.00589498	0.0451269	EFNB2	up	1.34556
ENSG00000125355	2.72559	1.42354e-07	6.06833e-06	TMEM255A	up	5.21693
ENSG00000125398	1.14956	0.00500266	0.0402259	SOX9	up	1.39549
ENSG00000125430	3.92766	5.07823e-07	1.84618e-05	HS3ST3B1	up	4.73373
ENSG00000125810	2.32676	0.000710289	0.00882388	CD93	up	2.05434
ENSG00000125931	2.35683	6.6119e-06	0.000168963	CITED1	up	3.77221
ENSG00000125944	1.32444	0.00101066	0.0115776	HNRNPR	up	1.93638
ENSG00000126261	1.2559	0.00261677	0.0242971	UBA2	up	1.61445
ENSG00000126785	1.62537	2.1782e-05	0.00047477	RHOJ	up	3.32352
ENSG00000126787	3.63919	6.63097e-05	0.00121335	DLGAP5	up	2.91601
ENSG00000127124	1.80557	0.000362991	0.00501421	HIVEP3	up	2.2998
ENSG00000127483	1.2206	0.00136151	0.0146556	HP1BP3	up	1.834
ENSG00000127863	2.24982	0.000602647	0.00766682	TNFRSF19	up	2.11538
ENSG00000127920	1.74608	0.000910859	0.0106625	GNG11	up	1.97214
ENSG00000127947	1.6758	1.7711e-05	0.000397734	PTPN12	up	3.40041
ENSG00000127995	1.56889	0.00124278	0.0136444	CASD1	up	1.86505
ENSG00000128050	1.72093	0.0034298	0.0299165	PAICS	up	1.52409
ENSG00000128342	3.1107	3.35848e-05	0.000686228	LIF	up	3.16353
ENSG00000128534	1.30095	0.002443	0.0231084	LSM8	up	1.63623
ENSG00000128567	2.0884	1.21005e-07	5.29892e-06	PODXL	up	5.27581
ENSG00000128595	1.92845	1.01895e-05	0.00024603	CALU	up	3.60901
ENSG00000128708	1.47065	0.00466097	0.0381025	HAT1	up	1.41905
ENSG00000128710	4.23358	0.00574439	0.0442235	HOXD10	up	1.35435
ENSG00000129083	1.08156	0.00562316	0.0435829	COPB1	up	1.36068
ENSG00000129173	3.7198	0.00291495	0.0263935	E2F8	up	1.5785
ENSG00000129195	2.6161	8.52062e-07	2.88533e-05	PIMREG	up	4.5398
ENSG00000129235	1.31842	0.00188345	0.0188619	TXNDC17	up	1.72441
ENSG00000129474	2.48024	0.00170106	0.017397	AJUBA	up	1.75953
ENSG00000129910	4.24522	0.00566581	0.043755	CDH15	up	1.35897
ENSG00000130600	4.37918	2.61237e-07	1.021e-05	H19	up	4.99098
ENSG00000131747	3.54286	1.95735e-12	2.4812e-10	TOP2A	up	9.60534
ENSG00000131873	1.64309	0.000910802	0.0106625	CHSY1	up	1.97214
ENSG00000131981	1.89563	0.000431011	0.00577921	LGALS3	up	2.23813
ENSG00000132122	1.47603	0.00113921	0.0127249	SPATA6	up	1.89535
ENSG00000132274	1.11982	0.00542865	0.0425373	TRIM22	up	1.37123
ENSG00000132646	1.94582	1.74929e-05	0.00039409	PCNA	up	3.4044
ENSG00000132680	1.11232	0.00639963	0.0480359	KHDC4	up	1.31843
ENSG00000132688	2.8539	3.89269e-12	4.68777e-10	NES	up	9.32903
ENSG00000133048	2.61053	3.04337e-13	4.51074e-11	CHI3L1	up	10.3458
ENSG00000133110	6.16614	2.64965e-33	5.67261e-30	POSTN	up	29.2462
ENSG00000133216	1.37294	0.0044072	0.0365238	EPHB2	up	1.43742
ENSG00000133657	1.97211	0.000368697	0.0050765	ATP13A3	up	2.29444
ENSG00000133740	1.58377	0.00376467	0.0322964	E2F5	up	1.49085
ENSG00000134049	1.68019	0.00112771	0.0126295	IER3IP1	up	1.89861
ENSG00000134057	2.83189	4.32713e-07	1.60029e-05	CCNB1	up	4.7958
ENSG00000134121	2.11821	2.77195e-05	0.000586923	CHL1	up	3.23142
ENSG00000134215	1.8423	0.00182232	0.0183354	VAV3	up	1.73671
ENSG00000134250	1.44646	0.00192579	0.019226	NOTCH2	up	1.71611
ENSG00000134255	2.37751	0.00256127	0.0239218	CEPT1	up	1.62121
ENSG00000134333	1.46836	0.0049061	0.0397021	LDHA	up	1.40119
ENSG00000134531	2.13116	5.77146e-06	0.000149871	EMP1	up	3.82428
ENSG00000134668	2.17354	0.00104943	0.0119224	SPOCD1	up	1.92364
ENSG00000134690	2.9123	2.89131e-06	8.26553e-05	CDCA8	up	4.08273
ENSG00000134717	1.36678	0.00259305	0.0241366	BTF3L4	up	1.61732
ENSG00000134910	1.24863	0.00289466	0.0262343	STT3A	up	1.58113
ENSG00000134954	1.98621	0.000193922	0.00300603	ETS1	up	2.52201
ENSG00000134986	1.50728	0.00151579	0.0159146	NREP	up	1.79821
ENSG00000135046	1.94487	0.00571133	0.0440008	ANXA1	up	1.35654
ENSG00000135074	2.01042	5.82306e-06	0.000151008	ADAM19	up	3.821
ENSG00000135164	1.20713	0.00126818	0.0138909	DMTF1	up	1.85727
ENSG00000135249	1.48228	0.00172682	0.0175673	RINT1	up	1.7553
ENSG00000135318	1.80606	0.00106418	0.0120309	NT5E	up	1.9197
ENSG00000135451	2.3709	2.18961e-05	0.000475641	TROAP	up	3.32272
ENSG00000135476	2.89786	7.21568e-06	0.000182937	ESPL1	up	3.7377
ENSG00000135535	1.54304	0.00346578	0.0301893	CD164	up	1.52015
ENSG00000135549	3.14865	1.68115e-07	6.99619e-06	PKIB	up	5.15514
ENSG00000135679	1.87805	0.00240943	0.0229109	MDM2	up	1.63996
ENSG00000135823	1.31735	0.00553746	0.0431792	STX6	up	1.36473
ENSG00000135862	2.89328	4.04328e-11	3.99517e-09	LAMC1	up	8.39846
ENSG00000136108	2.35598	0.00020209	0.00312258	CKAP2	up	2.50549
ENSG00000136122	2.02963	0.00437953	0.0363857	BORA	up	1.43907
ENSG00000136158	2.13673	0.000140907	0.00229588	SPRY2	up	2.63905
ENSG00000136231	6.42684	3.78695e-11	3.76119e-09	IGF2BP3	up	8.42467
ENSG00000136240	1.27746	0.000526802	0.00687698	KDELR2	up	2.1626
ENSG00000136243	1.48978	0.0017937	0.0181042	NUP42	up	1.74222
ENSG00000136261	1.4246	0.00267787	0.024735	BZW2	up	1.60669
ENSG00000136492	2.47336	0.00541217	0.04246	BRIP1	up	1.37202
ENSG00000136527	1.42019	0.00244441	0.0231103	TRA2B	up	1.63619
ENSG00000137309	1.36747	0.00466346	0.0381066	HMGA1	up	1.419
ENSG00000137504	1.31194	0.00191398	0.0191279	CREBZF	up	1.71833
ENSG00000137563	2.05938	0.000897172	0.0105407	GGH	up	1.97713
ENSG00000137752	1.3235	0.00518206	0.041184	CASP1	up	1.38527
ENSG00000137770	1.39896	0.00444003	0.0366697	CTDSPL2	up	1.43569
ENSG00000137804	2.54051	8.88671e-07	2.98829e-05	NUSAP1	up	4.52458
ENSG00000137807	2.59208	0.000111791	0.00187466	KIF23	up	2.72708
ENSG00000137872	2.05103	1.82625e-05	0.000408215	SEMA6D	up	3.38911
ENSG00000137942	1.40256	0.00628765	0.0473244	FNBP1L	up	1.32491
ENSG00000137962	1.58763	0.00198581	0.019652	ARHGAP29	up	1.70659
ENSG00000138160	3.19939	1.59092e-05	0.000361059	KIF11	up	3.44242
ENSG00000138180	3.76003	0.000751635	0.0091894	CEP55	up	2.03671
ENSG00000138376	2.26543	0.000269906	0.0039578	BARD1	up	2.40255
ENSG00000138413	1.85475	2.99337e-05	0.000625557	IDH1	up	3.20373
ENSG00000138468	2.14522	7.40644e-05	0.00133122	SENP7	up	2.87575
ENSG00000138755	5.11648	4.95128e-06	0.000131952	CXCL9	up	3.87958
ENSG00000138778	3.00757	9.15842e-06	0.00022537	CENPE	up	3.6471
ENSG00000138792	2.99506	0.00131889	0.0143254	ENPEP	up	1.84389
ENSG00000139146	2.24988	0.000301486	0.0043232	SINHCAF	up	2.36419
ENSG00000139289	2.44154	8.84979e-06	0.000218333	PHLDA1	up	3.66088
ENSG00000139318	1.37765	0.00567423	0.0438025	DUSP6	up	1.3585
ENSG00000139329	3.58899	0.00530653	0.0418356	LUM	up	1.37845
ENSG00000139350	1.80879	0.00210188	0.0205474	NEDD1	up	1.68724
ENSG00000139354	3.11644	0.00502224	0.0402867	GAS2L3	up	1.39484
ENSG00000139496	1.48245	0.003146	0.0280376	NUP58	up	1.55226
ENSG00000139679	1.17914	0.00454205	0.0373208	LPAR6	up	1.42805
ENSG00000139687	1.51297	0.000917818	0.0107244	RB1	up	1.96963
ENSG00000139921	2.14587	0.000359238	0.00497613	TMX1	up	2.30311
ENSG00000140262	2.13585	4.94992e-08	2.39035e-06	TCF12	up	5.62154
ENSG00000141510	1.25652	0.0055254	0.0431375	TP53	up	1.36514
ENSG00000142700	2.06378	0.000358777	0.00497332	DMRTA2	up	2.30335
ENSG00000142798	1.91172	6.50751e-05	0.00119416	HSPG2	up	2.92294
ENSG00000142864	1.3658	0.000224117	0.00339221	SERBP1	up	2.46952
ENSG00000142945	2.46634	4.85225e-06	0.000129672	KIF2C	up	3.88716
ENSG00000143033	1.3431	0.00417052	0.0350142	MTF2	up	1.45576
ENSG00000143195	2.53959	7.29286e-09	4.29721e-07	ILDR2	up	6.36681
ENSG00000143228	3.0662	3.23209e-06	9.11209e-05	NUF2	up	4.04038
ENSG00000143324	1.37141	0.000731582	0.00900136	XPR1	up	2.04569
ENSG00000143398	1.23652	0.00230943	0.0222046	PIP5K1A	up	1.65356
ENSG00000143476	2.81234	2.98398e-05	0.000624949	DTL	up	3.20416
ENSG00000143554	1.18783	0.00240776	0.02291	SLC27A3	up	1.63997
ENSG00000143621	1.58496	0.000125263	0.00206642	ILF2	up	2.68478
ENSG00000143702	1.36281	0.00348031	0.0302748	CEP170	up	1.51892
ENSG00000143702	1.36281	0.00348031	0.0302748	CEP170P1	up	1.51892
ENSG00000143786	2.17733	0.000291934	0.00422931	CNIH3	up	2.37373
ENSG00000143870	1.81163	8.0449e-05	0.00143262	PDIA6	up	2.84387
ENSG00000143995	1.51834	0.000168106	0.00265932	MEIS1	up	2.57523
ENSG00000144224	1.19436	0.00323034	0.0286548	UBXN4	up	1.5428
ENSG00000144354	2.15224	0.00259545	0.0241473	CDCA7	up	1.61713
ENSG00000144554	1.99173	0.000375194	0.0051527	FANCD2	up	2.28797
ENSG00000144791	1.83886	7.38236e-05	0.00132814	LIMD1	up	2.87676
ENSG00000145041	1.50936	0.00160084	0.0165566	DCAF1	up	1.78103
ENSG00000145349	1.98994	7.64005e-07	2.64288e-05	CAMK2D	up	4.57792
ENSG00000145623	1.75605	8.87493e-05	0.00155372	OSMR	up	2.80863
ENSG00000145730	1.67712	0.00115897	0.0129081	PAM	up	1.88914
ENSG00000145740	1.70107	0.00118178	0.013094	SLC30A5	up	1.88293
ENSG00000145781	1.87749	0.00459283	0.0376733	COMMD10	up	1.42397
ENSG00000145908	1.89455	3.15569e-05	0.000653806	ZNF300	up	3.18455
ENSG00000146463	1.20382	0.00138958	0.0148912	ZMYM4	up	1.82707
ENSG00000146592	1.57184	0.000421444	0.00566671	CREB5	up	2.24667
ENSG00000146670	2.30035	0.000119295	0.00198153	CDCA5	up	2.703
ENSG00000146674	2.16834	2.63812e-05	0.000560434	IGFBP3	up	3.25148
ENSG00000146731	1.16262	0.00168508	0.0172795	CCT6A	up	1.76247
ENSG00000146757	2.06698	0.000304204	0.00435468	ZNF92	up	2.36104
ENSG00000146842	2.43092	4.43489e-06	0.000120185	TMEM209	up	3.92015
ENSG00000146909	1.55023	0.00101793	0.01164	NOM1	up	1.93405
ENSG00000146918	2.25832	1.41754e-05	0.000327889	NCAPG2	up	3.48427
ENSG00000146938	2.15209	6.28929e-05	0.00116465	NLGN4X	up	2.9338
ENSG00000147162	1.47161	0.000509929	0.00668389	OGT	up	2.17497
ENSG00000147180	1.78941	0.000139439	0.00228074	ZNF711	up	2.64192
ENSG00000147274	1.06837	0.00562074	0.0435816	RBMX	up	1.3607
ENSG00000147854	1.31093	0.00325964	0.0288104	UHRF2	up	1.54045
ENSG00000148110	1.37882	0.00484618	0.0393826	MFSD14B	up	1.4047
ENSG00000148773	2.62928	4.06606e-05	0.000802714	MKI67	up	3.09544
ENSG00000148848	2.79241	6.80008e-07	2.38659e-05	ADAM12	up	4.62222
ENSG00000149257	1.81873	0.000171095	0.00270217	SERPINH1	up	2.56829
ENSG00000150893	3.26296	1.77254e-07	7.31332e-06	FREM2	up	5.13589
ENSG00000151135	1.63272	0.00403268	0.0341246	TMEM263	up	1.46693
ENSG00000151498	1.18424	0.00321464	0.0285304	ACAD8	up	1.54469
ENSG00000151576	1.45675	0.00355491	0.030854	QTRT2	up	1.51069
ENSG00000151725	2.6149	7.16518e-06	0.000181896	CENPU	up	3.74018
ENSG00000151746	1.85144	0.000247915	0.00369151	BICD1	up	2.4328
ENSG00000151835	2.23906	7.99236e-08	3.67534e-06	SACS	up	5.4347
ENSG00000152049	2.78063	7.09115e-05	0.00128535	KCNE4	up	2.89098
ENSG00000152253	2.44837	0.00255292	0.0238669	SPC25	up	1.6222
ENSG00000152443	1.86468	0.000174456	0.00275074	ZNF776	up	2.56055
ENSG00000152527	2.143	3.02426e-06	8.62005e-05	PLEKHH2	up	4.06449
ENSG00000152926	1.88851	1.72158e-05	0.000388424	ZNF117	up	3.41069
ENSG00000152926	1.88851	1.72158e-05	0.000388424	ERV3-1-ZNF117	up	3.41069
ENSG00000152952	1.69538	0.00149323	0.0157566	PLOD2	up	1.80254
ENSG00000152953	2.55392	2.19774e-06	6.47492e-05	STK32B	up	4.18877
ENSG00000152977	2.39933	1.07713e-06	3.49986e-05	ZIC1	up	4.45595
ENSG00000153214	2.00438	0.000339573	0.00475847	TMEM87B	up	2.32253
ENSG00000153250	1.35238	0.00194842	0.0193616	RBMS1	up	1.71306
ENSG00000153560	1.30166	0.00554116	0.0431906	UBP1	up	1.36461
ENSG00000153914	1.45545	0.000289242	0.00419662	SREK1	up	2.3771
ENSG00000153922	1.52511	0.00294668	0.0265933	CHD1	up	1.57523
ENSG00000153936	1.75119	0.000192641	0.00299339	HS2ST1	up	2.52384
ENSG00000153944	1.02927	0.00592432	0.0452975	MSI2	up	1.34393
ENSG00000153989	1.40935	0.00286769	0.0260881	NUS1	up	1.58356
ENSG00000154839	3.31699	9.01299e-05	0.0015716	SKA1	up	2.80366
ENSG00000155189	1.55488	0.00114149	0.0127429	AGPAT5	up	1.89473
ENSG00000155438	1.19002	0.00613701	0.046536	NIFK	up	1.33221
ENSG00000155545	1.76841	0.00262772	0.0243652	MIER3	up	1.61323
ENSG00000155660	1.43732	0.000294286	0.00425487	PDIA4	up	2.37111
ENSG00000155760	2.33868	7.69712e-07	2.6531e-05	FZD7	up	4.57625
ENSG00000155850	1.60736	0.00254447	0.0237994	SLC26A2	up	1.62343
ENSG00000155903	1.77086	0.0007942	0.00958994	RASA2	up	2.01818
ENSG00000156140	2.72168	0.00297327	0.0268082	ADAMTS3	up	1.57173
ENSG00000156265	2.26454	0.00234918	0.0224859	MAP3K7CL	up	1.64809
ENSG00000156531	2.06016	0.00156754	0.0163425	PHF6	up	1.78668
ENSG00000156928	1.17519	0.0051064	0.0407581	MALSU1	up	1.38979
ENSG00000156970	3.04347	1.76504e-05	0.000396835	BUB1B	up	3.40139
ENSG00000157106	1.27924	0.00464046	0.0379735	SMG1	up	1.42052
ENSG00000157224	1.70043	0.00165867	0.0170521	CLDN12	up	1.76822
ENSG00000157227	2.13159	1.18948e-07	5.22071e-06	MMP14	up	5.28227
ENSG00000157456	2.91922	5.37761e-05	0.00102185	CCNB2	up	2.99061
ENSG00000158470	2.35457	2.01862e-06	6.01379e-05	B4GALT5	up	4.22085
ENSG00000158473	3.717	0.00526947	0.0416964	CD1D	up	1.3799
ENSG00000158710	1.51005	0.000623548	0.00790949	TAGLN2	up	2.10185
ENSG00000159086	1.49829	0.000729725	0.00898424	PAXBP1	up	2.04652
ENSG00000159200	1.46553	0.00408851	0.0344457	RCAN1	up	1.46286
ENSG00000159403	1.0622	0.00637255	0.0478699	C1R	up	1.31994
ENSG00000159579	1.46065	0.00143059	0.015222	RSPRY1	up	1.81753
ENSG00000161800	1.42324	0.00524651	0.0415665	RACGAP1	up	1.38126
ENSG00000161847	2.10446	0.000449124	0.00598605	RAVER1	up	2.22286
ENSG00000161888	2.28465	8.81719e-05	0.00154726	SPC24	up	2.81044
ENSG00000162490	2.65311	2.8265e-06	8.12852e-05	DRAXIN	up	4.08999
ENSG00000162493	2.21909	1.87619e-06	5.65567e-05	PDPN	up	4.24752
ENSG00000162521	1.32524	0.00031054	0.00443549	RBBP4	up	2.35306
ENSG00000162595	2.54696	2.29444e-05	0.000496609	DIRAS3	up	3.30399
ENSG00000162601	1.93513	0.000432229	0.00579151	MYSM1	up	2.23721
ENSG00000162607	1.99887	2.11463e-05	0.000461958	USP1	up	3.3354
ENSG00000162670	1.97265	0.00156826	0.0163425	BRINP3	up	1.78668
ENSG00000162694	2.09026	1.01842e-05	0.00024603	EXTL2	up	3.60901
ENSG00000162695	2.17279	0.00335389	0.0294275	SLC30A7	up	1.53125
ENSG00000162873	2.80651	1.31396e-08	7.35968e-07	KLHDC8A	up	6.13314
ENSG00000162923	1.21536	0.00193716	0.0193095	WDR26	up	1.71423
ENSG00000162975	2.10441	3.26629e-08	1.64751e-06	KCNF1	up	5.78317
ENSG00000162981	2.44712	8.52309e-05	0.00150542	LRATD1	up	2.82234
ENSG00000163029	1.35356	0.00338416	0.0295984	SMC6	up	1.52873
ENSG00000163041	1.07005	0.00282163	0.0258154	H3-3A	up	1.58812
ENSG00000163069	1.73806	1.29636e-05	0.000303502	SGCB	up	3.51784
ENSG00000163251	2.52943	0.00328424	0.0289482	FZD5	up	1.53838
ENSG00000163320	1.18595	0.00439809	0.036464	CGGBP1	up	1.43814
ENSG00000163507	2.99653	0.000719877	0.00890727	CIP2A	up	2.05026
ENSG00000163527	1.51318	0.00379787	0.03248	STT3B	up	1.48838
ENSG00000163661	2.03406	0.00450215	0.037135	PTX3	up	1.43022
ENSG00000163808	2.89196	2.63424e-06	7.67876e-05	KIF15	up	4.11471
ENSG00000163873	2.76479	2.15852e-09	1.42922e-07	GRIK3	up	6.8449
ENSG00000164032	1.57182	0.00134775	0.0145563	H2AZ1	up	1.83695
ENSG00000164056	2.65756	2.64411e-06	7.69588e-05	SPRY1	up	4.11374
ENSG00000164104	1.53781	0.000368855	0.0050765	HMGB2	up	2.29444
ENSG00000164163	1.29718	0.00622056	0.0470031	ABCE1	up	1.32787
ENSG00000164180	2.68995	0.000458085	0.00609288	TMEM161B	up	2.21518
ENSG00000164197	2.11427	0.000112285	0.0018813	RNF180	up	2.72554
ENSG00000164244	1.86462	0.000179983	0.00281944	PRRC1	up	2.54984
ENSG00000164434	2.53127	2.76239e-12	3.43392e-10	FABP7	up	9.46421
ENSG00000164542	1.51867	0.00620943	0.0469558	MATCAP2	up	1.32831
ENSG00000164543	2.56322	5.36741e-09	3.30484e-07	STK17A	up	6.48085
ENSG00000164548	1.06668	0.00415906	0.0349484	TRA2A	up	1.45657
ENSG00000164611	2.43787	3.75082e-07	1.40605e-05	PTTG1	up	4.852
ENSG00000164631	1.57879	0.000192247	0.00298968	ZNF12	up	2.52438
ENSG00000164692	2.27393	5.41696e-06	0.000142199	COL1A2	up	3.8471
ENSG00000164930	2.16134	0.000972948	0.0112055	FZD6	up	1.95057
ENSG00000164932	2.56997	0.000624585	0.00791744	CTHRC1	up	2.10142
ENSG00000164934	1.61392	0.000634425	0.0080316	DCAF13	up	2.0952
ENSG00000165029	2.08104	0.000252352	0.00374312	ABCA1	up	2.42677
ENSG00000165304	3.26704	1.50823e-06	4.74073e-05	MELK	up	4.32416
ENSG00000165480	3.58897	0.000135828	0.00222545	SKA3	up	2.65258
ENSG00000165490	3.67594	0.00148793	0.0157265	DDIAS	up	1.80337
ENSG00000165494	1.20164	0.00441763	0.0365575	PCF11	up	1.43702
ENSG00000165501	2.32717	0.00151575	0.0159146	LRR1	up	1.79821
ENSG00000166037	1.1785	0.00648994	0.0485059	CEP57	up	1.31421
ENSG00000166068	1.53134	0.00208315	0.020385	SPRED1	up	1.69069
ENSG00000166225	1.84459	0.00151633	0.0159146	FRS2	up	1.79821
ENSG00000166226	1.95481	0.000695614	0.00868043	CCT2	up	2.06146
ENSG00000166341	1.52684	0.000548151	0.00709797	DCHS1	up	2.14887
ENSG00000166479	1.68024	0.000215725	0.00328844	TMX3	up	2.48301
ENSG00000166483	3.20824	9.0412e-11	8.1026e-09	WEE1	up	8.09138
ENSG00000166573	3.08604	0.00183446	0.018448	GALR1	up	1.73405
ENSG00000166803	2.5097	0.000515561	0.00674852	PCLAF	up	2.17079
ENSG00000166881	1.50171	0.00157824	0.0163921	NEMP1	up	1.78537
ENSG00000167306	2.69159	5.95413e-06	0.000154199	MYO5B	up	3.81192
ENSG00000167325	1.66275	0.00127742	0.0139611	RRM1	up	1.85508
ENSG00000167384	1.69363	0.00558449	0.0434229	ZNF180	up	1.36228
ENSG00000167553	1.76283	1.56459e-06	4.87019e-05	TUBA1C	up	4.31245
ENSG00000167555	1.4631	0.00102481	0.011691	ZNF528	up	1.93215
ENSG00000167595	2.23569	0.000210829	0.00322914	PROSER3	up	2.49091
ENSG00000167900	1.92187	0.00104029	0.0118396	TK1	up	1.92666
ENSG00000168078	5.44778	3.96601e-07	1.47523e-05	PBK	up	4.83114
ENSG00000168137	1.27788	0.00190929	0.0190909	SETD5	up	1.71917
ENSG00000168175	1.42004	0.000544456	0.00707388	MAPK1IP1L	up	2.15034
ENSG00000168246	1.52659	0.00192374	0.0192155	UBTD2	up	1.71635
ENSG00000168268	1.2935	0.00188501	0.0188677	NT5DC2	up	1.72428
ENSG00000168374	1.36024	0.00288297	0.02619	ARF4	up	1.58186
ENSG00000168386	1.53527	0.00433162	0.0360409	FILIP1L	up	1.4432
ENSG00000168411	1.67833	0.000256426	0.00379187	RFWD3	up	2.42115
ENSG00000168542	4.81681	1.79294e-15	3.56148e-13	COL3A1	up	12.4484
ENSG00000168615	1.88823	0.000233949	0.00352441	ADAM9	up	2.45291
ENSG00000168916	1.21761	0.0047861	0.038993	ZNF608	up	1.40901
ENSG00000169045	1.84934	3.02213e-06	8.62005e-05	HNRNPH1	up	4.06449
ENSG00000169436	1.78477	0.00452038	0.0372535	COL22A1	up	1.42883
ENSG00000169504	1.66936	0.000143044	0.00232588	CLIC4	up	2.63341
ENSG00000169607	2.53803	0.00137825	0.0148027	CKAP2L	up	1.82966
ENSG00000169679	3.54353	3.09127e-05	0.000643224	BUB1	up	3.19164
ENSG00000170144	1.29763	0.00152855	0.0159805	HNRNPA3	up	1.79641
ENSG00000170312	3.59817	1.09068e-05	0.000259767	CDK1	up	3.58542
ENSG00000170348	1.44416	0.00251586	0.0236351	TMED10	up	1.62644
ENSG00000170365	2.24748	0.000192958	0.0029959	SMAD1	up	2.52347
ENSG00000170379	2.80907	0.000308014	0.00440595	TCAF2	up	2.35596
ENSG00000170439	2.82233	2.94772e-09	1.92531e-07	METTL7B	up	6.7155
ENSG00000170558	2.26857	1.57551e-05	0.000358405	CDH2	up	3.44563
ENSG00000170961	2.00124	0.00283567	0.0258946	HAS2	up	1.58679
ENSG00000170962	2.69007	0.00137244	0.0147485	PDGFD	up	1.83125
ENSG00000171208	3.04125	8.1481e-08	3.72032e-06	NETO2	up	5.42942
ENSG00000171291	1.33895	0.00553594	0.0431792	ZNF439	up	1.36473
ENSG00000171385	1.28681	0.000847701	0.0101199	KCND3	up	1.99482
ENSG00000171444	1.77926	0.00015629	0.00250725	MCC	up	2.6008
ENSG00000171451	1.63764	0.000600056	0.00764169	DSEL	up	2.11681
ENSG00000171848	3.38204	2.70337e-10	2.15242e-08	RRM2	up	7.66707
ENSG00000171873	2.58365	4.95362e-05	0.000952558	ADRA1D	up	3.02111
ENSG00000171940	2.20894	1.04687e-05	0.000251823	ZNF217	up	3.5989
ENSG00000171951	2.62942	0.000562032	0.00724849	SCG2	up	2.13975
ENSG00000171988	1.32856	0.0021743	0.0211481	JMJD1C	up	1.67473
ENSG00000172020	1.87119	1.44563e-05	0.000333187	GAP43	up	3.47731
ENSG00000172262	1.31578	0.00595461	0.0455055	ZNF131	up	1.34194
ENSG00000172318	1.78618	0.0022726	0.0218942	B3GALT1	up	1.65967
ENSG00000172380	1.67435	6.49523e-05	0.00119304	GNG12	up	2.92334
ENSG00000172845	1.80747	0.000320552	0.00454147	SP3	up	2.3428
ENSG00000172936	1.35487	0.00233463	0.0223898	MYD88	up	1.64995
ENSG00000172965	2.394	2.40129e-07	9.52018e-06	MIR4435-2HG	up	5.02135
ENSG00000173114	1.75426	0.000145632	0.00236	LRRN3	up	2.62709
ENSG00000173404	2.37552	0.00659893	0.0491163	INSM1	up	1.30877
ENSG00000173852	2.24496	7.02932e-08	3.31151e-06	DPY19L1	up	5.47997
ENSG00000174021	1.53704	0.000161111	0.00256977	GNG5	up	2.59011
ENSG00000174136	1.99362	0.00237977	0.0227308	RGMB	up	1.64338
ENSG00000174343	3.78122	0.000477517	0.00630624	CHRNA9	up	2.20023
ENSG00000174371	2.44523	0.00249986	0.0235237	EXO1	up	1.62849
ENSG00000174780	1.63639	0.00091487	0.0107029	SRP72	up	1.9705
ENSG00000174953	1.42505	0.00287804	0.0261576	DHX36	up	1.5824
ENSG00000175063	2.9721	5.31991e-10	4.00407e-08	UBE2C	up	7.3975
ENSG00000175084	3.17214	2.55942e-05	0.000545519	DES	up	3.26319
ENSG00000175087	1.7558	0.00359879	0.0311228	PDIK1L	up	1.50692
ENSG00000175093	1.86593	0.00368221	0.0317161	SPSB4	up	1.49872
ENSG00000175455	1.516	0.0025244	0.0236732	CCDC14	up	1.62574
ENSG00000175928	1.67931	0.000384532	0.00524728	LRRN1	up	2.28007
ENSG00000176124	2.45454	0.00203312	0.0199939	DLEU1	up	1.6991
ENSG00000176124	2.45454	0.00203312	0.0199939	DLEU7-AS1	up	1.6991
ENSG00000176165	1.9869	2.65785e-06	7.72419e-05	FOXG1	up	4.11215
ENSG00000176593	1.29203	0.00563989	0.0436599	LOC100128398	up	1.35992
ENSG00000176619	1.14769	0.0060276	0.0459281	LMNB2	up	1.33792
ENSG00000176624	2.52425	4.0137e-07	1.4901e-05	MEX3C	up	4.82679
ENSG00000176887	2.67736	8.79878e-07	2.9639e-05	SOX11	up	4.52814
ENSG00000176890	2.42871	6.01293e-05	0.00113097	TYMS	up	2.94655
ENSG00000176907	2.75169	0.000426177	0.00572634	TCIM	up	2.24212
ENSG00000176971	1.8471	2.24476e-05	0.000487073	FIBIN	up	3.31241
ENSG00000177200	1.50053	0.000403967	0.0054622	CHD9	up	2.26263
ENSG00000177575	3.18879	6.93911e-15	1.26135e-12	CD163	up	11.8992
ENSG00000177697	1.13546	0.00162119	0.0167132	CD151	up	1.77694
ENSG00000177706	1.60973	0.000137011	0.00224293	FAM20C	up	2.64918
ENSG00000178202	1.58973	0.00074302	0.009113	POGLUT3	up	2.04034
ENSG00000178445	1.98597	4.9499e-07	1.80977e-05	GLDC	up	4.74238
ENSG00000178691	1.48992	0.00323709	0.0286769	SUZ12	up	1.54247
ENSG00000178904	1.64962	0.000130116	0.00214097	DPY19L3	up	2.66939
ENSG00000178921	1.24005	0.00421216	0.0353176	PFAS	up	1.45201
ENSG00000178999	2.20469	0.000105925	0.00179505	AURKB	up	2.74592
ENSG00000179241	2.18037	9.57921e-07	3.17134e-05	LDLRAD3	up	4.49876
ENSG00000179431	2.383	7.02668e-06	0.000178615	FJX1	up	3.74808
ENSG00000180198	1.74136	0.00123017	0.0135291	RCC1	up	1.86873
ENSG00000180447	3.45908	4.25726e-11	4.18514e-09	GAS1	up	8.37829
ENSG00000180801	2.96233	1.32986e-05	0.000309935	ARSJ	up	3.50873
ENSG00000180917	2.25942	4.46615e-05	0.000872756	CMTR2	up	3.05911
ENSG00000181104	2.6666	5.71849e-06	0.000149099	F2R	up	3.82653
ENSG00000181449	1.94916	7.26252e-07	2.52589e-05	SOX2	up	4.59759
ENSG00000181458	3.11591	0.00199853	0.0197273	TMEM45A	up	1.70493
ENSG00000182004	1.54649	0.000807082	0.00971321	SNRPE	up	2.01264
ENSG00000182287	1.83687	0.00140765	0.0150432	AP1S2	up	1.82266
ENSG00000182481	1.64119	0.00027077	0.00396745	KPNA2	up	2.40149
ENSG00000182704	1.59795	0.00604496	0.0459957	TSKU	up	1.33728
ENSG00000182718	1.6166	0.000276031	0.00402921	ANXA2	up	2.39478
ENSG00000182952	1.9157	0.000230282	0.00348006	HMGN4	up	2.45841
ENSG00000182957	1.37197	0.00020008	0.00309401	SPATA13	up	2.50948
ENSG00000182963	2.17346	2.52695e-05	0.000539792	GJC1	up	3.26777
ENSG00000183010	1.38384	0.00267371	0.0247084	PYCR1	up	1.60716
ENSG00000183054	1.98153	0.00404476	0.0341968	RGPD6	up	1.46601
ENSG00000183291	2.17487	3.92906e-05	0.000779662	SELENOF	up	3.10809
ENSG00000183458	1.70118	0.00106704	0.0120443	PKD1P3	up	1.91922
ENSG00000183474	2.1429	0.000160165	0.00255892	GTF2H2C	up	2.59194
ENSG00000183853	2.08161	8.52407e-05	0.00150542	KIRREL1	up	2.82234
ENSG00000183856	2.52069	1.32444e-07	5.70904e-06	IQGAP3	up	5.24344
ENSG00000184304	1.44774	0.0013196	0.0143254	PRKD1	up	1.84389
ENSG00000184384	1.91294	9.32981e-05	0.00161516	MAML2	up	2.79179
ENSG00000184408	2.58201	0.00252285	0.0236732	KCND2	up	1.62574
ENSG00000184445	1.77414	0.00103372	0.0117786	KNTC1	up	1.9289
ENSG00000184486	2.28598	2.24718e-07	8.96452e-06	POU3F2	up	5.04747
ENSG00000184588	1.36203	0.000377302	0.00517428	PDE4B	up	2.28615
ENSG00000184867	1.42815	0.00143052	0.015222	ARMCX2	up	1.81753
ENSG00000185008	1.73591	0.0010699	0.0120695	ROBO2	up	1.91831
ENSG00000185090	1.4971	0.0013075	0.0142414	MANEAL	up	1.84645
ENSG00000185551	1.68273	0.00452993	0.0373003	NR2F2	up	1.42829
ENSG00000185946	3.1187	3.68992e-05	0.000739058	RNPC3	up	3.13132
ENSG00000186185	2.68237	7.28944e-06	0.00018408	KIF18B	up	3.73499
ENSG00000186298	1.22906	0.00498344	0.0401425	PPP1CC	up	1.3964
ENSG00000187079	1.58793	0.000203867	0.00314501	TEAD1	up	2.50238
ENSG00000187416	3.69253	1.21939e-06	3.88352e-05	LHFPL3	up	4.41077
ENSG00000187498	3.11348	3.2138e-07	1.22864e-05	COL4A1	up	4.91058
ENSG00000187678	1.62094	0.00270749	0.0249487	SPRY4	up	1.60295
ENSG00000187741	1.53687	0.00371304	0.0319388	FANCA	up	1.49568
ENSG00000187944	4.28743	9.70375e-05	0.00166642	C2orf66	up	2.77822
ENSG00000187951	2.51754	0.00156327	0.0163081	LOC100288637	up	1.7876
ENSG00000188042	1.81553	0.000204384	0.00315046	ARL4C	up	2.50163
ENSG00000188529	1.85619	1.96606e-06	5.88231e-05	SRSF10	up	4.23045
ENSG00000188610	2.27657	0.00599807	0.0457679	FAM72B	up	1.33944
ENSG00000188643	1.15693	0.00283174	0.0258853	S100A16	up	1.58695
ENSG00000188732	1.25557	0.00388109	0.033045	FAM221A	up	1.48089
ENSG00000188766	2.72277	0.000754195	0.00921485	SPRED3	up	2.03551
ENSG00000188785	1.43453	0.00270481	0.0249479	ZNF548	up	1.60297
ENSG00000188820	2.13607	0.000791448	0.00957947	CALHM6	up	2.01866
ENSG00000188916	3.62965	3.6465e-08	1.81084e-06	INSYN2A	up	5.74212
ENSG00000189050	1.95086	0.000660725	0.00832626	RNFT1	up	2.07955
ENSG00000189057	2.12545	0.00528633	0.0417447	FAM111B	up	1.3794
ENSG00000196083	2.85123	1.51173e-05	0.000345119	IL1RAP	up	3.46203
ENSG00000196230	1.02719	0.00354194	0.0307553	TUBB	up	1.51208
ENSG00000196247	2.01324	0.000547245	0.00709099	ZNF107	up	2.14929
ENSG00000196305	1.08778	0.00494789	0.0398895	IARS1	up	1.39914
ENSG00000196313	1.36224	0.000778668	0.00945988	POM121	up	2.02411
ENSG00000196353	1.78452	0.0051612	0.0410764	CPNE4	up	1.38641
ENSG00000196584	3.09287	0.00221249	0.021433	XRCC2	up	1.66892
ENSG00000196632	1.51087	0.00604406	0.0459957	WNK3	up	1.33728
ENSG00000196757	1.34847	0.00207031	0.02028	ZNF700	up	1.69293
ENSG00000196924	1.34817	0.00076657	0.00933645	FLNA	up	2.02982
ENSG00000196937	2.1366	1.7436e-07	7.20936e-06	FAM3C	up	5.1421
ENSG00000196950	1.71226	0.00241317	0.0229274	SLC39A10	up	1.63964
ENSG00000197008	1.96109	0.000896193	0.0105407	ZNF138	up	1.97713
ENSG00000197121	2.44218	0.00015268	0.00246178	PGAP1	up	2.60875
ENSG00000197128	1.79009	0.00504142	0.0404068	ZNF772	up	1.39355
ENSG00000197261	4.21355	6.89893e-06	0.000175599	C6orf141	up	3.75548
ENSG00000197343	1.21135	0.00198166	0.0196312	ZNF655	up	1.70705
ENSG00000197451	1.349	0.000347038	0.00484897	HNRNPAB	up	2.31435
ENSG00000197496	1.82786	0.000278232	0.00405828	SLC2A10	up	2.39166
ENSG00000197635	2.66673	0.00532435	0.0419418	DPP4	up	1.37735
ENSG00000197977	1.52149	0.00201294	0.0198391	ELOVL2	up	1.70248
ENSG00000198315	1.49355	0.000337193	0.00473544	ZKSCAN8	up	2.32464
ENSG00000198369	1.26563	0.00102624	0.0117004	SPRED2	up	1.9318
ENSG00000198492	1.34682	0.0041351	0.0347623	YTHDF2	up	1.45889
ENSG00000198551	1.80156	0.000916172	0.0107117	ZNF627	up	1.97014
ENSG00000198554	2.37272	0.000798288	0.00962541	WDHD1	up	2.01658
ENSG00000198815	1.77666	7.84696e-05	0.00140385	FOXJ3	up	2.85268
ENSG00000198830	1.52548	3.23154e-05	0.000666652	HMGN2	up	3.1761
ENSG00000198856	1.70666	0.00256989	0.0239846	OSTC	up	1.62007
ENSG00000198890	1.98593	0.000299583	0.00430453	PRMT6	up	2.36607
ENSG00000198900	1.50463	0.00146245	0.0154997	TOP1	up	1.80968
ENSG00000198901	1.91167	4.06204e-05	0.000802714	PRC1	up	3.09544
ENSG00000198914	1.31763	0.00135951	0.0146505	POU3F3	up	1.83415
ENSG00000198960	1.15936	0.00660987	0.0491734	ARMCX6	up	1.30827
ENSG00000203880	1.67169	6.8895e-05	0.00125115	PCMTD2	up	2.90269
ENSG00000204138	1.11192	0.00662874	0.0492603	PHACTR4	up	1.3075
ENSG00000204262	2.10373	1.66998e-06	5.1487e-05	COL5A2	up	4.2883
ENSG00000205403	1.84981	0.000668223	0.00841524	CFI	up	2.07493
ENSG00000205413	1.87418	0.00100677	0.0115467	SAMD9	up	1.93754
ENSG00000213281	1.13798	0.00583291	0.0447584	NRAS	up	1.34913
ENSG00000213462	2.83614	9.46142e-06	0.000231642	ERV3-1	up	3.63518
ENSG00000213639	1.14782	0.00211519	0.0206566	PPP1CB	up	1.68494
ENSG00000213719	1.50775	0.000248177	0.00369256	CLIC1	up	2.43267
ENSG00000214787	3.0814	0.0042871	0.0357747	MS4A4E	up	1.44642
ENSG00000214870	2.19772	0.00506703	0.0405615	LINC02981	up	1.39189
ENSG00000215301	1.24048	0.00625323	0.0471759	DDX3X	up	1.32628
ENSG00000215472	3.81364	0.000836325	0.0100213	RPL17-C18orf32	up	1.99907
ENSG00000222041	2.00391	5.09143e-06	0.000135313	CYTOR	up	3.86866
ENSG00000223705	1.26439	0.0037239	0.0319894	NSUN5P1	up	1.49499
ENSG00000223839	1.49959	0.000759347	0.00926019	FAM95B1	up	2.03338
ENSG00000224986	3.63433	0.00569267	0.04392	PPP1R8P1	up	1.35734
ENSG00000225127	2.53523	0.00471468	0.03846	LINC00237	up	1.41499
ENSG00000225649	3.10258	0.000254408	0.00376782	LOC100506474	up	2.42391
ENSG00000225792	2.18528	0.000652993	0.008245	SNX10-AS1	up	2.08381
ENSG00000231437	1.88034	0.00524023	0.0415338	LINC01750	up	1.3816
ENSG00000233184	1.55092	0.00487731	0.0395355	DPH5-DT	up	1.40301
ENSG00000234231	4.44017	0.000186801	0.00291675	ANAPC1P4	up	2.5351
ENSG00000234444	1.95171	9.19311e-05	0.0015989	ZNF736	up	2.79618
ENSG00000234745	1.32283	0.00329215	0.0290001	HLA-B	up	1.5376
ENSG00000237541	3.24383	0.000326913	0.00461801	HLA-DQA1	up	2.33555
ENSG00000237541	3.24383	0.000326913	0.00461801	HLA-DQA2	up	2.33555
ENSG00000237649	2.82576	5.78352e-07	2.07517e-05	KIFC1	up	4.68295
ENSG00000239264	1.46867	0.00111116	0.0124693	TXNDC5	up	1.90416
ENSG00000240053	2.82533	1.61441e-08	8.77003e-07	LY6G5B	up	6.057
ENSG00000240342	1.41882	0.000568992	0.00732354	RPS2P5	up	2.13528
ENSG00000242125	1.35044	0.00275548	0.0252943	SNHG3	up	1.59698
ENSG00000242247	1.32564	0.00390475	0.0332171	ARFGAP3	up	1.47864
ENSG00000242294	2.86545	4.81996e-08	2.34522e-06	STAG3L5P	up	5.62982
ENSG00000242419	3.19443	0.00416602	0.0349917	PCDHGC4	up	1.45604
ENSG00000244026	1.68858	0.00230709	0.0221932	FAM86DP	up	1.65378
ENSG00000244038	1.40457	0.000381274	0.0052205	DDOST	up	2.28229
ENSG00000244405	1.46385	0.000781652	0.00949015	ETV5	up	2.02273
ENSG00000245526	1.55941	0.000118585	0.00197314	LINC00461	up	2.70484
ENSG00000249992	2.23266	9.12379e-07	3.04675e-05	TMEM158	up	4.51616
ENSG00000251247	2.15723	0.00659965	0.0491163	ZNF345	up	1.30877
ENSG00000251493	2.28499	0.00200058	0.0197374	FOXD1	up	1.70471
ENSG00000253729	1.25128	0.00110675	0.0124271	PRKDC	up	1.90563
ENSG00000254726	2.12822	1.18547e-05	0.000279579	MEX3A	up	3.5535
ENSG00000259948	5.50943	9.58692e-05	0.00165077	LOC124903574	up	2.78231
ENSG00000261934	3.02128	0.00170912	0.0174516	PCDHGA9	up	1.75816
ENSG00000263001	1.39574	0.000381872	0.00522208	GTF2I	up	2.28216
ENSG00000263956	1.37828	0.00233373	0.0223898	NBPF11	up	1.64995
ENSG00000266338	1.57423	0.00257049	0.0239846	NBPF15	up	1.62007
ENSG00000269713	1.26062	0.00523733	0.0415279	NBPF9	up	1.38166
ENSG00000271383	1.57758	0.000680906	0.00853591	NBPF19	up	2.06875
ENSG00000271425	1.49176	0.00622643	0.047029	NBPF10	up	1.32763
ENSG00000273136	1.85437	0.000872139	0.0103158	NBPF26	up	1.9865
ENSG00000274333	3.06745	6.27142e-05	0.00116302	LOC102724219	up	2.93441
ENSG00000275052	1.15749	0.00668288	0.0496016	PPP4R3B	up	1.3045
ENSG00000275395	3.36289	4.59107e-12	5.32896e-10	FCGBP	up	9.27336
ENSG00000275496	3.45359	0.000141079	0.00229588	LOC102723360	up	2.63905
ENSG00000275496	3.45359	0.000141079	0.00229588	LOC102724701	up	2.63905
ENSG00000276043	2.3226	8.11841e-05	0.00144437	UHRF1	up	2.84032
ENSG00000276077	2.62779	0.00446211	0.0368363	LOC102724951	up	1.43372
ENSG00000276256	1.66838	0.00160236	0.0165635	LOC389831	up	1.78085
ENSG00000277443	1.69966	8.40671e-06	0.000208738	MARCKS	up	3.6804
ENSG00000280987	2.23136	2.14379e-06	6.33575e-05	MATR3	up	4.1982
ENSG00000282458	1.68736	6.4605e-05	0.00118893	WASH5P	up	2.92484
ENSG00000000003	0.767207	0.12384	0.350699	TSPAN6	stable	0.455066
ENSG00000000005	-2.18032	0.31981	NA	TNMD	stable	NA
ENSG00000000419	0.996118	0.0700441	0.245652	DPM1	stable	0.60968
ENSG00000000457	0.253164	0.607229	0.816342	SCYL3	stable	0.0881278
ENSG00000000460	1.03944	0.0632729	0.229291	C1orf112	stable	0.639612
ENSG00000000938	0.047234	0.936199	0.977441	FGR	stable	0.00990924
ENSG00000000971	0.129918	0.839539	0.935939	CFH	stable	0.0287525
ENSG00000001036	0.39819	0.355767	0.627166	FUCA2	stable	0.202617
ENSG00000001084	-0.369462	0.541694	0.772641	GCLC	stable	0.112022
ENSG00000001167	0.179954	0.706183	0.871724	NFYA	stable	0.059621
ENSG00000001497	-0.269188	0.497356	0.742365	LAS1L	stable	0.129382
ENSG00000001561	-1.45252	0.136432	0.371034	ENPP4	stable	0.430586
ENSG00000001617	-0.674794	0.45477	0.709202	SEMA3F	stable	0.14923
ENSG00000001626	-0.632423	0.642263	0.837105	CFTR	stable	0.0772203
ENSG00000001629	0.277034	0.477993	0.727486	ANKIB1	stable	0.138176
ENSG00000001630	0.119235	0.835364	0.934172	CYP51A1	stable	0.029573
ENSG00000001631	1.12473	0.00951983	0.0639568	KRIT1	stable	1.19411
ENSG00000002016	0.770535	0.132952	0.365163	RAD52	stable	0.437514
ENSG00000002330	-0.670557	0.0841928	0.276406	BAD	stable	0.558453
ENSG00000002549	0.611916	0.237654	0.505365	LAP3	stable	0.296395
ENSG00000002586	-0.244031	0.627995	0.827967	CD99	stable	0.081987
ENSG00000002587	-0.122668	0.891327	0.958482	HS3ST1	stable	0.018416
ENSG00000002726	1.57328	0.574156	NA	AOC1	stable	NA
ENSG00000002745	0.212185	0.881197	0.954167	WNT16	stable	0.0203755
ENSG00000002822	-0.0293649	0.950376	0.983186	MAD1L1	stable	0.00736409
ENSG00000002834	0.306017	0.403944	0.669004	LASP1	stable	0.174571
ENSG00000002919	-0.150949	0.743672	0.891087	SNX11	stable	0.0500798
ENSG00000002933	0.571455	0.174043	0.425512	TMEM176A	stable	0.371088
ENSG00000003056	0.224045	0.54773	0.776404	M6PR	stable	0.109912
ENSG00000003096	2.28443	0.0083214	0.0582196	KLHL13	stable	1.23493
ENSG00000003137	-2.05511	0.071997	0.250133	CYP26B1	stable	0.601829
ENSG00000003249	-0.582845	0.440387	0.698793	DBNDD1	stable	0.155651
ENSG00000003393	0.289064	0.500041	0.743741	ALS2	stable	0.128578
ENSG00000003400	-0.516413	0.397298	0.663127	CASP10	stable	0.178404
ENSG00000003402	0.0554731	0.884188	0.955016	CFLAR	stable	0.0199895
ENSG00000003509	0.542008	0.288412	0.562909	NDUFAF7	stable	0.249561
ENSG00000003756	0.581526	0.11063	0.326835	RBM5	stable	0.485671
ENSG00000003987	-0.847418	0.258883	0.530682	MTMR7	stable	0.275166
ENSG00000004059	0.229145	0.56233	0.787369	ARF5	stable	0.103822
ENSG00000004139	0.248887	0.524324	0.760514	SARM1	stable	0.118893
ENSG00000004142	0.165645	0.660483	0.846437	POLDIP2	stable	0.0724053
ENSG00000004399	-0.923505	0.0126462	0.0785517	PLXND1	stable	1.10484
ENSG00000004455	0.934134	0.0153212	0.0891328	AK2	stable	1.04996
ENSG00000004478	-0.142937	0.772095	0.90458	FKBP4	stable	0.0435531
ENSG00000004487	0.906747	0.0152729	0.0889595	KDM1A	stable	1.05081
ENSG00000004534	-0.509074	0.336209	0.609873	RBM6	stable	0.214761
ENSG00000004700	1.25719	0.00993745	0.0659348	RECQL	stable	1.18089
ENSG00000004777	-0.335988	0.39594	0.662008	ARHGAP33	stable	0.179137
ENSG00000004779	0.107633	0.824173	0.92861	NDUFAB1	stable	0.0321664
ENSG00000004799	-1.66387	0.0945128	0.295917	PDK4	stable	0.52883
ENSG00000004809	-2.7787	0.363519	NA	SLC22A16	stable	NA
ENSG00000004838	-0.708303	0.344295	0.617335	ZMYND10	stable	0.209479
ENSG00000004848	0.268447	0.637383	0.834121	ARX	stable	0.0787707
ENSG00000004864	0.516129	0.231207	0.497476	SLC25A13	stable	0.303228
ENSG00000004866	-0.290067	0.559562	0.78509	ST7	stable	0.10508
ENSG00000004866	-0.290067	0.559562	0.78509	ST7-OT3	stable	0.10508
ENSG00000004897	0.576556	0.20515	0.466741	CDC27	stable	0.330924
ENSG00000004948	1.73154	0.530849	NA	CALCR	stable	NA
ENSG00000004961	0.543325	0.412246	0.67575	HCCS	stable	0.170214
ENSG00000004975	0.8247	0.038579	0.166109	DVL2	stable	0.779606
ENSG00000005007	0.00749456	0.984136	0.994664	UPF1	stable	0.00232348
ENSG00000005020	-0.301059	0.620185	0.823014	SKAP2	stable	0.0845926
ENSG00000005022	0.514368	0.365349	0.635546	SLC25A5	stable	0.196853
ENSG00000005073	1.82958	0.313187	0.587306	HOXA11	stable	0.231135
ENSG00000005075	-0.457426	0.376967	0.64575	POLR2J	stable	0.189936
ENSG00000005100	0.794142	0.102074	0.311444	DHX33	stable	0.50662
ENSG00000005108	1.4301	0.0355544	0.157594	THSD7A	stable	0.802459
ENSG00000005156	0.538232	0.196911	0.456402	LIG3	stable	0.340652
ENSG00000005175	1.07625	0.0491965	0.195326	RPAP3	stable	0.709239
ENSG00000005187	3.77712	0.247024	NA	ACSM3	stable	NA
ENSG00000005189	0.301941	0.668327	0.850933	REXO5	stable	0.0701045
ENSG00000005194	0.564154	0.1576	0.402363	CIAPIN1	stable	0.395382
ENSG00000005206	-0.309173	0.4938	0.739203	SPPL2B	stable	0.131236
ENSG00000005249	-1.28218	0.123563	0.350069	PRKAR2B	stable	0.455846
ENSG00000005302	0.561788	0.191545	0.449152	MSL3	stable	0.347607
ENSG00000005339	0.562856	0.157174	0.402014	CREBBP	stable	0.395759
ENSG00000005381	-2.62588	0.0323699	0.148451	MPO	stable	0.828417
ENSG00000005421	-2.44785	0.0326818	0.149434	PON1	stable	0.825551
ENSG00000005436	0.113445	0.821203	0.927637	GCFC2	stable	0.0326219
ENSG00000005448	0.0205215	0.964589	0.989009	WDR54	stable	0.00479997
ENSG00000005471	0.0537942	0.952554	0.984018	ABCB4	stable	0.00699697
ENSG00000005486	-0.447492	0.226488	0.491999	RHBDD2	stable	0.308036
ENSG00000005513	-0.327241	0.472186	0.722866	SOX8	stable	0.140942
ENSG00000005700	0.368378	0.437375	0.695777	IBTK	stable	0.15753
ENSG00000005801	0.59709	0.181521	0.435505	ZNF195	stable	0.361007
ENSG00000005810	0.333721	0.463592	0.716261	MYCBP2	stable	0.144929
ENSG00000005812	0.87234	0.129531	0.359839	FBXL3	stable	0.443892
ENSG00000005844	-1.1944	0.0660641	0.235858	ITGAL	stable	0.62735
ENSG00000005882	-0.526429	0.380669	0.64846	PDK2	stable	0.188117
ENSG00000005889	0.370237	0.431181	0.691123	ZFX	stable	0.160444
ENSG00000005893	0.361864	0.568605	0.791724	LAMP2	stable	0.101426
ENSG00000005961	-0.733771	0.42725	0.688725	ITGA2B	stable	0.161954
ENSG00000005981	-3.61511	0.0202473	0.108199	ASB4	stable	0.965776
ENSG00000006007	-0.620376	0.178394	0.431442	GDE1	stable	0.365077
ENSG00000006025	-0.284782	0.58664	0.80336	OSBPL7	stable	0.0950897
ENSG00000006047	-1.45932	0.232779	0.499239	YBX2	stable	0.301691
ENSG00000006062	0.106048	0.837182	0.934957	MAP3K14	stable	0.0292083
ENSG00000006118	-0.839992	0.0225562	0.116768	TMEM132A	stable	0.932675
ENSG00000006125	-0.165768	0.658952	0.845795	AP2B1	stable	0.0727348
ENSG00000006194	0.0932187	0.817585	0.926007	ZNF263	stable	0.0333859
ENSG00000006210	-0.772636	0.0921815	0.291907	CX3CL1	stable	0.534756
ENSG00000006282	-0.698096	0.0620283	0.226057	SPATA20	stable	0.645783
ENSG00000006283	-0.636877	0.208714	0.47191	CACNA1G	stable	0.326141
ENSG00000006377	-1.96102	0.240117	NA	DLX6	stable	NA
ENSG00000006451	0.671733	0.102443	0.31207	RALA	stable	0.505748
ENSG00000006453	-1.31214	0.36983	0.638943	BAIAP2L1	stable	0.194538
ENSG00000006459	0.406921	0.448121	0.704456	KDM7A	stable	0.152146
ENSG00000006530	0.697599	0.084876	0.277978	AGK	stable	0.55599
ENSG00000006534	-0.48627	0.358023	0.629272	ALDH3B1	stable	0.201162
ENSG00000006576	1.59373	0.00776436	0.0553883	PHTF2	stable	1.25658
ENSG00000006607	0.22828	0.596304	0.809161	FARP2	stable	0.091965
ENSG00000006625	0.553384	0.199174	0.459321	GGCT	stable	0.337884
ENSG00000006638	0.695186	0.523215	0.759379	TBXA2R	stable	0.119541
ENSG00000006652	0.850695	0.0335111	0.15173	IFRD1	stable	0.81893
ENSG00000006695	0.388734	0.513074	0.75227	COX10	stable	0.123626
ENSG00000006704	0.599725	0.248424	0.518314	GTF2IRD1	stable	0.285407
ENSG00000006712	-0.222678	0.601763	0.812983	PAF1	stable	0.0899185
ENSG00000006715	0.279315	0.504233	0.746395	VPS41	stable	0.127031
ENSG00000006744	-0.0502727	0.905019	0.96443	ELAC2	stable	0.0157292
ENSG00000006747	-0.504363	0.467483	0.719158	SCIN	stable	0.143175
ENSG00000006756	-0.0758957	0.87807	0.953637	ARSD	stable	0.0206168
ENSG00000006757	-1.0699	0.0914998	0.290687	PNPLA4	stable	0.536575
ENSG00000006837	-0.508203	0.463523	0.716261	CDKL3	stable	0.144929
ENSG00000007001	-2.90293	0.0926756	0.292877	UPP2	stable	0.533314
ENSG00000007047	-0.394804	0.370776	0.639751	MARK4	stable	0.193989
ENSG00000007062	-0.659158	0.366786	0.636525	PROM1	stable	0.196184
ENSG00000007080	-0.465598	0.23702	0.50457	CCDC124	stable	0.297078
ENSG00000007129	-0.855169	0.339026	0.612389	CEACAM21	stable	0.212972
ENSG00000007168	0.224733	0.626575	0.827382	PAFAH1B1	stable	0.0822937
ENSG00000007174	0.0969625	0.876019	0.952743	DNAH9	stable	0.0210244
ENSG00000007202	-0.0170587	0.966359	0.989425	BLTP2	stable	0.00461697
ENSG00000007237	-1.02047	0.030413	0.143066	GAS7	stable	0.844463
ENSG00000007255	-0.86232	0.130577	0.361378	TRAPPC6A	stable	0.442038
ENSG00000007312	0.343203	0.825163	0.929291	CD79B	stable	0.0318483
ENSG00000007314	-0.101816	0.940239	0.97874	SCN4A	stable	0.00933268
ENSG00000007341	0.323789	0.520853	0.758275	ST7L	stable	0.120173
ENSG00000007350	-1.25441	0.488047	0.734894	TKTL1	stable	0.133776
ENSG00000007372	-0.130035	0.812729	0.924384	PAX6	stable	0.0341477
ENSG00000007376	-0.391085	0.350018	0.622258	RPUSD1	stable	0.206029
ENSG00000007384	0.473757	0.379838	0.648113	RHBDF1	stable	0.188349
ENSG00000007392	0.0485789	0.929137	0.97438	LUC7L	stable	0.0112716
ENSG00000007516	-0.226055	0.737176	0.888466	BAIAP3	stable	0.051359
ENSG00000007520	-0.392505	0.301913	0.576787	TSR3	stable	0.238985
ENSG00000007541	-0.62086	0.109172	0.324069	PIGQ	stable	0.489362
ENSG00000007545	1.00904	0.0194715	0.105327	CRAMP1	stable	0.977459
ENSG00000007866	0.76944	0.161551	0.408018	TEAD3	stable	0.389321
ENSG00000007923	0.17494	0.671526	0.852762	DNAJC11	stable	0.0691721
ENSG00000007933	-0.140936	0.922283	0.97199	FMO3	stable	0.0123383
ENSG00000007944	-0.923428	0.210716	0.474474	MYLIP	stable	0.323787
ENSG00000007968	2.00404	0.00865388	0.0598718	E2F2	stable	1.22278
ENSG00000008018	0.217205	0.580477	0.799448	PSMB1	stable	0.0972098
ENSG00000008083	-0.515331	0.301375	0.576195	JARID2	stable	0.23943
ENSG00000008128	0.0861691	0.868272	0.949589	CDK11A	stable	0.0224644
ENSG00000008130	0.517769	0.260379	0.532024	NADK	stable	0.274069
ENSG00000008226	-1.47865	0.0460773	0.187197	DLEC1	stable	0.727702
ENSG00000008256	0.275358	0.511898	0.751772	CYTH3	stable	0.123914
ENSG00000008277	0.505897	0.323523	0.596864	ADAM22	stable	0.224124
ENSG00000008282	1.1189	0.0683442	0.241661	SYPL1	stable	0.616793
ENSG00000008283	-0.201398	0.733043	0.886256	CYB561	stable	0.0524407
ENSG00000008294	0.204029	0.583818	0.801805	SPAG9	stable	0.0959312
ENSG00000008300	-0.583965	0.245707	0.514709	CELSR3	stable	0.288438
ENSG00000008311	1.39657	0.00784032	0.0557238	AASS	stable	1.25396
ENSG00000008323	-1.15069	0.600472	NA	PLEKHG6	stable	NA
ENSG00000008324	-0.175461	0.717491	0.877252	SS18L2	stable	0.0568758
ENSG00000008382	-1.04382	0.0273641	0.133212	MPND	stable	0.875457
ENSG00000008394	-1.71575	0.0249894	0.125039	MGST1	stable	0.902956
ENSG00000008441	-0.767411	0.0345705	0.154646	NFIX	stable	0.810663
ENSG00000008513	-0.816353	0.124303	0.351425	ST3GAL1	stable	0.454167
ENSG00000008516	1.21747	0.209939	0.473443	MMP25	stable	0.324732
ENSG00000008517	-0.92088	0.0871083	0.282321	IL32	stable	0.549257
ENSG00000008710	-0.599739	0.129401	0.359836	PKD1	stable	0.443895
ENSG00000008838	0.393499	0.294128	0.568446	MED24	stable	0.245311
ENSG00000008869	0.682298	0.121343	0.346274	HEATR5B	stable	0.460581
ENSG00000008952	-0.926566	0.0568714	0.213262	SEC62	stable	0.671086
ENSG00000008988	-0.126335	0.739049	0.889093	RPS20	stable	0.0510529
ENSG00000009307	0.425265	0.276111	0.549398	CSDE1	stable	0.260113
ENSG00000009335	0.968803	0.0138248	0.0832164	UBE3C	stable	1.07979
ENSG00000009413	0.961644	0.0421902	0.176377	REV3L	stable	0.753559
ENSG00000009694	1.20345	0.0904032	0.28856	TENM1	stable	0.539764
ENSG00000009709	-1.86701	0.531226	NA	PAX7	stable	NA
ENSG00000009724	2.62202	0.0310173	0.144829	MASP2	stable	0.839145
ENSG00000009780	0.384033	0.493132	0.738625	FAM76A	stable	0.131576
ENSG00000009790	-0.564474	0.421872	0.684689	TRAF3IP3	stable	0.164507
ENSG00000009830	0.530634	0.20959	0.473045	POMT2	stable	0.325097
ENSG00000009844	0.82824	0.111659	0.329111	VTA1	stable	0.482658
ENSG00000009954	0.449869	0.28664	0.560709	BAZ1B	stable	0.251263
ENSG00000010017	0.740873	0.086038	0.280409	RANBP9	stable	0.552208
ENSG00000010030	0.0196264	0.984495	0.994664	ETV7	stable	0.00232348
ENSG00000010072	1.07411	0.0932619	0.293609	SPRTN	stable	0.53223
ENSG00000010165	0.796058	0.165118	0.413073	METTL13	stable	0.383973
ENSG00000010219	-0.270138	0.533878	0.767554	DYRK4	stable	0.114891
ENSG00000010244	1.01282	0.0191288	0.10397	ZNF207	stable	0.983091
ENSG00000010256	-0.594523	0.123964	0.350895	UQCRC1	stable	0.454823
ENSG00000010270	0.987133	0.0130105	0.0801937	STARD3NL	stable	1.09586
ENSG00000010278	0.743105	0.246567	0.51623	CD9	stable	0.287157
ENSG00000010292	0.771116	0.0565684	0.212717	NCAPD2	stable	0.672199
ENSG00000010295	-0.126619	0.742304	0.89072	IFFO1	stable	0.050259
ENSG00000010318	0.136083	0.866225	0.948809	PHF7	stable	0.0228214
ENSG00000010319	-0.922239	0.225651	0.490948	SEMA3G	stable	0.308965
ENSG00000010322	-0.473563	0.203541	0.464408	NISCH	stable	0.3331
ENSG00000010327	0.655321	0.0872381	0.282505	STAB1	stable	0.548974
ENSG00000010361	-0.630056	0.133337	0.365713	FUZ	stable	0.43686
ENSG00000010404	-0.517498	0.394971	0.661216	IDS	stable	0.179657
ENSG00000010539	0.662268	0.23223	0.498508	ZNF200	stable	0.302328
ENSG00000010610	-0.473708	0.296096	0.570676	CD4	stable	0.243611
ENSG00000010671	-0.166966	0.763584	0.90005	BTK	stable	0.0457334
ENSG00000010704	1.06703	0.125592	0.353476	HFE	stable	0.45164
ENSG00000010803	0.756402	0.146456	0.386298	SCMH1	stable	0.413077
ENSG00000010810	-0.00354013	0.993396	0.997265	FYN	stable	0.00118943
ENSG00000010818	-1.05944	0.0137577	0.0829165	HIVEP2	stable	1.08136
ENSG00000011007	0.692517	0.0807575	0.269164	ELOA	stable	0.569983
ENSG00000011009	0.454267	0.283136	0.55711	LYPLA2	stable	0.254059
ENSG00000011021	0.108685	0.802878	0.920089	CLCN6	stable	0.03617
ENSG00000011028	1.13279	0.0605283	0.222441	MRC2	stable	0.652785
ENSG00000011105	0.670906	0.298516	0.572719	TSPAN9	stable	0.242059
ENSG00000011114	0.681676	0.152375	0.395151	BTBD7	stable	0.403237
ENSG00000011132	0.0670198	0.886764	0.956322	APBA3	stable	0.0193957
ENSG00000011143	0.159901	0.757027	0.897295	MKS1	stable	0.0470649
ENSG00000011198	0.061659	0.926263	0.973457	ABHD5	stable	0.0116832
ENSG00000011201	-0.670468	0.212515	0.476466	ANOS1	stable	0.321968
ENSG00000011243	-0.733898	0.116159	0.337529	AKAP8L	stable	0.471688
ENSG00000011260	0.803549	0.0857672	0.279763	UTP18	stable	0.553209
ENSG00000011275	0.267854	0.525255	0.761406	RNF216	stable	0.118384
ENSG00000011295	0.671906	0.195345	0.454248	TTC19	stable	0.342707
ENSG00000011304	0.806365	0.0459627	0.187035	PTBP1	stable	0.728077
ENSG00000011332	-0.647464	0.34369	0.616594	DPF1	stable	0.21
ENSG00000011376	0.428547	0.356664	0.62823	LARS2	stable	0.201881
ENSG00000011405	0.741685	0.0994052	0.306063	PIK3C2A	stable	0.51419
ENSG00000011422	0.753989	0.168688	0.418042	PLAUR	stable	0.37878
ENSG00000011426	-1.17054	0.0200057	0.107463	ANLN	stable	0.96874
ENSG00000011451	0.236399	0.571249	0.793345	WIZ	stable	0.100538
ENSG00000011454	-0.204017	0.603245	0.814244	RABGAP1	stable	0.0892456
ENSG00000011465	0.434524	0.412543	0.675983	DCN	stable	0.170064
ENSG00000011478	-0.491585	0.36311	0.63397	QPCTL	stable	0.197931
ENSG00000011485	0.494331	0.195043	0.45415	PPP5C	stable	0.3428
ENSG00000011523	0.301358	0.565396	0.789413	CEP68	stable	0.102696
ENSG00000011566	1.18118	0.022346	0.115992	MAP4K3	stable	0.935572
ENSG00000011590	0.945566	0.605129	0.815645	ZBTB32	stable	0.0884989
ENSG00000011600	-0.795473	0.0793233	0.265901	TYROBP	stable	0.575279
ENSG00000011638	-0.107517	0.89809	0.961814	LDAF1	stable	0.0169089
ENSG00000012048	0.898129	0.103215	0.313583	BRCA1	stable	0.503648
ENSG00000012061	0.1773	0.637562	0.834121	ERCC1	stable	0.0787707
ENSG00000012174	1.19044	0.168388	0.417676	MBTPS2	stable	0.379161
ENSG00000012211	-0.224211	0.780785	0.909498	PRICKLE3	stable	0.0411982
ENSG00000012223	0.0701713	0.970393	0.990552	LTF	stable	0.00412269
ENSG00000012660	1.39035	0.049984	0.197353	ELOVL5	stable	0.704756
ENSG00000012779	-0.315771	0.534343	0.767895	ALOX5	stable	0.114698
ENSG00000012817	3.08618	0.117869	0.340494	KDM5D	stable	0.467891
ENSG00000012822	0.26194	0.5027	0.745652	CALCOCO1	stable	0.127464
ENSG00000012963	1.02987	0.0113184	0.0726702	UBR7	stable	1.13864
ENSG00000012983	1.06198	0.0632372	0.229205	MAP4K5	stable	0.639776
ENSG00000013275	-0.113709	0.777124	0.907327	PSMC4	stable	0.0422362
ENSG00000013288	-0.298442	0.48691	0.733868	MAN2B2	stable	0.134382
ENSG00000013306	-0.715993	0.133434	0.365875	SLC25A39	stable	0.436668
ENSG00000013364	-0.585417	0.228737	0.494954	MVP	stable	0.305435
ENSG00000013374	0.0907889	0.830268	0.932044	NUB1	stable	0.0305636
ENSG00000013375	0.679461	0.195547	0.45439	PGM3	stable	0.342571
ENSG00000013392	0.0443834	0.938608	0.978238	RWDD2A	stable	0.00955537
ENSG00000013441	0.2583	0.506007	0.747111	CLK1	stable	0.126615
ENSG00000013503	0.792548	0.173337	0.424433	POLR3B	stable	0.372191
ENSG00000013523	0.204689	0.610674	0.817966	ANGEL1	stable	0.087265
ENSG00000013561	0.510344	0.345568	0.618121	RNF14	stable	0.208926
ENSG00000013563	-0.455627	0.3107	0.585175	DNASE1L1	stable	0.232714
ENSG00000013573	0.734523	0.118555	0.341554	DDX11	stable	0.466541
ENSG00000013583	-0.548665	0.428305	0.688977	HEBP1	stable	0.161795
ENSG00000013588	-0.00476077	0.997067	0.99862	GPRC5A	stable	0.000599822
ENSG00000013619	0.570457	0.306728	0.581409	MAMLD1	stable	0.235518
ENSG00000013725	-1.39155	0.211631	0.475301	CD6	stable	0.323031
ENSG00000013810	1.0177	0.0223272	0.115926	TACC3	stable	0.93582
ENSG00000014123	0.751724	0.177625	0.430378	UFL1	stable	0.36615
ENSG00000014138	0.881429	0.0814422	0.270417	POLA2	stable	0.567967
ENSG00000014164	-0.815762	0.0812694	0.270055	ZC3H3	stable	0.568548
ENSG00000014216	-0.431488	0.277059	0.550234	CAPN1	stable	0.259452
ENSG00000014257	0.947379	0.544355	0.774012	ACP3	stable	0.111253
ENSG00000014641	-0.0921798	0.878207	0.953637	MDH1	stable	0.0206168
ENSG00000014824	0.325067	0.581042	0.799737	SLC30A9	stable	0.0970528
ENSG00000014919	-0.68768	0.144208	0.382673	COX15	stable	0.417172
ENSG00000015133	-1.09291	0.135848	0.370125	CCDC88C	stable	0.431652
ENSG00000015153	0.00545109	0.99189	0.997265	YAF2	stable	0.00118943
ENSG00000015171	-0.0685757	0.879688	0.953948	ZMYND11	stable	0.0204751
ENSG00000015475	-0.370242	0.40048	0.66651	BID	stable	0.176193
ENSG00000015479	0.317912	0.4956	0.740824	MATR3	stable	0.130285
ENSG00000015520	-0.882754	0.71143	NA	NPC1L1	stable	NA
ENSG00000015532	-0.261471	0.585751	0.80272	XYLT2	stable	0.0954358
ENSG00000015568	-1.70424	0.0189023	0.103205	RGPD5	stable	0.986301
ENSG00000015676	-0.317056	0.384613	0.651662	NUDCD3	stable	0.185978
ENSG00000016391	-0.546159	0.276992	0.550215	CHDH	stable	0.259468
ENSG00000016402	-1.79825	0.112268	0.330357	IL20RA	stable	0.481016
ENSG00000016864	0.731849	0.0559546	0.211545	GLT8D1	stable	0.674597
ENSG00000017260	0.132037	0.794796	0.915986	ATP2C1	stable	0.0381112
ENSG00000017427	-1.2999	0.159469	0.404882	IGF1	stable	0.392671
ENSG00000017483	-0.398333	0.449484	0.705177	SLC38A5	stable	0.151702
ENSG00000017797	-0.598518	0.114215	0.334096	RALBP1	stable	0.476128
ENSG00000018189	0.0571158	0.898709	0.962007	RUFY3	stable	0.0168219
ENSG00000018280	-0.403379	0.405776	0.6708	SLC11A1	stable	0.173407
ENSG00000018408	0.826501	0.0922683	0.292021	WWTR1	stable	0.534585
ENSG00000018510	0.583591	0.252537	0.522877	AGPS	stable	0.281601
ENSG00000018610	0.838944	0.156924	0.401594	STEEP1	stable	0.396212
ENSG00000018699	0.994119	0.0794134	0.266119	TTC27	stable	0.574924
ENSG00000018869	0.229301	0.72337	0.880644	ZNF582	stable	0.0551995
ENSG00000019102	-1.77388	0.159248	0.404536	VSIG2	stable	0.393043
ENSG00000019144	-0.961045	0.0102015	0.0671779	PHLDB1	stable	1.17277
ENSG00000019169	0.318808	0.868084	0.949589	MARCO	stable	0.0224644
ENSG00000019485	-0.245885	0.612119	0.818662	PRDM11	stable	0.0868952
ENSG00000019549	0.912686	0.490494	0.736693	SNAI2	stable	0.132714
ENSG00000019582	-0.443963	0.37032	0.639091	CD74	stable	0.194438
ENSG00000019991	-0.253888	0.820824	0.927495	HGF	stable	0.0326886
ENSG00000019995	-0.478179	0.341906	0.61492	ZRANB1	stable	0.211182
ENSG00000020181	-0.591258	0.332563	0.606747	ADGRA2	stable	0.216992
ENSG00000020219	0.458372	0.850853	NA	CCT8L1P	stable	NA
ENSG00000020256	1.51498	0.0301036	0.142061	ZFP64	stable	0.847524
ENSG00000020426	0.196033	0.704017	0.870556	MNAT1	stable	0.0602034
ENSG00000020577	0.197097	0.638492	0.834519	SAMD4A	stable	0.0785639
ENSG00000020633	0.632526	0.476017	0.726314	RUNX3	stable	0.138876
ENSG00000020922	-0.0205594	0.967267	0.989467	MRE11	stable	0.00459875
ENSG00000021355	-0.494806	0.348554	0.620758	SERPINB1	stable	0.207078
ENSG00000021488	-1.14073	0.185788	0.441525	SLC7A9	stable	0.355045
ENSG00000021574	1.27166	0.0647248	0.232802	SPAST	stable	0.633014
ENSG00000021762	-0.0884528	0.844188	0.93843	OSBPL5	stable	0.0275979
ENSG00000021776	0.317277	0.53955	0.771354	AQR	stable	0.112746
ENSG00000021826	0.00148107	0.998575	0.999197	CPS1	stable	0.000348741
ENSG00000022267	0.406301	0.386015	0.652891	FHL1	stable	0.185159
ENSG00000022277	-0.189658	0.647915	0.839883	RTF2	stable	0.0757812
ENSG00000022556	-1.46976	0.064847	0.233125	NLRP2	stable	0.632412
ENSG00000022567	-0.552206	0.341881	0.61492	SLC45A4	stable	0.211182
ENSG00000022840	-0.167113	0.644312	0.838041	RNF10	stable	0.0767346
ENSG00000022976	-0.105382	0.859081	0.945986	ZNF839	stable	0.0241151
ENSG00000023041	-0.0715363	0.865328	0.948503	ZDHHC6	stable	0.0229612
ENSG00000023191	-0.396939	0.43649	0.695246	RNH1	stable	0.157862
ENSG00000023228	0.14305	0.731624	0.885263	NDUFS1	stable	0.0529277
ENSG00000023287	-0.0124267	0.982584	0.994037	RB1CC1	stable	0.00259759
ENSG00000023318	0.417472	0.309041	0.583482	ERP44	stable	0.233973
ENSG00000023330	0.822419	0.131572	0.362752	ALAS1	stable	0.440391
ENSG00000023445	-0.242101	0.766252	0.901416	BIRC3	stable	0.0450749
ENSG00000023516	0.5424	0.383345	0.651119	AKAP11	stable	0.18634
ENSG00000023572	0.834076	0.288437	0.562909	GLRX2	stable	0.249561
ENSG00000023608	0.459888	0.504708	0.746554	SNAPC1	stable	0.126939
ENSG00000023697	0.14293	0.766595	0.901416	DERA	stable	0.0450749
ENSG00000023734	0.569309	0.221483	0.487663	STRAP	stable	0.31188
ENSG00000023839	2.15691	0.379614	NA	ABCC2	stable	NA
ENSG00000023892	-1.20331	0.0136844	0.0827592	DEF6	stable	1.08218
ENSG00000023902	-0.928991	0.0263218	0.129744	PLEKHO1	stable	0.886914
ENSG00000023909	1.00355	0.173214	0.424294	GCLM	stable	0.372333
ENSG00000024048	0.25835	0.607924	0.816624	UBR2	stable	0.0879776
ENSG00000024422	-0.174221	0.68151	0.858089	EHD2	stable	0.0664676
ENSG00000024862	-0.943395	0.0319256	0.147375	CCDC28A	stable	0.831577
ENSG00000025039	-0.648271	0.197976	0.457771	RRAGD	stable	0.339352
ENSG00000025156	0.332654	0.493033	0.738533	HSF2	stable	0.13163
ENSG00000025293	0.283327	0.538019	0.770275	PHF20	stable	0.113354
ENSG00000025423	-1.25073	0.216385	0.481111	HSD17B6	stable	0.317754
ENSG00000025434	-0.225798	0.686375	0.860783	NR1H3	stable	0.0651063
ENSG00000025708	0.210562	0.59619	0.809161	TYMP	stable	0.091965
ENSG00000025770	0.106746	0.802164	0.919833	NCAPH2	stable	0.0362911
ENSG00000025772	0.404423	0.409844	0.67345	TOMM34	stable	0.171695
ENSG00000025796	0.904535	0.0463788	0.187981	SEC63	stable	0.725885
ENSG00000025800	0.705835	0.0873701	0.282785	KPNA6	stable	0.548544
ENSG00000026036	0.101282	0.820485	0.927329	RTEL1-TNFRSF6B	stable	0.0327662
ENSG00000026103	-0.332656	0.696656	0.866984	FAS	stable	0.0619888
ENSG00000026508	0.960247	0.0168295	0.0953177	CD44	stable	1.02083
ENSG00000026559	-2.24919	0.0648891	0.233175	KCNG1	stable	0.632318
ENSG00000026652	-0.795698	0.0316297	0.146465	AGPAT4	stable	0.834266
ENSG00000026751	1.11275	0.428702	0.689511	SLAMF7	stable	0.161459
ENSG00000026950	0.654166	0.178081	0.430954	BTN3A1	stable	0.365569
ENSG00000027001	0.358984	0.504271	0.746395	MIPEP	stable	0.127031
ENSG00000027075	-0.0550171	0.927938	0.974006	PRKCH	stable	0.0114381
ENSG00000027644	0.165978	0.934808	NA	INSRR	stable	NA
ENSG00000027697	-0.69571	0.0927815	0.29305	IFNGR1	stable	0.533058
ENSG00000027847	0.0823356	0.84211	0.936931	B4GALT7	stable	0.0282923
ENSG00000027869	-0.226707	0.872403	0.951111	SH2D2A	stable	0.0217689
ENSG00000028116	-1.30352	0.0530614	0.204518	VRK2	stable	0.689268
ENSG00000028137	-0.242215	0.665893	0.849726	TNFRSF1B	stable	0.070721
ENSG00000028203	0.764565	0.0942084	0.295456	VEZT	stable	0.529506
ENSG00000028277	-1.35624	0.0167325	0.0949635	POU2F2	stable	1.02244
ENSG00000028310	0.200631	0.609145	0.816999	BRD9	stable	0.0877787
ENSG00000028528	-0.25289	0.534394	0.767895	SNX1	stable	0.114698
ENSG00000028839	0.31382	0.659325	0.845946	TBPL1	stable	0.0726574
ENSG00000029153	0.649071	0.315447	0.589471	BMAL2	stable	0.229537
ENSG00000029363	0.919522	0.0400163	0.170168	BCLAF1	stable	0.769121
ENSG00000029364	0.603662	0.194192	0.452739	SLC39A9	stable	0.344152
ENSG00000029559	4.83834	0.0100031	0.0662519	IBSP	stable	1.1788
ENSG00000029639	-0.271519	0.658972	0.845795	TFB1M	stable	0.0727348
ENSG00000029725	-0.797623	0.0409636	0.172446	RABEP1	stable	0.763346
ENSG00000029993	0.491654	0.310749	0.585175	HMGB3	stable	0.232714
ENSG00000030066	1.29942	0.00700994	0.0513175	NUP160	stable	1.28973
ENSG00000030110	0.361365	0.451979	0.706628	BAK1	stable	0.150809
ENSG00000030419	0.598058	0.404379	0.669436	IKZF2	stable	0.174291
ENSG00000030582	0.291038	0.50379	0.746395	GRN	stable	0.127031
ENSG00000031003	0.79085	0.117447	0.339836	FAM13B	stable	0.46873
ENSG00000031081	-0.620145	0.257758	0.529193	ARHGAP31	stable	0.276386
ENSG00000031691	1.67344	0.0221847	0.115341	CENPQ	stable	0.938016
ENSG00000031698	0.265	0.506711	0.747688	SARS1	stable	0.12628
ENSG00000031823	-0.337289	0.392239	0.65855	RANBP3	stable	0.181411
ENSG00000032219	1.22941	0.0120745	0.0760802	ARID4A	stable	1.11873
ENSG00000032389	0.0852315	0.857928	0.945487	EIPR1	stable	0.0243444
ENSG00000032444	-0.921095	0.0214228	0.112534	PNPLA6	stable	0.948716
ENSG00000032742	0.076389	0.875115	0.952209	IFT88	stable	0.0212676
ENSG00000033011	0.163167	0.712639	0.87519	ALG1	stable	0.0578978
ENSG00000033030	0.62454	0.148064	0.388572	ZCCHC8	stable	0.410529
ENSG00000033050	0.534425	0.166414	0.415152	ABCF2	stable	0.381793
ENSG00000033100	0.978162	0.0162212	0.0928	CHPF2	stable	1.03245
ENSG00000033170	-0.513516	0.345041	0.617981	FUT8	stable	0.209025
ENSG00000033178	1.41502	0.0107901	0.0702376	UBA6	stable	1.15343
ENSG00000033327	-0.814942	0.0586257	0.217565	GAB2	stable	0.66241
ENSG00000033800	-0.106652	0.841992	0.936925	PIAS1	stable	0.0282951
ENSG00000034152	0.0605779	0.892492	0.959173	MAP2K3	stable	0.0181031
ENSG00000034510	0.196931	0.575666	0.796058	TMSB10	stable	0.0990551
ENSG00000034533	0.579473	0.303001	0.577837	ASTE1	stable	0.238195
ENSG00000034677	0.352805	0.378313	0.647136	RNF19A	stable	0.189004
ENSG00000034693	1.35343	0.0820297	0.271525	PEX3	stable	0.56619
ENSG00000034713	-0.129444	0.785474	0.911883	GABARAPL2	stable	0.0400611
ENSG00000035115	0.486434	0.267091	0.539596	SH3YL1	stable	0.267932
ENSG00000035141	0.904746	0.0350042	0.156053	FAM136A	stable	0.806728
ENSG00000035403	0.995077	0.0455245	0.185761	VCL	stable	0.731044
ENSG00000035681	0.553777	0.169261	0.418923	NSMAF	stable	0.377866
ENSG00000035687	0.653773	0.219336	0.485263	ADSS2	stable	0.314023
ENSG00000035862	0.0149958	0.968806	0.989808	TIMP2	stable	0.00444913
ENSG00000035928	0.101833	0.806939	0.921861	RFC1	stable	0.0353346
ENSG00000036054	1.17299	0.0637998	0.230594	TBC1D23	stable	0.637153
ENSG00000036257	0.881663	0.0400966	0.170304	CUL3	stable	0.768774
ENSG00000036549	0.931331	0.0370527	0.161669	ZZZ3	stable	0.791372
ENSG00000036565	2.70376	0.0594871	0.219746	SLC18A1	stable	0.658078
ENSG00000037042	-1.02981	0.00694708	0.0510093	TUBG2	stable	1.29235
ENSG00000037241	0.966539	0.0407674	0.171876	RPL26L1	stable	0.764786
ENSG00000037280	0.339144	0.621192	0.823768	FLT4	stable	0.0841953
ENSG00000037474	0.298304	0.470895	0.721814	NSUN2	stable	0.141575
ENSG00000037637	0.392612	0.350077	0.622258	FBXO42	stable	0.206029
ENSG00000037749	0.666612	0.527192	0.762595	MFAP3	stable	0.117706
ENSG00000037757	0.960443	0.0238158	0.121109	MRI1	stable	0.916823
ENSG00000037897	0.896196	0.0794251	0.266119	METTL1	stable	0.574924
ENSG00000037965	-0.00951943	0.994461	0.997568	HOXC8	stable	0.00105768
ENSG00000038002	0.162325	0.778129	0.908061	AGA	stable	0.0418852
ENSG00000038210	1.30927	0.0688988	0.242873	PI4K2B	stable	0.614621
ENSG00000038219	0.36746	0.395678	0.661914	BOD1L1	stable	0.179198
ENSG00000038274	1.32263	0.0346701	0.154958	MAT2B	stable	0.809786
ENSG00000038358	-0.0716285	0.849397	0.940712	EDC4	stable	0.0265432
ENSG00000038427	0.359116	0.590277	0.805314	VCAN	stable	0.0940347
ENSG00000038532	-0.892658	0.052595	0.203494	CLEC16A	stable	0.691448
ENSG00000039068	-0.604204	0.549788	0.777594	CDH1	stable	0.109247
ENSG00000039123	0.747795	0.123135	0.349216	MTREX	stable	0.456906
ENSG00000039139	0.0483894	0.962942	0.988699	DNAH5	stable	0.0049359
ENSG00000039319	-0.489056	0.294819	0.569195	ZFYVE16	stable	0.244739
ENSG00000039523	-0.628551	0.100992	0.309534	RIPOR1	stable	0.509291
ENSG00000039560	0.306413	0.570169	0.792871	RAI14	stable	0.100797
ENSG00000039650	0.0321495	0.939094	0.97843	PNKP	stable	0.00947022
ENSG00000039987	2.55483	0.381551	NA	BEST2	stable	NA
ENSG00000040199	0.324536	0.519793	0.757779	PHLPP2	stable	0.120458
ENSG00000040275	1.47568	0.0105178	0.0689075	SPDL1	stable	1.16173
ENSG00000040341	0.32194	0.514979	0.753425	STAU2	stable	0.12296
ENSG00000040487	-0.206659	0.66923	0.851562	SLC66A1	stable	0.0697836
ENSG00000040531	-0.210614	0.648684	0.840158	CTNS	stable	0.0756389
ENSG00000040633	0.476388	0.302337	0.577174	PHF23	stable	0.238693
ENSG00000040731	0.123916	0.830669	0.932331	CDH10	stable	0.0304297
ENSG00000040933	0.109127	0.799097	0.918074	INPP4A	stable	0.0371221
ENSG00000041353	0.0484229	0.964781	0.989072	RAB27B	stable	0.00477202
ENSG00000041357	0.701814	0.0882939	0.284311	PSMA4	stable	0.546206
ENSG00000041515	-0.306736	0.684595	0.85995	MYO16	stable	0.0655268
ENSG00000041802	0.568328	0.171845	0.422174	LSG1	stable	0.374509
ENSG00000041880	-0.447298	0.359378	0.630417	PARP3	stable	0.200372
ENSG00000041988	-0.0303827	0.949879	0.983092	THAP3	stable	0.0074057
ENSG00000042062	0.80681	0.355584	0.627025	RIPOR3	stable	0.202715
ENSG00000042088	0.661243	0.189059	0.44571	TDP1	stable	0.350947
ENSG00000042286	-0.720075	0.179921	0.433611	AIFM2	stable	0.3629
ENSG00000042317	-0.121879	0.823009	0.928252	SPATA7	stable	0.0323339
ENSG00000042429	1.35597	0.0168931	0.0955657	MED17	stable	1.0197
ENSG00000042445	-0.472745	0.304282	0.579053	RETSAT	stable	0.237282
ENSG00000042493	-0.33353	0.470099	0.721192	CAPG	stable	0.141949
ENSG00000042753	-0.685144	0.119882	0.343887	AP2S1	stable	0.463585
ENSG00000042781	0.672741	0.640732	0.836255	USH2A	stable	0.0776614
ENSG00000042832	0.123567	0.918361	0.970438	TG	stable	0.0130321
ENSG00000042980	-0.926564	0.0568441	0.213254	ADAM28	stable	0.671103
ENSG00000043093	-0.459974	0.318209	0.592162	DCUN1D1	stable	0.227559
ENSG00000043143	-0.587387	0.224466	0.489587	JADE2	stable	0.31017
ENSG00000043355	-0.547717	0.417789	0.680987	ZIC2	stable	0.166861
ENSG00000043462	0.415869	0.424659	0.686929	LCP2	stable	0.163088
ENSG00000043514	0.27791	0.55584	0.781803	TRIT1	stable	0.106903
ENSG00000044090	-0.165622	0.730156	0.884479	CUL7	stable	0.0533123
ENSG00000044115	0.286037	0.46066	0.713958	CTNNA1	stable	0.146328
ENSG00000044446	-0.581268	0.186545	0.442654	PHKA2	stable	0.353936
ENSG00000044459	0.642051	0.341354	0.614552	CNTLN	stable	0.211442
ENSG00000044524	2.84832	0.0360936	0.159129	EPHA3	stable	0.798251
ENSG00000046604	0.651727	0.832508	NA	DSG2	stable	NA
ENSG00000046647	-0.601311	0.230937	0.497339	GEMIN8	stable	0.303348
ENSG00000046651	0.0445698	0.936383	0.977459	OFD1	stable	0.00990147
ENSG00000046653	-0.501949	0.221782	0.488069	GPM6B	stable	0.311519
ENSG00000046889	-0.278953	0.602193	0.813336	PREX2	stable	0.0897301
ENSG00000047056	-0.0180452	0.975548	0.991906	WDR37	stable	0.00352949
ENSG00000047230	0.433506	0.352661	0.624523	CTPS2	stable	0.204452
ENSG00000047249	-0.71176	0.200657	0.461093	ATP6V1H	stable	0.336211
ENSG00000047315	0.824484	0.0444303	0.182832	POLR2B	stable	0.737947
ENSG00000047346	-0.530759	0.231429	0.497677	ATOSA	stable	0.303053
ENSG00000047365	0.338923	0.423376	0.685771	ARAP2	stable	0.163821
ENSG00000047410	1.1109	0.0411726	0.173137	TPR	stable	0.76161
ENSG00000047457	1.51374	0.0774812	0.261638	CP	stable	0.582299
ENSG00000047578	-0.628706	0.241393	0.509421	KATNIP	stable	0.292923
ENSG00000047579	-0.14794	0.841636	0.936891	DTNBP1	stable	0.0283109
ENSG00000047597	-3.59469	0.0310516	0.144867	XK	stable	0.839029
ENSG00000047617	-1.65054	0.268267	0.540875	ANO2	stable	0.266903
ENSG00000047621	0.476673	0.333759	0.607948	C12orf4	stable	0.216133
ENSG00000047634	1.24737	0.0370139	0.161573	SCML1	stable	0.79163
ENSG00000047644	0.0624919	0.888272	0.957252	WWC3	stable	0.0189738
ENSG00000047648	1.28241	0.0715067	0.249013	ARHGAP6	stable	0.603777
ENSG00000047662	1.01524	0.254924	0.525727	FAM184B	stable	0.27924
ENSG00000047932	0.868536	0.0467723	0.188893	GOPC	stable	0.723785
ENSG00000048028	0.498332	0.461336	0.714479	USP28	stable	0.14601
ENSG00000048052	0.652956	0.26252	0.534245	HDAC9	stable	0.272259
ENSG00000048140	0.812406	0.0756919	0.257355	TSPAN17	stable	0.589467
ENSG00000048162	0.508044	0.29353	0.567902	NOP16	stable	0.245727
ENSG00000048342	-0.542995	0.26823	0.540875	CC2D2A	stable	0.266903
ENSG00000048392	0.41643	0.484849	0.732635	RRM2B	stable	0.135112
ENSG00000048405	0.860096	0.0920057	0.29152	ZNF800	stable	0.535332
ENSG00000048471	-0.511753	0.289995	0.564521	SNX29	stable	0.24832
ENSG00000048544	0.704415	0.142034	0.379659	MRPS10	stable	0.420606
ENSG00000048545	-0.478429	0.764611	0.900466	GUCA1A	stable	0.0455326
ENSG00000048649	0.378796	0.366746	0.636525	RSF1	stable	0.196184
ENSG00000048707	-0.486653	0.249929	0.519932	VPS13D	stable	0.284053
ENSG00000048740	0.0229848	0.959524	0.987349	CELF2	stable	0.00552935
ENSG00000048828	0.110933	0.79321	0.915215	FAM120A	stable	0.0384767
ENSG00000048991	-0.339514	0.519842	0.757779	R3HDM1	stable	0.120458
ENSG00000049130	-0.089698	0.918949	0.97055	KITLG	stable	0.012982
ENSG00000049167	1.21656	0.0580166	0.215953	ERCC8	stable	0.66564
ENSG00000049192	2.11502	0.00822781	0.0578301	ADAMTS6	stable	1.23785
ENSG00000049239	0.859074	0.0297423	0.141047	H6PD	stable	0.850635
ENSG00000049245	-0.210115	0.638595	0.834519	VAMP3	stable	0.0785639
ENSG00000049246	-0.446294	0.303912	0.578462	PER3	stable	0.237725
ENSG00000049283	-2.61977	0.0556234	0.210892	EPN3	stable	0.675941
ENSG00000049323	0.466919	0.524416	0.760574	LTBP1	stable	0.118859
ENSG00000049449	0.731104	0.0704156	0.246506	RCN1	stable	0.608173
ENSG00000049540	0.63121	0.442266	0.69986	ELN	stable	0.154989
ENSG00000049541	1.22283	0.00911575	0.0621523	RFC2	stable	1.20654
ENSG00000049618	0.701152	0.0906279	0.289109	ARID1B	stable	0.538938
ENSG00000049656	0.349789	0.367269	0.636894	CLPTM1L	stable	0.195933
ENSG00000049759	-0.96988	0.076461	0.258965	NEDD4L	stable	0.586759
ENSG00000049768	-0.230573	0.834993	0.934089	FOXP3	stable	0.0296118
ENSG00000049860	0.506564	0.196174	0.455292	HEXB	stable	0.34171
ENSG00000049883	0.655202	0.270183	0.542958	PTCD2	stable	0.265234
ENSG00000050030	-0.429175	0.585685	0.80272	NEXMIF	stable	0.0954358
ENSG00000050130	1.55501	0.0149447	0.0877909	JKAMP	stable	1.05655
ENSG00000050327	-3.69478	0.031713	0.146745	ARHGEF5	stable	0.833437
ENSG00000050344	0.750367	0.170507	0.420657	NFE2L3	stable	0.376072
ENSG00000050393	0.0145811	0.973046	0.991278	MCUR1	stable	0.00380463
ENSG00000050426	-0.185111	0.625975	0.827089	LETMD1	stable	0.0824478
ENSG00000050438	0.3	0.57057	0.793028	SLC4A8	stable	0.100711
ENSG00000050555	-0.279971	0.701986	0.869523	LAMC3	stable	0.0607189
ENSG00000050748	-0.713613	0.0883585	0.284317	MAPK9	stable	0.546197
ENSG00000050820	-0.470384	0.285344	0.559394	BCAR1	stable	0.252282
ENSG00000051009	-0.0762867	0.868805	0.949638	FHIP1B	stable	0.0224419
ENSG00000051108	0.0707003	0.886973	0.956322	HERPUD1	stable	0.0193957
ENSG00000051128	-0.391724	0.316092	0.589922	HOMER3	stable	0.229205
ENSG00000051180	2.61032	0.0110444	0.0714586	RAD51	stable	1.14595
ENSG00000051341	1.59864	0.0274234	0.133433	POLQ	stable	0.874738
ENSG00000051382	-0.15977	0.734468	0.886755	PIK3CB	stable	0.0521964
ENSG00000051523	-0.769639	0.0816324	0.270675	CYBA	stable	0.567552
ENSG00000051596	0.307094	0.57587	0.796058	THOC3	stable	0.0990551
ENSG00000051620	-0.0782942	0.85375	0.942913	HEBP2	stable	0.0255286
ENSG00000051825	0.360782	0.562141	0.787218	MPHOSPH9	stable	0.103905
ENSG00000052126	-1.13281	0.0721242	0.25047	PLEKHA5	stable	0.601245
ENSG00000052749	-0.669578	0.107879	0.322117	RRP12	stable	0.491986
ENSG00000052795	0.0975443	0.862731	0.946808	FNIP2	stable	0.0237382
ENSG00000052802	-0.582538	0.334034	0.608104	MSMO1	stable	0.216022
ENSG00000052841	0.227135	0.61406	0.819725	TTC17	stable	0.086332
ENSG00000053254	-0.485823	0.260158	0.531742	FOXN3	stable	0.274299
ENSG00000053371	0.255041	0.622488	0.824521	AKR7A2	stable	0.0837981
ENSG00000053372	0.472186	0.280041	0.553702	MRTO4	stable	0.256724
ENSG00000053438	-1.49485	0.0117956	0.0749103	NNAT	stable	1.12546
ENSG00000053501	-0.107612	0.792265	0.91486	USE1	stable	0.0386454
ENSG00000053770	0.493233	0.322731	0.596201	AP5M1	stable	0.224607
ENSG00000053900	-0.53454	0.220426	0.486392	ANAPC4	stable	0.313013
ENSG00000053918	-0.432229	0.463014	0.71577	KCNQ1	stable	0.145226
ENSG00000054116	0.175417	0.657204	0.84482	TRAPPC3	stable	0.073236
ENSG00000054118	0.841067	0.0388567	0.167031	THRAP3	stable	0.777204
ENSG00000054148	-0.161913	0.655746	0.843846	PHPT1	stable	0.0737367
ENSG00000054179	-2.15576	0.00746772	0.0538301	ENTPD2	stable	1.26897
ENSG00000054219	0.799628	0.401099	0.666785	LY75	stable	0.176014
ENSG00000054267	0.917503	0.0396094	0.16911	ARID4B	stable	0.771831
ENSG00000054277	0.107203	0.838428	0.935388	OPN3	stable	0.029008
ENSG00000054282	-0.607343	0.156269	0.400397	SDCCAG8	stable	0.39751
ENSG00000054392	-0.754548	0.506429	0.747509	HHAT	stable	0.126383
ENSG00000054523	0.154793	0.694959	0.865887	KIF1B	stable	0.0625386
ENSG00000054598	-0.106277	0.87866	0.953671	FOXC1	stable	0.0206015
ENSG00000054611	-0.929477	0.0446412	0.183205	TBC1D22A	stable	0.737063
ENSG00000054654	1.21743	0.00998174	0.0661831	SYNE2	stable	1.17925
ENSG00000054793	-0.48373	0.311385	0.585686	ATP9A	stable	0.232335
ENSG00000054803	-1.69149	0.177805	0.430555	CBLN4	stable	0.365972
ENSG00000054938	-0.876053	0.631372	0.830145	CHRDL2	stable	0.0808459
ENSG00000054965	-0.0947435	0.790439	0.914603	FAM168A	stable	0.0387675
ENSG00000054967	-0.393463	0.357909	0.629272	RELT	stable	0.201162
ENSG00000054983	0.311931	0.627157	0.82755	GALC	stable	0.082206
ENSG00000055044	0.514668	0.192868	0.451156	NOP58	stable	0.345673
ENSG00000055070	0.62397	0.106707	0.320104	SZRD1	stable	0.494709
ENSG00000055118	0.544148	0.180198	0.433843	KCNH2	stable	0.362667
ENSG00000055130	0.380464	0.315927	0.589922	CUL1	stable	0.229205
ENSG00000055147	0.901248	0.0929726	0.293191	FAM114A2	stable	0.53285
ENSG00000055208	0.373493	0.369804	0.638943	TAB2	stable	0.194538
ENSG00000055211	0.331013	0.505147	0.746897	GINM1	stable	0.126739
ENSG00000055332	0.380845	0.352631	0.624523	EIF2AK2	stable	0.204452
ENSG00000055483	0.158387	0.688284	0.862077	USP36	stable	0.0644539
ENSG00000055813	-4.74626	0.0164962	0.0939549	CCDC85A	stable	1.02708
ENSG00000055917	0.878392	0.0469502	0.189294	PUM2	stable	0.722863
ENSG00000055950	-0.749799	0.0743517	0.254674	MRPL43	stable	0.594015
ENSG00000055955	-1.00901	0.0735704	0.253316	ITIH4	stable	0.596338
ENSG00000056050	0.202652	0.670723	0.852429	HPF1	stable	0.0693419
ENSG00000056097	0.806686	0.0799595	0.267197	ZFR	stable	0.573168
ENSG00000056277	1.98329	0.0353443	0.156916	ZNF280C	stable	0.804333
ENSG00000056487	0.556914	0.30632	0.580923	PHF21B	stable	0.235882
ENSG00000056558	-0.416302	0.407752	0.672113	TRAF1	stable	0.172558
ENSG00000056586	0.851618	0.0643881	0.23194	RC3H2	stable	0.634625
ENSG00000056736	0.292257	0.638563	0.834519	IL17RB	stable	0.0785639
ENSG00000056972	-0.118226	0.820295	0.927258	TRAF3IP2	stable	0.0327996
ENSG00000057252	0.987239	0.0397698	0.169532	SOAT1	stable	0.770748
ENSG00000057294	-1.91541	0.422773	NA	PKP2	stable	NA
ENSG00000057468	1.03435	0.725319	NA	MSH4	stable	NA
ENSG00000057593	-1.26378	0.456885	NA	F7	stable	NA
ENSG00000057608	-0.101178	0.82863	0.931269	GDI2	stable	0.030925
ENSG00000057657	0.194663	0.797734	0.917108	PRDM1	stable	0.0375795
ENSG00000057663	0.263976	0.605714	0.815655	ATG5	stable	0.0884937
ENSG00000057704	-0.460754	0.447316	0.703881	TMCC3	stable	0.152501
ENSG00000057757	-0.0567007	0.889927	0.957696	PITHD1	stable	0.0187722
ENSG00000057935	-0.547334	0.166043	0.414635	MTA3	stable	0.382334
ENSG00000058056	0.399212	0.388809	0.65536	USP13	stable	0.18352
ENSG00000058063	1.6966	0.0089069	0.0610958	ATP11B	stable	1.21399
ENSG00000058085	0.0618629	0.970083	NA	LAMC2	stable	NA
ENSG00000058262	0.929401	0.0138093	0.0831743	SEC61A1	stable	1.08001
ENSG00000058272	1.11364	0.0505253	0.198596	PPP1R12A	stable	0.70203
ENSG00000058453	-0.986152	0.0459819	0.187073	CROCC	stable	0.727988
ENSG00000058600	0.452243	0.279815	0.553483	POLR3E	stable	0.256896
ENSG00000058668	0.224601	0.564547	0.788754	ATP2B4	stable	0.103059
ENSG00000058673	0.527958	0.152031	0.394786	ZC3H11A	stable	0.403638
ENSG00000058729	0.661689	0.185097	0.440705	RIOK2	stable	0.355852
ENSG00000058799	0.384616	0.374435	0.643473	YIPF1	stable	0.19147
ENSG00000059122	-0.925971	0.0130031	0.0801739	FLYWCH1	stable	1.09597
ENSG00000059145	0.0249141	0.961339	0.987934	UNKL	stable	0.005272
ENSG00000059377	-0.587001	0.268189	0.54087	TBXAS1	stable	0.266907
ENSG00000059378	0.0194227	0.97584	0.991954	PARP12	stable	0.00350855
ENSG00000059573	0.736918	0.0970951	0.301164	ALDH18A1	stable	0.521198
ENSG00000059588	0.330558	0.423917	0.686335	TARBP1	stable	0.163464
ENSG00000059691	-0.833797	0.0577982	0.215441	GATB	stable	0.666672
ENSG00000059728	0.539026	0.444407	0.701637	MXD1	stable	0.153888
ENSG00000059758	0.724756	0.20397	0.46499	CDK17	stable	0.332557
ENSG00000059769	0.491312	0.417463	0.680652	DNAJC25	stable	0.167075
ENSG00000059804	-1.38738	0.165808	0.414315	SLC2A3	stable	0.382669
ENSG00000060069	-0.220385	0.610436	0.817966	CTDP1	stable	0.087265
ENSG00000060140	-0.908767	0.714521	NA	STYK1	stable	NA
ENSG00000060237	-0.960682	0.0102061	0.067185	WNK1	stable	1.17273
ENSG00000060339	0.292359	0.479034	0.728437	CCAR1	stable	0.137608
ENSG00000060491	-1.05962	0.00909663	0.0620439	OGFR	stable	1.2073
ENSG00000060558	-0.464931	0.490828	0.736693	GNA15	stable	0.132714
ENSG00000060566	-3.86742	0.14752	NA	CREB3L3	stable	NA
ENSG00000060642	0.0395892	0.937881	0.978168	PIGV	stable	0.0095864
ENSG00000060688	0.839156	0.071764	0.249639	SNRNP40	stable	0.602688
ENSG00000060718	0.701007	0.451545	0.706287	COL11A1	stable	0.151019
ENSG00000060762	-0.0232716	0.958608	0.987042	MPC1	stable	0.00566458
ENSG00000060971	-0.494849	0.188056	0.444325	ACAA1	stable	0.352299
ENSG00000061273	-0.0485523	0.91626	0.969282	HDAC7	stable	0.0135499
ENSG00000061337	1.32391	0.0749045	0.255884	LZTS1	stable	0.591957
ENSG00000061455	-0.771139	0.4585	0.712192	PRDM6	stable	0.147403
ENSG00000061656	-0.871478	0.255358	0.526229	SPAG4	stable	0.278825
ENSG00000061676	0.640876	0.177398	0.430113	NCKAP1	stable	0.366418
ENSG00000061794	0.313871	0.475928	0.726235	MRPS35	stable	0.138923
ENSG00000061918	-1.99846	0.0136167	0.0825055	GUCY1B1	stable	1.08352
ENSG00000061936	-0.673838	0.157275	0.402014	SFSWAP	stable	0.395759
ENSG00000061938	-0.859234	0.0855516	0.279391	TNK2	stable	0.553787
ENSG00000061987	0.492188	0.359778	0.631004	MON2	stable	0.199968
ENSG00000062038	-2.15088	0.0529455	0.204276	CDH3	stable	0.689783
ENSG00000062194	0.315243	0.428029	0.688864	GPBP1	stable	0.161866
ENSG00000062282	-1.60439	0.14424	0.382706	DGAT2	stable	0.417135
ENSG00000062370	1.29782	0.0575414	0.214741	ZNF112	stable	0.668085
ENSG00000062485	0.199908	0.608321	0.816624	CS	stable	0.0879776
ENSG00000062524	-2.46495	0.0253897	0.126215	LTK	stable	0.898889
ENSG00000062582	0.605432	0.210852	0.474559	MRPS24	stable	0.32371
ENSG00000062598	-0.258777	0.482809	0.731415	ELMO2	stable	0.135836
ENSG00000062650	0.398282	0.429295	0.689673	WAPL	stable	0.161357
ENSG00000062725	0.764806	0.146633	0.386459	APPBP2	stable	0.412896
ENSG00000062822	0.794017	0.0977302	0.302549	POLD1	stable	0.519204
ENSG00000063015	0.49713	0.232987	0.499355	SEZ6	stable	0.301591
ENSG00000063046	-0.247297	0.492855	0.738324	EIF4B	stable	0.131753
ENSG00000063127	-0.816195	0.408709	0.67266	SLC6A16	stable	0.172205
ENSG00000063169	-0.1559	0.735843	0.887573	BICRA	stable	0.0517959
ENSG00000063176	0.0548985	0.923421	0.972387	SPHK2	stable	0.0121606
ENSG00000063177	-0.291077	0.443732	0.700883	RPL18	stable	0.154354
ENSG00000063241	-0.250599	0.62683	0.827382	ISOC2	stable	0.0822937
ENSG00000063244	0.507414	0.171809	0.42214	U2AF2	stable	0.374543
ENSG00000063245	-0.86249	0.0286227	0.137412	EPN1	stable	0.861974
ENSG00000063322	-0.569218	0.122405	0.347913	MED29	stable	0.458529
ENSG00000063438	0.284476	0.718532	0.877958	AHRR	stable	0.0565263
ENSG00000063587	0.126952	0.778787	0.908278	ZNF275	stable	0.0417813
ENSG00000063587	0.126952	0.778787	0.908278	LOC105373378	stable	0.0417813
ENSG00000063601	0.376987	0.364812	0.635154	MTMR1	stable	0.197121
ENSG00000063660	0.740079	0.0796446	0.266515	GPC1	stable	0.574279
ENSG00000063761	-0.599438	0.185198	0.440705	ADCK1	stable	0.355852
ENSG00000063978	0.624547	0.153185	0.396196	RNF4	stable	0.402089
ENSG00000064012	1.69118	0.0114211	0.0730615	CASP8	stable	1.13631
ENSG00000064102	0.221171	0.630605	0.829555	INTS13	stable	0.0811548
ENSG00000064115	0.580073	0.211245	0.474944	TM7SF3	stable	0.323358
ENSG00000064199	-0.0308331	0.956855	0.98613	SPA17	stable	0.0060658
ENSG00000064201	0.167835	0.852005	0.941725	TSPAN32	stable	0.0260758
ENSG00000064205	-1.68592	0.519597	NA	CCN5	stable	NA
ENSG00000064218	0.168571	0.930992	0.975382	DMRT3	stable	0.0108255
ENSG00000064225	-0.268751	0.559447	0.784986	ST3GAL6	stable	0.105138
ENSG00000064270	-3.00748	0.0439736	0.181587	ATP2C2	stable	0.740916
ENSG00000064300	-0.862173	0.142876	0.380583	NGFR	stable	0.41955
ENSG00000064309	-0.442087	0.554003	0.780808	CDON	stable	0.107456
ENSG00000064419	0.98342	0.0162429	0.0928963	TNPO3	stable	1.032
ENSG00000064490	-0.0372482	0.92748	0.973869	RFXANK	stable	0.0114994
ENSG00000064545	0.482467	0.256545	0.527666	TMEM161A	stable	0.277641
ENSG00000064547	-0.100665	0.849414	0.940712	LPAR2	stable	0.0265432
ENSG00000064601	-0.134992	0.703093	0.870083	CTSA	stable	0.0604395
ENSG00000064607	0.188206	0.637637	0.834121	SUGP2	stable	0.0787707
ENSG00000064651	0.0421415	0.954947	0.985203	SLC12A2	stable	0.0064743
ENSG00000064652	0.373572	0.500264	0.743871	SNX24	stable	0.128502
ENSG00000064655	-0.279821	0.656386	0.84412	EYA2	stable	0.0735957
ENSG00000064666	0.165064	0.791928	0.914854	CNN2	stable	0.0386484
ENSG00000064687	-0.951797	0.0381348	0.16501	ABCA7	stable	0.782489
ENSG00000064692	0.264057	0.722921	0.880346	SNCAIP	stable	0.0553467
ENSG00000064726	0.145833	0.735968	0.887573	BTBD1	stable	0.0517959
ENSG00000064763	0.862409	0.211973	0.475749	FAR2	stable	0.322623
ENSG00000064886	-1.12248	0.0609893	0.223539	CHI3L2	stable	0.650648
ENSG00000064932	1.09416	0.00990959	0.0658634	SBNO2	stable	1.18136
ENSG00000064933	0.0104368	0.983039	0.99434	PMS1	stable	0.00246489
ENSG00000064961	0.255461	0.558138	0.78367	HMG20B	stable	0.105867
ENSG00000064989	0.869485	0.46692	0.718694	CALCRL	stable	0.143456
ENSG00000064995	0.185166	0.662047	0.847196	TAF11	stable	0.0720161
ENSG00000064999	-0.537027	0.204836	0.466264	ANKS1A	stable	0.331368
ENSG00000065000	0.360009	0.339164	0.612523	AP3D1	stable	0.212877
ENSG00000065029	-0.302915	0.50469	0.746554	ZNF76	stable	0.126939
ENSG00000065057	-0.41905	0.373902	0.643073	NTHL1	stable	0.19174
ENSG00000065060	0.99828	0.035643	0.157812	BLTP3A	stable	0.80186
ENSG00000065150	0.804818	0.0345304	0.154547	IPO5	stable	0.81094
ENSG00000065154	-0.37225	0.510047	0.750197	OAT	stable	0.124825
ENSG00000065268	-0.249657	0.546018	0.775175	WDR18	stable	0.1106
ENSG00000065325	-4.57303	0.00700251	0.051302	GLP2R	stable	1.28987
ENSG00000065328	3.01034	0.0107863	0.0702366	MCM10	stable	1.15344
ENSG00000065357	-1.05356	0.0121245	0.0762452	DGKA	stable	1.11779
ENSG00000065371	0.918999	0.816876	NA	ROPN1	stable	NA
ENSG00000065413	-0.960745	0.270308	0.54304	ANKRD44	stable	0.265168
ENSG00000065427	0.519938	0.160819	0.407282	KARS1	stable	0.390105
ENSG00000065457	0.224616	0.720278	0.878837	ADAT1	stable	0.0560917
ENSG00000065485	0.0218782	0.97154	0.990666	PDIA5	stable	0.0040726
ENSG00000065491	0.0709129	0.873989	0.951682	TBC1D22B	stable	0.0215081
ENSG00000065518	-0.270608	0.495809	0.741079	NDUFB4	stable	0.130135
ENSG00000065526	0.0176412	0.966919	0.989425	SPEN	stable	0.00461697
ENSG00000065548	1.04307	0.0464585	0.188016	ZC3H15	stable	0.725805
ENSG00000065559	0.386726	0.480605	0.729847	MAP2K4	stable	0.136768
ENSG00000065600	0.36676	0.591964	0.806531	PACC1	stable	0.0933787
ENSG00000065613	0.116664	0.823899	0.928568	SLK	stable	0.0321863
ENSG00000065615	0.49124	0.462733	0.715557	CYB5R4	stable	0.145356
ENSG00000065618	-4.36246	0.0531123	NA	COL17A1	stable	NA
ENSG00000065665	-0.826092	0.103936	0.315171	SEC61A2	stable	0.501453
ENSG00000065675	-0.525795	0.623152	0.82482	PRKCQ	stable	0.0836411
ENSG00000065717	1.07037	0.0112102	0.0723099	TLE2	stable	1.1408
ENSG00000065802	-0.48576	0.286769	0.560846	ASB1	stable	0.251156
ENSG00000065833	-2.46706	0.0095437	0.0640725	ME1	stable	1.19333
ENSG00000065882	-0.510419	0.223759	0.48922	TBC1D1	stable	0.310496
ENSG00000065883	0.907947	0.0212129	0.112021	CDK13	stable	0.9507
ENSG00000065911	0.348214	0.471529	0.722481	MTHFD2	stable	0.141174
ENSG00000065923	0.262862	0.535194	0.768576	SLC9A7	stable	0.114313
ENSG00000065970	0.0424258	0.920972	0.9714	FOXJ2	stable	0.0126018
ENSG00000066027	-0.141291	0.769974	0.903226	PPP2R5A	stable	0.0442037
ENSG00000066032	-1.29593	0.0234161	0.119812	CTNNA2	stable	0.921501
ENSG00000066044	1.06277	0.00992707	0.0659251	ELAVL1	stable	1.18095
ENSG00000066084	0.141734	0.750638	0.89443	DIP2B	stable	0.0484539
ENSG00000066117	0.666298	0.0798928	0.267163	SMARCD1	stable	0.573224
ENSG00000066135	0.539805	0.178908	0.432251	KDM4A	stable	0.364264
ENSG00000066136	-0.112791	0.790757	0.914603	NFYC	stable	0.0387675
ENSG00000066185	-0.750311	0.282609	0.556781	ZMYND12	stable	0.254316
ENSG00000066230	0.991388	0.686045	NA	SLC9A3	stable	NA
ENSG00000066294	0.215811	0.706807	0.871991	CD84	stable	0.0594882
ENSG00000066322	-0.983414	0.069251	0.243561	ELOVL1	stable	0.613393
ENSG00000066336	-1.05873	0.0160768	0.0922202	SPI1	stable	1.03517
ENSG00000066379	0.756443	0.095256	0.297326	POLR1H	stable	0.526767
ENSG00000066382	0.483799	0.491344	0.737092	MPPED2	stable	0.132478
ENSG00000066405	1.74923	0.496837	NA	CLDN18	stable	NA
ENSG00000066427	-0.359321	0.397798	0.663617	ATXN3	stable	0.178083
ENSG00000066455	0.611537	0.168978	0.41833	GOLGA5	stable	0.378481
ENSG00000066557	1.71989	0.0100612	0.0665452	LRRC40	stable	1.17688
ENSG00000066583	0.88498	0.154175	0.397411	ISOC1	stable	0.40076
ENSG00000066629	0.468237	0.32631	0.60011	EML1	stable	0.221769
ENSG00000066651	0.500667	0.363119	0.63397	TRMT11	stable	0.197931
ENSG00000066654	1.10078	0.0165679	0.094298	THUMPD1	stable	1.0255
ENSG00000066697	0.418994	0.419477	0.682297	MSANTD3	stable	0.166026
ENSG00000066735	0.644063	0.582536	0.800877	KIF26A	stable	0.096434
ENSG00000066739	0.588174	0.137671	0.372719	ATG2B	stable	0.428618
ENSG00000066777	1.32496	0.00992959	0.0659251	ARFGEF1	stable	1.18095
ENSG00000066827	0.077587	0.91435	0.968643	ZFAT	stable	0.0138361
ENSG00000066855	0.913655	0.274786	0.548495	MTFR1	stable	0.260827
ENSG00000066923	-0.404411	0.467958	0.719374	STAG3	stable	0.143045
ENSG00000066926	0.0870841	0.871182	0.950829	FECH	stable	0.0218974
ENSG00000066933	-0.0394138	0.934222	0.976648	MYO9A	stable	0.0102619
ENSG00000067048	1.38928	0.717125	0.876972	DDX3Y	stable	0.0570145
ENSG00000067064	-1.35421	0.013742	0.0828987	IDI1	stable	1.08145
ENSG00000067066	0.0997834	0.819173	0.926639	SP100	stable	0.0330895
ENSG00000067082	0.391613	0.509738	0.749858	KLF6	stable	0.125021
ENSG00000067113	-0.981013	0.0416686	0.174689	PLPP1	stable	0.757734
ENSG00000067167	1.05507	0.0375649	0.163281	TRAM1	stable	0.787063
ENSG00000067177	-0.35472	0.449966	0.705464	PHKA1	stable	0.151525
ENSG00000067182	0.668769	0.126921	0.35616	TNFRSF1A	stable	0.448355
ENSG00000067208	0.437841	0.407708	0.672113	EVI5	stable	0.172558
ENSG00000067225	-0.43174	0.239713	0.507894	PKM	stable	0.294227
ENSG00000067248	0.809431	0.118949	0.342356	DHX29	stable	0.465522
ENSG00000067334	0.566105	0.152922	0.395823	DNTTIP2	stable	0.402499
ENSG00000067365	-0.0665661	0.889004	0.957447	METTL22	stable	0.0188853
ENSG00000067369	0.731063	0.054967	0.209459	TP53BP1	stable	0.678902
ENSG00000067445	0.156298	0.73974	0.889599	TRO	stable	0.0508056
ENSG00000067533	1.59833	0.00778751	0.0554507	RRP15	stable	1.25609
ENSG00000067560	-0.274893	0.521875	0.758602	RHOA	stable	0.119986
ENSG00000067596	0.545758	0.202957	0.463887	DHX8	stable	0.333587
ENSG00000067601	0.114929	0.895571	0.960312	PMS2P2	stable	0.0175875
ENSG00000067601	0.114929	0.895571	0.960312	PMS2P4	stable	0.0175875
ENSG00000067646	2.66782	0.0933712	0.293871	ZFY	stable	0.531844
ENSG00000067704	0.90637	0.0745774	0.255096	IARS2	stable	0.593296
ENSG00000067829	-0.752789	0.0915832	0.290808	IDH3G	stable	0.536393
ENSG00000067900	1.22312	0.0219363	0.114545	ROCK1	stable	0.941025
ENSG00000067992	0.0257378	0.974233	0.991695	PDK3	stable	0.00362186
ENSG00000068001	0.0926008	0.843502	0.937939	HYAL2	stable	0.0278254
ENSG00000068024	-0.166434	0.711913	0.874704	HDAC4	stable	0.058139
ENSG00000068028	-0.0422249	0.927476	0.973869	RASSF1	stable	0.0114994
ENSG00000068078	-1.94763	0.0188599	0.103061	FGFR3	stable	0.986907
ENSG00000068079	-0.430985	0.382795	0.650528	IFI35	stable	0.186734
ENSG00000068097	0.537194	0.232423	0.498829	HEATR6	stable	0.302048
ENSG00000068120	-0.250402	0.520591	0.758149	COASY	stable	0.120246
ENSG00000068137	-0.457281	0.379786	0.648113	PLEKHH3	stable	0.188349
ENSG00000068305	0.332779	0.436738	0.695288	MEF2A	stable	0.157835
ENSG00000068308	-0.456209	0.219811	0.485701	OTUD5	stable	0.313631
ENSG00000068323	-0.255998	0.520942	0.758275	TFE3	stable	0.120173
ENSG00000068354	-0.350087	0.468064	0.719374	TBC1D25	stable	0.143045
ENSG00000068366	0.0830445	0.904364	0.964268	ACSL4	stable	0.0158023
ENSG00000068383	-0.929103	0.0999145	0.307083	INPP5A	stable	0.512744
ENSG00000068394	-0.309686	0.488648	0.73551	GPKOW	stable	0.133411
ENSG00000068400	0.077886	0.843247	0.937842	GRIPAP1	stable	0.0278704
ENSG00000068438	0.299736	0.490621	0.736693	FTSJ1	stable	0.132714
ENSG00000068489	1.12122	0.13194	0.363329	PRR11	stable	0.4397
ENSG00000068615	-0.875316	0.272792	0.545923	REEP1	stable	0.262868
ENSG00000068654	0.358844	0.375754	0.644532	POLR1A	stable	0.190756
ENSG00000068724	-0.494774	0.249362	0.5193	TTC7A	stable	0.284582
ENSG00000068745	0.443833	0.297199	0.571614	IP6K2	stable	0.242897
ENSG00000068784	1.01454	0.0800432	0.267384	SRBD1	stable	0.572864
ENSG00000068796	-0.101874	0.860332	0.945986	KIF2A	stable	0.0241151
ENSG00000068831	-1.25956	0.0556022	0.210853	RASGRP2	stable	0.67602
ENSG00000068878	0.0436714	0.912493	0.967901	PSME4	stable	0.0141693
ENSG00000068885	0.867951	0.0254023	0.126229	IFT80	stable	0.898839
ENSG00000068903	-1.16222	0.0102748	0.067568	SIRT2	stable	1.17026
ENSG00000068912	0.441294	0.374755	0.643702	ERLEC1	stable	0.191315
ENSG00000068971	-0.827752	0.0487405	0.194035	PPP2R5B	stable	0.712119
ENSG00000069020	-0.367257	0.401335	0.667069	MAST4	stable	0.175829
ENSG00000069122	-0.0324063	0.954984	0.985203	ADGRF5	stable	0.0064743
ENSG00000069188	-1.36696	0.0406616	0.171682	SDK2	stable	0.765274
ENSG00000069248	0.509909	0.239846	0.508018	NUP133	stable	0.294121
ENSG00000069275	-0.469658	0.199698	0.459896	NUCKS1	stable	0.33734
ENSG00000069329	0.437854	0.352846	0.624644	VPS35	stable	0.204367
ENSG00000069345	0.52828	0.281178	0.555152	DNAJA2	stable	0.255588
ENSG00000069399	0.243101	0.679287	0.856988	BCL3	stable	0.0670251
ENSG00000069431	-1.00397	0.19985	0.459896	ABCC9	stable	0.33734
ENSG00000069482	-2.79283	0.127167	0.356371	GAL	stable	0.448098
ENSG00000069493	0.149657	0.813493	0.924384	CLEC2D	stable	0.0341477
ENSG00000069509	0.333311	0.589919	0.805145	FUNDC1	stable	0.094126
ENSG00000069535	-0.612725	0.142357	0.380013	MAOB	stable	0.420202
ENSG00000069667	0.408306	0.484098	0.732266	RORA	stable	0.135331
ENSG00000069702	-0.279948	0.680044	0.857388	TGFBR3	stable	0.0668227
ENSG00000069849	0.510962	0.256813	0.527981	ATP1B3	stable	0.277382
ENSG00000069869	0.724526	0.296458	0.570971	NEDD4	stable	0.243386
ENSG00000069943	-0.0390618	0.94487	0.981231	PIGB	stable	0.00822888
ENSG00000069956	0.67495	0.222983	0.48851	MAPK6	stable	0.311127
ENSG00000069974	0.330786	0.655684	0.843823	RAB27A	stable	0.0737486
ENSG00000069998	0.894907	0.050004	0.197353	HDHD5	stable	0.704756
ENSG00000070010	0.274861	0.518902	0.756945	UFD1	stable	0.120936
ENSG00000070018	0.59716	0.250943	0.521202	LRP6	stable	0.282994
ENSG00000070047	-0.0826829	0.839541	0.935939	PHRF1	stable	0.0287525
ENSG00000070061	0.726538	0.0831006	0.273941	ELP1	stable	0.562344
ENSG00000070081	0.809255	0.0907626	0.289395	NUCB2	stable	0.538509
ENSG00000070087	-0.0863134	0.881221	0.954167	PFN2	stable	0.0203755
ENSG00000070159	-1.69323	0.0740579	0.254313	PTPN3	stable	0.594632
ENSG00000070182	-2.33051	0.0468415	0.189054	SPTB	stable	0.723415
ENSG00000070190	0.652396	0.593984	0.807513	DAPP1	stable	0.0928505
ENSG00000070214	-1.04801	0.0587113	0.217841	SLC44A1	stable	0.66186
ENSG00000070269	0.247524	0.601914	0.813131	TMEM260	stable	0.0898397
ENSG00000070366	-0.400498	0.324828	0.598412	SMG6	stable	0.223
ENSG00000070367	0.510987	0.222481	0.488395	EXOC5	stable	0.311229
ENSG00000070371	-0.888317	0.124306	0.351425	CLTCL1	stable	0.454167
ENSG00000070388	-2.17535	0.0171793	0.0967971	FGF22	stable	1.01414
ENSG00000070413	-0.207563	0.585739	0.80272	DGCR2	stable	0.0954358
ENSG00000070423	-0.324073	0.407879	0.672113	RNF126	stable	0.172558
ENSG00000070444	-0.0403247	0.932182	0.975711	MNT	stable	0.0106786
ENSG00000070476	0.568288	0.255404	0.52623	ZXDC	stable	0.278825
ENSG00000070495	-0.19507	0.675348	0.854697	JMJD6	stable	0.0681877
ENSG00000070501	-0.5348	0.246383	0.5159	POLB	stable	0.287434
ENSG00000070526	-1.80683	0.080447	0.268268	ST6GALNAC1	stable	0.571431
ENSG00000070540	-0.422846	0.441954	0.699546	WIPI1	stable	0.155184
ENSG00000070601	-1.11968	0.258952	0.530683	FRMPD1	stable	0.275165
ENSG00000070610	0.0518188	0.886007	0.956012	GBA2	stable	0.0195368
ENSG00000070614	-0.100237	0.814049	0.924447	NDST1	stable	0.0341179
ENSG00000070669	0.253241	0.57088	0.793087	ASNS	stable	0.100679
ENSG00000070718	-0.613678	0.206156	0.46787	AP3M2	stable	0.329875
ENSG00000070729	-2.58895	0.15045	0.392323	CNGB1	stable	0.406356
ENSG00000070756	0.700296	0.0688843	0.242866	PABPC1	stable	0.614633
ENSG00000070761	0.496267	0.287916	0.56229	CFAP20	stable	0.250039
ENSG00000070770	0.381778	0.328286	0.602101	CSNK2A2	stable	0.22033
ENSG00000070778	0.248439	0.643043	0.837289	PTPN21	stable	0.0771248
ENSG00000070785	0.498489	0.343491	0.616353	EIF2B3	stable	0.210171
ENSG00000070814	-0.449816	0.28562	0.559394	TCOF1	stable	0.252282
ENSG00000070831	0.781969	0.059657	0.22012	CDC42	stable	0.657341
ENSG00000070882	0.796391	0.25308	0.523589	OSBPL3	stable	0.281009
ENSG00000070886	-2.48519	0.0655021	0.234718	EPHA8	stable	0.629454
ENSG00000070915	2.87461	0.282226	NA	SLC12A3	stable	NA
ENSG00000070950	0.502045	0.338738	0.611984	RAD18	stable	0.21326
ENSG00000070961	0.412164	0.335121	0.608913	ATP2B1	stable	0.215444
ENSG00000070985	0.903691	0.723452	NA	TRPM5	stable	NA
ENSG00000071051	0.226577	0.617318	0.82128	NCK2	stable	0.0855087
ENSG00000071054	-0.964135	0.00718668	0.0523725	MAP4K4	stable	1.2809
ENSG00000071073	0.544094	0.228802	0.494954	MGAT4A	stable	0.305435
ENSG00000071082	-0.33435	0.358246	0.629272	RPL31	stable	0.201162
ENSG00000071127	0.0125474	0.974111	0.991695	WDR1	stable	0.00362186
ENSG00000071189	1.18491	0.0188348	0.103011	SNX13	stable	0.987115
ENSG00000071205	-0.821692	0.240778	0.508714	ARHGAP10	stable	0.293526
ENSG00000071242	0.318859	0.541519	0.772641	RPS6KA2	stable	0.112022
ENSG00000071243	1.04186	0.0399416	0.169964	ING3	stable	0.769644
ENSG00000071246	-0.255621	0.581502	0.799836	VASH1	stable	0.096999
ENSG00000071282	0.363623	0.523165	0.759379	LMCD1	stable	0.119541
ENSG00000071462	1.04107	0.014024	0.0842049	BUD23	stable	1.07466
ENSG00000071537	0.794374	0.138613	0.374166	SEL1L	stable	0.426936
ENSG00000071553	-0.0577337	0.891896	0.958779	ATP6AP1	stable	0.0182813
ENSG00000071626	-0.172427	0.642572	0.837112	DAZAP1	stable	0.0772167
ENSG00000071655	-0.0560913	0.876595	0.953066	MBD3	stable	0.0208772
ENSG00000071859	-0.839756	0.0532334	0.204894	FAM50A	stable	0.68847
ENSG00000071889	-0.755031	0.0519242	0.201912	FAM3A	stable	0.694837
ENSG00000071894	0.414186	0.315164	0.589286	CPSF1	stable	0.229674
ENSG00000071909	-2.76753	0.256287	NA	MYO3B	stable	NA
ENSG00000071967	0.251525	0.644535	0.838075	CYBRD1	stable	0.076717
ENSG00000071994	0.772106	0.0571395	0.213682	PDCD2	stable	0.670232
ENSG00000072042	0.371088	0.383531	0.651232	RDH11	stable	0.186264
ENSG00000072062	-0.322517	0.443745	0.700883	PRKACA	stable	0.154354
ENSG00000072071	-1.16132	0.0108658	0.0706112	ADGRL1	stable	1.15113
ENSG00000072110	0.623228	0.183863	0.439308	ACTN1	stable	0.35723
ENSG00000072121	0.402364	0.315258	0.589365	ZFYVE26	stable	0.229616
ENSG00000072133	-4.23049	0.00963871	0.0645529	RPS6KA6	stable	1.19008
ENSG00000072134	0.0057288	0.989695	0.996834	EPN2	stable	0.00137712
ENSG00000072135	-0.537658	0.157573	0.402347	PTPN18	stable	0.395399
ENSG00000072182	0.828084	0.210105	0.473569	ASIC4	stable	0.324617
ENSG00000072195	0.144715	0.758584	0.897901	SPEG	stable	0.0467715
ENSG00000072201	1.1175	0.222753	0.48844	LNX1	stable	0.311189
ENSG00000072210	0.261337	0.520946	0.758275	ALDH3A2	stable	0.120173
ENSG00000072274	1.02718	0.0413246	0.173652	TFRC	stable	0.76032
ENSG00000072364	1.53004	0.00861292	0.0596742	AFF4	stable	1.22421
ENSG00000072401	0.383258	0.661753	0.847108	UBE2D1	stable	0.0720615
ENSG00000072415	0.392757	0.45292	0.707775	PALS1	stable	0.150105
ENSG00000072422	0.0134799	0.980157	0.993616	RHOBTB1	stable	0.00278145
ENSG00000072501	0.437555	0.310175	0.584379	SMC1A	stable	0.233306
ENSG00000072506	0.377235	0.343029	0.616039	HSD17B10	stable	0.210392
ENSG00000072518	-0.308778	0.441883	0.699546	MARK2	stable	0.155184
ENSG00000072609	0.136076	0.743462	0.891087	CHFR	stable	0.0500798
ENSG00000072657	-5.21964	0.0282448	0.136191	TRHDE	stable	0.86585
ENSG00000072682	-0.6991	0.284665	0.558927	P4HA2	stable	0.252645
ENSG00000072736	0.505536	0.296148	0.570676	NFATC3	stable	0.243611
ENSG00000072756	0.942514	0.123166	0.34925	TRNT1	stable	0.456864
ENSG00000072778	-0.468805	0.229655	0.49602	ACADVL	stable	0.304501
ENSG00000072786	0.268738	0.599628	0.811674	STK10	stable	0.0906183
ENSG00000072803	0.121163	0.794158	0.915674	FBXW11	stable	0.0382589
ENSG00000072818	-0.907878	0.0980443	0.303364	ACAP1	stable	0.518037
ENSG00000072832	-0.00685145	0.985829	0.995268	CRMP1	stable	0.00206017
ENSG00000072840	1.28954	0.110429	0.326441	EVC	stable	0.486195
ENSG00000072849	0.680137	0.133784	0.366314	DERL2	stable	0.436147
ENSG00000072864	-0.054807	0.91339	0.968159	NDE1	stable	0.0140533
ENSG00000072958	0.129644	0.730169	0.884479	AP1M1	stable	0.0533123
ENSG00000073008	0.200959	0.735982	0.887573	PVR	stable	0.0517959
ENSG00000073050	-0.0819601	0.84692	0.940009	XRCC1	stable	0.0268681
ENSG00000073060	-0.590706	0.202554	0.463297	SCARB1	stable	0.33414
ENSG00000073146	-0.899809	0.413896	0.676934	MOV10L1	stable	0.169454
ENSG00000073169	-0.54658	0.218591	0.484117	SELENOO	stable	0.31505
ENSG00000073282	-0.664058	0.610128	0.817742	TP63	stable	0.0873836
ENSG00000073331	-0.748981	0.120424	0.345031	ALPK1	stable	0.462141
ENSG00000073417	-0.377369	0.387002	0.654023	PDE8A	stable	0.184407
ENSG00000073464	-1.57935	0.0137489	0.0828987	CLCN4	stable	1.08145
ENSG00000073536	0.700753	0.142879	0.380583	NLE1	stable	0.41955
ENSG00000073578	-0.331686	0.455676	0.709779	SDHA	stable	0.148877
ENSG00000073584	0.704292	0.0734244	0.252988	SMARCE1	stable	0.5969
ENSG00000073605	-0.652456	0.228799	0.494954	GSDMB	stable	0.305435
ENSG00000073614	0.618346	0.15323	0.396247	KDM5A	stable	0.402034
ENSG00000073711	-0.916016	0.237445	0.505033	PPP2R3A	stable	0.29668
ENSG00000073712	0.599141	0.126429	0.355263	FERMT2	stable	0.44945
ENSG00000073754	-0.782528	0.744742	NA	CD5L	stable	NA
ENSG00000073756	0.127662	0.92805	0.974006	PTGS2	stable	0.0114381
ENSG00000073803	-0.0491645	0.917903	0.970274	MAP3K13	stable	0.0131054
ENSG00000073849	-0.81826	0.130292	0.360843	ST6GAL1	stable	0.442682
ENSG00000073861	0.0240063	0.991425	NA	TBX21	stable	NA
ENSG00000073910	-0.453989	0.31287	0.587183	FRY	stable	0.231226
ENSG00000073921	0.280305	0.530324	0.764845	PICALM	stable	0.116427
ENSG00000073969	-0.264027	0.654734	0.843108	NSF	stable	0.074117
ENSG00000074047	0.641676	0.422514	0.685384	GLI2	stable	0.164066
ENSG00000074054	0.918094	0.0293825	0.139892	CLASP1	stable	0.854208
ENSG00000074071	0.199594	0.642605	0.837112	MRPS34	stable	0.0772167
ENSG00000074201	0.24091	0.5212	0.758345	CLNS1A	stable	0.120133
ENSG00000074219	1.40064	0.0202032	0.108016	TEAD2	stable	0.966511
ENSG00000074266	0.706751	0.227719	0.493887	EED	stable	0.306372
ENSG00000074276	-1.83244	0.0425169	0.177051	CDHR2	stable	0.751901
ENSG00000074319	0.187263	0.652315	0.841342	TSG101	stable	0.0750276
ENSG00000074356	0.184402	0.654648	0.843053	NCBP3	stable	0.0741451
ENSG00000074370	-1.5366	0.0273938	0.133322	ATP2A3	stable	0.875097
ENSG00000074527	-1.84209	0.0881412	0.284311	NTN4	stable	0.546207
ENSG00000074582	0.450806	0.287833	0.562244	BCS1L	stable	0.250075
ENSG00000074590	-0.606086	0.330616	0.60468	NUAK1	stable	0.218474
ENSG00000074603	0.0586089	0.889559	0.95756	DPP8	stable	0.0188338
ENSG00000074621	-0.353458	0.590432	0.805364	SLC24A1	stable	0.0940079
ENSG00000074657	0.678472	0.111706	0.329111	ZNF532	stable	0.482658
ENSG00000074660	-0.242056	0.655593	0.843819	SCARF1	stable	0.0737507
ENSG00000074696	0.285289	0.641235	0.836647	HACD3	stable	0.077458
ENSG00000074755	-0.143074	0.713856	0.875343	ZZEF1	stable	0.0578219
ENSG00000074800	0.671761	0.139672	0.3755	ENO1	stable	0.42539
ENSG00000074803	3.46286	0.130182	NA	SLC12A1	stable	NA
ENSG00000074842	0.959438	0.051975	0.202008	MYDGF	stable	0.694631
ENSG00000074855	-0.469786	0.373287	0.642549	ANO8	stable	0.192094
ENSG00000074935	1.19241	0.0326249	0.149315	TUBE1	stable	0.825897
ENSG00000074964	-0.121422	0.860412	0.945986	ARHGEF10L	stable	0.0241151
ENSG00000075043	0.24492	0.553015	0.780135	KCNQ2	stable	0.10783
ENSG00000075073	1.08341	0.607436	NA	TACR2	stable	NA
ENSG00000075089	0.68343	0.274822	0.548495	ACTR6	stable	0.260827
ENSG00000075131	0.771545	0.209473	0.472836	TIPIN	stable	0.325289
ENSG00000075151	0.647132	0.148665	0.389384	EIF4G3	stable	0.409622
ENSG00000075188	1.17605	0.0441123	0.182003	NUP37	stable	0.73992
ENSG00000075213	0.9116	0.223188	0.488759	SEMA3A	stable	0.310906
ENSG00000075223	-3.21248	0.0199521	0.107272	SEMA3C	stable	0.969513
ENSG00000075234	0.488795	0.290204	0.564545	TTC38	stable	0.248302
ENSG00000075239	-0.20321	0.634932	0.832633	ACAT1	stable	0.0795464
ENSG00000075240	0.0882297	0.840756	0.936398	GRAMD4	stable	0.0285396
ENSG00000075292	-0.0524818	0.891802	0.958779	ZNF638	stable	0.0182813
ENSG00000075303	1.11617	0.0526484	0.203578	SLC25A40	stable	0.691269
ENSG00000075336	0.298423	0.519624	0.757633	TIMM21	stable	0.120541
ENSG00000075340	-0.284997	0.563168	0.788084	ADD2	stable	0.103428
ENSG00000075391	0.44346	0.384414	0.651503	RASAL2	stable	0.186084
ENSG00000075399	-0.540219	0.226133	0.491469	VPS9D1	stable	0.308504
ENSG00000075407	-0.43873	0.333727	0.607946	ZNF37A	stable	0.216135
ENSG00000075413	-0.110567	0.786831	0.912633	MARK3	stable	0.0397038
ENSG00000075415	0.304153	0.440395	0.698793	SLC25A3	stable	0.155651
ENSG00000075426	0.527147	0.484384	0.73241	FOSL2	stable	0.135245
ENSG00000075429	1.40084	0.628322	NA	CACNG5	stable	NA
ENSG00000075461	1.17955	0.0216858	0.113601	CACNG4	stable	0.944617
ENSG00000075539	-0.108969	0.847358	0.940072	FRYL	stable	0.0268389
ENSG00000075618	-0.329762	0.401116	0.666785	FSCN1	stable	0.176014
ENSG00000075624	-0.0952616	0.782476	0.910261	ACTB	stable	0.0408341
ENSG00000075643	0.226206	0.880247	0.953968	MOCOS	stable	0.0204664
ENSG00000075651	-1.40171	0.0114199	0.0730615	PLD1	stable	1.13631
ENSG00000075711	0.160575	0.714445	0.87558	DLG1	stable	0.0577042
ENSG00000075785	-0.387073	0.274362	0.548009	RAB7A	stable	0.261212
ENSG00000075790	0.414593	0.345499	0.618056	BCAP29	stable	0.208972
ENSG00000075826	-0.889981	0.0485879	0.193598	SEC31B	stable	0.7131
ENSG00000075856	0.571284	0.147307	0.387482	SART3	stable	0.411748
ENSG00000075884	0.516789	0.428022	0.688864	ARHGAP15	stable	0.161866
ENSG00000075891	-3.48949	0.168006	NA	PAX2	stable	NA
ENSG00000075914	0.197687	0.650072	0.840616	EXOSC7	stable	0.0754023
ENSG00000075945	0.138587	0.818789	0.926445	KIFAP3	stable	0.0331803
ENSG00000075975	0.165575	0.707261	0.87216	MKRN2	stable	0.0594038
ENSG00000076043	-0.170761	0.76821	0.901813	REXO2	stable	0.0448837
ENSG00000076053	-0.753484	0.315831	0.589922	RBM7	stable	0.229205
ENSG00000076067	0.0713491	0.873658	0.951573	RBMS2	stable	0.0215578
ENSG00000076108	0.142797	0.707595	0.872296	BAZ2A	stable	0.0593359
ENSG00000076201	-0.246432	0.544015	0.773874	PTPN23	stable	0.11133
ENSG00000076242	0.557317	0.199599	0.459896	MLH1	stable	0.33734
ENSG00000076248	0.068017	0.885916	0.956012	UNG	stable	0.0195368
ENSG00000076258	-0.572764	0.52947	0.76441	FMO4	stable	0.116673
ENSG00000076321	1.60558	0.0167741	0.0951439	KLHL20	stable	1.02162
ENSG00000076351	0.117958	0.787285	0.91281	SLC46A1	stable	0.0396197
ENSG00000076356	-0.181457	0.700111	0.86868	PLXNA2	stable	0.0611399
ENSG00000076382	0.612869	0.304769	0.579693	SPAG5	stable	0.236802
ENSG00000076513	0.0109595	0.98031	0.993667	ANKRD13A	stable	0.002759
ENSG00000076554	-0.930899	0.30973	0.583942	TPD52	stable	0.23363
ENSG00000076604	0.061723	0.910712	0.967141	TRAF4	stable	0.0145103
ENSG00000076641	0.712101	0.169539	0.419288	PAG1	stable	0.377487
ENSG00000076650	0.49639	0.347615	0.620189	GPATCH1	stable	0.207476
ENSG00000076662	0.0178706	0.977169	0.992467	ICAM3	stable	0.00328406
ENSG00000076685	-0.587022	0.159728	0.405432	NT5C2	stable	0.392082
ENSG00000076706	0.0750005	0.869059	0.949755	MCAM	stable	0.0223885
ENSG00000076770	1.77449	0.0512857	0.200238	MBNL3	stable	0.698453
ENSG00000076864	-1.56109	0.00868356	0.059991	RAP1GAP	stable	1.22191
ENSG00000076924	-0.497855	0.202044	0.462735	XAB2	stable	0.334668
ENSG00000076928	-0.607233	0.117217	0.339529	ARHGEF1	stable	0.469123
ENSG00000076944	-0.921511	0.0445049	0.182879	STXBP2	stable	0.737836
ENSG00000076984	-0.486642	0.23037	0.496804	MAP2K7	stable	0.303815
ENSG00000077044	0.331334	0.470284	0.721289	DGKD	stable	0.14189
ENSG00000077063	0.433248	0.395333	0.661538	CTTNBP2	stable	0.179445
ENSG00000077080	-2.55784	0.0112413	0.0724486	ACTL6B	stable	1.13997
ENSG00000077092	0.256672	0.741301	0.890354	RARB	stable	0.0504373
ENSG00000077097	0.448376	0.289723	0.564162	TOP2B	stable	0.248596
ENSG00000077147	0.0167188	0.972202	0.99083	TM9SF3	stable	0.00400101
ENSG00000077150	-0.603034	0.186459	0.442559	NFKB2	stable	0.354028
ENSG00000077152	1.14796	0.0659655	0.235724	UBE2T	stable	0.627596
ENSG00000077157	-1.14015	0.0371801	0.162042	PPP1R12B	stable	0.790374
ENSG00000077232	0.513942	0.184275	0.439923	DNAJC10	stable	0.356624
ENSG00000077235	-0.0533617	0.890689	0.95801	GTF3C1	stable	0.0186298
ENSG00000077238	-0.572509	0.183291	0.438171	IL4R	stable	0.358356
ENSG00000077254	0.724665	0.086783	0.281836	USP33	stable	0.550003
ENSG00000077264	-1.96013	0.0341245	0.153552	PAK3	stable	0.813744
ENSG00000077279	0.905533	0.434214	0.693312	DCX	stable	0.159071
ENSG00000077312	-0.0779849	0.868532	0.949638	SNRPA	stable	0.0224419
ENSG00000077327	-2.26479	0.174829	NA	SPAG6	stable	NA
ENSG00000077348	0.097449	0.84873	0.940663	EXOSC5	stable	0.0265657
ENSG00000077380	-0.0188006	0.970845	0.990552	DYNC1I2	stable	0.00412269
ENSG00000077420	-1.06898	0.00919569	0.0624268	APBB1IP	stable	1.20463
ENSG00000077454	0.45832	0.302843	0.577756	LRCH4	stable	0.238255
ENSG00000077458	0.95313	0.0863194	0.280804	FAM76B	stable	0.551597
ENSG00000077463	0.0921899	0.833003	0.933352	SIRT6	stable	0.0299547
ENSG00000077514	1.37846	0.00987057	0.065672	POLD3	stable	1.18262
ENSG00000077522	0.73752	0.116644	0.338653	ACTN2	stable	0.470246
ENSG00000077549	0.0234935	0.950629	0.983186	CAPZB	stable	0.00736409
ENSG00000077585	0.0201592	0.963768	0.98876	GPR137B	stable	0.00490927
ENSG00000077616	-2.54696	0.0177435	0.0990101	NAALAD2	stable	1.00432
ENSG00000077684	-0.240944	0.646803	0.839135	JADE1	stable	0.076168
ENSG00000077713	-0.368619	0.674366	0.854238	SLC25A43	stable	0.0684211
ENSG00000077721	0.876427	0.0355496	0.157594	UBE2A	stable	0.802459
ENSG00000077782	0.185647	0.64791	0.839883	FGFR1	stable	0.0757812
ENSG00000077943	-2.37683	0.199438	0.459662	ITGA8	stable	0.337561
ENSG00000077984	0.954572	0.547183	0.776082	CST7	stable	0.110092
ENSG00000078018	0.330486	0.4805	0.729803	MAP2	stable	0.136794
ENSG00000078043	0.335001	0.428047	0.688864	PIAS2	stable	0.161866
ENSG00000078061	0.274498	0.499001	0.743256	ARAF	stable	0.128862
ENSG00000078070	-0.627388	0.257281	0.528608	MCCC1	stable	0.276866
ENSG00000078081	1.56972	0.374074	0.643112	LAMP3	stable	0.191714
ENSG00000078098	-0.180177	0.828781	0.931293	FAP	stable	0.0309137
ENSG00000078124	-0.220896	0.648955	0.840167	ACER3	stable	0.0756343
ENSG00000078140	-0.0498411	0.918705	0.970531	UBE2K	stable	0.0129904
ENSG00000078142	0.104345	0.804646	0.920659	PIK3C3	stable	0.0359014
ENSG00000078177	1.50207	0.0329203	0.15015	N4BP2	stable	0.823474
ENSG00000078237	0.73736	0.198944	0.459111	TIGAR	stable	0.338083
ENSG00000078246	0.20291	0.650381	0.840686	TULP3	stable	0.0753664
ENSG00000078269	-0.771528	0.177371	0.430113	SYNJ2	stable	0.366418
ENSG00000078304	0.21772	0.563766	0.788291	PPP2R5C	stable	0.103314
ENSG00000078369	0.176944	0.632623	0.830565	GNB1	stable	0.0806264
ENSG00000078399	0.189656	0.897338	0.961351	HOXA9	stable	0.0171179
ENSG00000078401	-0.723713	0.175677	0.427824	EDN1	stable	0.368735
ENSG00000078403	0.675173	0.165457	0.41376	MLLT10	stable	0.383252
ENSG00000078549	-1.26889	0.0892554	0.286126	ADCYAP1R1	stable	0.543443
ENSG00000078579	0.328996	0.786761	0.912633	FGF20	stable	0.0397038
ENSG00000078589	-1.10023	0.709577	NA	P2RY10	stable	NA
ENSG00000078596	0.473723	0.511586	0.751428	ITM2A	stable	0.124113
ENSG00000078618	-0.0706194	0.87457	0.951937	NRDC	stable	0.0213919
ENSG00000078668	-0.7387	0.0464928	0.188016	VDAC3	stable	0.725805
ENSG00000078674	0.318401	0.384011	0.651503	PCM1	stable	0.186084
ENSG00000078687	-1.13176	0.00914167	0.0622307	TNRC6C	stable	1.206
ENSG00000078699	-0.235247	0.584431	0.802053	CBFA2T2	stable	0.0957969
ENSG00000078747	0.8352	0.0812042	0.269992	ITCH	stable	0.568649
ENSG00000078808	0.307618	0.416773	0.679856	SDF4	stable	0.167583
ENSG00000078898	1.87543	0.2603	0.531975	BPIFB2	stable	0.274109
ENSG00000078900	0.642155	0.480605	0.729847	TP73	stable	0.136768
ENSG00000078967	-0.150736	0.750239	0.89443	UBE2D4	stable	0.0484539
ENSG00000079101	-0.454983	0.780606	0.909355	CLUL1	stable	0.0412668
ENSG00000079102	-0.935458	0.21914	0.484942	RUNX1T1	stable	0.31431
ENSG00000079134	-0.0457933	0.920977	0.9714	THOC1	stable	0.0126018
ENSG00000079150	2.40841	0.0142085	0.0850277	FKBP7	stable	1.07044
ENSG00000079156	0.268534	0.617705	0.821561	OSBPL6	stable	0.0853604
ENSG00000079215	-0.680885	0.175336	0.427279	SLC1A3	stable	0.369288
ENSG00000079246	0.837553	0.0272755	0.132929	XRCC5	stable	0.87638
ENSG00000079257	1.89601	0.0437554	0.180918	LXN	stable	0.742518
ENSG00000079263	-0.523057	0.499717	0.743722	SP140	stable	0.128589
ENSG00000079308	-0.719208	0.208079	0.471014	TNS1	stable	0.326966
ENSG00000079313	-0.315997	0.465121	0.717542	REXO1	stable	0.144153
ENSG00000079332	-0.131467	0.746604	0.892682	SAR1A	stable	0.0493031
ENSG00000079335	0.408788	0.643123	0.837289	CDC14A	stable	0.0771248
ENSG00000079385	3.40903	0.110369	0.326313	CEACAM1	stable	0.486366
ENSG00000079387	0.764098	0.145631	0.385231	SENP1	stable	0.414278
ENSG00000079432	0.0159322	0.967242	0.989467	CIC	stable	0.00459875
ENSG00000079459	-0.829228	0.0928002	0.29305	FDFT1	stable	0.533058
ENSG00000079462	0.338437	0.438419	0.69687	PAFAH1B3	stable	0.156848
ENSG00000079482	-0.788634	0.106944	0.320624	OPHN1	stable	0.494004
ENSG00000079616	0.275821	0.543083	0.773116	KIF22	stable	0.111755
ENSG00000079691	0.0881679	0.848959	0.940711	CARMIL1	stable	0.0265436
ENSG00000079739	0.400152	0.400095	0.666159	PGM1	stable	0.176422
ENSG00000079785	0.861305	0.0338152	0.15241	DDX1	stable	0.816987
ENSG00000079805	-0.442484	0.224883	0.490125	DNM2	stable	0.309693
ENSG00000079819	-0.893073	0.0229386	0.118113	EPB41L2	stable	0.927701
ENSG00000079841	-1.08407	0.162318	0.409041	RIMS1	stable	0.388233
ENSG00000079950	-0.631527	0.173681	0.425004	STX7	stable	0.371607
ENSG00000079974	0.234599	0.556626	0.782566	RABL2B	stable	0.106479
ENSG00000079999	-0.205057	0.622633	0.824521	KEAP1	stable	0.0837981
ENSG00000080031	-2.54201	0.0185118	0.101736	PTPRH	stable	0.992527
ENSG00000080166	-0.170373	0.867271	0.949249	DCT	stable	0.0226198
ENSG00000080189	-0.346571	0.404503	0.669527	SLC35C2	stable	0.174232
ENSG00000080200	-0.345252	0.579751	0.799033	CRYBG3	stable	0.0974352
ENSG00000080224	-0.762443	0.798841	NA	EPHA6	stable	NA
ENSG00000080345	0.604718	0.163744	0.411009	RIF1	stable	0.386148
ENSG00000080371	0.294311	0.57522	0.795874	RAB21	stable	0.0991555
ENSG00000080493	0.408599	0.427417	0.688725	SLC4A4	stable	0.161954
ENSG00000080503	0.0283813	0.950935	0.98329	SMARCA2	stable	0.00731841
ENSG00000080546	-0.4541	0.377285	0.646066	SESN1	stable	0.189723
ENSG00000080561	1.30897	0.265415	0.53747	MID2	stable	0.269646
ENSG00000080608	1.07617	0.0289431	0.13845	PUM3	stable	0.858707
ENSG00000080644	0.147576	0.957633	NA	CHRNA3	stable	NA
ENSG00000080802	0.410073	0.40542	0.670526	CNOT4	stable	0.173584
ENSG00000080815	-0.284497	0.505167	0.746897	PSEN1	stable	0.126739
ENSG00000080819	-0.157953	0.820881	0.927505	CPOX	stable	0.0326838
ENSG00000080823	-0.451434	0.341624	0.614833	MOK	stable	0.211243
ENSG00000080824	-0.441034	0.371788	0.640982	HSP90AA1	stable	0.193154
ENSG00000080839	1.19106	0.052105	0.202289	RBL1	stable	0.694028
ENSG00000080845	-0.0127167	0.973158	0.991319	DLGAP4	stable	0.00378647
ENSG00000080854	1.77658	0.0263804	0.129882	IGSF9B	stable	0.88645
ENSG00000080947	0.507003	0.372127	0.641323	CROCCP3	stable	0.192923
ENSG00000081014	0.730494	0.22482	0.490115	AP4E1	stable	0.309702
ENSG00000081019	1.31019	0.0139413	0.0838394	RSBN1	stable	1.07655
ENSG00000081026	0.375991	0.512086	0.751875	MAGI3	stable	0.123855
ENSG00000081041	-1.06324	0.238606	0.506796	CXCL2	stable	0.295166
ENSG00000081052	-1.55429	0.110232	0.32621	COL4A4	stable	0.486503
ENSG00000081059	-0.391434	0.614331	0.819846	TCF7	stable	0.086268
ENSG00000081087	1.31819	0.013953	0.0838575	OSTM1	stable	1.07646
ENSG00000081138	-4.30906	0.0322883	0.148162	CDH7	stable	0.829264
ENSG00000081148	0.828333	0.576785	0.796551	IMPG2	stable	0.0987862
ENSG00000081154	0.90372	0.0231201	0.118636	PCNP	stable	0.925784
ENSG00000081177	0.426858	0.328276	0.602101	EXD2	stable	0.22033
ENSG00000081181	-0.995567	0.263677	0.535353	ARG2	stable	0.27136
ENSG00000081237	0.663626	0.279465	0.553137	PTPRC	stable	0.257168
ENSG00000081248	-3.38911	0.0655805	0.234914	CACNA1S	stable	0.62909
ENSG00000081277	-2.41843	0.231583	NA	PKP1	stable	NA
ENSG00000081307	0.533111	0.202698	0.463406	UBA5	stable	0.334038
ENSG00000081320	0.138103	0.83815	0.935388	STK17B	stable	0.029008
ENSG00000081377	0.599708	0.163806	0.411072	CDC14B	stable	0.386082
ENSG00000081386	0.761238	0.111851	0.329432	ZNF510	stable	0.482234
ENSG00000081665	0.164602	0.746319	0.89257	ZNF506	stable	0.0493579
ENSG00000081692	-0.304056	0.521682	0.758595	JMJD4	stable	0.11999
ENSG00000081721	1.14121	0.0331162	0.150598	DUSP12	stable	0.822181
ENSG00000081760	-0.96486	0.0299225	0.141662	AACS	stable	0.848748
ENSG00000081791	0.113154	0.766441	0.901416	DELE1	stable	0.0450749
ENSG00000081818	0.565549	0.538986	0.771039	PCDHB4	stable	0.112924
ENSG00000081842	1.62191	0.67294	0.853657	PCDHA6	stable	0.0687164
ENSG00000081853	-0.102903	0.92136	0.971424	PCDHGA2	stable	0.0125913
ENSG00000081870	1.13626	0.0246975	0.123828	HSPB11	stable	0.907181
ENSG00000081913	-0.598464	0.126052	0.354409	PHLPP1	stable	0.450496
ENSG00000081923	1.40814	0.305552	0.580438	ATP8B1	stable	0.236244
ENSG00000081985	-1.76276	0.375373	NA	IL12RB2	stable	NA
[truncated: 16,647 more rows]
