# Supplementary material
Source: Research Square preprint supplement (doi:10.21203/rs.3.rs-6009404/v1)
Supplement: Supplementary file 9 [file bc9af7758da6fd0e67f68c4e.xlsx]

## Sheet: IQGAP3 kd_vs_nt_LFC0.585
shIQGAP3 vs. shCONT (RNA-seq)
	log2FoldChange	pvalue	padj	gene_name	group
ENSG00000116147	4.15265	6.26598e-30	7.83123e-26	TNR	up
ENSG00000130766	1.93891	4.82477e-18	3.015e-14	SESN2	up
ENSG00000176046	2.56812	2.52782e-17	1.05309e-13	NUPR1	up
ENSG00000115266	1.84158	6.59416e-17	2.06034e-13	APC2	up
ENSG00000107731	2.34979	1.37191e-16	3.42922e-13	UNC5B	up
ENSG00000106948	2.4152	1.40726e-14	2.93133e-11	AKNA	up
ENSG00000101255	1.79042	5.85096e-14	9.8982e-11	TRIB3	up
ENSG00000127528	2.00744	6.33586e-14	9.8982e-11	KLF2	up
ENSG00000196517	1.94472	6.08421e-13	8.44894e-10	SLC6A9	up
ENSG00000177700	-1.55718	3.2506e-12	4.0626e-09	POLR2L	down
ENSG00000099194	-1.4333	3.85691e-12	4.38215e-09	SCD	down
ENSG00000115541	-1.6916	4.7517e-12	4.9489e-09	HSPE1	down
ENSG00000120437	-1.49998	7.53349e-12	6.72525e-09	ACAT2	down
ENSG00000128165	1.67947	7.04456e-12	6.72525e-09	ADM2	up
ENSG00000106268	-1.82001	8.20968e-12	6.84031e-09	NUDT1	down
ENSG00000176340	-1.45299	2.41849e-11	1.77802e-08	COX8A	down
ENSG00000178531	-1.54412	2.29806e-11	1.77802e-08	CTXN1	down
ENSG00000080824	-1.27872	2.89656e-11	2.01118e-08	HSP90AA1	down
ENSG00000143228	-1.98457	3.34373e-11	2.08949e-08	NUF2	down
ENSG00000151012	1.54679	3.30245e-11	2.08949e-08	SLC7A11	up
ENSG00000100095	1.61041	4.88601e-11	2.90788e-08	SEZ6L	up
ENSG00000262814	-1.77956	7.51869e-11	4.2713e-08	MRPL12	down
ENSG00000157514	1.46289	8.07375e-11	4.3872e-08	TSC22D3	up
ENSG00000180573	2.44146	1.08019e-10	5.62508e-08	HIST1H2AC	up
ENSG00000110042	3.12054	1.24457e-10	6.22186e-08	DTX4	up
ENSG00000128965	1.74059	1.31446e-10	6.31849e-08	CHAC1	up
ENSG00000111247	-1.58303	1.89098e-10	8.75315e-08	RAD51AP1	down
ENSG00000156802	-1.28479	2.3831e-10	1.06371e-07	ATAD2	down
ENSG00000123384	1.72616	2.93808e-10	1.22401e-07	LRP1	up
ENSG00000112312	-1.47428	2.92906e-10	1.22401e-07	GMNN	down
ENSG00000110090	1.68672	3.74883e-10	1.51138e-07	CPT1A	up
ENSG00000072571	-1.81682	4.13572e-10	1.61526e-07	HMMR	down
ENSG00000163873	2.1197	5.09417e-10	1.9293e-07	GRIK3	up
ENSG00000183856	-2.17098	5.9206e-10	2.17634e-07	IQGAP3	down
ENSG00000183011	-1.37013	7.0244e-10	2.50831e-07	NAA38	down
ENSG00000138778	-1.9927	8.93325e-10	3.10133e-07	CENPE	down
ENSG00000124767	-1.25383	9.98252e-10	3.3329e-07	GLO1	down
ENSG00000170312	-1.80157	1.01336e-09	3.3329e-07	CDK1	down
ENSG00000111775	-1.36551	1.07108e-09	3.38861e-07	COX6A1	down
ENSG00000121621	-1.76133	1.08453e-09	3.38861e-07	KIF18A	down
ENSG00000006634	-1.46723	1.3892e-09	4.23469e-07	DBF4	down
ENSG00000189057	-1.42916	1.47343e-09	4.38452e-07	FAM111B	down
ENSG00000151725	-1.4551	1.63037e-09	4.63098e-07	CENPU	down
ENSG00000024526	-1.92276	1.61968e-09	4.63098e-07	DEPDC1	down
ENSG00000138182	-1.59717	1.71801e-09	4.77148e-07	KIF20B	down
ENSG00000012048	-1.40322	2.10123e-09	5.70894e-07	BRCA1	down
ENSG00000106554	-1.28137	3.17376e-09	8.43949e-07	CHCHD3	down
ENSG00000112742	-1.96966	3.25585e-09	8.47741e-07	TTK	down
ENSG00000189403	-1.19339	3.48166e-09	8.70276e-07	HMGB1	down
ENSG00000164104	-1.51583	3.43338e-09	8.70276e-07	HMGB2	down
ENSG00000203760	-2.11433	3.76768e-09	9.23304e-07	CENPW	down
ENSG00000087085	2.22231	4.15455e-09	9.98529e-07	ACHE	up
ENSG00000155980	1.52994	5.53531e-09	1.30529e-06	KIF5A	up
ENSG00000163535	-1.81582	6.90854e-09	1.59894e-06	SGO2	down
ENSG00000155959	-1.25031	7.26542e-09	1.65097e-06	VBP1	down
ENSG00000198830	-1.12845	7.66367e-09	1.71037e-06	HMGN2	down
ENSG00000121211	-2.03213	7.88902e-09	1.72977e-06	MND1	down
ENSG00000051108	1.26002	8.11168e-09	1.74793e-06	HERPUD1	up
ENSG00000129235	-1.38416	8.56451e-09	1.79056e-06	TXNDC17	down
ENSG00000198133	2.23252	8.59605e-09	1.79056e-06	TMEM229B	up
ENSG00000142731	-1.53614	8.86931e-09	1.81719e-06	PLK4	down
ENSG00000197299	-1.44711	1.17995e-08	2.37856e-06	BLM	down
ENSG00000171320	-1.64443	1.66793e-08	3.30886e-06	ESCO2	down
ENSG00000138180	-1.73958	1.70012e-08	3.32001e-06	CEP55	down
ENSG00000166803	-1.89373	1.76726e-08	3.39803e-06	PCLAF	down
ENSG00000140105	1.39576	1.91072e-08	3.51179e-06	WARS	up
ENSG00000080986	-1.5256	1.85572e-08	3.51179e-06	NDC80	down
ENSG00000099822	1.66968	1.89901e-08	3.51179e-06	HCN2	up
ENSG00000109805	-1.54559	2.46655e-08	4.40384e-06	NCAPG	down
ENSG00000108465	1.71717	2.45111e-08	4.40384e-06	CDK5RAP3	up
ENSG00000160752	-1.21577	2.59831e-08	4.57376e-06	FDPS	down
ENSG00000152240	-1.30802	2.64164e-08	4.58544e-06	HAUS1	down
ENSG00000124201	1.7453	2.68031e-08	4.58884e-06	ZNFX1	up
ENSG00000115414	1.20531	2.75844e-08	4.65878e-06	FN1	up
ENSG00000239672	-1.29001	3.1729e-08	5.15834e-06	NME1	down
ENSG00000136824	-1.27853	3.12815e-08	5.15834e-06	SMC2	down
ENSG00000125995	-1.45421	3.17805e-08	5.15834e-06	ROMO1	down
ENSG00000241468	-1.15301	3.47734e-08	5.57177e-06	ATP5MF	down
ENSG00000131187	-1.42399	3.86523e-08	6.1149e-06	F12	down
ENSG00000112695	-1.1966	4.00224e-08	6.25249e-06	COX7A2	down
ENSG00000011426	-1.16329	5.02068e-08	7.74673e-06	ANLN	down
ENSG00000141759	-1.1185	5.16677e-08	7.87492e-06	TXNL4A	down
ENSG00000163507	-1.38566	5.58834e-08	8.41483e-06	CIP2A	down
ENSG00000099385	-1.33088	5.8365e-08	8.68388e-06	BCL7C	down
ENSG00000114346	-1.45455	6.12285e-08	9.00275e-06	ECT2	down
ENSG00000196976	-1.6335	6.34318e-08	9.21826e-06	LAGE3	down
ENSG00000119333	-1.26823	6.52421e-08	9.37237e-06	WDR34	down
ENSG00000165490	-1.46376	6.75708e-08	9.59659e-06	DDIAS	down
ENSG00000152082	-1.41259	7.14649e-08	1.00356e-05	MZT2B	down
ENSG00000137804	-1.84966	8.06991e-08	1.12064e-05	NUSAP1	down
ENSG00000094804	-1.51155	9.23564e-08	1.26843e-05	CDC6	down
ENSG00000170271	1.6645	9.77736e-08	1.32823e-05	FAXDC2	up
ENSG00000143977	-1.27571	1.1036e-07	1.4831e-05	SNRPG	down
ENSG00000076382	-1.52631	1.16851e-07	1.55362e-05	SPAG5	down
ENSG00000165891	-1.24043	1.31154e-07	1.72544e-05	E2F7	down
ENSG00000008710	1.10954	1.3306e-07	1.73227e-05	PKD1	up
ENSG00000092841	-1.0456	1.63629e-07	2.10828e-05	MYL6	down
ENSG00000168078	-1.74821	1.82747e-07	2.33058e-05	PBK	down
ENSG00000148834	-1.19754	1.86379e-07	2.35289e-05	GSTO1	down
ENSG00000109084	-1.18399	1.88654e-07	2.35779e-05	TMEM97	down
ENSG00000090266	-1.10731	1.93944e-07	2.39992e-05	NDUFB2	down
ENSG00000138160	-1.4774	1.98996e-07	2.43828e-05	KIF11	down
ENSG00000171208	-1.09844	2.01781e-07	2.44841e-05	NETO2	down
ENSG00000139428	-1.27832	2.08762e-07	2.48487e-05	MMAB	down
ENSG00000113739	1.4693	2.07342e-07	2.48487e-05	STC2	up
ENSG00000171241	-1.51047	2.35898e-07	2.78137e-05	SHCBP1	down
ENSG00000066279	-1.58806	2.42059e-07	2.82734e-05	ASPM	down
ENSG00000197558	1.78857	3.05163e-07	3.53141e-05	SSPO	up
ENSG00000175155	2.01195	3.10648e-07	3.56191e-05	YPEL2	up
ENSG00000172301	-1.24149	3.17062e-07	3.60241e-05	COPRS	down
ENSG00000138587	-1.62054	3.23154e-07	3.63853e-05	MNS1	down
ENSG00000171951	-1.11347	3.42258e-07	3.81924e-05	SCG2	down
ENSG00000105270	1.13046	4.09202e-07	4.52584e-05	CLIP3	up
ENSG00000137812	-1.57733	4.19437e-07	4.55837e-05	KNL1	down
ENSG00000130813	1.94937	4.18616e-07	4.55837e-05	C19orf66	up
ENSG00000114019	1.66871	4.41081e-07	4.75227e-05	AMOTL2	up
ENSG00000130332	-1.07226	4.57659e-07	4.88874e-05	LSM7	down
ENSG00000175662	1.26249	4.7349e-07	5.01498e-05	TOM1L2	up
ENSG00000108106	-1.37114	5.15302e-07	5.38559e-05	UBE2S	down
ENSG00000197081	1.10279	5.21409e-07	5.38559e-05	IGF2R	up
ENSG00000184983	-1.05076	5.17139e-07	5.38559e-05	NDUFA6	down
ENSG00000163918	-1.30275	5.34168e-07	5.47216e-05	RFC4	down
ENSG00000122952	-1.52487	5.42249e-07	5.50978e-05	ZWINT	down
ENSG00000129810	-1.74622	5.53709e-07	5.58085e-05	SGO1	down
ENSG00000184661	-1.28545	5.65553e-07	5.65463e-05	CDCA2	down
ENSG00000131153	-1.47331	5.7084e-07	5.66219e-05	GINS2	down
ENSG00000181218	1.23819	5.93987e-07	5.84539e-05	HIST3H2A	up
ENSG00000123416	-1.34343	6.14313e-07	5.99819e-05	TUBA1B	down
ENSG00000166681	-1.07674	6.34315e-07	6.14548e-05	BEX3	down
ENSG00000198554	-1.12273	6.6633e-07	6.40599e-05	WDHD1	down
ENSG00000130477	1.38154	6.87454e-07	6.55863e-05	UNC13A	up
ENSG00000166582	-1.19365	7.49236e-07	7.0939e-05	CENPV	down
ENSG00000167702	1.1713	7.83954e-07	7.36681e-05	KIFC2	up
ENSG00000115350	-1.32199	7.90261e-07	7.37066e-05	POLE4	down
ENSG00000133943	1.32108	8.45729e-07	7.82957e-05	DGLUCY	up
ENSG00000163346	1.17507	8.62374e-07	7.92496e-05	PBXIP1	up
ENSG00000171608	1.76531	9.47918e-07	8.6475e-05	PIK3CD	up
ENSG00000116285	1.2712	9.55902e-07	8.65715e-05	ERRFI1	up
ENSG00000108518	-0.994997	9.73527e-07	8.75334e-05	PFN1	down
ENSG00000134824	-1.03454	1.04549e-06	9.33323e-05	FADS2	down
ENSG00000173207	-1.40038	1.0925e-06	9.68372e-05	CKS1B	down
ENSG00000124733	-1.11112	1.1334e-06	9.97555e-05	MEA1	down
ENSG00000136982	-1.28431	1.14351e-06	9.9941e-05	DSCC1	down
ENSG00000198929	1.2502	1.16568e-06	0.000101171	NOS1AP	up
ENSG00000162062	-1.37373	1.18181e-06	0.000101864	TEDC2	down
ENSG00000128708	-1.11137	1.20846e-06	0.000102783	HAT1	down
ENSG00000070950	-1.25397	1.20892e-06	0.000102783	RAD18	down
ENSG00000100442	-1.07277	1.31424e-06	0.000110238	FKBP3	down
ENSG00000174442	-1.16332	1.3067e-06	0.000110238	ZWILCH	down
ENSG00000116459	-1.01175	1.33699e-06	0.000111398	ATP5PB	down
ENSG00000156299	1.87553	1.38081e-06	0.000114287	TIAM1	up
ENSG00000124795	-1.02217	1.39469e-06	0.000114677	DEK	down
ENSG00000128951	-1.08034	1.41125e-06	0.00011528	DUT	down
ENSG00000173674	-1.09897	1.46178e-06	0.000118632	EIF1AX	down
ENSG00000143476	-1.35131	1.48487e-06	0.000119728	DTL	down
ENSG00000112029	-1.16973	1.51676e-06	0.000121516	FBXO5	down
ENSG00000103257	1.20519	1.59549e-06	0.000127009	SLC7A5	up
ENSG00000082153	-0.966252	1.63903e-06	0.000129141	BZW1	down
ENSG00000125743	-1.04234	1.64294e-06	0.000129141	SNRPD2	down
ENSG00000277972	-1.24144	1.70622e-06	0.000133277	CISD3	down
ENSG00000124207	-0.974331	1.75895e-06	0.000136543	CSE1L	down
ENSG00000105011	-1.49004	2.01377e-06	0.000155358	ASF1B	down
ENSG00000168672	1.67842	2.06179e-06	0.000158087	FAM84B	up
ENSG00000106399	-1.2153	2.18792e-06	0.000166735	RPA3	down
ENSG00000228474	-1.03171	2.25597e-06	0.000170879	OST4	down
ENSG00000100804	-0.98551	2.2979e-06	0.000173007	PSMB5	down
ENSG00000188486	-1.46142	2.41441e-06	0.000178552	H2AFX	down
ENSG00000170581	1.64247	2.39318e-06	0.000178552	STAT2	up
ENSG00000172985	1.32267	2.41041e-06	0.000178552	SH3RF3	up
ENSG00000131242	1.42256	2.47133e-06	0.000181686	RAB11FIP4	up
ENSG00000184207	-1.16686	2.55608e-06	0.000186818	PGP	down
ENSG00000170689	2.0204	2.66279e-06	0.000193486	HOXB9	up
ENSG00000145494	-1.1583	2.69967e-06	0.000195031	NDUFS6	down
ENSG00000111716	-1.1712	2.74555e-06	0.000197206	LDHB	down
ENSG00000136826	1.96243	2.80693e-06	0.000200349	KLF4	up
ENSG00000163121	3.49829	2.82137e-06	0.000200349	NEURL3	up
ENSG00000173821	1.31465	2.8865e-06	0.000203816	RNF213	up
ENSG00000158406	1.79715	2.98205e-06	0.00020938	HIST1H4H	up
ENSG00000106211	-1.11221	3.09125e-06	0.000215835	HSPB1	down
ENSG00000166750	5.04358	3.11113e-06	0.000216016	SLFN5	up
ENSG00000119421	-1.26147	3.15272e-06	0.000217695	NDUFA8	down
ENSG00000091490	1.40105	3.29599e-06	0.000226337	SEL1L3	up
ENSG00000128335	1.43706	3.33664e-06	0.000227876	APOL2	up
ENSG00000133321	2.2264	3.37247e-06	0.000229071	RARRES3	up
ENSG00000077152	-1.40741	3.52207e-06	0.00023794	UBE2T	down
ENSG00000117724	-1.34963	3.58259e-06	0.00023944	CENPF	down
ENSG00000164405	-0.981105	3.57e-06	0.00023944	UQCRQ	down
ENSG00000100632	-0.947489	3.67899e-06	0.000244574	ERH	down
ENSG00000196262	-1.04508	3.83397e-06	0.000253529	PPIA	down
ENSG00000168916	1.11087	3.92254e-06	0.000258021	ZNF608	up
ENSG00000166123	1.03021	4.02032e-06	0.000262748	GPT2	up
ENSG00000145386	-1.5039	4.03646e-06	0.000262748	CCNA2	down
ENSG00000102317	-0.933797	4.182e-06	0.000268034	RBM3	down
ENSG00000165502	-0.967191	4.14452e-06	0.000268034	RPL36AL	down
ENSG00000156453	1.3229	4.16438e-06	0.000268034	PCDH1	up
ENSG00000140044	1.43526	4.43286e-06	0.000282663	JDP2	up
ENSG00000176890	-1.41137	4.48288e-06	0.000284401	TYMS	down
ENSG00000099795	-0.958282	4.56118e-06	0.000287907	NDUFB7	down
ENSG00000229117	-0.983855	4.63728e-06	0.000289943	RPL41	down
ENSG00000131747	-1.40487	4.66303e-06	0.000289943	TOP2A	down
ENSG00000140525	-1.26618	4.65377e-06	0.000289943	FANCI	down
ENSG00000140538	1.17323	4.71018e-06	0.00028999	NTRK3	up
ENSG00000161981	-1.13946	4.69119e-06	0.00028999	SNRNP25	down
ENSG00000129195	-1.52072	4.93625e-06	0.000302418	PIMREG	down
ENSG00000104979	-0.943887	5.05308e-06	0.000307725	C19orf53	down
ENSG00000119326	-1.03168	5.07213e-06	0.000307725	CTNNAL1	down
ENSG00000012822	1.07198	5.12742e-06	0.000309578	CALCOCO1	up
ENSG00000128050	-1.03597	5.24646e-06	0.000313543	PAICS	down
ENSG00000092853	-1.20505	5.26836e-06	0.000313543	CLSPN	down
ENSG00000166451	-1.25117	5.23676e-06	0.000313543	CENPN	down
ENSG00000171388	-1.98004	5.73627e-06	0.000339772	APLN	down
ENSG00000006327	-1.03361	5.9291e-06	0.000349537	TNFRSF12A	down
ENSG00000100243	-0.963851	6.06191e-06	0.000355689	CYB5R3	down
ENSG00000172432	0.950831	6.16834e-06	0.000360243	GTPBP2	up
ENSG00000127540	-1.0885	6.32142e-06	0.0003659	UQCR11	down
ENSG00000141933	-1.16182	6.32376e-06	0.0003659	TPGS1	down
ENSG00000112208	-1.32789	6.50709e-06	0.000374772	BAG2	down
ENSG00000168003	0.966147	6.54269e-06	0.000375094	SLC3A2	up
ENSG00000116584	0.922757	6.59384e-06	0.0003763	ARHGEF2	up
ENSG00000106772	0.982306	6.75995e-06	0.000384027	PRUNE2	up
ENSG00000173848	-1.46066	7.15485e-06	0.000404621	NET1	down
ENSG00000085840	-1.25759	7.25337e-06	0.000408345	ORC1	down
ENSG00000128973	-1.08861	7.29447e-06	0.000408817	CLN6	down
ENSG00000126787	-1.47892	7.44127e-06	0.000415183	DLGAP5	down
ENSG00000149554	-1.1833	7.64083e-06	0.000424423	CHEK1	down
ENSG00000184897	-1.20446	7.75796e-06	0.000429022	H1FX	down
ENSG00000198826	-1.36639	7.88508e-06	0.000434131	ARHGAP11A	down
ENSG00000153044	-1.44617	8.0116e-06	0.000439162	CENPH	down
ENSG00000123240	1.1799	8.07323e-06	0.000440608	OPTN	up
ENSG00000166136	-1.19953	8.114e-06	0.000440908	NDUFB8	down
ENSG00000173457	-1.05942	8.18203e-06	0.00044268	PPP1R14B	down
ENSG00000136942	-1.0144	8.33333e-06	0.000448922	RPL35	down
ENSG00000159873	-1.18094	8.45448e-06	0.000451556	CCDC117	down
ENSG00000136159	-1.21898	8.43671e-06	0.000451556	NUDT15	down
ENSG00000121440	1.69912	8.63258e-06	0.000459106	PDZRN3	up
ENSG00000156261	-0.872011	8.76138e-06	0.000463982	CCT8	down
ENSG00000136104	-1.13087	9.2391e-06	0.000487216	RNASEH2B	down
ENSG00000239887	1.05844	9.45337e-06	0.000496421	C1orf226	up
ENSG00000188157	0.909038	9.51287e-06	0.000497455	AGRN	up
ENSG00000168062	3.44716	9.56277e-06	0.000497981	BATF2	up
ENSG00000034510	-0.891207	9.90954e-06	0.000512122	TMSB10	down
ENSG00000117139	0.924203	9.91627e-06	0.000512122	KDM5B	up
ENSG00000100889	0.966236	1.00419e-05	0.000514362	PCK2	up
ENSG00000147383	-1.12859	1.00339e-05	0.000514362	NSDHL	down
ENSG00000167178	2.6386	1.02501e-05	0.00052288	ISLR2	up
ENSG00000100100	1.50359	1.0726e-05	0.000544933	PIK3IP1	up
ENSG00000198805	-1.26676	1.11078e-05	0.00055978	PNP	down
ENSG00000135441	-1.10078	1.1077e-05	0.00055978	BLOC1S1	down
ENSG00000125356	-1.13867	1.11684e-05	0.000560572	NDUFA1	down
ENSG00000157150	1.52828	1.14769e-05	0.000573753	TIMP4	up
ENSG00000070669	1.84322	1.1554e-05	0.000575307	ASNS	up
ENSG00000129255	-0.946709	1.16061e-05	0.000575605	MPDU1	down
ENSG00000130287	2.04003	1.19456e-05	0.000590103	NCAN	up
ENSG00000166224	0.938527	1.24821e-05	0.000614177	SGPL1	up
ENSG00000165304	-1.28717	1.30106e-05	0.000637671	MELK	down
ENSG00000168653	-0.91232	1.34688e-05	0.000657552	NDUFS5	down
ENSG00000123080	-0.941253	1.37445e-05	0.000668399	CDKN2C	down
ENSG00000255690	-0.987104	1.40326e-05	0.000679766	TRIL	down
ENSG00000143158	-1.1615	1.41882e-05	0.000684649	MPC2	down
ENSG00000167863	-0.950616	1.42795e-05	0.000686407	ATP5PD	down
ENSG00000130702	0.950246	1.51705e-05	0.000724583	LAMA5	up
ENSG00000228300	-0.977845	1.51897e-05	0.000724583	C19orf24	down
ENSG00000166147	1.18221	1.54592e-05	0.000734634	FBN1	up
ENSG00000175063	-1.58209	1.56368e-05	0.000740259	UBE2C	down
ENSG00000168961	3.21617	1.57577e-05	0.000743171	LGALS9	up
ENSG00000105499	1.73131	1.58594e-05	0.000745155	PLA2G4C	up
ENSG00000167325	-1.0968	1.63273e-05	0.000764264	RRM1	down
ENSG00000185565	1.01711	1.66506e-05	0.000776489	LSAMP	up
ENSG00000171848	-1.34975	1.67991e-05	0.000780504	RRM2	down
ENSG00000133119	-1.15601	1.70072e-05	0.000787244	RFC3	down
ENSG00000189043	-0.856985	1.71634e-05	0.000791543	NDUFA4	down
ENSG00000100526	-1.53375	1.72983e-05	0.000791919	CDKN3	down
ENSG00000102935	2.05631	1.72487e-05	0.000791919	ZNF423	up
ENSG00000108387	1.27065	1.73705e-05	0.000792322	2024-09-04	up
ENSG00000126368	1.33486	1.74793e-05	0.000794387	NR1D1	up
ENSG00000118503	1.45314	1.79333e-05	0.000812066	TNFAIP3	up
ENSG00000100097	-0.98461	1.80429e-05	0.00081408	LGALS1	down
ENSG00000109971	-0.890682	1.89056e-05	0.000843261	HSPA8	down
ENSG00000101199	0.96014	1.89595e-05	0.000843261	ARFGAP1	up
ENSG00000150779	-1.05139	1.88122e-05	0.000843261	TIMM8B	down
ENSG00000129534	-1.15341	1.88753e-05	0.000843261	MIS18BP1	down
ENSG00000123975	-1.22512	1.93882e-05	0.000859267	CKS2	down
ENSG00000164109	-1.35604	1.96259e-05	0.000864348	MAD2L1	down
ENSG00000147155	-0.983842	1.96411e-05	0.000864348	EBP	down
ENSG00000170892	-1.0006	1.99678e-05	0.000875639	TSEN34	down
ENSG00000197119	0.926457	2.02865e-05	0.000886506	SLC25A29	up
ENSG00000144381	-0.952479	2.17953e-05	0.000937773	HSPD1	down
ENSG00000058668	0.884227	2.17749e-05	0.000937773	ATP2B4	up
ENSG00000086504	-0.960822	2.16435e-05	0.000937773	MRPL28	down
ENSG00000163808	-1.26918	2.18706e-05	0.000937773	KIF15	down
ENSG00000139112	1.25235	2.19099e-05	0.000937773	GABARAPL1	up
ENSG00000130208	-2.53028	2.16993e-05	0.000937773	APOC1	down
ENSG00000100479	-1.13111	2.22489e-05	0.000949034	POLE2	down
ENSG00000105968	-0.914772	2.27824e-05	0.000968483	H2AFV	down
ENSG00000142856	-1.03006	2.286e-05	0.000968488	ITGB3BP	down
ENSG00000140307	-0.961208	2.38488e-05	0.00100697	GTF2A2	down
ENSG00000145912	-1.00694	2.40307e-05	0.00101123	NHP2	down
ENSG00000140264	-0.922542	2.44275e-05	0.00101765	SERF2	down
ENSG00000042753	-0.917653	2.42915e-05	0.00101765	AP2S1	down
ENSG00000158373	1.59007	2.43803e-05	0.00101765	HIST1H2BD	up
ENSG00000115902	0.995776	2.45333e-05	0.00101866	SLC1A4	up
ENSG00000184489	-1.00959	2.47864e-05	0.00102576	PTP4A3	down
ENSG00000166173	1.08653	2.4969e-05	0.00102991	LARP6	up
ENSG00000134030	1.05784	2.52753e-05	0.00103912	CTIF	up
ENSG00000168061	-1.25613	2.58895e-05	0.00106088	SAC3D1	down
ENSG00000079459	-0.948638	2.60764e-05	0.00106504	FDFT1	down
ENSG00000196116	1.97426	2.61694e-05	0.00106536	TDRD7	up
ENSG00000101773	-0.941628	2.64185e-05	0.00107201	RBBP8	down
ENSG00000134809	-0.991112	2.66816e-05	0.00107918	TIMM10	down
ENSG00000143401	-0.931959	2.68864e-05	0.00108396	ANP32E	down
ENSG00000112972	-0.936015	2.76961e-05	0.00111301	HMGCS1	down
ENSG00000136492	-1.13128	2.78404e-05	0.00111522	BRIP1	down
ENSG00000106153	-0.911991	2.83459e-05	0.00112156	CHCHD2	down
ENSG00000173113	-0.867512	2.82809e-05	0.00112156	TRMT112	down
ENSG00000164919	-1.06807	2.83577e-05	0.00112156	COX6C	down
ENSG00000125347	1.76154	2.81184e-05	0.00112156	IRF1	up
ENSG00000163536	-1.14753	2.8712e-05	0.00113199	SERPINI1	down
ENSG00000167283	-0.992236	2.90294e-05	0.00114091	ATP5MG	down
ENSG00000184445	-0.909872	2.9611e-05	0.00115977	KNTC1	down
ENSG00000118257	0.870891	2.96948e-05	0.00115977	NRP2	up
ENSG00000083799	1.19096	3.00867e-05	0.00117141	CYLD	up
ENSG00000065328	-1.32087	3.04132e-05	0.00118045	MCM10	down
ENSG00000137825	-1.48526	3.08901e-05	0.00119525	ITPKA	down
ENSG00000071539	-1.3493	3.11338e-05	0.00120096	TRIP13	down
ENSG00000118263	1.16958	3.22224e-05	0.00123913	KLF7	up
ENSG00000188229	-1.15029	3.32211e-05	0.00126831	TUBB4B	down
ENSG00000184076	-0.932014	3.32857e-05	0.00126831	UQCR10	down
ENSG00000144583	1.18291	3.32313e-05	0.00126831	2024-03-04	up
ENSG00000166845	-1.09229	3.35389e-05	0.00127407	C18orf54	down
ENSG00000101945	-1.26179	3.3742e-05	0.0012779	SUV39H1	down
ENSG00000104415	-1.23444	3.44617e-05	0.00129979	WISP1	down
ENSG00000100142	-0.879761	3.45281e-05	0.00129979	POLR2F	down
ENSG00000127423	-1.60351	3.50035e-05	0.00131373	AUNIP	down
ENSG00000006625	-0.90914	3.54021e-05	0.00132076	GGCT	down
ENSG00000159147	-1.08932	3.53415e-05	0.00132076	DONSON	down
ENSG00000136010	0.8908	3.59442e-05	0.00133699	ALDH1L2	up
ENSG00000178209	0.833691	3.65438e-05	0.00135527	PLEC	up
ENSG00000167900	-1.46697	3.72902e-05	0.00137885	TK1	down
ENSG00000168393	-1.09124	3.78819e-05	0.0013966	DTYMK	down
ENSG00000135451	-1.45479	3.8147e-05	0.00140224	TROAP	down
ENSG00000196187	1.02968	3.8519e-05	0.00141176	TMEM63A	up
ENSG00000162607	-0.855191	3.89133e-05	0.00142204	USP1	down
ENSG00000168298	-2.10048	3.92883e-05	0.00143156	HIST1H1E	down
ENSG00000169871	1.02069	4.03894e-05	0.0014674	TRIM56	up
ENSG00000169689	-1.0118	4.06727e-05	0.00146962	CENPX	down
ENSG00000136099	1.58362	4.06856e-05	0.00146962	PCDH8	up
ENSG00000142173	0.974836	4.09492e-05	0.00147488	COL6A2	up
ENSG00000160957	-1.03652	4.14498e-05	0.00148862	RECQL4	down
ENSG00000138346	-1.15711	4.16149e-05	0.00149027	DNA2	down
ENSG00000237190	-0.990832	4.21308e-05	0.00150443	CDKN2AIPNL	down
ENSG00000182628	-0.878272	4.26437e-05	0.00151419	SKA2	down
ENSG00000179750	-1.4175	4.26464e-05	0.00151419	APOBEC3B	down
ENSG00000159199	-0.944688	4.3278e-05	0.00152793	ATP5MC1	down
ENSG00000163531	0.972633	4.3225e-05	0.00152793	NFASC	up
ENSG00000144191	1.7805	4.39155e-05	0.00154607	CNGA3	up
ENSG00000125885	-0.900179	4.4781e-05	0.00157212	MCM8	down
ENSG00000164611	-1.45569	4.49766e-05	0.00157456	PTTG1	down
ENSG00000136002	1.02808	4.53364e-05	0.00158272	ARHGEF4	up
ENSG00000088986	-0.810733	4.59346e-05	0.00159629	DYNLL1	down
ENSG00000111678	-0.971342	4.61047e-05	0.00159629	C12orf57	down
ENSG00000178966	-1.17837	4.61083e-05	0.00159629	RMI1	down
ENSG00000170860	-0.938276	4.69416e-05	0.00162065	LSM3	down
ENSG00000099901	-0.984193	4.7214e-05	0.00162199	RANBP1	down
ENSG00000054148	-0.895031	4.73785e-05	0.00162199	PHPT1	down
ENSG00000174839	-1.1054	4.74994e-05	0.00162199	DENND6A	down
ENSG00000115163	-1.68263	4.72645e-05	0.00162199	CENPA	down
ENSG00000134202	-1.04083	4.87553e-05	0.00166034	GSTM3	down
ENSG00000182154	-1.04951	4.91884e-05	0.00167053	MRPL41	down
ENSG00000204922	-1.2608	4.96617e-05	0.00168204	UQCC3	down
ENSG00000174547	-0.985372	5.02342e-05	0.00168771	MRPL11	down
ENSG00000179242	1.04428	5.01884e-05	0.00168771	CDH4	up
ENSG00000031691	-1.20441	5.00006e-05	0.00168771	CENPQ	down
ENSG00000008513	1.27041	5.09912e-05	0.00170855	ST3GAL1	up
ENSG00000117228	5.69888	5.18249e-05	0.00173184	GBP1	up
ENSG00000181804	1.90044	5.26606e-05	0.00175507	SLC9A9	up
ENSG00000124762	-0.927259	5.30789e-05	0.00176431	CDKN1A	down
ENSG00000064687	1.12562	5.33704e-05	0.00176929	ABCA7	up
ENSG00000198546	-1.36264	5.35158e-05	0.00176942	ZNF511	down
ENSG00000174721	-1.14056	5.47764e-05	0.00180632	FGFBP3	down
ENSG00000168159	0.878882	5.50678e-05	0.00181115	RNF187	up
ENSG00000130508	0.89353	5.55207e-05	0.00182125	PXDN	up
ENSG00000134333	-1.15299	5.7096e-05	0.00186803	LDHA	down
ENSG00000150938	0.983032	5.8333e-05	0.00190351	CRIM1	up
ENSG00000184990	-0.912819	5.98801e-05	0.00194891	SIVA1	down
ENSG00000117650	-1.57954	6.06338e-05	0.00196322	NEK2	down
ENSG00000186871	-1.46564	6.04826e-05	0.00196322	ERCC6L	down
ENSG00000133433	-0.936266	6.08079e-05	0.00196377	GSTT2B	down
ENSG00000127922	-0.965353	6.24003e-05	0.00200483	SEM1	down
ENSG00000081870	-1.04353	6.22993e-05	0.00200483	HSPB11	down
ENSG00000135116	1.6008	6.30252e-05	0.00201972	HRK	up
ENSG00000111639	-0.874936	6.37036e-05	0.00203624	MRPL51	down
ENSG00000128228	-1.01979	6.42493e-05	0.00204844	SDF2L1	down
ENSG00000124942	0.876064	6.47194e-05	0.00205817	AHNAK	up
ENSG00000156687	0.916571	6.55712e-05	0.00207997	UNC5D	up
ENSG00000118193	-1.50716	6.61217e-05	0.00208684	KIF14	down
ENSG00000137266	0.987169	6.60215e-05	0.00208684	SLC22A23	up
ENSG00000176771	1.62654	6.6471e-05	0.00209258	NCKAP5	up
ENSG00000166619	1.0926	6.6681e-05	0.00209392	BLCAP	up
ENSG00000166340	0.930804	6.68603e-05	0.00209429	TPP1	up
ENSG00000164163	-0.824171	6.75169e-05	0.00210956	ABCE1	down
ENSG00000005884	1.61671	6.85358e-05	0.00213606	ITGA3	up
ENSG00000146670	-1.25329	6.89933e-05	0.00214497	CDCA5	down
ENSG00000125835	-1.02485	6.9331e-05	0.00215012	SNRPB	down
ENSG00000067064	-0.856358	7.02596e-05	0.00217353	IDI1	down
ENSG00000266714	1.96388	7.14355e-05	0.00220445	MYO15B	up
ENSG00000137310	-1.16408	7.21771e-05	0.00222185	TCF19	down
ENSG00000108448	1.13128	7.34086e-05	0.0022542	TRIM16L	up
ENSG00000124172	-1.01117	7.41174e-05	0.00227039	ATP5F1E	down
ENSG00000116898	-0.861659	7.5154e-05	0.00229651	MRPS15	down
ENSG00000151366	-0.90371	7.60085e-05	0.00231696	NDUFC2	down
ENSG00000130222	2.52404	7.76548e-05	0.00236139	GADD45G	up
ENSG00000008300	1.06371	7.8827e-05	0.00237491	CELSR3	up
ENSG00000125656	-0.86054	7.85463e-05	0.00237491	CLPP	down
ENSG00000159055	-1.16611	7.86795e-05	0.00237491	MIS18A	down
ENSG00000167799	-1.87594	7.88597e-05	0.00237491	NUDT8	down
ENSG00000165480	-1.3457	7.9165e-05	0.00237838	SKA3	down
ENSG00000051341	-1.29007	8.01799e-05	0.00240309	POLQ	down
ENSG00000140443	0.928752	8.18506e-05	0.00244729	IGF1R	up
ENSG00000006576	-0.90225	8.25128e-05	0.00245912	PHTF2	down
ENSG00000168453	2.04672	8.26397e-05	0.00245912	HR	up
ENSG00000237649	-1.30851	8.4098e-05	0.00249657	KIFC1	down
ENSG00000165672	-0.827498	8.47872e-05	0.00251107	PRDX3	down
ENSG00000084207	-0.887443	8.54261e-05	0.00252401	GSTP1	down
ENSG00000197956	2.49657	8.60199e-05	0.00253556	S100A6	up
ENSG00000171159	-0.87893	8.65487e-05	0.00254514	C9orf16	down
ENSG00000204525	1.2045	8.74777e-05	0.00256642	HLA-C	up
ENSG00000093009	-1.29312	8.87933e-05	0.00259892	CDC45	down
ENSG00000129559	-0.889073	9.00035e-05	0.00262819	NEDD8	down
ENSG00000121152	-1.29561	9.16458e-05	0.00266991	NCAPH	down
ENSG00000118418	-0.90072	9.22921e-05	0.00268248	HMGN3	down
ENSG00000140365	-0.972023	9.27901e-05	0.0026907	COMMD4	down
ENSG00000142871	1.59996	9.43754e-05	0.00273033	CYR61	up
ENSG00000186951	0.974968	9.71345e-05	0.00280366	PPARA	up
ENSG00000117395	-0.851605	9.81827e-05	0.00282739	EBNA1BP2	down
ENSG00000108306	1.03054	9.86044e-05	0.00283301	FBXL20	up
ENSG00000167747	-1.02096	9.94129e-05	0.00284648	C19orf48	down
ENSG00000197903	1.05683	9.95288e-05	0.00284648	HIST1H2BK	up
ENSG00000149929	-1.15437	9.98319e-05	0.00284863	HIRIP3	down
ENSG00000141698	-0.839466	0.000100554	0.0028627	NT5C3B	down
ENSG00000188612	-0.831493	0.000101807	0.00289177	SUMO2	down
ENSG00000166337	-1.06428	0.000102291	0.00289894	TAF10	down
ENSG00000168137	0.789881	0.000103766	0.00292746	SETD5	up
ENSG00000115539	-1.04616	0.000103745	0.00292746	PDCL3	down
ENSG00000134330	-1.003	0.000104106	0.00292817	IAH1	down
ENSG00000175197	1.05506	0.000104259	0.00292817	DDIT3	up
ENSG00000115159	-0.86801	0.000104517	0.00292881	GPD2	down
ENSG00000064300	1.75003	0.000104769	0.0029293	NGFR	up
ENSG00000164032	-1.07244	0.000106579	0.00297327	H2AFZ	down
ENSG00000165916	-0.814857	0.000107496	0.00298552	PSMC3	down
ENSG00000155368	-0.957915	0.000107387	0.00298552	DBI	down
ENSG00000157456	-1.37982	0.000107957	0.00299169	CCNB2	down
ENSG00000182481	-1.06348	0.000108368	0.00299641	KPNA2	down
ENSG00000132716	0.972395	0.000108767	0.00300083	DCAF8	up
ENSG00000169738	-0.904948	0.000110218	0.00303414	DCXR	down
ENSG00000123485	-1.24165	0.000113055	0.00310143	HJURP	down
ENSG00000104147	-1.37166	0.000113158	0.00310143	OIP5	down
ENSG00000175334	-0.813457	0.000113523	0.00310461	BANF1	down
ENSG00000161513	-1.20789	0.00011533	0.00314715	FDXR	down
ENSG00000097046	-0.887839	0.000115802	0.00315316	CDC7	down
ENSG00000126775	0.948874	0.000116321	0.00316039	ATG14	up
ENSG00000113328	-0.928276	0.000116828	0.00316728	CCNG1	down
ENSG00000132646	-1.00277	0.000117925	0.00318665	PCNA	down
ENSG00000151465	-0.846665	0.000118052	0.00318665	CDC123	down
ENSG00000169230	-0.857517	0.0001212	0.00326456	PRELID1	down
ENSG00000110436	1.78023	0.000121997	0.00327895	SLC1A2	up
ENSG00000164050	0.859574	0.000123584	0.00330034	PLXNB1	up
ENSG00000163945	1.02455	0.000123152	0.00330034	UVSSA	up
ENSG00000014138	-1.1782	0.000123563	0.00330034	POLA2	down
ENSG00000107223	-0.771549	0.000125655	0.00334847	EDF1	down
ENSG00000107537	-0.906666	0.000126087	0.00335284	PHYH	down
ENSG00000099256	-0.88343	0.000127197	0.00336091	PRTFDC1	down
ENSG00000163006	-1.06601	0.000126961	0.00336091	CCDC138	down
ENSG00000150347	1.25696	0.000127194	0.00336091	ARID5B	up
ENSG00000141994	-0.87647	0.000127725	0.00336775	DUS3L	down
ENSG00000105849	-1.04143	0.000130775	0.0034409	TWISTNB	down
ENSG00000014641	-0.799734	0.000132013	0.00345167	MDH1	down
ENSG00000198756	0.820672	0.000131981	0.00345167	COLGALT2	up
ENSG00000154839	-1.38851	0.000131829	0.00345167	SKA1	down
ENSG00000186193	-1.13794	0.000135305	0.00353036	SAPCD2	down
ENSG00000182117	-0.837561	0.000136928	0.00355784	NOP10	down
ENSG00000169607	-1.32058	0.000136754	0.00355784	CKAP2L	down
ENSG00000121671	0.940971	0.000137322	0.00356067	CRY2	up
ENSG00000145604	-0.967939	0.000138097	0.00357336	SKP2	down
ENSG00000108679	0.937415	0.000139581	0.00360429	LGALS3BP	up
ENSG00000122565	-0.775726	0.000140138	0.00361123	CBX3	down
ENSG00000109390	-0.966919	0.000141535	0.00363971	NDUFC1	down
ENSG00000135446	-0.803113	0.000143983	0.00368852	CDK4	down
ENSG00000076716	1.04712	0.000144479	0.00368852	GPC4	up
ENSG00000126453	-0.920484	0.000144908	0.00368852	BCL2L12	down
ENSG00000080839	-1.06024	0.000144676	0.00368852	RBL1	down
ENSG00000010030	3.12131	0.000144057	0.00368852	ETV7	up
ENSG00000132109	1.72271	0.0001465	0.00372146	TRIM21	up
ENSG00000182004	-0.899493	0.00014832	0.00376006	SNRPE	down
ENSG00000187634	3.00416	0.000150748	0.00381386	SAMD11	up
ENSG00000181163	-0.773002	0.000151787	0.00383239	NPM1	down
ENSG00000156876	-1.10951	0.000152882	0.00385225	SASS6	down
ENSG00000167815	-0.833051	0.000153726	0.00385796	PRDX2	down
ENSG00000161800	-1.22595	0.000153622	0.00385796	RACGAP1	down
ENSG00000142945	-1.29146	0.000155359	0.00389113	KIF2C	down
ENSG00000153094	1.14615	0.000157354	0.00393322	BCL2L11	up
ENSG00000090889	-1.20161	0.000158973	0.00394998	KIF4A	down
ENSG00000105185	-0.843092	0.000158634	0.00394998	PDCD5	down
ENSG00000188483	-1.01329	0.000158701	0.00394998	IER5L	down
ENSG00000134369	0.989806	0.000160559	0.00398147	NAV1	up
ENSG00000124562	-0.810519	0.000164595	0.00407349	SNRPC	down
ENSG00000142507	-0.825816	0.000165581	0.00408978	PSMB6	down
ENSG00000082212	-0.831694	0.00016607	0.00409378	ME2	down
ENSG00000163170	-1.03728	0.000167183	0.0041131	BOLA3	down
ENSG00000164105	-1.01659	0.000167963	0.00412417	SAP30	down
ENSG00000143878	0.76786	0.000168765	0.00413574	RHOB	up
ENSG00000146950	-0.817032	0.000171761	0.00419822	SHROOM2	down
ENSG00000165501	-1.07071	0.000171987	0.00419822	LRR1	down
ENSG00000085999	-1.29389	0.000172836	0.00421072	RAD54L	down
ENSG00000119185	-0.908566	0.000173626	0.00422175	ITGB1BP1	down
ENSG00000077312	-1.00651	0.000174061	0.00422411	SNRPA	down
ENSG00000163781	-0.836642	0.000175339	0.00424688	TOPBP1	down
ENSG00000119705	-0.880067	0.000176336	0.00426196	SLIRP	down
ENSG00000102007	-0.895373	0.000176644	0.00426196	PLP2	down
ENSG00000139636	0.973348	0.000178475	0.00428536	LMBR1L	up
ENSG00000176208	-1.01289	0.000178643	0.00428536	ATAD5	down
ENSG00000106404	1.00692	0.00017846	0.00428536	CLDN15	up
ENSG00000176014	-0.957798	0.000179663	0.00430158	TUBB6	down
ENSG00000156587	1.21451	0.000181994	0.00434077	UBE2L6	up
ENSG00000104112	1.07303	0.000181792	0.00434077	SCG3	up
ENSG00000134057	-1.32566	0.000186276	0.004426	CCNB1	down
ENSG00000133302	-1.2413	0.000186207	0.004426	SLF1	down
ENSG00000146674	3.25642	0.000187525	0.00444722	IGFBP3	up
ENSG00000130294	1.46716	0.000187979	0.00444955	KIF1A	up
ENSG00000159388	0.773236	0.000190284	0.00448711	BTG2	up
ENSG00000063015	1.54604	0.000190241	0.00448711	SEZ6	up
ENSG00000172037	0.827637	0.000191066	0.00449706	LAMB2	up
ENSG00000139514	0.831213	0.000191649	0.0045023	SLC7A1	up
ENSG00000064651	-0.912315	0.000192546	0.00451489	SLC12A2	down
ENSG00000196526	0.803894	0.000193323	0.00452463	AFAP1	up
ENSG00000085662	-0.936288	0.000198699	0.00464175	AKR1B1	down
ENSG00000153310	-0.774691	0.000203293	0.00474023	FAM49B	down
ENSG00000113810	-0.840265	0.000204263	0.00475398	SMC4	down
ENSG00000197746	0.881264	0.000213003	0.00492982	PSAP	up
ENSG00000177889	-0.773728	0.000212997	0.00492982	UBE2N	down
ENSG00000166181	-0.876657	0.000212692	0.00492982	API5	down
ENSG00000091129	0.970845	0.000214132	0.00494681	NRCAM	up
ENSG00000146278	0.935332	0.000215832	0.00497687	PNRC1	up
ENSG00000141552	-0.869918	0.000216544	0.0049841	ANAPC11	down
ENSG00000074071	-0.815212	0.000219856	0.00505103	MRPS34	down
ENSG00000221983	-0.866345	0.000220858	0.00506446	UBA52	down
ENSG00000185189	0.849986	0.000221251	0.00506446	NRBP2	up
ENSG00000128159	0.892798	0.000222765	0.00508979	TUBGCP6	up
ENSG00000090861	0.941274	0.000224403	0.00511786	AARS	up
ENSG00000090615	0.764825	0.00022735	0.00516622	GOLGA3	up
ENSG00000139343	-0.865594	0.000226953	0.00516622	SNRPF	down
ENSG00000111206	-1.27237	0.000229669	0.00520944	FOXM1	down
ENSG00000224877	-0.967616	0.000230729	0.00522401	NDUFAF8	down
ENSG00000072506	-0.807416	0.000231737	0.00523735	HSD17B10	down
ENSG00000139579	-0.784504	0.000233288	0.00526287	NABP2	down
ENSG00000205544	-1.28477	0.000234234	0.0052747	TMEM256	down
ENSG00000169302	1.10757	0.000235017	0.00528281	STK32A	up
ENSG00000175602	-0.924744	0.000236157	0.00529891	CCDC85B	down
ENSG00000127184	-0.849744	0.000236597	0.00529925	COX7C	down
ENSG00000124225	1.2223	0.000238813	0.00533933	PMEPA1	up
ENSG00000154146	-1.52874	0.000239799	0.0053518	NRGN	down
ENSG00000188312	-1.38624	0.000241029	0.00536967	CENPP	down
ENSG00000107742	0.986428	0.00024293	0.00540237	SPOCK2	up
ENSG00000162490	1.45472	0.000246137	0.00546399	DRAXIN	up
ENSG00000111445	-0.993781	0.000249364	0.00552581	RFC5	down
ENSG00000162298	0.821024	0.000252027	0.00557492	SYVN1	up
ENSG00000228716	-1.08364	0.000254317	0.00561565	DHFR	down
ENSG00000184194	1.1815	0.000255137	0.00562382	GPR173	up
ENSG00000274750	1.852	0.000255932	0.00563141	HIST1H3E	up
ENSG00000109819	1.44515	0.000256606	0.0056363	PPARGC1A	up
ENSG00000149294	0.868224	0.000257299	0.00564161	NCAM1	up
ENSG00000140988	-0.896841	0.000262348	0.00572912	RPS2	down
ENSG00000172922	-0.821002	0.000262665	0.00572912	RNASEH2C	down
ENSG00000146263	-0.977034	0.000261916	0.00572912	MMS22L	down
ENSG00000129244	1.03871	0.000264663	0.0057445	ATP1B2	up
ENSG00000185480	-1.20105	0.000264328	0.0057445	PARPBP	down
ENSG00000275713	-1.43682	0.000264749	0.0057445	HIST1H2BH	down
ENSG00000100749	-0.943239	0.000268933	0.00582518	VRK1	down
ENSG00000146540	-0.760348	0.000270618	0.00584143	C7orf50	down
ENSG00000070540	1.16113	0.000270242	0.00584143	WIPI1	up
ENSG00000147471	-0.775229	0.000271936	0.00585976	PLPBP	down
ENSG00000175274	-0.759238	0.000272433	0.00586035	TP53I11	down
ENSG00000127481	0.734086	0.000273891	0.0058816	UBR4	up
ENSG00000165629	-0.768415	0.00027748	0.00593826	ATP5F1C	down
ENSG00000174917	-0.832914	0.000277174	0.00593826	C19orf70	down
ENSG00000113269	-0.83672	0.000280013	0.00598222	RNF130	down
ENSG00000130584	1.18903	0.000285079	0.00608007	ZBTB46	up
ENSG00000173660	-0.854397	0.000288222	0.00609391	UQCRH	down
ENSG00000235162	-0.977029	0.000286578	0.00609391	C12orf75	down
ENSG00000123685	-0.966049	0.000288654	0.00609391	BATF3	down
ENSG00000109674	-1.31537	0.000287642	0.00609391	NEIL3	down
ENSG00000073910	1.15166	0.000288513	0.00609391	FRY	up
ENSG00000269720	4.86987	0.000287363	0.00609391	CCDC194	up
ENSG00000107249	1.03011	0.000290477	0.00612206	GLIS3	up
ENSG00000001630	-0.964019	0.000292831	0.00616128	CYP51A1	down
ENSG00000116120	-0.818046	0.000295026	0.00619702	FARSB	down
ENSG00000140939	-0.955619	0.000300937	0.00631059	NOL3	down
ENSG00000075218	-1.26727	0.000303145	0.00634624	GTSE1	down
ENSG00000135766	-0.798687	0.000305206	0.0063787	EGLN1	down
ENSG00000079482	0.911098	0.000311218	0.0064935	OPHN1	up
ENSG00000111231	-0.946718	0.000313075	0.00652134	GPN3	down
ENSG00000187514	-0.814692	0.000314712	0.00654454	PTMA	down
ENSG00000103342	-0.76256	0.000315506	0.00655016	GSPT1	down
ENSG00000092758	-0.757715	0.00031667	0.00655255	COL9A3	down
ENSG00000169567	-0.867829	0.000316602	0.00655255	HINT1	down
ENSG00000007174	0.97465	0.000317474	0.00655833	DNAH9	up
ENSG00000117500	-0.853038	0.000319015	0.00657929	TMED5	down
ENSG00000165410	-0.804287	0.000322706	0.00664444	CFL2	down
ENSG00000138385	-0.750947	0.000328103	0.00673339	SSB	down
ENSG00000123219	-1.10549	0.00032766	0.00673339	CENPK	down
ENSG00000089006	-0.737795	0.000331294	0.00678772	SNX5	down
ENSG00000185630	1.10556	0.000332493	0.00680114	PBX1	up
ENSG00000013523	0.827259	0.000343218	0.00700906	ANGEL1	up
ENSG00000130312	-0.815368	0.000345169	0.00701006	MRPL34	down
ENSG00000122376	-0.93833	0.000345162	0.00701006	SHLD2	down
ENSG00000131351	-1.02171	0.000345511	0.00701006	HAUS8	down
ENSG00000116329	1.15911	0.000344451	0.00701006	OPRD1	up
ENSG00000168496	-1.0282	0.000349783	0.0070707	FEN1	down
ENSG00000197905	-0.960216	0.000349637	0.0070707	TEAD4	down
ENSG00000184260	-1.25276	0.000350197	0.0070707	HIST2H2AC	down
ENSG00000167553	-0.885498	0.000351429	0.00708413	TUBA1C	down
ENSG00000169679	-1.18762	0.00035444	0.00713332	BUB1	down
ENSG00000011021	0.83373	0.000363483	0.00730356	CLCN6	up
ENSG00000172531	-0.750733	0.000364979	0.00731207	PPP1CA	down
ENSG00000178295	-1.02393	0.000365077	0.00731207	GEN1	down
ENSG00000169976	-0.801301	0.000367264	0.00733237	SF3B5	down
ENSG00000162385	-0.942454	0.000366879	0.00733237	MAGOH	down
ENSG00000077063	1.13289	0.000368385	0.00734303	CTTNBP2	up
ENSG00000127603	0.696337	0.000369063	0.00734482	MACF1	up
ENSG00000177917	-0.866177	0.000372873	0.00740885	ARL6IP6	down
ENSG00000183684	-0.845964	0.000373819	0.00741586	ALYREF	down
ENSG00000179271	-0.723872	0.000377265	0.00747236	GADD45GIP1	down
ENSG00000166226	-0.74456	0.000378278	0.00748057	CCT2	down
ENSG00000169299	-0.841258	0.000379541	0.00749369	PGM2	down
ENSG00000166986	0.747365	0.000381112	0.00751283	MARS	up
ENSG00000196465	-0.781426	0.000384011	0.00755806	MYL6B	down
ENSG00000175756	-0.740466	0.00038769	0.00761848	AURKAIP1	down
ENSG00000123473	-0.957955	0.000390144	0.00762848	STIL	down
ENSG00000144554	-1.16862	0.000390641	0.00762848	FANCD2	down
ENSG00000166823	-1.35472	0.0003899	0.00762848	MESP1	down
ENSG00000276903	-3.32248	0.000389818	0.00762848	HIST1H2AL	down
ENSG00000131018	1.1089	0.000391835	0.00763987	SYNE1	up
ENSG00000154518	-0.90222	0.000393104	0.00765005	ATP5MC3	down
ENSG00000108384	-0.868589	0.000393827	0.00765005	RAD51C	down
ENSG00000135299	2.01979	0.000394194	0.00765005	ANKRD6	up
ENSG00000125445	-0.773114	0.000399926	0.00774926	MRPS7	down
ENSG00000167106	0.860746	0.000408625	0.00790556	FAM102A	up
ENSG00000138018	-0.785181	0.000418905	0.00809193	SELENOI	down
ENSG00000133265	-0.81059	0.000419813	0.00809694	HSPBP1	down
ENSG00000107798	-0.83099	0.000421345	0.00811398	LIPA	down
ENSG00000174871	-1.05557	0.000423264	0.00813839	CNIH2	down
ENSG00000088854	0.939595	0.000425016	0.00815952	C20orf194	up
ENSG00000166595	-0.87398	0.000433849	0.00831633	CIAO2B	down
ENSG00000172115	-0.706189	0.000435786	0.00833801	CYCS	down
ENSG00000174371	-1.13736	0.000436314	0.00833801	EXO1	down
ENSG00000070785	-0.807553	0.000437049	0.00833929	EIF2B3	down
ENSG00000116288	-0.748065	0.00043893	0.00836243	PARK7	down
ENSG00000111669	-0.844414	0.000440254	0.00837488	TPI1	down
ENSG00000100387	-0.795916	0.000444063	0.00843449	RBX1	down
ENSG00000158042	-0.735816	0.00044648	0.00844343	MRPL17	down
ENSG00000143222	-0.830406	0.000447911	0.00844343	UFC1	down
ENSG00000204220	-1.0199	0.000447758	0.00844343	PFDN6	down
ENSG00000156787	-0.92944	0.000446967	0.00844343	TBC1D31	down
ENSG00000213347	-1.51415	0.000445866	0.00844343	MXD3	down
ENSG00000100028	-0.75272	0.000448732	0.00844616	SNRPD3	down
ENSG00000139269	1.5114	0.00045074	0.00847119	INHBE	up
ENSG00000073614	0.757465	0.00045384	0.0084849	KDM5A	up
ENSG00000182010	-1.28068	0.000452399	0.0084849	RTKN2	down
ENSG00000073331	1.16044	0.000454184	0.0084849	ALPK1	up
ENSG00000102554	1.5814	0.000454025	0.0084849	KLF5	up
ENSG00000120708	1.29697	0.000459778	0.00857657	TGFBI	up
ENSG00000156804	1.59341	0.000462489	0.00861429	FBXO32	up
ENSG00000148730	-0.713599	0.000463798	0.0086175	EIF4EBP2	down
ENSG00000130703	0.870803	0.00046404	0.0086175	OSBPL2	up
ENSG00000100918	2.03637	0.000464731	0.00861752	REC8	up
ENSG00000109919	-0.749074	0.000467042	0.00864755	MTCH2	down
ENSG00000148459	-1.16395	0.000473106	0.00874687	PDSS1	down
ENSG00000053371	-0.848031	0.000477557	0.0088031	AKR7A2	down
ENSG00000054219	1.90749	0.000476989	0.0088031	LY75	up
ENSG00000173915	-0.884506	0.000482467	0.00888051	ATP5MD	down
ENSG00000188186	-0.759485	0.000490405	0.00901335	LAMTOR4	down
ENSG00000128944	-1.10203	0.000493394	0.00905497	KNSTRN	down
ENSG00000145741	-0.71176	0.000495318	0.00907696	BTF3	down
ENSG00000120278	0.834445	0.000496356	0.00908265	PLEKHG1	up
ENSG00000111581	-0.7386	0.000498136	0.0091019	NUP107	down
ENSG00000172172	-0.872047	0.000501955	0.00915829	MRPL13	down
ENSG00000066135	0.778345	0.00050359	0.00917473	KDM4A	up
ENSG00000177807	1.07411	0.000506353	0.00921164	KCNJ10	up
ENSG00000169139	-0.809593	0.00051225	0.00930537	UBE2V2	down
ENSG00000134291	-0.927418	0.000515566	0.00933847	TMEM106C	down
ENSG00000124177	0.852891	0.000515304	0.00933847	CHD6	up
ENSG00000064393	0.735114	0.000519037	0.00938773	HIPK2	up
ENSG00000244405	0.705987	0.000524259	0.00943535	ETV5	up
ENSG00000071242	0.801063	0.000527623	0.00943535	RPS6KA2	up
ENSG00000149177	0.719005	0.000526345	0.00943535	PTPRJ	up
ENSG00000170906	-0.80686	0.000524618	0.00943535	NDUFA3	down
ENSG00000157613	1.06712	0.000527709	0.00943535	CREB3L1	up
ENSG00000186866	0.862701	0.000523026	0.00943535	POFUT2	up
ENSG00000163820	0.965648	0.000527066	0.00943535	FYCO1	up
ENSG00000177108	1.56105	0.000527186	0.00943535	ZDHHC22	up
ENSG00000111142	-0.835901	0.000531018	0.00946743	METAP2	down
ENSG00000241837	-0.841696	0.000530645	0.00946743	ATP5PO	down
ENSG00000235568	2.20458	0.000532027	0.00947189	NFAM1	up
ENSG00000164574	0.775182	0.000533889	0.00949153	GALNT10	up
ENSG00000005022	-0.998169	0.000539894	0.0095734	SLC25A5	down
ENSG00000065057	-0.98364	0.000540026	0.0095734	NTHL1	down
ENSG00000232112	-0.914931	0.000543545	0.00962213	TMA7	down
ENSG00000138316	1.30053	0.000546654	0.00966348	ADAMTS14	up
ENSG00000125901	-0.863565	0.000552642	0.00973903	MRPS26	down
ENSG00000177000	0.809316	0.000552551	0.00973903	MTHFR	up
ENSG00000197696	-1.10391	0.000553266	0.00973903	NMB	down
ENSG00000118181	-0.831513	0.000559745	0.00983924	RPS25	down
ENSG00000126067	-0.751709	0.000562281	0.00986328	PSMB2	down
ENSG00000196584	-1.01175	0.00056427	0.00986328	XRCC2	down
ENSG00000131196	1.13029	0.000564035	0.00986328	NFATC1	up
ENSG00000060656	2.70626	0.000563276	0.00986328	PTPRU	up
ENSG00000128626	-0.830593	0.000568279	0.00991948	MRPS12	down
ENSG00000145214	0.99978	0.000571349	0.00995917	DGKQ	up
ENSG00000130520	-0.836824	0.000572759	0.00996983	LSM4	down
ENSG00000123983	-0.692174	0.000574336	0.00998337	ACSL3	down
ENSG00000114978	-0.719525	0.000575922	0.00999704	MOB1A	down
ENSG00000148926	-1.01053	0.000578743	0.0100321	ADM	down
ENSG00000186648	1.0889	0.000581611	0.0100678	CARMIL3	up
ENSG00000105379	-0.965935	0.000590033	0.0101995	ETFB	down
ENSG00000132507	-0.789236	0.000592633	0.0102303	EIF5A	down
ENSG00000214026	-0.788046	0.00059767	0.010303	MRPL23	down
ENSG00000132475	-0.667604	0.000607491	0.0104358	H3F3B	down
ENSG00000109881	-0.789806	0.000607877	0.0104358	CCDC34	down
ENSG00000206432	1.28631	0.000607521	0.0104358	TMEM200C	up
ENSG00000134825	-0.752638	0.000613015	0.0105096	TMEM258	down
ENSG00000064309	0.954904	0.000615022	0.0105187	CDON	up
ENSG00000124813	2.05214	0.000615234	0.0105187	RUNX2	up
ENSG00000220205	0.826926	0.000619688	0.0105804	VAMP2	up
ENSG00000111880	-0.890607	0.00062152	0.0105972	RNGTT	down
ENSG00000103363	-0.711587	0.000624451	0.0106182	ELOB	down
ENSG00000166311	-0.931768	0.000623753	0.0106182	SMPD1	down
ENSG00000174738	1.01464	0.000631653	0.0107261	NR1D2	up
ENSG00000167775	-0.91074	0.000634334	0.010757	CD320	down
ENSG00000167088	-0.736018	0.000642949	0.0108736	SNRPD1	down
ENSG00000170364	-1.11759	0.000642278	0.0108736	SETMAR	down
ENSG00000164877	1.06045	0.000644435	0.010884	MICALL2	up
ENSG00000165861	0.800067	0.000648927	0.0109199	ZFYVE1	up
ENSG00000169136	1.06663	0.000649181	0.0109199	ATF5	up
ENSG00000149809	-0.739604	0.000648166	0.0109199	TM7SF2	down
ENSG00000276180	1.17865	0.000651179	0.0109388	HIST1H4I	up
ENSG00000064042	0.761873	0.000657776	0.0110347	LIMCH1	up
ENSG00000101057	-1.12801	0.000660439	0.0110646	MYBL2	down
ENSG00000167645	-0.809218	0.000661824	0.0110729	YIF1B	down
ENSG00000179958	-1.01407	0.000667044	0.0111453	DCTPP1	down
ENSG00000214114	-1.07724	0.000674592	0.0112564	MYCBP	down
ENSG00000146066	-0.904703	0.000680519	0.0113402	HIGD2A	down
ENSG00000181035	1.0691	0.000685779	0.0114126	SLC25A42	up
ENSG00000198931	-0.819856	0.00068693	0.0114166	APRT	down
ENSG00000155115	-0.792918	0.00069164	0.0114724	GTF3C6	down
ENSG00000122574	1.08141	0.000692127	0.0114724	WIPF3	up
ENSG00000181544	-1.45	0.000703483	0.0116452	FANCB	down
ENSG00000116670	-0.802652	0.000713027	0.0117725	MAD2L2	down
ENSG00000141526	-1.14892	0.000713058	0.0117725	SLC16A3	down
ENSG00000183520	-0.753061	0.000718534	0.0118431	UTP11	down
ENSG00000139364	0.81954	0.00071989	0.0118431	TMEM132B	up
ENSG00000178999	-1.24258	0.000720619	0.0118431	AURKB	down
ENSG00000198056	-1.14275	0.000721124	0.0118431	PRIM1	down
ENSG00000073111	-0.999071	0.000722893	0.011846	MCM2	down
ENSG00000157542	1.08805	0.000723193	0.011846	KCNJ6	up
ENSG00000140534	-0.889617	0.000726768	0.0118734	TICRR	down
ENSG00000152455	-0.932216	0.000726387	0.0118734	SUV39H2	down
ENSG00000172336	-0.833343	0.000728879	0.0118837	POP7	down
ENSG00000152253	-1.32641	0.00072969	0.0118837	SPC25	down
ENSG00000213928	2.06157	0.00073025	0.0118837	IRF9	up
ENSG00000008083	0.871193	0.000743158	0.012078	JARID2	up
ENSG00000026508	1.00189	0.000744371	0.012082	CD44	up
ENSG00000130731	-0.795733	0.000752069	0.0121596	METTL26	down
ENSG00000182551	-0.849247	0.000751325	0.0121596	ADI1	down
ENSG00000187266	0.944296	0.000751507	0.0121596	EPOR	up
ENSG00000130827	0.744529	0.000755438	0.0121983	PLXNA3	up
ENSG00000206527	-0.790816	0.000757911	0.0122067	HACD2	down
ENSG00000100744	-0.89492	0.000757131	0.0122067	GSKIP	down
ENSG00000161888	-1.30693	0.000762004	0.0122568	SPC24	down
ENSG00000143621	-0.733257	0.000766761	0.0123152	ILF2	down
ENSG00000185347	-0.848111	0.000767605	0.0123152	TEDC1	down
ENSG00000049541	-0.865972	0.000778669	0.0124448	RFC2	down
ENSG00000242485	-0.721017	0.000778595	0.0124448	MRPL20	down
ENSG00000135063	2.96125	0.000776729	0.0124448	FAM189A2	up
ENSG00000136810	-0.729435	0.000784322	0.0125191	TXN	down
ENSG00000165264	-0.863944	0.000793301	0.0126463	NDUFB6	down
ENSG00000166797	-0.83584	0.000795184	0.0126601	CIAO2A	down
ENSG00000127564	-1.2593	0.000802273	0.0127568	PKMYT1	down
ENSG00000124222	0.769467	0.000803464	0.0127595	STX16	up
ENSG00000095303	1.45781	0.000806251	0.0127875	PTGS1	up
ENSG00000005059	-0.709809	0.000810561	0.0128392	MCUB	down
ENSG00000135045	-1.0298	0.000811569	0.0128392	C9orf40	down
ENSG00000165476	-0.783756	0.000814083	0.0128601	REEP3	down
ENSG00000128059	-0.834255	0.000815977	0.0128601	PPAT	down
ENSG00000129646	1.48722	0.000815205	0.0128601	QRICH2	up
ENSG00000164070	-0.837855	0.000818701	0.0128868	HSPA4L	down
ENSG00000108309	1.24248	0.000821216	0.0128953	RUNDC3A	up
ENSG00000109062	-0.976813	0.000821306	0.0128953	SLC9A3R1	down
ENSG00000133318	-0.763794	0.000828634	0.0129941	RTN3	down
ENSG00000186480	-0.779934	0.000834585	0.013071	INSIG1	down
ENSG00000160256	-0.884575	0.000841265	0.0131591	FAM207A	down
ENSG00000183814	-0.907267	0.000843615	0.0131794	LIN9	down
ENSG00000152944	-0.885501	0.000847649	0.0132259	MED21	down
ENSG00000158106	0.796122	0.000853346	0.0132982	RHPN1	up
ENSG00000148204	4.17011	0.000865656	0.0134732	CRB2	up
ENSG00000119682	0.731144	0.000867014	0.0134775	AREL1	up
ENSG00000091651	-0.900298	0.000872476	0.0135456	ORC6	down
ENSG00000143761	-0.731459	0.000879489	0.013603	ARF1	down
ENSG00000144136	-0.751965	0.000879535	0.013603	SLC20A1	down
ENSG00000091317	-0.755652	0.000879073	0.013603	CMTM6	down
ENSG00000101347	1.08862	0.000880526	0.013603	SAMHD1	up
ENSG00000231925	0.800049	0.000891676	0.0137297	TAPBP	up
ENSG00000153551	-0.969119	0.000892027	0.0137297	CMTM7	down
ENSG00000179698	2.92358	0.000891447	0.0137297	WDR97	up
ENSG00000033627	0.680676	0.000904351	0.0138783	ATP6V0A1	up
ENSG00000197077	0.843853	0.000905013	0.0138783	KIAA1671	up
ENSG00000119632	-0.867553	0.000904314	0.0138783	IFI27L2	down
ENSG00000033867	-0.752849	0.000910416	0.0139441	SLC4A7	down
ENSG00000125814	0.94352	0.0009151	0.0139964	NAPB	up
ENSG00000006025	1.11108	0.000916073	0.0139964	OSBPL7	up
ENSG00000165029	1.67362	0.000920848	0.0140522	ABCA1	up
ENSG00000138829	3.38234	0.000923016	0.0140681	FBN2	up
ENSG00000173486	-0.755892	0.000930712	0.0141561	FKBP2	down
ENSG00000168010	0.976914	0.000931053	0.0141561	ATG16L2	up
ENSG00000106049	-0.821744	0.000938207	0.0142475	HIBADH	down
ENSG00000101182	-0.707026	0.000957793	0.0145273	PSMA7	down
ENSG00000000460	-1.05287	0.000962301	0.014578	C1orf112	down
ENSG00000139684	-0.723462	0.000971475	0.0146991	ESD	down
ENSG00000105856	0.818742	0.00097628	0.014754	HBP1	up
ENSG00000114686	-0.689678	0.000980127	0.0147746	MRPL3	down
ENSG00000178741	-0.7588	0.000980336	0.0147746	COX5A	down
ENSG00000152527	1.00716	0.000981438	0.0147746	PLEKHH2	up
ENSG00000166171	-1.04568	0.00098237	0.0147746	DPCD	down
ENSG00000146731	-0.670511	0.000992607	0.014844	CCT6A	down
ENSG00000115875	-0.669025	0.000989464	0.014844	SRSF7	down
ENSG00000181924	-0.692185	0.000990131	0.014844	COA4	down
ENSG00000106327	-1.02987	0.000992819	0.014844	TFR2	down
ENSG00000189171	-0.881511	0.000992924	0.014844	S100A13	down
ENSG00000135862	0.669215	0.00100605	0.014933	LAMC1	up
ENSG00000142230	-0.722129	0.00100539	0.014933	SAE1	down
ENSG00000146830	0.694473	0.00100177	0.014933	GIGYF1	up
ENSG00000071537	0.688683	0.00100592	0.014933	SEL1L	up
ENSG00000175416	-0.778424	0.00100507	0.014933	CLTB	down
ENSG00000184678	1.21026	0.00100431	0.014933	HIST2H2BE	up
ENSG00000107862	0.727617	0.00100974	0.0149701	GBF1	up
ENSG00000099800	-0.700821	0.00101503	0.0150218	TIMM13	down
ENSG00000184831	-0.934514	0.00101563	0.0150218	APOO	down
ENSG00000138135	1.22111	0.0010295	0.0152088	CH25H	up
ENSG00000141741	-0.857355	0.00103674	0.0152978	MIEN1	down
ENSG00000234745	1.0252	0.00103989	0.015308	HLA-B	up
ENSG00000198198	0.780838	0.00103956	0.015308	SZT2	up
ENSG00000148362	-0.768408	0.0010441	0.015352	PAXX	down
ENSG00000156970	-1.17657	0.00104592	0.0153607	BUB1B	down
ENSG00000091640	-0.778773	0.00104737	0.0153639	SPAG7	down
ENSG00000116161	-0.809452	0.00105817	0.0154839	CACYBP	down
ENSG00000114770	0.874969	0.00105894	0.0154839	ABCC5	up
ENSG00000158109	1.09172	0.00105927	0.0154839	TPRG1L	up
ENSG00000005206	0.753937	0.0010651	0.0155433	SPPL2B	up
ENSG00000111653	0.802657	0.00106582	0.0155433	ING4	up
ENSG00000090339	0.753557	0.00106968	0.0155814	ICAM1	up
ENSG00000163041	-0.670611	0.00107722	0.015673	H3F3A	down
ENSG00000130748	-0.894759	0.00107917	0.0156831	TMEM160	down
ENSG00000198242	-0.734475	0.00108332	0.0157164	RPL23A	down
ENSG00000198721	-0.88812	0.00108523	0.0157164	ECI2	down
ENSG00000100629	-1.07344	0.00108524	0.0157164	CEP128	down
ENSG00000136108	-0.727377	0.00108717	0.0157263	CKAP2	down
ENSG00000115129	-0.856529	0.00109344	0.0157986	TP53I3	down
ENSG00000132294	0.712926	0.0011006	0.0158654	EFR3A	up
ENSG00000166788	-0.804312	0.00109938	0.0158654	SAAL1	down
ENSG00000140836	0.803791	0.00110304	0.0158822	ZFHX3	up
ENSG00000155511	1.34776	0.00110788	0.0159336	GRIA1	up
ENSG00000119801	0.800788	0.00110923	0.0159347	YPEL5	up
ENSG00000187325	-0.772916	0.00111078	0.0159387	TAF9B	down
ENSG00000170515	-0.836005	0.00111624	0.0159987	PA2G4	down
ENSG00000166508	-0.905724	0.00112291	0.0160758	MCM7	down
ENSG00000242372	-0.737699	0.00112817	0.0161326	EIF6	down
ENSG00000139618	-0.998887	0.00112977	0.016137	BRCA2	down
ENSG00000053372	-0.808004	0.00113314	0.0161666	MRTO4	down
ENSG00000143553	-0.859764	0.00113489	0.0161731	SNAPIN	down
ENSG00000147852	0.678751	0.00113779	0.016196	VLDLR	up
ENSG00000182253	0.905124	0.00115033	0.0163558	SYNM	up
ENSG00000071655	-0.698209	0.00115174	0.0163573	MBD3	down
ENSG00000114554	0.676257	0.00115479	0.0163821	PLXNA1	up
ENSG00000120053	0.793349	0.00116024	0.0164407	GOT1	up
ENSG00000130005	-0.979079	0.0011708	0.0165715	GAMT	down
ENSG00000169019	-1.12736	0.00118681	0.0167792	COMMD8	down
ENSG00000087095	0.732489	0.00119014	0.0168025	NLK	up
ENSG00000186376	1.04049	0.00119116	0.0168025	ZNF75D	up
ENSG00000197451	-0.823023	0.0012039	0.016944	HNRNPAB	down
ENSG00000167703	0.903632	0.00120298	0.016944	SLC43A2	up
ENSG00000081041	2.55814	0.00120531	0.0169448	CXCL2	up
ENSG00000167969	-0.797157	0.00121451	0.0170386	ECI1	down
ENSG00000151233	-0.817543	0.00121607	0.0170386	GXYLT1	down
ENSG00000125458	-0.925214	0.00121491	0.0170386	NT5C	down
ENSG00000205581	-0.770971	0.00121815	0.0170473	HMGN1	down
ENSG00000102606	0.683753	0.00122078	0.0170473	ARHGEF7	up
ENSG00000151247	-0.738942	0.00121979	0.0170473	EIF4E	down
ENSG00000277791	-0.700645	0.00122468	0.0170826	PSMB3	down
ENSG00000172500	-0.703193	0.00122676	0.0170926	FIBP	down
ENSG00000148773	-1.02041	0.00123184	0.0171252	MKI67	down
ENSG00000135940	-0.684153	0.00123141	0.0171252	COX5B	down
ENSG00000167528	0.977943	0.00123853	0.017199	ZNF641	up
ENSG00000197461	0.879088	0.00124641	0.0172893	PDGFA	up
ENSG00000147123	-0.72213	0.00125087	0.0173319	NDUFB11	down
ENSG00000172020	-0.650234	0.0012547	0.0173657	GAP43	down
ENSG00000103249	0.754007	0.00126379	0.0174722	CLCN7	up
ENSG00000196419	-0.674155	0.00126945	0.0175187	XRCC6	down
ENSG00000165548	2.09687	0.00126996	0.0175187	TMEM63C	up
ENSG00000186522	-0.844574	0.00127562	0.0175669	2024-09-10	down
ENSG00000173272	-0.960508	0.00127781	0.0175669	MZT2A	down
ENSG00000141540	0.773681	0.00127908	0.0175669	TTYH2	up
ENSG00000020922	-0.783258	0.00127865	0.0175669	MRE11	down
ENSG00000127415	1.05615	0.0012805	0.0175671	IDUA	up
ENSG00000115484	-0.751599	0.00129141	0.0176394	CCT4	down
ENSG00000164211	-0.862022	0.0012878	0.0176394	STARD4	down
ENSG00000147536	-1.07083	0.00129066	0.0176394	GINS4	down
ENSG00000050767	1.54251	0.00128915	0.0176394	COL23A1	up
ENSG00000114423	0.968472	0.00129377	0.0176524	CBLB	up
ENSG00000079616	-0.862516	0.0013079	0.0178257	KIF22	down
ENSG00000042493	-0.843944	0.00130942	0.017827	CAPG	down
ENSG00000213719	-0.662694	0.00131644	0.0179029	CLIC1	down
ENSG00000101361	-0.681964	0.00131963	0.0179269	NOP56	down
ENSG00000105258	-0.858452	0.00134145	0.0182035	POLR2I	down
ENSG00000168002	-0.671437	0.001347	0.018259	POLR2G	down
ENSG00000198176	-0.826326	0.00136471	0.0184791	TFDP1	down
ENSG00000078668	-0.678843	0.00137357	0.0185789	VDAC3	down
ENSG00000147883	0.756407	0.00138197	0.0186723	CDKN2B	up
ENSG00000127445	-0.671286	0.00138979	0.0187576	PIN1	down
ENSG00000131495	-0.929238	0.00139178	0.0187642	NDUFA2	down
ENSG00000211450	-0.680842	0.00139466	0.0187828	SELENOH	down
ENSG00000160753	-0.83689	0.00140403	0.0188279	RUSC1	down
ENSG00000101447	-1.30675	0.00140029	0.0188279	FAM83D	down
ENSG00000100292	1.08923	0.00140292	0.0188279	HMOX1	up
ENSG00000076344	1.05488	0.00140243	0.0188279	RGS11	up
ENSG00000111331	0.964812	0.00140716	0.0188388	OAS3	up
ENSG00000137038	-0.750475	0.00140786	0.0188388	DMAC1	down
ENSG00000198258	-0.713355	0.00141363	0.0188958	UBL5	down
ENSG00000126267	-0.751507	0.00142524	0.0190105	COX6B1	down
ENSG00000152894	0.709223	0.00142526	0.0190105	PTPRK	up
ENSG00000129084	-0.849155	0.0014268	0.0190108	PSMA1	down
ENSG00000203867	1.35108	0.00144287	0.0192044	RBM20	up
ENSG00000114698	1.2917	0.00145693	0.019371	PLSCR4	up
ENSG00000136261	-0.718017	0.00147227	0.0195542	BZW2	down
ENSG00000072310	-0.808748	0.00147558	0.0195772	SREBF1	down
ENSG00000170522	-0.711664	0.00148381	0.0196656	ELOVL6	down
ENSG00000132692	0.968099	0.00148564	0.0196691	BCAN	up
ENSG00000198039	-0.938414	0.00149414	0.0197606	ZNF273	down
ENSG00000171385	0.767657	0.00149654	0.0197715	KCND3	up
ENSG00000157500	-0.751381	0.00150339	0.0198409	APPL1	down
ENSG00000105676	-0.692367	0.00151614	0.0199881	ARMC6	down
ENSG00000079462	-0.768252	0.00151998	0.0199968	PAFAH1B3	down
ENSG00000006459	1.10178	0.00152	0.0199968	KDM7A	up
ENSG00000167085	-0.745838	0.00152387	0.0200267	PHB	down
ENSG00000138430	-0.65334	0.00153302	0.0201257	OLA1	down
ENSG00000123374	-0.866804	0.00154454	0.0202557	CDK2	down
ENSG00000136156	0.673833	0.0015513	0.0203042	ITM2B	up
ENSG00000167566	0.72279	0.00155149	0.0203042	NCKAP5L	up
ENSG00000122545	-0.679786	0.0015571	0.0203564	2024-09-07	down
ENSG00000138166	-0.731681	0.00155874	0.0203564	DUSP5	down
ENSG00000197712	0.975656	0.00156331	0.0203949	FAM114A1	up
ENSG00000100162	-1.16555	0.00156688	0.0204201	CENPM	down
ENSG00000112081	-0.629527	0.00158343	0.0205929	SRSF3	down
ENSG00000101911	-0.917483	0.00158199	0.0205929	PRPS2	down
ENSG00000074964	0.689885	0.00158611	0.0206062	ARHGEF10L	up
ENSG00000159082	0.775844	0.00159093	0.0206474	SYNJ1	up
ENSG00000204592	1.02719	0.0015956	0.0206865	HLA-E	up
ENSG00000092969	1.08439	0.00160159	0.0207427	TGFB2	up
ENSG00000109787	0.770952	0.00161422	0.0208846	KLF3	up
ENSG00000187243	-2.57443	0.00161877	0.0209218	MAGED4B	down
ENSG00000112877	-0.995064	0.00164287	0.0212114	CEP72	down
ENSG00000158321	0.737471	0.00164743	0.0212482	AUTS2	up
ENSG00000116030	-0.698598	0.00165008	0.0212605	SUMO1	down
ENSG00000184381	0.930894	0.001668	0.0214693	PLA2G6	up
ENSG00000160813	-0.81266	0.00167186	0.0214747	PPP1R35	down
ENSG00000174886	-0.958673	0.00167066	0.0214747	NDUFA11	down
ENSG00000266074	0.785589	0.00167833	0.0215136	BAHCC1	up
ENSG00000103042	0.93617	0.00167812	0.0215136	SLC38A7	up
ENSG00000146918	-0.955166	0.0016925	0.0216731	NCAPG2	down
ENSG00000136527	-0.633094	0.00169825	0.0217245	TRA2B	down
ENSG00000065150	-0.695722	0.00170037	0.0217293	IPO5	down
ENSG00000099341	-0.625185	0.00170472	0.0217448	PSMD8	down
ENSG00000164967	-0.932701	0.00170507	0.0217448	RPP25L	down
ENSG00000163002	-0.783782	0.00171301	0.0218238	NUP35	down
ENSG00000137267	-0.675987	0.00171562	0.0218348	TUBB2A	down
ENSG00000163131	1.49915	0.00172515	0.0219338	CTSS	up
ENSG00000184986	-0.862341	0.00173254	0.0220054	TMEM121	down
ENSG00000123933	0.704035	0.00173802	0.0220526	MXD4	up
ENSG00000131791	0.866084	0.00174141	0.0220732	PRKAB2	up
ENSG00000092140	-0.853554	0.0017481	0.0221179	G2E3	down
ENSG00000149577	0.775819	0.00174848	0.0221179	SIDT2	up
ENSG00000184752	-0.724759	0.00175467	0.0221737	NDUFA12	down
ENSG00000137807	-0.99643	0.00176363	0.0222645	KIF23	down
ENSG00000139990	0.70189	0.00176608	0.0222729	DCAF5	up
ENSG00000122483	-0.879211	0.0017682	0.0222772	CCDC18	down
ENSG00000182175	0.742309	0.00177839	0.0223605	RGMA	up
ENSG00000198576	-0.762032	0.00177743	0.0223605	ARC	down
ENSG00000175426	-1.67008	0.00178655	0.0224405	PCSK1	down
ENSG00000184220	-0.815824	0.00178849	0.0224423	CMSS1	down
ENSG00000159259	-1.03223	0.00179435	0.022452	CHAF1B	down
ENSG00000146143	-0.898772	0.00179337	0.022452	PRIM2	down
ENSG00000108799	0.788487	0.00179465	0.022452	EZH1	up
ENSG00000148358	0.635092	0.00180717	0.022586	GPR107	up
ENSG00000110046	0.737777	0.00181302	0.0226365	ATG2A	up
ENSG00000174775	-0.699939	0.00181862	0.0226837	HRAS	down
ENSG00000134250	0.674811	0.00182379	0.0227133	NOTCH2	up
ENSG00000185515	-0.917828	0.00182463	0.0227133	BRCC3	down
ENSG00000087245	0.735604	0.00182821	0.0227353	MMP2	up
ENSG00000141376	0.911652	0.00183387	0.0227831	BCAS3	up
ENSG00000184900	-0.647457	0.00183856	0.0228186	SUMO3	down
ENSG00000184924	-0.9799	0.00184583	0.0228861	PTRHD1	down
ENSG00000127241	1.6351	0.0018523	0.0229436	MASP1	up
ENSG00000113161	-0.70898	0.00188632	0.0233418	HMGCR	down
ENSG00000173575	0.743071	0.00189767	0.0234591	CHD2	up
ENSG00000145354	-0.781903	0.00191845	0.0236925	CISD2	down
ENSG00000157259	0.69069	0.00192495	0.0237493	GATAD1	up
ENSG00000141503	0.665574	0.00192756	0.023758	MINK1	up
ENSG00000184203	-0.736033	0.00194778	0.0239836	PPP1R2	down
ENSG00000100647	0.649195	0.0019606	0.024094	SUSD6	up
ENSG00000198858	-0.742829	0.00196058	0.024094	R3HDM4	down
ENSG00000170855	-0.885532	0.00196365	0.0241077	TRIAP1	down
ENSG00000143774	-0.631619	0.00197404	0.0241994	GUK1	down
ENSG00000110092	0.66056	0.00197499	0.0241994	CCND1	up
ENSG00000205363	0.994366	0.0019948	0.0243944	INSYN1	up
ENSG00000145861	-1.5836	0.00199297	0.0243944	C1QTNF2	down
ENSG00000094916	-0.624315	0.00200341	0.0244756	CBX5	down
ENSG00000152402	1.89509	0.00202404	0.0247036	GUCY1A2	up
ENSG00000138777	-0.729717	0.00203027	0.0247313	PPA2	down
ENSG00000102384	-1.15342	0.00202887	0.0247313	CENPI	down
ENSG00000039123	-0.72759	0.00203246	0.0247339	MTREX	down
ENSG00000108561	-0.738425	0.00203751	0.0247471	C1QBP	down
ENSG00000103995	-1.00548	0.00203632	0.0247471	CEP152	down
ENSG00000127418	0.839034	0.00204911	0.0248639	FGFRL1	up
ENSG00000110455	1.12593	0.00205145	0.0248681	ACCS	up
ENSG00000103121	-0.832478	0.00205639	0.0249038	CMC2	down
ENSG00000147684	-0.6303	0.00206496	0.0249605	NDUFB9	down
ENSG00000135245	-0.925191	0.00206506	0.0249605	HILPDA	down
ENSG00000224389	1.57391	0.00207467	0.0250524	C4B	up
ENSG00000168743	0.659137	0.00207895	0.0250799	NPNT	up
ENSG00000127951	1.15319	0.00208866	0.0251727	FGL2	up
ENSG00000113387	-0.690787	0.00209897	0.0252726	SUB1	down
ENSG00000011009	-0.68411	0.0021134	0.0254219	LYPLA2	down
ENSG00000130204	-0.711516	0.00211557	0.0254234	TOMM40	down
ENSG00000108578	-0.723914	0.00212906	0.0255419	BLMH	down
ENSG00000135476	-0.978742	0.0021336	0.0255419	ESPL1	down
ENSG00000103540	-0.793382	0.00213345	0.0255419	CCP110	down
ENSG00000120675	-0.915051	0.00213266	0.0255419	DNAJC15	down
ENSG00000129566	0.765261	0.00215443	0.025742	TEP1	up
ENSG00000120526	-0.906254	0.00215247	0.025742	NUDCD1	down
ENSG00000165609	-0.707834	0.00216381	0.0258293	NUDT5	down
ENSG00000123144	-0.677446	0.00218304	0.0260092	TRIR	down
ENSG00000128596	0.933622	0.00218135	0.0260092	CCDC136	up
ENSG00000108424	-0.636287	0.00220216	0.0261308	KPNB1	down
ENSG00000143742	-0.62123	0.00220188	0.0261308	SRP9	down
ENSG00000011260	-0.683304	0.00220286	0.0261308	UTP18	down
ENSG00000168765	-0.901422	0.0022012	0.0261308	GSTM4	down
ENSG00000135899	1.39547	0.0022037	0.0261308	SP110	up
ENSG00000176595	0.743729	0.00221794	0.0262748	KBTBD11	up
ENSG00000188549	0.828197	0.00223161	0.0264116	CCDC9B	up
ENSG00000275342	0.6434	0.00223881	0.0264718	PRAG1	up
ENSG00000168090	-0.67542	0.00224418	0.0265101	COPS6	down
ENSG00000169660	0.975218	0.00226892	0.0267772	HEXDC	up
ENSG00000276368	-2.0277	0.00227445	0.0268171	HIST1H2AJ	down
ENSG00000100567	-0.725165	0.00229954	0.0270622	PSMA3	down
ENSG00000142102	0.853359	0.00229957	0.0270622	PGGHG	up
ENSG00000120802	-0.883305	0.00231006	0.0270886	TMPO	down
ENSG00000095002	-0.685137	0.00231265	0.0270886	MSH2	down
ENSG00000132824	0.710594	0.00231224	0.0270886	SERINC3	up
ENSG00000067141	0.773511	0.00231002	0.0270886	NEO1	up
ENSG00000077348	-0.862601	0.00231063	0.0270886	EXOSC5	down
ENSG00000111358	-0.805449	0.00231941	0.0271408	GTF2H3	down
ENSG00000089847	1.78325	0.00232145	0.0271408	ANKRD24	up
ENSG00000134375	-0.674306	0.00232506	0.027141	TIMM17A	down
ENSG00000160213	-0.707805	0.00233253	0.027141	CSTB	down
ENSG00000188916	0.737265	0.00232725	0.027141	INSYN2	up
ENSG00000136143	-0.82291	0.00233177	0.027141	SUCLA2	down
ENSG00000048162	-0.823912	0.0023345	0.027141	NOP16	down
ENSG00000185127	-0.838737	0.0023331	0.027141	C6orf120	down
ENSG00000167508	-0.761032	0.00234926	0.0272619	MVD	down
ENSG00000154134	0.704402	0.0023477	0.0272619	ROBO3	up
ENSG00000106105	0.61175	0.00235263	0.0272757	GARS	up
ENSG00000198729	0.821581	0.0023651	0.0273695	PPP1R14C	up
ENSG00000134905	-0.723808	0.00236405	0.0273695	CARS2	down
ENSG00000144749	0.756073	0.00239181	0.027653	LRIG1	up
ENSG00000125826	0.842404	0.002399	0.0277105	RBCK1	up
ENSG00000125652	-0.676754	0.00240722	0.0277798	ALKBH7	down
ENSG00000177602	-1.12963	0.00240984	0.0277843	HASPIN	down
ENSG00000042832	-0.946639	0.00241229	0.0277869	TG	down
ENSG00000137563	-0.863638	0.00241957	0.0278451	GGH	down
ENSG00000151490	0.979987	0.00245107	0.0281817	PTPRO	up
ENSG00000119640	-0.978786	0.00245786	0.0282338	ACYP1	down
ENSG00000184635	-0.873007	0.00246925	0.0283126	ZNF93	down
ENSG00000104671	-0.827383	0.00246895	0.0283126	DCTN6	down
ENSG00000196230	-0.849702	0.00248614	0.028454	TUBB	down
ENSG00000164307	0.872004	0.00248601	0.028454	ERAP1	up
ENSG00000160014	-0.761773	0.00249087	0.0284821	CALM3	down
ENSG00000086061	-0.660149	0.00250428	0.028531	DNAJA1	down
ENSG00000173064	0.669107	0.00249915	0.028531	HECTD4	up
ENSG00000148019	-0.687776	0.00250404	0.028531	CEP78	down
ENSG00000161980	-0.945691	0.00250046	0.028531	POLR3K	down
ENSG00000179562	0.724518	0.00252245	0.0287118	GCC1	up
ENSG00000108010	-0.699779	0.00253437	0.0287765	GLRX3	down
ENSG00000161179	-0.740408	0.0025356	0.0287765	YDJC	down
ENSG00000120756	-0.765268	0.00253593	0.0287765	PLS1	down
ENSG00000161692	-0.862642	0.00253933	0.0287765	DBF4B	down
ENSG00000127419	0.848983	0.00253965	0.0287765	TMEM175	up
ENSG00000154127	-0.679554	0.00258381	0.0292504	UBASH3B	down
ENSG00000035499	-1.32994	0.00259067	0.0293015	DEPDC1B	down
ENSG00000134321	5.05299	0.00260606	0.0294489	RSAD2	up
ENSG00000276043	-0.794589	0.00261087	0.0294766	UHRF1	down
ENSG00000142168	-0.679915	0.0026291	0.0296557	SOD1	down
ENSG00000103018	-0.666556	0.0026633	0.0299873	CYB5B	down
ENSG00000160445	0.703236	0.00266234	0.0299873	ZER1	up
ENSG00000147889	-0.585954	0.00268241	0.0300395	CDKN2A	down
ENSG00000225663	-0.72612	0.00268466	0.0300395	MCRIP1	down
ENSG00000213563	-0.65707	0.00267829	0.0300395	C8orf82	down
ENSG00000140464	1.03565	0.00268476	0.0300395	PML	up
ENSG00000130713	-0.697454	0.00267854	0.0300395	EXOSC2	down
ENSG00000108669	0.789757	0.00267359	0.0300395	CYTH1	up
ENSG00000104691	-0.802314	0.00268087	0.0300395	UBXN8	down
ENSG00000134072	-1.36491	0.00268992	0.0300703	CAMK1	down
ENSG00000110955	-0.675138	0.00269475	0.0300963	ATP5F1B	down
ENSG00000058804	-0.76542	0.00269706	0.0300963	NDC1	down
ENSG00000155755	-0.822248	0.00271198	0.0302089	TMEM237	down
ENSG00000185345	1.78298	0.00271083	0.0302089	PRKN	up
ENSG00000164938	1.01765	0.00272132	0.0302859	TP53INP1	up
ENSG00000100304	-0.723941	0.00272691	0.0303211	TTLL12	down
ENSG00000164466	-0.640125	0.00274283	0.0304169	SFXN1	down
ENSG00000133612	0.676922	0.00274215	0.0304169	AGAP3	up
ENSG00000065060	0.757319	0.00273914	0.0304169	UHRF1BP1	up
ENSG00000101003	-0.980198	0.00275016	0.0304712	GINS1	down
ENSG00000184357	-2.44386	0.00277803	0.0307527	HIST1H1B	down
ENSG00000106397	-0.651631	0.00278853	0.0308143	PLOD3	down
ENSG00000111897	0.610166	0.00278762	0.0308143	SERINC1	up
ENSG00000114942	-0.720709	0.00280024	0.0308892	EEF1B2	down
ENSG00000112715	0.625098	0.00279891	0.0308892	VEGFA	up
ENSG00000104738	-0.886223	0.00281405	0.0310141	MCM4	down
ENSG00000087586	-0.982389	0.00281868	0.0310377	AURKA	down
ENSG00000167772	-1.33936	0.00283025	0.0311378	ANGPTL4	down
ENSG00000136436	0.702625	0.00283465	0.0311587	CALCOCO2	up
ENSG00000168439	-0.672207	0.00285123	0.0312658	STIP1	down
ENSG00000116962	0.663739	0.0028485	0.0312658	NID1	up
ENSG00000162636	-0.968238	0.0028519	0.0312658	FAM102B	down
ENSG00000164434	-0.592179	0.00285965	0.0312685	FABP7	down
ENSG00000185567	1.10213	0.00285961	0.0312685	AHNAK2	up
ENSG00000260001	-1.37172	0.00285723	0.0312685	TGFBR3L	down
ENSG00000142227	-0.685901	0.00286263	0.0312738	EMP3	down
ENSG00000004779	-0.660785	0.00286997	0.0313265	NDUFAB1	down
ENSG00000142235	1.62456	0.00287309	0.0313332	LMTK3	up
ENSG00000120217	3.03831	0.00287935	0.0313741	CD274	up
ENSG00000161677	-0.793895	0.00289118	0.0314756	JOSD2	down
ENSG00000075702	-0.908359	0.00289692	0.0315106	WDR62	down
ENSG00000169231	0.751624	0.00290748	0.031598	THBS3	up
ENSG00000141574	1.7052	0.00291255	0.0316256	SECTM1	up
ENSG00000172590	-0.74651	0.00292471	0.03173	MRPL52	down
ENSG00000120539	-0.775348	0.0029476	0.0319506	MASTL	down
ENSG00000074755	0.688394	0.00295662	0.0320206	ZZEF1	up
ENSG00000176105	-0.676932	0.00296218	0.0320531	YES1	down
ENSG00000173418	-0.677443	0.00297296	0.0321419	NAA20	down
ENSG00000173905	-0.613547	0.00299162	0.0323157	GOLIM4	down
ENSG00000179583	2.67176	0.00299421	0.0323158	CIITA	up
ENSG00000103449	0.625334	0.00301145	0.0324457	SALL1	up
ENSG00000134698	0.766466	0.0030096	0.0324457	AGO4	up
ENSG00000178764	0.699452	0.00303081	0.0325981	ZHX2	up
ENSG00000177839	0.730945	0.00302859	0.0325981	PCDHB9	up
ENSG00000065978	-0.680758	0.00303486	0.0326137	YBX1	down
ENSG00000170776	0.625435	0.00305666	0.0328197	AKAP13	up
ENSG00000156639	0.665648	0.00306933	0.0329274	ZFAND3	up
ENSG00000240230	0.698164	0.00308701	0.0330887	COX19	up
ENSG00000133863	-0.775702	0.00309839	0.0331822	TEX15	down
ENSG00000167513	-0.940157	0.00312363	0.0333509	CDT1	down
ENSG00000243449	-0.747682	0.00312216	0.0333509	C4orf48	down
ENSG00000099889	0.657966	0.00312481	0.0333509	ARVCF	up
ENSG00000113742	1.00952	0.00312175	0.0333509	CPEB4	up
ENSG00000187122	0.755239	0.00314003	0.0334848	SLIT1	up
ENSG00000090863	0.643198	0.00314308	0.0334887	GLG1	up
ENSG00000120265	-0.642143	0.00315213	0.0335565	PCMT1	down
ENSG00000115286	-0.724451	0.00315691	0.0335787	NDUFS7	down
ENSG00000132510	0.680838	0.00316214	0.0336058	KDM6B	up
ENSG00000113657	0.631305	0.00317053	0.0336663	DPYSL3	up
ENSG00000172009	-0.658378	0.00317431	0.0336779	THOP1	down
ENSG00000225190	0.800874	0.00317804	0.0336889	PLEKHM1	up
ENSG00000198521	-0.775152	0.00320195	0.0339135	ZNF43	down
ENSG00000135749	0.738534	0.00321751	0.0340495	PCNX2	up
ENSG00000175567	-0.70003	0.00322855	0.0341148	UCP2	down
ENSG00000173805	1.22851	0.00322914	0.0341148	HAP1	up
ENSG00000268043	0.859353	0.00324607	0.0342358	NBPF12	up
ENSG00000136122	-1.07114	0.00324398	0.0342358	BORA	down
ENSG00000131174	-0.695739	0.00325938	0.0343364	COX7B	down
ENSG00000180921	-1.74375	0.00326111	0.0343364	FAM83H	down
ENSG00000013810	-0.891349	0.0032687	0.0343585	TACC3	down
ENSG00000115540	-0.911297	0.00326623	0.0343585	MOB4	down
ENSG00000180198	-0.771827	0.00329178	0.034572	RCC1	down
ENSG00000111652	-0.619167	0.00329523	0.0345792	COPS7A	down
ENSG00000122034	-0.663239	0.00330275	0.0346	GTF3A	down
ENSG00000147162	0.812246	0.00330126	0.0346	OGT	up
ENSG00000179085	-0.732151	0.00332999	0.0348561	DPM3	down
ENSG00000181135	0.863483	0.00339197	0.0354751	ZNF707	up
ENSG00000167468	-0.664359	0.00339727	0.0355009	GPX4	down
ENSG00000171863	-0.714372	0.003413	0.0356355	RPS7	down
ENSG00000149541	-0.65116	0.00342068	0.0356859	B3GAT3	down
ENSG00000100219	0.593009	0.00343013	0.0357546	XBP1	up
ENSG00000132341	-0.661391	0.0034333	0.0357578	RAN	down
ENSG00000135624	-0.63905	0.00343775	0.0357744	CCT7	down
ENSG00000119013	-0.819304	0.0034422	0.0357908	NDUFB3	down
ENSG00000106355	-0.659592	0.0034724	0.0360665	LSM5	down
ENSG00000128581	-0.744284	0.0034746	0.0360665	IFT22	down
ENSG00000278828	1.58691	0.00347737	0.0360665	HIST1H3H	up
ENSG00000221978	0.797507	0.00348931	0.0361073	CCNL2	up
ENSG00000079739	-0.775143	0.00348997	0.0361073	PGM1	down
ENSG00000183624	-0.818476	0.00348824	0.0361073	HMCES	down
ENSG00000116649	-0.663339	0.00349467	0.036126	SRM	down
ENSG00000130165	-0.660528	0.00351294	0.0362849	ELOF1	down
ENSG00000162572	0.947373	0.00351947	0.0363223	SCNN1D	up
ENSG00000160818	-0.684044	0.00353621	0.036465	GPATCH4	down
ENSG00000099783	-0.602302	0.00355409	0.0365889	HNRNPM	down
ENSG00000198832	-1.16265	0.00355202	0.0365889	SELENOM	down
ENSG00000084764	0.762746	0.00356116	0.0366316	MAPRE3	up
ENSG00000118432	-0.847146	0.00356536	0.0366446	CNR1	down
ENSG00000124788	0.7036	0.00358005	0.0367653	ATXN1	up
ENSG00000128272	0.603565	0.00358795	0.0368162	ATF4	up
ENSG00000171222	-0.700403	0.00359645	0.0368732	SCAND1	down
ENSG00000133935	-0.736742	0.00360397	0.0368762	ERG28	down
ENSG00000154719	-0.741622	0.00360072	0.0368762	MRPL39	down
ENSG00000175701	-0.838182	0.00360559	0.0368762	MTLN	down
ENSG00000147955	-0.678147	0.00362164	0.03701	SIGMAR1	down
ENSG00000125611	-0.767418	0.00363197	0.0370853	CHCHD5	down
ENSG00000116133	-0.631653	0.00365099	0.0372491	DHCR24	down
ENSG00000196700	0.658683	0.00365741	0.0372841	ZNF512B	up
ENSG00000256043	0.90699	0.00366376	0.037288	CTSO	up
ENSG00000049249	1.01058	0.00366365	0.037288	TNFRSF9	up
ENSG00000106628	-0.692674	0.00366922	0.0373048	POLD2	down
ENSG00000138796	-0.7754	0.00367436	0.0373048	HADH	down
ENSG00000166016	0.765517	0.00367165	0.0373048	ABTB2	up
ENSG00000120738	-0.684774	0.0037231	0.0377689	EGR1	down
ENSG00000120899	0.814288	0.00374034	0.037913	PTK2B	up
ENSG00000180354	0.816638	0.00374646	0.0379135	MTURN	up
ENSG00000006015	-0.674886	0.0037458	0.0379135	REX1BD	down
ENSG00000198918	-0.791938	0.00375453	0.0379645	RPL39	down
ENSG00000167615	0.69036	0.00376317	0.0379904	LENG8	up
ENSG00000213676	0.671549	0.00376151	0.0379904	ATF6B	up
ENSG00000197102	0.581329	0.00377407	0.0380217	DYNC1H1	stable
ENSG00000074181	0.872024	0.0037754	0.0380217	NOTCH3	up
ENSG00000166851	-1.13771	0.00377504	0.0380217	PLK1	down
ENSG00000116221	-0.624049	0.00377897	0.038027	MRPL37	down
ENSG00000110811	-0.615382	0.00379676	0.0381447	P3H3	down
ENSG00000170266	0.788964	0.00379421	0.0381447	GLB1	up
ENSG00000075131	-0.776534	0.00381966	0.0383439	TIPIN	down
ENSG00000182985	0.714845	0.00383712	0.0384882	CADM1	up
ENSG00000168874	1.6464	0.00387488	0.0388358	ATOH8	up
ENSG00000111786	-0.655553	0.00388932	0.038887	SRSF9	down
ENSG00000164134	-0.623246	0.00388908	0.038887	NAA15	down
ENSG00000159593	-0.650023	0.00388498	0.038887	NAE1	down
ENSG00000126756	-0.750719	0.00389255	0.0388882	UXT	down
ENSG00000131584	0.591209	0.00389731	0.0389046	ACAP3	up
ENSG00000243335	0.789899	0.00390666	0.0389669	KCTD7	up
ENSG00000173141	-0.65529	0.00390996	0.0389687	MRPL57	down
ENSG00000159200	0.687239	0.00391697	0.0390074	RCAN1	up
ENSG00000115758	-0.610396	0.0039705	0.0393271	ODC1	down
ENSG00000131462	-0.791129	0.00397511	0.0393271	TUBG1	down
ENSG00000112667	-0.920661	0.00398054	0.0393271	DNPH1	down
ENSG00000186470	0.84066	0.00396717	0.0393271	BTN3A2	up
ENSG00000138092	-0.820622	0.00396475	0.0393271	CENPO	down
ENSG00000050748	-0.792335	0.00397847	0.0393271	MAPK9	down
ENSG00000066557	-0.773016	0.00396063	0.0393271	LRRC40	down
ENSG00000160783	-0.790278	0.00397181	0.0393271	PMF1	down
ENSG00000130529	0.851172	0.0039559	0.0393271	TRPM4	up
ENSG00000178718	-1.57275	0.00395856	0.0393271	RPP25	down
ENSG00000111335	4.6806	0.0039924	0.039382	OAS2	up
ENSG00000073464	0.827992	0.00399079	0.039382	CLCN4	up
ENSG00000080815	0.626927	0.00403086	0.03973	PSEN1	up
ENSG00000135596	0.637926	0.00403778	0.0397669	MICAL1	up
ENSG00000141867	0.587912	0.00404974	0.039781	BRD4	up
ENSG00000164087	-1.02022	0.00405125	0.039781	POC1A	down
ENSG00000198924	-0.793582	0.00405195	0.039781	DCLRE1A	down
ENSG00000160193	-0.721653	0.00404914	0.039781	WDR4	down
ENSG00000182580	0.761468	0.00406145	0.0397818	EPHB3	up
ENSG00000137094	1.02869	0.00405828	0.0397818	DNAJB5	up
ENSG00000056050	-0.773737	0.00406157	0.0397818	HPF1	down
ENSG00000188153	0.781741	0.00406766	0.0398102	COL4A5	up
ENSG00000105364	-0.638888	0.00408772	0.0399753	MRPL4	down
ENSG00000134308	-0.578901	0.00410012	0.0400339	YWHAQ	stable
ENSG00000080854	0.87957	0.00409848	0.0400339	IGSF9B	up
ENSG00000082641	0.609407	0.00411569	0.0401545	NFE2L1	up
ENSG00000105176	-0.626776	0.00413063	0.0401748	URI1	down
ENSG00000214655	0.714927	0.00412377	0.0401748	ZSWIM8	up
ENSG00000221890	0.769678	0.00412538	0.0401748	NPTXR	up
ENSG00000111801	0.969969	0.00413057	0.0401748	BTN3A3	up
ENSG00000005075	-0.688734	0.00414056	0.0402401	POLR2J	down
ENSG00000198938	-0.635256	0.00415129	0.040313	MT-CO3	down
ENSG00000150753	-0.619576	0.00415675	0.0403347	CCT5	down
ENSG00000146410	-1.29262	0.00419541	0.0406782	MTFR2	down
ENSG00000158402	-1.29629	0.00420172	0.0407078	CDC25C	down
ENSG00000265972	0.591967	0.00421146	0.0407706	TXNIP	up
ENSG00000100300	-0.725142	0.00421554	0.0407735	TSPO	down
ENSG00000119969	-0.817977	0.00421828	0.0407735	HELLS	down
ENSG00000274180	1.10254	0.00422362	0.0407935	NATD1	up
ENSG00000148356	0.702535	0.0042385	0.0409056	LRSAM1	up
ENSG00000204681	0.921643	0.00424269	0.0409145	GABBR1	up
ENSG00000116489	-0.631858	0.00427988	0.0412412	CAPZA1	down
ENSG00000198898	-0.732343	0.00430075	0.0414105	CAPZA2	down
ENSG00000164253	-0.690588	0.00431241	0.0414772	WDR41	down
ENSG00000161618	-0.735002	0.00431432	0.0414772	ALDH16A1	down
ENSG00000074800	-0.730862	0.00431872	0.0414876	ENO1	down
ENSG00000135114	5.65396	0.00433234	0.0415545	OASL	up
ENSG00000143434	0.90137	0.0043318	0.0415545	SEMA6C	up
ENSG00000277462	-1.09928	0.00437023	0.0418858	ZNF670	down
ENSG00000181938	-0.909821	0.00437359	0.0418859	GINS3	down
ENSG00000134769	0.715587	0.00439263	0.0420361	DTNA	up
ENSG00000139921	-0.594156	0.00441293	0.042198	TMX1	down
ENSG00000185668	1.64175	0.004423	0.042262	POU3F1	up
ENSG00000143653	-0.615464	0.00443835	0.0423439	SCCPDH	down
ENSG00000176101	-0.644331	0.00443535	0.0423439	SSNA1	down
ENSG00000002330	-0.707655	0.00445137	0.0424357	BAD	down
ENSG00000170779	-0.914952	0.00445817	0.0424682	CDCA4	down
ENSG00000124766	0.62545	0.00448372	0.0426465	SOX4	up
ENSG00000139178	0.775297	0.00448309	0.0426465	C1RL	up
ENSG00000138668	-0.641191	0.00452253	0.0429623	HNRNPD	down
ENSG00000150593	0.669463	0.00452723	0.0429623	PDCD4	up
ENSG00000048707	0.648217	0.0045272	0.0429623	VPS13D	up
ENSG00000124802	-1.16749	0.00454003	0.043051	EEF1E1	down
ENSG00000148396	0.576367	0.00456743	0.043278	SEC16A	stable
ENSG00000142676	-0.626681	0.00457405	0.0433079	RPL11	down
ENSG00000006194	0.670498	0.00459507	0.043474	ZNF263	up
ENSG00000253276	0.775324	0.00460534	0.0435382	CCDC71L	up
ENSG00000188315	0.982899	0.00463903	0.0437997	C3orf62	up
ENSG00000234965	-1.97481	0.00464	0.0437997	SHISA8	down
ENSG00000204856	-0.778763	0.00464456	0.0438096	FAM216A	down
ENSG00000182552	-0.757266	0.00466214	0.0439423	RWDD4	down
ENSG00000102401	0.658033	0.00466933	0.0439438	ARMCX3	up
ENSG00000149636	-0.764776	0.00466856	0.0439438	DSN1	down
ENSG00000169592	-0.653212	0.00467289	0.0439441	INO80E	down
ENSG00000213281	-0.593708	0.00468341	0.04401	NRAS	down
ENSG00000166197	-0.605198	0.00470097	0.0441086	NOLC1	down
ENSG00000186868	0.694169	0.00469837	0.0441086	MAPT	up
ENSG00000129946	0.667767	0.00471107	0.0441702	SHC2	up
ENSG00000171421	-0.852089	0.00473185	0.0443318	MRPL36	down
ENSG00000083312	-0.648864	0.00474246	0.0443647	TNPO1	down
ENSG00000145022	0.667033	0.00474122	0.0443647	TCTA	up
ENSG00000135486	-0.63796	0.00475751	0.0444722	HNRNPA1	down
ENSG00000069275	-0.605948	0.00481732	0.0449672	NUCKS1	down
ENSG00000107159	-1.9647	0.00481958	0.0449672	CA9	down
ENSG00000143543	-0.775177	0.00482126	0.0449672	JTB	down
ENSG00000261115	0.66991	0.00482517	0.0449702	TMEM178B	up
ENSG00000128604	1.68506	0.00482888	0.0449712	IRF5	up
ENSG00000180044	1.18903	0.00487949	0.0454087	C3orf80	up
ENSG00000147465	-1.27667	0.00489768	0.0455441	STAR	down
ENSG00000108826	-0.685143	0.00491139	0.045545	MRPL27	down
ENSG00000177169	0.726269	0.00491236	0.045545	ULK1	up
ENSG00000140400	0.635297	0.00491015	0.045545	MAN2C1	up
ENSG00000135298	0.837743	0.00490743	0.045545	ADGRB3	up
ENSG00000110628	0.767111	0.00493559	0.0457264	SLC22A18	up
ENSG00000113368	-0.856756	0.00497898	0.0460943	LMNB1	down
ENSG00000125869	0.739385	0.0050132	0.0463767	LAMP5	up
ENSG00000149806	-0.61535	0.00503357	0.0465308	FAU	down
ENSG00000074416	0.756543	0.00504608	0.0466119	MGLL	up
ENSG00000123737	-0.646393	0.00507221	0.0467612	EXOSC9	down
ENSG00000100216	-0.649138	0.00507117	0.0467612	TOMM22	down
ENSG00000137817	0.756464	0.00507346	0.0467612	PARP6	up
ENSG00000137547	-0.71453	0.00510758	0.0470409	MRPL15	down
ENSG00000213983	1.05073	0.00511716	0.0470945	AP1G2	up
ENSG00000278272	-1.92861	0.00512962	0.0471744	HIST1H3C	down
ENSG00000147475	0.61176	0.00521469	0.0478863	ERLIN2	up
ENSG00000104626	-0.601244	0.00521176	0.0478863	ERI1	down
ENSG00000134222	-0.641634	0.00522258	0.0479235	PSRC1	down
ENSG00000107282	0.759147	0.00523407	0.0479937	APBA1	up
ENSG00000143631	3.30353	0.00524739	0.0480805	FLG	up
ENSG00000129173	-1.04538	0.00525851	0.048115	E2F8	down
ENSG00000167136	-0.986207	0.00525884	0.048115	ENDOG	down
ENSG00000170381	-0.575749	0.00527996	0.0482023	SEMA3E	stable
ENSG00000129474	0.650061	0.00527836	0.0482023	AJUBA	up
ENSG00000132031	-2.95727	0.00527687	0.0482023	MATN3	down
ENSG00000100297	-0.769388	0.00531265	0.0484653	MCM5	down
ENSG00000176171	-0.752137	0.00532121	0.048508	BNIP3	down
ENSG00000198937	-0.865509	0.00532673	0.048523	CCDC167	down
ENSG00000183978	-0.654538	0.00533636	0.0485753	COA3	down
ENSG00000099817	-0.624591	0.00535379	0.0486984	POLR2E	down
ENSG00000064547	1.55708	0.0053601	0.0487204	LPAR2	up
ENSG00000088826	0.790113	0.00536825	0.048759	SMOX	up
ENSG00000197020	-0.792331	0.00537692	0.0487669	ZNF100	down
ENSG00000183486	5.83964	0.00537342	0.0487669	MX2	up
ENSG00000107551	0.768664	0.00540981	0.0490244	RASSF4	up
ENSG00000133818	-0.751322	0.00541316	0.0490244	RRAS2	down
ENSG00000169188	-0.710876	0.00542474	0.0490937	APEX2	down
ENSG00000168488	0.586295	0.00544947	0.0492435	ATXN2L	up
ENSG00000101236	0.685333	0.00545246	0.0492435	RNF24	up
ENSG00000158856	-0.925054	0.00545311	0.0492435	DMTN	down
ENSG00000088325	-0.910689	0.00553891	0.049913	TPX2	down
ENSG00000155366	-0.59313	0.00553923	0.049913	RHOC	down
ENSG00000116830	-0.683163	0.00553706	0.049913	TTF2	down
ENSG00000164342	1.85514	0.00554842	0.0499598	TLR3	up
ENSG00000011028	0.850997	0.0055547	0.0499803	MRC2	up
ENSG00000105669	-0.588834	0.00556561	0.0500065	COPE	stable
ENSG00000100348	-0.60993	0.00556264	0.0500065	TXN2	stable
ENSG00000135046	0.804593	0.00556995	0.0500095	ANXA1	stable
ENSG00000121104	0.731916	0.00557986	0.0500625	FAM117A	stable
ENSG00000111602	-0.763953	0.00558658	0.0500869	TIMELESS	stable
ENSG00000134690	-1.0019	0.00559715	0.0501144	CDCA8	stable
ENSG00000132436	-0.742707	0.00559767	0.0501144	FIGNL1	stable
ENSG00000115053	-0.612607	0.00560388	0.0501333	NCL	stable
ENSG00000182463	0.648978	0.00560781	0.0501333	TSHZ2	stable
ENSG00000198727	-0.567395	0.00561983	0.0502049	MT-CYB	stable
ENSG00000145220	-0.810268	0.00562798	0.0502059	LYAR	stable
ENSG00000277117	1.74712	0.00562562	0.0502059	FP565260.3	stable
ENSG00000196591	-0.5725	0.0056719	0.0505359	HDAC2	stable
ENSG00000030582	0.608539	0.00567305	0.0505359	GRN	stable
ENSG00000111912	0.850213	0.00570327	0.0507688	NCOA7	stable
ENSG00000071282	0.962621	0.00570942	0.0507874	LMCD1	stable
ENSG00000101868	-0.778287	0.00575846	0.051173	POLA1	stable
ENSG00000171132	0.764808	0.00576095	0.051173	PRKCE	stable
ENSG00000154473	-0.602377	0.00576688	0.0511892	BUB3	stable
ENSG00000156232	0.873236	0.00579137	0.0513701	WHAMM	stable
ENSG00000103202	-0.806595	0.00580521	0.0514564	NME4	stable
ENSG00000182952	-0.625061	0.00581864	0.051466	HMGN4	stable
ENSG00000102893	-0.653928	0.00581831	0.051466	PHKB	stable
ENSG00000130649	1.92765	0.00581469	0.051466	CYP2E1	stable
ENSG00000103152	-0.744207	0.00582733	0.0515063	MPG	stable
ENSG00000213639	-0.598151	0.00585156	0.0516502	PPP1CB	stable
ENSG00000020577	0.749551	0.00585187	0.0516502	SAMD4A	stable
ENSG00000160007	0.564124	0.00587778	0.0518422	ARHGAP35	stable
ENSG00000132780	-0.556535	0.00588419	0.0518464	NASP	stable
ENSG00000125851	-0.632019	0.00588654	0.0518464	PCSK2	stable
ENSG00000110104	-0.678656	0.00589103	0.0518494	CCDC86	stable
ENSG00000160208	-0.610436	0.00592107	0.0520488	RRP1B	stable
ENSG00000172244	-1.02581	0.00592202	0.0520488	C5orf34	stable
ENSG00000108924	1.15253	0.00593364	0.0521143	HLF	stable
ENSG00000007080	-0.656699	0.00598903	0.0525638	CCDC124	stable
ENSG00000180879	-0.585064	0.00600219	0.0526054	SSR4	stable
ENSG00000180817	-0.621001	0.00600176	0.0526054	PPA1	stable
ENSG00000105327	1.09147	0.0060383	0.0528849	BBC3	stable
ENSG00000135679	-0.665018	0.00604968	0.0529474	MDM2	stable
ENSG00000183072	-0.81302	0.0060774	0.0531528	NKX2-5	stable
ENSG00000160799	-0.754819	0.00609425	0.0532629	CCDC12	stable
ENSG00000076108	0.577534	0.00613396	0.0534977	BAZ2A	stable
ENSG00000138834	0.578445	0.00613346	0.0534977	MAPK8IP3	stable
ENSG00000065923	1.36888	0.00612766	0.0534977	SLC9A7	stable
ENSG00000102879	-1.16608	0.00614042	0.0535167	CORO1A	stable
ENSG00000122566	-0.526018	0.00615355	0.0535565	HNRNPA2B1	stable
ENSG00000140990	-0.626898	0.00614946	0.0535565	NDUFB10	stable
ENSG00000091483	-0.761795	0.0061737	0.0536572	FH	stable
ENSG00000144354	-0.763081	0.00617371	0.0536572	CDCA7	stable
ENSG00000260916	1.51771	0.00618466	0.053715	CCPG1	stable
ENSG00000115128	-0.627892	0.00620055	0.0538156	SF3B6	stable
ENSG00000104419	-0.663268	0.00621157	0.0538738	NDRG1	stable
ENSG00000184162	-0.824844	0.00621712	0.0538845	NR2C2AP	stable
ENSG00000137877	1.97949	0.0062299	0.0539579	SPTBN5	stable
ENSG00000087258	0.678937	0.00624379	0.0540408	GNAO1	stable
ENSG00000112249	-0.642069	0.00627283	0.0542545	ASCC3	stable
ENSG00000164045	-0.95968	0.00629751	0.0543619	CDC25A	stable
ENSG00000168026	1.47992	0.00629829	0.0543619	TTC21A	stable
ENSG00000260691	1.40595	0.00629224	0.0543619	ANKRD20A1	stable
ENSG00000102921	0.660024	0.00631861	0.0544997	N4BP1	stable
ENSG00000067445	0.675988	0.00633618	0.0545777	TRO	stable
ENSG00000174891	-0.736312	0.00634076	0.0545777	RSRC1	stable
ENSG00000183765	-0.823083	0.00634003	0.0545777	CHEK2	stable
ENSG00000179832	0.760304	0.00634633	0.054588	MROH1	stable
ENSG00000091656	0.807587	0.00636528	0.0547134	ZFHX4	stable
ENSG00000123329	1.81097	0.00639008	0.0548888	ARHGAP9	stable
ENSG00000137936	0.697772	0.00641244	0.055006	BCAR3	stable
ENSG00000049323	2.08944	0.00641253	0.055006	LTBP1	stable
ENSG00000135069	0.597133	0.00644739	0.0552557	PSAT1	stable
ENSG00000204392	-0.677254	0.00645047	0.0552557	LSM2	stable
ENSG00000087302	-0.566853	0.00645626	0.0552674	RTRAF	stable
ENSG00000156374	-0.847559	0.00647109	0.0553564	PCGF6	stable
ENSG00000153250	0.610476	0.0064768	0.0553613	RBMS1	stable
ENSG00000115738	0.723921	0.00648052	0.0553613	ID2	stable
ENSG00000012963	-0.629015	0.00650502	0.0555326	UBR7	stable
ENSG00000139182	0.722411	0.00653328	0.0557358	CLSTN3	stable
ENSG00000188846	-0.613063	0.00656378	0.0559237	RPL14	stable
ENSG00000130935	-0.614112	0.00656426	0.0559237	NOL11	stable
ENSG00000122966	-0.706645	0.00657915	0.0559743	CIT	stable
ENSG00000164306	-0.809838	0.00657615	0.0559743	PRIMPOL	stable
ENSG00000010322	0.564166	0.00659149	0.0560411	NISCH	stable
ENSG00000185513	1.5267	0.00659754	0.0560544	L3MBTL1	stable
ENSG00000143842	0.692577	0.00660262	0.0560595	SOX13	stable
ENSG00000052841	0.605703	0.00663292	0.0562403	TTC17	stable
ENSG00000172428	-0.66099	0.00662945	0.0562403	COPS9	stable
ENSG00000001036	-0.577559	0.0066381	0.0562461	FUCA2	stable
ENSG00000198467	-0.615788	0.00667548	0.0564962	TPM2	stable
ENSG00000110063	-0.686517	0.00667666	0.0564962	DCPS	stable
ENSG00000074695	-0.560521	0.00670924	0.0566061	LMAN1	stable
ENSG00000205356	0.601195	0.00670337	0.0566061	TECPR1	stable
ENSG00000196678	-0.829204	0.00671229	0.0566061	ERI2	stable
ENSG00000132274	5.3058	0.00670445	0.0566061	TRIM22	stable
ENSG00000172005	1.06327	0.00670173	0.0566061	MAL	stable
ENSG00000177697	-0.620506	0.00676053	0.0569745	CD151	stable
ENSG00000196220	0.759316	0.00679326	0.0572033	SRGAP3	stable
ENSG00000163637	0.78557	0.00679684	0.0572033	PRICKLE2	stable
ENSG00000143786	0.618692	0.00682392	0.0573926	CNIH3	stable
ENSG00000143947	-0.65314	0.0068314	0.0574169	RPS27A	stable
ENSG00000029993	-0.693296	0.00684328	0.0574394	HMGB3	stable
ENSG00000025770	-0.625422	0.00683889	0.0574394	NCAPH2	stable
ENSG00000185813	-0.738923	0.00684805	0.0574409	PCYT2	stable
ENSG00000011243	0.63137	0.00686425	0.0574996	AKAP8L	stable
ENSG00000114841	0.92393	0.00686398	0.0574996	DNAH1	stable
ENSG00000186185	-1.01007	0.006878	0.0575762	KIF18B	stable
ENSG00000184545	0.855486	0.0068958	0.0576865	DUSP8	stable
ENSG00000125841	-0.596387	0.00690248	0.0577038	NRSN2	stable
ENSG00000171858	-0.688249	0.00696092	0.0581535	RPS21	stable
ENSG00000165915	0.618712	0.0069961	0.0583693	SLC39A13	stable
ENSG00000187522	-0.763779	0.00699513	0.0583693	HSPA14	stable
ENSG00000105136	0.789695	0.00700591	0.0584121	ZNF419	stable
ENSG00000159377	-0.588596	0.00701646	0.0584611	PSMB4	stable
ENSG00000116745	-1.00734	0.00705255	0.0587227	RPE65	stable
ENSG00000100591	-0.567558	0.00709664	0.0590112	AHSA1	stable
ENSG00000152439	0.868201	0.00709478	0.0590112	ZNF773	stable
ENSG00000136522	-0.684371	0.00711303	0.0591081	MRPL47	stable
ENSG00000100764	-0.581905	0.00713839	0.0592795	PSMC1	stable
ENSG00000133466	-0.627753	0.00714388	0.0592857	C1QTNF6	stable
ENSG00000004478	-0.663708	0.00719077	0.0595647	FKBP4	stable
ENSG00000149503	-0.818968	0.0071918	0.0595647	INCENP	stable
ENSG00000066322	-0.620986	0.00718954	0.0595647	ELOVL1	stable
ENSG00000131470	-0.846681	0.00720165	0.0596068	PSMC3IP	stable
ENSG00000111962	0.790579	0.00721557	0.0596825	UST	stable
ENSG00000136930	-0.558633	0.00722703	0.0596964	PSMB7	stable
ENSG00000164171	0.65683	0.00723159	0.0596964	ITGA2	stable
ENSG00000185404	1.67375	0.00722408	0.0596964	SP140L	stable
ENSG00000115461	-0.599259	0.00723752	0.059706	IGFBP5	stable
ENSG00000110619	0.560093	0.00724574	0.0597343	CARS	stable
ENSG00000135925	1.52039	0.00726329	0.0598396	WNT10A	stable
ENSG00000215021	-0.633828	0.00732567	0.0603137	PHB2	stable
ENSG00000129968	-0.549455	0.00734376	0.0604228	ABHD17A	stable
ENSG00000185278	0.751107	0.00735045	0.0604381	ZBTB37	stable
ENSG00000172469	-0.776111	0.00737441	0.0604562	MANEA	stable
ENSG00000175305	-1.04312	0.00736949	0.0604562	CCNE2	stable
ENSG00000182179	2.92544	0.00737684	0.0604562	UBA7	stable
ENSG00000108641	-0.754225	0.00736301	0.0604562	B9D1	stable
ENSG00000142961	1.01364	0.00737642	0.0604562	MOB3C	stable
ENSG00000037897	-0.539092	0.00740235	0.0606256	METTL1	stable
ENSG00000182718	-0.523302	0.00748125	0.0612316	ANXA2	stable
ENSG00000103657	0.577958	0.00749635	0.061315	HERC1	stable
ENSG00000187498	0.673881	0.00753523	0.0615928	COL4A1	stable
ENSG00000166165	-0.562701	0.00754422	0.0616177	CKB	stable
ENSG00000155961	0.761927	0.00754815	0.0616177	RAB39B	stable
ENSG00000163950	-0.67644	0.00761241	0.0620057	SLBP	stable
ENSG00000213190	-0.615534	0.00760402	0.0620057	MLLT11	stable
ENSG00000146416	-0.64938	0.00762544	0.0620057	AIG1	stable
ENSG00000171960	-0.757996	0.00762082	0.0620057	PPIH	stable
ENSG00000262919	-0.816185	0.00762075	0.0620057	CCNQ	stable
ENSG00000179546	1.9222	0.00762306	0.0620057	HTR1D	stable
ENSG00000142156	0.530622	0.00763396	0.0620346	COL6A1	stable
ENSG00000254995	2.36473	0.00766134	0.0622167	STX16-NPEPL1	stable
ENSG00000080345	-0.747376	0.00767175	0.0622607	RIF1	stable
ENSG00000137818	-0.671808	0.00773677	0.0627477	RPLP1	stable
ENSG00000114850	-0.575835	0.00775015	0.062751	SSR3	stable
ENSG00000136450	-0.704597	0.00774587	0.062751	SRSF1	stable
ENSG00000130770	-0.638441	0.00775224	0.062751	ATP5IF1	stable
ENSG00000187775	1.10331	0.00776445	0.0628091	DNAH17	stable
ENSG00000135617	-0.800178	0.00779418	0.0630088	PRADC1	stable
ENSG00000168297	0.829569	0.00781572	0.0631421	PXK	stable
ENSG00000213626	0.688542	0.00784031	0.0632999	LBH	stable
ENSG00000261236	-0.608147	0.00785299	0.0633216	BOP1	stable
ENSG00000126653	-0.636087	0.00785313	0.0633216	NSRP1	stable
ENSG00000152193	-0.836277	0.00787426	0.063451	RNF219	stable
ENSG00000125970	-0.584583	0.00788736	0.0634548	RALY	stable
ENSG00000124181	0.610383	0.00791628	0.0634548	PLCG1	stable
ENSG00000129484	-0.615799	0.00790544	0.0634548	PARP2	stable
ENSG00000162407	0.70077	0.00789752	0.0634548	PLPP3	stable
ENSG00000117036	0.624856	0.00790386	0.0634548	ETV3	stable
ENSG00000163482	0.722805	0.00792043	0.0634548	STK36	stable
ENSG00000154803	0.686854	0.00792015	0.0634548	FLCN	stable
ENSG00000063438	1.7918	0.00789119	0.0634548	AHRR	stable
ENSG00000183828	-0.896801	0.00791069	0.0634548	NUDT14	stable
ENSG00000105939	0.74461	0.00794858	0.0636395	ZC3HAV1	stable
ENSG00000160606	-0.670019	0.00797557	0.0638147	TLCD1	stable
ENSG00000179091	-0.588068	0.00801452	0.0639352	CYC1	stable
ENSG00000204231	0.665859	0.00800805	0.0639352	RXRB	stable
ENSG00000104228	0.603523	0.00801619	0.0639352	TRIM35	stable
ENSG00000185585	1.05705	0.00801272	0.0639352	OLFML2A	stable
ENSG00000198417	0.984493	0.00800161	0.0639352	MT1F	stable
ENSG00000219545	-0.762413	0.00802662	0.0639367	UMAD1	stable
ENSG00000068078	1.10389	0.00802478	0.0639367	FGFR3	stable
ENSG00000173065	0.62742	0.00804477	0.0640405	FAM222B	stable
ENSG00000094880	-0.712168	0.00810116	0.0643664	CDC23	stable
ENSG00000040275	-0.682334	0.00809603	0.0643664	SPDL1	stable
ENSG00000123179	-0.813532	0.00809643	0.0643664	EBPL	stable
ENSG00000130303	3.81419	0.00811799	0.0644182	BST2	stable
ENSG00000132470	1.04051	0.00811386	0.0644182	ITGB4	stable
ENSG00000132837	1.67143	0.00812586	0.0644397	DMGDH	stable
ENSG00000170439	-0.566314	0.00814573	0.0645563	METTL7B	stable
ENSG00000133401	0.840582	0.00816977	0.0647059	PDZD2	stable
ENSG00000165283	-0.582559	0.00830548	0.065739	STOML2	stable
ENSG00000205670	2.18285	0.00831303	0.0657571	SMIM11A	stable
ENSG00000205517	0.872994	0.00832377	0.0658005	RGL3	stable
ENSG00000090857	0.641398	0.00834125	0.065897	PDPR	stable
ENSG00000135776	-0.740875	0.00837034	0.066085	ABCB10	stable
ENSG00000143442	0.56628	0.00837922	0.0660947	POGZ	stable
ENSG00000196754	-1.69088	0.00838215	0.0660947	S100A2	stable
ENSG00000064490	-0.593257	0.00843513	0.0664705	RFXANK	stable
ENSG00000133392	1.51236	0.00844615	0.0665155	MYH11	stable
ENSG00000197982	-0.558541	0.00848003	0.0667402	C1orf122	stable
ENSG00000128524	-0.560519	0.00849508	0.0668166	ATP6V1F	stable
ENSG00000159202	0.550176	0.00851224	0.0669094	UBE2Z	stable
ENSG00000170873	0.622622	0.00853992	0.0670848	MTSS1	stable
ENSG00000166794	-0.55691	0.00856002	0.0672005	PPIB	stable
ENSG00000160124	-1.00907	0.00857194	0.0672518	CCDC58	stable
ENSG00000068489	-0.898759	0.00858443	0.0672781	PRR11	stable
ENSG00000155254	-0.852446	0.00858606	0.0672781	MARVELD1	stable
ENSG00000156136	-0.757878	0.0085965	0.0673074	DCK	stable
ENSG00000013288	0.651907	0.00860057	0.0673074	MAN2B2	stable
ENSG00000180425	1.0154	0.00861521	0.0673448	C11orf71	stable
ENSG00000183889	1.86679	0.00861612	0.0673448	PKD1P1	stable
ENSG00000111665	-0.941417	0.00864414	0.0675216	CDCA3	stable
ENSG00000142599	0.53166	0.00866658	0.0676421	RERE	stable
ENSG00000166887	0.590065	0.00867597	0.0676421	VPS39	stable
ENSG00000108559	-0.565367	0.00867375	0.0676421	NUP88	stable
ENSG00000137502	0.771635	0.00868122	0.0676421	RAB30	stable
ENSG00000111640	-0.667461	0.00870516	0.0677863	GAPDH	stable
ENSG00000070018	0.577117	0.00875287	0.0680627	LRP6	stable
ENSG00000181610	-0.600761	0.00875098	0.0680627	MRPS23	stable
ENSG00000081923	1.60762	0.00875699	0.0680627	ATP8B1	stable
ENSG00000135503	0.636469	0.00876384	0.0680736	ACVR1B	stable
ENSG00000145703	-0.585348	0.00878441	0.068191	IQGAP2	stable
ENSG00000100311	1.15443	0.00879127	0.0682019	PDGFB	stable
ENSG00000184575	0.521353	0.00883945	0.0684907	XPOT	stable
ENSG00000143256	-0.59784	0.00883409	0.0684907	PFDN2	stable
ENSG00000117318	0.738466	0.00885293	0.0685526	ID3	stable
ENSG00000275591	-1.04388	0.00886276	0.0685862	XKR5	stable
ENSG00000072121	0.72972	0.00889966	0.0688292	ZFYVE26	stable
ENSG00000137822	-0.638905	0.00894404	0.0691297	TUBGCP4	stable
ENSG00000138646	1.02553	0.00894978	0.0691313	HERC5	stable
ENSG00000241360	-0.903383	0.00896885	0.0692358	PDXP	stable
ENSG00000259207	1.17618	0.00898294	0.0693017	ITGB3	stable
ENSG00000116106	0.789179	0.00899414	0.0693453	EPHA4	stable
ENSG00000163257	0.631223	0.0090046	0.0693832	DCAF16	stable
ENSG00000145681	-0.929017	0.00903297	0.0695588	HAPLN1	stable
ENSG00000107020	-0.744493	0.0090671	0.0697787	PLGRKT	stable
ENSG00000112343	1.07652	0.00907268	0.0697787	TRIM38	stable
ENSG00000004700	-0.733743	0.00911618	0.0700701	RECQL	stable
ENSG00000165704	-0.647337	0.00916024	0.0703655	HPRT1	stable
ENSG00000106012	0.614023	0.00917767	0.0704561	IQCE	stable
ENSG00000120694	-0.544505	0.00918543	0.0704723	HSPH1	stable
ENSG00000135424	0.526593	0.00919229	0.0704817	ITGA7	stable
ENSG00000153774	-0.672345	0.00925073	0.0708864	CFDP1	stable
ENSG00000154920	-0.827342	0.00926349	0.0709171	EME1	stable
ENSG00000149256	1.14203	0.0092661	0.0709171	TENM4	stable
ENSG00000096968	1.03673	0.00927387	0.0709332	JAK2	stable
ENSG00000162804	1.8066	0.00929078	0.0710191	SNED1	stable
ENSG00000145990	1.07658	0.00930043	0.0710494	GFOD1	stable
ENSG00000165775	-0.605631	0.00933824	0.0712946	FUNDC2	stable
ENSG00000105677	-0.592849	0.00934428	0.0712972	TMEM147	stable
ENSG00000164985	-0.527796	0.00936819	0.071436	PSIP1	stable
ENSG00000149131	1.53329	0.00938415	0.0715141	SERPING1	stable
ENSG00000115268	-0.626573	0.0094201	0.0717443	RPS15	stable
ENSG00000143314	-0.688349	0.00944067	0.0718572	MRPL24	stable
ENSG00000160223	1.55059	0.00946145	0.0719715	ICOSLG	stable
ENSG00000055332	0.929725	0.0094749	0.0720262	EIF2AK2	stable
ENSG00000185101	1.86276	0.00948017	0.0720262	ANO9	stable
ENSG00000115525	0.70319	0.00951654	0.0722147	ST3GAL5	stable
ENSG00000066230	2.015	0.00951299	0.0722147	SLC9A3	stable
ENSG00000102271	-0.602232	0.00954825	0.0724114	KLHL4	stable
ENSG00000253250	-1.20457	0.00955784	0.0724402	C8orf88	stable
ENSG00000249992	-0.544627	0.00959639	0.0726883	TMEM158	stable
ENSG00000026652	0.662501	0.00961358	0.0727744	AGPAT4	stable
ENSG00000073050	-0.653194	0.00962931	0.0728494	XRCC1	stable
ENSG00000170558	0.521219	0.00967082	0.0731191	CDH2	stable
ENSG00000125266	0.663535	0.00969528	0.0732598	EFNB2	stable
ENSG00000114853	0.819982	0.00973315	0.0735015	ZBTB47	stable
ENSG00000054523	0.538966	0.00975093	0.0735912	KIF1B	stable
ENSG00000175309	0.712297	0.00975979	0.0736137	PHYKPL	stable
ENSG00000111252	0.568342	0.00979473	0.0737881	SH2B3	stable
ENSG00000072682	0.754548	0.00979254	0.0737881	P4HA2	stable
ENSG00000257093	0.582744	0.00980742	0.0738392	KIAA1147	stable
ENSG00000198563	0.74046	0.00983912	0.0740333	DDX39B	stable
ENSG00000007541	0.701703	0.0098708	0.0741823	PIGQ	stable
ENSG00000139734	-0.900643	0.0098708	0.0741823	DIAPH3	stable
ENSG00000170540	-0.608294	0.00990483	0.0742041	ARL6IP1	stable
ENSG00000041357	-0.535891	0.00991526	0.0742041	PSMA4	stable
ENSG00000187605	0.574295	0.00988473	0.0742041	TET3	stable
ENSG00000221829	-0.753026	0.00989378	0.0742041	FANCG	stable
ENSG00000055950	-0.612623	0.00989601	0.0742041	MRPL43	stable
ENSG00000132376	0.658949	0.00990977	0.0742041	INPP5K	stable
ENSG00000089101	2.3345	0.00990625	0.0742041	CFAP61	stable
ENSG00000074590	0.862506	0.00995737	0.0744747	NUAK1	stable
ENSG00000125875	0.617371	0.00996959	0.0744769	TBC1D20	stable
ENSG00000142303	0.824398	0.00996859	0.0744769	ADAMTS10	stable
ENSG00000197894	-0.585232	0.00998887	0.0745764	ADH5	stable
ENSG00000038274	-0.596052	0.0100128	0.0747101	MAT2B	stable
ENSG00000101000	-1.56909	0.010032	0.0748087	PROCR	stable
ENSG00000065911	0.521409	0.0100541	0.0749289	MTHFD2	stable
ENSG00000181444	1.20077	0.0100699	0.0750021	ZNF467	stable
ENSG00000138381	-0.615022	0.0100774	0.0750134	ASNSD1	stable
ENSG00000149136	-0.575366	0.0100987	0.075127	SSRP1	stable
ENSG00000147586	-1.11443	0.0101194	0.075236	MRPS28	stable
ENSG00000160949	-0.601645	0.010178	0.0756267	TONSL	stable
ENSG00000147894	-0.752747	0.0102113	0.0758291	C9orf72	stable
ENSG00000071991	-0.671914	0.0102193	0.0758437	CDH19	stable
ENSG00000166348	0.694043	0.0102318	0.0758912	USP54	stable
ENSG00000122778	0.571385	0.0102455	0.075948	KIAA1549	stable
ENSG00000180992	-0.635961	0.0102674	0.0760652	MRPL14	stable
ENSG00000181396	-0.615814	0.0102897	0.0761849	OGFOD3	stable
ENSG00000106479	0.665948	0.0102985	0.0762052	ZNF862	stable
ENSG00000065717	0.828151	0.0103123	0.0762624	TLE2	stable
ENSG00000134056	-0.830897	0.0103198	0.0762722	MRPS36	stable
ENSG00000142864	-0.536033	0.010355	0.0764109	SERBP1	stable
ENSG00000108433	0.561939	0.0103569	0.0764109	GOSR2	stable
ENSG00000112659	0.693418	0.0103466	0.0764109	CUL9	stable
ENSG00000137770	-0.594343	0.0104035	0.0767098	CTDSPL2	stable
ENSG00000183617	-0.6464	0.0104346	0.0767686	MRPL54	stable
ENSG00000167306	0.719836	0.0104249	0.0767686	MYO5B	stable
ENSG00000134253	0.744351	0.0104361	0.0767686	TRIM45	stable
ENSG00000167100	0.900078	0.0104268	0.0767686	SAMD14	stable
ENSG00000076003	-0.683411	0.0104522	0.0768419	MCM6	stable
ENSG00000132329	-0.700897	0.0104799	0.0770003	RAMP1	stable
ENSG00000005108	0.776454	0.0104898	0.0770281	THSD7A	stable
ENSG00000100307	1.11997	0.0105422	0.0773674	CBX7	stable
ENSG00000157601	4.49061	0.0105791	0.0775925	MX1	stable
ENSG00000050344	0.572871	0.0106071	0.0777191	NFE2L3	stable
ENSG00000168936	0.684643	0.0106088	0.0777191	TMEM129	stable
ENSG00000086475	-0.660486	0.0106309	0.0778091	SEPHS1	stable
ENSG00000108771	2.56057	0.0106335	0.0778091	DHX58	stable
ENSG00000160305	0.572346	0.0106518	0.0778975	DIP2A	stable
ENSG00000242732	0.698001	0.0106632	0.077935	RTL5	stable
ENSG00000184481	1.05201	0.0106871	0.0780638	FOXO4	stable
ENSG00000164061	0.915073	0.0107427	0.0784239	BSN	stable
ENSG00000166762	1.32322	0.0107668	0.0785544	CATSPER2	stable
ENSG00000150787	-0.722426	0.0107821	0.0786198	PTS	stable
ENSG00000167552	-0.56311	0.0107901	0.0786327	TUBA1A	stable
ENSG00000100842	-0.550556	0.0108374	0.0788848	EFS	stable
ENSG00000275395	1.17252	0.0108358	0.0788848	FCGBP	stable
ENSG00000070010	-0.546492	0.0108623	0.0790206	UFD1	stable
ENSG00000065518	-0.599735	0.0108753	0.0790687	NDUFB4	stable
ENSG00000184221	0.81427	0.0108833	0.0790808	OLIG1	stable
ENSG00000165637	-0.560994	0.010917	0.079164	VDAC2	stable
ENSG00000184863	0.579061	0.0109189	0.079164	RBM33	stable
ENSG00000171552	-0.597319	0.01092	0.079164	BCL2L1	stable
ENSG00000143322	0.653828	0.0109152	0.079164	ABL2	stable
ENSG00000172757	-0.563189	0.0109734	0.0795046	CFL1	stable
ENSG00000204267	0.725586	0.010991	0.0795816	TAP2	stable
ENSG00000100253	2.29513	0.0109968	0.0795816	MIOX	stable
ENSG00000167536	-0.668581	0.0110111	0.0795887	DHRS13	stable
ENSG00000086200	-0.65534	0.0110158	0.0795887	IPO11	stable
ENSG00000198838	1.01397	0.0110168	0.0795887	RYR3	stable
ENSG00000086758	0.506413	0.011053	0.0798036	HUWE1	stable
ENSG00000169964	0.861191	0.0110835	0.0799775	TMEM42	stable
ENSG00000136842	1.60912	0.011144	0.0803681	TMOD1	stable
ENSG00000198794	0.611097	0.0111918	0.0805534	SCAMP5	stable
ENSG00000106853	-0.723956	0.0111853	0.0805534	PTGR1	stable
ENSG00000169857	-0.816262	0.0111799	0.0805534	AVEN	stable
ENSG00000134317	1.36453	0.0111955	0.0805534	GRHL1	stable
ENSG00000170889	-0.63466	0.0112059	0.0805818	RPS9	stable
ENSG00000056097	-0.518796	0.0112416	0.0807923	ZFR	stable
ENSG00000023572	-0.673031	0.0112663	0.0809232	GLRX2	stable
ENSG00000154319	2.61413	0.0112731	0.0809253	FAM167A	stable
ENSG00000103024	-0.610054	0.0112984	0.0810605	NME3	stable
ENSG00000176533	0.579929	0.0113374	0.0812008	GNG7	stable
ENSG00000157869	-0.762034	0.0113251	0.0812008	RAB28	stable
ENSG00000169020	-1.09855	0.0113365	0.0812008	ATP5ME	stable
ENSG00000143437	0.60924	0.0113451	0.081209	ARNT	stable
ENSG00000163938	-0.536779	0.0113661	0.0813131	GNL3	stable
ENSG00000139083	0.692717	0.0114235	0.0816764	ETV6	stable
ENSG00000124782	0.623854	0.0114333	0.0817002	RREB1	stable
ENSG00000157193	-0.548175	0.011453	0.081747	LRP8	stable
ENSG00000215788	1.12829	0.011449	0.081747	TNFRSF25	stable
ENSG00000117410	-0.529243	0.0114803	0.0817555	ATP6V0B	stable
ENSG00000105254	-0.524326	0.0114779	0.0817555	TBCB	stable
ENSG00000173706	0.604399	0.0114701	0.0817555	HEG1	stable
ENSG00000163513	0.810574	0.0114728	0.0817555	TGFBR2	stable
ENSG00000083457	-0.765074	0.0115075	0.0819022	ITGAE	stable
ENSG00000197063	0.617489	0.011535	0.0820514	MAFG	stable
ENSG00000178896	-0.569968	0.011562	0.0821501	EXOSC4	stable
ENSG00000176136	0.889665	0.0115608	0.0821501	MC5R	stable
ENSG00000143320	-0.939436	0.0115792	0.0822257	CRABP2	stable
ENSG00000122515	0.563043	0.0116048	0.0823137	ZMIZ2	stable
ENSG00000110237	0.549917	0.0116035	0.0823137	ARHGEF17	stable
ENSG00000143067	0.730632	0.0116395	0.0825133	ZNF697	stable
ENSG00000180616	1.05259	0.0117255	0.0830756	SSTR2	stable
ENSG00000198791	-0.520503	0.011798	0.0835418	CNOT7	stable
ENSG00000175137	0.587383	0.0118167	0.0836267	SH3BP5L	stable
ENSG00000008324	-0.77076	0.0118278	0.0836583	SS18L2	stable
ENSG00000164754	-0.501877	0.0118401	0.0836976	RAD21	stable
ENSG00000072071	0.616775	0.0118766	0.0839084	ADGRL1	stable
ENSG00000167110	0.535569	0.0118891	0.0839492	GOLGA2	stable
ENSG00000138658	-0.728438	0.0119111	0.084057	ZGRF1	stable
ENSG00000160710	0.702183	0.0119343	0.0840782	ADAR	stable
ENSG00000174780	-0.523098	0.0119288	0.0840782	SRP72	stable
ENSG00000172986	1.02991	0.0119292	0.0840782	GXYLT2	stable
ENSG00000197324	0.651798	0.0119919	0.0843182	LRP10	stable
ENSG00000164258	-0.657933	0.0120156	0.0843182	NDUFS4	stable
ENSG00000170382	0.655338	0.0119977	0.0843182	LRRN2	stable
ENSG00000158480	0.762702	0.0119978	0.0843182	SPATA2	stable
ENSG00000113356	-0.729773	0.0119829	0.0843182	POLR3G	stable
ENSG00000121988	-0.8907	0.012012	0.0843182	ZRANB3	stable
ENSG00000140961	0.975954	0.0120115	0.0843182	OSGIN1	stable
ENSG00000075336	-0.594583	0.0120311	0.0843797	TIMM21	stable
ENSG00000125148	0.611152	0.0120563	0.0845091	MT2A	stable
ENSG00000137054	-0.622601	0.0120681	0.0845396	POLR1E	stable
ENSG00000152520	0.704765	0.0120742	0.0845396	PAN3	stable
ENSG00000197774	0.895083	0.0120906	0.0846074	EME2	stable
ENSG00000091073	0.695516	0.0121051	0.0846613	DTX2	stable
ENSG00000162889	-0.547833	0.0122049	0.0853116	MAPKAPK2	stable
ENSG00000198346	-1.00566	0.0122224	0.0853384	ZNF813	stable
ENSG00000166106	1.59272	0.0122165	0.0853384	ADAMTS15	stable
ENSG00000108528	-0.566405	0.0122389	0.0853704	SLC25A11	stable
ENSG00000186687	-0.688595	0.0122407	0.0853704	LYRM7	stable
ENSG00000168291	-0.604538	0.0122716	0.0855381	PDHB	stable
ENSG00000173085	-0.816041	0.0122795	0.0855456	COQ2	stable
ENSG00000128731	0.524057	0.0122892	0.0855573	HERC2	stable
ENSG00000132326	0.735867	0.0122948	0.0855573	PER2	stable
ENSG00000078900	-0.723015	0.0123144	0.0856455	TP73	stable
ENSG00000006071	1.15627	0.0123306	0.0857105	ABCC8	stable
ENSG00000175550	-0.554305	0.0123495	0.0857945	DRAP1	stable
ENSG00000161638	0.725714	0.0123632	0.085842	ITGA5	stable
ENSG00000146281	-0.707216	0.0124508	0.086402	PM20D2	stable
ENSG00000011275	0.5052	0.0124938	0.0866522	RNF216	stable
ENSG00000090097	-0.547082	0.0125428	0.0868954	PCBP4	stable
ENSG00000107077	0.668436	0.0125367	0.0868954	KDM4C	stable
ENSG00000168005	-0.594333	0.0126055	0.0872814	SPINDOC	stable
ENSG00000128534	-0.634798	0.0126165	0.0872922	LSM8	stable
ENSG00000143942	-0.870633	0.012621	0.0872922	CHAC2	stable
ENSG00000059728	0.666965	0.012641	0.087382	MXD1	stable
ENSG00000138175	-0.690195	0.01266	0.0874649	ARL3	stable
ENSG00000175279	-1.469	0.0126673	0.0874676	CENPS	stable
ENSG00000171940	0.566186	0.012698	0.087486	ZNF217	stable
ENSG00000166963	0.580981	0.0126939	0.087486	MAP1A	stable
ENSG00000125482	-0.658605	0.012696	0.087486	TTF1	stable
ENSG00000133794	0.648523	0.0126776	0.087486	ARNTL	stable
ENSG00000163832	-0.628609	0.0127618	0.0878769	ELP6	stable
ENSG00000178950	0.528582	0.0128668	0.0882111	GAK	stable
ENSG00000225921	-0.5644	0.0128502	0.0882111	NOL7	stable
ENSG00000037241	-0.65012	0.0128531	0.0882111	RPL26L1	stable
ENSG00000159842	0.558588	0.012849	0.0882111	ABR	stable
ENSG00000147234	0.662907	0.0128512	0.0882111	FRMPD3	stable
ENSG00000173163	-0.691905	0.0128201	0.0882111	COMMD1	stable
ENSG00000154079	-0.991413	0.0128654	0.0882111	SDHAF4	stable
ENSG00000196636	-0.644856	0.012833	0.0882111	SDHAF3	stable
ENSG00000092847	0.529704	0.0129064	0.0883861	AGO1	stable
ENSG00000023697	-0.658952	0.0129064	0.0883861	DERA	stable
ENSG00000134716	0.820664	0.0129181	0.0884178	CYP2J2	stable
ENSG00000119403	-0.528815	0.0129296	0.0884381	PHF19	stable
ENSG00000165406	0.812947	0.0129353	0.0884381	2024-03-08	stable
ENSG00000171444	0.555539	0.0129994	0.0888281	MCC	stable
ENSG00000130844	-0.716247	0.0130349	0.0890222	ZNF331	stable
ENSG00000167670	-0.741846	0.0130468	0.0890282	CHAF1A	stable
ENSG00000114735	0.736162	0.0130501	0.0890282	HEMK1	stable
ENSG00000134909	0.556074	0.0130792	0.0891783	ARHGAP32	stable
ENSG00000122705	-0.503429	0.0131136	0.0893642	CLTA	stable
ENSG00000070759	1.62291	0.0131832	0.0897892	TESK2	stable
ENSG00000178035	-0.566788	0.0132193	0.0899865	IMPDH2	stable
ENSG00000130751	1.34672	0.0132284	0.0899995	NPAS1	stable
ENSG00000169599	-0.65506	0.0132467	0.0900746	NFU1	stable
ENSG00000164951	0.795657	0.0133	0.0903878	PDP1	stable
ENSG00000170584	-0.708806	0.0133382	0.0905492	NUDCD2	stable
ENSG00000214021	0.957385	0.0133335	0.0905492	TTLL3	stable
ENSG00000151849	-0.743786	0.0133499	0.090579	CENPJ	stable
ENSG00000186591	0.530767	0.0134121	0.0909517	UBE2H	stable
ENSG00000161547	-0.513108	0.0134305	0.0910275	SRSF2	stable
ENSG00000167384	-0.775976	0.013449	0.0911033	ZNF180	stable
ENSG00000185608	-0.583768	0.0134881	0.0913183	MRPL40	stable
ENSG00000247596	-0.657585	0.0135112	0.0913627	TWF2	stable
ENSG00000146376	0.957799	0.0135149	0.0913627	ARHGAP18	stable
ENSG00000184949	1.58877	0.0135165	0.0913627	FAM227A	stable
ENSG00000143093	0.591333	0.0135461	0.0914144	STRIP1	stable
ENSG00000153130	-0.670179	0.0135443	0.0914144	SCOC	stable
ENSG00000083814	0.790268	0.0135429	0.0914144	ZNF671	stable
ENSG00000085063	0.61016	0.0135964	0.0917042	CD59	stable
ENSG00000136878	0.620863	0.0136531	0.092037	USP20	stable
ENSG00000143799	-0.633116	0.0136714	0.0920609	PARP1	stable
ENSG00000172057	0.603113	0.0136709	0.0920609	ORMDL3	stable
ENSG00000114767	-0.592887	0.0137129	0.0922907	RRP9	stable
ENSG00000141030	-0.536292	0.0138165	0.0929308	COPS3	stable
ENSG00000179403	-0.669571	0.0138229	0.0929308	VWA1	stable
ENSG00000109536	-0.658781	0.0138603	0.0931324	FRG1	stable
ENSG00000137509	0.806116	0.0138754	0.0931337	PRCP	stable
ENSG00000149761	-0.653319	0.0138722	0.0931337	NUDT22	stable
ENSG00000155438	-0.549154	0.0139126	0.0931951	NIFK	stable
ENSG00000169255	-0.613847	0.0139144	0.0931951	B3GALNT1	stable
ENSG00000167074	0.649366	0.0139083	0.0931951	TEF	stable
ENSG00000135093	0.701549	0.0139028	0.0931951	USP30	stable
ENSG00000112339	-0.591047	0.0139303	0.0932514	HBS1L	stable
ENSG00000126432	-0.534732	0.0139476	0.0933173	PRDX5	stable
ENSG00000196353	-0.529005	0.0139581	0.0933378	CPNE4	stable
ENSG00000105220	-0.617344	0.0139722	0.0933672	GPI	stable
ENSG00000215218	2.26981	0.0139774	0.0933672	UBE2QL1	stable
ENSG00000092470	-0.802468	0.0139926	0.0934188	WDR76	stable
ENSG00000091136	0.484896	0.014031	0.0936249	LAMB1	stable
ENSG00000153207	-0.567127	0.0140511	0.0936689	AHCTF1	stable
ENSG00000112773	0.939408	0.0140526	0.0936689	TENT5A	stable
ENSG00000137497	0.493722	0.0140914	0.0938774	NUMA1	stable
ENSG00000130826	-0.543922	0.0141235	0.0939913	DKC1	stable
ENSG00000145781	-0.716908	0.0141164	0.0939913	COMMD10	stable
ENSG00000196290	-0.64932	0.0141418	0.0940127	NIF3L1	stable
ENSG00000160190	1.92864	0.0141343	0.0940127	SLC37A1	stable
ENSG00000138085	-0.544289	0.014154	0.0940441	ATRAID	stable
ENSG00000136147	1.25079	0.0141754	0.0941361	PHF11	stable
ENSG00000172602	1.06031	0.0141851	0.0941503	RND1	stable
ENSG00000131446	-0.583741	0.0142163	0.0943076	MGAT1	stable
ENSG00000008256	0.713813	0.0142355	0.0943848	CYTH3	stable
ENSG00000196305	0.49962	0.0142462	0.0944058	IARS	stable
ENSG00000110057	0.579003	0.014256	0.0944204	UNC93B1	stable
ENSG00000138434	0.52855	0.014291	0.0945909	ITPRID2	stable
ENSG00000196420	1.6688	0.0142969	0.0945909	S100A5	stable
ENSG00000177728	0.575739	0.0143823	0.0949664	TMEM94	stable
ENSG00000150768	-0.555902	0.014384	0.0949664	DLAT	stable
ENSG00000105613	0.656831	0.0143742	0.0949664	MAST1	stable
ENSG00000007384	0.702798	0.0143635	0.0949664	RHBDF1	stable
ENSG00000172586	-0.645148	0.0144226	0.0951709	CHCHD1	stable
ENSG00000198752	0.507312	0.0144661	0.095307	CDC42BPB	stable
ENSG00000184205	0.664239	0.0144613	0.095307	TSPYL2	stable
ENSG00000234616	0.520458	0.014464	0.095307	JRK	stable
ENSG00000229474	1.6009	0.0145111	0.095553	PATL2	stable
ENSG00000152147	-0.674563	0.014539	0.0956864	GEMIN6	stable
ENSG00000188060	0.715698	0.0145517	0.0957195	RAB42	stable
ENSG00000120658	1.02571	0.0145903	0.0959229	ENOX1	stable
ENSG00000164930	-0.536669	0.0146109	0.0959575	FZD6	stable
ENSG00000256229	-0.614844	0.0146103	0.0959575	ZNF486	stable
ENSG00000100519	-0.603667	0.0146255	0.0960027	PSMC6	stable
ENSG00000162736	0.499294	0.0146714	0.096148	NCSTN	stable
ENSG00000105854	-0.524747	0.0146784	0.096148	PON2	stable
ENSG00000154305	0.521211	0.0146707	0.096148	MIA3	stable
ENSG00000113615	0.5944	0.0146752	0.096148	SEC24A	stable
ENSG00000135709	0.883561	0.0147495	0.0965635	KIAA0513	stable
ENSG00000147027	0.587281	0.0147966	0.0968212	TMEM47	stable
ENSG00000066455	0.634333	0.0148977	0.0974317	GOLGA5	stable
ENSG00000117616	0.825211	0.0149275	0.097575	RSRP1	stable
ENSG00000204370	-0.56827	0.0149495	0.0976678	SDHD	stable
ENSG00000140853	0.844672	0.0149596	0.0976828	NLRC5	stable
ENSG00000169564	-0.530594	0.0150067	0.0979395	PCBP1	stable
ENSG00000137959	3.75541	0.0150392	0.0980528	IFI44L	stable
ENSG00000164346	-0.553833	0.0150529	0.0980528	NSA2	stable
ENSG00000187091	1.15839	0.0150555	0.0980528	PLCD1	stable
ENSG00000198520	1.53469	0.0150547	0.0980528	ARMH1	stable
ENSG00000049860	-0.521553	0.0150826	0.098178	HEXB	stable
ENSG00000100380	-0.553829	0.0151058	0.0982779	ST13	stable
ENSG00000127511	0.500557	0.0151441	0.0983224	SIN3B	stable
ENSG00000110108	-0.621113	0.0151287	0.0983224	TMEM109	stable
ENSG00000213398	0.896847	0.0151435	0.0983224	LCAT	stable
ENSG00000169515	-0.880041	0.015121	0.0983224	CCDC8	stable
ENSG00000118900	0.527596	0.0151557	0.0983469	UBN1	stable
ENSG00000089693	-0.516137	0.0151914	0.0984763	MLF2	stable
ENSG00000256463	0.518081	0.015187	0.0984763	SALL3	stable
ENSG00000173726	-0.500148	0.0152175	0.098543	TOMM20	stable
ENSG00000069667	0.926886	0.0152119	0.098543	RORA	stable
ENSG00000135390	-0.506731	0.0152398	0.0986364	ATP5MC2	stable
ENSG00000100075	-0.615963	0.0152664	0.0987572	SLC25A1	stable
ENSG00000132256	0.734938	0.0152786	0.0987854	TRIM5	stable
ENSG00000132963	-0.556802	0.0152933	0.0988243	POMP	stable
ENSG00000188554	0.514625	0.0153004	0.0988243	NBR1	stable
ENSG00000111961	0.542602	0.0153218	0.0989114	SASH1	stable
ENSG00000050165	0.774961	0.0153411	0.0989846	DKK3	stable
ENSG00000141522	-0.585814	0.0153535	0.0990132	ARHGDIA	stable
ENSG00000134954	0.590776	0.0153883	0.0991869	ETS1	stable
ENSG00000049245	-0.501149	0.0154359	0.0992373	VAMP3	stable
ENSG00000080822	-0.61946	0.0154072	0.0992373	CLDND1	stable
ENSG00000108479	-0.650592	0.0154263	0.0992373	GALK1	stable
ENSG00000174791	-0.648463	0.0154288	0.0992373	RIN1	stable
ENSG00000108984	0.969978	0.0154272	0.0992373	MAP2K6	stable
ENSG00000106261	0.517342	0.015476	0.0994445	ZKSCAN1	stable
ENSG00000175224	0.530301	0.0155043	0.099575	ATG13	stable
ENSG00000111196	-0.704346	0.0155188	0.0996168	MAGOHB	stable
ENSG00000185158	0.7472	0.0155885	0.100013	LRRC37B	stable
ENSG00000274523	-0.543575	0.0157162	0.100729	RCC1L	stable
ENSG00000162129	-0.599096	0.0157158	0.100729	CLPB	stable
ENSG00000125304	0.513559	0.0157278	0.100752	TM9SF2	stable
ENSG00000108055	-0.574391	0.0157568	0.100782	SMC3	stable
ENSG00000099875	0.494134	0.0157408	0.100782	MKNK2	stable
ENSG00000176971	0.593751	0.0157537	0.100782	FIBIN	stable
ENSG00000161813	-0.617195	0.015772	0.100828	LARP4	stable
ENSG00000171105	0.837665	0.0158133	0.10104	INSR	stable
ENSG00000157827	0.554639	0.0158342	0.101122	FMNL2	stable
ENSG00000142784	0.597287	0.0158427	0.101125	WDTC1	stable
ENSG00000168477	0.646085	0.015854	0.101145	TNXB	stable
ENSG00000159433	0.583999	0.015895	0.101355	STARD9	stable
ENSG00000108953	-0.505075	0.0159141	0.101425	YWHAE	stable
ENSG00000130706	-0.525329	0.0159671	0.101607	ADRM1	stable
ENSG00000114480	-0.661851	0.0159659	0.101607	GBE1	stable
ENSG00000173281	0.56026	0.0159528	0.101607	PPP1R3B	stable
ENSG00000184898	0.803725	0.0159916	0.1017	RBM43	stable
ENSG00000105246	2.37167	0.0159979	0.1017	EBI3	stable
ENSG00000114021	-0.631048	0.016019	0.101782	NIT2	stable
ENSG00000205609	4.36244	0.0160666	0.102033	EIF3CL	stable
ENSG00000167614	0.533106	0.0161029	0.102211	TTYH1	stable
ENSG00000197045	-0.60537	0.0161313	0.10234	GMFB	stable
ENSG00000166228	-0.635889	0.0161445	0.102371	PCBD1	stable
ENSG00000184304	0.668489	0.0162337	0.102885	PRKD1	stable
ENSG00000160221	-0.721119	0.0162763	0.10305	GATD3A	stable
ENSG00000149548	-0.756072	0.0162731	0.10305	CCDC15	stable
ENSG00000055044	-0.570878	0.0163185	0.103265	NOP58	stable
ENSG00000005810	0.570902	0.0163668	0.103474	MYCBP2	stable
ENSG00000100302	2.1737	0.016368	0.103474	RASD2	stable
ENSG00000157978	0.636035	0.0164175	0.103734	LDLRAP1	stable
ENSG00000282988	2.91959	0.0165011	0.104209	AL031777.3	stable
ENSG00000154734	1.21303	0.0165173	0.104259	ADAMTS1	stable
ENSG00000163528	-0.896539	0.0165381	0.104338	CHCHD4	stable
ENSG00000073849	1.87475	0.0165489	0.104353	ST6GAL1	stable
ENSG00000102309	-0.688945	0.0165913	0.104568	PIN4	stable
ENSG00000087088	-0.637759	0.0166643	0.104958	BAX	stable
ENSG00000137168	-0.545714	0.01667	0.104958	PPIL1	stable
ENSG00000169184	2.32408	0.0167076	0.105142	MN1	stable
ENSG00000145362	0.499553	0.0167459	0.105298	ANK2	stable
ENSG00000242802	0.555046	0.0167499	0.105298	AP5Z1	stable
ENSG00000155275	0.739693	0.0167577	0.105298	TRMT44	stable
ENSG00000103489	0.881187	0.0168105	0.105524	XYLT1	stable
ENSG00000153391	-0.708398	0.016807	0.105524	INO80C	stable
ENSG00000265817	2.08661	0.016833	0.105612	FSBP	stable
ENSG00000104219	-0.533002	0.0168638	0.105752	ZDHHC2	stable
ENSG00000047578	0.607309	0.016877	0.105782	KIAA0556	stable
ENSG00000116096	-0.677011	0.0169283	0.10605	SPR	stable
ENSG00000204839	1.09942	0.0169677	0.106244	MROH6	stable
ENSG00000141076	-0.515339	0.0169847	0.106244	UTP4	stable
ENSG00000122877	0.944554	0.0169829	0.106244	EGR2	stable
[truncated: 12,916 more rows]

## Sheet: shIQGAP3 vs shCONT_Down_GO
	ONTOLOGY	ID	Description	GeneRatio	BgRatio	pvalue	p.adjust	qvalue	geneID	Count
GO:0007059	BP	GO:0007059	chromosome segregation	0.112306	415/21069	1.36e-44	5.8e-41	5.02e-41	NUF2/CENPE/KIF18A/BRCA1/TTK/CENPW/SGO2/MND1/ESCO2/NDC80/NCAPG/SMC2/BCL7C/ECT2/NUSAP1/CDC6/SPAG5/KIF11/KNL1/ZWINT/SGO1/CDCA2/DSCC1/RAD18/ZWILCH/FBXO5/CENPF/TOP2A/CENPN/DLGAP5/CENPH/UBE2C/MAD2L1/BRIP1/KNTC1/TRIP13/CENPX/SKA2/PTTG1/RMI1/CENPQ/NEK2/KIF14/CDCA5/MIS18A/SKA3/KIFC1/NCAPH/HJURP/OIP5/BANF1/SKA1/RACGAP1/KIF2C/KIF4A/CCNB1/SLF1/SMC4/ANAPC11/CENPK/FEN1/BUB1/GEN1/FANCD2/RAD51C/CIAO2B/KNSTRN/SLC…	94
GO:0006261	BP	GO:0006261	DNA-templated DNA replication	0.0692951	169/21069	1.33e-38	2.82e-35	2.44e-35	GMNN/DBF4/BRCA1/BLM/CDC6/E2F7/RFC4/GINS2/WDHD1/POLE4/DSCC1/FBXO5/ORC1/RRM1/RFC3/POLE2/RBBP8/MCM10/DONSON/CENPX/RECQL4/DNA2/MCM8/POLQ/CDC45/CDC7/PCNA/POLA2/TOPBP1/ATAD5/RFC5/MMS22L/FEN1/GEN1/ALYREF/SETMAR/PRIM1/MCM2/TICRR/RFC2/ORC6/MCM7/BRCA2/MRE11/GINS4/CDK2/PRIM2/DBF4B/GINS1/MCM4/CDT1/POLD2/TIPIN/GINS3/NUCKS1/E2F8/ENDOG/MCM5	58
GO:0140014	BP	GO:0140014	mitotic nuclear division	0.0943847	357/21069	9.59e-37	1.36e-33	1.18e-33	NUF2/CENPE/KIF18A/KIF20B/TTK/SGO2/ESCO2/NDC80/NCAPG/SMC2/ANLN/BCL7C/NUSAP1/CDC6/SPAG5/KIF11/UBE2S/ZWINT/SGO1/CDCA2/DSCC1/ZWILCH/FBXO5/CENPF/DLGAP5/CHEK1/UBE2C/MAD2L1/KIF15/KNTC1/TRIP13/PTTG1/RANBP1/NEK2/KIF14/CDCA5/KIFC1/NCAPH/BANF1/RACGAP1/KIF2C/KIF4A/CCNB1/SLF1/SMC4/ANAPC11/CENPK/BUB1/GEN1/AURKAIP1/KNSTRN/MYBL2/MAD2L2/AURKB/SPC25/SPC24/PKMYT1/REEP3/BUB1B/MKI67/KIF22/PIN1/NCAPG2/KIF23/ESPL1/KPNB…	79
GO:0006260	BP	GO:0006260	DNA replication	0.0848268	308/21069	2.63e-34	1.87e-31	1.62e-31	GMNN/CDK1/DBF4/FAM111B/BRCA1/BLM/ESCO2/PCLAF/CDC6/E2F7/RFC4/GINS2/WDHD1/POLE4/DSCC1/DUT/DTL/FBXO5/RPA3/CCNA2/ORC1/CHEK1/RRM1/RRM2/RFC3/POLE2/RBBP8/MCM10/DONSON/CENPX/RECQL4/DNA2/MCM8/RMI1/POLQ/CDC45/CDC7/PCNA/POLA2/TOPBP1/ATAD5/RFC5/MMS22L/FEN1/GEN1/ALYREF/SETMAR/PRIM1/MCM2/TICRR/RFC2/ORC6/MCM7/BRCA2/MRE11/GINS4/CDK2/CHAF1B/PRIM2/DBF4B/GINS1/MCM4/CDT1/POLD2/TIPIN/GINS3/INO80E/NUCKS1/E2F8/ENDOG/MC…	71
GO:0006119	BP	GO:0006119	oxidative phosphorylation	0.0609319	168/21069	4.12e-31	2.19e-28	1.89e-28	COX8A/CDK1/COX6A1/ATP5MF/COX7A2/NDUFB2/NDUFA6/ATP5PB/NDUFS6/NDUFA8/UQCRQ/NDUFB7/UQCR11/NDUFB8/NDUFA1/NDUFS5/ATP5PD/NDUFA4/CHCHD2/COX6C/ATP5MG/UQCR10/UQCC3/ATP5F1E/NDUFC2/NDUFC1/CCNB1/COX7C/ATP5F1C/UQCRH/CYCS/PARK7/NDUFA3/ATP5PO/NDUFB6/COX5A/COX5B/NDUFB11/NDUFA2/COX6B1/NDUFA11/NDUFA12/NDUFB9/DNAJC15/MSH2/ATP5F1B/NDUFAB1/NDUFS7/COX7B/NDUFB3/COX3	51
GO:0007093	BP	GO:0007093	mitotic cell cycle checkpoint signaling	0.0549582	164/21069	1.63e-26	5.32e-24	4.61e-24	NUF2/CDK1/BRCA1/TTK/BLM/NDC80/CDC6/PBK/ZWINT/ZWILCH/DTL/CENPF/CLSPN/ORC1/CHEK1/MAD2L1/RBBP8/KNTC1/TRIP13/DONSON/CDKN1A/CCNG1/TOPBP1/CCNB1/NABP2/GTSE1/BUB1/GEN1/FANCD2/SETMAR/MAD2L2/AURKB/TICRR/SPC25/SPC24/BUB1B/MRE11/CDK2/BRCC3/TRIAP1/MSH2/HASPIN/CDT1/PLK1/TIPIN/NAE1	46
GO:0022904	BP	GO:0022904	respiratory electron transport chain	0.0501792	137/21069	5.12e-26	1.36e-23	1.18e-23	COX8A/CDK1/COX6A1/COX7A2/NDUFB2/NDUFA6/NDUFS6/NDUFA8/UQCRQ/NDUFB7/UQCR11/NDUFB8/NDUFA1/NDUFS5/NDUFA4/CHCHD2/COX6C/UQCR10/UQCC3/NDUFC2/GPD2/NDUFC1/CCNB1/COX7C/UQCRH/CYCS/PARK7/NDUFA3/ETFB/NDUFB6/COX5A/COX5B/NDUFA2/COX6B1/NDUFA12/NDUFB9/DNAJC15/NDUFAB1/NDUFS7/COX7B/NDUFB3/COX3	42
GO:0006302	BP	GO:0006302	double-strand break repair	0.0681004	315/21069	3.99e-22	6.53e-20	5.65e-20	RAD51AP1/BRCA1/HMGB1/HMGB2/BLM/ESCO2/BCL7C/GINS2/DEK/RPA3/H2AX/CHEK1/RBBP8/BRIP1/TRIP13/AUNIP/RECQL4/DNA2/MCM8/RMI1/CDCA5/POLQ/CDC45/CDC7/RAD54L/SLF1/UBE2N/FOXM1/NABP2/MMS22L/PARPBP/SHLD2/FEN1/GEN1/FANCD2/RAD51C/UBE2V2/XRCC2/SETMAR/FANCB/MAD2L2/MCM2/PAXX/MCM7/BRCA2/XRCC6/MRE11/GINS4/BRCC3/MSH2/MCM4/TEX15/HMCES/DCLRE1A/HPF1/NUCKS1/MCM5	57
GO:0000725	BP	GO:0000725	recombinational repair	0.0454002	181/21069	2.09e-17	1.46e-15	1.26e-15	RAD51AP1/BRCA1/BLM/GINS2/RPA3/H2AX/CHEK1/RBBP8/AUNIP/RECQL4/MCM8/RMI1/POLQ/CDC45/CDC7/RAD54L/SLF1/UBE2N/NABP2/MMS22L/PARPBP/SHLD2/FEN1/GEN1/RAD51C/XRCC2/FANCB/MAD2L2/MCM2/MCM7/BRCA2/XRCC6/MRE11/GINS4/MCM4/TEX15/NUCKS1/MCM5	38
GO:0042770	BP	GO:0042770	signal transduction in response to DNA damage	0.037037	212/21069	3.65e-10	1.19e-08	1.03e-08	CDK1/BRCA1/BLM/E2F7/PBK/DTL/H2AX/CLSPN/CHEK1/RNASEH2B/BRIP1/DONSON/CDKN1A/CCNG1/NPM1/TOPBP1/ATAD5/FOXM1/GTSE1/FANCD2/MAD2L2/TICRR/BRCA2/MRE11/CDK2/BRCC3/TRIAP1/MSH2/PLK1/TIPIN/EEF1E1	31
