# Supplementary material
Source: Research Square preprint supplement (doi:10.21203/rs.3.rs-6009404/v1)
Supplement: Supplementary file 10 [file c731c92177a394b7c4ea28ce.xlsx]

## Sheet: radio_stiff_vs_soft_LFC0.585
stiff vs. soft (IR 2GY/48h)
	log2FoldChange	pvalue	padj	gene_name	group	log10(padj)
ENSG00000152583	-1.68074	0	0	SPARCL1	down	Inf
ENSG00000128342	2.38119	0	0	LIF	up	Inf
ENSG00000135046	2.96934	0	0	ANXA1	up	Inf
ENSG00000265972	-1.68712	0	0	TXNIP	down	Inf
ENSG00000106366	3.12963	0	0	SERPINE1	up	Inf
ENSG00000006327	1.86348	0	0	TNFRSF12A	up	Inf
ENSG00000184489	-1.74129	0	0	PTP4A3	down	Inf
ENSG00000126709	-2.39096	0	0	IFI6	down	Inf
ENSG00000129244	-2.42171	0	0	ATP1B2	down	Inf
ENSG00000145390	2.35706	0	0	USP53	up	Inf
ENSG00000135821	-1.27153	4.44651e-306	5.89607e-303	GLUL	down	302.229
ENSG00000175899	-1.32149	2.07892e-275	2.52693e-272	A2M	down	271.597
ENSG00000114646	-2.07527	3.73744e-275	4.19341e-272	CSPG5	down	271.377
ENSG00000137801	2.36617	2.02548e-265	2.11026e-262	THBS1	up	261.676
ENSG00000104419	-1.39542	6.00199e-252	5.83633e-249	NDRG1	down	248.234
ENSG00000026508	1.79612	2.76784e-247	2.52323e-244	CD44	up	243.598
ENSG00000182103	-1.59062	3.87786e-243	3.3272e-240	FAM181B	down	239.478
ENSG00000135744	-1.7228	8.28198e-242	6.71116e-239	AGT	down	238.173
ENSG00000115461	1.57153	1.58805e-237	1.21912e-234	IGFBP5	up	233.914
ENSG00000149212	-1.46328	8.06926e-219	5.88491e-216	SESN3	down	215.23
ENSG00000142627	1.36063	2.55076e-207	1.77169e-204	EPHA2	up	203.752
ENSG00000059804	-1.41471	4.32725e-204	2.86897e-201	SLC2A3	down	200.542
ENSG00000125851	-1.70396	3.71478e-199	2.35581e-196	PCSK2	down	195.628
ENSG00000160307	-1.49589	1.16992e-193	7.11021e-191	S100B	down	190.148
ENSG00000154678	1.5709	7.85e-191	4.58e-188	PDE1C	up	187.339
ENSG00000162692	-1.42556	2.38795e-189	1.33964e-186	VCAM1	down	185.873
ENSG00000091129	1.36346	3.46805e-183	1.87352e-180	NRCAM	up	179.727
ENSG00000135424	1.15573	2.23764e-169	1.16565e-166	ITGA7	up	165.933
ENSG00000101670	1.53418	4.87978e-169	2.45436e-166	LIPG	up	165.61
ENSG00000120738	1.13391	2.74955e-167	1.33683e-164	EGR1	up	163.874
ENSG00000205542	0.883913	1.91323e-163	9.00206e-161	TMSB4X	up	160.046
ENSG00000185745	-1.92626	1.47798e-161	6.7368e-159	IFIT1	down	158.172
ENSG00000170439	1.38714	1.79037e-158	7.91341e-156	METTL7B	up	155.102
ENSG00000153904	1.23748	3.90664e-154	1.67595e-151	DDAH1	up	150.776
ENSG00000204592	-1.22636	6.85784e-151	2.85796e-148	HLA-E	down	147.544
ENSG00000078549	-1.96191	7.15456e-150	2.89879e-147	ADCYAP1R1	down	146.538
ENSG00000119922	-1.52224	1.23804e-149	4.88054e-147	IFIT2	down	146.312
ENSG00000105270	-1.78833	4.29484e-149	1.64854e-146	CLIP3	down	145.783
ENSG00000130303	-3.36639	5.09017e-145	1.90372e-142	BST2	down	141.72
ENSG00000151835	1.21776	6.43375e-140	2.34607e-137	SACS	up	136.63
ENSG00000114019	2.31945	5.67371e-139	2.01846e-136	AMOTL2	up	135.695
ENSG00000076706	1.00552	2.47507e-137	8.59557e-135	MCAM	up	134.066
ENSG00000187122	-1.27034	6.09319e-137	2.06687e-134	SLIT1	down	133.685
ENSG00000173917	1.20752	5.44375e-135	1.8046e-132	HOXB2	up	131.744
ENSG00000123933	-1.47421	1.94307e-132	6.29814e-130	MXD4	down	129.201
ENSG00000131981	-0.983175	4.15038e-130	1.31603e-127	LGALS3	down	126.881
ENSG00000171951	0.868553	7.99404e-129	2.48087e-126	SCG2	up	125.605
ENSG00000142871	4.54262	4.5235e-127	1.37458e-124	CYR61	up	123.862
ENSG00000137959	-2.37368	3.33286e-123	9.92105e-121	IFI44L	down	120.003
ENSG00000147526	0.944481	7.29418e-118	2.12786e-115	TACC1	up	114.672
ENSG00000095015	-1.35802	1.02662e-116	2.93612e-114	MAP3K1	down	113.532
ENSG00000160949	0.977215	2.8222e-116	7.91626e-114	TONSL	up	113.101
ENSG00000118432	-0.992601	2.30225e-115	6.33598e-113	CNR1	down	112.198
ENSG00000130707	1.16577	5.90573e-113	1.5952e-110	ASS1	up	109.797
ENSG00000126562	3.76638	6.38651e-113	1.6937e-110	WNK4	up	109.771
ENSG00000177469	0.901393	1.86058e-112	4.84616e-110	CAVIN1	up	109.315
ENSG00000160957	0.895214	2.71006e-112	6.9349e-110	RECQL4	up	109.159
ENSG00000136160	-1.42094	1.27176e-111	3.19824e-109	EDNRB	down	108.495
ENSG00000159200	1.30132	5.16994e-111	1.27811e-108	RCAN1	up	107.893
ENSG00000123700	3.36367	3.19601e-108	7.76949e-106	KCNJ2	up	105.11
ENSG00000163545	1.55628	1.36101e-107	3.25438e-105	NUAK2	up	104.488
ENSG00000104415	-0.827953	5.03275e-107	1.18399e-104	WISP1	down	103.927
ENSG00000013573	1.13566	1.01635e-106	2.35309e-104	DDX11	up	103.628
ENSG00000198888	0.754026	3.03415e-106	6.91502e-104	MT-ND1	up	103.16
ENSG00000105281	0.893916	4.44902e-106	9.98359e-104	SLC1A5	up	103.001
ENSG00000108691	1.219	5.28753e-106	1.16854e-103	CCL2	up	102.932
ENSG00000116285	1.15309	7.9996e-106	1.74153e-103	ERRFI1	up	102.759
ENSG00000050165	-1.15239	3.29845e-104	7.07517e-102	DKK3	down	101.15
ENSG00000135916	-0.993557	3.45285e-104	7.29902e-102	ITM2C	down	101.137
ENSG00000187608	-1.45814	1.18699e-103	2.47335e-101	ISG15	down	100.607
ENSG00000100427	-0.865651	2.03116e-103	4.17275e-101	MLC1	down	100.38
ENSG00000101361	0.853648	2.07586e-102	4.20534e-100	NOP56	up	99.3762
ENSG00000164733	-0.889094	6.99437e-102	1.39753e-99	CTSB	down	98.8546
ENSG00000105223	-0.82371	3.62165e-101	7.13857e-99	PLD3	down	98.1464
ENSG00000168502	1.50017	7.9437e-101	1.54489e-98	MTCL1	up	97.8111
ENSG00000188916	1.35907	1.26385e-97	2.4256e-95	INSYN2	up	94.6152
ENSG00000101057	0.947953	3.03024e-97	5.74013e-95	MYBL2	up	94.2411
ENSG00000075618	-0.674351	1.6144e-96	3.01893e-94	FSCN1	down	93.5201
ENSG00000180801	1.31817	4.89585e-96	9.03935e-94	ARSJ	up	93.0439
ENSG00000110092	0.950682	2.69584e-95	4.9152e-93	CCND1	up	92.3085
ENSG00000090339	-1.08709	5.7748e-94	1.03989e-91	ICAM1	down	90.983
ENSG00000168615	0.860923	1.6148e-93	2.87238e-91	ADAM9	up	90.5418
ENSG00000087086	-0.817545	2.30178e-93	4.04503e-91	FTL	down	90.3931
ENSG00000103257	1.00303	2.75809e-93	4.78923e-91	SLC7A5	up	90.3197
ENSG00000105373	-0.934878	5.33249e-93	9.15056e-91	NOP53	down	90.0386
ENSG00000108840	-1.04445	8.60672e-93	1.45974e-90	HDAC5	down	89.8357
ENSG00000171848	1.1788	2.33048e-91	3.90717e-89	RRM2	up	88.4081
ENSG00000075426	1.10065	2.84679e-91	4.71856e-89	FOSL2	up	88.3262
ENSG00000108679	-0.828	3.49555e-91	5.72877e-89	LGALS3BP	down	88.2419
ENSG00000146670	0.893319	7.47411e-91	1.19799e-88	CDCA5	up	87.9215
ENSG00000176533	-1.08331	7.45505e-91	1.19799e-88	GNG7	down	87.9215
ENSG00000075213	1.17236	1.5988e-90	2.53479e-88	SEMA3A	up	87.5961
ENSG00000174791	1.09156	9.16281e-90	1.43708e-87	RIN1	up	86.8425
ENSG00000115641	1.96723	1.6858e-89	2.61586e-87	FHL2	up	86.5824
ENSG00000168824	1.43192	2.07767e-89	3.18998e-87	NSG1	up	86.4962
ENSG00000129946	-1.39405	6.15748e-89	9.35553e-87	SHC2	down	86.0289
ENSG00000188554	-1.07741	2.71469e-88	4.0821e-86	NBR1	down	85.3891
ENSG00000137509	-0.893845	8.09897e-88	1.20542e-85	PRCP	down	84.9189
ENSG00000127564	1.34006	2.70515e-87	3.98559e-85	PKMYT1	up	84.3995
ENSG00000124785	-1.11489	5.85006e-86	8.5329e-84	NRN1	down	83.0689
ENSG00000104765	-1.01578	1.27339e-85	1.83898e-83	BNIP3L	down	82.7354
ENSG00000181218	-1.90705	3.32245e-85	4.7511e-83	HIST3H2A	down	82.3232
ENSG00000120885	-0.716034	3.67018e-85	5.14742e-83	CLU	down	82.2884
ENSG00000116717	0.869414	3.65986e-85	5.14742e-83	GADD45A	up	82.2884
ENSG00000198887	0.825825	3.87866e-85	5.38802e-83	SMC5	up	82.2686
ENSG00000113070	1.50404	4.36511e-85	6.00656e-83	HBEGF	up	82.2214
ENSG00000162873	-0.750589	1.12768e-84	1.53723e-82	KLHDC8A	down	81.8133
ENSG00000134531	1.04231	7.43139e-84	1.00365e-81	EMP1	up	80.9984
ENSG00000150687	2.00311	8.80658e-84	1.17847e-81	PRSS23	up	80.9287
ENSG00000132688	0.631431	2.56592e-83	3.40241e-81	NES	up	80.4682
ENSG00000170390	-1.14195	4.5678e-83	6.00233e-81	DCLK2	down	80.2217
ENSG00000159388	-1.11328	1.12053e-82	1.45929e-80	BTG2	down	79.8359
ENSG00000033327	-1.03226	1.38892e-82	1.79281e-80	GAB2	down	79.7465
ENSG00000013364	-1.33757	2.9315e-82	3.75078e-80	MVP	down	79.4259
ENSG00000171877	1.28462	3.66057e-82	4.64288e-80	FRMD5	up	79.3332
ENSG00000091592	-1.04325	4.48346e-82	5.63757e-80	NLRP1	down	79.2489
ENSG00000167191	-0.952731	7.56443e-82	9.43033e-80	GPRC5B	down	79.0255
ENSG00000129474	1.01665	3.43793e-81	4.24964e-79	AJUBA	up	78.3716
ENSG00000151012	1.59751	8.98413e-81	1.1012e-78	SLC7A11	up	77.9581
ENSG00000123989	-0.821602	6.00819e-80	7.30296e-78	CHPF	down	77.1365
ENSG00000117139	-0.931699	1.04243e-79	1.2566e-77	KDM5B	down	76.9008
ENSG00000078018	-0.756263	1.23934e-79	1.48173e-77	MAP2	down	76.8292
ENSG00000169783	-1.58343	7.82094e-79	9.27449e-77	LINGO1	down	76.0327
ENSG00000167553	0.738339	1.56895e-78	1.84554e-76	TUBA1C	up	75.7339
ENSG00000108829	0.746575	2.30533e-78	2.69004e-76	LRRC59	up	75.5702
ENSG00000021300	-1.30951	2.58377e-78	2.99102e-76	PLEKHB1	down	75.5242
ENSG00000103187	0.78472	1.23723e-77	1.42096e-75	COTL1	up	74.8474
ENSG00000198535	-1.44889	1.35272e-77	1.54147e-75	C2CD4A	down	74.8121
ENSG00000130733	-1.16003	2.1881e-77	2.47408e-75	YIPF2	down	74.6066
ENSG00000276043	0.785199	7.65318e-77	8.58687e-75	UHRF1	up	74.0662
ENSG00000160072	0.972504	1.58558e-76	1.76544e-74	ATAD3B	up	73.7531
ENSG00000104899	1.10507	4.42288e-76	4.88729e-74	AMH	up	73.3109
ENSG00000164300	-1.1525	1.10302e-75	1.20967e-73	SERINC5	down	72.9173
ENSG00000180573	-2.28756	1.2106e-75	1.31775e-73	HIST1H2AC	down	72.8802
ENSG00000198961	-0.761671	1.63001e-75	1.76113e-73	PJA2	down	72.7542
ENSG00000167614	-0.865317	1.70645e-74	1.83017e-72	TTYH1	down	71.7375
ENSG00000157110	0.949384	2.44591e-74	2.60409e-72	RBPMS	up	71.5843
ENSG00000139278	1.40453	4.56524e-74	4.82526e-72	GLIPR1	up	71.3165
ENSG00000151474	1.22341	1.95733e-73	2.05393e-71	FRMD4A	up	70.6874
ENSG00000166482	0.886708	2.4045e-73	2.50515e-71	MFAP4	up	70.6012
ENSG00000134853	-1.14255	5.15306e-72	5.33068e-70	PDGFRA	down	69.2732
ENSG00000125885	0.911672	5.33164e-72	5.47657e-70	MCM8	up	69.2615
ENSG00000103966	1.29986	1.35341e-71	1.38048e-69	EHD4	up	68.86
ENSG00000064300	-1.83875	1.84897e-71	1.87286e-69	NGFR	down	68.7275
ENSG00000127586	0.863054	3.07109e-71	3.0893e-69	CHTF18	up	68.5101
ENSG00000136997	0.801503	3.41432e-71	3.41105e-69	MYC	up	68.4671
ENSG00000167670	0.76586	4.76165e-71	4.72472e-69	CHAF1A	up	68.3256
ENSG00000104885	0.882424	7.17566e-71	7.0719e-69	DOT1L	up	68.1505
ENSG00000186575	0.998709	9.40611e-71	9.20789e-69	NF2	up	68.0358
ENSG00000189060	-0.69188	9.78154e-71	9.51157e-69	H1F0	down	68.0217
ENSG00000146950	0.84534	1.09938e-70	1.06195e-68	SHROOM2	up	67.9739
ENSG00000167772	-2.84752	1.21809e-70	1.16889e-68	ANGPTL4	down	67.9322
ENSG00000102109	-1.43178	4.01823e-70	3.83072e-68	PCSK1N	down	67.4167
ENSG00000168743	-1.25793	5.89654e-70	5.58486e-68	NPNT	down	67.253
ENSG00000132640	-0.806452	6.79721e-70	6.3964e-68	BTBD3	down	67.1941
ENSG00000196230	0.577425	8.10365e-70	7.57691e-68	TUBB	stable	67.1205
ENSG00000161996	1.16096	1.16952e-69	1.08654e-67	WDR90	up	66.964
ENSG00000148180	-0.787442	1.57235e-68	1.45154e-66	GSN	down	65.8382
ENSG00000196305	0.693421	1.82364e-68	1.67294e-66	IARS	up	65.7765
ENSG00000197586	0.764662	2.32949e-68	2.12363e-66	ENTPD6	up	65.6729
ENSG00000100345	0.875557	7.94925e-68	7.20173e-66	MYH9	up	65.1426
ENSG00000156802	0.705012	1.28833e-67	1.15998e-65	ATAD2	up	64.9356
ENSG00000109472	-0.837244	1.39085e-67	1.24459e-65	CPE	down	64.905
ENSG00000164099	1.00581	1.40137e-67	1.24636e-65	PRSS12	up	64.9044
ENSG00000090932	-1.11819	1.41092e-67	1.24725e-65	DLL3	down	64.904
ENSG00000146278	-1.63915	2.80304e-67	2.46296e-65	PNRC1	down	64.6085
ENSG00000140525	0.75249	4.3854e-67	3.83026e-65	FANCI	up	64.4168
ENSG00000115053	0.663957	5.12887e-67	4.45296e-65	NCL	up	64.3514
ENSG00000094804	0.986716	6.06851e-67	5.23759e-65	CDC6	up	64.2809
ENSG00000100100	-2.75832	7.49158e-67	6.42777e-65	PIK3IP1	down	64.1919
ENSG00000010278	-0.854803	8.72697e-67	7.44396e-65	CD9	down	64.1282
ENSG00000171766	-0.826457	9.14713e-67	7.75698e-65	GATM	down	64.1103
ENSG00000065320	1.04274	1.35065e-66	1.13876e-64	NTN1	up	63.9436
ENSG00000147408	-1.02192	1.49294e-66	1.2515e-64	CSGALNACT1	down	63.9026
ENSG00000160818	1.05046	2.81565e-66	2.3468e-64	GPATCH4	up	63.6295
ENSG00000185215	-0.747888	4.97856e-66	4.12598e-64	TNFAIP2	down	63.3845
ENSG00000183044	-1.36734	5.86114e-66	4.82998e-64	ABAT	down	63.3161
ENSG00000150625	-0.810858	6.21328e-66	5.0914e-64	GPM6A	down	63.2932
ENSG00000159167	-1.46315	6.67337e-66	5.43787e-64	STC1	down	63.2646
ENSG00000089127	-1.34313	7.15912e-66	5.80128e-64	OAS1	down	63.2365
ENSG00000197921	-2.24928	1.9192e-65	1.5466e-63	HES5	down	62.8106
ENSG00000037897	0.647285	2.23133e-65	1.78826e-63	METTL1	up	62.7476
ENSG00000046653	-0.65274	2.30701e-65	1.8388e-63	GPM6B	down	62.7355
ENSG00000122952	0.958024	5.08506e-65	4.03102e-63	ZWINT	up	62.3946
ENSG00000057019	0.939633	5.49187e-65	4.32997e-63	DCBLD2	up	62.3635
ENSG00000115758	0.787503	6.965e-65	5.46191e-63	ODC1	up	62.2627
ENSG00000138074	0.953295	8.76207e-65	6.83441e-63	SLC5A6	up	62.1653
ENSG00000120254	0.918173	9.00304e-65	6.98502e-63	MTHFD1L	up	62.1558
ENSG00000177697	0.721245	1.22619e-64	9.46306e-63	CD151	up	62.024
ENSG00000168268	0.672268	1.36409e-64	1.04719e-62	NT5DC2	up	61.98
ENSG00000175183	1.1357	1.53757e-64	1.17419e-62	CSRP2	up	61.9303
ENSG00000132507	0.653907	2.29993e-64	1.74723e-62	EIF5A	up	61.7577
ENSG00000149295	0.814395	6.7236e-64	5.08137e-62	DRD2	up	61.294
ENSG00000151276	0.98476	1.75971e-63	1.32305e-61	MAGI1	up	60.8784
ENSG00000163346	-1.12518	1.86681e-63	1.39637e-61	PBXIP1	down	60.855
ENSG00000035403	0.908311	1.94305e-63	1.44599e-61	VCL	up	60.8398
ENSG00000184678	-2.58505	2.75968e-63	2.04328e-61	HIST2H2BE	down	60.6897
ENSG00000187244	-1.15724	4.29452e-63	3.16363e-61	BCAM	down	60.4998
ENSG00000159840	0.742483	7.7126e-63	5.65307e-61	ZYX	up	60.2477
ENSG00000063046	-0.638567	8.57981e-63	6.25725e-61	EIF4B	down	60.2036
ENSG00000166508	0.598035	8.77515e-63	6.36788e-61	MCM7	up	60.196
ENSG00000075624	0.54546	8.9098e-63	6.43358e-61	ACTB	stable	60.1915
ENSG00000164045	1.12721	2.34233e-62	1.68302e-60	CDC25A	up	59.7739
ENSG00000017483	1.29473	3.0183e-62	2.15808e-60	SLC38A5	up	59.6659
ENSG00000198886	0.601661	5.29676e-62	3.76871e-60	MT-ND4	up	59.4238
ENSG00000105855	0.941256	6.29246e-62	4.45543e-60	ITGB8	up	59.3511
ENSG00000166340	-0.914383	9.86827e-62	6.95355e-60	TPP1	down	59.1578
ENSG00000167996	-0.571956	4.75789e-61	3.33647e-59	FTH1	stable	58.4767
ENSG00000205336	-0.839926	4.8899e-61	3.41264e-59	ADGRG1	down	58.4669
ENSG00000135404	0.692937	1.02249e-60	7.10195e-59	CD63	up	58.1486
ENSG00000072110	0.745856	1.05832e-60	7.31598e-59	ACTN1	up	58.1357
ENSG00000143198	-1.16125	1.93453e-60	1.33099e-58	MGST3	down	57.8758
ENSG00000198727	0.555202	2.64358e-60	1.8103e-58	MT-CYB	stable	57.7423
ENSG00000197451	0.657604	4.45821e-60	3.03867e-58	HNRNPAB	up	57.5173
ENSG00000056558	1.16904	9.06995e-60	6.15322e-58	TRAF1	up	57.2109
ENSG00000133466	-1.26933	1.27003e-59	8.57625e-58	C1QTNF6	down	57.0667
ENSG00000166710	-0.718138	2.54188e-59	1.70856e-57	B2M	down	56.7674
ENSG00000100095	-1.50222	2.92622e-59	1.95788e-57	SEZ6L	down	56.7082
ENSG00000111371	0.710151	2.98211e-59	1.98617e-57	SLC38A1	up	56.702
ENSG00000106105	0.642478	4.37847e-59	2.90293e-57	GARS	up	56.5372
ENSG00000102804	-0.728151	5.46411e-59	3.60631e-57	TSC22D1	down	56.4429
ENSG00000172893	0.62357	6.2709e-59	4.12015e-57	DHCR7	up	56.3851
ENSG00000183684	0.861693	7.57096e-59	4.95202e-57	ALYREF	up	56.3052
ENSG00000122884	-1.01263	1.30349e-58	8.48783e-57	P4HA1	down	56.0712
ENSG00000085999	1.19514	2.93893e-58	1.90521e-56	RAD54L	up	55.7201
ENSG00000187840	0.672726	3.02522e-58	1.95247e-56	EIF4EBP1	up	55.7094
ENSG00000167617	-1.57078	3.44184e-58	2.21157e-56	CDC42EP5	down	55.6553
ENSG00000137054	0.961506	3.68812e-58	2.35943e-56	POLR1E	up	55.6272
ENSG00000030582	-0.731385	4.80206e-58	3.05864e-56	GRN	down	55.5145
ENSG00000115415	-0.708509	6.79849e-58	4.31142e-56	STAT1	down	55.3654
ENSG00000134873	-1.89557	1.51092e-57	9.54037e-56	CLDN10	down	55.0204
ENSG00000198763	0.717759	2.2422e-57	1.40968e-55	MT-ND2	up	54.8509
ENSG00000109099	0.7154	4.25006e-57	2.66057e-55	PMP22	up	54.575
ENSG00000101210	-0.809836	1.35451e-56	8.44313e-55	EEF1A2	down	54.0735
ENSG00000196365	0.578249	1.87995e-56	1.16685e-54	LONP1	stable	53.933
ENSG00000253729	0.748431	2.58078e-56	1.59505e-54	PRKDC	up	53.7972
ENSG00000117395	0.898092	3.29726e-56	2.02927e-54	EBNA1BP2	up	53.6927
ENSG00000106278	-0.571988	3.8516e-56	2.36048e-54	PTPRZ1	stable	53.627
ENSG00000204394	0.603716	6.06124e-56	3.69913e-54	VARS	up	53.4319
ENSG00000167747	0.702809	7.1212e-56	4.32791e-54	C19orf48	up	53.3637
ENSG00000166197	0.679901	8.44698e-56	5.11235e-54	NOLC1	up	53.2914
ENSG00000128965	1.15563	8.89501e-56	5.36127e-54	CHAC1	up	53.2707
ENSG00000133657	0.810812	1.72046e-55	1.0327e-53	ATP13A3	up	52.986
ENSG00000106484	0.730383	2.99041e-55	1.78763e-53	MEST	up	52.7477
ENSG00000104870	-1.2371	6.59264e-55	3.92491e-53	FCGRT	down	52.4062
ENSG00000135452	-0.604956	9.48923e-55	5.62642e-53	TSPAN31	down	52.2498
ENSG00000204525	-0.772496	1.18448e-54	6.99464e-53	HLA-C	down	52.1552
ENSG00000102316	-0.723984	1.55506e-54	9.14603e-53	MAGED2	down	52.0388
ENSG00000148154	0.740552	2.75846e-54	1.61586e-52	UGCG	up	51.7916
ENSG00000167900	0.911473	4.91085e-54	2.86519e-52	TK1	up	51.5428
ENSG00000141526	-1.87172	6.20614e-54	3.60649e-52	SLC16A3	down	51.4429
ENSG00000134243	-0.672818	7.57532e-54	4.38466e-52	SORT1	down	51.3581
ENSG00000277443	-0.547174	7.92054e-54	4.56636e-52	MARCKS	stable	51.3404
ENSG00000171793	0.8225	9.66916e-54	5.55253e-52	CTPS1	up	51.2555
ENSG00000175040	0.67989	1.0076e-53	5.76349e-52	CHST2	up	51.2393
ENSG00000175592	1.73639	1.25902e-53	7.17344e-52	FOSL1	up	51.1443
ENSG00000138835	-0.794639	1.43461e-53	8.14208e-52	RGS3	down	51.0893
ENSG00000164683	-0.893425	1.44553e-53	8.17226e-52	HEY1	down	51.0877
ENSG00000163638	0.808054	1.86254e-53	1.04892e-51	ADAMTS9	up	50.9793
ENSG00000138606	-0.899337	2.11005e-53	1.18374e-51	SHF	down	50.9267
ENSG00000162512	-0.672943	3.00743e-53	1.6807e-51	SDC3	down	50.7745
ENSG00000133112	-0.662624	5.40566e-53	3.00943e-51	TPT1	down	50.5215
ENSG00000196628	-0.723842	5.48514e-53	3.04206e-51	TCF4	down	50.5168
ENSG00000144136	0.682339	7.47909e-53	4.1322e-51	SLC20A1	up	50.3838
ENSG00000105649	-1.75355	8.22429e-53	4.52677e-51	RAB3A	down	50.3442
ENSG00000138764	-1.52525	1.06325e-52	5.8303e-51	CCNG2	down	50.2343
ENSG00000150938	0.784336	1.68188e-52	9.18796e-51	CRIM1	up	50.0368
ENSG00000163811	0.789427	1.78245e-52	9.70106e-51	WDR43	up	50.0132
ENSG00000130826	0.809178	1.93209e-52	1.04764e-50	DKC1	up	49.9798
ENSG00000198576	0.668915	2.00273e-52	1.08192e-50	ARC	up	49.9658
ENSG00000150991	-0.562184	2.19621e-52	1.18207e-50	UBC	stable	49.9274
ENSG00000261236	0.639862	2.30032e-52	1.23355e-50	BOP1	up	49.9088
ENSG00000103335	0.927942	2.35773e-52	1.2597e-50	PIEZO1	up	49.8997
ENSG00000104635	0.628024	2.38073e-52	1.26735e-50	SLC39A14	up	49.8971
ENSG00000122566	0.583677	2.53932e-52	1.34637e-50	HNRNPA2B1	stable	49.8708
ENSG00000149948	1.5297	2.54763e-52	1.34637e-50	HMGA2	up	49.8708
ENSG00000116649	0.767387	3.09118e-52	1.62773e-50	SRM	up	49.7884
ENSG00000139793	1.53261	3.20173e-52	1.67987e-50	MBNL2	up	49.7747
ENSG00000137965	-1.35202	3.33519e-52	1.74362e-50	IFI44	down	49.7585
ENSG00000170271	-2.62917	3.9127e-52	2.03824e-50	FAXDC2	down	49.6907
ENSG00000130816	0.614706	4.37621e-52	2.27158e-50	DNMT1	up	49.6437
ENSG00000006530	0.877015	4.51272e-52	2.33413e-50	AGK	up	49.6319
ENSG00000093009	0.971119	4.53321e-52	2.33644e-50	CDC45	up	49.6314
ENSG00000108828	-0.829927	4.92109e-52	2.52743e-50	VAT1	down	49.5973
ENSG00000187068	-0.945858	5.30205e-52	2.71353e-50	C3orf70	down	49.5665
ENSG00000025770	0.702817	6.70513e-52	3.41962e-50	NCAPH2	up	49.466
ENSG00000112902	-1.38224	6.83673e-52	3.47458e-50	SEMA5A	down	49.4591
ENSG00000176890	0.881711	6.929e-52	3.50925e-50	TYMS	up	49.4548
ENSG00000186868	-0.922066	1.19213e-51	6.01677e-50	MAPT	down	49.2206
ENSG00000100129	-0.60738	2.37449e-51	1.19429e-49	EIF3L	down	48.9229
ENSG00000176105	0.70402	2.96148e-51	1.48441e-49	YES1	up	48.8284
ENSG00000166986	0.570476	5.06023e-51	2.52769e-49	MARS	stable	48.5973
ENSG00000124006	-0.669634	5.96209e-51	2.96802e-49	OBSL1	down	48.5275
ENSG00000228716	0.830947	6.16026e-51	3.05624e-49	DHFR	up	48.5148
ENSG00000065150	0.595299	1.52214e-50	7.52608e-49	IPO5	up	48.1234
ENSG00000129103	-0.625717	3.68689e-50	1.81679e-48	SUMF2	down	47.7407
ENSG00000110880	0.588872	4.16218e-50	2.04409e-48	CORO1C	up	47.6895
ENSG00000053372	0.828953	5.79465e-50	2.83627e-48	MRTO4	up	47.5473
ENSG00000134222	-0.731263	6.07898e-50	2.96549e-48	PSRC1	down	47.5279
ENSG00000107338	1.2723	8.05097e-50	3.91438e-48	SHB	up	47.4073
ENSG00000138771	0.974557	8.33421e-50	4.03863e-48	SHROOM3	up	47.3938
ENSG00000126351	-0.972468	1.00822e-49	4.86951e-48	THRA	down	47.3125
ENSG00000132975	-1.88924	1.2871e-49	6.19594e-48	GPR12	down	47.2079
ENSG00000134871	0.707913	1.48271e-49	7.11406e-48	COL4A2	up	47.1479
ENSG00000100714	0.609925	1.65738e-49	7.9261e-48	MTHFD1	up	47.1009
ENSG00000130204	0.667898	2.75325e-49	1.31238e-47	TOMM40	up	46.8819
ENSG00000122779	-0.580244	4.36232e-49	2.0726e-47	TRIM24	stable	46.6835
ENSG00000135245	-1.22749	4.75535e-49	2.252e-47	HILPDA	down	46.6474
ENSG00000057657	2.33789	5.85666e-49	2.76457e-47	PRDM1	up	46.5584
ENSG00000104907	0.772643	6.70124e-49	3.15304e-47	TRMT1	up	46.5013
ENSG00000125148	-1.05638	7.74275e-49	3.63137e-47	MT2A	down	46.4399
ENSG00000149136	0.581603	8.19334e-49	3.83039e-47	SSRP1	stable	46.4168
ENSG00000182985	0.871671	1.25371e-48	5.84239e-47	CADM1	up	46.2334
ENSG00000071539	1.08731	1.51751e-48	7.04915e-47	TRIP13	up	46.1519
ENSG00000105856	-1.42231	1.63866e-48	7.58777e-47	HBP1	down	46.1199
ENSG00000147536	0.847733	1.74548e-48	8.05684e-47	GINS4	up	46.0938
ENSG00000170558	0.511066	1.86497e-48	8.58123e-47	CDH2	stable	46.0665
ENSG00000091136	0.573195	2.61687e-48	1.20031e-46	LAMB1	stable	45.9207
ENSG00000138760	-0.607753	1.18057e-47	5.39805e-46	SCARB2	down	45.2678
ENSG00000123416	0.57876	1.52721e-47	6.96122e-46	TUBA1B	stable	45.1573
ENSG00000169710	0.701984	1.60901e-47	7.31121e-46	FASN	up	45.136
ENSG00000177606	0.492041	1.68989e-47	7.65488e-46	JUN	stable	45.1161
ENSG00000185432	-1.51196	1.84559e-47	8.33429e-46	METTL7A	down	45.0791
ENSG00000176619	0.59893	1.89652e-47	8.53787e-46	LMNB2	up	45.0687
ENSG00000187741	0.957216	2.08641e-47	9.36383e-46	FANCA	up	45.0285
ENSG00000129757	-1.97641	2.43844e-47	1.09101e-45	CDKN1C	down	44.9622
ENSG00000157601	-1.88552	2.47312e-47	1.10315e-45	MX1	down	44.9574
ENSG00000165732	0.592868	3.30641e-47	1.47034e-45	DDX21	up	44.8326
ENSG00000115241	0.599967	3.37594e-47	1.4967e-45	PPM1G	up	44.8249
ENSG00000186185	0.870527	4.45205e-47	1.96781e-45	KIF18B	up	44.706
ENSG00000152661	0.661373	7.26574e-47	3.20175e-45	GJA1	up	44.4946
ENSG00000033867	0.845984	7.56633e-47	3.32417e-45	SLC4A7	up	44.4783
ENSG00000178921	0.820845	8.75056e-47	3.8329e-45	PFAS	up	44.4165
ENSG00000110619	0.62715	1.03137e-46	4.50408e-45	CARS	up	44.3464
ENSG00000197746	-0.498674	1.60282e-46	6.97873e-45	PSAP	stable	44.1562
ENSG00000103740	-1.66928	1.62233e-46	7.04263e-45	ACSBG1	down	44.1523
ENSG00000198300	-0.852765	2.43565e-46	1.05419e-44	PEG3	down	43.9771
ENSG00000107249	1.14272	2.47917e-46	1.06986e-44	GLIS3	up	43.9707
ENSG00000107159	-3.60579	2.71992e-46	1.17029e-44	CA9	down	43.9317
ENSG00000171552	0.819252	2.78701e-46	1.19563e-44	BCL2L1	up	43.9224
ENSG00000074054	0.775579	3.31606e-46	1.41842e-44	CLASP1	up	43.8482
ENSG00000135924	-0.749311	3.43195e-46	1.4637e-44	DNAJB2	down	43.8345
ENSG00000110660	0.942405	3.59373e-46	1.52823e-44	SLC35F2	up	43.8158
ENSG00000173404	0.614616	5.48201e-46	2.32444e-44	INSM1	up	43.6337
ENSG00000188229	0.529778	6.87104e-46	2.90496e-44	TUBB4B	stable	43.5369
ENSG00000167671	-0.655046	9.17822e-46	3.86918e-44	UBXN6	down	43.4124
ENSG00000278259	0.844287	1.11474e-45	4.68575e-44	MYO19	up	43.3292
ENSG00000138668	0.627357	1.36424e-45	5.71805e-44	HNRNPD	up	43.2428
ENSG00000124225	1.15245	1.38487e-45	5.7879e-44	PMEPA1	up	43.2375
ENSG00000176171	-0.838566	2.26957e-45	9.45828e-44	BNIP3	down	43.0242
ENSG00000012822	-1.03658	3.31887e-45	1.37917e-43	CALCOCO1	down	42.8604
ENSG00000106066	-0.76534	3.42682e-45	1.41999e-43	CPVL	down	42.8477
ENSG00000080573	4.36946	5.86659e-45	2.42408e-43	COL5A3	up	42.6155
ENSG00000120437	0.643421	1.0474e-44	4.31564e-43	ACAT2	up	42.365
ENSG00000149177	-0.682695	1.06491e-44	4.37541e-43	PTPRJ	down	42.359
ENSG00000164163	0.717877	1.10043e-44	4.50869e-43	ABCE1	up	42.3459
ENSG00000116209	-0.742211	1.18756e-44	4.85204e-43	TMEM59	down	42.3141
ENSG00000106415	-0.84724	1.71144e-44	6.97294e-43	GLCCI1	down	42.1566
ENSG00000092621	0.54986	1.85909e-44	7.55339e-43	PHGDH	stable	42.1219
ENSG00000196843	-0.94847	2.51517e-44	1.01906e-42	ARID5A	down	41.9918
ENSG00000087250	-1.845	2.76371e-44	1.11666e-42	MT3	down	41.9521
ENSG00000134324	0.723796	3.86721e-44	1.55821e-42	LPIN1	up	41.8074
ENSG00000099901	0.707113	3.90015e-44	1.56715e-42	RANBP1	up	41.8049
ENSG00000143878	0.562799	5.51636e-44	2.21048e-42	RHOB	stable	41.6555
ENSG00000112759	0.778208	6.32463e-44	2.52743e-42	SLC29A1	up	41.5973
ENSG00000090013	-1.23607	7.49775e-44	2.98804e-42	BLVRB	down	41.5246
ENSG00000107798	-0.645274	8.4123e-44	3.34338e-42	LIPA	down	41.4758
ENSG00000118369	-1.017	1.06008e-43	4.20171e-42	USP35	down	41.3766
ENSG00000156508	-0.530384	1.98166e-43	7.83319e-42	EEF1A1	stable	41.1061
ENSG00000114200	-1.10585	2.05781e-43	8.11223e-42	BCHE	down	41.0909
ENSG00000135506	-0.423398	3.09182e-43	1.21556e-41	OS9	stable	40.9152
ENSG00000120093	0.662425	3.13058e-43	1.22749e-41	HOXB3	up	40.911
ENSG00000166025	0.758212	3.14888e-43	1.23135e-41	AMOTL1	up	40.9096
ENSG00000119801	-1.30207	3.71158e-43	1.44752e-41	YPEL5	down	40.8394
ENSG00000129353	-0.604899	4.92711e-43	1.91645e-41	SLC44A2	down	40.7175
ENSG00000170515	0.741509	5.48776e-43	2.12884e-41	PA2G4	up	40.6719
ENSG00000102172	0.72253	5.89909e-43	2.28234e-41	SMS	up	40.6416
ENSG00000174938	-0.731024	6.25643e-43	2.41419e-41	SEZ6L2	down	40.6172
ENSG00000125462	-0.597389	1.37124e-42	5.27729e-41	C1orf61	down	40.2776
ENSG00000114796	-1.67104	1.7188e-42	6.59747e-41	KLHL24	down	40.1806
ENSG00000137310	0.878754	1.74858e-42	6.69415e-41	TCF19	up	40.1743
ENSG00000168496	0.717673	2.04507e-42	7.80875e-41	FEN1	up	40.1074
ENSG00000100316	-0.515976	2.70758e-42	1.03114e-40	RPL3	stable	39.9867
ENSG00000182199	0.520537	2.87519e-42	1.09212e-40	SHMT2	stable	39.9617
ENSG00000168209	-0.666513	2.93952e-42	1.11366e-40	DDIT4	down	39.9532
ENSG00000234745	-0.606385	3.47592e-42	1.31347e-40	HLA-B	down	39.8816
ENSG00000125124	-1.04076	3.83659e-42	1.44601e-40	BBS2	down	39.8398
ENSG00000104738	0.62528	4.42408e-42	1.66313e-40	MCM4	up	39.7791
ENSG00000221869	-1.21413	5.30298e-42	1.98841e-40	CEBPD	down	39.7015
ENSG00000160193	1.01803	6.48792e-42	2.42648e-40	WDR4	up	39.615
ENSG00000069399	-0.919109	6.7692e-42	2.52521e-40	BCL3	down	39.5977
ENSG00000075702	0.833726	7.72518e-42	2.87448e-40	WDR62	up	39.5414
ENSG00000080608	0.787244	1.09293e-41	4.05636e-40	PUM3	up	39.3919
ENSG00000071991	-1.26594	1.17283e-41	4.34185e-40	CDH19	down	39.3623
ENSG00000242732	-0.869495	1.27747e-41	4.71726e-40	RTL5	down	39.3263
ENSG00000212907	0.651211	1.52132e-41	5.60352e-40	MT-ND4L	up	39.2515
ENSG00000180354	-0.93326	2.19139e-41	8.0513e-40	MTURN	down	39.0941
ENSG00000198176	0.662252	2.2624e-41	8.29129e-40	TFDP1	up	39.0814
ENSG00000137962	1.47534	2.42265e-41	8.85633e-40	ARHGAP29	up	39.0527
ENSG00000118689	-0.806456	2.60011e-41	9.48128e-40	FOXO3	down	39.0231
ENSG00000173638	0.745237	2.89996e-41	1.05483e-39	SLC19A1	up	38.9768
ENSG00000198786	0.554665	3.36429e-41	1.22068e-39	MT-ND5	stable	38.9134
ENSG00000131467	0.554709	3.7921e-41	1.3725e-39	PSME3	stable	38.8625
ENSG00000182325	0.776978	4.25992e-41	1.538e-39	FBXL6	up	38.813
ENSG00000137309	0.510198	4.54707e-41	1.63762e-39	HMGA1	stable	38.7858
ENSG00000132382	0.76829	4.60646e-41	1.65492e-39	MYBBP1A	up	38.7812
ENSG00000176624	0.715435	5.17224e-41	1.85362e-39	MEX3C	up	38.732
ENSG00000136504	-0.653997	5.80229e-41	2.07432e-39	KAT7	down	38.6831
ENSG00000126785	-0.730666	5.92971e-41	2.11469e-39	RHOJ	down	38.6748
ENSG00000156687	-1.15101	5.98145e-41	2.12794e-39	UNC5D	down	38.672
ENSG00000009413	-0.748979	7.61194e-41	2.70141e-39	REV3L	down	38.5684
ENSG00000221968	0.909215	7.69594e-41	2.72459e-39	FADS3	up	38.5647
ENSG00000175155	-2.6535	1.06343e-40	3.75575e-39	YPEL2	down	38.4253
ENSG00000172201	-0.532778	1.31821e-40	4.63311e-39	ID4	stable	38.3341
ENSG00000092853	0.963371	1.31635e-40	4.63311e-39	CLSPN	up	38.3341
ENSG00000087087	0.534614	1.67004e-40	5.85557e-39	SRRT	stable	38.2324
ENSG00000184216	0.622397	2.62461e-40	9.18048e-39	IRAK1	up	38.0371
ENSG00000182272	-0.603976	2.64214e-40	9.21969e-39	B4GALNT4	down	38.0353
ENSG00000113140	-0.441577	2.70411e-40	9.41341e-39	SPARC	stable	38.0263
ENSG00000136156	-0.613587	2.89231e-40	1.00446e-38	ITM2B	down	37.9981
ENSG00000144381	0.592197	2.94467e-40	1.02021e-38	HSPD1	up	37.9913
ENSG00000186998	-1.49986	3.29378e-40	1.13846e-38	EMID1	down	37.9437
ENSG00000106462	0.72287	3.31303e-40	1.14241e-38	EZH2	up	37.9422
ENSG00000134954	0.848339	4.29833e-40	1.47867e-38	ETS1	up	37.8301
ENSG00000114867	0.52971	5.3142e-40	1.82383e-38	EIF4G1	stable	37.739
ENSG00000174371	0.990683	8.74497e-40	2.99423e-38	EXO1	up	37.5237
ENSG00000198431	0.598993	1.34216e-39	4.58472e-38	TXNRD1	up	37.3387
ENSG00000074410	-0.523496	1.54534e-39	5.26645e-38	CA12	stable	37.2785
ENSG00000159788	0.823633	1.67827e-39	5.70611e-38	RGS12	up	37.2437
ENSG00000188549	1.08524	1.91313e-39	6.48952e-38	CCDC9B	up	37.1878
ENSG00000142173	-0.633858	2.06267e-39	6.98054e-38	COL6A2	down	37.1561
ENSG00000106263	0.469156	2.20499e-39	7.44491e-38	EIF3B	stable	37.1281
ENSG00000185033	-0.979031	2.47387e-39	8.33347e-38	SEMA4B	down	37.0792
ENSG00000178999	0.839164	2.8266e-39	9.49971e-38	AURKB	up	37.0223
ENSG00000007237	-0.646595	3.49452e-39	1.17175e-37	GAS7	down	36.9312
ENSG00000110321	0.445027	3.87636e-39	1.2968e-37	EIF4G2	stable	36.8871
ENSG00000085415	0.731991	4.98427e-39	1.66363e-37	SEH1L	up	36.7789
ENSG00000069849	0.648638	5.48958e-39	1.8281e-37	ATP1B3	up	36.738
ENSG00000142534	-0.522598	8.09795e-39	2.69059e-37	RPS11	stable	36.5702
ENSG00000120800	0.85743	9.07117e-39	3.00709e-37	UTP20	up	36.5219
ENSG00000013619	0.894481	9.94266e-39	3.28852e-37	MAMLD1	up	36.483
ENSG00000118816	-0.551351	1.09174e-38	3.60273e-37	CCNI	stable	36.4434
ENSG00000105701	-0.559599	1.14069e-38	3.75579e-37	FKBP8	stable	36.4253
ENSG00000160214	0.752968	1.47001e-38	4.82918e-37	RRP1	up	36.3161
ENSG00000147883	0.534667	1.78581e-38	5.85346e-37	CDKN2B	stable	36.2326
ENSG00000184221	-0.74591	2.65692e-38	8.6892e-37	OLIG1	down	36.061
ENSG00000110104	0.900195	3.93943e-38	1.28547e-36	CCDC86	up	35.8909
ENSG00000167767	4.21296	5.61139e-38	1.82696e-36	KRT80	up	35.7383
ENSG00000037474	0.690948	6.40808e-38	2.0817e-36	NSUN2	up	35.6816
ENSG00000099194	0.465706	6.81089e-38	2.20764e-36	SCD	stable	35.6561
ENSG00000121671	-0.943627	6.93971e-38	2.2444e-36	CRY2	down	35.6489
ENSG00000123136	0.601453	9.33657e-38	3.0129e-36	DDX39A	up	35.521
ENSG00000125912	0.510218	9.52271e-38	3.06619e-36	NCLN	stable	35.5134
ENSG00000125266	0.878501	9.9771e-38	3.20542e-36	EFNB2	up	35.4941
ENSG00000116120	0.768946	1.08356e-37	3.47357e-36	FARSB	up	35.4592
ENSG00000165304	0.684525	1.22562e-37	3.92036e-36	MELK	up	35.4067
ENSG00000188486	0.479769	1.44336e-37	4.60676e-36	H2AFX	stable	35.3366
ENSG00000100664	0.551036	1.49281e-37	4.75419e-36	EIF5	stable	35.3229
ENSG00000214706	0.666804	1.7097e-37	5.43306e-36	IFRD2	up	35.265
ENSG00000179431	0.565538	2.45483e-37	7.78394e-36	FJX1	stable	35.1088
ENSG00000165072	0.831176	2.52189e-37	7.97922e-36	MAMDC2	up	35.098
ENSG00000176428	-1.41469	3.11268e-37	9.82718e-36	VPS37D	down	35.0076
ENSG00000124789	0.659029	3.20548e-37	1.00983e-35	NUP153	up	34.9958
ENSG00000111897	-0.608909	3.44579e-37	1.0832e-35	SERINC1	down	34.9653
ENSG00000198899	0.514557	3.81088e-37	1.19539e-35	MT-ATP6	stable	34.9225
ENSG00000078269	0.965764	4.58617e-37	1.43549e-35	SYNJ2	up	34.843
ENSG00000181026	0.717142	5.29672e-37	1.65435e-35	AEN	up	34.7814
ENSG00000128567	0.566739	6.29065e-37	1.96059e-35	PODXL	stable	34.7076
ENSG00000205978	-1.17981	7.11596e-37	2.21308e-35	NYNRIN	down	34.655
ENSG00000133818	0.975094	9.21622e-37	2.86017e-35	RRAS2	up	34.5436
ENSG00000143333	0.773582	9.43124e-37	2.92068e-35	RGS16	up	34.5345
ENSG00000206503	-0.530509	9.84102e-37	3.04113e-35	HLA-A	stable	34.517
ENSG00000163050	-1.0524	1.14133e-36	3.51954e-35	COQ8A	down	34.4535
ENSG00000161547	0.644792	1.43895e-36	4.42797e-35	SRSF2	up	34.3538
ENSG00000177084	0.74493	1.58257e-36	4.85967e-35	POLE	up	34.3134
ENSG00000112139	1.10493	1.76931e-36	5.42167e-35	MDGA1	up	34.2659
ENSG00000007171	0.575607	2.687e-36	8.21649e-35	NOS2	stable	34.0853
ENSG00000071462	0.604127	3.07767e-36	9.3914e-35	BUD23	up	34.0273
ENSG00000250305	-0.636446	3.11394e-36	9.48225e-35	TRMT9B	down	34.0231
ENSG00000140416	0.870549	3.63926e-36	1.10588e-34	TPM1	up	33.9563
ENSG00000169129	-1.27208	3.71687e-36	1.12712e-34	AFAP1L2	down	33.948
ENSG00000143549	0.497976	3.85397e-36	1.16626e-34	TPM3	stable	33.9332
ENSG00000144040	0.762308	4.75368e-36	1.43555e-34	SFXN5	up	33.843
ENSG00000121579	0.666427	5.09768e-36	1.53626e-34	NAA50	up	33.8135
ENSG00000101224	-0.491585	6.34386e-36	1.90787e-34	CDC25B	stable	33.7195
ENSG00000164976	-0.853438	6.37625e-36	1.91366e-34	MYORG	down	33.7181
ENSG00000137501	1.65187	6.71111e-36	2.01002e-34	SYTL2	up	33.6968
ENSG00000111276	-0.595	6.80086e-36	2.03273e-34	CDKN1B	down	33.6919
ENSG00000185298	0.73362	8.13306e-36	2.42595e-34	CCDC137	up	33.6151
ENSG00000146072	-0.787965	8.89342e-36	2.64734e-34	TNFRSF21	down	33.5772
ENSG00000143786	0.71866	9.60613e-36	2.85367e-34	CNIH3	up	33.5446
ENSG00000119655	-1.21615	1.0489e-35	3.10962e-34	NPC2	down	33.5073
ENSG00000108561	0.540944	1.10608e-35	3.27246e-34	C1QBP	stable	33.4851
ENSG00000167513	0.684382	1.21056e-35	3.57432e-34	CDT1	up	33.4468
ENSG00000105376	-0.795482	1.92886e-35	5.68371e-34	ICAM5	down	33.2454
ENSG00000076864	-1.54591	2.27884e-35	6.70144e-34	RAP1GAP	down	33.1738
ENSG00000135363	-1.58673	2.63401e-35	7.73032e-34	LMO2	down	33.1118
ENSG00000128283	0.800186	2.84834e-35	8.34256e-34	CDC42EP1	up	33.0787
ENSG00000164741	0.752059	3.13732e-35	9.17054e-34	DLC1	up	33.0376
ENSG00000136099	-1.88569	3.42836e-35	1.00012e-33	PCDH8	down	32.9999
ENSG00000179222	-0.501001	4.2889e-35	1.24866e-33	MAGED1	stable	32.9036
ENSG00000104980	0.561358	6.27538e-35	1.81974e-33	TIMM44	stable	32.74
ENSG00000090661	-0.708688	6.26959e-35	1.81974e-33	CERS4	down	32.74
ENSG00000138135	1.61764	8.55322e-35	2.47534e-33	CH25H	up	32.6064
ENSG00000111252	0.787308	1.22207e-34	3.52973e-33	SH2B3	up	32.4523
ENSG00000105447	0.623419	1.49859e-34	4.31986e-33	GRWD1	up	32.3645
ENSG00000228300	0.652717	1.51212e-34	4.35025e-33	C19orf24	up	32.3615
ENSG00000170779	0.706434	1.59943e-34	4.59238e-33	CDCA4	up	32.338
ENSG00000116133	0.495057	1.96558e-34	5.63259e-33	DHCR24	stable	32.2493
ENSG00000138166	0.623641	2.06638e-34	5.90984e-33	DUSP5	up	32.2284
ENSG00000105516	-1.75458	2.16699e-34	6.18546e-33	DBP	down	32.2086
ENSG00000108947	-0.947528	2.31668e-34	6.59984e-33	EFNB3	down	32.1805
ENSG00000177595	0.690759	2.71173e-34	7.71018e-33	PIDD1	up	32.1129
ENSG00000108424	0.429671	2.80677e-34	7.96488e-33	KPNB1	stable	32.0988
ENSG00000142541	-0.558151	3.21069e-34	9.09342e-33	RPL13A	stable	32.0413
ENSG00000106077	0.838612	3.22662e-34	9.12083e-33	ABHD11	up	32.04
ENSG00000177192	0.961081	3.37757e-34	9.52907e-33	PUS1	up	32.0209
ENSG00000130726	0.416088	4.63301e-34	1.30458e-32	TRIM28	stable	31.8845
ENSG00000113013	0.497577	5.36978e-34	1.50913e-32	HSPA9	stable	31.8213
ENSG00000065328	0.766979	6.40969e-34	1.79792e-32	MCM10	up	31.7452
ENSG00000101003	0.700001	6.44802e-34	1.8052e-32	GINS1	up	31.7435
ENSG00000102038	-0.606299	7.04453e-34	1.96842e-32	SMARCA1	down	31.7059
ENSG00000171320	0.746165	8.2292e-34	2.29505e-32	ESCO2	up	31.6392
ENSG00000128050	0.485815	9.74149e-34	2.71163e-32	PAICS	stable	31.5668
ENSG00000149428	0.448853	1.92288e-33	5.3423e-32	HYOU1	stable	31.2723
ENSG00000089280	0.465237	1.94675e-33	5.39833e-32	FUS	stable	31.2677
ENSG00000099785	-0.897906	1.985e-33	5.49397e-32	2024-03-02	down	31.2601
ENSG00000148604	-2.00347	2.11815e-33	5.85139e-32	RGR	down	31.2327
ENSG00000112159	0.878736	2.13449e-33	5.88539e-32	MDN1	up	31.2302
ENSG00000137198	-0.861214	2.21346e-33	6.09162e-32	GMPR	down	31.2153
ENSG00000144560	-0.812128	2.38824e-33	6.56024e-32	VGLL4	down	31.1831
ENSG00000131470	1.06893	2.45261e-33	6.7244e-32	PSMC3IP	up	31.1723
ENSG00000165689	0.633669	2.71161e-33	7.42054e-32	ENTR1	up	31.1296
ENSG00000177807	-1.60165	2.86091e-33	7.81446e-32	KCNJ10	down	31.1071
ENSG00000130304	-0.710636	2.9063e-33	7.92359e-32	SLC27A1	down	31.1011
ENSG00000115267	-1.14374	3.53755e-33	9.62662e-32	IFIH1	down	31.0165
ENSG00000066117	0.538639	3.79314e-33	1.03029e-31	SMARCD1	stable	30.987
ENSG00000130766	0.80617	4.0657e-33	1.10227e-31	SESN2	up	30.9577
ENSG00000167508	0.574063	4.26652e-33	1.15457e-31	MVD	stable	30.9376
ENSG00000125945	-0.587546	4.4147e-33	1.19246e-31	ZNF436	down	30.9236
ENSG00000182718	0.508731	4.95755e-33	1.33661e-31	ANXA2	stable	30.874
ENSG00000180198	0.59747	5.01862e-33	1.35058e-31	RCC1	up	30.8695
ENSG00000205413	-1.36853	5.47009e-33	1.46937e-31	SAMD9	down	30.8329
ENSG00000185324	0.744653	6.10546e-33	1.63703e-31	CDK10	up	30.7859
ENSG00000130164	0.578288	6.16291e-33	1.6494e-31	LDLR	stable	30.7827
ENSG00000115414	-0.715204	7.99713e-33	2.13638e-31	FN1	down	30.6703
ENSG00000065911	0.506705	8.02019e-33	2.13862e-31	MTHFD2	stable	30.6699
ENSG00000092201	0.448576	1.14326e-32	3.04165e-31	SUPT16H	stable	30.5169
ENSG00000131171	-0.888364	1.14484e-32	3.04165e-31	SH3BGRL	down	30.5169
ENSG00000100941	0.527622	1.33902e-32	3.55107e-31	PNN	stable	30.4496
ENSG00000255690	-0.679804	1.5555e-32	4.11471e-31	TRIL	down	30.3857
ENSG00000171533	-0.762846	1.55719e-32	4.11471e-31	MAP6	down	30.3857
ENSG00000176014	0.59596	1.80441e-32	4.75934e-31	TUBB6	up	30.3225
ENSG00000198604	0.627313	1.91317e-32	5.0371e-31	BAZ1A	up	30.2978
ENSG00000150990	0.730099	2.31335e-32	6.07973e-31	DHX37	up	30.2161
ENSG00000071626	0.491147	2.38643e-32	6.2605e-31	DAZAP1	stable	30.2034
ENSG00000105011	0.571989	2.48262e-32	6.50117e-31	ASF1B	stable	30.187
ENSG00000278540	0.595321	2.64937e-32	6.9254e-31	ACACA	up	30.1596
ENSG00000121104	-0.969318	2.91311e-32	7.60119e-31	FAM117A	down	30.1191
ENSG00000141540	-0.968884	3.69787e-32	9.63164e-31	TTYH2	down	30.0163
ENSG00000165891	0.724751	3.87036e-32	1.00629e-30	E2F7	up	29.9973
ENSG00000132561	-0.983653	4.19457e-32	1.08865e-30	MATN2	down	29.9631
ENSG00000175390	-0.561022	4.74819e-32	1.23014e-30	EIF3F	stable	29.91
ENSG00000123374	0.590875	4.87552e-32	1.26089e-30	CDK2	up	29.8993
ENSG00000139514	0.712967	4.98223e-32	1.28621e-30	SLC7A1	up	29.8907
ENSG00000137628	-1.32778	5.12663e-32	1.32115e-30	DDX60	down	29.879
ENSG00000092096	-0.562549	5.41671e-32	1.39344e-30	SLC22A17	stable	29.8559
ENSG00000185565	-0.955842	5.6266e-32	1.44489e-30	LSAMP	down	29.8402
ENSG00000170873	-0.697555	5.81748e-32	1.49128e-30	MTSS1	down	29.8264
ENSG00000135535	-0.537791	5.96754e-32	1.52706e-30	CD164	stable	29.8161
ENSG00000150753	0.531972	7.5503e-32	1.9287e-30	CCT5	stable	29.7147
ENSG00000188566	0.802103	8.06203e-32	2.05582e-30	NDOR1	up	29.687
ENSG00000139734	1.03946	8.19868e-32	2.08701e-30	DIAPH3	up	29.6805
ENSG00000106052	-0.520274	8.80717e-32	2.238e-30	TAX1BP1	stable	29.6501
ENSG00000089199	-0.713563	1.02706e-31	2.60533e-30	CHGB	down	29.5841
ENSG00000100433	-0.961229	1.0479e-31	2.65359e-30	KCNK10	down	29.5762
ENSG00000168056	-0.546265	1.05388e-31	2.66411e-30	LTBP3	stable	29.5744
ENSG00000181444	-2.32329	1.17451e-31	2.96392e-30	ZNF467	down	29.5281
ENSG00000168159	-0.47953	1.22645e-31	3.08965e-30	RNF187	stable	29.5101
ENSG00000115902	0.694067	1.38152e-31	3.47428e-30	SLC1A4	up	29.4591
ENSG00000119950	-1.08811	1.49055e-31	3.74202e-30	MXI1	down	29.4269
ENSG00000110108	0.697132	1.55201e-31	3.88964e-30	TMEM109	up	29.4101
ENSG00000132780	0.531407	1.80944e-31	4.52702e-30	NASP	stable	29.3442
ENSG00000139289	0.409348	2.06429e-31	5.15576e-30	PHLDA1	stable	29.2877
ENSG00000124772	-1.18523	2.24341e-31	5.59358e-30	CPNE5	down	29.2523
ENSG00000136731	0.638325	2.65388e-31	6.60572e-30	UGGT1	up	29.1801
ENSG00000197977	-0.574256	2.77443e-31	6.89402e-30	ELOVL2	stable	29.1615
ENSG00000052749	0.734836	2.91165e-31	7.22267e-30	RRP12	up	29.1413
ENSG00000100036	0.988078	3.02379e-31	7.48812e-30	SLC35E4	up	29.1256
ENSG00000108518	0.508705	3.19234e-31	7.89212e-30	PFN1	stable	29.1028
ENSG00000100065	1.81256	3.43248e-31	8.47144e-30	CARD10	up	29.072
ENSG00000137103	-1.12959	4.92137e-31	1.21255e-29	TMEM8B	down	28.9163
ENSG00000175602	0.572238	4.99785e-31	1.22932e-29	CCDC85B	stable	28.9103
ENSG00000171617	0.379725	5.04341e-31	1.23844e-29	ENC1	stable	28.9071
ENSG00000109846	-1.3226	5.36498e-31	1.31519e-29	CRYAB	down	28.881
ENSG00000136271	0.475618	5.52971e-31	1.35329e-29	DDX56	stable	28.8686
ENSG00000170540	-0.525662	5.7662e-31	1.40881e-29	ARL6IP1	stable	28.8511
ENSG00000167470	0.487815	6.38636e-31	1.55772e-29	MIDN	stable	28.8075
ENSG00000144057	-1.1067	7.46161e-31	1.81695e-29	ST6GAL2	down	28.7407
ENSG00000146918	0.642315	7.51658e-31	1.82728e-29	NCAPG2	up	28.7382
ENSG00000152154	0.617824	7.56717e-31	1.83652e-29	TMEM178A	up	28.736
ENSG00000129250	0.578662	7.84661e-31	1.90117e-29	KIF1C	stable	28.721
ENSG00000138160	0.59829	9.21977e-31	2.23018e-29	KIF11	up	28.6517
ENSG00000101773	0.640546	1.02715e-30	2.48046e-29	RBBP8	up	28.6055
ENSG00000179403	-0.61521	1.11912e-30	2.6981e-29	VWA1	down	28.5689
ENSG00000152104	0.733123	1.12473e-30	2.70715e-29	PTPN14	up	28.5675
ENSG00000167721	0.57587	1.4188e-30	3.40932e-29	TSR1	stable	28.4673
ENSG00000108671	0.536508	1.55763e-30	3.73677e-29	PSMD11	stable	28.4275
ENSG00000154127	0.532409	1.66594e-30	3.99004e-29	UBASH3B	stable	28.399
ENSG00000162607	0.54806	1.94253e-30	4.64489e-29	USP1	stable	28.333
ENSG00000119326	0.744994	2.16e-30	5.15643e-29	CTNNAL1	up	28.2877
ENSG00000122642	-0.432282	2.20018e-30	5.24377e-29	FKBP9	stable	28.2804
ENSG00000124762	0.488311	2.73846e-30	6.51602e-29	CDKN1A	stable	28.186
ENSG00000133639	-0.812374	2.95628e-30	7.02284e-29	BTG1	down	28.1535
ENSG00000196338	-1.02926	3.17393e-30	7.52764e-29	NLGN3	down	28.1233
ENSG00000198931	0.620272	3.2364e-30	7.66332e-29	APRT	up	28.1156
ENSG00000284976	0.822569	3.37884e-30	7.98763e-29	BX255925.3	up	28.0976
ENSG00000111674	-0.450677	3.42195e-30	8.07647e-29	ENO2	stable	28.0928
ENSG00000116990	-1.43349	3.47778e-30	8.19498e-29	MYCL	down	28.0865
ENSG00000164877	0.803986	3.57974e-30	8.42163e-29	MICALL2	up	28.0746
ENSG00000124766	-0.604339	3.75656e-30	8.82339e-29	SOX4	down	28.0544
ENSG00000090273	0.564255	4.37043e-30	1.02487e-28	NUDC	stable	27.9893
ENSG00000136295	0.530304	4.4482e-30	1.04144e-28	TTYH3	stable	27.9824
ENSG00000107554	0.72357	4.94904e-30	1.15684e-28	DNMBP	up	27.9367
ENSG00000077044	0.75946	5.00567e-30	1.1682e-28	DGKD	up	27.9325
ENSG00000116985	-1.09166	5.33959e-30	1.24414e-28	BMP8B	down	27.9051
ENSG00000108055	0.58389	5.6752e-30	1.32023e-28	SMC3	stable	27.8794
ENSG00000130529	-1.0747	6.10057e-30	1.41693e-28	TRPM4	down	27.8487
ENSG00000156587	-0.774721	7.37432e-30	1.71004e-28	UBE2L6	down	27.767
ENSG00000162062	0.778677	8.44331e-30	1.95483e-28	TEDC2	up	27.7089
ENSG00000111206	0.625179	8.86731e-30	2.04974e-28	FOXM1	up	27.6883
ENSG00000183283	-0.500407	8.99893e-30	2.07687e-28	DAZAP2	stable	27.6826
ENSG00000198355	-0.584263	9.32412e-30	2.14852e-28	PIM3	stable	27.6679
ENSG00000077514	0.740697	1.01851e-29	2.34321e-28	POLD3	up	27.6302
ENSG00000156453	-1.12232	1.10104e-29	2.52909e-28	PCDH1	down	27.597
ENSG00000123427	-0.468303	1.14962e-29	2.63653e-28	EEF1AKMT3	stable	27.579
ENSG00000213339	0.614059	1.3598e-29	3.11365e-28	QTRT1	up	27.5067
ENSG00000160208	0.593823	1.42113e-29	3.24901e-28	RRP1B	up	27.4882
ENSG00000127603	0.621882	1.48827e-29	3.39718e-28	MACF1	up	27.4689
ENSG00000185507	-0.763616	1.52766e-29	3.48163e-28	IRF7	down	27.4582
ENSG00000105605	-0.530443	1.57857e-29	3.59206e-28	CACNG7	stable	27.4447
ENSG00000164543	0.476628	1.88141e-29	4.2745e-28	STK17A	stable	27.3691
ENSG00000183762	-0.813754	1.89015e-29	4.28767e-28	KREMEN1	down	27.3678
ENSG00000169689	0.663735	1.94279e-29	4.40023e-28	CENPX	up	27.3565
ENSG00000143061	-0.624732	2.17951e-29	4.92873e-28	IGSF3	down	27.3073
ENSG00000182580	-0.952097	2.55775e-29	5.77514e-28	EPHB3	down	27.2384
ENSG00000115266	-0.772848	2.5973e-29	5.85536e-28	APC2	down	27.2324
ENSG00000184792	0.781742	2.87024e-29	6.46071e-28	OSBP2	up	27.1897
ENSG00000178104	-0.627034	3.00755e-29	6.75933e-28	PDE4DIP	down	27.1701
ENSG00000125652	-0.639006	3.06965e-29	6.8883e-28	ALKBH7	down	27.1619
ENSG00000111696	1.07651	3.32453e-29	7.44879e-28	NT5DC3	up	27.1279
ENSG00000189306	0.494267	3.3467e-29	7.48696e-28	RRP7A	stable	27.1257
ENSG00000169504	0.417714	4.118e-29	9.19835e-28	CLIC4	stable	27.0363
ENSG00000198839	-0.92228	4.57724e-29	1.02085e-27	ZNF277	down	26.991
ENSG00000149823	-0.531866	5.32836e-29	1.18656e-27	VPS51	stable	26.9257
ENSG00000141753	-0.717707	5.45525e-29	1.21296e-27	IGFBP4	down	26.9162
ENSG00000183853	0.773994	6.12162e-29	1.35906e-27	KIRREL1	up	26.8668
ENSG00000205213	0.47263	6.9638e-29	1.54368e-27	LGR4	stable	26.8114
ENSG00000188157	-0.459598	7.06764e-29	1.56432e-27	AGRN	stable	26.8057
ENSG00000004478	0.494865	7.44375e-29	1.64507e-27	FKBP4	stable	26.7838
ENSG00000135446	0.384286	7.92478e-29	1.74873e-27	CDK4	stable	26.7573
ENSG00000070814	0.692936	9.27762e-29	2.04416e-27	TCOF1	up	26.6895
ENSG00000164638	-0.728239	1.00505e-28	2.21111e-27	SLC29A4	down	26.6554
ENSG00000166881	0.501493	1.36738e-28	3.00371e-27	NEMP1	stable	26.5223
ENSG00000198695	0.516654	1.50343e-28	3.2976e-27	MT-ND6	stable	26.4818
ENSG00000111653	-0.920759	1.61304e-28	3.53269e-27	ING4	down	26.4519
ENSG00000111269	-0.768904	1.71006e-28	3.73957e-27	CREBL2	down	26.4272
ENSG00000241839	-0.861252	1.85286e-28	4.04578e-27	PLEKHO2	down	26.393
ENSG00000111640	-0.35302	2.01106e-28	4.38466e-27	GAPDH	stable	26.3581
ENSG00000185885	-2.7853	2.15481e-28	4.69105e-27	IFITM1	down	26.3287
ENSG00000177409	-1.44555	2.17513e-28	4.72823e-27	SAMD9L	down	26.3253
ENSG00000138496	-0.882973	2.28041e-28	4.9497e-27	PARP9	down	26.3054
ENSG00000120802	0.495069	2.34003e-28	5.07156e-27	TMPO	stable	26.2949
ENSG00000125869	-1.10405	2.44371e-28	5.28842e-27	LAMP5	down	26.2767
ENSG00000143476	0.611222	2.8246e-28	6.10364e-27	DTL	up	26.2144
ENSG00000106144	0.599503	3.23031e-28	6.97002e-27	CASP2	up	26.1568
ENSG00000135069	0.462077	3.49987e-28	7.54049e-27	PSAT1	stable	26.1226
ENSG00000103260	-0.499642	3.72048e-28	8.00397e-27	METRN	stable	26.0967
ENSG00000103647	0.533327	3.9725e-28	8.53356e-27	CORO2B	stable	26.0689
ENSG00000153879	0.569656	4.18874e-28	8.98484e-27	CEBPG	stable	26.0465
ENSG00000100968	-0.873824	4.92772e-28	1.05544e-26	NFATC4	down	25.9766
ENSG00000126457	0.425163	5.08079e-28	1.08663e-26	PRMT1	stable	25.9639
ENSG00000165490	0.785664	5.09757e-28	1.08863e-26	DDIAS	up	25.9631
ENSG00000197903	-1.22561	5.7155e-28	1.21881e-26	HIST1H2BK	down	25.9141
ENSG00000103034	-0.894679	6.40658e-28	1.36418e-26	NDRG4	down	25.8651
ENSG00000170522	0.605929	7.48781e-28	1.59209e-26	ELOVL6	up	25.798
ENSG00000275700	0.64788	7.51028e-28	1.59454e-26	AATF	up	25.7974
ENSG00000075043	-0.480481	8.22723e-28	1.74422e-26	KCNQ2	stable	25.7584
ENSG00000126749	0.695836	9.51138e-28	2.01354e-26	EMG1	up	25.696
ENSG00000126368	-1.22477	9.85909e-28	2.08413e-26	NR1D1	down	25.6811
ENSG00000091527	0.507355	1.12154e-27	2.36741e-26	CDV3	stable	25.6257
ENSG00000167658	-0.39118	1.33623e-27	2.81651e-26	EEF2	stable	25.5503
ENSG00000135318	0.843371	1.36461e-27	2.87219e-26	NT5E	up	25.5418
ENSG00000132670	-0.459727	1.41302e-27	2.96978e-26	PTPRA	stable	25.5273
ENSG00000154380	0.456621	1.44425e-27	3.03105e-26	ENAH	stable	25.5184
ENSG00000130813	-1.08817	1.53539e-27	3.21771e-26	C19orf66	down	25.4925
ENSG00000101596	0.493261	1.60372e-27	3.35609e-26	SMCHD1	stable	25.4742
ENSG00000134684	0.443917	1.81162e-27	3.78571e-26	YARS	stable	25.4219
ENSG00000011304	0.410219	1.8585e-27	3.87813e-26	PTBP1	stable	25.4114
ENSG00000163938	0.562566	1.96646e-27	4.09754e-26	GNL3	stable	25.3875
ENSG00000134013	-0.59893	2.03931e-27	4.24328e-26	LOXL2	down	25.3723
ENSG00000105894	-0.458852	2.22703e-27	4.62727e-26	PTN	stable	25.3347
ENSG00000072310	0.525028	2.27443e-27	4.71903e-26	SREBF1	stable	25.3261
ENSG00000148840	0.706629	2.28352e-27	4.73117e-26	PPRC1	up	25.325
ENSG00000134321	-2.31245	2.50954e-27	5.19209e-26	RSAD2	down	25.2847
ENSG00000121152	0.569394	2.53524e-27	5.23783e-26	NCAPH	stable	25.2808
ENSG00000173540	0.761487	2.53902e-27	5.23821e-26	GMPPB	up	25.2808
ENSG00000105696	-2.34802	2.63401e-27	5.4265e-26	TMEM59L	down	25.2655
ENSG00000131462	0.544707	2.77784e-27	5.71474e-26	TUBG1	stable	25.243
ENSG00000129347	0.596368	2.90697e-27	5.97197e-26	KRI1	up	25.2239
ENSG00000197380	-0.968436	3.32668e-27	6.8246e-26	DACT3	down	25.1659
ENSG00000100162	0.878648	3.68224e-27	7.54342e-26	CENPM	up	25.1224
ENSG00000171241	0.721313	3.69779e-27	7.56466e-26	SHCBP1	up	25.1212
ENSG00000112118	0.472395	3.87958e-27	7.92543e-26	MCM3	stable	25.101
ENSG00000115944	-0.733039	3.92453e-27	8.00603e-26	COX7A2L	down	25.0966
ENSG00000144554	0.676221	4.35731e-27	8.8765e-26	FANCD2	up	25.0518
ENSG00000124126	-0.516325	4.42774e-27	9.00739e-26	PREX1	stable	25.0454
ENSG00000135835	-0.836252	4.43863e-27	9.01698e-26	KIAA1614	down	25.0449
ENSG00000105204	-1.2643	4.58155e-27	9.29437e-26	DYRK1B	down	25.0318
ENSG00000164440	-1.59016	4.756e-27	9.63486e-26	TXLNB	down	25.0162
ENSG00000177943	1.27895	4.8136e-27	9.73803e-26	MAMDC4	up	25.0115
ENSG00000166925	-0.565133	5.09094e-27	1.02706e-25	TSC22D4	stable	24.9884
ENSG00000163565	-0.58137	5.08467e-27	1.02706e-25	IFI16	stable	24.9884
ENSG00000142207	0.714873	5.41118e-27	1.09016e-25	URB1	up	24.9625
ENSG00000139112	-1.13195	5.73826e-27	1.15446e-25	GABARAPL1	down	24.9376
ENSG00000164171	0.806857	6.38287e-27	1.28238e-25	ITGA2	up	24.892
ENSG00000072501	0.525696	7.02552e-27	1.40955e-25	SMC1A	stable	24.8509
ENSG00000198948	1.18409	7.95433e-27	1.59371e-25	MFAP3L	up	24.7976
ENSG00000170345	-0.740523	9.87997e-27	1.97681e-25	FOS	down	24.704
ENSG00000184575	0.434568	1.02488e-26	2.04778e-25	XPOT	stable	24.6887
ENSG00000071127	0.442455	1.03962e-26	2.07441e-25	WDR1	stable	24.6831
ENSG00000172009	0.430423	1.04162e-26	2.07556e-25	THOP1	stable	24.6829
ENSG00000065308	0.63666	1.04878e-26	2.08697e-25	TRAM2	up	24.6805
ENSG00000111664	1.00819	1.22518e-26	2.43466e-25	GNB3	up	24.6136
ENSG00000105559	-0.545791	1.36722e-26	2.71323e-25	PLEKHA4	stable	24.5665
ENSG00000156504	0.751203	1.40733e-26	2.78903e-25	FAM122B	up	24.5545
ENSG00000005893	-0.48739	1.43473e-26	2.83949e-25	LAMP2	stable	24.5468
ENSG00000118960	-0.971511	1.46428e-26	2.89403e-25	HS1BP3	down	24.5385
ENSG00000119333	0.477874	1.47438e-26	2.91005e-25	WDR34	stable	24.5361
ENSG00000116830	0.65114	1.75045e-26	3.45027e-25	TTF2	up	24.4621
ENSG00000116745	-1.74507	1.8255e-26	3.59334e-25	RPE65	down	24.4445
ENSG00000270885	-0.602776	2.66605e-26	5.24083e-25	RASL10B	down	24.2806
ENSG00000106628	0.387809	2.81499e-26	5.52617e-25	POLD2	stable	24.2576
ENSG00000126878	-0.479431	2.85426e-26	5.59574e-25	AIF1L	stable	24.2521
ENSG00000148848	0.603183	3.04382e-26	5.95935e-25	ADAM12	up	24.2248
ENSG00000176971	-0.92172	3.38145e-26	6.6115e-25	FIBIN	down	24.1797
ENSG00000164463	-1.78162	3.64624e-26	7.11969e-25	CREBRF	down	24.1475
ENSG00000122574	-1.12883	4.1077e-26	8.01002e-25	WIPF3	down	24.0964
ENSG00000197879	0.60294	4.25028e-26	8.27699e-25	MYO1C	up	24.0821
ENSG00000146729	-0.590991	4.60415e-26	8.95415e-25	NIPSNAP2	down	24.048
ENSG00000101290	-0.50783	4.78634e-26	9.29608e-25	CDS2	stable	24.0317
ENSG00000092051	-0.792059	5.50142e-26	1.06707e-24	JPH4	down	23.9718
ENSG00000101384	0.36077	5.51574e-26	1.06843e-24	JAG1	stable	23.9713
ENSG00000010810	-0.458879	5.72353e-26	1.10721e-24	FYN	stable	23.9558
ENSG00000134318	0.551115	6.05295e-26	1.16938e-24	ROCK2	stable	23.932
ENSG00000130299	0.694044	6.22729e-26	1.20147e-24	GTPBP3	up	23.9203
ENSG00000113657	0.427009	6.54149e-26	1.26042e-24	DPYSL3	stable	23.8995
ENSG00000080824	0.404942	9.15878e-26	1.7624e-24	HSP90AA1	stable	23.7539
ENSG00000142192	-0.3353	9.46894e-26	1.81968e-24	APP	stable	23.74
ENSG00000144567	-0.573084	1.00513e-25	1.92906e-24	RETREG2	stable	23.7147
ENSG00000060982	0.391129	1.01336e-25	1.9423e-24	BCAT1	stable	23.7117
ENSG00000125835	0.464652	1.08036e-25	2.06801e-24	SNRPB	stable	23.6844
ENSG00000157542	0.87693	1.17517e-25	2.24653e-24	KCNJ6	up	23.6485
ENSG00000070601	1.60441	1.28045e-25	2.44459e-24	FRMPD1	up	23.6118
ENSG00000078699	-0.682277	1.43164e-25	2.72966e-24	CBFA2T2	down	23.5639
ENSG00000197558	-1.54261	1.63035e-25	3.10447e-24	SSPO	down	23.508
ENSG00000164818	0.543323	1.76342e-25	3.35349e-24	DNAAF5	stable	23.4745
ENSG00000196754	1.76765	1.77782e-25	3.37647e-24	S100A2	up	23.4715
ENSG00000173193	-0.792756	2.00663e-25	3.80608e-24	PARP14	down	23.4195
ENSG00000158710	0.453316	2.03059e-25	3.84651e-24	TAGLN2	stable	23.4149
ENSG00000142230	0.439117	2.60539e-25	4.92895e-24	SAE1	stable	23.3072
ENSG00000087074	-0.659364	2.68587e-25	5.07463e-24	PPP1R15A	down	23.2946
ENSG00000105464	-1.19047	2.80819e-25	5.29888e-24	GRIN2D	down	23.2758
ENSG00000151718	0.770872	2.81525e-25	5.30532e-24	WWC2	up	23.2753
ENSG00000168439	0.381922	2.8442e-25	5.35298e-24	STIP1	stable	23.2714
ENSG00000140105	0.45085	2.94756e-25	5.54036e-24	WARS	stable	23.2565
ENSG00000151725	0.646656	2.95298e-25	5.5434e-24	CENPU	up	23.2562
ENSG00000173273	-0.452442	2.9925e-25	5.61036e-24	TNKS	stable	23.251
ENSG00000089159	0.5457	3.00043e-25	5.618e-24	PXN	stable	23.2504
ENSG00000168393	0.59659	3.04049e-25	5.68571e-24	DTYMK	up	23.2452
ENSG00000166803	0.769264	3.25249e-25	6.07436e-24	PCLAF	up	23.2165
ENSG00000011426	0.410374	3.7243e-25	6.94663e-24	ANLN	stable	23.1582
ENSG00000261115	0.755949	3.93527e-25	7.33076e-24	TMEM178B	up	23.1349
ENSG00000179094	-0.639727	4.0393e-25	7.51496e-24	PER1	down	23.1241
ENSG00000166924	-1.29132	4.05743e-25	7.53907e-24	NYAP1	down	23.1227
ENSG00000101868	0.753815	4.24605e-25	7.87951e-24	POLA1	up	23.1035
ENSG00000154146	0.876361	4.64295e-25	8.60509e-24	NRGN	up	23.0652
ENSG00000111328	0.622551	4.66245e-25	8.63026e-24	CDK2AP1	up	23.064
ENSG00000142552	-0.845937	5.49997e-25	1.01676e-23	RCN3	down	22.9928
ENSG00000146006	-0.942419	5.6744e-25	1.04768e-23	LRRTM2	down	22.9798
ENSG00000108406	-0.507948	6.66352e-25	1.22875e-23	DHX40	stable	22.9105
ENSG00000169245	-1.62745	6.97466e-25	1.2845e-23	CXCL10	down	22.8913
ENSG00000122591	0.476212	7.02527e-25	1.29219e-23	FAM126A	stable	22.8887
ENSG00000111012	0.655944	7.91791e-25	1.45454e-23	CYP27B1	up	22.8373
ENSG00000108179	0.528335	8.10504e-25	1.48704e-23	PPIF	stable	22.8277
ENSG00000164362	1.01522	8.16355e-25	1.4959e-23	TERT	up	22.8251
ENSG00000100284	-0.850851	8.7978e-25	1.6101e-23	TOM1	down	22.7931
ENSG00000115548	-0.537975	9.38522e-25	1.71545e-23	KDM3A	stable	22.7656
ENSG00000167632	-0.678332	1.06371e-24	1.94183e-23	TRAPPC9	down	22.7118
ENSG00000095319	0.535778	1.27203e-24	2.31923e-23	NUP188	stable	22.6347
ENSG00000130844	0.744889	1.33084e-24	2.42343e-23	ZNF331	up	22.6156
ENSG00000138119	0.74171	1.47815e-24	2.68832e-23	MYOF	up	22.5705
ENSG00000105486	0.622483	1.51291e-24	2.74812e-23	LIG1	up	22.561
ENSG00000132361	0.506911	1.529e-24	2.77387e-23	CLUH	stable	22.5569
ENSG00000145685	0.935558	1.54202e-24	2.79403e-23	LHFPL2	up	22.5538
ENSG00000171208	0.493889	1.55901e-24	2.82131e-23	NETO2	stable	22.5495
ENSG00000134285	0.874893	1.79045e-24	3.23611e-23	FKBP11	up	22.49
ENSG00000055044	0.616868	1.82974e-24	3.30304e-23	NOP58	up	22.4811
ENSG00000160752	0.444343	1.83769e-24	3.3133e-23	FDPS	stable	22.4797
ENSG00000105185	0.751188	1.85505e-24	3.34047e-23	PDCD5	up	22.4762
ENSG00000046889	1.23197	1.91523e-24	3.44457e-23	PREX2	up	22.4629
ENSG00000100522	0.701473	1.94298e-24	3.49019e-23	GNPNAT1	up	22.4572
ENSG00000107201	-1.00009	1.94717e-24	3.49341e-23	DDX58	down	22.4568
ENSG00000277161	0.913385	1.97895e-24	3.54607e-23	PIGW	up	22.4503
ENSG00000038427	0.559404	1.98859e-24	3.55896e-23	VCAN	stable	22.4487
ENSG00000071655	0.393661	2.02234e-24	3.61493e-23	MBD3	stable	22.4419
ENSG00000007047	-0.672848	2.11861e-24	3.78238e-23	MARK4	down	22.4222
ENSG00000138434	-0.403903	2.24097e-24	3.99594e-23	ITPRID2	stable	22.3984
ENSG00000129173	1.26662	2.29904e-24	4.09448e-23	E2F8	up	22.3878
ENSG00000176490	-0.469676	2.31965e-24	4.12614e-23	DIRAS1	stable	22.3845
ENSG00000112559	-1.02887	2.45322e-24	4.35842e-23	MDFI	down	22.3607
ENSG00000062822	0.490911	2.76873e-24	4.91298e-23	POLD1	stable	22.3087
ENSG00000184787	0.469444	2.87458e-24	5.0946e-23	UBE2G2	stable	22.2929
ENSG00000182179	-1.48834	3.02191e-24	5.34922e-23	UBA7	down	22.2717
ENSG00000049541	0.557753	3.07242e-24	5.43203e-23	RFC2	stable	22.265
ENSG00000270647	0.48242	3.23064e-24	5.70486e-23	TAF15	stable	22.2438
ENSG00000160445	-0.714383	3.30246e-24	5.82464e-23	ZER1	down	22.2347
ENSG00000184992	0.673765	3.46836e-24	6.10985e-23	BRI3BP	up	22.214
ENSG00000170315	-0.445261	3.76465e-24	6.62379e-23	UBB	stable	22.1789
ENSG00000188529	0.430427	3.84177e-24	6.75133e-23	SRSF10	stable	22.1706
ENSG00000103888	0.717608	4.90859e-24	8.61573e-23	CEMIP	up	22.0647
ENSG00000124212	-1.38518	5.05217e-24	8.85709e-23	PTGIS	down	22.0527
ENSG00000160753	0.544307	5.49253e-24	9.61753e-23	RUSC1	stable	22.0169
ENSG00000140939	-0.738813	5.93146e-24	1.03737e-22	NOL3	down	21.9841
ENSG00000137825	0.84377	6.00218e-24	1.04848e-22	ITPKA	up	21.9794
ENSG00000132613	-0.662245	6.05264e-24	1.05603e-22	MTSS1L	down	21.9763
ENSG00000119938	-0.97876	6.09679e-24	1.06246e-22	PPP1R3C	down	21.9737
ENSG00000165916	0.448979	7.03899e-24	1.22519e-22	PSMC3	stable	21.9118
ENSG00000089063	-0.537999	7.27693e-24	1.26509e-22	TMEM230	stable	21.8979
ENSG00000164308	-0.806988	8.61113e-24	1.49526e-22	ERAP2	down	21.8253
ENSG00000113296	-0.646211	8.67841e-24	1.50515e-22	THBS4	down	21.8224
ENSG00000162434	-0.523826	9.42525e-24	1.63274e-22	JAK1	stable	21.7871
ENSG00000169242	-1.64608	9.44215e-24	1.63373e-22	EFNA1	down	21.7868
ENSG00000158292	-0.575807	9.59048e-24	1.65742e-22	GPR153	stable	21.7806
ENSG00000116750	0.671041	9.84665e-24	1.69968e-22	UCHL5	up	21.7696
ENSG00000006468	-0.409688	1.2191e-23	2.10187e-22	ETV1	stable	21.6774
ENSG00000150768	0.585101	1.25769e-23	2.16583e-22	DLAT	up	21.6644
ENSG00000039560	0.9948	1.27863e-23	2.19931e-22	RAI14	up	21.6577
ENSG00000259330	0.627669	1.29764e-23	2.22937e-22	INAFM2	up	21.6518
ENSG00000139178	-1.24098	1.36656e-23	2.34502e-22	C1RL	down	21.6299
ENSG00000182827	-0.606325	1.4402e-23	2.46848e-22	ACBD3	down	21.6076
ENSG00000071575	-0.327196	1.46524e-23	2.50845e-22	TRIB2	stable	21.6006
ENSG00000163507	0.698189	1.59308e-23	2.72412e-22	CIP2A	up	21.5648
ENSG00000185347	0.553339	1.67465e-23	2.86024e-22	TEDC1	stable	21.5436
ENSG00000113368	0.465974	1.69724e-23	2.89542e-22	LMNB1	stable	21.5383
ENSG00000083720	0.577399	1.70394e-23	2.90347e-22	OXCT1	stable	21.5371
ENSG00000117461	-0.564321	1.76748e-23	3.00822e-22	PIK3R3	stable	21.5217
ENSG00000247077	0.500013	1.80032e-23	3.06054e-22	PGAM5	stable	21.5142
ENSG00000124795	0.477162	1.80387e-23	3.06301e-22	DEK	stable	21.5139
ENSG00000103342	0.465046	1.86928e-23	3.17038e-22	GSPT1	stable	21.4989
ENSG00000116857	-0.537811	1.95857e-23	3.31796e-22	TMEM9	stable	21.4791
ENSG00000135624	0.404906	1.96606e-23	3.32679e-22	CCT7	stable	21.478
ENSG00000162337	-0.555417	2.16566e-23	3.6603e-22	LRP5	stable	21.4365
ENSG00000204950	-1.46871	2.21799e-23	3.74439e-22	LRRC10B	down	21.4266
ENSG00000117519	0.392914	2.43068e-23	4.09872e-22	CNN3	stable	21.3874
ENSG00000145220	1.00259	2.47862e-23	4.17473e-22	LYAR	up	21.3794
ENSG00000235162	0.678454	2.63924e-23	4.44013e-22	C12orf75	up	21.3526
ENSG00000110693	-0.619948	2.82832e-23	4.75275e-22	SOX6	down	21.3231
ENSG00000175920	2.42778	2.87704e-23	4.82906e-22	DOK7	up	21.3161
ENSG00000182752	1.30879	2.92589e-23	4.9054e-22	PAPPA	up	21.3093
ENSG00000159259	0.76543	3.07799e-23	5.15448e-22	CHAF1B	up	21.2878
ENSG00000073792	0.569495	3.56057e-23	5.95579e-22	IGF2BP2	stable	21.2251
ENSG00000127463	0.475277	3.65993e-23	6.11498e-22	EMC1	stable	21.2136
ENSG00000131409	-0.504811	3.81223e-23	6.36215e-22	LRRC4B	stable	21.1964
ENSG00000185022	0.59505	3.82399e-23	6.37449e-22	MAFF	up	21.1956
ENSG00000164713	-0.582066	3.87284e-23	6.44855e-22	BRI3	stable	21.1905
ENSG00000089351	-0.432026	4.06914e-23	6.76768e-22	GRAMD1A	stable	21.1696
ENSG00000119699	0.925687	4.30526e-23	7.15222e-22	TGFB3	up	21.1456
ENSG00000118257	0.521275	4.31454e-23	7.15949e-22	NRP2	stable	21.1451
ENSG00000168216	-0.99225	4.61379e-23	7.64736e-22	LMBRD1	down	21.1165
ENSG00000113369	-0.632971	4.77585e-23	7.90699e-22	ARRDC3	down	21.102
ENSG00000165271	0.607497	5.0297e-23	8.31783e-22	NOL6	up	21.08
ENSG00000134121	-1.82181	5.26893e-23	8.70359e-22	CHL1	down	21.0603
ENSG00000131558	-0.572198	5.50164e-23	9.07771e-22	EXOC4	stable	21.042
ENSG00000062485	0.39313	5.98779e-23	9.8687e-22	CS	stable	21.0057
ENSG00000136527	0.423893	6.39199e-23	1.0523e-21	TRA2B	stable	20.9779
ENSG00000181104	0.506337	6.42411e-23	1.05639e-21	F2R	stable	20.9762
ENSG00000119632	-0.931489	6.59657e-23	1.08353e-21	IFI27L2	down	20.9652
ENSG00000135929	-0.673872	6.93137e-23	1.13724e-21	CYP27A1	down	20.9441
ENSG00000169764	-0.53706	7.52323e-23	1.23297e-21	UGP2	stable	20.909
ENSG00000143799	0.357993	8.20227e-23	1.34274e-21	PARP1	stable	20.872
ENSG00000158467	-0.664298	8.63741e-23	1.41239e-21	AHCYL2	down	20.85
ENSG00000115738	-0.823147	8.78352e-23	1.43467e-21	ID2	down	20.8432
ENSG00000134215	1.19996	9.04049e-23	1.475e-21	VAV3	up	20.8312
ENSG00000105676	0.511336	9.3026e-23	1.51606e-21	ARMC6	stable	20.8193
ENSG00000134824	0.378097	9.65827e-23	1.57227e-21	FADS2	stable	20.8035
ENSG00000101412	0.575913	9.66988e-23	1.57241e-21	E2F1	stable	20.8034
ENSG00000164951	0.904122	9.78834e-23	1.5899e-21	PDP1	up	20.7986
ENSG00000109805	0.558023	9.91474e-23	1.60864e-21	NCAPG	stable	20.7935
ENSG00000133243	-0.409659	1.05625e-22	1.71183e-21	BTBD2	stable	20.7665
ENSG00000074181	-0.581864	1.08183e-22	1.75133e-21	NOTCH3	stable	20.7566
ENSG00000170144	0.397353	1.09328e-22	1.76791e-21	HNRNPA3	stable	20.7525
ENSG00000182963	0.66282	1.10926e-22	1.79177e-21	GJC1	up	20.7467
ENSG00000067445	-0.623191	1.13213e-22	1.82669e-21	TRO	down	20.7383
ENSG00000107537	-0.786836	1.20242e-22	1.93796e-21	PHYH	down	20.7127
ENSG00000153253	-1.17744	1.2129e-22	1.95269e-21	SCN3A	down	20.7094
ENSG00000158417	0.501649	1.29953e-22	2.08985e-21	EIF5B	stable	20.6799
ENSG00000100505	-0.398987	1.39159e-22	2.23544e-21	TRIM9	stable	20.6506
ENSG00000099139	0.984916	1.39772e-22	2.24281e-21	PCSK5	up	20.6492
ENSG00000116147	-2.4043	1.43758e-22	2.30424e-21	TNR	down	20.6375
ENSG00000151503	0.498987	1.43918e-22	2.30427e-21	NCAPD3	stable	20.6375
ENSG00000110090	-0.716845	1.48008e-22	2.36715e-21	CPT1A	down	20.6258
ENSG00000188976	0.408268	1.59677e-22	2.55099e-21	NOC2L	stable	20.5933
ENSG00000168924	0.520114	1.61735e-22	2.58104e-21	LETM1	stable	20.5882
ENSG00000163536	-0.70662	1.7943e-22	2.86028e-21	SERPINI1	down	20.5436
ENSG00000014216	-0.507559	1.91622e-22	3.05131e-21	CAPN1	stable	20.5155
ENSG00000149260	-0.714222	1.95162e-22	3.10429e-21	CAPN5	down	20.508
ENSG00000047648	0.689765	2.02073e-22	3.21071e-21	ARHGAP6	up	20.4934
ENSG00000067225	0.309643	2.05999e-22	3.26954e-21	PKM	stable	20.4855
ENSG00000132646	0.473274	2.27104e-22	3.60059e-21	PCNA	stable	20.4436
ENSG00000109861	0.654921	2.41428e-22	3.82352e-21	CTSC	up	20.4175
ENSG00000198933	-0.75134	2.41818e-22	3.82555e-21	TBKBP1	down	20.4173
ENSG00000188807	0.562977	2.53652e-22	4.00842e-21	TMEM201	stable	20.397
ENSG00000168411	0.529185	2.54408e-22	4.01601e-21	RFWD3	stable	20.3962
ENSG00000197261	1.56091	2.65554e-22	4.18743e-21	C6orf141	up	20.3781
ENSG00000178719	-0.364051	2.76545e-22	4.35603e-21	GRINA	stable	20.3609
ENSG00000184445	0.468268	3.02507e-22	4.75984e-21	KNTC1	stable	20.3224
ENSG00000062282	-1.14719	3.03271e-22	4.76671e-21	DGAT2	down	20.3218
ENSG00000138646	-0.976132	3.32617e-22	5.22233e-21	HERC5	down	20.2821
ENSG00000126822	0.741044	3.37063e-22	5.28646e-21	PLEKHG3	up	20.2768
ENSG00000157193	0.489518	3.66054e-22	5.73497e-21	LRP8	stable	20.2415
ENSG00000007255	-1.16385	3.81663e-22	5.97311e-21	TRAPPC6A	down	20.2238
ENSG00000104805	-0.409167	4.17646e-22	6.52924e-21	NUCB1	stable	20.1851
ENSG00000173457	0.483493	4.30536e-22	6.72355e-21	PPP1R14B	stable	20.1724
ENSG00000010295	-0.472609	4.31264e-22	6.72771e-21	IFFO1	stable	20.1721
ENSG00000091651	0.741743	4.4514e-22	6.93676e-21	ORC6	up	20.1588
ENSG00000149577	-0.954182	4.5854e-22	7.13796e-21	SIDT2	down	20.1464
ENSG00000167325	0.41761	4.77265e-22	7.42153e-21	RRM1	stable	20.1295
ENSG00000140464	-0.710195	5.08445e-22	7.89795e-21	PML	down	20.1025
ENSG00000198804	0.33729	5.29803e-22	8.22096e-21	MT-CO1	stable	20.0851
ENSG00000117318	-0.489205	5.48308e-22	8.49004e-21	ID3	stable	20.0711
ENSG00000005100	0.586396	5.48026e-22	8.49004e-21	DHX33	up	20.0711
ENSG00000130713	0.581271	5.77337e-22	8.93005e-21	EXOSC2	stable	20.0491
ENSG00000161813	0.549719	5.97529e-22	9.23258e-21	LARP4	stable	20.0347
ENSG00000166557	-0.544318	6.73219e-22	1.03911e-20	TMED3	stable	19.9833
ENSG00000184898	-1.49097	6.76034e-22	1.04235e-20	RBM43	down	19.982
ENSG00000244405	-0.462949	7.04385e-22	1.08492e-20	ETV5	stable	19.9646
ENSG00000090621	0.4242	7.38736e-22	1.13662e-20	PABPC4	stable	19.9444
ENSG00000091127	0.589342	7.64614e-22	1.1752e-20	PUS7	up	19.9299
ENSG00000164134	0.499469	7.68314e-22	1.17965e-20	NAA15	stable	19.9282
ENSG00000165029	-1.63815	8.4429e-22	1.29493e-20	ABCA1	down	19.8878
ENSG00000140534	0.644048	8.57363e-22	1.3136e-20	TICRR	up	19.8815
ENSG00000183955	0.552566	8.94736e-22	1.36942e-20	KMT5A	stable	19.8635
ENSG00000140365	0.531167	9.79058e-22	1.49691e-20	COMMD4	stable	19.8248
ENSG00000111783	-0.822409	1.0905e-21	1.66555e-20	RFX4	down	19.7784
ENSG00000178773	0.964954	1.19918e-21	1.82962e-20	CPNE7	up	19.7376
ENSG00000164930	-0.45709	1.20908e-21	1.8428e-20	FZD6	stable	19.7345
ENSG00000162490	-1.59633	1.27133e-21	1.93566e-20	DRAXIN	down	19.7132
ENSG00000239672	0.623177	1.42162e-21	2.16223e-20	NME1	up	19.6651
ENSG00000007968	0.748899	1.46338e-21	2.22343e-20	E2F2	up	19.653
ENSG00000111445	0.632671	1.5627e-21	2.37186e-20	RFC5	up	19.6249
ENSG00000112096	-0.53348	1.67487e-21	2.53947e-20	SOD2	stable	19.5953
ENSG00000198189	-0.916748	1.76585e-21	2.67462e-20	HSD17B11	down	19.5727
ENSG00000167766	0.591183	1.81303e-21	2.74324e-20	ZNF83	up	19.5617
ENSG00000148516	-0.472882	1.85337e-21	2.80138e-20	ZEB1	stable	19.5526
ENSG00000197961	0.574996	1.88326e-21	2.84361e-20	ZNF121	stable	19.5461
ENSG00000196642	0.395225	2.06768e-21	3.11885e-20	RABL6	stable	19.506
ENSG00000105642	-2.87223	2.07727e-21	3.13007e-20	KCNN1	down	19.5044
ENSG00000133606	-0.515605	2.16176e-21	3.25401e-20	MKRN1	stable	19.4876
ENSG00000174059	1.42213	2.54183e-21	3.82218e-20	CD34	up	19.4177
ENSG00000154978	0.425864	2.55025e-21	3.83089e-20	VOPP1	stable	19.4167
ENSG00000183696	0.879499	2.60131e-21	3.90357e-20	UPP1	up	19.4085
ENSG00000165792	0.585213	2.67645e-21	4.0122e-20	METTL17	up	19.3966
ENSG00000144583	-1.23553	2.90166e-21	4.34534e-20	2024-03-04	down	19.362
ENSG00000166123	0.49612	3.31226e-21	4.95514e-20	GPT2	stable	19.3049
ENSG00000167123	-0.630056	3.82023e-21	5.70921e-20	CERCAM	down	19.2434
ENSG00000158373	-1.84705	4.02748e-21	6.01278e-20	HIST1H2BD	down	19.2209
ENSG00000104626	0.541079	4.15816e-21	6.20152e-20	ERI1	stable	19.2075
ENSG00000103168	0.578017	4.21243e-21	6.27604e-20	TAF1C	stable	19.2023
ENSG00000115159	0.562537	4.45093e-21	6.62462e-20	GPD2	stable	19.1788
ENSG00000168906	0.364045	4.54038e-21	6.75086e-20	MAT2A	stable	19.1706
ENSG00000105612	-0.622639	4.62001e-21	6.86227e-20	DNASE2	down	19.1635
ENSG00000153885	0.4933	5.09592e-21	7.56146e-20	KCTD15	stable	19.1214
ENSG00000141858	0.508469	5.12546e-21	7.59756e-20	SAMD1	stable	19.1193
ENSG00000141994	0.521859	5.39629e-21	7.99089e-20	DUS3L	stable	19.0974
ENSG00000196376	0.646636	5.41419e-21	8.00927e-20	SLC35F1	up	19.0964
ENSG00000196743	-0.903393	5.69317e-21	8.41343e-20	GM2A	down	19.075
ENSG00000128228	0.536082	5.85003e-21	8.6365e-20	SDF2L1	stable	19.0637
ENSG00000204386	-0.429555	5.92464e-21	8.7378e-20	NEU1	stable	19.0586
ENSG00000275832	0.568746	7.07931e-21	1.04302e-19	ARHGAP23	stable	18.9817
ENSG00000271601	-0.477624	7.25822e-21	1.0683e-19	LIX1L	stable	18.9713
ENSG00000105355	-0.452695	7.36241e-21	1.08254e-19	PLIN3	stable	18.9656
ENSG00000104825	0.549046	7.61028e-21	1.11786e-19	NFKBIB	stable	18.9516
ENSG00000138688	-0.758492	8.14895e-21	1.19578e-19	KIAA1109	down	18.9223
ENSG00000102007	0.496185	8.75781e-21	1.28383e-19	PLP2	stable	18.8915
ENSG00000138018	0.462066	8.95466e-21	1.31137e-19	SELENOI	stable	18.8823
ENSG00000156970	0.498525	9.54952e-21	1.39708e-19	BUB1B	stable	18.8548
ENSG00000133321	-2.10724	1.08749e-20	1.58939e-19	RARRES3	down	18.7988
ENSG00000079482	-0.82096	1.12937e-20	1.64895e-19	OPHN1	down	18.7828
ENSG00000123240	-0.705494	1.22797e-20	1.79112e-19	OPTN	down	18.7469
ENSG00000152409	-1.06829	1.22935e-20	1.79133e-19	JMY	down	18.7468
ENSG00000198832	-1.43717	1.36216e-20	1.98288e-19	SELENOM	down	18.7027
ENSG00000108773	0.447881	1.43488e-20	2.08666e-19	KAT2A	stable	18.6805
ENSG00000197601	0.461656	1.45001e-20	2.10656e-19	FAR1	stable	18.6764
ENSG00000126453	0.620462	1.46731e-20	2.12956e-19	BCL2L12	up	18.6717
ENSG00000086544	-0.678344	1.52706e-20	2.21408e-19	ITPKC	down	18.6548
ENSG00000182095	-0.501039	1.55119e-20	2.24683e-19	TNRC18	stable	18.6484
ENSG00000167074	-0.761822	1.59438e-20	2.3071e-19	TEF	down	18.6369
ENSG00000163171	0.772653	1.6321e-20	2.35935e-19	CDC42EP3	up	18.6272
ENSG00000070214	-0.776951	1.68447e-20	2.43264e-19	SLC44A1	down	18.6139
ENSG00000189410	1.94172	1.72266e-20	2.48534e-19	SH2D5	up	18.6046
ENSG00000165480	0.853088	1.74555e-20	2.51587e-19	SKA3	up	18.5993
ENSG00000120899	-0.794862	1.9923e-20	2.86868e-19	PTK2B	down	18.5423
ENSG00000250510	-0.515149	2.08884e-20	3.00471e-19	GPR162	stable	18.5222
ENSG00000106028	0.55602	2.21249e-20	3.17945e-19	SSBP1	stable	18.4976
ENSG00000122687	0.480161	2.25245e-20	3.23368e-19	MRM2	stable	18.4903
ENSG00000169641	0.669929	2.33949e-20	3.35534e-19	LUZP1	up	18.4743
ENSG00000170381	-0.487514	2.60141e-20	3.72733e-19	SEMA3E	stable	18.4286
ENSG00000132879	-0.85334	2.7792e-20	3.97815e-19	FBXO44	down	18.4003
ENSG00000100439	-0.539159	2.94742e-20	4.21481e-19	ABHD4	stable	18.3752
ENSG00000063601	0.572024	3.02479e-20	4.32122e-19	MTMR1	stable	18.3644
ENSG00000165475	-1.2852	3.12298e-20	4.45712e-19	CRYL1	down	18.3509
ENSG00000251493	0.757115	3.229e-20	4.60392e-19	FOXD1	up	18.3369
ENSG00000111961	-0.627018	3.42795e-20	4.88283e-19	SASH1	down	18.3113
ENSG00000171681	-0.486551	3.50048e-20	4.98126e-19	ATF7IP	stable	18.3027
ENSG00000003147	-0.885201	3.55151e-20	5.04895e-19	ICA1	down	18.2968
ENSG00000168447	-1.85879	3.64119e-20	5.17142e-19	SCNN1B	down	18.2864
ENSG00000164054	-0.437613	3.71539e-20	5.27166e-19	SHISA5	stable	18.2781
ENSG00000155897	-2.32226	3.72231e-20	5.27635e-19	ADCY8	down	18.2777
ENSG00000068697	-0.483804	3.8427e-20	5.44171e-19	LAPTM4A	stable	18.2643
ENSG00000012660	0.413267	3.89847e-20	5.51533e-19	ELOVL5	stable	18.2584
ENSG00000111335	-1.77929	3.96788e-20	5.60809e-19	OAS2	down	18.2512
ENSG00000256043	-1.23917	4.00521e-20	5.65537e-19	CTSO	down	18.2475
ENSG00000197785	0.46191	4.0765e-20	5.75046e-19	ATAD3A	stable	18.2403
ENSG00000073111	0.473804	4.35143e-20	6.13237e-19	MCM2	stable	18.2124
ENSG00000139641	0.428767	4.6947e-20	6.60974e-19	ESYT1	stable	18.1798
ENSG00000135862	0.437725	4.72069e-20	6.63992e-19	LAMC1	stable	18.1778
ENSG00000139182	-0.785354	4.77259e-20	6.70645e-19	CLSTN3	down	18.1735
ENSG00000197299	0.676161	4.86073e-20	6.82374e-19	BLM	up	18.166
ENSG00000109881	0.539641	4.94181e-20	6.93088e-19	CCDC34	stable	18.1592
ENSG00000108830	-0.787368	5.31548e-20	7.4478e-19	RND2	down	18.128
ENSG00000104763	-0.448788	5.47273e-20	7.66078e-19	ASAH1	stable	18.1157
ENSG00000120694	0.426568	5.60875e-20	7.83614e-19	HSPH1	stable	18.1059
ENSG00000169032	0.478988	5.60585e-20	7.83614e-19	MAP2K1	stable	18.1059
ENSG00000137807	0.586392	5.64288e-20	7.87628e-19	KIF23	up	18.1037
ENSG00000050767	-1.55501	5.82048e-20	8.1164e-19	COL23A1	down	18.0906
ENSG00000197712	-1.13403	5.90821e-20	8.23086e-19	FAM114A1	down	18.0846
ENSG00000087191	0.477156	5.92037e-20	8.23994e-19	PSMC5	stable	18.0841
ENSG00000150093	0.376615	5.96154e-20	8.28933e-19	ITGB1	stable	18.0815
ENSG00000084774	0.526444	6.06648e-20	8.42721e-19	CAD	stable	18.0743
ENSG00000166166	0.537396	6.21087e-20	8.61958e-19	TRMT61A	stable	18.0645
ENSG00000085840	0.603709	6.38879e-20	8.85807e-19	ORC1	up	18.0527
ENSG00000105438	-0.36762	6.79389e-20	9.40187e-19	KDELR1	stable	18.0268
ENSG00000128191	0.539607	6.79152e-20	9.40187e-19	DGCR8	stable	18.0268
ENSG00000136450	0.520621	7.17647e-20	9.91249e-19	SRSF1	stable	18.0038
ENSG00000106078	0.642204	7.17106e-20	9.91249e-19	COBL	up	18.0038
ENSG00000146733	0.401478	7.24259e-20	9.99436e-19	PSPH	stable	18.0002
ENSG00000109339	-0.877942	7.3159e-20	1.0086e-18	MAPK10	down	17.9963
ENSG00000004534	0.495467	7.36011e-20	1.01374e-18	RBM6	stable	17.9941
ENSG00000070882	0.482867	7.45646e-20	1.02604e-18	OSBPL3	stable	17.9888
ENSG00000187498	0.396202	8.11208e-20	1.1152e-18	COL4A1	stable	17.9526
ENSG00000118785	-1.02852	8.31176e-20	1.14157e-18	SPP1	down	17.9425
ENSG00000089289	-0.688381	8.6547e-20	1.18756e-18	IGBP1	down	17.9253
ENSG00000160310	-0.447783	9.10177e-20	1.24773e-18	PRMT2	stable	17.9039
ENSG00000114999	0.471468	9.24235e-20	1.26581e-18	TTL	stable	17.8976
ENSG00000175166	0.356243	9.53635e-20	1.30485e-18	PSMD2	stable	17.8844
ENSG00000115884	0.49825	9.98804e-20	1.36537e-18	SDC1	stable	17.8647
ENSG00000174136	0.864495	1.03639e-19	1.41543e-18	RGMB	up	17.8491
ENSG00000144655	0.562771	1.04842e-19	1.43053e-18	CSRNP1	stable	17.8445
ENSG00000076382	0.465314	1.10515e-19	1.50652e-18	SPAG5	stable	17.822
ENSG00000125450	0.489804	1.13709e-19	1.5486e-18	NUP85	stable	17.8101
ENSG00000161671	-0.401226	1.13848e-19	1.54905e-18	EMC10	stable	17.8099
ENSG00000196262	0.376223	1.15715e-19	1.57299e-18	PPIA	stable	17.8033
ENSG00000143774	-0.445729	1.17457e-19	1.59518e-18	GUK1	stable	17.7972
ENSG00000100297	0.401445	1.18751e-19	1.61126e-18	MCM5	stable	17.7928
ENSG00000152952	-0.501036	1.22877e-19	1.66569e-18	PLOD2	stable	17.7784
ENSG00000121957	-0.543123	1.26747e-19	1.71656e-18	GPSM2	stable	17.7653
ENSG00000119912	0.621445	1.28168e-19	1.73419e-18	IDE	up	17.7609
ENSG00000138685	0.746007	1.30785e-19	1.76796e-18	FGF2	up	17.7525
ENSG00000074935	0.738115	1.34453e-19	1.81586e-18	TUBE1	up	17.7409
ENSG00000109320	0.548486	1.36729e-19	1.8449e-18	NFKB1	stable	17.734
ENSG00000125534	-0.462411	1.39379e-19	1.87892e-18	PPDPF	stable	17.7261
ENSG00000099783	0.381138	1.45097e-19	1.95419e-18	HNRNPM	stable	17.709
ENSG00000120756	0.671667	1.49206e-19	2.00767e-18	PLS1	up	17.6973
ENSG00000160606	-0.681926	1.56865e-19	2.10879e-18	TLCD1	down	17.676
ENSG00000117616	-0.672831	1.74818e-19	2.34797e-18	RSRP1	down	17.6293
ENSG00000197381	0.915479	1.79523e-19	2.40894e-18	ADARB1	up	17.6182
ENSG00000108309	-1.62998	1.97547e-19	2.64836e-18	RUNDC3A	down	17.577
ENSG00000164430	0.607414	2.1338e-19	2.858e-18	CGAS	up	17.5439
ENSG00000166682	-0.854833	2.14697e-19	2.873e-18	TMPRSS5	down	17.5417
ENSG00000023572	0.773535	2.17561e-19	2.90866e-18	GLRX2	up	17.5363
ENSG00000186187	0.596547	2.21303e-19	2.95598e-18	ZNRF1	up	17.5293
ENSG00000077152	0.61039	2.27283e-19	3.03308e-18	UBE2T	up	17.5181
ENSG00000107104	-0.436944	2.46018e-19	3.28009e-18	KANK1	stable	17.4841
ENSG00000187017	-4.73903	2.59057e-19	3.45078e-18	ESPN	down	17.4621
ENSG00000135451	0.509472	2.64286e-19	3.51723e-18	TROAP	stable	17.4538
ENSG00000131153	0.697864	2.64906e-19	3.52227e-18	GINS2	up	17.4532
ENSG00000138642	-1.29771	2.85688e-19	3.79513e-18	HERC6	down	17.4208
ENSG00000150593	-0.870783	2.95024e-19	3.91558e-18	PDCD4	down	17.4072
ENSG00000100201	-0.374592	2.95315e-19	3.91588e-18	DDX17	stable	17.4072
ENSG00000163541	-0.510516	3.06951e-19	4.06648e-18	SUCLG1	stable	17.3908
ENSG00000196428	0.722477	3.12581e-19	4.1373e-18	TSC22D2	up	17.3833
ENSG00000115255	-0.92253	3.17457e-19	4.19803e-18	REEP6	down	17.377
ENSG00000249992	0.366377	3.2446e-19	4.28676e-18	TMEM158	stable	17.3679
ENSG00000171444	0.549221	3.31257e-19	4.37259e-18	MCC	stable	17.3593
ENSG00000204060	-0.768697	3.36009e-19	4.43131e-18	FOXO6	down	17.3535
ENSG00000228253	0.902088	3.44593e-19	4.54041e-18	MT-ATP8	up	17.3429
ENSG00000092470	0.623576	3.51238e-19	4.61962e-18	WDR76	up	17.3354
ENSG00000174080	-1.11579	3.51044e-19	4.61962e-18	CTSF	down	17.3354
ENSG00000100592	-0.611034	3.59216e-19	4.71898e-18	DAAM1	down	17.3262
ENSG00000108479	-0.682844	3.59439e-19	4.71898e-18	GALK1	down	17.3262
ENSG00000074416	-0.768067	3.7071e-19	4.86257e-18	MGLL	down	17.3131
ENSG00000122034	0.462898	3.75886e-19	4.92603e-18	GTF3A	stable	17.3075
ENSG00000128973	0.588727	3.90469e-19	5.11255e-18	CLN6	up	17.2914
ENSG00000157216	-0.615927	4.10484e-19	5.3698e-18	SSBP3	down	17.27
ENSG00000113569	0.504261	4.12412e-19	5.39018e-18	NUP155	stable	17.2684
ENSG00000164615	-0.688099	4.15385e-19	5.42417e-18	CAMLG	down	17.2657
ENSG00000132470	-1.17616	4.3139e-19	5.62813e-18	ITGB4	down	17.2496
ENSG00000114767	0.598244	4.8646e-19	6.34093e-18	RRP9	up	17.1978
ENSG00000198837	0.515165	5.18299e-19	6.74991e-18	DENND4B	stable	17.1707
ENSG00000040608	-0.632051	5.37259e-19	6.9906e-18	RTN4R	down	17.1555
ENSG00000167107	-1.03297	5.51335e-19	7.16735e-18	ACSF2	down	17.1446
ENSG00000014138	0.831941	5.66581e-19	7.359e-18	POLA2	up	17.1332
ENSG00000167460	0.329573	5.87393e-19	7.62252e-18	TPM4	stable	17.1179
ENSG00000106031	-1.01002	6.02809e-19	7.81562e-18	HOXA13	down	17.107
ENSG00000130313	-0.525835	6.29294e-19	8.15176e-18	PGLS	stable	17.0887
ENSG00000169180	0.454917	6.31473e-19	8.17272e-18	XPO6	stable	17.0876
ENSG00000049759	-0.522229	6.33063e-19	8.18605e-18	NEDD4L	stable	17.0869
ENSG00000198805	0.522532	6.72818e-19	8.69241e-18	PNP	stable	17.0609
ENSG00000151779	-0.582559	6.9762e-19	9.00485e-18	NBAS	stable	17.0455
ENSG00000114850	0.438886	7.43415e-19	9.58749e-18	SSR3	stable	17.0183
ENSG00000143977	0.679539	8.57715e-19	1.10518e-17	SNRPG	up	16.9566
ENSG00000166226	0.386133	8.78783e-19	1.13133e-17	CCT2	stable	16.9464
ENSG00000060688	0.476198	9.10263e-19	1.17082e-17	SNRNP40	stable	16.9315
ENSG00000163399	-0.321069	9.66542e-19	1.24211e-17	ATP1A1	stable	16.9058
ENSG00000174669	0.847783	9.86497e-19	1.26664e-17	SLC29A2	up	16.8973
ENSG00000128335	-0.849048	1.00929e-18	1.29477e-17	APOL2	down	16.8878
ENSG00000127951	-1.86064	1.02651e-18	1.3157e-17	FGL2	down	16.8808
ENSG00000140511	-0.907616	1.1769e-18	1.50713e-17	HAPLN3	down	16.8218
ENSG00000154917	-0.91402	1.20188e-18	1.53777e-17	RAB6B	down	16.8131
ENSG00000114270	0.761451	1.26785e-18	1.62076e-17	COL7A1	up	16.7903
ENSG00000074800	0.290661	1.29534e-18	1.65446e-17	ENO1	stable	16.7813
ENSG00000198938	0.343447	1.3034e-18	1.66328e-17	MT-CO3	stable	16.779
ENSG00000116584	0.32409	1.37856e-18	1.75767e-17	ARHGEF2	stable	16.7551
ENSG00000106344	0.464555	1.40554e-18	1.7905e-17	RBM28	stable	16.747
ENSG00000093000	0.436567	1.49435e-18	1.90197e-17	NUP50	stable	16.7208
ENSG00000188070	-0.493539	1.53354e-18	1.95015e-17	C11orf95	stable	16.7099
ENSG00000198042	0.577984	1.55385e-18	1.97426e-17	MAK16	stable	16.7046
ENSG00000140853	-0.688377	1.55862e-18	1.9786e-17	NLRC5	down	16.7036
ENSG00000198417	-1.60047	1.56209e-18	1.98127e-17	MT1F	down	16.7031
ENSG00000169100	-0.337284	1.57381e-18	1.99441e-17	SLC25A6	stable	16.7002
ENSG00000064651	0.40914	1.58459e-18	2.00633e-17	SLC12A2	stable	16.6976
ENSG00000145545	0.55864	1.60096e-18	2.02529e-17	SRD5A1	stable	16.6935
ENSG00000164597	-0.554132	1.62321e-18	2.05165e-17	COG5	stable	16.6879
ENSG00000213694	-0.731732	1.6319e-18	2.06085e-17	S1PR3	down	16.686
ENSG00000172590	0.595239	1.65381e-18	2.08672e-17	MRPL52	up	16.6805
ENSG00000167522	0.522117	1.66857e-18	2.10353e-17	ANKRD11	stable	16.6771
ENSG00000158828	-1.1393	1.6817e-18	2.11825e-17	PINK1	down	16.674
ENSG00000128165	0.63539	1.81235e-18	2.28084e-17	ADM2	up	16.6419
ENSG00000104731	0.675138	1.86977e-18	2.35107e-17	KLHDC4	up	16.6287
ENSG00000160326	0.462699	1.91961e-18	2.41167e-17	SLC2A6	stable	16.6177
ENSG00000120438	0.461387	1.99462e-18	2.50375e-17	TCP1	stable	16.6014
ENSG00000163714	0.411889	2.01777e-18	2.53063e-17	U2SURP	stable	16.5968
ENSG00000103227	-0.776337	2.06982e-18	2.59368e-17	LMF1	down	16.5861
ENSG00000171476	1.43762	2.07397e-18	2.59665e-17	HOPX	up	16.5856
ENSG00000026950	-0.918078	2.11699e-18	2.64824e-17	BTN3A1	down	16.577
ENSG00000132341	0.418213	2.13193e-18	2.66464e-17	RAN	stable	16.5744
ENSG00000173281	-0.679928	2.14779e-18	2.68216e-17	PPP1R3B	down	16.5715
ENSG00000041982	0.792136	2.15352e-18	2.68547e-17	TNC	up	16.571
ENSG00000036565	-3.00913	2.15412e-18	2.68547e-17	SLC18A1	down	16.571
ENSG00000104131	0.479689	2.19155e-18	2.7298e-17	EIF3J	stable	16.5639
ENSG00000025039	-0.839442	2.21576e-18	2.7576e-17	RRAGD	down	16.5595
ENSG00000130203	-1.28062	2.22622e-18	2.7659e-17	APOE	down	16.5582
ENSG00000196358	-2.38312	2.22496e-18	2.7659e-17	NTNG2	down	16.5582
ENSG00000136710	-0.677723	2.25663e-18	2.80129e-17	CCDC115	down	16.5526
ENSG00000101104	0.681055	2.26105e-18	2.8044e-17	PABPC1L	up	16.5522
ENSG00000136010	0.587939	2.4326e-18	3.01461e-17	ALDH1L2	up	16.5208
ENSG00000139645	0.535393	2.4431e-18	3.02504e-17	ANKRD52	stable	16.5193
ENSG00000181656	-2.11338	2.4923e-18	3.08335e-17	GPR88	down	16.511
ENSG00000167491	0.413073	2.51518e-18	3.10902e-17	GATAD2A	stable	16.5074
ENSG00000180900	0.313424	2.53745e-18	3.13388e-17	SCRIB	stable	16.5039
ENSG00000179115	0.376614	2.58055e-18	3.18442e-17	FARSA	stable	16.497
ENSG00000187801	1.02411	2.66423e-18	3.28491e-17	ZFP69B	up	16.4835
ENSG00000115761	0.624349	2.70733e-18	3.33523e-17	NOL10	up	16.4769
ENSG00000012963	0.483322	2.71243e-18	3.3387e-17	UBR7	stable	16.4764
ENSG00000196584	0.642234	2.81678e-18	3.46421e-17	XRCC2	up	16.4604
ENSG00000131591	0.569576	2.82723e-18	3.47414e-17	C1orf159	stable	16.4592
ENSG00000156398	0.934595	2.83067e-18	3.47543e-17	SFXN2	up	16.459
ENSG00000100994	0.31258	2.94381e-18	3.61131e-17	PYGB	stable	16.4423
ENSG00000109685	0.414724	3.20982e-18	3.93432e-17	NSD2	stable	16.4051
ENSG00000139970	-0.40377	3.39361e-18	4.1561e-17	RTN1	stable	16.3813
ENSG00000168003	0.332693	3.40696e-18	4.16895e-17	SLC3A2	stable	16.38
ENSG00000155561	0.363436	3.45583e-18	4.2252e-17	NUP205	stable	16.3742
ENSG00000156976	-0.450989	3.49247e-18	4.26643e-17	EIF4A2	stable	16.3699
ENSG00000152056	1.13904	3.63475e-18	4.43653e-17	AP1S3	up	16.353
ENSG00000119917	-1.09326	3.6515e-18	4.45324e-17	IFIT3	down	16.3513
ENSG00000146263	0.681141	3.74229e-18	4.56015e-17	MMS22L	up	16.341
ENSG00000135899	-1.39045	3.83589e-18	4.6703e-17	SP110	down	16.3307
ENSG00000116455	0.693364	3.84217e-18	4.67405e-17	WDR77	up	16.3303
ENSG00000155850	-0.630535	3.8615e-18	4.69366e-17	SLC26A2	down	16.3285
ENSG00000145687	-0.715063	4.05142e-18	4.92039e-17	SSBP2	down	16.308
ENSG00000177283	-0.380702	4.11417e-18	4.99245e-17	FZD8	stable	16.3017
ENSG00000110048	-0.414174	4.28546e-18	5.19598e-17	OSBP	stable	16.2843
ENSG00000119711	-0.659131	4.34345e-18	5.26192e-17	ALDH6A1	down	16.2789
ENSG00000132589	-0.330425	4.53442e-18	5.48872e-17	FLOT2	stable	16.2605
ENSG00000126067	0.447203	4.56632e-18	5.52275e-17	PSMB2	stable	16.2578
ENSG00000034152	0.522509	4.58371e-18	5.53919e-17	MAP2K3	stable	16.2566
ENSG00000005513	-0.506139	4.63651e-18	5.59836e-17	SOX8	stable	16.2519
ENSG00000156103	-0.551344	4.8091e-18	5.80194e-17	MMP16	stable	16.2364
ENSG00000087253	0.662282	5.10358e-18	6.15214e-17	LPCAT2	up	16.211
ENSG00000141076	0.479439	5.22855e-18	6.29757e-17	UTP4	stable	16.2008
ENSG00000103018	0.416347	5.23983e-18	6.30595e-17	CYB5B	stable	16.2002
ENSG00000147813	-0.438889	5.32039e-18	6.39762e-17	NAPRT	stable	16.194
ENSG00000126456	0.476393	5.39254e-18	6.47904e-17	IRF3	stable	16.1885
ENSG00000178235	-1.48214	5.73456e-18	6.88431e-17	SLITRK1	down	16.1621
ENSG00000105197	0.423381	6.31914e-18	7.57985e-17	TIMM50	stable	16.1203
ENSG00000186918	-0.552203	6.35144e-18	7.61234e-17	ZNF395	stable	16.1185
ENSG00000047346	-1.10445	6.6585e-18	7.97379e-17	FAM214A	down	16.0983
ENSG00000049239	-0.566372	7.07978e-18	8.47134e-17	H6PD	stable	16.072
ENSG00000090097	0.386368	7.2152e-18	8.6263e-17	PCBP4	stable	16.0642
ENSG00000125977	0.493479	7.30105e-18	8.7218e-17	EIF2S2	stable	16.0594
ENSG00000183255	-0.364636	7.65828e-18	9.14106e-17	PTTG1IP	stable	16.039
ENSG00000146281	0.674523	7.73811e-18	9.22879e-17	PM20D2	up	16.0349
ENSG00000161277	-1.04353	8.51325e-18	1.0145e-16	THAP8	down	15.9937
ENSG00000097021	0.392195	8.72505e-18	1.03889e-16	ACOT7	stable	15.9834
ENSG00000114686	0.464247	8.96415e-18	1.06649e-16	MRPL3	stable	15.972
ENSG00000179958	0.560792	9.4769e-18	1.12657e-16	DCTPP1	stable	15.9482
ENSG00000180957	0.469281	9.56208e-18	1.13577e-16	PITPNB	stable	15.9447
ENSG00000168090	0.390155	9.57209e-18	1.13603e-16	COPS6	stable	15.9446
ENSG00000159131	0.397147	9.66869e-18	1.14563e-16	GART	stable	15.941
ENSG00000136492	0.640723	9.66381e-18	1.14563e-16	BRIP1	up	15.941
ENSG00000198712	0.39193	9.72578e-18	1.15146e-16	MT-CO2	stable	15.9388
ENSG00000138085	-0.464068	9.94891e-18	1.17692e-16	ATRAID	stable	15.9293
ENSG00000160299	0.520075	1.01621e-17	1.20117e-16	PCNT	stable	15.9204
ENSG00000119285	0.529167	1.05696e-17	1.24833e-16	HEATR1	stable	15.9037
ENSG00000119969	0.658678	1.08381e-17	1.279e-16	HELLS	up	15.8931
ENSG00000119335	0.329439	1.09177e-17	1.28736e-16	SET	stable	15.8903
ENSG00000131507	-0.487197	1.15464e-17	1.35978e-16	NDFIP1	stable	15.8665
ENSG00000164574	0.615883	1.15506e-17	1.35978e-16	GALNT10	up	15.8665
ENSG00000130024	0.478471	1.15914e-17	1.36348e-16	PHF10	stable	15.8654
ENSG00000110002	-1.09844	1.18271e-17	1.39009e-16	VWA5A	down	15.857
ENSG00000176597	0.677948	1.21885e-17	1.43141e-16	B3GNT5	up	15.8442
ENSG00000100139	0.441339	1.2325e-17	1.44628e-16	MICALL1	stable	15.8397
ENSG00000174444	-0.333893	1.24878e-17	1.46421e-16	RPL4	stable	15.8344
ENSG00000122547	-0.620603	1.27599e-17	1.49491e-16	EEPD1	down	15.8254
ENSG00000137449	-0.470988	1.39267e-17	1.63029e-16	CPEB2	stable	15.7877
ENSG00000128512	-0.478957	1.40081e-17	1.6385e-16	DOCK4	stable	15.7856
ENSG00000115504	0.469798	1.47047e-17	1.71861e-16	EHBP1	stable	15.7648
ENSG00000107937	0.479342	1.50748e-17	1.76045e-16	GTPBP4	stable	15.7544
ENSG00000185163	0.587819	1.52818e-17	1.7832e-16	DDX51	up	15.7488
ENSG00000167775	0.395616	1.60057e-17	1.86618e-16	CD320	stable	15.729
ENSG00000147324	0.525483	1.84302e-17	2.14714e-16	MFHAS1	stable	15.6681
ENSG00000159147	0.680953	1.93209e-17	2.24912e-16	DONSON	up	15.648
ENSG00000100726	0.46918	1.96883e-17	2.29006e-16	TELO2	stable	15.6402
ENSG00000111602	0.398449	2.03217e-17	2.36185e-16	TIMELESS	stable	15.6267
ENSG00000154839	0.767833	2.05682e-17	2.3886e-16	SKA1	up	15.6219
ENSG00000204574	0.401852	2.25009e-17	2.61096e-16	ABCF1	stable	15.5832
ENSG00000051341	0.794028	2.27508e-17	2.63786e-16	POLQ	up	15.5787
ENSG00000120915	-1.30468	2.27909e-17	2.64042e-16	EPHX2	down	15.5783
ENSG00000105290	-0.684616	2.30243e-17	2.66534e-16	APLP1	down	15.5742
ENSG00000110628	-0.88428	2.48023e-17	2.86889e-16	SLC22A18	down	15.5423
ENSG00000169230	0.524851	2.52962e-17	2.92369e-16	PRELID1	stable	15.5341
ENSG00000113645	0.795432	2.63115e-17	3.03864e-16	WWC1	up	15.5173
ENSG00000135316	0.39399	2.64621e-17	3.05361e-16	SYNCRIP	stable	15.5152
ENSG00000179604	0.332061	2.65776e-17	3.06451e-16	CDC42EP4	stable	15.5136
ENSG00000175567	0.401514	2.70324e-17	3.11449e-16	UCP2	stable	15.5066
ENSG00000120699	0.632059	2.71206e-17	3.12219e-16	EXOSC8	up	15.5055
ENSG00000099864	-1.27119	2.71957e-17	3.12837e-16	PALM	down	15.5047
ENSG00000170961	-0.691075	2.72378e-17	3.13074e-16	HAS2	down	15.5044
ENSG00000164303	-1.36589	2.7341e-17	3.14013e-16	ENPP6	down	15.5031
ENSG00000184465	0.736587	2.78461e-17	3.19561e-16	WDR27	up	15.4954
ENSG00000174748	-0.343416	2.90673e-17	3.33053e-16	RPL15	stable	15.4775
ENSG00000137575	-0.597653	2.9046e-17	3.33053e-16	SDCBP	down	15.4775
ENSG00000107731	-0.988028	2.91308e-17	3.33518e-16	UNC5B	down	15.4769
ENSG00000196781	-0.390452	2.96725e-17	3.39453e-16	TLE1	stable	15.4692
ENSG00000141522	0.35441	2.97441e-17	3.40006e-16	ARHGDIA	stable	15.4685
ENSG00000120889	0.36235	3.50377e-17	4.00204e-16	TNFRSF10B	stable	15.3977
ENSG00000204388	-0.545433	3.56091e-17	4.06411e-16	HSPA1B	stable	15.391
ENSG00000105137	0.467526	3.61847e-17	4.12658e-16	SYDE1	stable	15.3844
ENSG00000145362	-0.471826	3.87716e-17	4.41815e-16	ANK2	stable	15.3548
ENSG00000148411	0.515973	3.90479e-17	4.44616e-16	NACC2	stable	15.352
ENSG00000161888	0.646837	3.93209e-17	4.47374e-16	SPC24	up	15.3493
ENSG00000070423	0.376759	3.99679e-17	4.54382e-16	RNF126	stable	15.3426
ENSG00000089195	0.527425	4.22214e-17	4.79627e-16	TRMT6	stable	15.3191
ENSG00000177108	-1.46223	4.30937e-17	4.89155e-16	ZDHHC22	down	15.3106
ENSG00000179409	0.487144	4.35621e-17	4.94088e-16	GEMIN4	stable	15.3062
ENSG00000168394	-0.466248	4.41851e-17	5.00764e-16	TAP1	stable	15.3004
ENSG00000213024	0.397877	5.1376e-17	5.81809e-16	NUP62	stable	15.2352
ENSG00000138092	0.594374	5.46272e-17	6.18147e-16	CENPO	up	15.2089
ENSG00000068438	0.561976	5.85791e-17	6.62352e-16	FTSJ1	stable	15.1789
ENSG00000175215	-0.373515	5.9162e-17	6.68425e-16	CTDSP2	stable	15.1749
ENSG00000106460	-0.470615	5.98693e-17	6.75892e-16	TMEM106B	stable	15.1701
ENSG00000186470	-0.853102	6.11306e-17	6.89599e-16	BTN3A2	down	15.1614
ENSG00000174442	0.537639	6.49784e-17	7.32438e-16	ZWILCH	stable	15.1352
ENSG00000138035	0.579517	6.64297e-17	7.48219e-16	PNPT1	stable	15.126
ENSG00000163683	-0.866198	6.72435e-17	7.568e-16	SMIM14	down	15.121
ENSG00000182944	0.312837	7.04046e-17	7.91767e-16	EWSR1	stable	15.1014
ENSG00000105519	-0.994714	7.04732e-17	7.91927e-16	CAPS	down	15.1013
ENSG00000101333	-0.641433	7.16792e-17	8.0486e-16	PLCB4	down	15.0943
ENSG00000148429	0.494444	7.21412e-17	8.09424e-16	USP6NL	stable	15.0918
ENSG00000076716	0.4684	7.5359e-17	8.44878e-16	GPC4	stable	15.0732
ENSG00000169213	-0.609641	7.66969e-17	8.59218e-16	RAB3B	down	15.0659
ENSG00000242485	0.464394	7.81001e-17	8.74265e-16	MRPL20	stable	15.0584
ENSG00000172115	0.432546	7.93694e-17	8.87793e-16	CYCS	stable	15.0517
ENSG00000108821	-3.26284	8.36677e-17	9.35155e-16	COL1A1	down	15.0291
ENSG00000074582	0.640738	8.41131e-17	9.39413e-16	BCS1L	up	15.0271
ENSG00000160888	0.52024	8.50492e-17	9.49141e-16	IER2	stable	15.0227
ENSG00000088325	0.314664	8.83366e-17	9.85075e-16	TPX2	stable	15.0065
ENSG00000100311	0.824322	9.50347e-17	1.05815e-15	PDGFB	up	14.9755
ENSG00000091879	1.51053	9.49918e-17	1.05815e-15	ANGPT2	up	14.9755
ENSG00000158195	-0.433017	9.83267e-17	1.09314e-15	WASF2	stable	14.9613
ENSG00000174721	0.447678	9.82904e-17	1.09314e-15	FGFBP3	stable	14.9613
ENSG00000166483	0.436461	1.0017e-16	1.11278e-15	WEE1	stable	14.9536
ENSG00000125285	-0.715044	1.00529e-16	1.11591e-15	SOX21	down	14.9524
ENSG00000181924	0.479659	1.0476e-16	1.162e-15	COA4	stable	14.9348
ENSG00000116237	0.373566	1.0601e-16	1.17498e-15	ICMT	stable	14.93
ENSG00000137941	0.502341	1.17161e-16	1.29758e-15	TTLL7	stable	14.8869
ENSG00000099800	0.415356	1.24149e-16	1.37393e-15	TIMM13	stable	14.862
ENSG00000249115	0.512027	1.29209e-16	1.42884e-15	HAUS5	stable	14.845
ENSG00000136824	0.477349	1.30953e-16	1.44703e-15	SMC2	stable	14.8395
ENSG00000103742	-0.572961	1.33364e-16	1.47255e-15	IGDCC4	stable	14.8319
ENSG00000160325	-0.782929	1.36046e-16	1.50104e-15	CACFD1	down	14.8236
ENSG00000130508	0.470894	1.4078e-16	1.55209e-15	PXDN	stable	14.8091
ENSG00000104967	-0.637648	1.4613e-16	1.60985e-15	NOVA2	down	14.7932
ENSG00000100647	-0.495685	1.48833e-16	1.6384e-15	SUSD6	stable	14.7856
ENSG00000120539	0.577366	1.50351e-16	1.65387e-15	MASTL	stable	14.7815
ENSG00000165861	-0.656801	1.50648e-16	1.65588e-15	ZFYVE1	down	14.781
ENSG00000116741	0.982511	1.55785e-16	1.71105e-15	RGS2	up	14.7667
ENSG00000165821	-0.49041	1.57679e-16	1.73055e-15	SALL2	stable	14.7618
ENSG00000167680	-1.33976	1.59361e-16	1.7477e-15	SEMA6B	down	14.7575
ENSG00000165244	0.6763	1.67707e-16	1.83784e-15	ZNF367	up	14.7357
ENSG00000144320	-0.510805	1.82241e-16	1.99562e-15	LNPK	stable	14.6999
ENSG00000125746	-0.717203	2.00364e-16	2.19243e-15	EML2	down	14.6591
ENSG00000185359	0.393465	2.00662e-16	2.19298e-15	HGS	stable	14.659
ENSG00000042832	-0.752761	2.00715e-16	2.19298e-15	TG	down	14.659
ENSG00000140450	-1.21491	2.00901e-16	2.19337e-15	ARRDC4	down	14.6589
ENSG00000116171	-0.435972	2.02972e-16	2.21432e-15	SCP2	stable	14.6548
ENSG00000196220	-0.873399	2.03806e-16	2.22176e-15	SRGAP3	down	14.6533
ENSG00000049656	0.41424	2.05889e-16	2.24279e-15	CLPTM1L	stable	14.6492
ENSG00000183010	0.373882	2.06575e-16	2.24858e-15	PYCR1	stable	14.6481
ENSG00000120727	-0.644663	2.0919e-16	2.27535e-15	PAIP2	down	14.643
ENSG00000198089	0.624031	2.1671e-16	2.35539e-15	SFI1	up	14.6279
ENSG00000101294	0.302368	2.16954e-16	2.35628e-15	HM13	stable	14.6278
ENSG00000181588	0.400493	2.19432e-16	2.38142e-15	MEX3D	stable	14.6232
ENSG00000124356	0.469853	2.21147e-16	2.39825e-15	STAMBP	stable	14.6201
ENSG00000076604	-0.306572	2.24094e-16	2.4266e-15	TRAF4	stable	14.615
ENSG00000181381	-0.758994	2.2409e-16	2.4266e-15	DDX60L	down	14.615
ENSG00000153187	0.27033	2.31717e-16	2.50728e-15	HNRNPU	stable	14.6008
ENSG00000198720	0.514071	2.38747e-16	2.58144e-15	ANKRD13B	stable	14.5881
ENSG00000139668	0.573217	2.45691e-16	2.65455e-15	WDFY2	stable	14.576
ENSG00000120278	0.515775	2.58095e-16	2.78651e-15	PLEKHG1	stable	14.5549
ENSG00000124207	0.353637	2.71227e-16	2.92612e-15	CSE1L	stable	14.5337
ENSG00000149328	0.755821	2.71481e-16	2.9267e-15	GLB1L2	up	14.5336
ENSG00000142864	0.325072	2.72469e-16	2.93301e-15	SERBP1	stable	14.5327
ENSG00000117411	0.375044	2.72313e-16	2.93301e-15	B4GALT2	stable	14.5327
ENSG00000083067	-0.438939	2.74977e-16	2.95783e-15	TRPM3	stable	14.529
ENSG00000169188	0.553919	2.86205e-16	3.07633e-15	APEX2	stable	14.512
ENSG00000167524	1.15255	2.92387e-16	3.14047e-15	SGK494	up	14.503
ENSG00000172889	-0.76447	2.9478e-16	3.16384e-15	EGFL7	down	14.4998
ENSG00000141556	0.386745	2.95196e-16	3.16598e-15	TBCD	stable	14.4995
ENSG00000106244	0.372985	3.00056e-16	3.21574e-15	PDAP1	stable	14.4927
ENSG00000179750	0.601561	3.20279e-16	3.42995e-15	APOBEC3B	up	14.4647
ENSG00000182809	-0.411424	3.22274e-16	3.44878e-15	CRIP2	stable	14.4623
ENSG00000105426	-0.488044	3.38768e-16	3.62263e-15	PTPRS	stable	14.441
ENSG00000068903	-0.453638	3.83213e-16	4.0949e-15	SIRT2	stable	14.3878
ENSG00000149932	-0.570676	3.85259e-16	4.11329e-15	TMEM219	stable	14.3858
ENSG00000173801	-0.950223	3.85497e-16	4.11329e-15	JUP	down	14.3858
ENSG00000070961	-0.307848	3.94356e-16	4.20474e-15	ATP2B1	stable	14.3763
ENSG00000112029	0.586612	3.99622e-16	4.25777e-15	FBXO5	up	14.3708
ENSG00000175906	-0.912904	4.00417e-16	4.26313e-15	ARL4D	down	14.3703
ENSG00000115687	0.78792	4.11394e-16	4.3768e-15	PASK	up	14.3588
ENSG00000135547	-0.94671	4.16924e-16	4.4324e-15	HEY2	down	14.3534
ENSG00000144959	0.894329	4.18688e-16	4.44791e-15	NCEH1	up	14.3518
ENSG00000173674	0.447976	4.2374e-16	4.4983e-15	EIF1AX	stable	14.347
ENSG00000165527	0.320168	4.41778e-16	4.68611e-15	ARF6	stable	14.3292
ENSG00000121653	-0.394864	4.42074e-16	4.68611e-15	MAPK8IP1	stable	14.3292
ENSG00000110013	-0.847262	4.44485e-16	4.70824e-15	SIAE	down	14.3271
ENSG00000127528	-0.782188	4.45617e-16	4.71682e-15	KLF2	down	14.3264
ENSG00000167536	-0.506898	4.46779e-16	4.72568e-15	DHRS13	stable	14.3255
ENSG00000164938	-1.06961	4.72261e-16	4.99159e-15	TP53INP1	down	14.3018
ENSG00000147874	0.425243	5.02672e-16	5.30918e-15	HAUS6	stable	14.275
ENSG00000104936	0.464198	5.08506e-16	5.36691e-15	DMPK	stable	14.2703
ENSG00000104408	-0.425182	5.11584e-16	5.39549e-15	EIF3E	stable	14.268
ENSG00000124098	-0.503754	5.22242e-16	5.50392e-15	FAM210B	stable	14.2593
ENSG00000121753	-0.401785	5.27171e-16	5.55185e-15	ADGRB2	stable	14.2556
ENSG00000100219	0.377027	5.30015e-16	5.57778e-15	XBP1	stable	14.2535
ENSG00000198563	0.435719	5.36384e-16	5.64073e-15	DDX39B	stable	14.2487
ENSG00000135763	0.529897	5.49922e-16	5.77894e-15	URB2	stable	14.2382
ENSG00000127663	-0.442746	5.55028e-16	5.8284e-15	KDM4B	stable	14.2345
ENSG00000115875	0.394692	5.58628e-16	5.86198e-15	SRSF7	stable	14.232
ENSG00000143036	-2.03807	5.64316e-16	5.91741e-15	SLC44A3	down	14.2279
ENSG00000179331	0.710284	5.74496e-16	6.01982e-15	RAB39A	up	14.2204
ENSG00000050405	0.335269	5.84892e-16	6.12437e-15	LIMA1	stable	14.2129
ENSG00000197170	0.469259	6.11298e-16	6.39627e-15	PSMD12	stable	14.1941
ENSG00000044574	0.317299	6.3317e-16	6.62037e-15	HSPA5	stable	14.1791
ENSG00000105639	-2.49431	6.59945e-16	6.89538e-15	JAK3	down	14.1614
ENSG00000109686	1.99823	6.729e-16	7.02571e-15	SH3D19	up	14.1533
ENSG00000159403	-0.693665	6.85156e-16	7.14856e-15	C1R	down	14.1458
ENSG00000012048	0.499154	6.92354e-16	7.21849e-15	BRCA1	stable	14.1416
ENSG00000184897	-0.388078	7.24122e-16	7.54432e-15	H1FX	stable	14.1224
ENSG00000189057	0.672339	7.31379e-16	7.61448e-15	FAM111B	up	14.1184
ENSG00000114923	-0.580308	7.39075e-16	7.68912e-15	SLC4A3	stable	14.1141
ENSG00000130222	-2.38647	7.68183e-16	7.98625e-15	GADD45G	down	14.0977
ENSG00000035862	-0.351848	7.74356e-16	8.0447e-15	TIMP2	stable	14.0945
ENSG00000198554	0.502297	7.78224e-16	8.07913e-15	WDHD1	stable	14.0926
ENSG00000169926	-0.537919	7.7947e-16	8.0863e-15	KLF13	stable	14.0922
ENSG00000105514	-0.786776	8.16788e-16	8.46743e-15	RAB3D	down	14.0722
ENSG00000198794	-0.61475	8.27614e-16	8.57357e-15	SCAMP5	down	14.0668
ENSG00000138190	0.646019	8.38115e-16	8.67619e-15	EXOC6	up	14.0617
ENSG00000020577	0.561093	8.56937e-16	8.86474e-15	SAMD4A	stable	14.0523
ENSG00000091947	-0.616571	8.63469e-16	8.92598e-15	TMEM101	down	14.0493
ENSG00000213420	-0.503971	8.77383e-16	9.0634e-15	GPC2	stable	14.0427
ENSG00000204410	0.836754	8.81661e-16	9.10114e-15	MSH5	up	14.0409
ENSG00000172175	0.612428	8.93182e-16	9.21354e-15	MALT1	up	14.0356
ENSG00000196576	0.368219	9.06948e-16	9.34894e-15	PLXNB2	stable	14.0292
ENSG00000128596	-0.945811	9.08326e-16	9.35653e-15	CCDC136	down	14.0289
ENSG00000182606	-0.475422	9.28025e-16	9.55269e-15	TRAK1	stable	14.0199
ENSG00000153044	0.655569	9.30909e-16	9.57563e-15	CENPH	up	14.0188
ENSG00000176022	0.394109	9.40965e-16	9.67225e-15	B3GALT6	stable	14.0145
ENSG00000126947	-0.899607	9.61813e-16	9.87958e-15	ARMCX1	down	14.0053
ENSG00000149582	-0.651839	9.69995e-16	9.95662e-15	TMEM25	down	14.0019
ENSG00000090530	3.03899	9.77507e-16	1.00267e-14	P3H2	up	13.9988
ENSG00000132182	0.552359	1.01694e-15	1.04239e-14	NUP210	stable	13.982
ENSG00000179314	-0.369019	1.02104e-15	1.04585e-14	WSCD1	stable	13.9805
ENSG00000139438	-0.802181	1.03789e-15	1.06236e-14	FAM222A	down	13.9737
ENSG00000049540	-0.405503	1.07128e-15	1.09577e-14	ELN	stable	13.9603
ENSG00000113810	0.347232	1.07477e-15	1.09857e-14	SMC4	stable	13.9592
ENSG00000197498	0.572795	1.07566e-15	1.09871e-14	RPF2	stable	13.9591
ENSG00000162909	0.373686	1.08638e-15	1.10888e-14	CAPN2	stable	13.9551
ENSG00000108010	0.553255	1.09849e-15	1.12046e-14	GLRX3	stable	13.9506
ENSG00000028310	0.532766	1.10077e-15	1.122e-14	BRD9	stable	13.95
ENSG00000112578	0.581713	1.10361e-15	1.12411e-14	BYSL	stable	13.9492
ENSG00000058804	0.422336	1.10682e-15	1.12659e-14	NDC1	stable	13.9482
ENSG00000065717	-0.808383	1.1367e-15	1.1562e-14	TLE2	down	13.937
ENSG00000100593	-2.61326	1.15633e-15	1.17535e-14	ISM2	down	13.9298
ENSG00000160877	0.371602	1.16781e-15	1.18619e-14	NACC1	stable	13.9258
ENSG00000162601	0.502186	1.216e-15	1.23428e-14	MYSM1	stable	13.9086
ENSG00000061273	0.488759	1.31374e-15	1.33256e-14	HDAC7	stable	13.8753
ENSG00000111300	0.505006	1.32678e-15	1.34485e-14	NAA25	stable	13.8713
ENSG00000176444	0.4518	1.35141e-15	1.36887e-14	CLK2	stable	13.8636
ENSG00000187079	0.42318	1.40207e-15	1.41919e-14	TEAD1	stable	13.848
ENSG00000179761	-0.537968	1.41126e-15	1.4275e-14	PIPOX	stable	13.8454
ENSG00000114353	-0.303342	1.41453e-15	1.42983e-14	GNAI2	stable	13.8447
ENSG00000160917	0.403082	1.44569e-15	1.46031e-14	CPSF4	stable	13.8356
ENSG00000167740	-0.731038	1.53422e-15	1.54866e-14	CYB5D2	down	13.81
ENSG00000155660	0.290984	1.5382e-15	1.55161e-14	PDIA4	stable	13.8092
ENSG00000163840	-0.61156	1.54863e-15	1.56105e-14	DTX3L	down	13.8066
ENSG00000106211	-0.363365	1.55449e-15	1.56587e-14	HSPB1	stable	13.8052
ENSG00000145860	0.452586	1.5661e-15	1.57648e-14	RNF145	stable	13.8023
ENSG00000120705	0.391083	1.56947e-15	1.57878e-14	ETF1	stable	13.8017
ENSG00000109586	0.638022	1.59149e-15	1.59982e-14	GALNT7	up	13.7959
ENSG00000166886	0.39871	1.6085e-15	1.61581e-14	NAB2	stable	13.7916
ENSG00000106261	-0.391974	1.65019e-15	1.65655e-14	ZKSCAN1	stable	13.7808
ENSG00000112242	0.607336	1.75046e-15	1.756e-14	E2F3	up	13.7555
ENSG00000178764	-0.587555	1.75797e-15	1.76232e-14	ZHX2	down	13.7539
ENSG00000116685	-0.373773	1.77299e-15	1.77553e-14	KIAA2013	stable	13.7507
ENSG00000117984	-0.453494	1.77358e-15	1.77553e-14	CTSD	stable	13.7507
ENSG00000141458	0.420583	1.96126e-15	1.96206e-14	NPC1	stable	13.7073
ENSG00000205531	0.325212	2.02438e-15	2.02382e-14	NAP1L4	stable	13.6938
ENSG00000113649	0.419598	2.10752e-15	2.1055e-14	TCERG1	stable	13.6766
ENSG00000090924	0.510658	2.21348e-15	2.20984e-14	PLEKHG2	stable	13.6556
ENSG00000066027	-0.469557	2.24283e-15	2.23762e-14	PPP2R5A	stable	13.6502
ENSG00000137700	0.58492	2.32449e-15	2.3175e-14	SLC37A4	stable	13.635
ENSG00000177700	0.447911	2.54615e-15	2.53676e-14	POLR2L	stable	13.5957
ENSG00000006062	0.777923	2.67177e-15	2.66009e-14	MAP3K14	up	13.5751
ENSG00000147677	-0.377143	2.68117e-15	2.66764e-14	EIF3H	stable	13.5739
ENSG00000134453	0.511083	2.907e-15	2.89035e-14	RBM17	stable	13.539
ENSG00000179388	0.56212	2.9142e-15	2.89554e-14	EGR3	stable	13.5383
ENSG00000143401	0.378524	3.00532e-15	2.98405e-14	ANP32E	stable	13.5252
ENSG00000165795	-0.703079	3.02571e-15	3.00224e-14	NDRG2	down	13.5226
ENSG00000157227	-0.275246	3.04565e-15	3.01997e-14	MMP14	stable	13.52
ENSG00000130725	0.375986	3.055e-15	3.02719e-14	UBE2M	stable	13.519
ENSG00000023909	0.619382	3.06132e-15	3.0314e-14	GCLM	up	13.5184
ENSG00000133872	-0.383592	3.1316e-15	3.09889e-14	SARAF	stable	13.5088
ENSG00000138180	0.506382	3.34935e-15	3.31211e-14	CEP55	stable	13.4799
ENSG00000169756	0.578678	3.42926e-15	3.38884e-14	LIMS1	stable	13.4699
ENSG00000104219	-0.473977	3.60298e-15	3.5581e-14	ZDHHC2	stable	13.4488
ENSG00000119707	0.358511	3.63415e-15	3.58645e-14	RBM25	stable	13.4453
ENSG00000069424	-1.00365	3.64612e-15	3.59582e-14	KCNAB2	down	13.4442
ENSG00000076924	-0.424475	3.75356e-15	3.69929e-14	XAB2	stable	13.4319
ENSG00000110328	0.715502	3.91041e-15	3.85126e-14	GALNT18	up	13.4144
ENSG00000157150	-1.51309	3.92165e-15	3.85973e-14	TIMP4	down	13.4134
ENSG00000164946	-1.11342	4.20334e-15	4.13419e-14	FREM1	down	13.3836
ENSG00000125355	-0.556429	4.28648e-15	4.21311e-14	TMEM255A	stable	13.3754
ENSG00000135829	0.302449	4.44685e-15	4.36779e-14	DHX9	stable	13.3597
ENSG00000139116	-0.365585	4.53035e-15	4.44682e-14	KIF21A	stable	13.352
ENSG00000109084	0.341146	4.53739e-15	4.45073e-14	TMEM97	stable	13.3516
ENSG00000108784	-0.473919	4.54765e-15	4.4578e-14	NAGLU	stable	13.3509
ENSG00000169045	0.382891	4.77197e-15	4.67454e-14	HNRNPH1	stable	13.3303
ENSG00000136114	0.824045	4.9e-15	4.79673e-14	THSD1	up	13.3191
ENSG00000136699	0.436802	5.00876e-15	4.89992e-14	SMPD4	stable	13.3098
ENSG00000125354	-0.666789	5.16445e-15	5.04883e-14	2024-09-06	down	13.2968
ENSG00000196083	0.383794	5.33329e-15	5.21041e-14	IL1RAP	stable	13.2831
ENSG00000136270	0.3309	5.35152e-15	5.22472e-14	TBRG4	stable	13.2819
ENSG00000188735	0.53104	5.58233e-15	5.44641e-14	TMEM120B	stable	13.2639
ENSG00000221829	0.485427	5.59794e-15	5.45799e-14	FANCG	stable	13.263
ENSG00000225697	0.565602	5.73926e-15	5.59204e-14	SLC26A6	stable	13.2524
ENSG00000179041	0.830435	5.83848e-15	5.68492e-14	RRS1	up	13.2453
ENSG00000145833	0.391748	5.99544e-15	5.83385e-14	DDX46	stable	13.234
ENSG00000160087	0.419121	6.0613e-15	5.89401e-14	UBE2J2	stable	13.2296
ENSG00000162738	-0.441798	6.21534e-15	6.03977e-14	VANGL2	stable	13.219
ENSG00000102271	0.566482	6.28376e-15	6.10219e-14	KLHL4	stable	13.2145
ENSG00000127527	0.427607	6.29017e-15	6.10436e-14	EPS15L1	stable	13.2144
ENSG00000196924	0.655777	6.32167e-15	6.13085e-14	FLNA	up	13.2125
ENSG00000183856	0.571578	6.68623e-15	6.48009e-14	IQGAP3	stable	13.1884
ENSG00000162975	0.397387	6.78961e-15	6.57591e-14	KCNF1	stable	13.182
ENSG00000147416	-0.303832	7.07038e-15	6.8433e-14	ATP6V1B2	stable	13.1647
ENSG00000111247	0.573516	7.21046e-15	6.97426e-14	RAD51AP1	stable	13.1565
ENSG00000103326	0.478302	7.23688e-15	6.99517e-14	CAPN15	stable	13.1552
ENSG00000162944	-1.14749	7.32256e-15	7.0733e-14	RFTN2	down	13.1504
ENSG00000110987	-0.529263	7.70526e-15	7.43804e-14	BCL7A	stable	13.1285
ENSG00000068079	-0.812627	7.84375e-15	7.56673e-14	IFI35	down	13.1211
ENSG00000160075	0.353132	8.59696e-15	8.28786e-14	SSU72	stable	13.0816
ENSG00000155962	-0.94851	8.86014e-15	8.53593e-14	CLIC2	down	13.0687
ENSG00000138413	-0.37295	8.96188e-15	8.62825e-14	IDH1	stable	13.0641
ENSG00000117266	-0.751367	8.982e-15	8.64192e-14	CDK18	down	13.0634
ENSG00000029363	0.331511	9.12645e-15	8.7751e-14	BCLAF1	stable	13.0567
ENSG00000149489	-1.2292	9.43485e-15	9.06566e-14	ROM1	down	13.0426
ENSG00000173207	0.51044	9.51957e-15	9.14104e-14	CKS1B	stable	13.039
ENSG00000243678	1.15668	1.02806e-14	9.86529e-14	NME2	up	13.0059
ENSG00000138801	-0.488677	1.08274e-14	1.03832e-13	PAPSS1	stable	12.9837
ENSG00000160058	-0.471399	1.09628e-14	1.05061e-13	BSDC1	stable	12.9786
ENSG00000143162	-0.783906	1.12321e-14	1.07571e-13	CREG1	down	12.9683
ENSG00000215717	-0.582308	1.1303e-14	1.08179e-13	TMEM167B	stable	12.9659
ENSG00000144043	0.430496	1.13823e-14	1.08867e-13	TEX261	stable	12.9631
ENSG00000136938	0.402778	1.18522e-14	1.13287e-13	ANP32B	stable	12.9458
ENSG00000160360	-0.380637	1.21543e-14	1.16099e-13	GPSM1	stable	12.9352
ENSG00000108021	0.494769	1.2611e-14	1.20382e-13	FAM208B	stable	12.9194
ENSG00000106554	0.440164	1.26741e-14	1.20905e-13	CHCHD3	stable	12.9176
ENSG00000102572	0.500966	1.27284e-14	1.21344e-13	STK24	stable	12.916
ENSG00000171163	0.48212	1.29167e-14	1.23059e-13	ZNF692	stable	12.9099
ENSG00000127561	-0.75152	1.34473e-14	1.27946e-13	SYNGR3	down	12.893
ENSG00000165633	-0.832148	1.34392e-14	1.27946e-13	VSTM4	down	12.893
ENSG00000105767	-0.390093	1.38605e-14	1.31792e-13	CADM4	stable	12.8801
ENSG00000122507	-0.815716	1.39962e-14	1.32996e-13	BBS9	down	12.8762
ENSG00000071967	-0.587048	1.41268e-14	1.3415e-13	CYBRD1	down	12.8724
ENSG00000164032	0.361906	1.41479e-14	1.34263e-13	H2AFZ	stable	12.872
ENSG00000132471	-0.37447	1.42331e-14	1.34983e-13	WBP2	stable	12.8697
ENSG00000105323	0.316608	1.46467e-14	1.38815e-13	HNRNPUL1	stable	12.8576
ENSG00000154639	0.584878	1.47764e-14	1.39953e-13	CXADR	stable	12.854
ENSG00000158604	-0.317254	1.48297e-14	1.40368e-13	TMED4	stable	12.8527
ENSG00000197043	-0.407424	1.50867e-14	1.42707e-13	ANXA6	stable	12.8456
ENSG00000131351	0.664205	1.52559e-14	1.44215e-13	HAUS8	up	12.841
ENSG00000135476	0.491383	1.6581e-14	1.56639e-13	ESPL1	stable	12.8051
ENSG00000148843	0.427639	1.66335e-14	1.57033e-13	PDCD11	stable	12.804
ENSG00000090238	-1.03626	1.66864e-14	1.57431e-13	YPEL3	down	12.8029
ENSG00000170581	-0.428595	1.76842e-14	1.66736e-13	STAT2	stable	12.778
ENSG00000102900	0.419822	1.85751e-14	1.75023e-13	NUP93	stable	12.7569
ENSG00000118181	-0.344327	1.93231e-14	1.81954e-13	RPS25	stable	12.74
ENSG00000013288	-0.657199	2.05437e-14	1.93323e-13	MAN2B2	down	12.7137
ENSG00000145907	0.327285	2.11982e-14	1.99354e-13	G3BP1	stable	12.7004
ENSG00000100836	0.372602	2.18871e-14	2.057e-13	PABPN1	stable	12.6868
ENSG00000177542	0.399959	2.22257e-14	2.08747e-13	SLC25A22	stable	12.6804
ENSG00000089157	-0.280663	2.35649e-14	2.21183e-13	RPLP0	stable	12.6552
ENSG00000167526	-0.317914	2.41197e-14	2.26244e-13	RPL13	stable	12.6454
ENSG00000110107	0.339721	2.60233e-14	2.43944e-13	PRPF19	stable	12.6127
ENSG00000147155	0.503955	2.62151e-14	2.45584e-13	EBP	stable	12.6098
ENSG00000111845	0.700845	2.67055e-14	2.50017e-13	PAK1IP1	up	12.602
ENSG00000237649	0.418221	2.68212e-14	2.50939e-13	KIFC1	stable	12.6004
ENSG00000171865	0.577098	2.71076e-14	2.53456e-13	RNASEH1	stable	12.5961
ENSG00000147065	0.314937	2.76911e-14	2.58746e-13	MSN	stable	12.5871
ENSG00000169718	0.404631	2.88345e-14	2.69085e-13	DUS1L	stable	12.5701
ENSG00000134986	-0.415416	2.88298e-14	2.69085e-13	NREP	stable	12.5701
ENSG00000154845	0.377816	2.89244e-14	2.69751e-13	PPP4R1	stable	12.569
ENSG00000143621	0.40123	2.94082e-14	2.74089e-13	ILF2	stable	12.5621
ENSG00000148082	-0.403087	2.99089e-14	2.78576e-13	SHC3	stable	12.5551
ENSG00000116106	0.712631	3.4704e-14	3.23033e-13	EPHA4	up	12.4908
ENSG00000174775	0.426313	3.55105e-14	3.3033e-13	HRAS	stable	12.4811
ENSG00000126602	0.403589	3.56056e-14	3.31002e-13	TRAP1	stable	12.4802
ENSG00000171045	-0.943133	3.64473e-14	3.38612e-13	TSNARE1	down	12.4703
ENSG00000163918	0.576265	3.67346e-14	3.41064e-13	RFC4	stable	12.4672
ENSG00000185238	0.593878	3.68938e-14	3.42324e-13	PRMT3	up	12.4656
ENSG00000095303	-1.02287	3.7219e-14	3.45122e-13	PTGS1	down	12.462
ENSG00000102003	-0.440687	3.75562e-14	3.48027e-13	SYP	stable	12.4584
ENSG00000140400	0.453577	3.84887e-14	3.56442e-13	MAN2C1	stable	12.448
ENSG00000091483	0.468851	3.98849e-14	3.69137e-13	FH	stable	12.4328
ENSG00000198795	-0.503829	4.04311e-14	3.73956e-13	ZNF521	stable	12.4272
ENSG00000114416	-0.38971	4.0599e-14	3.75033e-13	FXR1	stable	12.4259
ENSG00000151576	0.577951	4.05911e-14	3.75033e-13	QTRT2	stable	12.4259
ENSG00000167363	-0.941753	4.07624e-14	3.76304e-13	FN3K	down	12.4245
ENSG00000114626	-1.16169	4.22216e-14	3.89528e-13	ABTB1	down	12.4095
ENSG00000106268	0.475028	4.32667e-14	3.98918e-13	NUDT1	stable	12.3991
ENSG00000163517	-1.29754	4.38269e-14	4.03828e-13	HDAC11	down	12.3938
ENSG00000147475	-0.369933	4.39559e-14	4.0476e-13	ERLIN2	stable	12.3928
ENSG00000126215	0.430935	4.64185e-14	4.27167e-13	XRCC3	stable	12.3694
ENSG00000128606	-1.08558	4.71623e-14	4.33738e-13	LRRC17	down	12.3628
ENSG00000180340	-0.581437	5.07763e-14	4.66681e-13	FZD2	stable	12.331
ENSG00000137857	-1.42035	5.22904e-14	4.80295e-13	DUOX1	down	12.3185
ENSG00000133422	0.408897	5.31212e-14	4.87619e-13	MORC2	stable	12.3119
ENSG00000173744	0.432414	5.39534e-14	4.94946e-13	AGFG1	stable	12.3054
ENSG00000196363	0.428465	5.48422e-14	5.02783e-13	WDR5	stable	12.2986
ENSG00000142657	0.294566	5.49931e-14	5.0385e-13	PGD	stable	12.2977
ENSG00000231925	-0.38456	5.56054e-14	5.0914e-13	TAPBP	stable	12.2932
ENSG00000177954	-0.411208	5.57802e-14	5.10421e-13	RPS27	stable	12.2921
ENSG00000090006	-0.324916	5.64149e-14	5.15905e-13	LTBP4	stable	12.2874
ENSG00000175792	0.458889	6.04607e-14	5.52557e-13	RUVBL1	stable	12.2576
ENSG00000111581	0.408116	6.12e-14	5.58962e-13	NUP107	stable	12.2526
ENSG00000151923	0.428435	6.31448e-14	5.76364e-13	TIAL1	stable	12.2393
ENSG00000096093	0.495947	6.32516e-14	5.76978e-13	EFHC1	stable	12.2388
ENSG00000106829	-0.460066	6.35121e-14	5.7863e-13	TLE4	stable	12.2376
ENSG00000128059	0.480854	6.34905e-14	5.7863e-13	PPAT	stable	12.2376
ENSG00000099991	-0.413286	6.57947e-14	5.98678e-13	CABIN1	stable	12.2228
ENSG00000187555	0.379134	6.57551e-14	5.98678e-13	USP7	stable	12.2228
ENSG00000196141	0.362041	6.61143e-14	6.01212e-13	SPATS2L	stable	12.221
ENSG00000136100	0.570864	6.82954e-14	6.20376e-13	VPS36	stable	12.2073
ENSG00000157087	-0.773343	6.83069e-14	6.20376e-13	ATP2B2	down	12.2073
ENSG00000086300	-0.69851	6.94546e-14	6.30408e-13	SNX10	down	12.2004
ENSG00000096384	0.290647	7.16894e-14	6.50287e-13	HSP90AB1	stable	12.1869
ENSG00000213699	0.432846	7.17949e-14	6.50839e-13	SLC35F6	stable	12.1865
ENSG00000171067	0.431856	7.38194e-14	6.68776e-13	C11orf24	stable	12.1747
ENSG00000145934	0.50695	7.62886e-14	6.90717e-13	TENM2	stable	12.1607
ENSG00000197635	-0.538331	7.82757e-14	7.08269e-13	DPP4	stable	12.1498
ENSG00000121210	0.712924	7.89484e-14	7.13913e-13	TMEM131L	up	12.1464
ENSG00000006459	-0.917444	8.38168e-14	7.57467e-13	KDM7A	down	12.1206
ENSG00000130589	-0.474149	8.40168e-14	7.58804e-13	HELZ2	stable	12.1199
ENSG00000178685	-0.907156	8.40961e-14	7.5905e-13	PARP10	down	12.1197
ENSG00000042493	-0.467617	8.48084e-14	7.65007e-13	CAPG	stable	12.1163
ENSG00000103449	-0.381304	8.49984e-14	7.66247e-13	SALL1	stable	12.1156
ENSG00000115966	-0.482529	8.93894e-14	8.05333e-13	ATF2	stable	12.094
ENSG00000166845	0.518097	8.99803e-14	8.10156e-13	C18orf54	stable	12.0914
ENSG00000123095	0.542485	9.14713e-14	8.23072e-13	BHLHE41	stable	12.0846
ENSG00000100258	0.351812	9.18151e-14	8.25657e-13	LMF2	stable	12.0832
ENSG00000185838	0.561487	9.28026e-14	8.34022e-13	GNB1L	stable	12.0788
ENSG00000100321	-0.475195	9.35903e-14	8.40584e-13	SYNGR1	stable	12.0754
ENSG00000196715	0.44411	9.41232e-14	8.4485e-13	VKORC1L1	stable	12.0732
ENSG00000160211	0.351041	9.60671e-14	8.61768e-13	G6PD	stable	12.0646
ENSG00000101577	-0.376111	9.63327e-14	8.6362e-13	LPIN2	stable	12.0637
ENSG00000175048	0.574589	9.67533e-14	8.66857e-13	ZDHHC14	stable	12.0621
ENSG00000080503	-0.420767	9.75209e-14	8.73198e-13	SMARCA2	stable	12.0589
ENSG00000178295	0.535603	9.84042e-14	8.80567e-13	GEN1	stable	12.0552
ENSG00000138031	0.478349	1.00353e-13	8.97455e-13	ADCY3	stable	12.047
ENSG00000197081	0.483424	1.01447e-13	9.0668e-13	IGF2R	stable	12.0425
ENSG00000136813	0.437337	1.05102e-13	9.38774e-13	ECPAS	stable	12.0274
ENSG00000129219	-0.596141	1.05742e-13	9.43909e-13	PLD2	down	12.0251
ENSG00000042317	-1.1652	1.06997e-13	9.54529e-13	SPATA7	down	12.0202
ENSG00000128285	-1.23932	1.08867e-13	9.7062e-13	MCHR1	down	12.013
ENSG00000184207	0.454611	1.09424e-13	9.74395e-13	PGP	stable	12.0113
ENSG00000182463	-0.689983	1.09397e-13	9.74395e-13	TSHZ2	down	12.0113
ENSG00000206053	0.369257	1.12982e-13	1.00547e-12	JPT2	stable	11.9976
ENSG00000167085	0.427112	1.1335e-13	1.00812e-12	PHB	stable	11.9965
ENSG00000182628	0.413875	1.15687e-13	1.02828e-12	SKA2	stable	11.9879
ENSG00000108852	-0.604335	1.18155e-13	1.04958e-12	MPP2	down	11.979
ENSG00000129351	0.275982	1.22556e-13	1.08801e-12	ILF3	stable	11.9634
ENSG00000133103	-0.637019	1.24672e-13	1.10612e-12	COG6	down	11.9562
ENSG00000135114	-1.69794	1.28831e-13	1.14232e-12	OASL	down	11.9422
ENSG00000176208	0.669649	1.30733e-13	1.15848e-12	ATAD5	up	11.9361
ENSG00000048052	0.323699	1.32333e-13	1.17195e-12	HDAC9	stable	11.9311
ENSG00000168395	0.479958	1.409e-13	1.24706e-12	ING5	stable	11.9041
ENSG00000153113	0.397956	1.41413e-13	1.25085e-12	CAST	stable	11.9028
ENSG00000127241	-2.21899	1.49381e-13	1.32053e-12	MASP1	down	11.8793
ENSG00000115825	0.358609	1.53892e-13	1.35958e-12	PRKD3	stable	11.8666
ENSG00000144283	0.35812	1.56336e-13	1.38034e-12	PKP4	stable	11.86
ENSG00000141971	-0.427876	1.60056e-13	1.41147e-12	MVB12A	stable	11.8503
ENSG00000132563	-0.42311	1.60015e-13	1.41147e-12	REEP2	stable	11.8503
ENSG00000128951	0.405979	1.63804e-13	1.44365e-12	DUT	stable	11.8405
ENSG00000172269	0.462285	1.64343e-13	1.44753e-12	DPAGT1	stable	11.8394
ENSG00000156273	-0.41737	1.65812e-13	1.45959e-12	BACH1	stable	11.8358
ENSG00000104823	-0.467958	1.70396e-13	1.49903e-12	ECH1	stable	11.8242
ENSG00000180008	0.415211	1.72038e-13	1.51256e-12	SOCS4	stable	11.8203
ENSG00000115226	-0.753217	1.74716e-13	1.53518e-12	FNDC4	down	11.8138
ENSG00000172053	-0.342432	1.76301e-13	1.54818e-12	QARS	stable	11.8102
ENSG00000096060	0.593961	1.84874e-13	1.62249e-12	FKBP5	up	11.7898
ENSG00000161011	-0.307748	1.98335e-13	1.73958e-12	SQSTM1	stable	11.7596
ENSG00000182732	-0.56497	1.98984e-13	1.74422e-12	RGS6	stable	11.7584
ENSG00000172005	-1.19285	2.03948e-13	1.78666e-12	MAL	down	11.748
ENSG00000131771	-1.58156	2.0445e-13	1.78998e-12	PPP1R1B	down	11.7472
ENSG00000108592	0.416045	2.10312e-13	1.8402e-12	FTSJ3	stable	11.7351
ENSG00000145604	0.505879	2.11969e-13	1.85359e-12	SKP2	stable	11.732
ENSG00000164199	-0.597401	2.23607e-13	1.95418e-12	ADGRV1	down	11.709
ENSG00000119906	0.468237	2.25127e-13	1.96629e-12	SLF2	stable	11.7064
ENSG00000114439	-0.400945	2.33691e-13	2.03987e-12	BBX	stable	11.6904
ENSG00000118515	0.870322	2.3507e-13	2.05068e-12	SGK1	up	11.6881
ENSG00000115307	0.354247	2.35542e-13	2.05356e-12	AUP1	stable	11.6875
ENSG00000137207	-0.387281	2.36245e-13	2.05846e-12	YIPF3	stable	11.6865
ENSG00000092010	-0.435077	2.5438e-13	2.21515e-12	PSME1	stable	11.6546
ENSG00000162426	-0.963643	2.5502e-13	2.21941e-12	SLC45A1	down	11.6538
ENSG00000109323	-0.787123	2.56317e-13	2.22936e-12	MANBA	down	11.6518
ENSG00000137124	0.438118	2.6393e-13	2.29421e-12	ALDH1B1	stable	11.6394
ENSG00000112941	0.497386	2.64375e-13	2.29671e-12	TENT4A	stable	11.6389
ENSG00000277972	0.526877	2.67309e-13	2.32081e-12	CISD3	stable	11.6344
ENSG00000141030	0.406156	2.69202e-13	2.33509e-12	COPS3	stable	11.6317
ENSG00000100418	0.431126	2.69273e-13	2.33509e-12	DESI1	stable	11.6317
ENSG00000125734	-0.441195	2.69992e-13	2.33993e-12	GPR108	stable	11.6308
ENSG00000137872	-0.285449	2.79807e-13	2.42256e-12	SEMA6D	stable	11.6157
ENSG00000137171	-0.747974	2.79858e-13	2.42256e-12	KLC4	down	11.6157
ENSG00000134248	-0.557401	2.81805e-13	2.43797e-12	LAMTOR5	stable	11.613
ENSG00000113273	0.673812	2.8258e-13	2.44322e-12	ARSB	up	11.612
ENSG00000125931	-0.833188	2.93992e-13	2.54038e-12	CITED1	down	11.5951
ENSG00000178585	-0.454081	2.99647e-13	2.58772e-12	CTNNBIP1	stable	11.5871
ENSG00000110651	-0.295791	3.11296e-13	2.68673e-12	CD81	stable	11.5708
ENSG00000131876	0.534722	3.21715e-13	2.77501e-12	SNRPA1	stable	11.5567
ENSG00000067533	0.607075	3.2456e-13	2.79789e-12	RRP15	up	11.5532
ENSG00000148384	0.505286	3.25323e-13	2.80281e-12	INPP5E	stable	11.5524
ENSG00000087460	-0.241791	3.36838e-13	2.9003e-12	GNAS	stable	11.5376
ENSG00000107551	-0.473874	3.38614e-13	2.91216e-12	RASSF4	stable	11.5358
ENSG00000142303	-0.831582	3.38428e-13	2.91216e-12	ADAMTS10	down	11.5358
ENSG00000118705	0.271993	3.39063e-13	2.9143e-12	RPN2	stable	11.5355
ENSG00000152518	0.388844	3.42225e-13	2.93975e-12	ZFP36L2	stable	11.5317
ENSG00000143590	-1.19491	3.5268e-13	3.02778e-12	EFNA3	down	11.5189
ENSG00000184117	-0.355478	3.54543e-13	3.04198e-12	NIPSNAP1	stable	11.5168
ENSG00000130202	-0.360808	3.58758e-13	3.07634e-12	NECTIN2	stable	11.512
ENSG00000182742	0.44884	3.66475e-13	3.14066e-12	HOXB4	stable	11.503
ENSG00000132603	0.564387	3.668e-13	3.1416e-12	NIP7	stable	11.5028
ENSG00000072062	0.355694	3.82537e-13	3.27351e-12	PRKACA	stable	11.485
ENSG00000067955	0.433031	3.8265e-13	3.27351e-12	CBFB	stable	11.485
ENSG00000156030	0.512646	3.85556e-13	3.29644e-12	ELMSAN1	stable	11.482
ENSG00000173145	0.492904	3.85948e-13	3.29786e-12	NOC3L	stable	11.4818
ENSG00000116604	-0.558358	3.98204e-13	3.40059e-12	MEF2D	stable	11.4684
ENSG00000007372	-0.851265	4.00989e-13	3.42237e-12	PAX6	down	11.4657
ENSG00000198034	-0.33225	4.01945e-13	3.42852e-12	RPS4X	stable	11.4649
ENSG00000047644	0.431221	4.09577e-13	3.49157e-12	WWC3	stable	11.457
ENSG00000169499	-0.350055	4.15919e-13	3.54357e-12	PLEKHA2	stable	11.4506
ENSG00000114739	-0.68406	4.17922e-13	3.55856e-12	ACVR2B	down	11.4487
ENSG00000124571	0.375962	4.25633e-13	3.6221e-12	XPO5	stable	11.441
ENSG00000129484	0.440258	4.4781e-13	3.8086e-12	PARP2	stable	11.4192
ENSG00000124788	-0.577425	4.80895e-13	4.08761e-12	ATXN1	stable	11.3885
ENSG00000126458	-0.578745	4.87959e-13	4.14523e-12	RRAS	stable	11.3825
ENSG00000104112	-0.673731	4.99793e-13	4.2433e-12	SCG3	down	11.3723
ENSG00000130522	0.373466	5.02248e-13	4.26166e-12	JUND	stable	11.3704
ENSG00000132692	-0.994007	5.05156e-13	4.28384e-12	BCAN	down	11.3682
ENSG00000164742	0.561569	5.20474e-13	4.41118e-12	ADCY1	stable	11.3554
ENSG00000224877	0.577086	5.33618e-13	4.51995e-12	NDUFAF8	stable	11.3449
ENSG00000009335	0.327324	5.49e-13	4.64754e-12	UBE3C	stable	11.3328
ENSG00000102359	0.713413	5.62682e-13	4.7606e-12	SRPX2	up	11.3223
ENSG00000110811	0.325654	5.7451e-13	4.85786e-12	P3H3	stable	11.3136
ENSG00000189091	0.277926	5.75473e-13	4.86318e-12	SF3B3	stable	11.3131
ENSG00000169181	-0.910797	5.99277e-13	5.06141e-12	GSG1L	down	11.2957
ENSG00000188859	1.45349	6.14162e-13	5.18413e-12	FAM78B	up	11.2853
ENSG00000135439	-0.296035	6.57793e-13	5.5492e-12	AGAP2	stable	11.2558
ENSG00000089597	0.262984	6.76457e-13	5.70336e-12	GANAB	stable	11.2439
ENSG00000069667	-1.26055	6.81963e-13	5.74645e-12	RORA	down	11.2406
ENSG00000134001	0.36961	6.84163e-13	5.76166e-12	EIF2S1	stable	11.2395
ENSG00000135144	-0.949911	7.31845e-13	6.15966e-12	DTX1	down	11.2104
ENSG00000136810	0.51861	7.58202e-13	6.37782e-12	TXN	stable	11.1953
ENSG00000130517	0.364178	7.65965e-13	6.43941e-12	PGPEP1	stable	11.1912
ENSG00000124406	-1.33291	7.76425e-13	6.52358e-12	ATP8A1	down	11.1855
ENSG00000105401	0.290268	8.05314e-13	6.76241e-12	CDC37	stable	11.1699
ENSG00000243279	-0.636204	8.14055e-13	6.83188e-12	PRAF2	down	11.1655
ENSG00000169258	0.445682	8.22002e-13	6.89461e-12	GPRIN1	stable	11.1615
ENSG00000134809	0.570154	8.36342e-13	7.01086e-12	TIMM10	stable	11.1542
ENSG00000187954	-0.336557	8.39377e-13	7.03225e-12	CYHR1	stable	11.1529
ENSG00000185813	0.371372	8.40887e-13	7.04086e-12	PCYT2	stable	11.1524
ENSG00000173692	0.368011	8.52897e-13	7.13732e-12	PSMD1	stable	11.1465
ENSG00000048162	0.648724	8.70127e-13	7.27317e-12	NOP16	up	11.1383
ENSG00000184481	-1.353	8.69812e-13	7.27317e-12	FOXO4	down	11.1383
ENSG00000142002	0.380146	8.80093e-13	7.35226e-12	DPP9	stable	11.1336
ENSG00000100479	0.644975	8.81521e-13	7.35997e-12	POLE2	up	11.1331
ENSG00000113407	0.364797	8.94604e-13	7.46492e-12	TARS	stable	11.127
ENSG00000089169	-0.408055	9.21505e-13	7.68501e-12	RPH3A	stable	11.1144
ENSG00000147889	0.302871	9.40838e-13	7.84175e-12	CDKN2A	stable	11.1056
ENSG00000149554	0.419108	9.54995e-13	7.9552e-12	CHEK1	stable	11.0993
ENSG00000112312	0.471139	9.63472e-13	8.02123e-12	GMNN	stable	11.0958
ENSG00000117600	1.5779	9.743e-13	8.10675e-12	PLPPR4	up	11.0912
ENSG00000104290	-0.289684	9.89409e-13	8.22778e-12	FZD3	stable	11.0847
ENSG00000080815	-0.382638	9.92236e-13	8.24658e-12	PSEN1	stable	11.0837
ENSG00000105419	-0.362434	1.01992e-12	8.467e-12	MEIS3	stable	11.0723
ENSG00000170209	0.773503	1.01978e-12	8.467e-12	ANKK1	up	11.0723
ENSG00000181163	0.348121	1.02622e-12	8.51451e-12	NPM1	stable	11.0698
ENSG00000129235	0.574816	1.02889e-12	8.53177e-12	TXNDC17	stable	11.069
ENSG00000169169	-0.542657	1.09494e-12	9.07433e-12	CPT1C	stable	11.0422
ENSG00000123219	0.696041	1.13503e-12	9.40119e-12	CENPK	up	11.0268
ENSG00000141376	-1.02564	1.15206e-12	9.53682e-12	BCAS3	down	11.0206
ENSG00000138346	0.656362	1.20852e-12	9.99857e-12	DNA2	up	11.0001
ENSG00000135372	0.375971	1.21385e-12	1.0037e-11	NAT10	stable	10.9984
ENSG00000171703	-0.459021	1.22444e-12	1.01188e-11	TCEA2	stable	10.9949
ENSG00000145555	-0.384193	1.24113e-12	1.02509e-11	MYO10	stable	10.9892
ENSG00000165684	0.462581	1.2702e-12	1.04851e-11	SNAPC4	stable	10.9794
ENSG00000181027	0.513176	1.27455e-12	1.0515e-11	FKRP	stable	10.9782
ENSG00000080839	0.578895	1.30832e-12	1.07875e-11	RBL1	stable	10.9671
ENSG00000187091	-1.22292	1.31001e-12	1.07954e-11	PLCD1	down	10.9668
ENSG00000146909	0.467714	1.38497e-12	1.14067e-11	NOM1	stable	10.9428
ENSG00000004142	0.316384	1.43045e-12	1.17746e-11	POLDIP2	stable	10.9291
ENSG00000106153	0.285804	1.43518e-12	1.18069e-11	CHCHD2	stable	10.9279
ENSG00000175505	1.18093	1.46237e-12	1.20238e-11	CLCF1	up	10.92
ENSG00000142453	0.407788	1.53343e-12	1.26001e-11	CARM1	stable	10.8996
ENSG00000185630	-1.03751	1.5342e-12	1.26001e-11	PBX1	down	10.8996
ENSG00000073008	0.453272	1.53534e-12	1.26024e-11	PVR	stable	10.8995
ENSG00000142459	-0.428495	1.54761e-12	1.2696e-11	EVI5L	stable	10.8963
ENSG00000129932	0.466957	1.58427e-12	1.29895e-11	DOHH	stable	10.8864
ENSG00000186635	-0.408562	1.61639e-12	1.32453e-11	ARAP1	stable	10.8779
ENSG00000133316	0.477861	1.64165e-12	1.34447e-11	WDR74	stable	10.8714
ENSG00000182670	-0.269392	1.6443e-12	1.34495e-11	TTC3	stable	10.8713
ENSG00000173230	-0.425481	1.64356e-12	1.34495e-11	GOLGB1	stable	10.8713
ENSG00000198753	-0.602894	1.64499e-12	1.34495e-11	PLXNB3	down	10.8713
ENSG00000160447	0.41563	1.66998e-12	1.36461e-11	PKN3	stable	10.865
ENSG00000013523	-0.57205	1.67294e-12	1.36552e-11	ANGEL1	stable	10.8647
ENSG00000170049	0.627701	1.67296e-12	1.36552e-11	KCNAB3	up	10.8647
ENSG00000119185	0.45884	1.69016e-12	1.37878e-11	ITGB1BP1	stable	10.8605
ENSG00000079156	0.502085	1.7132e-12	1.3968e-11	OSBPL6	stable	10.8549
ENSG00000196369	-0.578944	1.74307e-12	1.42036e-11	SRGAP2B	stable	10.8476
ENSG00000204160	0.438676	1.80663e-12	1.47133e-11	ZDHHC18	stable	10.8323
ENSG00000071082	-0.33023	1.83383e-12	1.49264e-11	RPL31	stable	10.826
ENSG00000135148	-0.406809	1.83777e-12	1.49502e-11	TRAFD1	stable	10.8254
ENSG00000104490	-0.736742	1.87855e-12	1.52735e-11	NCALD	down	10.8161
ENSG00000198952	0.325266	1.94086e-12	1.57712e-11	SMG5	stable	10.8021
ENSG00000137414	-0.537696	1.98971e-12	1.61592e-11	FAM8A1	stable	10.7916
ENSG00000163235	1.02686	1.99623e-12	1.62032e-11	TGFA	up	10.7904
ENSG00000167011	-2.36373	2.02527e-12	1.64297e-11	NAT16	down	10.7844
ENSG00000171368	-1.00667	2.07611e-12	1.68328e-11	TPPP	down	10.7738
ENSG00000176485	-0.524525	2.11488e-12	1.71376e-11	PLA2G16	stable	10.7661
ENSG00000145494	0.560416	2.11989e-12	1.71687e-11	NDUFS6	stable	10.7653
ENSG00000167733	-0.81512	2.12128e-12	1.71704e-11	HSD11B1L	down	10.7652
ENSG00000130935	0.402188	2.12751e-12	1.72112e-11	NOL11	stable	10.7642
ENSG00000154096	-0.26578	2.14935e-12	1.73783e-11	THY1	stable	10.76
ENSG00000075711	0.457725	2.18434e-12	1.76514e-11	DLG1	stable	10.7532
ENSG00000275342	0.341761	2.1917e-12	1.77011e-11	PRAG1	stable	10.752
ENSG00000109107	-1.66178	2.19486e-12	1.77168e-11	ALDOC	down	10.7516
ENSG00000213760	-1.52283	2.27226e-12	1.83314e-11	ATP6V1G2	down	10.7368
ENSG00000135677	-0.316181	2.31224e-12	1.86436e-11	GNS	stable	10.7295
ENSG00000111540	-0.341622	2.33032e-12	1.8779e-11	RAB5B	stable	10.7263
ENSG00000151849	0.597465	2.38942e-12	1.92447e-11	CENPJ	up	10.7157
ENSG00000115091	0.3296	2.40457e-12	1.9356e-11	ACTR3	stable	10.7132
ENSG00000070950	0.584203	2.40955e-12	1.93854e-11	RAD18	stable	10.7125
ENSG00000144746	-0.406668	2.45674e-12	1.97542e-11	ARL6IP5	stable	10.7043
ENSG00000214595	0.930631	2.49374e-12	2.00406e-11	EML6	up	10.6981
ENSG00000117500	0.389482	2.60495e-12	2.09228e-11	TMED5	stable	10.6794
ENSG00000169592	0.424015	2.61366e-12	2.09812e-11	INO80E	stable	10.6782
ENSG00000148700	-0.604702	2.62159e-12	2.10332e-11	ADD3	down	10.6771
ENSG00000140983	0.349923	2.64445e-12	2.11934e-11	RHOT2	stable	10.6738
ENSG00000013441	-0.506942	2.6442e-12	2.11934e-11	CLK1	stable	10.6738
ENSG00000108306	-0.880775	2.65482e-12	2.12648e-11	FBXL20	down	10.6723
ENSG00000018189	-0.506884	2.7055e-12	2.16589e-11	RUFY3	stable	10.6644
ENSG00000167088	0.405005	2.77243e-12	2.21825e-11	SNRPD1	stable	10.654
ENSG00000068654	0.436301	2.78399e-12	2.22628e-11	POLR1A	stable	10.6524
ENSG00000065978	0.23781	2.84817e-12	2.27635e-11	YBX1	stable	10.6428
ENSG00000145703	0.404105	2.86433e-12	2.28802e-11	IQGAP2	stable	10.6405
ENSG00000100413	0.379794	2.86651e-12	2.2885e-11	POLR3H	stable	10.6404
ENSG00000106665	-0.367942	2.89702e-12	2.31159e-11	CLIP2	stable	10.6361
ENSG00000166451	0.581702	2.91085e-12	2.32136e-11	CENPN	stable	10.6343
ENSG00000183527	0.634192	2.92536e-12	2.33165e-11	PSMG1	up	10.6323
ENSG00000180287	1.78025	2.96065e-12	2.3585e-11	PLD5	up	10.6274
ENSG00000166272	-0.512335	3.0021e-12	2.39021e-11	WBP1L	stable	10.6216
ENSG00000173846	0.490779	3.01098e-12	2.39597e-11	PLK3	stable	10.6205
ENSG00000156011	-0.368517	3.0483e-12	2.42435e-11	PSD3	stable	10.6154
ENSG00000158290	-0.407125	3.07391e-12	2.44339e-11	CUL4B	stable	10.612
ENSG00000196975	-0.747614	3.1525e-12	2.50448e-11	ANXA4	down	10.6013
ENSG00000101745	-0.485519	3.17814e-12	2.52348e-11	ANKRD12	stable	10.598
ENSG00000103194	0.356721	3.19057e-12	2.53198e-11	USP10	stable	10.5965
ENSG00000165704	0.54202	3.28198e-12	2.6031e-11	HPRT1	stable	10.5845
ENSG00000144354	0.40317	3.28746e-12	2.60602e-11	CDCA7	stable	10.584
ENSG00000123815	-0.372277	3.2959e-12	2.6113e-11	COQ8B	stable	10.5831
ENSG00000086712	0.463605	3.32437e-12	2.63242e-11	TXLNG	stable	10.5796
ENSG00000162769	0.465629	3.33758e-12	2.64145e-11	FLVCR1	stable	10.5782
ENSG00000158296	-1.59626	3.37955e-12	2.67321e-11	SLC13A3	down	10.573
ENSG00000142065	-0.837759	3.42981e-12	2.7115e-11	ZFP14	down	10.5668
ENSG00000164111	0.312253	3.44823e-12	2.72459e-11	ANXA5	stable	10.5647
ENSG00000142235	-1.17857	3.59872e-12	2.84196e-11	LMTK3	down	10.5464
ENSG00000118655	0.653809	3.72393e-12	2.93924e-11	DCLRE1B	up	10.5318
ENSG00000112787	0.397809	3.75896e-12	2.96529e-11	FBRSL1	stable	10.5279
ENSG00000182621	-0.535696	3.82342e-12	3.01288e-11	PLCB1	stable	10.521
ENSG00000139636	-0.575139	3.82219e-12	3.01288e-11	LMBR1L	stable	10.521
ENSG00000145391	0.370397	3.82768e-12	3.01461e-11	SETD7	stable	10.5208
ENSG00000102901	0.430129	3.8382e-12	3.02126e-11	CENPT	stable	10.5198
ENSG00000183520	0.455979	3.8921e-12	3.06204e-11	UTP11	stable	10.514
ENSG00000177189	0.468587	3.92141e-12	3.08343e-11	RPS6KA3	stable	10.511
ENSG00000103241	0.644652	3.95244e-12	3.10616e-11	FOXF1	up	10.5078
ENSG00000104687	0.349983	4.06757e-12	3.19492e-11	GSR	stable	10.4955
ENSG00000106305	0.418319	4.15638e-12	3.26263e-11	AIMP2	stable	10.4864
ENSG00000134376	-1.5149	4.15826e-12	3.26263e-11	CRB1	down	10.4864
ENSG00000072195	-0.53013	4.38472e-12	3.43847e-11	SPEG	stable	10.4636
ENSG00000128016	-0.636868	4.59339e-12	3.60017e-11	ZFP36	down	10.4437
ENSG00000166441	-0.306344	4.6875e-12	3.67196e-11	RPL27A	stable	10.4351
ENSG00000204580	-0.274626	4.69381e-12	3.67492e-11	DDR1	stable	10.4348
ENSG00000111801	-0.828352	4.82829e-12	3.77819e-11	BTN3A3	down	10.4227
ENSG00000122756	-0.502821	4.92144e-12	3.84902e-11	CNTFR	stable	10.4147
ENSG00000106003	-0.418124	4.94978e-12	3.8691e-11	LFNG	stable	10.4124
ENSG00000173546	-0.374388	5.0155e-12	3.91838e-11	CSPG4	stable	10.4069
ENSG00000170382	-0.546792	5.02203e-12	3.92137e-11	LRRN2	stable	10.4066
ENSG00000084710	0.509976	5.18038e-12	4.04286e-11	EFR3B	stable	10.3933
ENSG00000084073	0.376902	5.20011e-12	4.05609e-11	ZMPSTE24	stable	10.3919
ENSG00000206418	0.468585	5.23255e-12	4.07921e-11	RAB12	stable	10.3894
ENSG00000186432	0.354234	5.30696e-12	4.135e-11	KPNA4	stable	10.3835
ENSG00000176087	0.348699	5.43217e-12	4.2303e-11	SLC35A4	stable	10.3736
ENSG00000132718	-0.291463	5.55853e-12	4.3264e-11	SYT11	stable	10.3639
ENSG00000132768	0.455456	5.56419e-12	4.32849e-11	DPH2	stable	10.3637
ENSG00000271503	-3.78928	5.62517e-12	4.3736e-11	CCL5	down	10.3592
ENSG00000100196	-0.488116	5.77621e-12	4.48864e-11	KDELR3	stable	10.3479
ENSG00000176953	0.436015	5.8346e-12	4.52919e-11	NFATC2IP	stable	10.344
ENSG00000159208	-0.863477	5.83188e-12	4.52919e-11	CIART	down	10.344
ENSG00000079819	0.337293	5.9317e-12	4.60211e-11	EPB41L2	stable	10.337
ENSG00000084092	-0.51317	5.96039e-12	4.62191e-11	NOA1	stable	10.3352
ENSG00000006118	0.270129	6.01654e-12	4.66298e-11	TMEM132A	stable	10.3313
ENSG00000187535	-0.592161	6.07446e-12	4.70537e-11	IFT140	down	10.3274
ENSG00000087245	0.315236	6.17948e-12	4.78418e-11	MMP2	stable	10.3202
ENSG00000102934	-0.659333	6.18535e-12	4.78618e-11	PLLP	down	10.32
ENSG00000163702	-0.610433	6.20377e-12	4.79789e-11	IL17RC	down	10.319
ENSG00000158805	0.488362	6.369e-12	4.92307e-11	ZNF276	stable	10.3078
ENSG00000142279	0.784156	6.43432e-12	4.97092e-11	WTIP	up	10.3036
ENSG00000198824	0.473604	6.78645e-12	5.24018e-11	CHAMP1	stable	10.2807
ENSG00000130066	-0.904098	7.07983e-12	5.46383e-11	SAT1	down	10.2625
ENSG00000120948	0.352076	7.25557e-12	5.5965e-11	TARDBP	stable	10.2521
ENSG00000111275	-0.633659	7.36214e-12	5.6757e-11	ALDH2	down	10.246
ENSG00000063244	0.277807	7.3839e-12	5.68946e-11	U2AF2	stable	10.2449
ENSG00000176771	-1.73191	7.44897e-12	5.73657e-11	NCKAP5	down	10.2413
ENSG00000165724	0.423539	7.51835e-12	5.78694e-11	ZMYND19	stable	10.2376
ENSG00000166401	0.939369	7.57894e-12	5.83051e-11	SERPINB8	up	10.2343
ENSG00000184381	-0.522653	7.71087e-12	5.92575e-11	PLA2G6	stable	10.2273
ENSG00000156171	-0.657204	7.70828e-12	5.92575e-11	DRAM2	down	10.2273
ENSG00000110492	-0.311036	7.91896e-12	6.08247e-11	MDK	stable	10.2159
ENSG00000072786	0.535919	8.15781e-12	6.26262e-11	STK10	stable	10.2032
ENSG00000179104	-0.960024	8.51996e-12	6.5372e-11	TMTC2	down	10.1846
ENSG00000141699	-0.486421	8.69842e-12	6.67062e-11	RETREG3	stable	10.1758
ENSG00000011485	0.318062	8.73816e-12	6.69757e-11	PPP5C	stable	10.1741
ENSG00000105245	-0.349641	8.88256e-12	6.80468e-11	NUMBL	stable	10.1672
ENSG00000035141	0.38245	9.19896e-12	7.04336e-11	FAM136A	stable	10.1522
ENSG00000164109	0.462134	9.30996e-12	7.12461e-11	MAD2L1	stable	10.1472
ENSG00000123485	0.380408	9.3822e-12	7.17613e-11	HJURP	stable	10.1441
ENSG00000184220	0.569438	9.79301e-12	7.48642e-11	CMSS1	stable	10.1257
ENSG00000067057	0.323751	9.87642e-12	7.54623e-11	PFKP	stable	10.1223
ENSG00000111144	-0.397684	1.00894e-11	7.70491e-11	LTA4H	stable	10.1132
ENSG00000214530	-0.630145	1.02257e-11	7.80492e-11	STARD10	down	10.1076
ENSG00000085872	0.368383	1.04696e-11	7.98691e-11	CHERP	stable	10.0976
ENSG00000173110	-1.10546	1.05433e-11	8.03894e-11	HSPA6	down	10.0948
ENSG00000197093	-0.628408	1.05621e-11	8.04901e-11	GAL3ST4	down	10.0943
ENSG00000155438	0.441546	1.0716e-11	8.16205e-11	NIFK	stable	10.0882
ENSG00000146223	0.325307	1.13233e-11	8.62016e-11	RPL7L1	stable	10.0645
ENSG00000122406	-0.284437	1.17859e-11	8.96761e-11	RPL5	stable	10.0473
ENSG00000154920	0.597187	1.22693e-11	9.33055e-11	EME1	up	10.0301
ENSG00000213551	0.451029	1.25161e-11	9.51326e-11	DNAJC9	stable	10.0217
ENSG00000184162	0.596426	1.26209e-11	9.58795e-11	NR2C2AP	up	10.0183
ENSG00000204308	-0.48306	1.26654e-11	9.61676e-11	RNF5	stable	10.017
ENSG00000145425	-0.329348	1.27467e-11	9.67342e-11	RPS3A	stable	10.0144
ENSG00000106689	0.504452	1.27719e-11	9.68755e-11	LHX2	stable	10.0138
ENSG00000161036	0.347645	1.27852e-11	9.69256e-11	LRWD1	stable	10.0136
ENSG00000100242	-0.398938	1.29832e-11	9.83756e-11	SUN2	stable	10.0071
ENSG00000172725	-0.307426	1.31691e-11	9.97321e-11	CORO1B	stable	10.0012
ENSG00000133265	0.379076	1.33091e-11	1.0074e-10	HSPBP1	stable	9.9968
ENSG00000114942	0.374609	1.34638e-11	1.01858e-10	EEF1B2	stable	9.992
ENSG00000109576	0.676017	1.35512e-11	1.02467e-10	AADAT	up	9.98942
ENSG00000075131	0.693831	1.36338e-11	1.03038e-10	TIPIN	up	9.987
ENSG00000058262	0.252131	1.39858e-11	1.05643e-10	SEC61A1	stable	9.97616
ENSG00000170899	-0.630073	1.40367e-11	1.05973e-10	GSTA4	down	9.9748
ENSG00000276045	-0.365442	1.42091e-11	1.07219e-10	ORAI1	stable	9.96973
ENSG00000136425	-0.527122	1.45028e-11	1.09378e-10	CIB2	stable	9.96107
ENSG00000165071	0.754706	1.45843e-11	1.09936e-10	TMEM71	up	9.95886
ENSG00000146731	0.272387	1.46023e-11	1.10015e-10	CCT6A	stable	9.95855
ENSG00000140157	0.381225	1.46528e-11	1.10339e-10	NIPA2	stable	9.95727
ENSG00000169925	-0.443198	1.50731e-11	1.13445e-10	BRD3	stable	9.94521
ENSG00000117174	0.549008	1.53049e-11	1.1513e-10	ZNHIT6	stable	9.93881
ENSG00000151376	1.0998	1.53846e-11	1.1567e-10	ME3	up	9.93678
ENSG00000071564	0.241101	1.55291e-11	1.16638e-10	TCF3	stable	9.93316
ENSG00000125247	-0.782531	1.55293e-11	1.16638e-10	TMTC4	down	9.93316
ENSG00000145476	-0.507208	1.55446e-11	1.16693e-10	CYP4V2	stable	9.93296
ENSG00000186871	0.680061	1.5767e-11	1.18301e-10	ERCC6L	up	9.92701
ENSG00000113361	-0.305437	1.62539e-11	1.21892e-10	CDH6	stable	9.91402
ENSG00000006756	-0.758982	1.64488e-11	1.2329e-10	ARSD	down	9.90907
ENSG00000176102	0.395643	1.6463e-11	1.23333e-10	CSTF3	stable	9.90892
ENSG00000099330	-0.852211	1.65373e-11	1.23826e-10	OCEL1	down	9.90719
ENSG00000122545	-0.308578	1.6565e-11	1.2397e-10	2024-09-07	stable	9.90668
ENSG00000197905	0.521693	1.66375e-11	1.24449e-10	TEAD4	stable	9.90501
ENSG00000162073	0.465213	1.67179e-11	1.24986e-10	PAQR4	stable	9.90314
ENSG00000082684	-0.815222	1.6909e-11	1.26349e-10	SEMA5B	down	9.89843
ENSG00000179454	-0.633748	1.72307e-11	1.28688e-10	KLHL28	down	9.89046
ENSG00000153207	0.363378	1.73553e-11	1.29552e-10	AHCTF1	stable	9.88756
ENSG00000174437	0.260825	1.77017e-11	1.3207e-10	ATP2A2	stable	9.8792
ENSG00000134698	-0.610264	1.78683e-11	1.33245e-10	AGO4	down	9.87535
ENSG00000166387	-0.527596	1.80024e-11	1.34176e-10	PPFIBP2	stable	9.87232
ENSG00000277075	-2.04741	1.8421e-11	1.37226e-10	HIST1H2AE	down	9.86256
ENSG00000159377	0.311237	1.86122e-11	1.38579e-10	PSMB4	stable	9.8583
ENSG00000105429	-0.434071	1.8735e-11	1.39423e-10	MEGF8	stable	9.85567
ENSG00000143643	0.540529	1.87899e-11	1.3976e-10	TTC13	stable	9.85462
ENSG00000155755	0.58445	1.92246e-11	1.4292e-10	TMEM237	stable	9.84491
ENSG00000176595	-0.51725	1.927e-11	1.43185e-10	KBTBD11	stable	9.8441
ENSG00000109654	-0.400031	1.96825e-11	1.46101e-10	TRIM2	stable	9.83535
ENSG00000174514	-2.08807	1.96787e-11	1.46101e-10	MFSD4A	down	9.83535
ENSG00000006282	-0.370189	2.01941e-11	1.49823e-10	SPATA20	stable	9.82442
ENSG00000262814	0.559167	2.09432e-11	1.55302e-10	MRPL12	stable	9.80882
ENSG00000123130	0.573888	2.18071e-11	1.61625e-10	ACOT9	stable	9.79149
ENSG00000172757	0.306651	2.2056e-11	1.63387e-10	CFL1	stable	9.78678
ENSG00000090020	0.421692	2.21001e-11	1.63631e-10	SLC9A1	stable	9.78614
ENSG00000180190	-0.878324	2.21979e-11	1.64272e-10	TDRP	down	9.78444
ENSG00000242265	0.384879	2.24676e-11	1.66183e-10	PEG10	stable	9.77941
ENSG00000186283	0.491983	2.25308e-11	1.66566e-10	TOR3A	stable	9.77841
ENSG00000117020	-0.451023	2.25619e-11	1.66711e-10	AKT3	stable	9.77804
ENSG00000148362	0.388466	2.25864e-11	1.66808e-10	PAXX	stable	9.77778
ENSG00000256269	0.4218	2.26985e-11	1.67551e-10	HMBS	stable	9.77585
ENSG00000165424	-0.606406	2.28005e-11	1.68218e-10	ZCCHC24	down	9.77413
ENSG00000105048	-1.70519	2.29601e-11	1.69311e-10	TNNT1	down	9.77132
ENSG00000132199	1.02897	2.31902e-11	1.70921e-10	ENOSF1	up	9.76721
ENSG00000156931	-0.537858	2.34423e-11	1.72692e-10	VPS8	stable	9.76273
ENSG00000221890	-0.457462	2.38851e-11	1.75865e-10	NPTXR	stable	9.75482
ENSG00000007376	0.373211	2.42338e-11	1.78343e-10	RPUSD1	stable	9.74875
ENSG00000149273	-0.303456	2.48114e-11	1.82501e-10	RPS3	stable	9.73873
ENSG00000185753	-0.590683	2.48642e-11	1.82797e-10	CXorf38	down	9.73803
ENSG00000092054	-0.765044	2.49297e-11	1.83187e-10	MYH7	down	9.73711
ENSG00000179981	-0.498052	2.60847e-11	1.91577e-10	TSHZ1	stable	9.71766
ENSG00000205356	-0.431065	2.62814e-11	1.92924e-10	TECPR1	stable	9.71461
ENSG00000148824	0.942515	2.66896e-11	1.95822e-10	MTG1	up	9.70814
ENSG00000162244	-0.323073	2.69216e-11	1.97425e-10	RPL29	stable	9.7046
ENSG00000108384	0.511375	2.75044e-11	2.01598e-10	RAD51C	stable	9.69551
ENSG00000154277	0.364414	2.79605e-11	2.04838e-10	UCHL1	stable	9.68859
ENSG00000102384	0.633978	2.82733e-11	2.07025e-10	CENPI	up	9.68398
ENSG00000128708	0.400204	2.83287e-11	2.07327e-10	HAT1	stable	9.68334
ENSG00000141854	-0.863736	2.936e-11	2.14767e-10	MISP3	down	9.66803
ENSG00000103995	0.62022	2.97924e-11	2.17821e-10	CEP152	up	9.6619
ENSG00000115468	-0.625527	2.98908e-11	2.1843e-10	EFHD1	down	9.66069
ENSG00000005022	0.296739	3.01933e-11	2.2043e-10	SLC25A5	stable	9.65673
ENSG00000174705	0.394791	3.01947e-11	2.2043e-10	SH3PXD2B	stable	9.65673
[truncated: 12,589 more rows]

## Sheet: radio_stiff_vs_soft_Up_GO
	ONTOLOGY	ID	Description	GeneRatio	BgRatio	pvalue	p.adjust	qvalue	geneID	Count	log10P
GO:0006261	BP	GO:0006261	DNA-templated DNA replication	0.0680556	169/21069	6.46e-32	3.18e-28	2.77e-28	TONSL/RECQL4/DDX11/MCM8/CHTF18/CDC6/MCM7/ALYREF/CDC45/GINS4/DDX21/FEN1/MCM4/POLE/CDT1/MCM10/GINS1/BAZ1A/E2F7/CDK2/RBBP8/POLD3/CENPX/POLA1/CDK2AP1/LIG1/E2F8/ORC6/TICRR/RFC5/BLM/ORC1/GINS2/POLA2/MMS22L/DONSON/POLQ/FBXO5/ATAD5/POLE2/DNA2/EME1/TIPIN/DSCC1/GINS3/CCNE2/MCIDAS/RTEL1/CENPS	49	27.4972
GO:0006260	BP	GO:0006260	DNA replication	0.0819444	308/21069	1.41e-27	3.46e-24	3.02e-24	TONSL/RECQL4/DDX11/RRM2/MCM8/CHTF18/CHAF1A/CDC6/MCM7/ALYREF/CDC45/GINS4/DDX21/LPIN1/FEN1/MCM4/POLE/CDT1/GRWD1/MCM10/GINS1/ESCO2/BAZ1A/E2F7/CDK2/RBBP8/POLD3/CENPX/DTL/PCLAF/POLA1/CDK2AP1/LIG1/E2F8/UCHL5/CHAF1B/ORC6/TICRR/RFC5/BLM/ORC1/GINS2/POLA2/MMS22L/DONSON/POLQ/FBXO5/FAM111B/ATAD5/POLE2/DNA2/EME1/TIPIN/DSCC1/GINS3/CCNE2/MCIDAS/RTEL1/CENPS	59	23.4603
GO:0016072	BP	GO:0016072	rRNA metabolic process	0.0583333	292/21069	2.95e-15	4.84e-12	4.21e-12	CAVIN1/DDX11/NOP56/NCL/POLR1E/PRKDC/EBNA1BP2/NOLC1/WDR43/DKC1/BOP1/MRTO4/DDX21/PA2G4/UTP20/RRP1/BUD23/MDN1/DHX37/RRP12/RRP1B/TCOF1/EMG1/KRI1/URB1/NOP58/LYAR/NOL6/RRP9/NOL10/DDX51/EXOSC8/RRS1/RRP15/MRM1/RCL1/LOC102724159/UTP15/POLR1G/PPAN/NOP2/DDX47	42	11.3152
GO:0042254	BP	GO:0042254	ribosome biogenesis	0.0625	338/21069	5.5e-15	6.77e-12	5.89e-12	NOP56/GPATCH4/PRKDC/EBNA1BP2/NOLC1/WDR43/DKC1/BOP1/MRTO4/DDX21/ABCE1/PA2G4/MYBBP1A/UTP20/RRP1/BUD23/GRWD1/MDN1/DHX37/RRP12/RRP1B/AATF/EMG1/KRI1/URB1/NOP58/LYAR/NOL6/METTL17/RRP9/NOL10/DDX51/EXOSC8/RRS1/PAK1IP1/RRP15/NOP16/MRM1/RCL1/LOC102724159/LTV1/UTP15/PPAN/NOP2/DDX47	45	11.1695
GO:0044786	BP	GO:0044786	cell cycle DNA replication	0.0236111	42/21069	1.12e-14	1.11e-11	9.65e-12	CDC45/FEN1/MCM4/CDT1/GINS1/E2F7/POLA1/LIG1/E2F8/BLM/DONSON/FBXO5/ATAD5/DNA2/TIPIN/GINS3/RTEL1	17	10.9554
GO:0000075	BP	GO:0000075	cell cycle checkpoint signaling	0.0430556	217/21069	1.59e-11	6.01e-09	5.23e-09	CCND1/DOT1L/CDC6/ZWINT/PRKDC/CDC45/TRIP13/CLSPN/AURKB/NSUN2/CDT1/PIDD1/CDK2/RBBP8/DTL/CASP2/FANCD2/TICRR/BLM/ORC1/WDR76/BRIP1/DONSON/SPC24/DNA2/EME1/TIPIN/SPC25/HASPIN/NABP1/TEX14	31	8.2211
GO:0006302	BP	GO:0006302	double-strand break repair	0.0472222	315/21069	3.52e-09	7.23e-07	6.29e-07	TONSL/RECQL4/DDX11/CDCA5/SMC5/MCM8/MCM7/RAD54L/PRKDC/HMGA2/CDC45/TRIP13/GINS4/FEN1/MCM4/ESCO2/RBBP8/FOXM1/FANCD2/POLA1/BLM/CGAS/GINS2/XRCC2/MMS22L/BRIP1/POLQ/DNA2/DCLRE1B/EME1/AUNIP/NABP1/FANCB/RTEL1	34	6.14102
GO:0007160	BP	GO:0007160	cell-matrix adhesion	0.0416667	273/21069	1.95e-08	3.21e-06	2.79e-06	SERPINE1/THBS1/CD44/ITGA7/ADAM9/AJUBA/NF2/VCL/ZYX/ITGB8/CD63/ACTN1/ADAMTS9/CORO1C/CLASP1/COL5A3/DLC1/MACF1/ITGA2/ARHGAP6/CD34/THSD1/PLAU/EFNA5/FBLN5/CCN2/ITGA1/ACER2/EPHA1/PHLDB2	30	5.49403
GO:0042770	BP	GO:0042770	signal transduction in response to DNA damage	0.0347222	212/21069	7.51e-08	1.04e-05	9.03e-06	CD44/CCND1/GADD45A/DOT1L/PRKDC/CLSPN/PIDD1/SESN2/E2F7/CDK2/FOXM1/DTL/CASP2/FANCD2/TICRR/BLM/WDR76/BRIP1/DONSON/ATAD5/EME1/TIPIN/ACER2/PMAIP1/ANKRD1	25	4.98401
GO:0000724	BP	GO:0000724	double-strand break repair via homologous recombination	0.0291667	177/21069	7.41e-07	7.77e-05	6.76e-05	TONSL/RECQL4/SMC5/MCM8/MCM7/RAD54L/CDC45/GINS4/FEN1/MCM4/RBBP8/BLM/CGAS/GINS2/XRCC2/MMS22L/POLQ/AUNIP/NABP1/FANCB/RTEL1	21	4.10967
