# Supplementary material
Source: Research Square preprint supplement (doi:10.21203/rs.3.rs-6009404/v1)
Supplement: Supplementary file 11 [file c9ffea5d7dc3090bc8d5b80a.xlsx]

## Sheet: Sheet1
Relative concentrations of acrylamide and bis-acrylamide, along with their corresponding Young’s moduli, for homogeneous hydrogels with a constant modulus.
Acrylamide%	Bis-acrylamide%	Acrylamide from 40% stock solution (ml)	Bis-acrylamide from 2% stock solution (ml)	PBS (ml)	E±St.Dev. (kPa)
3	0.06	0.75	0.3	8.95	0.48±0.16
3	0.1	0.75	0.5	8.75	1.10±0.34
5	0.15	1.25	0.75	8	4.47±1.19
10	0.1	2.5	0.5	7	10.61
