# Supplementary material
Source: Research Square preprint supplement (doi:10.21203/rs.3.rs-6009404/v1)
Supplement: Supplementary file 12 [file cb7080b597ee905564745569.xlsx]

## Sheet: Sheet1
Fig.2c (123 genes)
SPL1
E2F8
RGMB
NUP155
PLAU
ANXA1
COL22A1
KIRREL1
NOS2
KCNF1
ITGA3
GINS1
LMNB2
DCBLD2
FOXM1
EZH2
STEAP3
TUBB
KIF11
ATP13A3
NUP153
KIF18B
ASF1B
LIF
CDC6
WDR62
CENPU
MYBL2
CIP2A
EMP1
AURKB
CD151
FANCA
TRAM2
METTL7B
NCAPG2
RCAN1
ABCE1
LRR1
ADAM9
C6orf141
FBXO5
NT5E
PRKDC
TYMS
MELK
PODXL
ITGB8
TXNDC5
SLC4A7
ZWINT
PAK1IP1
S100A16
RCC1
TNFRSF12A
SKA1
TRIP13
DOT1L
CDCA5
KIF23
SKA3
NCAPH
IQGAP3
PDPN
TK1
LUM
PFAS
TNC
IGF2BP2
SACS
INSM1
HS3ST3B1
PCLAF
LAMB1
GADD45A
SCG2
SRPX2
CSMD2
CEP55
CEMIP
NTN1
RRM2
DDIAS
ARHGAP29
HNRNPAB
EFNB2
F2R
TUBA1C
HELLS
CDC45
NT5DC2
ETS1
SPC25
MCM2
MCM4
LRRC59
GNG11
BUB1B
ODC1
RAD51AP1
MKI67
NRCAM
EXO1
AJUBA
CENPK
CHRNA9
IGFBP3
CNIH3
ERRFI1
UHRF1
FAM111B
HMGA1
B3GALT1
NCAPG
FLNA
VAV3
ARSJ
CENPM
SPC24
FANCD2
SPOCD1
MMP9
CDCA8
