# Supplementary material
Source: Research Square preprint supplement (doi:10.21203/rs.3.rs-6009404/v1)
Supplement: Supplementary file 13 [file e8b2831af63dc3c1fe720cbe.xlsx]

## Sheet: Primer
DNA PullDown Primers
Genes	Primer sequences
Region-1-F	/5Biosg/GAACCTTTCTGCCCCACCCATCCTTCCAG
Region-1-R	/5Biosg/GGACTGCTCAGTGGGACGGGAATCCTCAGC
Region-2-F	/5Biosg/CAGGCTTCACGCCCGACACACGCCCCAATC
Region-2-R	/5Biosg/GGCCCACAAGTTAGCCGGACTCGGGAACAC
ChIP-qPCR Primers
Genes	Primer sequences
IQGAP3-F	CGAGACCCTTCTCTGACCCT
IQGAP3-R	CAGGATTCTCAGCGGTGTGG
CDK1-F	GAAATTGAGCGGAGAGCGAC
CDK1-R	CCGTTCCTCAATACTCGCCC
CDK2-F	GAGCGAGAGGTATACTGCGTT
CDK2-R	GTACGTGCCCTCTCCGATCT
BCL2-F	CCCGGTTATCGTACCCTGTT
BCL2-R	CACCCCCTCGTCCAAGAATG
CCND1-F	ATGCCAACCTCCTCAACGAC
CCND1-R	CTTAAGAGAGCCGCCCGAAG
qPCR Primers
Genes	Primer sequences
YAP1-F	TAGCCCTGCGTAGCCAGTTA
YAP-R	TCATGCTTAGTCCACTGTCTGT
TEAD1-R	TCCCACATGGTGGATAGATAGC
TEAD1-F	ATGGAAAGGATGAGTGACTCTGC
IQGAP3-F	GCAGCCTATGAACGCCTCA
IQGAP3-R	GGAGGGTGCAAAACAGTGG
WDR62-F	GCCTTCTCACCCAATATGAAGC
WDR62-R	GCCACTACGATGTCTTTCTTCC
NCAPG2-F	TACAAGCCGTGTCTAAGGAGC
NCAPG2-R	TTGAGCCATGTTCGGTTTCCA
BCL2-F	GGTGGGGTCATGTGTGTGG
BCL2-R	CGGTTCAGGTACTCAGTCATCC
CDK2-F	CCAGGAGTTACTTCTATGCCTGA
CDK2-R	TTCATCCAGGGGAGGTACAAC
CDK1-F	AAACTACAGGTCAAGTGGTAGCC
CDK1-R	TCCTGCATAAGCACATCCTGA
ACTB-F	CATGTACGTTGCTATCCAGGC
ACTB-R	CTCCTTAATGTCACGCACGAT
CCND1-F	GCTGCGAAGTGGAAACCATC
CCND1-R	CCTCCTTCTGCACACATTTGAA
Piezo1-F	GGACTCTCGCTGGTCTACCT
Piezo1-R	GGGCACAATATGCAGGCAGA

## Sheet: Antibody
Flow antibody
Company	Cat#	Name	Dilution
Biolegend	400151	Pacific Blue™ Mouse IgG1, κ Isotype Ctrl Antibody	1:200
Biolegend	656111	Pacific Blue™ anti-SOX2 Antibody	1:200
biolegend	306204	FITC anti-human CD147 Antibody	1:200
biolegend	400107	FITC Mouse IgG1, κ Isotype Ctrl Antibody	1:200
BD Biosciences	566594	PE Mouse Anti-Human CD133	1:100
BD Biosciences	559320	PE Mouse IgG1, κ Isotype Control	1:100
Novus Biologicals	NBP1-78446SS	PIEZO1 Antibody	1:100
Thermo Fisher Scientific	A-21206	Donkey anti-Rabbit IgG (H+L) Highly Cross-Adsorbed Secondary Antibody, Alexa Fluor™ 488	1:200
Thermo Fisher Scientific	65-0850-84	eBioscience™ CFSE	Living cell staining
IF and IHC antibody
Company	Cat#	Name	Dilution
Thermo Fisher Scientific	MA1-014	SOX2 Monoclonal Antibody (20G5)	1:200
R&D Systems	AF2018-SP	Human/Mouse/Rat SOX2 Antibody	10 µg/mL
Novus Biologicals	NBP3-12897	FAK [p Tyr397] Antibody	1:200
Cell Signaling Technology	3671T	Phospho-Myosin Light Chain 2 (Ser19)	1:50
Thermo Fisher Scientific	MA5-32876	PIEZO1 Monoclonal Antibody	1:100
Santa Cruz Biotechnology	sc-393451	IQGAP3 Antibody	1:40
Proteintech	25930-1-AP	IQGAP3 Polyclonal antibody	IHC (1:50)
Cell Signaling Technology	12292T	TEAD1 (D9X2L) Rabbit mAb	1:100
Santa Cruz Biotechnology	sc-376830	YAP Antibody	1:50
Cell Signaling Technology	80788T	GFAP (E4L7M) XP® Rabbit mAb	1:200
Cell Signaling Technology	65653T	RAD51	1:100
Abcam	ab238020	Anti-Ki67 antibody	2 µg/mL
Cell Signaling Technology	9718S	Phospho-Histone H2A.X (Ser139) (20E3) Rabbit mAb	1:200
Thermo Fisher Scientific	A-21202	Donkey anti-Mouse IgG (H+L) Highly Cross-Adsorbed Secondary Antibody, Alexa Fluor™ 488	1:200
Thermo Fisher Scientific	A-21206	Donkey anti-Rabbit IgG (H+L) Highly Cross-Adsorbed Secondary Antibody, Alexa Fluor 488	1:200
Thermo Fisher Scientific	A10037	Donkey anti-Mouse IgG (H+L) Highly Cross-Adsorbed Secondary Antibody, Alexa Fluo 568	1:200
Thermo Fisher Scientific	A10042	Donkey anti-Rabbit IgG (H+L) Highly Cross-Adsorbed Secondary Antibody, Alexa Fluor 568	1:200
Thermo Fisher Scientific	A-11057	Donkey anti-Goat IgG (H+L) Cross-Adsorbed Secondary Antibody, Alexa Fluor 568	1:200
Thermo Fisher Scientific	A-31571	Donkey anti-Mouse IgG (H+L) Highly Cross-Adsorbed Secondary Antibody, Alexa Fluor 647	1:200
WB and IP antibody
Company	Cat#	Name	Dilution
Proteintech	11064-1-AP	SOX2 Polyclonal antibody	1:1000
Thermo Fisher Scientific	MA1-014	SOX2 Monoclonal Antibody (20G5)	WB(1：1000)/IP(5 µg)
Proteintech	13999-1-AP	OLIG2 Polyclonal antibody	1:1000
Cell Signaling Technology	#80788T	GFAP (E4L7M) XP® Rabbit mAb	1:1000
Proteintech	15939-1-AP	Piezo1 (extracellular domain) Polyclonal antibody	1:1000
Thermo Fisher Scientific	MA5-32876	PIEZO1 Monoclonal Antibody	1:1000
Proteintech	66258-1-Ig	FAK Monoclonal antibody	1:1000
Cell Signaling Technology	8556T	Phospho-FAK (Tyr397)	1:1000
Proteintech	11224-1-AP	Alpha Tubulin Polyclonal antibody	1:5000
Santa Cruz Biotechnology	sc-393451	IQGAP3 Antibody	WB(1:200)/IP(5 µg)
Proteintech	25930-1-AP	IQGAP3 Polyclonal antibody	1:1000
Cell Signaling Technology	12292T	TEAD1 (D9X2L) Rabbit mAb	1:1000
Proteintech	21159-1-AP	TEAD2 Polyclonal antibody	1:1000
Proteintech	13120-1-AP	TEAD3 Polyclonal antibody	1:1000
Cell Signaling Technology	51705T	N-Myc (D4B2Y) antibody	1:1000
Santa Cruz Biotechnology	sc-13130	Cdk9 Antibody	1:200
Abcam	ab129195	Anti-KDM1/LSD1 antibody	1:1000
Novus Biologicals	NBP2-22117SS	YAP1 Antibody	WB(1：1000)/IP(5 µg)
Proteintech	13584-1-AP	YAP1 Polyclonal antibody	1:1000
Novus Biologicals	NB100-1813	NCAPG2 Antibody	1:1000
Proteintech	23404-1-AP	WDR62 Polyclonal antibody	1:1000
Cell Signaling Technology	9718S	Phospho-Histone H2A.X (Ser139) antibody	1:1000
Cell Signaling Technology	7631T	Histone H2A.X antibody	1:1000
Cell Signaling Technology	5625T	Cleaved PARP antibody	1:1000
Cell Signaling Technology	9532S	PARP antibody	1:1000
Cell Signaling Technology	9661T	Cleaved Caspase-3antibody	1:1000
Proteintech	19677-1-AP	Caspase 3/p17/p19 Polyclonal antibody	1:1000
Thermo Fisher Scientific	PA5-53941	COBL Polyclonal Antibody	1:1000
Thermo Fisher Scientific	H00083543-B01P	C9orf58/AIF1L Polyclonal Antibody	1:1000
Proteintech	17168-1-AP	Histone H3 Polyclonal antibody	1:5000
Proteintech	12197-1-AP	WWP2 Polyclonal antibody	1:1000
Proteintech	66937-1-Ig	UBR5 Monoclonal antibody	1:1000
Proteintech	14851-1-AP	CUL4A-Specific Polyclonal antibody	1:1000
Proteintech	27013-1-AP	TRIM26 Polyclonal antibody	1:1000
Sigma-Aldrich	F7425	ANTI-FLAG® antibody	0.4 ug/ml
Proteintech	26765-1-AP	mCherry Polyclonal antibody	1:1000
Proteintech	80992-1-RR	ubiquitin antibody	1:1000
Proteintech	51064-2-AP	HA tag Polyclonal antibody	1:5000
Cell Signaling Technology	7074S	Anti-rabbit IgG, HRP-linked Antibody	1：3000
Proteintech	27156-1-AP	ATM Polyclonal antibody	1:1000
Cell Signaling Technology	5883T	Phospho-ATM (Ser1981)	1:1000
Proteintech	19787-1-AP	ATR Polyclonal antibody	1:1000
Cell Signaling Technology	30632T	Phospho-ATR (Thr1989)	1:1000
Proteintech	22362-1-AP	BRCA1 Polyclonal antibody	1:1000
Cell Signaling Technology	9009T	Phospho-BRCA1 (Ser1524) Antibody	1:1000
Proteintech	25887-1-AP	Chk1 Polyclonal antibody	1:1000
Cell Signaling Technology	2348T	Phospho-Chk1 (Ser345)	1:1000
Cell Signaling Technology	65653T	RAD51	1:1000
Proteintech	19983-1-AP	DNA-PKcs Polyclonal antibody	1:500
Cell Signaling Technology	68716T	Phospho-DNA-PKcs (Ser2056)	1:1000
Cell Signaling Technology	7076S	Anti-mouse IgG, HRP-linked Antibody	1：3000
ChIP antibody
Company	Cat#	Name	Dilution
Proteintech	13584-1-AP	YAP1 Polyclonal antibody	5 µg
Cell Signaling Technology	12292T	TEAD1 (D9X2L) Rabbit mAb	5 µg
Thermo Fisher Scientific	MA1-014	SOX2 Monoclonal Antibody (20G5)	5 µg

## Sheet: Plasmid
Knockdown plasmids
Company	Cat#	Gene
Sigma-Aldrich	TRCN0000015799	shTEAD1.1
Sigma-Aldrich	TRCN0000015800	shTEAD1.2
Sigma-Aldrich	TRCN0000107265	shYAP1.1
Sigma-Aldrich	TRCN0000107266	shYAP1.2
Sigma-Aldrich	TRCN0000047508	shIQGAP3.1
Sigma-Aldrich	TRCN0000047510	shIQGAP3.2
Sigma-Aldrich	TRCN0000320847	shWWP2.1
Sigma-Aldrich	TRCN0000001515	shWWP2.2
Sigma-Aldrich	TRCN0000004049	shTRIM26.1
Sigma-Aldrich	TRCN0000004050	shTRIM26.2
Sigma-Aldrich	TRCN0000006529	shCUL4A.1
Sigma-Aldrich	TRCN0000006530	shCUL4A.2
Sigma-Aldrich	TRCN0000003412	shUBR5.1
Sigma-Aldrich	TRCN0000226458	shUBR5.2
