# Supplementary material
Source: Research Square preprint supplement (doi:10.21203/rs.3.rs-6009404/v1)
Supplement: Supplementary file 14 [file f49a34338832285b67dfc742.xlsx]

## Sheet: Lidock score≥100
Lidock score≥100
name	lidock score	cat
Tannic acid	225.086	HY-B2136
AZD1722 (hydrochloride); RDX5791 (hydrochloride)	222.309	HY-15991A
ICI-118630 (acetate)	207.81	HY-13673A
DOTATOC; SDZ-SMT 487; SMT 487	197.975	HY-106033
LY333328 diphosphate	194.72	HY-B1831A
CL 318952	179.208	HY-B0146
Org25969	178.029	HY-B0079
PPI 149 (Acetate); R 3827 (Acetate)	177.525	HY-13534A
FAD (disodium salt); FAD-Na2	174.459	HY-B1654A
FK 463 (sodium)	173.538	HY-16321
GS-9350	172.679	HY-10493
MK-8742	171.548	HY-15789
ABT 538; RTV	168.379	HY-90001
9-Hydroxyrisperidone palmitate	167.779	HY-A0019A
Glycyrrhizic acid (dipotassium); Dipotassium glycyrrhizate	167.085	HY-N0184A
ICI-50123	167.014	HY-A0261
ABT-450; Veruprevir	164.391	HY-12594
Polyene phosphatidylcholine	164.303	HY-B2235
Cisatracurium besylate	151.112	HY-13596
AZD1722 (hydrochloride); RDX5792 (hydrochloride)	147.873	HY-B0292A
ICI-118631 (acetate)	144.634	HY-B0108
DOTATOC; SDZ-SMT 487; SMT 488	141.395	HY-B0606
LY333329 diphosphate	138.157	HY-10465
129Y83	158.612	HY-109506
Collettiside III; CCRIS 4123	158.465	HY-N0124
BMS-650032	155.898	HY-14434
Aminosidine (sulfate)	155.85	HY-B0956
Ganirest	155.34	HY-109532
AD-32	155.261	HY-13772
MK-5172 (potassium salt)	154.552	HY-15298A
MK-639; L735524	154.129	HY-B0689A
PT-141 Acetate	153.389	HY-18678A
R51211	153.358	HY-17514
Deferoxamine B; Deferriferrioxamine B; Deferrioxamine	152.693	HY-B1625
CR-845; FE-202845	152.438	HY-17609
Hesperetin 7-rutinoside	151.377	HY-15337
SCH 56592	151.107	HY-17373
SMS 201-995 (acetate)	150.604	HY-17365
BAL8557-002	150.576	HY-100373
NSC 153858	150.33	HY-13674
Ro 31-8959	150.303	HY-17007
Rovamycin	149.343	HY-100593
BMS-232632	149.282	HY-17367
GS-5885	149.149	HY-15602
α-Hypophamine (acetate); Oxytocic hormone (acetate)	148.825	HY-17571A
BAY g 5421	148.802	HY-B0089
Mithramycin A	147.828	HY-A0122
Alarelin	147.547	HY-17405
XRP6258; RPR-116258A; taxoid XRP6258	147.491	HY-15459
VX-950	147.292	HY-10235
CTM-HE (hydrochloride); SCE-2174 (hydrochloride)	147.005	HY-A0110A
Neomycin B (sulfate); Fradiomycin B (sulfate)	146.207	HY-17624A
MK0476 (free base)	146.045	HY-13315A
ABT-378	145.316	HY-14588
GS-5734	144.709	HY-104077
HPN-100	144.561	HY-B2087
PKC412; CGP 41251	144.245	HY-10230
MK0476	143.324	HY-13315
L-Glutathione oxidized; GSSG; Oxiglutatione	143.283	HY-D0844
NCX116; LBN	143.099	HY-19518
CP 52640-2	142.881	HY-B0210A
20(S)-Propanaxadiol; S-ginsenoside Rg3	142.79	HY-N0603
Amethopterin (disodium); CL14377 (disodium); WR19039 (disodium)	142.619	HY-14519A
LY303366	142.428	HY-13553
ABT-199; GDC-0199; RG7601	142.335	HY-15531
Vitamin K2(MK-4); Menaquinone K4	141.898	HY-B2156
PNU-140690	141.365	HY-15148
DE-117	141.223	HY-111406
HOE 140 (acetate)	141.144	HY-108896
ICI 182780; ZD 9238; ZM 182780	140.982	HY-13636
MK-0869; MK-869; L-754030	140.928	HY-10052
ITMN-191; R7227; RO5190591; RG7227	140.666	HY-10238
THP Hydrochloride	140.567	HY-13725A
Agrept; Agrimycin; Streptomycin A	140.489	HY-B1906
BMY-13754; MJ-13754-1	139.752	HY-B1396
AEGR-733 mesylate; BMS-201038 mesylate	139.742	HY-14668
CP-4126; CO-101; Gemcitabine 5'-elaidate	139.541	HY-13538
VP-16; VP-16-213	139.233	HY-13629
Phylloquinone; Phytomenadione	139.119	HY-N0684
DHEC (mesylate)	139.082	HY-N2319
MK-933	138.658	HY-15310
Vitamin B9; Vitamin M	138.614	HY-16637
DXP	138.58	HY-128922
ONO-1078	138.471	HY-B0290
SKQ1	138.415	HY-100474
Tetrahydrolipstatin; Ro-18-0647	138.253	HY-B0218
BAL5788 (sodium)	137.837	HY-106574A
SQ28555	137.734	HY-B0382
Octylonium bromide; SP63	136.979	HY-B0499A
VM26	136.887	HY-13761
NZ-105 hydrochloride monoethanolate	136.829	HY-12502A
Fondaparin sodium; SR-90107A	136.541	HY-B0597
Fluprostenol isopropyl ester; AL6221; Flu-Ipr	136.483	HY-B0584
ONO1101 (hydrochloride)	136.047	HY-100607A
LY231514 disodium	136.041	HY-10820A
MDL-63397 (hydrochloride); BI-397 (hydrochloride)	135.585	HY-17586
MD-805 (monohydrate); MCI-9038 (monohydrate); Argipidine (monohydrate)	135.554	HY-B0375A
OPC-34712	135.377	HY-15780
Glycyrrhizin	135.306	HY-N0184
MK-5172	135.297	HY-15298
AR-C69931MX (tetrasodium)	135.245	HY-19638A
AG 1343 Mesylate	135.14	HY-15287A
AG1341	135.14	HY-15287
GS-7340	135.02	HY-15232
GS-7340 (fumarate)	135.02	HY-15232A
TAK-491	134.851	HY-14736
Lopramine	134.657	HY-12390
TMC435; TMC435350	134.207	HY-10241
SR 33589	134.204	HY-A0016
Albamycin (sodium); Cathomycin (sodium)	133.937	HY-B0425A
GR 33343X xinafoate	133.936	HY-17453
GSK-1265744; S/GSK1265744	133.638	HY-15592
Omacetaxine mepesuccinate; HHT	133.608	HY-14944
BAY 41-6551 (disulfate)	133.552	HY-B0509B
GW642444	133.455	HY-14300
ICI 204219	133.265	HY-17492
GS-5816	133.183	HY-12530
Sodium heparin (MW 15kDa); Sodium heparinate (MW 15kDa)	133.036	HY-17567C
Daunomycin (hydrochloride); RP 13057 (hydrochloride); Rubidomycin (hydrochloride)	133.027	HY-13062
ABT-493	132.927	HY-17634
OPA-15406	132.677	HY-109085
Trimetrexate	132.565	HY-10373
BAF-312	132.497	HY-12355
RAD001; SDZ-RAD	132.47	HY-10218
GW433908G	132.424	HY-17431
Potassium dehydroandrographolide succinate	132.312	HY-N0677A
Sultamicillin (tosilate)	132.048	HY-N7111
SOM230 (acetate)	131.962	HY-16381A
EMD 68843 (Hydrochloride); SB659746A (Hydrochloride)	131.536	HY-14261
EMD 68843; SB659746A	131.536	HY-14262
leucovorin	131.349	HY-17556
MDL-16455 (hydrochloride); Terfenadine carboxylate (hydrochloride)	131.074	HY-B0801A
R 43512	130.994	HY-12532
AGN 192024	130.939	HY-B0191
BI 6727	130.693	HY-12137
TD-4208; GSK1160724	130.687	HY-15851
AR-DF 26	130.177	HY-B1114
BM 14190	130.124	HY-B0006
Ro 40-5967 (dihydrochloride)	129.64	HY-15553A
CP-336156 (tartrate)	129.457	HY-A0038
CV-4093	129.312	HY-17403
ME2906; Mono-L-aspartyl chlorin e6; NPe6	129.02	HY-16477
NMS-E628; RXDX-101	128.688	HY-12678
TMC114 (Ethanolate)	128.62	HY-17041
TMC114; UIC-94017	128.62	HY-17040
Super Squalene; trans-Squalene; AddaVax	128.482	HY-N1214
CS 866	128.261	HY-17005
Cyclocytidine hydrochloride; Cyclo-CMP hydrochloride; Cyclo-C	128.221	HY-N0093
TCV-116	128.209	HY-17505
SHR3162; Fuzuloparib	128.193	HY-114778
ZD1694; D1694; ICI-D1694	128.165	HY-10821
GS 0840	128.082	HY-B0255
S/GSK1349572	128.072	HY-13238
AFP-168; MK2452	127.787	HY-B0600
LY231514	127.583	HY-10820
Melphalan flufenamide (hydrochloride)	127.477	HY-105019A
GS-7977; PSI-7977	127.403	HY-15005
UK-427857	127.378	HY-13004
ADL 8-2698 dihydrate; LY 246736 dihydrate	127.359	HY-76657A
AHU-377 (hemicalcium salt)	127.32	HY-15407A
9-Hydroxyrisperidone	127.297	HY-A0019
CS-045	127.283	HY-50935
Mucomycin	127.272	HY-106339
NBI-56418	127.124	HY-14789
RU-28965	127.105	HY-B0435
Trioctanoin; Glyceryl trioctanoate	127.103	HY-B1804
5-MTHF	126.929	HY-14781
Methylprednisolone hydrogen succinate	126.902	HY-B1900
(+)-α-Tocopherol; D-α-Tocopherol	126.853	HY-N0683
DL-α-Tocopherol	126.853	HY-W020044
Cytidine diphosphate-choline (sodium); CDP-Choline (sodium); Cytidine 5'-diphosphocholine (sodium)	126.79	HY-B0739A
Almitrine bismesylate; Almitrine bismethanesulfonate; Almitrine dimesylate	126.729	HY-107319
AFP-172	126.694	HY-B0601
Vitamin A palmitate; Retinol palmitate	126.497	HY-B1384
SCH 727965	126.473	HY-10492
CI-906	126.461	HY-B0477
Mitozantrone (dihydrochloride); NSC 301739 (dihydrochloride)	126.149	HY-13502A
Mitozantrone; NSC 301739	126.149	HY-13502
Acocantherine; G-Strophanthin	126.071	HY-B0542
A1443; AH252723	126.037	HY-16973
RP54476	126.037	HY-A0241
RPR251526	125.679	HY-B0625
ABT-627 (hydrochloride); (+)-A 127722 (hydrochloride); A-147627 (hydrochloride)	125.635	HY-15403A
ML-1709460	125.598	HY-108365
PHXA41	125.544	HY-B0577
Leurocristine (sulfate); NSC-67574 (sulfate); 22-Oxovincaleukoblastine (sulfate)	125.502	HY-N0488
GSK-1265744 (sodium); S/GSK1265744 (sodium)	125.419	HY-15592A
Sodium azlocillin	125.31	HY-B0529A
Hydroxyhomosildenafil	125.185	HY-123210
R-16341	125.184	HY-B1077
RE-021; DARA-a	125.166	HY-17621
(±)-Terfenadine; MDL-991	125.16	HY-B1193
BAY1021189	125.147	HY-16774
BAY-f 1353 (sodium)	125.099	HY-B1466
APD334	125.021	HY-12789
EBP 520; SCH 503034	124.739	HY-10237
BC-48	124.687	HY-B1626A
GW572016 (ditosylate); GW2016 (ditosylate)	124.687	HY-50898A
GW572016; GW2016	124.687	HY-50898
MS-551	124.647	HY-B0772A
Glimperide; HOE-490	124.377	HY-B0104
Sodium piperacillin	124.373	HY-B1286
S/GSK1349572 (sodium)	124.371	HY-13238A
JNJ 28431754	124.352	HY-10451
JNJ 28431754 (hemihydrate)	124.352	HY-I0383
CL13900 (dihydrochloride)	123.924	HY-B1743A
SAR 1118 (sodium); SHP-606 (sodium)	123.843	HY-19344A
TA-6366 (free base)	123.448	HY-B1451A
Amprenavir phosphate; GW 433908	123.325	HY-78726
CS 905	123.313	HY-B0023
Suramin (hexasodium salt)	123.257	HY-B0879A
VX-478	123.243	HY-17430
12-Deoxycholyltaurine	123.075	HY-N2027
Tauroursodeoxycholic acid (dihydrate); TUDCA (dihydrate); UR 906 (dihydrate)	123.075	HY-19696B
Tauroursodeoxycholic acid; TUDCA; UR 906	123.075	HY-19696
Harmonyl	122.874	HY-107339
Disodium Cromoglycate; FPL-670	122.857	HY-B0320A
Latamoxef (sodium); Lamoxactam (sodium); LY-127935 (sodium)	122.718	HY-B1484
GW572016 (ditosylate monohydrate); GW2016 (ditosylate monohydrate)	122.717	HY-50898B
Dioctyl sulfosuccinate (sodium salt)	122.658	HY-B1268
Pyritinol dihydrochloride; Pyridoxine disulfide dihydrochloride; Vitamin B6 disulfide dihydrochloride	122.622	HY-B0910A
BRL-4910A (calcium hydrate); Pseudomonic acid (calcium hydrate)	122.617	HY-N7068
BRL-4910A; Pseudomonic acid	122.617	HY-B0958
MSP-2017; (-)-MSP-2017	122.583	HY-17611
DHA; Cervonic acid	122.53	HY-B2167
FRG-8813	122.467	HY-B0160
LOXO-101 (sulfate); ARRY-470 (sulfate)	122.377	HY-12866A
LOXO-101; ARRY-470	122.377	HY-12866
Adenosine-5'-triphosphate (disodium trihydrate)	122.148	HY-B2176A
Amethopterin; CL14377; WR19039	121.873	HY-14519
AZD5363	121.754	HY-15431
Glyburide	121.747	HY-15206
Deacetyllanatoside C; Desacetyllanatoside C	121.737	HY-A0154
AZD2281; KU0059436	121.728	HY-10162
STI571; CGP-57148B	121.72	HY-15463
CGS14824A	121.682	HY-B0093A
BMY-40481	121.651	HY-13630
Silibinin A	121.639	HY-13748
BMS-512148	121.566	HY-10450
BMS-512148 (2S)-1,2-propanediol, hydrate	121.566	HY-10450A
CS-514 (sodium)	121.376	HY-B0165A
TPGS; D-α-Tocopherol polyethylene glycol 1000 succinate; Vitamin E-TPGS	121.305	HY-B0717
Daidzoside; NPI-031D; Daidzein 7-O-glucoside	121.224	HY-N0018
RC-1291 hydrochloride; ONO-7643 hydrochloride	121.211	HY-14734A
RC-1291; ONO-7643	121.211	HY-14734
BIBR 277	121.094	HY-13955
KW-2307; Nor-5'-anhydrovinblastine ditartrate	121.085	HY-12053A
TD-5108	121.058	HY-10457
TD-5108 (hydrochloride)	121.058	HY-10457A
Kanamycin B	121.031	HY-B1174
(+)-Irinotecan (hydrochloride trihydrate); CPT-11 (hydrochloride trihydrate)	120.771	HY-16568
(+)-Irinotecan (hydrochloride); CPT-11 (hydrochloride); VAL-413	120.771	HY-16562A
(+)-Irinotecan; CPT-11; VAL-413(free base)	120.771	HY-16562
MCI-9042	120.742	HY-10564
JNJ-42756493	120.74	HY-18708
RS-10085	120.704	HY-B0378A
KX2-391 (Mesylate); KX01 (Mesylate)	120.647	HY-10340B
KX2-391 (dihydrochloride); KX-01 (dihydrochloride)	120.647	HY-10340A
KX2-391; KX-01	120.647	HY-10340
FMN-Na; Riboflavin 5'-phosphate sodium; Vitamin B2 Phosphate Sodium Salt	120.624	HY-B0964
Calcium levofolinate; CL307782	120.588	HY-13667
AHU-377	120.581	HY-15407
TA-0910	120.568	HY-B0596
TA-0910 (acetate)	120.568	HY-B0596A
HHGV678	120.481	HY-13904
HHGV678 mesylate	120.481	HY-13905
DA8159	120.411	HY-18253
SCH-20569 (sulfate)	120.408	HY-A0086
CD271	120.334	HY-B0091
EPA ethyl ester; Ethyl eicosapentaenoate	120.272	HY-B0747
CS-8958	120.201	HY-14818A
SAR 1118; SHP-606	120.187	HY-19344
OPT-80; PAR-101	119.941	HY-17580
CP 28720; K 4024	119.921	HY-B0254
R 065824 hydrochloride	119.824	HY-B0203A
MK 0518 (potassium)	119.726	HY-10353A
L-749345; MK-826	119.599	HY-13625
SM-9018	119.506	HY-B0731
SM-9018 (free base)	119.506	HY-B0731A
XU 62-320	119.43	HY-14664A
Carbenicillin indanyl sodium; CP-15464-2	119.411	HY-108880
Cephamandole sodium	119.408	HY-B1128A
AR-13324 (dimesylate)	119.383	HY-12798A
AR-13324 (hydrochloride)	119.383	HY-12798B
PF-3084014; PF-03084014	119.353	HY-15185
AG-348	119.326	HY-12689
Genz 99067	119.294	HY-14885
Genz-112638; Eliglustat tartrate	119.294	HY-14885A
Alprostadil; PGE1	119.237	HY-B0131
BLU-667	119.207	HY-112301
LAS-W 090; RP64305	119.133	HY-B0674
UX007	118.983	HY-W013136
AB-1010 mesylate	118.944	HY-10209A
AB1010	118.944	HY-10209
PF-04971729	118.898	HY-15461
PF-04971729 L-pyroglutamic acid	118.898	HY-15461A
R33812	118.86	HY-B0411
Bisibuthiamine	118.813	HY-B2229
Sirolimus; AY-22989	118.738	HY-10219
NBI-56418 sodium	118.6	HY-14369
SCH 58235	118.6	HY-17376
KD025 (mesylate); SLx-2119 (mesylate)	118.577	HY-15307A
KD025; SLx-2119	118.577	HY-15307
KT-611; BM-15275	118.43	HY-B0391
(+)-Ketoconazol; (+)-R 41400	118.427	HY-B0105A
(-)-Ketoconazol; (-)-R 41400	118.427	HY-B0105B
Ketoconazol; R 41400	118.427	HY-B0105
BRL 49653	118.419	HY-17386
BRL 49653 (hydrochloride)	118.419	HY-17386A
BRL 49653C	118.419	HY-14600
CGP 60536 (hemifumarate); CGP60536B (hemifumarate); SPP 100 (hemifumarate)	118.4	HY-12177
CGP 60536; CGP60536B; SPP 100	118.4	HY-12176
AC220	118.244	HY-13001
L700462 (hydrochloride monohydrate); MK383 (hydrochloride monohydrate)	118.126	HY-17369
ABT-267	117.985	HY-13997
SB1518	117.954	HY-16379
ITI-007 (tosylate)	117.875	HY-19733
FK-037	117.782	HY-B0186B
IY-5511	117.599	HY-15728
Oxantel embonate	117.585	HY-B1344
Pyrantel embonate	117.585	HY-12640
X-396 (dihydrochloride)	117.514	HY-103714A
QAB149	117.494	HY-14299A
MLN9708	117.329	HY-10452
Methylprednisolone hydrogen succinate (sodium)	117.31	HY-B1060
STI571 (Mesylate); CGP-57148B (Mesylate)	117.269	HY-50946
BMS-562247-01	117.17	HY-50667
VX-445	117.169	HY-111772
Keoxifene (hydrochloride); LY156758; LY139481 (hydrochloride)	117.153	HY-13738A
Keoxifene; LY156758 (free base); LY139481	117.153	HY-13738
LAS 34273; LAS-W 330	117.087	HY-14144
SCE-129 (sodium)	117.079	HY-13588
MK-3102	117.035	HY-15981
MK-521	116.871	HY-18206
MK-521 (dihydrate)	116.871	HY-18206A
MK-421 (maleate)	116.691	HY-B0331A
Baicalein 7-O-β-D-glucuronide	116.627	HY-N0197
YH25448; GNS-1480	116.274	HY-109061
4'-Epidoxorubicin (hydrochloride)	116.199	HY-13624A
Hydroxydaunorubicin (hydrochloride)	116.199	HY-15142
FPL60278AR	116.172	HY-U00205
RU-0211; SPI-0211	116.167	HY-B0679
Fosinoprilat; Fosinoprilic acid; SQ 27519	116.159	HY-107352
UK 68789	116.109	HY-B0232
Th-1165; Phenoterol	116.091	HY-B0976
Th-1165a; Phenoterol (hydrobromide)	116.091	HY-B0976A
GS-9883 (sodium)	116.08	HY-17605A
RU44570	116.071	HY-B0592
HePC; Hexadecyl phosphocholine	115.872	HY-13685
Ro 31-2848 monohydrate	115.838	HY-A0043A
R 51619; (±)-Cisaprid	115.82	HY-14149
SQ26991	115.803	HY-B0655
SK-3530 dihydrochloride	115.751	HY-14930A
SK3530	115.751	HY-14930
SCH619734	115.686	HY-14751
AJM300	115.548	HY-124290
L084	115.538	HY-B0396
LC15-0444 (tartrate)	115.501	HY-14892A
TA-6366	115.459	HY-B1451
Bis(POC)-PMPA; GS 4331	115.42	HY-13782A
Tenofovir DF; Bis(POC)-PMPA (fumarate); GS 4331 (fumarate)	115.42	HY-13782
LY2835219	115.414	HY-16297A
LY2835219 (methanesulfonate)	115.414	HY-16297
Ademetionine (disulfate tosylate); S-Adenosyl methionine (disulfate tosylate); AdoMet (disulfate tosylate)	115.319	HY-W017770
GSK2118436 Mesylate; GSK 2118436B	115.261	HY-14660A
GSK2118436A; GSK2118436	115.261	HY-14660
TA1790	115.184	HY-18252
BLU-285	115.171	HY-101561
TAS-120	115.143	HY-100818
Cytidine diphosphate-choline; CDP-Choline; Cytidine 5'-diphosphocholine	115.043	HY-B0739
R 50547 (hydrochloride)	115.035	HY-14277A
BAY u3405	114.967	HY-B0745
MK-0431	114.951	HY-13749
MK-0431 (phosphate monohydrate)	114.951	HY-13749B
MK-0431 (phosphate)	114.951	HY-13749A
SCE-2787 hydrochloride	114.844	HY-B0771A
R403323; TMC207 fumarate; R207910 fumarate	114.816	HY-14881A
TMC207; R207910	114.816	HY-14881
ED-71; 2-(3-hydroxypropoxy)-1,25-dihydroxyvitamin D3	114.792	HY-A0020
LX-4211; LP-802034	114.78	HY-15516
SCH 33844 (hydrochloride)	114.706	HY-A0230A
Hydrocortisone 21-hemisuccinate	114.683	HY-B1402
ACT-064992	114.649	HY-14184
Prednisolone 21-hemisuccinate	114.601	HY-B1087
SKF-102886; WR-171669 (hydrochloride)	114.553	HY-A0148A
BAY 632521	114.531	HY-14779
DS-3201	114.516	HY-109108
DS-3201 (tosylate)	114.516	HY-109108A
BIMT-17; BIMT-17BS	114.41	HY-A0095
12-Deoxycholyltaurine (sodium)	114.336	HY-N1429
Tauroursodeoxycholic acid (sodium); TUDCA (sodium); UR 906 (sodium)	114.336	HY-19696A
Volitinib; HMPL-504; AZD-6094	114.202	HY-15959
CL-34699	114.061	HY-B1197
UK-92480	114.013	HY-15025
UK-92480 (citrate)	114.013	HY-15025A
PS-341; LDP-341; NSC 681239	114.009	HY-10227
17α,20-dimethyl-δ2-PGE1; ONO1206; OP1206	113.984	HY-B0683
R6238	113.965	HY-12987
Sodium taurodeoxycholate (monohydrate)	113.812	HY-B1899A
BIBR 1048	113.764	HY-10274
BIBR 1048MS; Dabigatran etexilate methanesulfonate	113.764	HY-10274A
UK 33274 mesylate	113.738	HY-B0098A
LNP023	113.729	HY-127105
Betamethasone 21-phosphate disodium salt; Vista-Methasone	113.716	HY-13570C
Dexamethasone 21-phosphate (disodium)	113.716	HY-B1829A
WIN 13146	113.633	HY-19594
MT-141	113.498	HY-128932
UT-15	113.483	HY-100441
GZD824 (dimesylate); HQP1351 (dimesylate)	113.471	HY-15666A
GZD824; HQP1351	113.471	HY-15666
CI-981; Atorvastatin hemicalcium	113.452	HY-17379
DU-176	113.426	HY-10264
DU-176b	113.426	HY-10264A
DU-176b (monohydrate)	113.426	HY-10264B
MRTX849	113.323	HY-130149
NM441	113.315	HY-B0024
15(S)-15-Methyl Prostaglandin F2α; 15-Methyl-PGF2α	113.222	HY-128428
U 90152 (mesylate); BHAP-U 90152 (mesylate)	113.154	HY-10571A
SCE-1365 (hydrochloride)	113.087	HY-B0875
R42470	112.943	HY-B1790
LY307640 (sodium)	112.919	HY-B0656A
TSE-424	112.835	HY-A0031
TSE-424 (acetate)	112.835	HY-A0036
Benzyldimethylhexadecylammonium (chloride)	112.774	HY-B1597
AG-221	112.722	HY-18690
AG-221 (mesylate)	112.722	HY-18690A
AIC246; MK-8228	112.72	HY-15233
Kanamycin A (sulfate)	112.713	HY-16566A
SCH619734 (hydrochloride hydrate)	112.676	HY-16436
MK-0518	112.591	HY-10353
Sodium cefmetazole	112.585	HY-B1257
U-76,252; CS-807	112.542	HY-N7101
XU 62-320 (free acid)	112.472	HY-14664
OPC 13013	112.304	HY-17464
GR20263	112.232	HY-B0593
GR20263 (pentahydrate)	112.232	HY-B0593A
NK-104	112.205	HY-B0144A
(R)-(-)-YM12617 (free base); LY253351 (free base)	112.201	HY-B0661
VX-809; VRT 826809	112.18	HY-13262
PF-02341066	112.145	HY-50878
PF-02341066 (hydrochloride)	112.145	HY-50878A
TAK-370 citrate; AS-4370 citrate	112.122	HY-B0189A
UT-15 (sodium)	112.094	HY-16504
KW-3049	111.941	HY-B1448
Adenosine 5'-triphosphate (dimagnesium)	111.917	HY-B2176B
AA 2414	111.842	HY-B0774
(±)-UK-88525	111.795	HY-22437
Vistamycin (sulfate)	111.778	HY-B1228
AG-EE 623ZW	111.769	HY-15209
Amoxycillin	111.759	HY-B0467A
Amoxycillin (trihydrate)	111.759	HY-B0467B
HOE-498	111.747	HY-B0279
VX-661	111.745	HY-15448
TAK-599; PPI0903	111.72	HY-14737
KHK7580	111.716	HY-17613
Mevinolin	111.648	HY-N0504
Lu 23-174	111.62	HY-14543
Amebacilin; NSC9168	111.588	HY-B0751
Fludroxycortide; Flurandrenolone	111.553	HY-B1013
CKD-602	111.464	HY-13566A
Benflumetol	111.333	HY-B0803
AP-26113	111.302	HY-12857
LOXO-292	111.245	HY-114370
BI 10773	111.231	HY-15409
BMS-379224 (L-lysine ethanolate); E-1224 (L-lysine ethanolate)	111.221	HY-16779B
ONO-4059 (hydrochloride); GS-4059 (hydrochloride)	111.194	HY-15771A
ONO-4059; GS-4059	111.194	HY-15771
Thyrotropin-releasing-hormone (acetate); TRH (acetate)	111.155	HY-P0002A
R788	111.149	HY-13038A
Pipracil	111.052	HY-B1923
UK-88525 (hydrobromide)	111.038	HY-A0012
R 667; Ro 3300074	110.963	HY-14799
INT-747; 6-ECDCA; 6-Ethylchenodeoxycholic acid	110.946	HY-12222
ACP-103	110.865	HY-14557
ACP-103 (hemitartrate)	110.865	HY-14557A
EI546; LY544349; ONO5046	110.805	HY-17443
JP-992 (hydrochloride)	110.744	HY-B1058
Dehydrobenzperidol	110.682	HY-B1240
Nebramycin Factor 6; Deoxykanamycin B	110.646	HY-B0441
ASP2215	110.618	HY-12432
Eletriptan HBr; UK-116044 (hydrobromide)	110.618	HY-A0010
Trihydroxyethylrutin	110.582	HY-N0139
Carbetapentane	110.455	HY-134004
Carbetapentane (citrate)	110.455	HY-B1055
GSK573719A	110.454	HY-12100
Geranylgeranylacetone	110.352	HY-B0779
R-1206	110.345	HY-109056
CV205-502 hydrochloride	110.339	HY-13736A
OPC-67683	110.33	HY-10846
FCE-21336	110.321	HY-15296
PCI-32765	110.304	HY-10997
PCI-32765 (Racemate)	110.304	HY-10997A
4-Demethoxydaunorubicin hydrochloride	110.272	HY-17381
Tenivastatin (ammonium)	110.256	HY-119695A
S-Adenosyl methionine (tosylate); Ademetionine (tosylate); AdoMet (tosylate)	110.235	HY-B0617A
LCZ696	110.102	HY-18204A
PTK 0796 (tosylate); Amadacycline (tosylate)	110.09	HY-14865B
PTK 0796; Amadacycline	110.09	HY-14865
PTK0796 hydrochloride; Amadacycline hydrochloride	110.09	HY-14865C
SA-79	110.088	HY-B0432
SA-79 (hydrochloride)	110.088	HY-B0432A
UCB 1402 (dihydrochloride)	110.022	HY-A0075
UCB-1402; NSC289116	110.022	HY-17582
LY317615	110.02	HY-10342
Indoramine; Wy 21901	110.01	HY-12760
GS-9883	109.995	HY-17605
YC-93	109.975	HY-12515A
HP 873	109.92	HY-17410
INC280 (dihydrochloride hydrate); INCB-28060 (dihydrochloride hydrate)	109.844	HY-13404C
INC280; INCB28060	109.844	HY-13404
TG-101348 (hydrochloride hydrate); SAR 302503 (hydrochloride hydrate)	109.728	HY-10409A
TG-101348; SAR 302503	109.728	HY-10409
FRC-8653	109.725	HY-17404
Flupenthixol (dihydrochloride)	109.669	HY-15856B
Acetorphan	109.657	HY-17399
YM178	109.628	HY-14773
LY-210448 hydrochloride	109.53	HY-B0304A
PGE2; Dinoprostone	109.518	HY-101952
R18134	109.447	HY-B0454
R18134 nitrate	109.447	HY-B0454A
Nafronyl oxalate salt	109.446	HY-B1107
CERM 1978	109.366	HY-103315
BR-A-657	109.284	HY-B0780
GS-9137; JTK-303; D06677	109.162	HY-14740
Mepirodipine (hydrochloride); YM-09730-5	109.012	HY-107322
Refosporen	108.901	HY-121144
NS-304; ACT-293987	108.878	HY-14870
LBH589; NVP-LBH589	108.816	HY-10224
CYT387	108.762	HY-10961
XL184 (S-malate); BMS-907351 (S-malate)	108.755	HY-12044
XL184; BMS-907351	108.755	HY-13016
(±)-Bepridil (hydrochloride hydrate); Org 5730 (hydrochloride hydrate)	108.731	HY-16952A
Cetapril; DU-1219	108.704	HY-107318
ODM-201; BAY-1841788	108.676	HY-16985
HKI-272	108.564	HY-32721
HKI-272 (maleate)	108.564	HY-32721B
SB-275833	108.475	HY-17010
KAD 3213; KMD 3213	108.437	HY-10122
EI546 (sodium tetrahydrate); LY544349 (sodium tetrahydrate); ONO5046 (sodium tetrahydrate)	108.418	HY-17443B
ONO5046-Na; Sodium sivelestat; EI546 sodium; LY544349 sodium	108.418	HY-17443A
UR-12592 (Fumarate)	108.416	HY-13511A
S-8527	108.415	HY-13528
Rec-7-0040; DW61	108.382	HY-B0549A
ASP1941	108.339	HY-14894
Benzathine benzylpenicillin	108.24	HY-N7139A
Benzathine benzylpenicillin (tetrahydrate)	108.24	HY-N7139B
PGP (hydrate)	108.24	HY-N7120
SKI-606	108.232	HY-10158
SKI-606 (hydrate)	108.232	HY-10158A
SL 77499	108.191	HY-B0192
SL 77499-10	108.191	HY-B0192A
NK-104 (hemicalcium); Pitavastatin (hemicalcium)	108.136	HY-B0144
EPA; Timnodonic acid	108.126	HY-B0660
Ro4402257; R1503	108.088	HY-10405
CC-10004	107.938	HY-12085
Behenyl alcohol	107.929	HY-B0222
RS 61443; TM-MMF	107.809	HY-B0199
Biafungin (acetate); CD101 (acetate); SP-3025 (acetate)	107.739	HY-108009A
AV-951 (hydrochloride hydrate); KRN951 (hydrochloride hydrate)	107.685	HY-10977A
AV-951; KRN951	107.685	HY-10977
Podophyllotoxin	107.676	HY-15552
Cefalotin sodium	107.608	HY-B1275
RPC-1063	107.598	HY-12288
RPC-1063 (hydrochloride)	107.598	HY-12288A
R-18553 (hydrochloride)	107.584	HY-B0418A
AV-45	107.498	HY-129650
LX1032; LX1606	107.487	HY-13055A
LX1606 (Hippurate)	107.487	HY-13055
SKF-108566J	107.342	HY-15834A
SKF-108566J (free base)	107.342	HY-117743
m-THPC; KW2345	107.308	HY-16488
LOXO-305	107.257	HY-131328
AMG 073	107.226	HY-70037
AMG-073 (hydrochloride)	107.226	HY-70037A
D-(-)-α-Aminobenzylpenicillin	107.055	HY-B0522
D-(-)-α-Aminobenzylpenicillin (trihydrate)	107.055	HY-B0522B
HOE 760	107.022	HY-B0305A
BRL 42810	106.96	HY-17426
HDCA	106.945	HY-N0169
NDGA	106.939	HY-N0198
meso-Nordihydroguaiaretic acid; meso-NDGA	106.939	HY-109500
5'-AMP (monohydrate)	106.812	HY-A0181A
AMP	106.812	HY-A0181
TAK-385	106.812	HY-16474
CDB-3236; Deacetyl CDB-2914	106.786	HY-14959
Angiotensin II (acetate); Ang II (acetate); DRVYIHPF (acetate)	106.785	HY-13948A
Angiotensin II; Ang II; DRVYIHPF	106.785	HY-13948
Ro 15-8075	106.722	HY-B1894A
450191S	106.659	HY-U00228
MK-422	106.61	HY-B0231
(R)-(+)-Verapamil (hydrochloride)	106.598	HY-135336
(S)-(-)-Verapamil (hydrochloride)	106.598	HY-135336A
(±)-Verapamil (hydrochloride); CP-16533-1 (hydrochloride)	106.598	HY-A0064
(±)-Verapamil; CP-16533-1	106.598	HY-14275
Hyaluronan; Hyaluronate	106.549	HY-B0633A
CVT 303 (dihydrochloride); RS 43285	106.537	HY-17401
CVT 303; RS 43285-003	106.537	HY-B0280
SQ-26,776	106.529	HY-B0129
R 64 766	106.334	HY-11018
S-Benzoylthiamine O-monophosphate	106.324	HY-17374
IY-81149 (sodium)	106.25	HY-B2145
AP24534	106.041	HY-12047
AP24534 (hydrochloride)	106.041	HY-108766
BBI 4000	106.019	HY-109013
N-0923 (Hydrochloride)	105.97	HY-A0007
N-0923; (-)-N 0437	105.97	HY-75502
MP-601205 (isethionate)	105.914	HY-B0537B
Zucapsaicin; Civamide; cis-Capsaicin	105.851	HY-B1583
β-Estradiol 17-valerate	105.769	HY-B0672
SM-3997	105.759	HY-14558
SM-3997 (citrate)	105.759	HY-B0061
ENT-14250	105.73	HY-B1198
Ro 13-9904 (free acid)	105.705	HY-B0712
JTZ-951; SAL0951	105.573	HY-109057
Clindamycin 2-phosphate; U-28508	105.534	HY-B1064
OPC-8212	105.416	HY-15297
Dibutyryl cAMP (sodium salt); DBcAMP (sodium salt)	105.394	HY-B0764
MGCD0103	105.318	HY-12164
Vitamin B2; E101	105.285	HY-B0456
Prostaglandin F2α (tromethamine salt); PGF2α THAM; Prostaglandin F2α THAM	105.267	HY-12956A
Prostaglandin F2α; PGF2α	105.267	HY-12956
(E/Z)-BIBW 2992	105.25	HY-10261B
BIBW 2992	105.25	HY-10261
BIBW 2992MA2	105.25	HY-10261A
RGH-188	105.246	HY-14763
RGH188 hydrochloride	105.246	HY-14763A
Balsalazide disodium dihydrate	105.151	HY-B0667A
OPC-14597	105.142	HY-14546
LGX818	104.995	HY-15605
TPX-0005	104.989	HY-103022
BGB-3111	104.821	HY-101474A
Cephazolin (sodium)	104.734	HY-B1078
BI1744	104.73	HY-14301
BI1744 (hydrochloride)	104.73	HY-14301A
FCE 26743 (mesylate); EMD 1195686 (mesylate)	104.553	HY-70057A
FCE 26743; EMD 1195686	104.553	HY-70057
Surufatinib; HMPL-012	104.438	HY-12297
α-Lobeline (hydrochloride); L-Lobeline (hydrochloride)	104.435	HY-B0979
Hydrocortisone probutate; HBP	104.399	HY-106673
Hexadecylpyridinium chloride monohydrate	104.367	HY-B1289
HS-10296	104.328	HY-112823
HS-10296 (hydrochloride)	104.328	HY-112823B
HS-10296 (mesylate)	104.328	HY-112823A
RSD1235 hydrochloride	104.312	HY-14183
Norigest	104.171	HY-A0285
SU11654 (phosphate); PHA 291639E (phosphate)	104.098	HY-10330A
SU11654; PHA 291639E	104.098	HY-10330
OZ 277; RBx 11160	104.079	HY-10852
W-3566	103.95	HY-B1012
Sch66336	103.92	HY-15136
BMS-354825	103.908	HY-10181
BMS-354825 (hydrochloride)	103.908	HY-10181A
BMS-354825 (monohydrate)	103.908	HY-10181B
BYL-719	103.865	HY-15244
Dibutyryl cAMP (calcium salt); DBcAMP (calcium salt)	103.686	HY-B0764A
Desmethyl-vancomycin hydrochloride	103.536	HY-B1924
CVT-3146	103.531	HY-A0168
FR-17027; FK-027; CL-284635	103.527	HY-B1381
FK506 (monohydrate); Fujimycin (monohydrate); FR900506 (monohydrate)	103.502	HY-13756A
SU 11248	103.49	HY-10255A
SU 11248 (Malate)	103.49	HY-10255
PLX-3397	103.462	HY-16749
PLX-3397 (hydrochloride)	103.462	HY-16749A
P-005672 (hydrochloride)	103.276	HY-13858A
Xanthinol Niacinate	103.267	HY-B1815
Valaciclovir hydrochloride	103.24	HY-17425A
CGP 48933	103.213	HY-18204
BIBF 1120	103.163	HY-50904
BIBF 1120 (esylate)	103.163	HY-11106
(R)-Cetirizine	103.142	HY-B0814
(R)-Cetirizine (dihydrochloride)	103.142	HY-W010841
P071	103.142	HY-17042A
CSG-452 hydrate	103.129	HY-13413
OPC12759; Proamipide	103.11	HY-B0360
NSC 118218 (phosphate)	103.043	HY-B0028
LY3009104 (phosphate); INCB028050 (phosphate)	102.963	HY-15315A
LY3009104; INCB028050	102.963	HY-15315
DA-3177	102.94	HY-U00106
REC 15-1476	102.74	HY-B0359
LDK378	102.694	HY-15656
LDK378 (dihydrochloride)	102.694	HY-15656A
AKR-501 (hydrochloride); E5501 (hydrochloride); YM477 (hydrochloride)	102.653	HY-13463B
AKR-501; E5501; YM477	102.653	HY-13463
LY237216	102.553	HY-B0643
Prednisolone 21-phosphate disodium	102.498	HY-B0645
SM-13496 (Hydrochloride)	102.253	HY-B0032
EN-141	102.252	HY-B1920
RW22164 (acetate); RWJ22164 (acetate)	102.221	HY-17572A
NBI-98854	102.13	HY-16771
BAL-4815; RO-0094815	102.126	HY-14273
CAL-101; GS-1101	102.065	HY-13026
CP-358774 (hydrochloride); NSC 718781 (hydrochloride); OSI-774 (hydrochloride)	102.037	HY-12008
CP-358774; NSC 718781; OSI-774	102.037	HY-50896
MP-513 (hydrobromide)	102.013	HY-14806A
LY333531 (hydrochloride)	102.004	HY-10195B
LY333531 (mesylate)	102.004	HY-10195A
AH-5158 hydrochloride; Sch-15719W	101.965	HY-B1108
AH5158; Sch-15719W (free base)	101.965	HY-121383
SK-0403	101.96	HY-14877
TAK-375	101.935	HY-A0014
Tinnex (hydrochloride)	101.79	HY-106467B
TAK-788 (succinate); AP32788 (succinate)	101.78	HY-135815A
TAK-788; AP32788	101.78	HY-135815
(S)-Betaxolol hydrochloride; AL-1577A	101.763	HY-B0381B
SL75212	101.763	HY-B0381A
DuP-753 (potassium)	101.629	HY-17512A
Cefotaxim (sodium); HR-756 (sodium)	101.62	HY-A0088
KB-2796	101.561	HY-B0768A
Cefditoren pivoxyl; Cefditoren pivaloyloxymethyl ester; ME 1207	101.53	HY-17452A
(±)-Econazol	101.526	HY-B0885
SB939	101.519	HY-13322
Betamethasone 17-valerate	101.462	HY-B0727
Tri-O-acetyl uridine	101.453	HY-14905
R41468	101.414	HY-10562
R41468 tartrate	101.414	HY-10562A
RU486; RU 38486	101.395	HY-13683
FL-1039 hydrochloride	101.379	HY-B0810A
Amoxycillin (sodium)	101.37	HY-B0467
Sodium cholate	101.255	HY-N0324A
ZD-1839 hydrochloride	101.239	HY-50895A
ZD1839	101.239	HY-50895
Sodium fusidate; SQ-16360	101.188	HY-B1350A
AG-1749	101.18	HY-13662
Dexlansoprazole	101.18	HY-13662B
D-(-)-α-Aminobenzylpenicillin (sodium salt)	101.165	HY-B0522A
Rosuvastatin hemicalcium; ZD 4522 Calcium	101.128	HY-17504
KW-6002	101.096	HY-10888
Oleic acid (sodium); 9-cis-Octadecenoic acid (sodium); 9Z-Octadecenoic acid (sodium)	100.958	HY-N1446B
CDB-2914	100.867	HY-16508
DU21220 (hydrochloride)	100.865	HY-B0452
MP-513	100.847	HY-14806
MP-513 (hydrobromide hydrate)	100.847	HY-14806B
Propericiazine; RP 8909	100.802	HY-14263
HCQ (sulfate)	100.781	HY-B1370
TVX 1322	100.576	HY-B0482
PF-04449913	100.561	HY-16391
(E)-Capsaicin	100.5	HY-10448
SKF 104864A (hydrochloride); NSC 609669 (hydrochloride)	100.441	HY-13768A
ETC-1002; ESP-55016	100.307	HY-12357
GR-85548A hydrochloride	100.294	HY-B0197A
Ro 13-9904 (sodium hydrate)	100.275	HY-B0712A
MK-4827	100.201	HY-10619
MK-4827 (hydrochloride)	100.201	HY-10619A
MK-4827 (tosylate hydrate)	100.201	HY-10619E
MK-4827 (tosylate)	100.201	HY-10619B
Buphenine hydrochloride	100.118	HY-B1404
Ro 14-4767/002	100.056	HY-B0238
Pimaricin	100.032	HY-B0133
Amdinocillin; FL 1060	100.018	HY-A0269
DAN 2163	100.018	HY-14545
Prednisolone 21-acetate	100.004	HY-B1214

## Sheet: Screening according to Lipinski
Screening according to Lipinski
name	cat	lidock score
LY231514 disodium	HY-10820A	136.041
GS-7340	HY-15232	135.02
GSK-1265744; S/GSK1265744	HY-15592	133.638
Trimetrexate	HY-10373	132.565
AGN 192024	HY-B0191	130.939
Cyclocytidine hydrochloride; Cyclo-CMP hydrochloride; Cyclo-C	HY-N0093	128.221
SHR3162; Fuzuloparib	HY-114778	128.193
ZD1694; D1694; ICI-D1694	HY-10821	128.165
S/GSK1349572	HY-13238	128.072
ADL 8-2698 dihydrate; LY 246736 dihydrate	HY-76657A	127.359
AHU-377 (hemicalcium salt)	HY-15407A	127.32
9-Hydroxyrisperidone	HY-A0019	127.297
Methylprednisolone hydrogen succinate	HY-B1900	126.902
AFP-172	HY-B0601	126.694
SCH 727965	HY-10492	126.473
CI-906	HY-B0477	126.461
GSK-1265744 (sodium); S/GSK1265744 (sodium)	HY-15592A	125.419
Sodium azlocillin	HY-B0529A	125.31
BAY1021189	HY-16774	125.147
MS-551	HY-B0772A	124.647
Glimperide; HOE-490	HY-B0104	124.377
S/GSK1349572 (sodium)	HY-13238A	124.371
JNJ 28431754	HY-10451	124.352
JNJ 28431754 (hemihydrate)	HY-I0383	124.352
CL13900 (dihydrochloride)	HY-B1743A	123.924
TA-6366 (free base)	HY-B1451A	123.448
Tauroursodeoxycholic acid; TUDCA; UR 906	HY-19696	123.075
Tauroursodeoxycholic acid (dihydrate); TUDCA (dihydrate); UR 906 (dihydrate)	HY-19696B	123.075
12-Deoxycholyltaurine	HY-N2027	123.075
Pyritinol dihydrochloride; Pyridoxine disulfide dihydrochloride; Vitamin B6 disulfide dihydrochloride	HY-B0910A	122.622
FRG-8813	HY-B0160	122.467
LOXO-101; ARRY-470	HY-12866	122.377
LOXO-101 (sulfate); ARRY-470 (sulfate)	HY-12866A	122.377
AZD5363	HY-15431	121.754
AZD2281; KU0059436	HY-10162	121.728
CGS14824A	HY-B0093A	121.682
Silibinin A	HY-13748	121.639
BMS-512148	HY-10450	121.566
BMS-512148 (2S)-1,2-propanediol, hydrate	HY-10450A	121.566
CS-514 (sodium)	HY-B0165A	121.376
Daidzoside; NPI-031D; Daidzein 7-O-glucoside	HY-N0018	121.224
MCI-9042	HY-10564	120.742
JNJ-42756493	HY-18708	120.74
RS-10085	HY-B0378A	120.704
KX2-391; KX-01	HY-10340	120.647
KX2-391 (dihydrochloride); KX-01 (dihydrochloride)	HY-10340A	120.647
KX2-391 (Mesylate); KX01 (Mesylate)	HY-10340B	120.647
AHU-377	HY-15407	120.581
TA-0910	HY-B0596	120.568
TA-0910 (acetate)	HY-B0596A	120.568
CP 28720; K 4024	HY-B0254	119.921
R 065824 hydrochloride	HY-B0203A	119.824
MK 0518 (potassium)	HY-10353A	119.726
L-749345; MK-826	HY-13625	119.599
Cephamandole sodium	HY-B1128A	119.408
AR-13324 (dimesylate)	HY-12798A	119.383
AR-13324 (hydrochloride)	HY-12798B	119.383
AG-348	HY-12689	119.326
Genz 99067	HY-14885	119.294
Genz-112638; Eliglustat tartrate	HY-14885A	119.294
Alprostadil; PGE1	HY-B0131	119.237
PF-04971729	HY-15461	118.898
PF-04971729 L-pyroglutamic acid	HY-15461A	118.898
R33812	HY-B0411	118.86
KT-611; BM-15275	HY-B0391	118.43
BRL 49653C	HY-14600	118.419
BRL 49653	HY-17386	118.419
BRL 49653 (hydrochloride)	HY-17386A	118.419
L700462 (hydrochloride monohydrate); MK383 (hydrochloride monohydrate)	HY-17369	118.126
SB1518	HY-16379	117.954
ITI-007 (tosylate)	HY-19733	117.875
QAB149	HY-14299A	117.494
Methylprednisolone hydrogen succinate (sodium)	HY-B1060	117.31
BMS-562247-01	HY-50667	117.17
LAS 34273; LAS-W 330	HY-14144	117.087
MK-3102	HY-15981	117.035
MK-521	HY-18206	116.871
MK-521 (dihydrate)	HY-18206A	116.871
MK-421 (maleate)	HY-B0331A	116.691
RU-0211; SPI-0211	HY-B0679	116.167
Fosinoprilat; Fosinoprilic acid; SQ 27519	HY-107352	116.159
UK 68789	HY-B0232	116.109
Th-1165; Phenoterol	HY-B0976	116.091
Th-1165a; Phenoterol (hydrobromide)	HY-B0976A	116.091
GS-9883 (sodium)	HY-17605A	116.08
RU44570	HY-B0592	116.071
HePC; Hexadecyl phosphocholine	HY-13685	115.872
Ro 31-2848 monohydrate	HY-A0043A	115.838
R 51619; (±)-Cisaprid	HY-14149	115.82
SQ26991	HY-B0655	115.803
L084	HY-B0396	115.538
LC15-0444 (tartrate)	HY-14892A	115.501
TA-6366	HY-B1451	115.459
Ademetionine (disulfate tosylate); S-Adenosyl methionine (disulfate tosylate); AdoMet (disulfate tosylate)	HY-W017770	115.319
TA1790	HY-18252	115.184
BLU-285	HY-101561	115.171
TAS-120	HY-100818	115.143
R 50547 (hydrochloride)	HY-14277A	115.035
BAY u3405	HY-B0745	114.967
MK-0431	HY-13749	114.951
MK-0431 (phosphate)	HY-13749A	114.951
MK-0431 (phosphate monohydrate)	HY-13749B	114.951
LX-4211; LP-802034	HY-15516	114.78
SCH 33844 (hydrochloride)	HY-A0230A	114.706
Hydrocortisone 21-hemisuccinate	HY-B1402	114.683
Prednisolone 21-hemisuccinate	HY-B1087	114.601
BAY 632521	HY-14779	114.531
DS-3201	HY-109108	114.516
DS-3201 (tosylate)	HY-109108A	114.516
BIMT-17; BIMT-17BS	HY-A0095	114.41
Volitinib; HMPL-504; AZD-6094	HY-15959	114.202
UK-92480	HY-15025	114.013
UK-92480 (citrate)	HY-15025A	114.013
PS-341; LDP-341; NSC 681239	HY-10227	114.009
UK 33274 mesylate	HY-B0098A	113.738
LNP023	HY-127105	113.729
NM441	HY-B0024	113.315
15(S)-15-Methyl Prostaglandin F2α; 15-Methyl-PGF2α	HY-128428	113.222
U 90152 (mesylate); BHAP-U 90152 (mesylate)	HY-10571A	113.154
LY307640 (sodium)	HY-B0656A	112.919
MK-0518	HY-10353	112.591
OPC 13013	HY-17464	112.304
NK-104	HY-B0144A	112.205
(R)-(-)-YM12617 (free base); LY253351 (free base)	HY-B0661	112.201
PF-02341066	HY-50878	112.145
PF-02341066 (hydrochloride)	HY-50878A	112.145
TAK-370 citrate; AS-4370 citrate	HY-B0189A	112.122
Amoxycillin	HY-B0467A	111.759
Amoxycillin (trihydrate)	HY-B0467B	111.759
HOE-498	HY-B0279	111.747
KHK7580	HY-17613	111.716
Amebacilin; NSC9168	HY-B0751	111.588
Fludroxycortide; Flurandrenolone	HY-B1013	111.553
CKD-602	HY-13566A	111.464
BI 10773	HY-15409	111.231
ONO-4059; GS-4059	HY-15771	111.194
ONO-4059 (hydrochloride); GS-4059 (hydrochloride)	HY-15771A	111.194
Thyrotropin-releasing-hormone (acetate); TRH (acetate)	HY-P0002A	111.155
EI546; LY544349; ONO5046	HY-17443	110.805
Dehydrobenzperidol	HY-B1240	110.682
Carbetapentane (citrate)	HY-B1055	110.455
Carbetapentane	HY-134004	110.455
GSK573719A	HY-12100	110.454
CV205-502 hydrochloride	HY-13736A	110.339
FCE-21336	HY-15296	110.321
PCI-32765	HY-10997	110.304
PCI-32765 (Racemate)	HY-10997A	110.304
4-Demethoxydaunorubicin hydrochloride	HY-17381	110.272
Tenivastatin (ammonium)	HY-119695A	110.256
S-Adenosyl methionine (tosylate); Ademetionine (tosylate); AdoMet (tosylate)	HY-B0617A	110.235
SA-79 (hydrochloride)	HY-B0432A	110.088
SA-79	HY-B0432	110.088
UCB-1402; NSC289116	HY-17582	110.022
UCB 1402 (dihydrochloride)	HY-A0075	110.022
Indoramine; Wy 21901	HY-12760	110.01
GS-9883	HY-17605	109.995
YC-93	HY-12515A	109.975
INC280; INCB28060	HY-13404	109.844
INC280 (dihydrochloride hydrate); INCB-28060 (dihydrochloride hydrate)	HY-13404C	109.844
FRC-8653	HY-17404	109.725
Acetorphan	HY-17399	109.657
YM178	HY-14773	109.628
PGE2; Dinoprostone	HY-101952	109.518
Mepirodipine (hydrochloride); YM-09730-5	HY-107322	109.012
NS-304; ACT-293987	HY-14870	108.878
LBH589; NVP-LBH589	HY-10224	108.816
CYT387	HY-10961	108.762
Cetapril; DU-1219	HY-107318	108.704
ODM-201; BAY-1841788	HY-16985	108.676
KAD 3213; KMD 3213	HY-10122	108.437
ONO5046-Na; Sodium sivelestat; EI546 sodium; LY544349 sodium	HY-17443A	108.418
EI546 (sodium tetrahydrate); LY544349 (sodium tetrahydrate); ONO5046 (sodium tetrahydrate)	HY-17443B	108.418
ASP1941	HY-14894	108.339
Benzathine benzylpenicillin	HY-N7139A	108.24
Benzathine benzylpenicillin (tetrahydrate)	HY-N7139B	108.24
PGP (hydrate)	HY-N7120	108.24
SL 77499	HY-B0192	108.191
SL 77499-10	HY-B0192A	108.191
NK-104 (hemicalcium); Pitavastatin (hemicalcium)	HY-B0144	108.136
Ro4402257; R1503	HY-10405	108.088
CC-10004	HY-12085	107.938
RS 61443; TM-MMF	HY-B0199	107.809
Podophyllotoxin	HY-15552	107.676
Cefalotin sodium	HY-B1275	107.608
RPC-1063	HY-12288	107.598
RPC-1063 (hydrochloride)	HY-12288A	107.598
AV-45	HY-129650	107.498
LOXO-305	HY-131328	107.257
D-(-)-α-Aminobenzylpenicillin (trihydrate)	HY-B0522B	107.055
D-(-)-α-Aminobenzylpenicillin	HY-B0522	107.055
HOE 760	HY-B0305A	107.022
BRL 42810	HY-17426	106.96
450191S	HY-U00228	106.659
MK-422	HY-B0231	106.61
CVT 303 (dihydrochloride); RS 43285	HY-17401	106.537
CVT 303; RS 43285-003	HY-B0280	106.537
R 64 766	HY-11018	106.334
S-Benzoylthiamine O-monophosphate	HY-17374	106.324
IY-81149 (sodium)	HY-B2145	106.25
BBI 4000	HY-109013	106.019
MP-601205 (isethionate)	HY-B0537B	105.914
Zucapsaicin; Civamide; cis-Capsaicin	HY-B1583	105.851
SM-3997	HY-14558	105.759
SM-3997 (citrate)	HY-B0061	105.759
ENT-14250	HY-B1198	105.73
JTZ-951; SAL0951	HY-109057	105.573
OPC-8212	HY-15297	105.416
MGCD0103	HY-12164	105.318
Vitamin B2; E101	HY-B0456	105.285
Prostaglandin F2α; PGF2α	HY-12956	105.267
Prostaglandin F2α (tromethamine salt); PGF2α THAM; Prostaglandin F2α THAM	HY-12956A	105.267
BIBW 2992	HY-10261	105.25
BIBW 2992MA2	HY-10261A	105.25
(E/Z)-BIBW 2992	HY-10261B	105.25
Balsalazide disodium dihydrate	HY-B0667A	105.151
TPX-0005	HY-103022	104.989
BGB-3111	HY-101474A	104.821
BI1744	HY-14301	104.73
BI1744 (hydrochloride)	HY-14301A	104.73
FCE 26743; EMD 1195686	HY-70057	104.553
FCE 26743 (mesylate); EMD 1195686 (mesylate)	HY-70057A	104.553
Surufatinib; HMPL-012	HY-12297	104.438
α-Lobeline (hydrochloride); L-Lobeline (hydrochloride)	HY-B0979	104.435
Hydrocortisone probutate; HBP	HY-106673	104.399
RSD1235 hydrochloride	HY-14183	104.312
SU11654; PHA 291639E	HY-10330	104.098
SU11654 (phosphate); PHA 291639E (phosphate)	HY-10330A	104.098
OZ 277; RBx 11160	HY-10852	104.079
BMS-354825	HY-10181	103.908
BMS-354825 (hydrochloride)	HY-10181A	103.908
BMS-354825 (monohydrate)	HY-10181B	103.908
BYL-719	HY-15244	103.865
CVT-3146	HY-A0168	103.531
SU 11248 (Malate)	HY-10255	103.49
SU 11248	HY-10255A	103.49
P-005672 (hydrochloride)	HY-13858A	103.276
Xanthinol Niacinate	HY-B1815	103.267
Valaciclovir hydrochloride	HY-17425A	103.24
P071	HY-17042A	103.142
(R)-Cetirizine	HY-B0814	103.142
(R)-Cetirizine (dihydrochloride)	HY-W010841	103.142
CSG-452 hydrate	HY-13413	103.129
OPC12759; Proamipide	HY-B0360	103.11
LY3009104; INCB028050	HY-15315	102.963
LY3009104 (phosphate); INCB028050 (phosphate)	HY-15315A	102.963
DA-3177	HY-U00106	102.94
Prednisolone 21-phosphate disodium	HY-B0645	102.498
NBI-98854	HY-16771	102.13
BAL-4815; RO-0094815	HY-14273	102.126
CAL-101; GS-1101	HY-13026	102.065
MP-513 (hydrobromide)	HY-14806A	102.013
LY333531 (mesylate)	HY-10195A	102.004
LY333531 (hydrochloride)	HY-10195B	102.004
AH-5158 hydrochloride; Sch-15719W	HY-B1108	101.965
AH5158; Sch-15719W (free base)	HY-121383	101.965
SK-0403	HY-14877	101.96
TAK-375	HY-A0014	101.935
Tinnex (hydrochloride)	HY-106467B	101.79
SL75212	HY-B0381A	101.763
(S)-Betaxolol hydrochloride; AL-1577A	HY-B0381B	101.763
SB939	HY-13322	101.519
Betamethasone 17-valerate	HY-B0727	101.462
Tri-O-acetyl uridine	HY-14905	101.453
R41468	HY-10562	101.414
R41468 tartrate	HY-10562A	101.414
FL-1039 hydrochloride	HY-B0810A	101.379
Amoxycillin (sodium)	HY-B0467	101.37
Sodium cholate	HY-N0324A	101.255
AG-1749	HY-13662	101.18
Dexlansoprazole	HY-13662B	101.18
D-(-)-α-Aminobenzylpenicillin (sodium salt)	HY-B0522A	101.165
Rosuvastatin hemicalcium; ZD 4522 Calcium	HY-17504	101.128
KW-6002	HY-10888	101.096
DU21220 (hydrochloride)	HY-B0452	100.865
MP-513	HY-14806	100.847
MP-513 (hydrobromide hydrate)	HY-14806B	100.847
Propericiazine; RP 8909	HY-14263	100.802
HCQ (sulfate)	HY-B1370	100.781
TVX 1322	HY-B0482	100.576
PF-04449913	HY-16391	100.561
(E)-Capsaicin	HY-10448	100.5
SKF 104864A (hydrochloride); NSC 609669 (hydrochloride)	HY-13768A	100.441
GR-85548A hydrochloride	HY-B0197A	100.294
MK-4827	HY-10619	100.201
MK-4827 (hydrochloride)	HY-10619A	100.201
MK-4827 (tosylate)	HY-10619B	100.201
MK-4827 (tosylate hydrate)	HY-10619E	100.201
Buphenine hydrochloride	HY-B1404	100.118
DAN 2163	HY-14545	100.018
Amdinocillin; FL 1060	HY-A0269	100.018
Prednisolone 21-acetate	HY-B1214	100.004
